# Supplementary material for: Quantitative Proteomic Analysis of the Response of Probiotic Putative Lactococcus lactis NCDO 2118 Strain to Different Oxygen Availability Under Temperature Variation
Source: Front Microbiol. 2019 Apr 11;10:759. doi: 10.3389/fmicb.2019.00759 (PMC6470185; doi:10.3389/fmicb.2019.00759)
Supplement: FILE S2 (TABLE 1) — Supplementary Tables S1–S9. [file Table_1.XLSX]

## Sheet: Table S.1
Table S.1: Total list of proteins identified in AN condition.
Accession	Description	Peptide count	Unique peptides	Score	COG Symbol	Biological Process	COG Group	SurfG
NCDO2118_RS01420	cold-shock protein 275892:276092 forward MW:7198	10	1	44.0926	K	Transcription	Information storage and processing	CYTOPLASMIC
NCDO2118_RS02340	carbon starvation protein CstA 457515:459869 forward MW:85336	5	3	29.839	T	Signal transduction mechanisms	Cellular processes and sinaling	PSE
NCDO2118_RS06330	ATP phosphoribosyltransferase 1308488:1309474 forward MW:37961	5	2	25.7088	E	Amino acid transport and metabolism	Metabolism	CYTOPLASMIC
NCDO2118_RS00165	PTS mannitol transporter subunit IIA 33127:33558 forward MW:15909	5	4	27.2355	G	Carbohydrate transport and metabolism	Metabolism	CYTOPLASMIC
NCDO2118_RS04805	glycosyl transferase family 2 974248:975729 forward MW:58122	3	2	14.4903	M	Cell wall/membrane/envelope biogenesis	Cellular processes and sinaling	CYTOPLASMIC
NCDO2118_RS08175	dihydrodipicolinate reductase 1708179:1708961 reverse MW:28475	2	1	8.7816	E	Amino acid transport and metabolism	Metabolism	CYTOPLASMIC
NCDO2118_RS04605	transcriptional regulator 928848:929381 reverse MW:20721	6	3	39.0955	K	Transcription	Information storage and processing	CYTOPLASMIC
NCDO2118_RS07240	ribosomal RNA small subunit methyltransferase G 1509894:1510610 forward MW:26892	4	4	29.7893	M	Cell wall/membrane/envelope biogenesis	Cellular processes and sinaling	CYTOPLASMIC
NCDO2118_RS10115	Unknown Function 2090945:2091292 reverse MW:12734	6	4	41.6177	R	General function prediction only	Poorly characterized	CYTOPLASMIC
NCDO2118_RS02110	dithiol-disulfide isomerase 410800:411318 forward MW:20204	2	1	9.6791	O	Posttranslational modification, protein turnover, chaperones	Cellular processes and sinaling	CYTOPLASMIC
NCDO2118_RS03825	Unknown Function 762637:763161 forward MW:20555	3	1	12.999	S	Function unknown	Poorly characterized	PSE
NCDO2118_RS00950	methionine sulfoxide reductase B 187242:187670 forward MW:16071	3	1	17.4198	O	Posttranslational modification, protein turnover, chaperones	Cellular processes and sinaling	CYTOPLASMIC
NCDO2118_RS12015	aminoglycoside phosphotransferase 2459822:2460463 reverse MW:24172	2	2	10.3139	L	Replication, recombination and repair	Information storage and processing	CYTOPLASMIC
NCDO2118_RS04655	glyoxalase 941034:941867 forward MW:32028	2	1	12.4822	R	General function prediction only	Poorly characterized	CYTOPLASMIC
NCDO2118_RS06250	Unknown Function 1280750:1282570 forward MW:70966	5	2	27.9794	S	Function unknown	Poorly characterized	CYTOPLASMIC
NCDO2118_RS09270	Unknown Function 1921705:1922478 forward MW:29554	3	2	15.2339	K	Transcription	Information storage and processing	MEMBRANE
NCDO2118_RS00405	glucosyl transferase family 2 79212:80147 reverse MW:35372	2	1	10.7645	M	Cell wall/membrane/envelope biogenesis	Cellular processes and sinaling	MEMBRANE
NCDO2118_RS08790	Unknown Function 1816296:1817435 forward MW:44042	4	1	16.256	K	Transcription	Information storage and processing	CYTOPLASMIC
NCDO2118_RS07830	GntR family transcriptional regulator 1632614:1633651 forward MW:38832	4	2	22.8853	K	Transcription	Information storage and processing	CYTOPLASMIC
NCDO2118_RS07655	methylase 1591565:1592308 reverse MW:29170	3	1	21.1122	QR	Secondary metabolites biosynthesis, transport and catabolism	Cellular processes and sinaling	CYTOPLASMIC
NCDO2118_RS05140	tail protein 1023248:1023862 forward MW:20981	4	2	21.4819	X	Mobilome: prophages, transposons	Cellular processes and sinaling	CYTOPLASMIC
NCDO2118_RS03170	Unknown Function 609998:610357 forward MW:13476	3	3	14.9039	S	Function unknown	Poorly characterized	CYTOPLASMIC
NCDO2118_RS00255	peroxiredoxin 51212:51649 forward MW:15371	2	1	11.5331	O	Posttranslational modification, protein turnover, chaperones	Cellular processes and sinaling	CYTOPLASMIC
NCDO2118_RS03860	isochorismate synthase 769950:771089 reverse MW:43483	4	3	19.6238	HQ	Coenzyme transport and metabolism	Metabolism	CYTOPLASMIC
NCDO2118_RS00530	Unknown Function 101866:102438 forward MW:22797	3	1	14.3311	S	Function unknown	Poorly characterized	CYTOPLASMIC
NCDO2118_RS01465	UDP-N-acetylglucosamine 2-epimerase 282547:283659 forward MW:42079	2	1	10.8237	M	Cell wall/membrane/envelope biogenesis	Cellular processes and sinaling	CYTOPLASMIC
NCDO2118_RS08320	Unknown Function 1740930:1741175 partial 5' partial 3' forward MW:9075	2	1	9.677	S	Function unknown	Poorly characterized	CYTOPLASMIC
NCDO2118_RS08340	Replication protein RepB 1744391:1744981 forward MW:23179	4	2	18.9487	M	Cell wall/membrane/envelope biogenesis	Cellular processes and sinaling	CYTOPLASMIC
NCDO2118_RS07435	1,4-beta-N-acetylmuramidase 1549098:1550381 reverse MW:46178	4	2	18.7791	M	Cell wall/membrane/envelope biogenesis	Cellular processes and sinaling	SECRETED
NCDO2118_RS06410	3-isopropylmalate dehydratase small subunit 1323150:1323725 forward MW:21848	2	1	19.665	E	Amino acid transport and metabolism	Metabolism	CYTOPLASMIC
NCDO2118_RS02990	thymidine kinase 576993:577562 forward MW:21413	3	1	15.7584	F	Nucleotide transport and metabolism	Metabolism	CYTOPLASMIC
NCDO2118_RS11840	rRNA methyltransferase 2421411:2421959 reverse MW:20419	5	2	27.4316	L	Replication, recombination and repair	Information storage and processing	CYTOPLASMIC
NCDO2118_RS04565	GTP diphosphokinase 922399:923073 forward MW:26222	9	3	48.0823	S	Function unknown	Poorly characterized	CYTOPLASMIC
NCDO2118_RS06145	Unknown Function 1229024:1230280 forward MW:48013	2	1	11.4363	R	General function prediction only	Poorly characterized	CYTOPLASMIC
NCDO2118_RS01970	LysR family transcriptional regulator 377393:378298 forward MW:34698	4	2	19.0444	K	Transcription	Information storage and processing	CYTOPLASMIC
NCDO2118_RS00395	polysaccharide deacetylase 75817:76773 forward MW:35378	2	1	11.6691	G	Carbohydrate transport and metabolism	Metabolism	PSE
NCDO2118_RS01690	acetyldiaminopimelate deacetylase 322813:323967 forward MW:43014	2	2	16.1133	R	General function prediction only	Poorly characterized	CYTOPLASMIC
NCDO2118_RS09200	LacI family transcriptional regulator 1904835:1905809 reverse MW:36375	6	3	30.2704	K	Transcription	Information storage and processing	CYTOPLASMIC
NCDO2118_RS06760	XRE family transcriptional regulator 1401082:1401840 reverse MW:28848	3	1	18.6528	K	Transcription	Information storage and processing	CYTOPLASMIC
NCDO2118_RS03850	Unknown Function 767410:768225 reverse MW:30161	8	3	38.8385	R	General function prediction only	Poorly characterized	CYTOPLASMIC
NCDO2118_RS10415	serine/threonine protein kinase 2150842:2152719 reverse MW:67639	3	2	14.601	RTKL	General function prediction only	Poorly characterized	PSE
NCDO2118_RS06795	tyrosine recombinase XerD 1408729:1409445 reverse MW:28224	3	2	13.4736	L	Replication, recombination and repair	Information storage and processing	CYTOPLASMIC
NCDO2118_RS12525	SAM-dependent methyltransferase 2547526:2548116 reverse MW:21877	2	1	10.8955	QR	Secondary metabolites biosynthesis, transport and catabolism	Metabolism	CYTOPLASMIC
NCDO2118_RS10470	primosomal protein DnaI 2159208:2161547 reverse MW:88901	5	1	21.1946	L	Replication, recombination and repair	Information storage and processing	CYTOPLASMIC
NCDO2118_RS00015	ATP-dependent helicase 3347:6646 forward MW:127070	9	7	43.7499	L	Replication, recombination and repair	Information storage and processing	CYTOPLASMIC
NCDO2118_RS02495	phosphomethylpyrimidine kinase 492420:493208 forward MW:28800	3	2	15.7638	H	Coenzyme transport and metabolism	Metabolism	CYTOPLASMIC
NCDO2118_RS08995	ribose pyranase 1862991:1863389 reverse MW:14461	4	1	29.728	G	Carbohydrate transport and metabolism	Metabolism	CYTOPLASMIC
NCDO2118_RS11025	methionine sulfoxide reductase A 2265303:2265821 reverse MW:19849	2	1	10.2347	O	Posttranslational modification, protein turnover, chaperones	Cellular processes and sinaling	CYTOPLASMIC
NCDO2118_RS10510	Unknown Function 2169375:2169839 reverse MW:18348	4	1	11.8846	KT	Transcription	Information storage and processing	PSE
NCDO2118_RS02590	6-O-methylguanine-DNA methyltransferase 510750:511259 forward MW:19085	3	1	15.2976	L	Replication, recombination and repair	Information storage and processing	CYTOPLASMIC
NCDO2118_RS06805	metallophosphoesterase 1409915:1410418 reverse MW:19076	3	1	17.6236	R	General function prediction only	Poorly characterized	CYTOPLASMIC
NCDO2118_RS12100	Unknown Function 2469797:2470321 forward MW:20739	3	1	14.0514	S	Function unknown	Poorly characterized	CYTOPLASMIC
NCDO2118_RS03015	release factor glutamine methyltransferase 580603:581415 forward MW:30912	3	1	15.0892	J	Translation, ribosomal structure and biogenesis	Information storage and processing	CYTOPLASMIC
NCDO2118_RS11260	dihydrolipoamide dehydrogenase 2315509:2316831 reverse MW:48397	3	1	14.4307	C	Energy production and conversion	Metabolism	CYTOPLASMIC
NCDO2118_RS07635	anthranilate synthase component I 1588180:1589550 reverse MW:51755	3	2	10.1186	EH	Amino acid transport and metabolism	Metabolism	CYTOPLASMIC
NCDO2118_RS06370	imidazole glycerol phosphate synthase 1314955:1315734 forward MW:28247	3	2	18.5329	E	Amino acid transport and metabolism	Metabolism	CYTOPLASMIC
NCDO2118_RS02455	sugar hydrolase 487092:487859 reverse MW:29118	2	1	9.6381	I	Lipid transport and metabolism	Metabolism	CYTOPLASMIC
NCDO2118_RS07555	Unknown Function 1569307:1569477 reverse MW:6088	2	1	11.7771	S	Function unknown	Poorly characterized	MEMBRANE
NCDO2118_RS06100	cold-shock protein 1217551:1217751 forward MW:7241	12	2	73.5642	K	Transcription	Information storage and processing	CYTOPLASMIC
NCDO2118_RS06535	sugar ABC transporter ATP-binding protein 1348838:1349836 reverse MW:38023	7	6	31.7888	R	General function prediction only	Poorly characterized	CYTOPLASMIC
NCDO2118_RS04790	exopolysaccharide biosynthesis protein 971010:971921 forward MW:33179	2	1	10.256	M	Cell wall/membrane/envelope biogenesis	Cellular processes and sinaling	MEMBRANE
NCDO2118_RS02830	RNA pyrophosphohydrolase 548048:548503 forward MW:17706	7	5	33.8607	LR	Replication, recombination and repair	Information storage and processing	CYTOPLASMIC
NCDO2118_RS12040	Unknown Function 2463770:2464075 reverse MW:11303	3	2	16.2168	S	Function unknown	Poorly characterized	CYTOPLASMIC
NCDO2118_RS10075	uracil DNA glycosylase 2082163:2082744 reverse MW:22468	9	4	49.1616	H	Coenzyme transport and metabolism	Metabolism	CYTOPLASMIC
NCDO2118_RS08415	cell division protein DivIB 1760810:1761988 reverse MW:43937	9	3	56.0726	S	Function unknown	Poorly characterized	PSE
NCDO2118_RS04155	acetyltransferase 829190:829747 reverse MW:21381	3	2	15.3364	J	Translation, ribosomal structure and biogenesis	Information storage and processing	CYTOPLASMIC
NCDO2118_RS08110	Unknown Function 1695749:1696018 reverse MW:10403	2	2	13.1993	S	Function unknown	Poorly characterized	CYTOPLASMIC
NCDO2118_RS01765	Unknown Function 337240:337440 forward MW:7537	2	2	14.345	S	Function unknown	Poorly characterized	CYTOPLASMIC
NCDO2118_RS07840	phosphoketolase 1635895:1638363 reverse MW:93482	8	4	31.3084	G	Carbohydrate transport and metabolism	Metabolism	CYTOPLASMIC
NCDO2118_RS06450	regulator 1331797:1332177 forward MW:13687	4	2	25.5251	J	Translation, ribosomal structure and biogenesis	Information storage and processing	CYTOPLASMIC
NCDO2118_RS03455	RpiR family transcriptional regulator 679123:679944 reverse MW:31287	8	4	52.88	K	Transcription	Information storage and processing	CYTOPLASMIC
NCDO2118_RS09950	pyruvate formate lyase-activating protein 2065275:2066069 reverse MW:30422	8	3	41.4513	L	Replication, recombination and repair	Information storage and processing	CYTOPLASMIC
NCDO2118_RS01430	Unknown Function 276886:277446 forward MW:21425	10	5	54.1521	S	Function unknown	Poorly characterized	MEMBRANE
NCDO2118_RS06415	molybdenum ABC transporter ATP-binding protein 1323739:1324518 forward MW:29714	5	2	29.7871	P	Inorganic ion transport and metabolism	Metabolism	CYTOPLASMIC
NCDO2118_RS09835	cysteine desulfurase 2033681:2034898 reverse MW:45308	4	2	18.9415	L	Replication, recombination and repair	Information storage and processing	CYTOPLASMIC
NCDO2118_RS05325	peptidase M20 1062818:1063957 forward MW:42182	3	1	16.4744	R	General function prediction only	Poorly characterized	CYTOPLASMIC
NCDO2118_RS05370	ABC transporter ATP-binding protein 1072940:1073818 forward MW:32708	6	6	30.9119	V	Defense mechanisms	Cellular processes and sinaling	CYTOPLASMIC
NCDO2118_RS09290	transcriptional regulator 1924381:1924683 forward MW:11909	3	2	23.723	K	Transcription	Information storage and processing	CYTOPLASMIC
NCDO2118_RS02400	transcriptional regulator 470961:471986 forward MW:37206	3	2	16.4863	IR	Lipid transport and metabolism	Metabolism	CYTOPLASMIC
NCDO2118_RS03685	glucose-1-phosphate adenylyltransferase 724457:725599 forward MW:42039	5	2	29.2416	G	Carbohydrate transport and metabolism	Metabolism	CYTOPLASMIC
NCDO2118_RS09745	ABC transporter permease 2018329:2019690 reverse MW:48924	5	5	32.4427	K	Transcription	Information storage and processing	PSE
NCDO2118_RS04580	glycosyl transferase 924356:925684 forward MW:50857	4	2	26.689	M	Cell wall/membrane/envelope biogenesis	Cellular processes and sinaling	MEMBRANE
NCDO2118_RS10960	methyltransferase 2255236:2256057 reverse MW:31627	3	2	16.8357	S	Function unknown	Poorly characterized	CYTOPLASMIC
NCDO2118_RS08980	Unknown Function 1859564:1860538 reverse MW:34410	5	5	26.1664	L	Replication, recombination and repair	Information storage and processing	PSE
NCDO2118_RS02550	DNA polymerase III subunit epsilon 502005:505187 forward MW:121462	8	6	45.6651	L	Replication, recombination and repair	Information storage and processing	CYTOPLASMIC
NCDO2118_RS01875	ABC transporter permease 359794:361506 forward MW:65128	7	2	41.9092	V	Defense mechanisms	Cellular processes and sinaling	PSE
NCDO2118_RS09310	LytR family transcriptional regulator 1927992:1929140 reverse MW:43290	4	3	21.5028	S	Function unknown	Poorly characterized	PSE
NCDO2118_RS08245	transcription antiterminator BglG 1721438:1723354 reverse MW:74415	4	2	24.5121	K	Transcription	Information storage and processing	CYTOPLASMIC
NCDO2118_RS09510	oligopeptidase PepB 1967856:1969661 reverse MW:69934	14	6	72.625	IR	Lipid transport and metabolism	Metabolism	CYTOPLASMIC
NCDO2118_RS01335	multidrug ABC transporter ATP-binding protein 259616:261493 forward MW:70302	3	3	24.0205	V	Defense mechanisms	Cellular processes and sinaling	PSE
NCDO2118_RS03695	glycogen synthase 726820:728256 forward MW:54315	4	2	20.3749	G	Carbohydrate transport and metabolism	Metabolism	CYTOPLASMIC
NCDO2118_RS11860	ECF-type sigma factor negative effector 2425357:2426463 forward MW:41713	6	4	32.2527	L	Replication, recombination and repair	Information storage and processing	PSE
NCDO2118_RS03560	Unknown Function 702362:704074 forward MW:66601	6	4	22.4179	S	Function unknown	Poorly characterized	CYTOPLASMIC
NCDO2118_RS04400	glutathione reductase 889412:890719 forward MW:47675	6	3	32.4021	C	Energy production and conversion	Metabolism	CYTOPLASMIC
NCDO2118_RS05060	Unknown Function 1013241:1013534 forward MW:10914	2	1	16.7171	S	Function unknown	Poorly characterized	CYTOPLASMIC
NCDO2118_RS11050	Unknown Function 2269021:2269473 reverse MW:17201	4	2	31.2569	S	Function unknown	Poorly characterized	MEMBRANE
NCDO2118_RS06900	zinc-binding protein 1432791:1434365 reverse MW:60118	2	1	8.7634	R	General function prediction only	Poorly characterized	PSE
NCDO2118_RS02370	RpiR family transcriptional regulator 464037:464765 forward MW:27466	3	2	14.2994	K	Transcription	Information storage and processing	CYTOPLASMIC
NCDO2118_RS06525	multidrug ABC transporter permease 1347239:1348024 reverse MW:29577	4	3	21.9204	R	General function prediction only	Poorly characterized	MEMBRANE
NCDO2118_RS09205	maltose phosphorylase 1905962:1908217 reverse MW:86361	9	7	56.0967	G	Carbohydrate transport and metabolism	Metabolism	CYTOPLASMIC
NCDO2118_RS04730	malolactic enzyme 957655:959277 forward MW:59488	2	2	10.3162	C	Energy production and conversion	Metabolism	CYTOPLASMIC
NCDO2118_RS11020	Unknown Function 2265058:2265267 reverse MW:8320	2	1	24.7474	V	Defense mechanisms	Cellular processes and sinaling	CYTOPLASMIC
NCDO2118_RS09485	SsrA-binding protein 1962046:1962513 reverse MW:17948	3	3	17.1226	E	Amino acid transport and metabolism	Metabolism	CYTOPLASMIC
NCDO2118_RS00770	CoA-binding protein 151000:151437 reverse MW:16659	5	2	25.4969	R	General function prediction only	Poorly characterized	CYTOPLASMIC
NCDO2118_RS08645	Unknown Function 1801600:1802301 reverse MW:27406	7	1	38.3551	L	Replication, recombination and repair	Information storage and processing	CYTOPLASMIC
NCDO2118_RS11675	phosphatidate cytidylyltransferase 2382546:2383349 reverse MW:29162	4	2	22.9574	GE	Carbohydrate transport and metabolism	Metabolism	MEMBRANE
NCDO2118_RS09170	phage infection protein 1895731:1898436 reverse MW:99575	13	11	47.8441	G	Carbohydrate transport and metabolism	Metabolism	PSE
NCDO2118_RS01310	carbohydrate kinase 254218:255045 forward MW:29782	3	1	20.9484	G	Carbohydrate transport and metabolism	Metabolism	CYTOPLASMIC
NCDO2118_RS02325	phosphomevalonate kinase 454401:455390 forward MW:36280	2	1	21.2106	I	Lipid transport and metabolism	Metabolism	CYTOPLASMIC
NCDO2118_RS06825	diaminopimelate decarboxylase 1412433:1413692 reverse MW:47112	2	1	8.8971	E	Amino acid transport and metabolism	Metabolism	CYTOPLASMIC
NCDO2118_RS04600	restriction endonuclease subunit S 928454:928780 forward MW:12194	5	4	31.0753	L	Replication, recombination and repair	Information storage and processing	CYTOPLASMIC
NCDO2118_RS06010	dihydropteroate synthase 1201574:1202647 forward MW:40530	3	2	13.0016	H	Coenzyme transport and metabolism	Metabolism	CYTOPLASMIC
NCDO2118_RS03970	nitroreductase 791693:792415 forward MW:26937	4	2	20.0722	C	Energy production and conversion	Metabolism	CYTOPLASMIC
NCDO2118_RS06255	Unknown Function 1282887:1284563 forward MW:63521	13	3	78.9502	S	Function unknown	Poorly characterized	CYTOPLASMIC
NCDO2118_RS06655	cytochrome C oxidase subunit II 1376193:1377668 forward MW:57087	7	4	37.0764	G	Carbohydrate transport and metabolism	Metabolism	CYTOPLASMIC
NCDO2118_RS04405	ABC transporter ATPase 890845:891762 forward MW:34162	2	2	10.488	E	Amino acid transport and metabolism	Metabolism	CYTOPLASMIC
NCDO2118_RS02900	tautomerase 560653:560838 reverse MW:6798	2	2	12.4504	R	General function prediction only	Poorly characterized	CYTOPLASMIC
NCDO2118_RS07915	cupin 1656858:1657811 forward MW:37110	6	2	38.0779	K	Transcription	Information storage and processing	CYTOPLASMIC
NCDO2118_RS12215	DNA mismatch repair protein MutL 2485787:2487757 reverse MW:73713	3	1	17.4989	L	Replication, recombination and repair	Information storage and processing	CYTOPLASMIC
NCDO2118_RS07790	endo-beta-N-acetylglucosaminidase 1619469:1622240 reverse MW:102511	16	10	99.5865	G	Carbohydrate transport and metabolism	Metabolism	PSE
NCDO2118_RS07690	Unknown Function 1596767:1597846 forward MW:40318	3	1	21.8901	E	Amino acid transport and metabolism	Metabolism	PSE
NCDO2118_RS05475	riboflavin synthase subunit alpha 1096401:1097051 forward MW:23939	4	2	24.8981	H	Coenzyme transport and metabolism	Metabolism	CYTOPLASMIC
NCDO2118_RS11090	peptide ABC transporter ATP-binding protein 2277314:2277940 reverse MW:23556	4	2	21.8898	U	Intracellular trafficking, secretion, and vesicular transport	Cellular processes and sinaling	CYTOPLASMIC
NCDO2118_RS00775	DNAse 151572:152363 forward MW:28854	3	1	13.6682	R	General function prediction only	Poorly characterized	PSE
NCDO2118_RS00990	Unknown Function 193148:193402 forward MW:9754	2	2	14.0458	S	Function unknown	Poorly characterized	CYTOPLASMIC
NCDO2118_RS03410	Unknown Function 666513:666785 reverse MW:10194	3	2	17.2792	S	Function unknown	Poorly characterized	CYTOPLASMIC
NCDO2118_RS11955	gluconate permease 2447284:2448699 reverse MW:49419	4	1	19.7472	R	General function prediction only	Poorly characterized	MEMBRANE
NCDO2118_RS06940	sugar ABC transporter substrate-binding protein 1442646:1443953 reverse MW:47526	4	1	17.3062	G	Carbohydrate transport and metabolism	Metabolism	PSE
NCDO2118_RS06695	D-alanine--poly(phosphoribitol) ligase subunit 2 1389000:1389239 reverse MW:9139	3	2	16.0482	IQ	Lipid transport and metabolism	Metabolism	CYTOPLASMIC
NCDO2118_RS03700	glycogen phosphorylase 728345:730747 forward MW:91842	17	9	92.5641	G	Carbohydrate transport and metabolism	Metabolism	CYTOPLASMIC
NCDO2118_RS08285	altronate hydrolase 1731138:1732628 reverse MW:54706	2	2	14.101	G	Carbohydrate transport and metabolism	Metabolism	CYTOPLASMIC
NCDO2118_RS05975	RNA methyltransferase 1196569:1197078 reverse MW:19842	4	3	23.9726	J	Translation, ribosomal structure and biogenesis	Information storage and processing	CYTOPLASMIC
NCDO2118_RS09560	DeoR family transcriptional regulator 1979661:1980575 reverse MW:34022	19	13	125.897	K	Transcription	Information storage and processing	CYTOPLASMIC
NCDO2118_RS02670	Unknown Function 525368:525649 forward MW:10881	3	1	14.2009	S	Function unknown	Poorly characterized	CYTOPLASMIC
NCDO2118_RS08005	short-chain dehydrogenase 1678511:1679356 reverse MW:31559	3	3	15.7532	IQR	Lipid transport and metabolism	Metabolism	CYTOPLASMIC
NCDO2118_RS11570	Unknown Function 2362067:2362498 reverse MW:16662	3	2	27.4208	I	Lipid transport and metabolism	Metabolism	PSE
NCDO2118_RS06865	XRE family transcriptional regulator 1425637:1426467 reverse MW:32929	4	1	19.3478	K	Transcription	Information storage and processing	CYTOPLASMIC
NCDO2118_RS05765	ABC transporter permease 1147400:1150081 forward MW:100336	5	3	20.7479	V	Defense mechanisms	Cellular processes and sinaling	PSE
NCDO2118_RS08970	GntR family transcriptional regulator 1857204:1857887 forward MW:26546	2	2	15.22	G	Carbohydrate transport and metabolism	Metabolism	CYTOPLASMIC
NCDO2118_RS04320	serine dehydratase subunit alpha 869914:870777 forward MW:29743	7	2	42.8113	E	Amino acid transport and metabolism	Metabolism	CYTOPLASMIC
NCDO2118_RS02250	NADH oxidase 440949:442289 forward MW:48922	9	4	50.0801	R	General function prediction only	Poorly characterized	CYTOPLASMIC
NCDO2118_RS05180	lysozyme 1035331:1036245 forward MW:34020	3	3	15.1128	M	Cell wall/membrane/envelope biogenesis	Cellular processes and sinaling	CYTOPLASMIC
NCDO2118_RS02540	lysine decarboxylase 500318:500872 reverse MW:20306	4	1	15.2173	R	General function prediction only	Poorly characterized	CYTOPLASMIC
NCDO2118_RS12010	DNA polymerase III subunit gamma/tau 2458115:2459773 reverse MW:60751	8	4	39.7991	L	Replication, recombination and repair	Information storage and processing	CYTOPLASMIC
NCDO2118_RS09230	neopullulanase 1913947:1915701 reverse MW:68061	22	16	126.654	G	Carbohydrate transport and metabolism	Metabolism	CYTOPLASMIC
NCDO2118_RS09090	cell division protein FtsK 1881462:1883735 reverse MW:83027	14	8	69.1047	S	Function unknown	Poorly characterized	PSE
NCDO2118_RS09080	DNA polymerase III subunit delta 1879879:1880883 reverse MW:38091	4	1	21.1362	D	Cell cycle control, cell division, chromosome partitioning	Cellular processes and sinaling	CYTOPLASMIC
NCDO2118_RS09395	regulator 1945446:1945817 forward MW:13774	4	4	21.991	O	Posttranslational modification, protein turnover, chaperones	Cellular processes and sinaling	CYTOPLASMIC
NCDO2118_RS09900	methylated-DNA--protein-cysteine methyltransferase 2053153:2053458 reverse MW:11442	2	1	10.6666	O	Posttranslational modification, protein turnover, chaperones	Cellular processes and sinaling	CYTOPLASMIC
NCDO2118_RS04465	bifunctional protein FolD 902605:903459 forward MW:31121	5	4	25.7713	H	Coenzyme transport and metabolism	Metabolism	CYTOPLASMIC
NCDO2118_RS04570	50S ribosomal protein L19 923214:923558 forward MW:13119	33	25	162.173	J	Translation, ribosomal structure and biogenesis	Information storage and processing	CYTOPLASMIC
NCDO2118_RS11610	competence protein ComGF 2367494:2367940 reverse MW:17084	2	1	9.4531	X	Mobilome: prophages, transposons	Cellular processes and sinaling	MEMBRANE
NCDO2118_RS00860	Unknown Function 168626:169720 forward MW:41334	12	5	95.0211	S	Function unknown	Poorly characterized	CYTOPLASMIC
NCDO2118_RS09680	Unknown Function 2004738:2006657 reverse MW:69838	14	6	78.1574	CP	Energy production and conversion	Metabolism	PSE
NCDO2118_RS09770	TenA family transcriptional regulator 2023526:2024182 reverse MW:25608	12	8	61.8944	E	Amino acid transport and metabolism	Metabolism	CYTOPLASMIC
NCDO2118_RS00850	Unknown Function 166419:166850 forward MW:16607	5	1	25.3406	S	Function unknown	Poorly characterized	CYTOPLASMIC
NCDO2118_RS03890	Unknown Function 777082:777426 forward MW:12762	3	2	28.0305	S	Function unknown	Poorly characterized	MEMBRANE
NCDO2118_RS10435	membrane protein 2155575:2155763 reverse MW:7112	2	1	15.4274	QR	Secondary metabolites biosynthesis, transport and catabolism	Cellular processes and sinaling	MEMBRANE
NCDO2118_RS03730	cytochrome C nitrate reductase 739712:741433 forward MW:64217	3	2	10.6846	CO	Energy production and conversion	Metabolism	PSE
NCDO2118_RS07275	6-phospho-beta-glucosidase 1516536:1517963 reverse MW:55538	7	4	34.1975	G	Carbohydrate transport and metabolism	Metabolism	CYTOPLASMIC
NCDO2118_RS1069	phenylalanine--tRNA ligase subunit alpha 2203741:2204781 reverse MW:39301	22	11	117.862	C	Energy production and conversion	Metabolism	CYTOPLASMIC
NCDO2118_RS03745	lysophospholipase 743143:743817 forward MW:25800	2	1	8.7697	E	Amino acid transport and metabolism	Metabolism	CYTOPLASMIC
NCDO2118_RS01990	glyoxalase 380883:381275 forward MW:15469	2	1	10.0347	E	Amino acid transport and metabolism	Metabolism	CYTOPLASMIC
NCDO2118_RS10110	thiamine pyrophosphokinase 2090313:2090948 reverse MW:23632	5	4	29.3505	S	Function unknown	Poorly characterized	CYTOPLASMIC
NCDO2118_RS05760	ABC transporter ATP-binding protein 1146695:1147396 forward MW:25951	4	1	20.9821	V	Defense mechanisms	Cellular processes and sinaling	CYTOPLASMIC
NCDO2118_RS10980	glycerophosphodiester phosphodiesterase 2258642:2260447 reverse MW:68884	7	3	43.7997	R	General function prediction only	Poorly characterized	PSE
NCDO2118_RS08150	alcohol dehydrogenase 1702799:1703875 reverse MW:39012	2	1	10.005	C	Energy production and conversion	Metabolism	CYTOPLASMIC
NCDO2118_RS07405	aldo/keto reductase 1544971:1545342 forward MW:14251	10	3	61.0034	S	Function unknown	Poorly characterized	PSE
NCDO2118_RS06180	PKS acyl-CoA transferase 1253492:1254757 forward MW:46929	3	1	18.0554	I	Lipid transport and metabolism	Metabolism	CYTOPLASMIC
NCDO2118_RS06405	isopropylmalate isomerase 1321748:1323130 forward MW:50564	6	1	31.1022	E	Amino acid transport and metabolism	Metabolism	CYTOPLASMIC
NCDO2118_RS06780	pseudouridine synthase 1406706:1407425 reverse MW:26608	16	9	114.341	J	Translation, ribosomal structure and biogenesis	Information storage and processing	CYTOPLASMIC
NCDO2118_RS05425	protein NrdI 1085485:1085907 reverse MW:15660	3	1	17.2772	F	Nucleotide transport and metabolism	Metabolism	CYTOPLASMIC
NCDO2118_RS02335	superoxide dismutase [Mn] 456645:457265 forward MW:23254	13	9	99.0618	P	Inorganic ion transport and metabolism	Metabolism	CYTOPLASMIC
NCDO2118_RS01805	thiol peroxidase 344355:344837 forward MW:17440	12	8	81.4672	O	Posttranslational modification, protein turnover, chaperones	Cellular processes and sinaling	CYTOPLASMIC
NCDO2118_RS08185	transposase 1709925:1710317 reverse MW:15026	6	4	56.0169	S	Function unknown	Poorly characterized	CYTOPLASMIC
NCDO2118_RS05310	protein GrpE 1058341:1058880 forward MW:20581	26	19	162.535	O	Posttranslational modification, protein turnover, chaperones	Cellular processes and sinaling	CYTOPLASMIC
NCDO2118_RS00300	O-acetylhomoserine aminocarboxypropyltransferase 59566:60846 reverse MW:46257	5	3	31.9631	E	Amino acid transport and metabolism	Metabolism	CYTOPLASMIC
NCDO2118_RS02035	ABC transporter substrate-binding protein 392244:393881 forward MW:59820	46	28	320.098	E	Amino acid transport and metabolism	Metabolism	PSE
NCDO2118_RS06115	N-acetylmannosamine-6-phosphate 2-epimerase 1222773:1223468 reverse MW:25420	16	10	81.8451	G	Carbohydrate transport and metabolism	Metabolism	CYTOPLASMIC
NCDO2118_RS12240	Unknown Function 2492898:2493104 reverse MW:8266	2	2	10.6044	S	Function unknown	Poorly characterized	CYTOPLASMIC
NCDO2118_RS12380	alkylphosphonate transporter 2522202:2522546 reverse MW:12389	3	2	13.9519	P	Inorganic ion transport and metabolism	Metabolism	CYTOPLASMIC
NCDO2118_RS10325	cell division protein 2133827:2134504 reverse MW:25533	15	9	93.0974	R	General function prediction only	Poorly characterized	CYTOPLASMIC
NCDO2118_RS02200	FMN-dependent NADH-azoreductase 2 430492:431097 forward MW:21913	5	2	54.9903	I	Lipid transport and metabolism	Metabolism	CYTOPLASMIC
NCDO2118_RS01780	phosphonate ABC transporter substrate-binding protein 338918:339967 forward MW:37449	6	4	33.7305	P	Inorganic ion transport and metabolism	Metabolism	PSE
NCDO2118_RS10985	histidine triad protein 2260726:2261127 forward MW:14986	7	3	61.6149	FGR	Nucleotide transport and metabolism	Metabolism	CYTOPLASMIC
NCDO2118_RS11065	DNA methyltransferase 2272333:2273271 reverse MW:34799	13	7	103.078	L	Replication, recombination and repair	Information storage and processing	CYTOPLASMIC
NCDO2118_RS02825	peptide deformylase 547259:547894 reverse MW:23769	23	17	179.536	J	Translation, ribosomal structure and biogenesis	Information storage and processing	CYTOPLASMIC
NCDO2118_RS01685	2,3,4,5-tetrahydropyridine-2,6-dicarboxylate N-acetyltransferase 321906:322676 forward MW:26777	9	5	45.4718	E	Amino acid transport and metabolism	Metabolism	CYTOPLASMIC
NCDO2118_RS08900	aspartate-semialdehyde dehydrogenase 1839588:1840664 reverse MW:39251	12	6	79.5406	E	Amino acid transport and metabolism	Metabolism	CYTOPLASMIC
NCDO2118_RS10485	ribonuclease Y 2162901:2164496 reverse MW:60318	25	16	148.406	R	General function prediction only	Poorly characterized	PSE
NCDO2118_RS10905	aldose 1-epimerase 2244316:2245335 reverse MW:37385	46	36	336.681	G	Carbohydrate transport and metabolism	Metabolism	CYTOPLASMIC
NCDO2118_RS04175	3-ketoacyl-ACP reductase 833637:834368 forward MW:25573	6	6	41.0233	IQR	Lipid transport and metabolism	Metabolism	PSE
NCDO2118_RS07585	6-phospho-beta-glucosidase 1577515:1578951 reverse MW:54082	21	15	114.661	G	Carbohydrate transport and metabolism	Metabolism	CYTOPLASMIC
NCDO2118_RS07325	23S rRNA pseudouridylate synthase 1527215:1527751 reverse MW:20348	8	2	49.2295	J	Translation, ribosomal structure and biogenesis	Information storage and processing	CYTOPLASMIC
NCDO2118_RS09450	PhoU family transcriptional regulator 1955152:1955805 reverse MW:24477	16	10	116.479	P	Inorganic ion transport and metabolism	Metabolism	CYTOPLASMIC
NCDO2118_RS04695	peptidyl-prolyl cis-trans isomerase 950002:950592 forward MW:21560	14	9	85.5824	O	Posttranslational modification, protein turnover, chaperones	Cellular processes and sinaling	CYTOPLASMIC
NCDO2118_RS08830	gamma-glutamyl phosphate reductase 1824042:1825283 reverse MW:45250	21	11	150.372	E	Amino acid transport and metabolism	Metabolism	CYTOPLASMIC
NCDO2118_RS06015	DHNTP pyrophosphohydrolase 1202650:1203147 forward MW:19183	4	3	20.5305	LR	Replication, recombination and repair	Information storage and processing	CYTOPLASMIC
NCDO2118_RS03665	elongation factor P 720068:720625 forward MW:20653	4	2	28.4103	J	Translation, ribosomal structure and biogenesis	Information storage and processing	CYTOPLASMIC
NCDO2118_RS11555	acyltransferase 2356956:2358773 reverse MW:68281	6	5	36.9656	I	Lipid transport and metabolism	Metabolism	PSE
NCDO2118_RS04350	tRNA-specific 2-thiouridylase MnmA 877889:879019 forward MW:41918	7	4	38.4663	J	Translation, ribosomal structure and biogenesis	Information storage and processing	CYTOPLASMIC
NCDO2118_RS10850	protease 2231829:2233106 reverse MW:48082	9	3	52.4254	R	General function prediction only	Poorly characterized	CYTOPLASMIC
NCDO2118_RS10885	beta-D-galactosidase 2237769:2240759 reverse MW:115147	68	46	455.064	G	Carbohydrate transport and metabolism	Metabolism	CYTOPLASMIC
NCDO2118_RS11125	ferritin 2283168:2283614 reverse MW:16653	33	25	285.099	P	Inorganic ion transport and metabolism	Metabolism	CYTOPLASMIC
NCDO2118_RS01115	GTP-binding protein 219861:221105 forward MW:46600	13	8	79.2442	R	General function prediction only	Poorly characterized	CYTOPLASMIC
NCDO2118_RS11705	glycosyltransferase 2387807:2388805 forward MW:37970	6	4	32.9688	M	Cell wall/membrane/envelope biogenesis	Cellular processes and sinaling	CYTOPLASMIC
NCDO2118_RS09945	pyrophosphatase 2064127:2065071 reverse MW:34111	17	11	116.189	C	Energy production and conversion	Metabolism	CYTOPLASMIC
NCDO2118_RS11490	50S ribosomal protein L22 2348564:2348911 reverse MW:12469	14	12	106.71	J	Translation, ribosomal structure and biogenesis	Information storage and processing	CYTOPLASMIC
NCDO2118_RS09675	glutamine ABC transporter ATP-binding protein 2003886:2004629 forward MW:27071	18	9	138.964	E	Amino acid transport and metabolism	Metabolism	CYTOPLASMIC
NCDO2118_RS05750	GCN5 family acetyltransferase 1145195:1145680 forward MW:18840	7	4	53.4075	KR	Transcription	Information storage and processing	CYTOPLASMIC
NCDO2118_RS09195	transcriptional regulator 1903989:1904666 reverse MW:25850	13	7	76.2806	TK	Signal transduction mechanisms	Cellular processes and sinaling	CYTOPLASMIC
NCDO2118_RS05860	Unknown Function 1173900:1174592 forward MW:24419	8	5	59.1006	S	Function unknown	Poorly characterized	SECRETED
NCDO2118_RS02065	RNA helicase 399971:401614 forward MW:61003	42	23	259.254	LKJ	Replication, recombination and repair	Information storage and processing	CYTOPLASMIC
NCDO2118_RS09670	amino acid ABC transporter permease 2001726:2003870 forward MW:78331	56	34	392.995	ET	Amino acid transport and metabolism	Metabolism	PSE
NCDO2118_RS10270	ribose-phosphate pyrophosphokinase 2122846:2123811 forward MW:35218	17	11	156.27	FE	Nucleotide transport and metabolism	Metabolism	CYTOPLASMIC
NCDO2118_RS03300	enolase 636218:637519 forward MW:46912	78	59	479.733	G	Carbohydrate transport and metabolism	Metabolism	CYTOPLASMIC
NCDO2118_RS09065	RNA methyltransferase 1877651:1878805 reverse MW:43294	13	10	74.4735	L	Replication, recombination and repair	Information storage and processing	CYTOPLASMIC
NCDO2118_RS10430	transcriptional regulator 2155048:2155554 reverse MW:18451	22	14	174.37	S	Function unknown	Poorly characterized	CYTOPLASMIC
NCDO2118_RS07380	Unknown Function 1540941:1541369 reverse MW:15314	15	12	117.624	T	Signal transduction mechanisms	Cellular processes and sinaling	CYTOPLASMIC
NCDO2118_RS00805	glutamyl-tRNA(Gln) amidotransferase subunit C 157617:157922 forward MW:11213	24	19	128.439	J	Translation, ribosomal structure and biogenesis	Information storage and processing	CYTOPLASMIC
NCDO2118_RS05245	thioredoxin reductase 1045945:1046871 forward MW:33910	10	6	57.9131	O	Posttranslational modification, protein turnover, chaperones	Cellular processes and sinaling	CYTOPLASMIC
NCDO2118_RS09890	transcriptional regulator 2050429:2051103 forward MW:26007	2	2	9.5265	S	Function unknown	Poorly characterized	CYTOPLASMIC
NCDO2118_RS02360	PTS sugar transporter 463182:463508 forward MW:11310	22	18	125.365	G	Carbohydrate transport and metabolism	Metabolism	SECRETED
NCDO2118_RS10205	translation initiation factor IF-3 2108710:2109249 reverse MW:20540	11	6	71.0246	J	Translation, ribosomal structure and biogenesis	Information storage and processing	CYTOPLASMIC
NCDO2118_RS01035	alpha-L-Rha alpha-1,3-L-rhamnosyltransferase 202105:203874 forward MW:69993	21	17	131.238	M	Cell wall/membrane/envelope biogenesis	Cellular processes and sinaling	CYTOPLASMIC
NCDO2118_RS09495	alanine--tRNA ligase 1963207:1965825 reverse MW:96345	78	61	582.605	J	Translation, ribosomal structure and biogenesis	Information storage and processing	CYTOPLASMIC
NCDO2118_RS03440	PTS sucrose transporter subunit IIABC 674352:676304 forward MW:69602	19	12	138.883	G	Carbohydrate transport and metabolism	Metabolism	PSE
NCDO2118_RS05810	sortase 1161541:1162287 forward MW:27709	8	4	39.6864	M	Cell wall/membrane/envelope biogenesis	Cellular processes and sinaling	PSE
NCDO2118_RS09895	neutral endopeptidase 2051216:2053099 forward MW:71520	47	29	299.216	O	Posttranslational modification, protein turnover, chaperones	Cellular processes and sinaling	CYTOPLASMIC
NCDO2118_RS06660	lactate oxidase 1377729:1378829 reverse MW:38994	29	18	184.673	C	Energy production and conversion	Metabolism	CYTOPLASMIC
NCDO2118_RS01250	dihydroxyacetone kinase subunit DhaK 242304:243296 forward MW:35942	16	12	116.287	G	Carbohydrate transport and metabolism	Metabolism	CYTOPLASMIC
NCDO2118_RS07330	carbamoyl phosphate synthase large subunit 1528187:1531381 reverse MW:117660	97	66	644.185	EF	Amino acid transport and metabolism	Metabolism	CYTOPLASMIC
NCDO2118_RS07345	calcium-transporting ATPase 1533019:1535655 reverse MW:96006	42	24	222.168	P	Inorganic ion transport and metabolism	Metabolism	MEMBRANE
NCDO2118_RS11575	FMN-binding protein 2362612:2362989 reverse MW:14130	3	2	16.794	R	General function prediction only	Poorly characterized	CYTOPLASMIC
NCDO2118_RS10275	Unknown Function 2123933:2124364 reverse MW:16112	13	9	105.854	T	Signal transduction mechanisms	Cellular processes and sinaling	CYTOPLASMIC
NCDO2118_RS06170	transcriptional regulator 1235306:1235908 forward MW:22529	15	7	99.1004	TK	Signal transduction mechanisms	Cellular processes and sinaling	CYTOPLASMIC
NCDO2118_RS01235	phosphoglycerate kinase 239401:240597 forward MW:42066	80	64	513.138	G	Carbohydrate transport and metabolism	Metabolism	CYTOPLASMIC
NCDO2118_RS11720	Unknown Function 2390745:2391749 forward MW:36670	50	30	307.19	S	Function unknown	Poorly characterized	PSE
NCDO2118_RS00270	phosphate acyltransferase 53592:54587 reverse MW:34702	10	5	61.9035	I	Lipid transport and metabolism	Metabolism	CYTOPLASMIC
NCDO2118_RS00235	lipoate-protein ligase A 46792:47793 reverse MW:37855	17	9	125.6	H	Coenzyme transport and metabolism	Metabolism	CYTOPLASMIC
NCDO2118_RS10610	Unknown Function 2185970:2186578 reverse MW:22557	9	6	70.7454	R	General function prediction only	Poorly characterized	CYTOPLASMIC
NCDO2118_RS01100	inosine-5-monophosphate dehydrogenase 216372:217853 forward MW:52827	42	28	329.718	F	Nucleotide transport and metabolism	Metabolism	CYTOPLASMIC
NCDO2118_RS04220	chromosome segregation protein SMC 842262:845786 forward MW:132554	10	2	57.5898	D	Cell cycle control, cell division, chromosome partitioning	Cellular processes and sinaling	CYTOPLASMIC
NCDO2118_RS04880	phosphopentomutase 993392:994627 forward MW:45742	43	27	270.331	G	Carbohydrate transport and metabolism	Metabolism	CYTOPLASMIC
NCDO2118_RS09705	ATP synthase subunit alpha 2010473:2011975 reverse MW:54307	42	29	244.046	C	Energy production and conversion	Metabolism	CYTOPLASMIC
NCDO2118_RS12020	Unknown Function 2460495:2460983 reverse MW:18275	11	7	71.3895	T	Signal transduction mechanisms	Cellular processes and sinaling	CYTOPLASMIC
NCDO2118_RS02005	NADH dehydrogenase 382956:384485 forward MW:55094	33	18	200.409	O	Posttranslational modification, protein turnover, chaperones	Cellular processes and sinaling	CYTOPLASMIC
NCDO2118_RS00220	dihydrolipoamide acetyltransferase 43005:44603 reverse MW:56257	46	30	245.291	C	Energy production and conversion	Metabolism	CYTOPLASMIC
NCDO2118_RS03135	6-phosphogluconate dehydrogenase 600441:601856 forward MW:52322	58	47	362.267	G	Carbohydrate transport and metabolism	Metabolism	CYTOPLASMIC
NCDO2118_RS04930	Unknown Function 1000763:1001092 reverse MW:12688	5	4	38.0154	S	Function unknown	Poorly characterized	CYTOPLASMIC
NCDO2118_RS00350	chromosome partitioning protein ParB 68199:68984 reverse MW:29742	10	6	63.9777	K	Transcription	Information storage and processing	CYTOPLASMIC
NCDO2118_RS06035	homoserine kinase 1206685:1207575 forward MW:31908	7	3	46.3802	E	Amino acid transport and metabolism	Metabolism	CYTOPLASMIC
NCDO2118_RS02880	hydrolase 557822:558580 reverse MW:28278	28	22	157.72	R	General function prediction only	Poorly characterized	CYTOPLASMIC
NCDO2118_RS03765	ABC transporter ATP-binding protein 747226:749220 reverse MW:71737	27	17	173.06	V	Defense mechanisms	Cellular processes and sinaling	PSE
NCDO2118_RS10615	uracil phosphoribosyltransferase 2186720:2187355 reverse MW:23231	19	14	99.4413	F	Nucleotide transport and metabolism	Metabolism	CYTOPLASMIC
NCDO2118_RS11040	ribosome-recycling factor 2267450:2268007 reverse MW:20748	41	24	257.334	J	Translation, ribosomal structure and biogenesis	Information storage and processing	CYTOPLASMIC
NCDO2118_RS11420	50S ribosomal protein L30 2341980:2342159 reverse MW:6193	16	14	88.134	J	Translation, ribosomal structure and biogenesis	Information storage and processing	CYTOPLASMIC
NCDO2118_RS11110	Unknown Function 2281471:2281692 forward MW:8730	8	3	45.947	S	Function unknown	Poorly characterized	CYTOPLASMIC
NCDO2118_RS09060	Unknown Function 1875504:1877504 reverse MW:72110	27	21	205.296	S	Function unknown	Poorly characterized	PSE
NCDO2118_RS01350	S-ribosylhomocysteine lyase 263647:264123 reverse MW:17605	15	10	99.4963	T	Signal transduction mechanisms	Cellular processes and sinaling	CYTOPLASMIC
NCDO2118_RS08190	tRNA (guanine-N1)-methyltransferase 1710442:1711185 reverse MW:28219	7	5	49.3671	J	Translation, ribosomal structure and biogenesis	Information storage and processing	CYTOPLASMIC
NCDO2118_RS03130	Unknown Function 599745:600308 forward MW:20604	55	35	350.163	S	Function unknown	Poorly characterized	PSE
NCDO2118_RS04045	ribosome-binding factor A 810674:811033 forward MW:13416	15	12	74.8382	J	Translation, ribosomal structure and biogenesis	Information storage and processing	CYTOPLASMIC
NCDO2118_RS08845	Unknown Function 1827730:1827954 reverse MW:8306	2	2	22.3509	S	Function unknown	Poorly characterized	CYTOPLASMIC
NCDO2118_RS07200	N-acetylglucosamine-6-phosphate deacetylase 1502471:1503619 reverse MW:41211	23	14	160.984	G	Carbohydrate transport and metabolism	Metabolism	CYTOPLASMIC
NCDO2118_RS02000	alkyl hydroperoxide reductase subunit C 382327:382890 forward MW:20603	16	11	111.957	O	Posttranslational modification, protein turnover, chaperones	Cellular processes and sinaling	CYTOPLASMIC
NCDO2118_RS08835	gamma-glutamyl kinase 1825301:1826107 reverse MW:29381	3	3	16.5331	E	Amino acid transport and metabolism	Metabolism	CYTOPLASMIC
NCDO2118_RS09025	Unknown Function 1867876:1868079 reverse MW:7224	7	6	43.4293	S	Function unknown	Poorly characterized	CYTOPLASMIC
NCDO2118_RS07215	glycerol-3-phosphate dehydrogenase 1505933:1506958 forward MW:37188	24	18	168.486	C	Energy production and conversion	Metabolism	CYTOPLASMIC
NCDO2118_RS04065	acyl carrier protein 814162:814383 forward MW:8401	10	10	49.9571	IQ	Lipid transport and metabolism	Metabolism	CYTOPLASMIC
NCDO2118_RS11965	6-phosphogluconate dehydrogenase 2450465:2451370 reverse MW:33040	11	7	71.9195	G	Carbohydrate transport and metabolism	Metabolism	CYTOPLASMIC
NCDO2118_RS03375	ATP-dependent Clp protease proteolytic subunit 657997:658596 reverse MW:22082	5	3	47.247	OU	Posttranslational modification, protein turnover, chaperones	Cellular processes and sinaling	CYTOPLASMIC
NCDO2118_RS00985	dTDP-4-dehydrorhamnose 3,5-epimerase 192555:193148 forward MW:22356	16	12	111.792	M	Cell wall/membrane/envelope biogenesis	Cellular processes and sinaling	CYTOPLASMIC
NCDO2118_RS02105	Unknown Function 410244:410570 forward MW:12706	4	1	29.2617	S	Function unknown	Poorly characterized	CYTOPLASMIC
NCDO2118_RS11195	UDP-N-acetylmuramate--alanine ligase 2298051:2299382 reverse MW:50078	28	21	190.357	M	Cell wall/membrane/envelope biogenesis	Cellular processes and sinaling	CYTOPLASMIC
NCDO2118_RS05870	riboflavin biosynthesis protein RibF 1175752:1176654 forward MW:34258	11	6	64.7558	H	Coenzyme transport and metabolism	Metabolism	CYTOPLASMIC
NCDO2118_RS05755	NAD synthetase 1145741:1146565 forward MW:30209	13	7	91.6088	H	Coenzyme transport and metabolism	Metabolism	CYTOPLASMIC
NCDO2118_RS12505	30S ribosomal protein S7 2543903:2544370 reverse MW:17683	25	18	190.841	J	Translation, ribosomal structure and biogenesis	Information storage and processing	CYTOPLASMIC
NCDO2118_RS05545	transcriptional regulator 1109818:1110468 reverse MW:24293	25	17	171.234	R	General function prediction only	Poorly characterized	CYTOPLASMIC
NCDO2118_RS09875	DNA-directed RNA polymerase subunit beta' 2041999:2045622 reverse MW:134717	152	101	961.512	K	Transcription	Information storage and processing	CYTOPLASMIC
NCDO2118_RS11185	arginine--tRNA ligase 2295648:2297342 reverse MW:62819	68	46	453.234	J	Translation, ribosomal structure and biogenesis	Information storage and processing	CYTOPLASMIC
NCDO2118_RS10440	Unknown Function 2155774:2156334 reverse MW:21500	5	2	35.317	S	Function unknown	Poorly characterized	MEMBRANE
NCDO2118_RS00685	polysaccharide biosynthesis protein 134752:135531 forward MW:28163	5	3	41.41	M	Cell wall/membrane/envelope biogenesis	Cellular processes and sinaling	PSE
NCDO2118_RS10230	Unknown Function 2114204:2114572 reverse MW:14737	5	3	28.132	S	Function unknown	Poorly characterized	CYTOPLASMIC
NCDO2118_RS05725	Unknown Function 1140909:1141151 forward MW:9216	20	15	152.597	S	Function unknown	Poorly characterized	CYTOPLASMIC
NCDO2118_RS00460	phosphoenolpyruvate-protein phosphotransferase 90414:92141 forward MW:62561	58	46	443.298	G	Carbohydrate transport and metabolism	Metabolism	CYTOPLASMIC
NCDO2118_RS05990	ATP-dependent Clp protease ATP-binding subunit ClpX 1198225:1199460 forward MW:46025	16	10	112.202	O	Posttranslational modification, protein turnover, chaperones	Cellular processes and sinaling	CYTOPLASMIC
NCDO2118_RS00345	cobalt ABC transporter ATP-binding protein 66365:68146 forward MW:63361	13	8	101.156	P	Inorganic ion transport and metabolism	Metabolism	PSE
NCDO2118_RS04475	exodeoxyribonuclease 7 small subunit 904879:905118 forward MW:8964	12	11	74.6846	L	Replication, recombination and repair	Information storage and processing	CYTOPLASMIC
NCDO2118_RS02490	tRNA pseudouridine synthase B 1174732:1175721 forward MW:36286	4	3	21.9101	J	Translation, ribosomal structure and biogenesis	Information storage and processing	CYTOPLASMIC
NCDO2118_RS08765	Unknown Function 1813097:1813465 forward MW:13877	9	3	59.69	S	Function unknown	Poorly characterized	CYTOPLASMIC
NCDO2118_RS10495	S-adenosylmethionine synthetase 2165545:2166744 reverse MW:43031	17	11	141.538	H	Coenzyme transport and metabolism	Metabolism	CYTOPLASMIC
NCDO2118_RS10855	Unknown Function 2233313:2233675 forward MW:13571	4	4	26.9078	S	Function unknown	Poorly characterized	CYTOPLASMIC
NCDO2118_RS08730	Unknown Function 1810039:1810539 forward MW:19075	13	7	88.8171	S	Function unknown	Poorly characterized	CYTOPLASMIC
NCDO2118_RS02305	16S rRNA methyltransferase 451013:451888 forward MW:32549	8	6	51.74	R	General function prediction only	Poorly characterized	CYTOPLASMIC
NCDO2118_RS00390	16S rRNA methyltransferase 75036:75788 forward MW:27884	8	4	49.6701	S	Function unknown	Poorly characterized	CYTOPLASMIC
NCDO2118_RS05955	GMP reductase 1192800:1193789 forward MW:35811	25	14	155.538	F	Nucleotide transport and metabolism	Metabolism	CYTOPLASMIC
NCDO2118_RS06665	phospho-2-dehydro-3-deoxyheptonate aldolase 1379115:1380137 reverse MW:38819	14	10	82.5134	E	Amino acid transport and metabolism	Metabolism	CYTOPLASMIC
NCDO2118_RS00280	ABC transporter ATP-binding protein 55628:57265 reverse MW:61408	46	28	302.175	R	General function prediction only	Poorly characterized	CYTOPLASMIC
NCDO2118_RS11120	NADH dehydrogenase 2282699:2283085 forward MW:14294	10	6	62.4705	P	Inorganic ion transport and metabolism	Metabolism	CYTOPLASMIC
NCDO2118_RS01085	glycerophosphoryl diester phosphodiesterase 212805:214031 forward MW:45611	43	33	288.836	C	Energy production and conversion	Metabolism	PSE
NCDO2118_RS10160	penicillin acylase 2099897:2100898 reverse MW:37368	7	5	46.7467	M	Cell wall/membrane/envelope biogenesis	Cellular processes and sinaling	CYTOPLASMIC
NCDO2118_RS11015	ABC transporter ATP-binding protein 2264105:2264983 reverse MW:33259	15	9	89.9292	V	Defense mechanisms	Cellular processes and sinaling	CYTOPLASMIC
NCDO2118_RS11670	metalloprotease RseP 2381241:2382527 reverse MW:46384	22	16	142.595	M	Cell wall/membrane/envelope biogenesis	Cellular processes and sinaling	PSE
NCDO2118_RS05790	oxidoreductase 1155243:1155878 forward MW:23117	21	13	153.107	MG	Cell wall/membrane/envelope biogenesis	Cellular processes and sinaling	CYTOPLASMIC
NCDO2118_RS01450	N5-(carboxyethyl)ornithine synthase 279330:280268 forward MW:35224	4	2	22.6613	E	Amino acid transport and metabolism	Metabolism	CYTOPLASMIC
NCDO2118_RS09935	peptidase T 2062060:2063301 reverse MW:45928	44	33	326.699	E	Amino acid transport and metabolism	Metabolism	CYTOPLASMIC
NCDO2118_RS11900	aldose 1-epimerase 2434436:2434684 reverse MW:9650	16	15	92.2304	R	General function prediction only	Poorly characterized	CYTOPLASMIC
NCDO2118_RS07620	indole-3-glycerol-phosphate synthase 1585622:1586416 reverse MW:29756	3	2	14.4573	E	Amino acid transport and metabolism	Metabolism	CYTOPLASMIC
NCDO2118_RS03355	pyruvate carboxylase 649267:652680 forward MW:126462	66	37	510.993	C	Energy production and conversion	Metabolism	CYTOPLASMIC
NCDO2118_RS10450	methionyl-tRNA formyltransferase 2156779:2157738 reverse MW:35165	10	7	59.6986	J	Translation, ribosomal structure and biogenesis	Information storage and processing	CYTOPLASMIC
NCDO2118_RS06850	potassium transporter KefA 1421703:1422449 forward MW:27669	6	4	34.0458	M	Cell wall/membrane/envelope biogenesis	Cellular processes and sinaling	MEMBRANE
NCDO2118_RS12030	Unknown Function 2461592:2462038 reverse MW:16695	8	5	44.6595	S	Function unknown	Poorly characterized	CYTOPLASMIC
NCDO2118_RS08135	Unknown Function 1699539:1699721 reverse MW:6622	5	4	43.1437	S	Function unknown	Poorly characterized	CYTOPLASMIC
NCDO2118_RS11400	translation initiation factor IF-1 2338563:2338781 reverse MW:8177	9	7	41.6137	J	Translation, ribosomal structure and biogenesis	Information storage and processing	CYTOPLASMIC
NCDO2118_RS02310	Unknown Function 451965:452156 reverse MW:7454	7	4	37.9287	S	Function unknown	Poorly characterized	CYTOPLASMIC
NCDO2118_RS08915	transketolase 1842343:1844319 reverse MW:71694	49	30	366.17	G	Carbohydrate transport and metabolism	Metabolism	CYTOPLASMIC
NCDO2118_RS11475	50S ribosomal protein L29 2347272:2347481 reverse MW:7859	25	20	117.694	J	Translation, ribosomal structure and biogenesis	Information storage and processing	CYTOPLASMIC
NCDO2118_RS03735	ArsR family transcriptional regulator 741727:742602 forward MW:34414	10	4	60.5122	K	Transcription	Information storage and processing	CYTOPLASMIC
NCDO2118_RS07955	hypoxanthine phosphoribosyltransferase 1665988:1666530 reverse MW:20296	12	11	79.9375	F	Nucleotide transport and metabolism	Metabolism	CYTOPLASMIC
NCDO2118_RS02840	amino acid ABC transporter substrate-binding protein 550776:551597 forward MW:29018	12	7	64.8282	ET	Amino acid transport and metabolism	Metabolism	PSE
NCDO2118_RS10260	polynucleotide phosphorylase 2118733:2121054 reverse MW:84535	44	25	321.12	J	Translation, ribosomal structure and biogenesis	Information storage and processing	CYTOPLASMIC
NCDO2118_RS10140	Unknown Function 2094792:2095235 reverse MW:16229	6	4	42.311	S	Function unknown	Poorly characterized	PSE
NCDO2118_RS10310	cell division protein 2132140:2132931 reverse MW:30484	3	3	15.8904	S	Function unknown	Poorly characterized	CYTOPLASMIC
NCDO2118_RS02145	gamma-aminobutyrate permease 416710:418143 forward MW:51969	8	5	47.0748	E	Amino acid transport and metabolism	Metabolism	MEMBRANE
NCDO2118_RS09050	catabolite control protein A 1872933:1873931 reverse MW:36603	25	19	208.536	K	Transcription	Information storage and processing	CYTOPLASMIC
NCDO2118_RS01400	enolase 272790:274079 forward MW:46883	50	30	325.752	G	Carbohydrate transport and metabolism	Metabolism	CYTOPLASMIC
NCDO2118_RS06820	Unknown Function 1412042:1412281 reverse MW:8932	2	2	25.1061	S	Function unknown	Poorly characterized	MEMBRANE
NCDO2118_RS05805	thiamine biosynthesis protein ApbE 1160338:1161423 forward MW:39662	10	5	48.4912	H	Coenzyme transport and metabolism	Metabolism	PSE
NCDO2118_RS02070	GTPase Era 401978:402889 forward MW:34737	7	2	50.7402	R	General function prediction only	Poorly characterized	CYTOPLASMIC
NCDO2118_RS04890	purine nucleoside phosphorylase 995023:995727 forward MW:25393	25	21	133.871	F	Nucleotide transport and metabolism	Metabolism	CYTOPLASMIC
NCDO2118_RS00865	PTS cellobiose transporter subunit IIC 169818:171302 forward MW:52766	7	6	30.0476	G	Carbohydrate transport and metabolism	Metabolism	MEMBRANE
NCDO2118_RS07495	cytidine deaminase 1560122:1560514 reverse MW:14152	2	2	13.934	F	Nucleotide transport and metabolism	Metabolism	CYTOPLASMIC
NCDO2118_RS02225	transglycosylase 435798:438203 forward MW:86979	18	15	99.4621	M	Cell wall/membrane/envelope biogenesis	Cellular processes and sinaling	PSE
NCDO2118_RS01920	methionine import ATP-binding protein MetN 368243:369349 forward MW:41090	13	6	91.466	P	Inorganic ion transport and metabolism	Metabolism	CYTOPLASMIC
NCDO2118_RS11520	30S ribosomal protein S10 2351798:2352106 reverse MW:11741	18	14	129.692	J	Translation, ribosomal structure and biogenesis	Information storage and processing	CYTOPLASMIC
NCDO2118_RS11385	30S ribosomal protein S11 2337606:2337989 reverse MW:13287	5	3	45.3926	J	Translation, ribosomal structure and biogenesis	Information storage and processing	CYTOPLASMIC
NCDO2118_RS00615	aldo/keto reductase 116558:117469 forward MW:33891	11	7	67.177	R	General function prediction only	Poorly characterized	CYTOPLASMIC
NCDO2118_RS06745	50S ribosomal protein L7/L12 1399706:1400071 reverse MW:12422	43	31	207.866	J	Translation, ribosomal structure and biogenesis	Information storage and processing	CYTOPLASMIC
NCDO2118_RS04310	NADH dehydrogenase 867106:869109 forward MW:74204	45	32	292.272	C	Energy production and conversion	Metabolism	PSE
NCDO2118_RS02415	ABC transporter permease 477524:478402 forward MW:32249	6	4	34.5315	S	Function unknown	Poorly characterized	MEMBRANE
NCDO2118_RS11690	DNA alkylation repair protein 2384883:2385581 reverse MW:27645	2	2	10.3604	L	Replication, recombination and repair	Information storage and processing	CYTOPLASMIC
NCDO2118_RS07770	fructokinase 1615393:1616268 reverse MW:31266	11	10	66.0411	KG	Transcription	Information storage and processing	CYTOPLASMIC
NCDO2118_RS04120	Unknown Function 824847:825086 forward MW:8549	29	16	106.844	S	Function unknown	Poorly characterized	CYTOPLASMIC
NCDO2118_RS11560	penicillin-binding protein 2A 2358875:2361106 reverse MW:82003	8	6	39.3781	M	Cell wall/membrane/envelope biogenesis	Cellular processes and sinaling	PSE
NCDO2118_RS09855	adapter protein MecA 2038571:2039272 reverse MW:27077	8	7	40.7065	OTN	Posttranslational modification, protein turnover, chaperones	Cellular processes and sinaling	CYTOPLASMIC
NCDO2118_RS02890	phosphopantothenoylcysteine decarboxylase 559283:559819 reverse MW:19419	11	8	103.713	H	Coenzyme transport and metabolism	Metabolism	CYTOPLASMIC
NCDO2118_RS00735	exopolysaccharide biosynthesis protein 144762:145652 forward MW:32774	9	3	46.8891	G	Carbohydrate transport and metabolism	Metabolism	PSE
NCDO2118_RS12310	rod shape-determining protein MreC 2505463:2506338 reverse MW:31416	8	5	69.4929	M	Cell wall/membrane/envelope biogenesis	Cellular processes and sinaling	SECRETED
NCDO2118_RS11865	glucose-6-phosphate isomerase 2426559:2427905 reverse MW:49595	32	22	244.93	G	Carbohydrate transport and metabolism	Metabolism	CYTOPLASMIC
NCDO2118_RS00800	transcriptional regulator 156204:156992 forward MW:29096	27	20	171.686	K	Transcription	Information storage and processing	CYTOPLASMIC
NCDO2118_RS10345	rRNA methyltransferase 2138305:2139033 reverse MW:26524	18	11	120.037	J	Translation, ribosomal structure and biogenesis	Information storage and processing	CYTOPLASMIC
NCDO2118_RS02425	phosphoglucosamine mutase 479397:480755 forward MW:48472	13	7	107.497	G	Carbohydrate transport and metabolism	Metabolism	CYTOPLASMIC
NCDO2118_RS07310	virion core protein 1523893:1525104 forward MW:44046	11	7	72.6569	S	Function unknown	Poorly characterized	CYTOPLASMIC
NCDO2118_RS10240	cysteinyl-tRNA synthetase 2115082:2116428 reverse MW:51021	23	20	122.047	J	Translation, ribosomal structure and biogenesis	Information storage and processing	CYTOPLASMIC
NCDO2118_RS02280	PhoP family transcriptional regulator 447353:448054 reverse MW:26765	41	26	227.392	TK	Signal transduction mechanisms	Cellular processes and sinaling	CYTOPLASMIC
NCDO2118_RS00225	2-oxoisovalerate dehydrogenase subunit beta 44596:45576 reverse MW:35210	26	16	174.36	C	Energy production and conversion	Metabolism	CYTOPLASMIC
NCDO2118_RS10795	aspartyl-tRNA synthetase 2220337:2222109 reverse MW:66589	55	39	410.253	J	Translation, ribosomal structure and biogenesis	Information storage and processing	CYTOPLASMIC
NCDO2118_RS09575	exodeoxyribonuclease V subunit alpha 1981903:1984407 reverse MW:92932	7	3	36.8772	L	Replication, recombination and repair	Information storage and processing	CYTOPLASMIC
NCDO2118_RS02160	lysyl-tRNA synthetase 420143:421627 reverse MW:56560	47	35	327.279	J	Translation, ribosomal structure and biogenesis	Information storage and processing	CYTOPLASMIC
NCDO2118_RS10155	hemolysin 2098465:2099757 reverse MW:48502	7	6	40.6583	R	General function prediction only	Poorly characterized	PSE
NCDO2118_RS10125	asparaginyl-tRNA synthase 2091915:2093258 reverse MW:50884	28	15	221.471	J	Translation, ribosomal structure and biogenesis	Information storage and processing	CYTOPLASMIC
NCDO2118_RS09550	lactate utilization protein C 1978078:1978761 forward MW:25108	8	5	56.2432	S	Function unknown	Poorly characterized	CYTOPLASMIC
NCDO2118_RS11875	Unknown Function 2428789:2429634 reverse MW:30324	14	7	90.4447	MG	Cell wall/membrane/envelope biogenesis	Cellular processes and sinaling	CYTOPLASMIC
NCDO2118_RS10745	pyridoxamine 5'-phosphate oxidase 2212987:2213484 reverse MW:18995	4	1	32.0527	R	General function prediction only	Poorly characterized	CYTOPLASMIC
NCDO2118_RS01170	uracil-DNA glycosylase 227815:228474 forward MW:24629	13	8	74.0118	L	Replication, recombination and repair	Information storage and processing	CYTOPLASMIC
NCDO2118_RS00755	queuine tRNA-ribosyltransferase 147545:148693 reverse MW:43343	5	3	28.771	J	Translation, ribosomal structure and biogenesis	Information storage and processing	CYTOPLASMIC
NCDO2118_RS00360	acetyl transferase 70343:70831 reverse MW:18368	5	1	30.0922	KR	Transcription	Information storage and processing	CYTOPLASMIC
NCDO2118_RS07235	heptaprenyl diphosphate synthase subunit II 1508938:1509897 forward MW:35699	7	5	38.2231	H	Coenzyme transport and metabolism	Metabolism	CYTOPLASMIC
NCDO2118_RS04455	ATPase 899908:901986 reverse MW:75738	10	7	59.0178	P	Inorganic ion transport and metabolism	Metabolism	MEMBRANE
NCDO2118_RS09760	acetyltransferase 2021231:2021794 reverse MW:21644	7	2	45.3086	M	Cell wall/membrane/envelope biogenesis	Cellular processes and sinaling	CYTOPLASMIC
NCDO2118_RS09535	haloacid dehalogenase 1974802:1975638 forward MW:32169	7	4	49.403	R	General function prediction only	Poorly characterized	CYTOPLASMIC
NCDO2118_RS10165	tyrosine phosphatase 2100970:2101716 reverse MW:28235	8	7	43.0816	T	Signal transduction mechanisms	Cellular processes and sinaling	CYTOPLASMIC
NCDO2118_RS02435	PTS sugar transporter subunit IIA 481658:482143 forward MW:17249	25	18	152.041	G	Carbohydrate transport and metabolism	Metabolism	CYTOPLASMIC
NCDO2118_RS10705	transcriptional regulator 2206004:2206543 forward MW:21393	18	15	132.935	K	Transcription	Information storage and processing	CYTOPLASMIC
NCDO2118_RS11920	RNA methyltransferase 2436770:2438311 reverse MW:58935	5	4	26.5225	J	Translation, ribosomal structure and biogenesis	Information storage and processing	CYTOPLASMIC
NCDO2118_RS03435	sucrose-6-phosphate hydrolase 672756:674174 reverse MW:54461	24	14	138.123	G	Carbohydrate transport and metabolism	Metabolism	CYTOPLASMIC
NCDO2118_RS07800	lacto-N-biosidase 1623844:1624821 reverse MW:37677	21	13	111.897	G	Carbohydrate transport and metabolism	Metabolism	CYTOPLASMIC
NCDO2118_RS04110	cystathionine beta-lyase 822341:823483 forward MW:40938	15	7	109.284	E	Amino acid transport and metabolism	Metabolism	CYTOPLASMIC
NCDO2118_RS03885	haloacid dehalogenase 775604:776992 forward MW:51538	10	5	70.9262	R	General function prediction only	Poorly characterized	CYTOPLASMIC
NCDO2118_RS02580	DNA-binding protein HU 509741:510016 forward MW:9676	58	43	162.269	L	Replication, recombination and repair	Information storage and processing	CYTOPLASMIC
NCDO2118_RS07490	membrane protein 1558811:1559863 reverse MW:36638	42	22	293.606	R	General function prediction only	Poorly characterized	PSE
NCDO2118_RS11995	30S ribosomal protein S6 2454752:2455045 reverse MW:11248	18	13	90.6725	J	Translation, ribosomal structure and biogenesis	Information storage and processing	CYTOPLASMIC
NCDO2118_RS01095	family 25 glycosyl hydrolase 214606:215988 reverse MW:50637	28	18	205.056	G	General function prediction only	Poorly characterized	SECRETED
NCDO2118_RS11045	uridylate kinase 2268220:2268936 reverse MW:25677	17	10	104.609	F	Nucleotide transport and metabolism	Metabolism	CYTOPLASMIC
NCDO2118_RS08235	glucosamine-6-phosphate deaminase 1718723:1719430 reverse MW:25621	15	5	86.0098	G	Carbohydrate transport and metabolism	Metabolism	CYTOPLASMIC
NCDO2118_RS06810	NTP phosphatase 1410466:1411071 reverse MW:22342	4	4	35.8205	F	Nucleotide transport and metabolism	Metabolism	CYTOPLASMIC
NCDO2118_RS10285	cysteine desulfurase 2125756:2126100 forward MW:13120	30	18	159.817	R	General function prediction only	Poorly characterized	CYTOPLASMIC
NCDO2118_RS01045	glycosyltransferase 205511:206236 forward MW:27265	6	4	38.3686	M	Cell wall/membrane/envelope biogenesis	Cellular processes and sinaling	CYTOPLASMIC
NCDO2118_RS10800	diadenosine polyphosphate hydrolase 2222170:2222538 reverse MW:13864	2	1	9.6532	FGR	Nucleotide transport and metabolism	Metabolism	CYTOPLASMIC
NCDO2118_RS04535	penicillin-binding protein 2X 914884:917175 forward MW:83460	27	19	140.146	M	Cell wall/membrane/envelope biogenesis	Cellular processes and sinaling	PSE
NCDO2118_RS11700	serine protease 2386455:2387681 forward MW:41638	10	5	65.8914	O	Posttranslational modification, protein turnover, chaperones	Cellular processes and sinaling	SECRETED
NCDO2118_RS04115	cysteine synthase 823698:824618 forward MW:32584	9	7	67.9898	E	Amino acid transport and metabolism	Metabolism	CYTOPLASMIC
NCDO2118_RS11600	MarR family transcriptional regulator 2366653:2367090 reverse MW:16366	3	3	23.2805	K	Transcription	Information storage and processing	CYTOPLASMIC
NCDO2118_RS02875	protein translocase component YidC 556685:557647 reverse MW:35627	11	11	70.7657	U	Intracellular trafficking, secretion, and vesicular transport	Cellular processes and sinaling	MEMBRANE
NCDO2118_RS06030	homoserine dehydrogenase 1205394:1206680 forward MW:46921	6	4	46.2597	E	Amino acid transport and metabolism	Metabolism	CYTOPLASMIC
NCDO2118_RS02525	Unknown Function 498337:499209 reverse MW:33431	12	10	72.4513	S	Function unknown	Poorly characterized	MEMBRANE
NCDO2118_RS02060	peptide chain release factor 3 398137:399708 forward MW:59521	27	16	165.814	J	Translation, ribosomal structure and biogenesis	Information storage and processing	CYTOPLASMIC
NCDO2118_RS09730	esterase 2014370:2015146 reverse MW:29646	8	5	44.4695	R	General function prediction only	Poorly characterized	CYTOPLASMIC
NCDO2118_RS07570	GntR family transcriptional regulator 1572824:1573444 reverse MW:23055	6	3	36.7998	P	Inorganic ion transport and metabolism	Metabolism	CYTOPLASMIC
NCDO2118_RS09095	hydrolase 1883915:1884700 forward MW:29129	5	5	39.5185	R	General function prediction only	Poorly characterized	CYTOPLASMIC
NCDO2118_RS09840	Fe-S cluster assembly protein SufD 2034898:2036154 reverse MW:45464	10	6	53.7358	O	Posttranslational modification, protein turnover, chaperones	Cellular processes and sinaling	CYTOPLASMIC
NCDO2118_RS04380	dipeptidase PepV 885658:887076 forward MW:51896	31	20	221.346	E	Amino acid transport and metabolism	Metabolism	CYTOPLASMIC
NCDO2118_RS01945	transcriptional regulator 373426:373719 forward MW:11419	3	3	29.6963	K	Transcription	Information storage and processing	CYTOPLASMIC
NCDO2118_RS02850	3-hydroxyacyl-ACP dehydratase 552795:553250 reverse MW:16796	5	3	33.1179	I	Lipid transport and metabolism	Metabolism	CYTOPLASMIC
NCDO2118_RS03125	general stress protein 599296:599715 forward MW:14814	4	2	40.6758	R	General function prediction only	Poorly characterized	MEMBRANE
NCDO2118_RS05850	3-demethylubiquinone-9 3-methyltransferase 1171598:1172056 forward MW:17047	6	3	63.5086	S	Function unknown	Poorly characterized	CYTOPLASMIC
NCDO2118_RS09315	taurine ABC transporter ATP-binding protein 1929169:1929966 reverse MW:29815	9	6	79.9183	P	Inorganic ion transport and metabolism	Metabolism	CYTOPLASMIC
NCDO2118_RS00410	D-aminoacyl-tRNA deacylase 80338:80793 forward MW:16532	3	2	15.8079	J	Translation, ribosomal structure and biogenesis	Information storage and processing	CYTOPLASMIC
NCDO2118_RS02895	phosphopantothenate--cysteine ligase 559812:560507 reverse MW:26083	9	5	61.9453	H	Coenzyme transport and metabolism	Metabolism	CYTOPLASMIC
NCDO2118_RS00590	transcriptional regulator 113195:113770 forward MW:22099	6	4	38.031	K	Transcription	Information storage and processing	CYTOPLASMIC
NCDO2118_RS07335	glutathione peroxidase 1531693:1532166 reverse MW:17993	11	8	73.1097	O	Posttranslational modification, protein turnover, chaperones	Cellular processes and sinaling	CYTOPLASMIC
NCDO2118_RS05400	peptide chain release factor 2 1078650:1079747 forward MW:41570	27	19	168.463	J	Translation, ribosomal structure and biogenesis	Information storage and processing	CYTOPLASMIC
NCDO2118_RS11495	30S ribosomal protein S19 2348927:2349205 reverse MW:10570	5	3	44.7895	J	Translation, ribosomal structure and biogenesis	Information storage and processing	CYTOPLASMIC
NCDO2118_RS02055	peptide ABC transporter substrate-binding protein 396966:397907 forward MW:35015	9	6	43.7395	E	Amino acid transport and metabolism	Metabolism	CYTOPLASMIC
NCDO2118_RS07110	manganese ABC transporter ATP-binding protein 1480622:1481335 reverse MW:26756	18	10	115.796	P	Inorganic ion transport and metabolism	Metabolism	CYTOPLASMIC
NCDO2118_RS04290	6-phospho-beta-glucosidase 862634:863995 forward MW:52770	9	3	41.6929	G	Carbohydrate transport and metabolism	Metabolism	CYTOPLASMIC
NCDO2118_RS12385	glyceraldehyde-3-phosphate dehydrogenase 2522616:2523626 reverse MW:35819	66	54	302.826	G	Carbohydrate transport and metabolism	Metabolism	CYTOPLASMIC
NCDO2118_RS10385	5'-methylthioadenosine/S-adenosylhomocysteine nucleosidase 2146249:2146929 reverse MW:24312	7	4	41.6485	F	Nucleotide transport and metabolism	Metabolism	CYTOPLASMIC
NCDO2118_RS09015	3-dehydroquinate dehydratase 1866933:1867613 reverse MW:25974	7	4	51.053	E	Amino acid transport and metabolism	Metabolism	CYTOPLASMIC
NCDO2118_RS00020	ATP-dependent helicase 6639:10250 forward MW:138860	11	3	69.9796	L	Replication, recombination and repair	Information storage and processing	CYTOPLASMIC
NCDO2118_RS05590	dihydroorotase 1117123:1118394 forward MW:45683	9	8	68.0259	F	Nucleotide transport and metabolism	Metabolism	CYTOPLASMIC
NCDO2118_RS09475	phosphate ABC transporter substrate-binding protein 1959675:1960526 reverse MW:30489	13	8	87.6019	P	Inorganic ion transport and metabolism	Metabolism	PSE
NCDO2118_RS03060	23S rRNA methyltransferase 588874:589632 forward MW:27387	15	10	92.8604	J	Translation, ribosomal structure and biogenesis	Information storage and processing	CYTOPLASMIC
NCDO2118_RS04185	NADH-flavin reductase 835385:836017 forward MW:23161	3	2	25.7772	R	General function prediction only	Poorly characterized	CYTOPLASMIC
NCDO2118_RS03225	Unknown Function 621811:622479 forward MW:25679	14	8	106.748	S	Function unknown	Poorly characterized	CYTOPLASMIC
NCDO2118_RS04665	LytR family transcriptional regulator 944979:946205 partial 3' forward MW:44362	17	7	81.9936	K	Transcription	Information storage and processing	PSE
NCDO2118_RS09385	regulator 1944193:1944576 forward MW:14277	2	1	17.5693	S	Function unknown	Poorly characterized	MEMBRANE
NCDO2118_RS06945	9-O-acetylesterase 1443980:1445827 reverse MW:71386	6	5	31.8557	R	General function prediction only	Poorly characterized	CYTOPLASMIC
NCDO2118_RS11660	NADH oxidase 2377974:2379305 reverse MW:49584	6	4	33.9513	R	General function prediction only	Poorly characterized	CYTOPLASMIC
NCDO2118_RS11680	UDP pyrophosphate synthase 2383349:2384083 reverse MW:27916	12	8	81.2096	I	Lipid transport and metabolism	Metabolism	CYTOPLASMIC
NCDO2118_RS02680	UDP-N-acetylglucosamine 1-carboxyvinyltransferase 526488:527774 forward MW:45834	22	14	145.439	M	Cell wall/membrane/envelope biogenesis	Cellular processes and sinaling	CYTOPLASMIC
NCDO2118_RS08445	PhoB family transcriptional regulator 1768336:1769028 reverse MW:26670	29	23	248.854	TK	Signal transduction mechanisms	Cellular processes and sinaling	CYTOPLASMIC
NCDO2118_RS05150	Unknown Function 1024615:1029537 forward MW:176584	14	4	62.4531	S	Function unknown	Poorly characterized	CYTOPLASMIC
NCDO2118_RS09640	haloacid dehalogenase 1996251:1996847 reverse MW:23013	12	9	75.2272	R	General function prediction only	Poorly characterized	CYTOPLASMIC
NCDO2118_RS03845	naphthoate synthase 766182:767024 reverse MW:30880	18	11	107.067	H	Coenzyme transport and metabolism	Metabolism	CYTOPLASMIC
NCDO2118_RS00205	aminotransferase A 39007:40182 forward MW:43199	25	14	196.315	E	Amino acid transport and metabolism	Metabolism	CYTOPLASMIC
NCDO2118_RS00820	aspartyl/glutamyl-tRNA(Asn/Gln) amidotransferase subunit B 160028:161461 forward MW:53425	54	32	362.956	J	Translation, ribosomal structure and biogenesis	Information storage and processing	CYTOPLASMIC
NCDO2118_RS02445	trehalose 6-phosphate phosphorylase 483913:486222 forward MW:87283	46	23	298.147	G	Carbohydrate transport and metabolism	Metabolism	CYTOPLASMIC
NCDO2118_RS10305	cell division protein DivIVA 2131151:2132083 reverse MW:35133	38	32	244.793	D	Cell cycle control, cell division, chromosome partitioning	Cellular processes and sinaling	CYTOPLASMIC
NCDO2118_RS09620	ABC transporter permease 1991614:1993614 reverse MW:74991	6	3	35.9618	V	Defense mechanisms	Cellular processes and sinaling	PSE
NCDO2118_RS11155	carbamate kinase 2289218:2290162 reverse MW:34059	38	25	271.703	E	Amino acid transport and metabolism	Metabolism	CYTOPLASMIC
NCDO2118_RS09455	phosphate import ATP-binding protein PstB 1 1955968:1956729 reverse MW:28165	16	8	98.9479	P	Inorganic ion transport and metabolism	Metabolism	CYTOPLASMIC
NCDO2118_RS04100	acetyl-CoA carboxylase carboxyltransferase subunit beta 820558:821424 forward MW:31788	22	14	145.773	I	Lipid transport and metabolism	Metabolism	CYTOPLASMIC
NCDO2118_RS11505	50S ribosomal protein L23 2350211:2350504 reverse MW:10743	36	26	186.48	J	Translation, ribosomal structure and biogenesis	Information storage and processing	CYTOPLASMIC
NCDO2118_RS02020	D-alanine--D-alanine ligase 387668:388717 forward MW:38737	20	13	146.929	M	Cell wall/membrane/envelope biogenesis	Cellular processes and sinaling	CYTOPLASMIC
NCDO2118_RS09500	foldase 1966090:1967016 reverse MW:33814	19	9	133.02	O	Posttranslational modification, protein turnover, chaperones	Cellular processes and sinaling	PSE
NCDO2118_RS05735	nicotinic acid mononucleotide adenylyltransferase 1142596:1143183 reverse MW:22582	3	2	23.5598	H	Coenzyme transport and metabolism	Metabolism	CYTOPLASMIC
NCDO2118_RS00965	50S ribosomal protein L28 190106:190300 reverse MW:7173	16	13	59.9601	J	Translation, ribosomal structure and biogenesis	Information storage and processing	CYTOPLASMIC
NCDO2118_RS09845	Fe-S cluster assembly ATPase SufC 2036292:2037062 reverse MW:28425	5	4	49.0421	O	Posttranslational modification, protein turnover, chaperones	Cellular processes and sinaling	CYTOPLASMIC
NCDO2118_RS00525	pyruvate kinase 100735:101766 reverse MW:39085	8	4	58.2898	G	Carbohydrate transport and metabolism	Metabolism	CYTOPLASMIC
NCDO2118_RS04025	transcription termination factor NusA 805555:806703 forward MW:42874	48	33	329.12	K	Transcription	Information storage and processing	CYTOPLASMIC
NCDO2118_RS10990	Unknown Function 2261140:2261361 forward MW:8453	9	6	79.8438	S	Function unknown	Poorly characterized	CYTOPLASMIC
NCDO2118_RS04095	acetyl-CoA carboxylase biotin carboxylase 819105:820472 forward MW:49513	29	21	178.966	I	Lipid transport and metabolism	Metabolism	CYTOPLASMIC
NCDO2118_RS02560	fatty acid-binding protein DegV 506073:506909 forward MW:30695	19	17	149.331	S	Function unknown	Poorly characterized	CYTOPLASMIC
NCDO2118_RS03380	Unknown Function 658793:659323 forward MW:20971	6	4	43.6677	S	Function unknown	Poorly characterized	MEMBRANE
NCDO2118_RS04715	2,3-butanediol dehydrogenase 953319:954389 forward MW:37860	21	9	143.824	ER	Amino acid transport and metabolism	Metabolism	CYTOPLASMIC
NCDO2118_RS09820	Fe-S cluster assembly protein SufB 2030977:2032389 reverse MW:52553	20	9	121.868	O	Posttranslational modification, protein turnover, chaperones	Cellular processes and sinaling	CYTOPLASMIC
NCDO2118_RS01255	dihydroxyacetone kinase 243306:243884 forward MW:20566	16	11	113.871	G	Carbohydrate transport and metabolism	Metabolism	CYTOPLASMIC
NCDO2118_RS05295	D-alanyl-D-alanine carboxypeptidase 1055883:1056629 forward MW:27476	3	2	17.5793	M	Cell wall/membrane/envelope biogenesis	Cellular processes and sinaling	PSE
NCDO2118_RS00435	transcriptional regulator 84787:85278 reverse MW:18694	6	3	29.0744	K	Transcription	Information storage and processing	CYTOPLASMIC
NCDO2118_RS12500	elongation factor G 2541509:2543638 reverse MW:77956	81	57	609.748	J	Translation, ribosomal structure and biogenesis	Information storage and processing	CYTOPLASMIC
NCDO2118_RS04060	3-oxoacyl-ACP synthase 813018:813995 forward MW:34877	9	8	45.9597	I	Lipid transport and metabolism	Metabolism	CYTOPLASMIC
NCDO2118_RS05185	arsenate reductase 1036466:1036870 forward MW:15348	5	4	23.2053	T	Signal transduction mechanisms	Cellular processes and sinaling	CYTOPLASMIC
NCDO2118_RS09635	chorismate synthase 1995054:1996220 reverse MW:42677	25	13	179.653	E	Amino acid transport and metabolism	Metabolism	CYTOPLASMIC
NCDO2118_RS04905	endonuclease 998110:999165 reverse MW:40322	28	15	176.279	S	Function unknown	Poorly characterized	CYTOPLASMIC
NCDO2118_RS01105	GTPase 218050:219204 forward MW:42666	11	7	62.7271	R	General function prediction only	Poorly characterized	CYTOPLASMIC
NCDO2118_RS00795	aminotransferase AlaT 154837:156051 forward MW:45529	26	19	165.764	E	Amino acid transport and metabolism	Metabolism	CYTOPLASMIC
NCDO2118_RS00455	phosphocarrier protein HPr 90145:90411 forward MW:9142	3	3	28.0064	G	Carbohydrate transport and metabolism	Metabolism	CYTOPLASMIC
NCDO2118_RS04075	3-ketoacyl-ACP reductase 815675:816406 forward MW:25640	19	10	132.012	IQR	Lipid transport and metabolism	Metabolism	CYTOPLASMIC
NCDO2118_RS10900	galactokinase 2243090:2244289 reverse MW:43825	63	42	403.707	G	Carbohydrate transport and metabolism	Metabolism	CYTOPLASMIC
NCDO2118_RS12340	Unknown Function 2510367:2510570 reverse MW:7622	7	7	51.8594	S	Function unknown	Poorly characterized	CYTOPLASMIC
NCDO2118_RS01135	GNAT family acetyltransferase 222739:223164 forward MW:16111	4	3	24.2203	R	General function prediction only	Poorly characterized	CYTOPLASMIC
NCDO2118_RS04170	Unknown Function 833381:833620 forward MW:8728	9	7	68.1351	S	Function unknown	Poorly characterized	CYTOPLASMIC
NCDO2118_RS08880	ribonuclease J 1835111:1836823 reverse MW:63538	27	19	159.737	R	General function prediction only	Poorly characterized	CYTOPLASMIC
NCDO2118_RS01855	UDP-N-acetylglucosamine 1-carboxyvinyltransferase 2 356555:357820 forward MW:44918	15	7	87.7632	M	Cell wall/membrane/envelope biogenesis	Cellular processes and sinaling	CYTOPLASMIC
NCDO2118_RS02140	peptidylprolyl isomerase 415569:416399 reverse MW:29945	8	3	31.1196	O	Posttranslational modification, protein turnover, chaperones	Cellular processes and sinaling	PSE
NCDO2118_RS02430	GntR family transcriptional regulator 480831:481547 reverse MW:27907	3	2	14.7448	K	Transcription	Information storage and processing	CYTOPLASMIC
NCDO2118_RS04105	acetyl-CoA carboxylase subunit alpha 821438:822211 forward MW:28278	13	9	98.5484	I	Lipid transport and metabolism	Metabolism	CYTOPLASMIC
NCDO2118_RS04265	ribose-phosphate pyrophosphokinase 1 855419:856393 forward MW:35529	23	16	202.508	FE	Nucleotide transport and metabolism	Metabolism	CYTOPLASMIC
NCDO2118_RS00900	5'-nucleotidase 176057:177400 forward MW:50585	5	2	38.8121	F	Nucleotide transport and metabolism	Metabolism	CYTOPLASMIC
NCDO2118_RS11075	GTP-binding protein 2273711:2275543 reverse MW:67885	53	37	355.423	T	Signal transduction mechanisms	Cellular processes and sinaling	CYTOPLASMIC
NCDO2118_RS08160	dipeptidase 1704638:1706062 reverse MW:53689	36	24	255.396	E	Amino acid transport and metabolism	Metabolism	CYTOPLASMIC
NCDO2118_RS05305	HrcA family transcriptional regulator 1057268:1058311 forward MW:39863	10	8	63.8621	K	Transcription	Information storage and processing	CYTOPLASMIC
NCDO2118_RS10895	peptidase S24 2241435:2242916 reverse MW:56591	10	8	94.6215	G	Carbohydrate transport and metabolism	Metabolism	CYTOPLASMIC
NCDO2118_RS05835	ATP-dependent DNA helicase PcrA 1168139:1170415 forward MW:85864	32	17	186.752	L	Replication, recombination and repair	Information storage and processing	CYTOPLASMIC
NCDO2118_RS06365	1-(5-phosphoribosyl)-5-[(5- phosphoribosylamino)methylideneamino] imidazole-4-carboxamide isomerase	7	3	36.0018	E	Amino acid transport and metabolism	Metabolism	CYTOPLASMIC
NCDO2118_RS07420	transcriptional regulator 1546920:1548050 reverse MW:43714	6	3	29.5791	E	Amino acid transport and metabolism	Metabolism	CYTOPLASMIC
NCDO2118_RS01890	prolyl-tRNA synthetase 362576:363052 reverse MW:17477	12	8	96.31	S	Function unknown	Poorly characterized	CYTOPLASMIC
NCDO2118_RS02180	LysR family transcriptional regulator 425254:426075 reverse MW:31356	5	2	26.9599	K	Transcription	Information storage and processing	CYTOPLASMIC
NCDO2118_RS02380	6-phospho-beta-glucosidase 466476:467912 forward MW:55011	15	8	96.024	G	Carbohydrate transport and metabolism	Metabolism	CYTOPLASMIC
NCDO2118_RS08195	16S rRNA-processing protein RimM 1711190:1711705 reverse MW:19671	2	1	10.3106	J	Translation, ribosomal structure and biogenesis	Information storage and processing	CYTOPLASMIC
NCDO2118_RS05410	cell division protein FtsX 1080759:1081694 forward MW:34670	8	7	48.1489	D	Cell cycle control, cell division, chromosome partitioning	Cellular processes and sinaling	PSE
NCDO2118_RS10720	adenylosuccinate synthetase 2208915:2210207 reverse MW:47326	29	23	246.723	F	Nucleotide transport and metabolism	Metabolism	CYTOPLASMIC
NCDO2118_RS02420	Unknown Function 478392:479351 forward MW:34599	10	6	67.6561	S	Function unknown	Poorly characterized	SECRETED
NCDO2118_RS09175	6-phospho-beta-glucosidase 1898696:1900129 reverse MW:54728	22	15	185.412	G	Carbohydrate transport and metabolism	Metabolism	CYTOPLASMIC
NCDO2118_RS06960	DNA methyltransferase 1448583:1449626 reverse MW:39406	3	3	17.185	L	Replication, recombination and repair	Information storage and processing	CYTOPLASMIC
NCDO2118_RS03330	formate acetyltransferase 643041:645404 forward MW:89122	96	63	630.765	C	Energy production and conversion	Metabolism	CYTOPLASMIC
NCDO2118_RS03905	phospholipase 780616:781482 reverse MW:31929	18	12	117.763	R	General function prediction only	Poorly characterized	CYTOPLASMIC
NCDO2118_RS12345	2-hydroxyglutaryl-CoA dehydratase 2510817:2515127 reverse MW:159760	34	19	175.899	I	Lipid transport and metabolism	Metabolism	CYTOPLASMIC
NCDO2118_RS01340	GTPase 261590:262243 forward MW:23744	10	7	51.611	S	Function unknown	Poorly characterized	PSE
NCDO2118_RS02620	aminotransferase V 514468:515613 forward MW:41801	9	6	59.01	E	Amino acid transport and metabolism	Metabolism	CYTOPLASMIC
NCDO2118_RS11665	prolyl-tRNA synthetase 2379321:2381171 reverse MW:69307	61	41	415.622	J	Translation, ribosomal structure and biogenesis	Information storage and processing	CYTOPLASMIC
NCDO2118_RS11055	acetate kinase 2269607:2270794 reverse MW:43060	19	10	107.272	C	Energy production and conversion	Metabolism	CYTOPLASMIC
NCDO2118_RS03045	3-phosphoglycerate dehydrogenase 586291:587487 forward MW:43736	11	4	81.9339	HE	Coenzyme transport and metabolism	Metabolism	CYTOPLASMIC
NCDO2118_RS04230	Unknown Function 848287:848697 forward MW:16030	6	5	40.3199	S	Function unknown	Poorly characterized	PSE
NCDO2118_RS03155	ATP-dependent helicase 605499:607424 forward MW:72681	36	21	208.924	L	Replication, recombination and repair	Information storage and processing	CYTOPLASMIC
NCDO2118_RS06445	alpha-acetolactate decarboxylase 1331046:1331756 forward MW:26353	10	6	89.6372	Q	Secondary metabolites biosynthesis, transport and catabolism	Metabolism	CYTOPLASMIC
NCDO2118_RS05405	cell division protein FtsE 1080074:1080766 forward MW:25800	15	12	105.658	D	Cell cycle control, cell division, chromosome partitioning	Cellular processes and sinaling	CYTOPLASMIC
NCDO2118_RS12290	carboxylate--amine ligase 2500167:2501393 reverse MW:47495	33	21	193.6	R	General function prediction only	Poorly characterized	CYTOPLASMIC
NCDO2118_RS10840	XRE family transcriptional regulator 2229448:2230344 reverse MW:31852	9	9	57.5818	S	Function unknown	Poorly characterized	PSE
NCDO2118_RS11710	1,2-diacylglycerol 3-glucosyltransferase 2388931:2390271 forward MW:50938	18	12	112.58	M	Cell wall/membrane/envelope biogenesis	Cellular processes and sinaling	CYTOPLASMIC
NCDO2118_RS06125	RNA methyltransferase 1224122:1225492 forward MW:51804	17	11	126.927	J	Translation, ribosomal structure and biogenesis	Information storage and processing	CYTOPLASMIC
NCDO2118_RS11790	alcohol dehydrogenase 2409140:2411851 forward MW:98193	92	73	653.726	C	Energy production and conversion	Metabolism	CYTOPLASMIC
NCDO2118_RS10925	transcriptional regulator 2249068:2250207 reverse MW:44107	3	2	13.5852	H	Coenzyme transport and metabolism	Metabolism	CYTOPLASMIC
NCDO2118_RS05785	elongation factor 4 1153353:1155176 forward MW:67704	53	28	351.179	M	Cell wall/membrane/envelope biogenesis	Cellular processes and sinaling	CYTOPLASMIC
NCDO2118_RS02820	glyceraldehyde-3-phosphate dehydrogenase 546103:547116 forward MW:36057	14	9	94.4056	G	Carbohydrate transport and metabolism	Metabolism	CYTOPLASMIC
NCDO2118_RS07220	UTP--glucose-1-phosphate uridylyltransferase 1507001:1507942 forward MW:34834	29	19	198.597	M	Cell wall/membrane/envelope biogenesis	Cellular processes and sinaling	CYTOPLASMIC
NCDO2118_RS05980	dihydrofolate reductase 1197476:1197982 forward MW:19666	6	4	36.5236	H	Coenzyme transport and metabolism	Metabolism	CYTOPLASMIC
NCDO2118_RS01470	Unknown Function 283679:284524 forward MW:32949	3	2	15.7828	S	Function unknown	Poorly characterized	MEMBRANE
NCDO2118_RS06725	hydroxyethylthiazole kinase 1393804:1394556 reverse MW:27296	4	1	26.9295	H	Coenzyme transport and metabolism	Metabolism	CYTOPLASMIC
NCDO2118_RS10835	CDP-diacylglycerol--glycerol-3-phosphate 3-phosphatidyltransferase 2228835:2229407 reverse MW:21332	4	3	15.9648	I	Lipid transport and metabolism	Metabolism	MEMBRANE
NCDO2118_RS05280	Unknown Function 1053208:1054545 forward MW:46772	29	23	157.515	S	Function unknown	Poorly characterized	CYTOPLASMIC
NCDO2118_RS07805	ABC transporter substrate-binding protein 1624899:1626350 reverse MW:52925	34	26	264.919	G	Carbohydrate transport and metabolism	Metabolism	PSE
NCDO2118_RS01730	Unknown Function 331214:331867 reverse MW:23853	6	6	34.7056	S	Function unknown	Poorly characterized	PSE
NCDO2118_RS03250	ribonuclease Z 624538:625461 forward MW:34015	2	2	14.594	R	General function prediction only	Poorly characterized	CYTOPLASMIC
NCDO2118_RS10775	Unknown Function 2217148:2217378 forward MW:8640	10	9	89.5968	S	Function unknown	Poorly characterized	CYTOPLASMIC
NCDO2118_RS04225	alkaline phosphatase 846028:848196 forward MW:81926	7	4	46.1958	M	Cell wall/membrane/envelope biogenesis	Cellular processes and sinaling	PSE
NCDO2118_RS11280	GNAT family acetyltransferase 2320334:2320828 forward MW:18491	7	5	46.263	KR	Transcription	Information storage and processing	CYTOPLASMIC
NCDO2118_RS10340	Unknown Function 2137323:2138192 reverse MW:31549	11	4	72.5913	S	Function unknown	Poorly characterized	CYTOPLASMIC
NCDO2118_RS07775	N-acetylmannosamine kinase 1616371:1617252 reverse MW:31637	14	9	119.791	KG	Transcription	Information storage and processing	CYTOPLASMIC
NCDO2118_RS08890	dihydrodipicolinate synthase 1837885:1838778 reverse MW:32218	9	4	59.044	EM	Amino acid transport and metabolism	Metabolism	CYTOPLASMIC
NCDO2118_RS11540	transcription termination/antitermination protein NusG 2355705:2356262 reverse MW:21110	17	12	140.7	K	Transcription	Information storage and processing	CYTOPLASMIC
NCDO2118_RS02835	excinuclease ABC subunit B 548514:550592 forward MW:79118	40	23	229.616	L	Replication, recombination and repair	Information storage and processing	CYTOPLASMIC
NCDO2118_RS05450	DNA polymerase III subunit epsilon 1089885:1090718 forward MW:32073	5	1	30.8224	L	Replication, recombination and repair	Information storage and processing	CYTOPLASMIC
NCDO2118_RS08455	50S ribosomal protein L31 type B 1769845:1770090 reverse MW:9336	19	9	123.325	J	Translation, ribosomal structure and biogenesis	Information storage and processing	CYTOPLASMIC
NCDO2118_RS10975	ABC transporter ATP-binding protein 2257853:2258623 reverse MW:28473	10	7	75.2201	V	Defense mechanisms	Cellular processes and sinaling	CYTOPLASMIC
NCDO2118_RS00385	50S ribosomal protein L11 methyltransferase 73983:74936 forward MW:34841	3	2	18.0013	J	Translation, ribosomal structure and biogenesis	Information storage and processing	CYTOPLASMIC
NCDO2118_RS11595	zinc ABC transporter substrate-binding protein 2365814:2366656 reverse MW:30684	19	9	109.832	P	Inorganic ion transport and metabolism	Metabolism	PSE
NCDO2118_RS04495	transcriptional regulator 908061:908507 forward MW:16871	10	8	60.5538	K	Transcription	Information storage and processing	CYTOPLASMIC
NCDO2118_RS06950	cytosine methyltransferase 1446221:1447183 partial 3' reverse MW:36536	12	4	58.7284	L	Replication, recombination and repair	Information storage and processing	CYTOPLASMIC
NCDO2118_RS04035	Unknown Function 807198:807503 forward MW:11070	8	5	51.5735	J	Translation, ribosomal structure and biogenesis	Information storage and processing	CYTOPLASMIC
NCDO2118_RS02675	inositol monophosphatase 525615:526394 forward MW:29532	19	10	104.167	G	Carbohydrate transport and metabolism	Metabolism	CYTOPLASMIC
NCDO2118_RS10935	protease 2251369:2252661 reverse MW:47882	17	10	106.681	O	Posttranslational modification, protein turnover, chaperones	Cellular processes and sinaling	CYTOPLASMIC
NCDO2118_RS01130	Unknown Function 222103:222693 forward MW:22454	3	3	22.9742	H	Coenzyme transport and metabolism	Metabolism	CYTOPLASMIC
NCDO2118_RS04775	transcriptional regulator 967960:968424 forward MW:17755	6	3	32.1356	K	Transcription	Information storage and processing	CYTOPLASMIC
NCDO2118_RS10425	16S rRNA methyltransferase 2153576:2154850 reverse MW:47877	20	12	113.748	J	Translation, ribosomal structure and biogenesis	Information storage and processing	CYTOPLASMIC
NCDO2118_RS10330	cell division protein FtsZ 2134508:2135761 reverse MW:43988	38	27	237.142	D	Cell cycle control, cell division, chromosome partitioning	Cellular processes and sinaling	CYTOPLASMIC
NCDO2118_RS02270	metallo-hydrolase 444935:445747 reverse MW:30538	3	1	20.1677	R	General function prediction only	Poorly characterized	CYTOPLASMIC
NCDO2118_RS12170	glutamine synthetase 2477388:2478728 reverse MW:49753	51	35	380.713	E	Amino acid transport and metabolism	Metabolism	CYTOPLASMIC
NCDO2118_RS04710	rod shape-determining protein RodA 951849:953093 forward MW:46514	3	3	16.1091	D	Cell cycle control, cell division, chromosome partitioning	Cellular processes and sinaling	MEMBRANE
NCDO2118_RS00010	DNA polymerase III subunit beta 2099:3241 forward MW:42264	18	13	137.789	L	Replication, recombination and repair	Information storage and processing	CYTOPLASMIC
NCDO2118_RS03025	Unknown Function 582246:582830 forward MW:21179	12	9	74.9736	J	Translation, ribosomal structure and biogenesis	Information storage and processing	CYTOPLASMIC
NCDO2118_RS04615	aromatic ring hydroxylating protein 932131:932463 forward MW:12471	11	9	60.61	R	General function prediction only	Poorly characterized	CYTOPLASMIC
NCDO2118_RS08905	transporter 1840759:1841622 reverse MW:30053	4	2	42.0259	G	Carbohydrate transport and metabolism	Metabolism	MEMBRANE
NCDO2118_RS03275	aminodeoxychorismate lyase 630101:631735 forward MW:60484	26	16	173.023	R	General function prediction only	Poorly characterized	PSE
NCDO2118_RS10320	cell division protein SepF 2133203:2133793 reverse MW:21869	9	5	53.5672	S	Function unknown	Poorly characterized	CYTOPLASMIC
NCDO2118_RS00975	glucose-1-phosphate thymidylyltransferase 191287:192156 forward MW:32131	15	11	77.039	M	Cell wall/membrane/envelope biogenesis	Cellular processes and sinaling	CYTOPLASMIC
NCDO2118_RS00545	thymidylate kinase 103751:104350 forward MW:23004	2	1	8.4418	F	Nucleotide transport and metabolism	Metabolism	CYTOPLASMIC
NCDO2118_RS09805	Unknown Function 2028932:2029225 forward MW:11482	2	1	18.9405	S	Function unknown	Poorly characterized	CYTOPLASMIC
NCDO2118_RS10660	RmuC family endonuclease 2196388:2197692 reverse MW:49415	26	16	153.236	S	Function unknown	Poorly characterized	MEMBRANE
NCDO2118_RS05615	Unknown Function 1121641:1122006 reverse MW:13564	6	5	68.5044	S	Function unknown	Poorly characterized	CYTOPLASMIC
NCDO2118_RS02395	DNA ligase 468841:470805 forward MW:72708	36	26	228.361	L	Replication, recombination and repair	Information storage and processing	CYTOPLASMIC
NCDO2118_RS01695	1,4-beta-xylanase 324089:325207 forward MW:41792	4	2	24.2241	G	Carbohydrate transport and metabolism	Metabolism	SECRETED
NCDO2118_RS11510	50S ribosomal protein L4 2350504:2351130 reverse MW:22305	20	14	131.505	J	Translation, ribosomal structure and biogenesis	Information storage and processing	CYTOPLASMIC
NCDO2118_RS04785	Unknown Function 969961:970680 forward MW:26895	21	11	153.053	S	Function unknown	Poorly characterized	MEMBRANE
NCDO2118_RS10265	Unknown Function 2121336:2122481 reverse MW:39930	46	31	290.272	S	Function unknown	Poorly characterized	PSE
NCDO2118_RS02230	glutamyl aminopeptidase 438261:439328 reverse MW:38367	15	9	141.078	G	Carbohydrate transport and metabolism	Metabolism	CYTOPLASMIC
NCDO2118_RS10530	fructose-bisphosphate aldolase 2174026:2174922 reverse MW:31989	50	35	310.075	G	Carbohydrate transport and metabolism	Metabolism	CYTOPLASMIC
NCDO2118_RS07360	Unknown Function 1537567:1538367 reverse MW:29298	9	3	47.76	S	Function unknown	Poorly characterized	CYTOPLASMIC
NCDO2118_RS10650	aldose 1-epimerase 2194016:2194885 reverse MW:33430	14	9	88.1888	G	Carbohydrate transport and metabolism	Metabolism	CYTOPLASMIC
NCDO2118_RS09910	UDP-N-acetylmuramoylalanyl-D-glutamate--2, 6-diaminopimelate ligase 2055411:2056862 forward MW:53899	17	9	87.7489	M	Cell wall/membrane/envelope biogenesis	Cellular processes and sinaling	CYTOPLASMIC
NCDO2118_RS03920	Unknown Function 782838:784802 forward MW:74031	28	13	168.406	T	Signal transduction mechanisms	Cellular processes and sinaling	PSE
NCDO2118_RS01655	ATPase AAA 316483:318015 reverse MW:59412	16	9	90.6138	R	General function prediction only	Poorly characterized	CYTOPLASMIC
NCDO2118_RS02125	GTP pyrophosphokinase 413188:413847 forward MW:25891	12	7	79.775	S	Function unknown	Poorly characterized	CYTOPLASMIC
NCDO2118_RS05535	glucosamine--fructose-6-phosphate aminotransferase 1107103:1108920 forward MW:65658	57	43	428.736	M	Cell wall/membrane/envelope biogenesis	Cellular processes and sinaling	CYTOPLASMIC
NCDO2118_RS06150	acetolactate synthase 1230435:1232099 forward MW:60765	18	9	116.428	EH	Amino acid transport and metabolism	Metabolism	CYTOPLASMIC
NCDO2118_RS09075	cell division protein 1879439:1879825 reverse MW:14979	9	4	52.6398	D	Cell cycle control, cell division, chromosome partitioning	Cellular processes and sinaling	CYTOPLASMIC
NCDO2118_RS09700	ATP synthase subunit gamma 2009588:2010457 reverse MW:31997	20	11	132.134	C	Energy production and conversion	Metabolism	CYTOPLASMIC
NCDO2118_RS07250	orotidine 5'-phosphate decarboxylase 1511092:1511805 reverse MW:26097	9	5	61.4009	F	Nucleotide transport and metabolism	Metabolism	CYTOPLASMIC
NCDO2118_RS04250	haloacid dehalogenase 852431:853240 forward MW:30244	13	9	84.0541	R	General function prediction only	Poorly characterized	CYTOPLASMIC
NCDO2118_RS03270	DNA-directed RNA polymerase subunit delta 629401:629964 forward MW:21338	7	4	37.9225	K	Transcription	Information storage and processing	CYTOPLASMIC
NCDO2118_RS05715	glycine--tRNA ligase subunit alpha 1137824:1138777 forward MW:36115	10	9	78.4358	J	Translation, ribosomal structure and biogenesis	Information storage and processing	CYTOPLASMIC
NCDO2118_RS06735	UDP-N-acetylglucosamine 2-epimerase 1397305:1398408 reverse MW:41526	10	7	69.953	M	Cell wall/membrane/envelope biogenesis	Cellular processes and sinaling	CYTOPLASMIC
NCDO2118_RS11380	DNA-directed RNA polymerase subunit alpha 2336620:2337558 reverse MW:34150	38	24	227.597	K	Transcription	Information storage and processing	CYTOPLASMIC
NCDO2118_RS01710	30S ribosomal protein S4 326391:327002 forward MW:23164	45	29	277.078	J	Translation, ribosomal structure and biogenesis	Information storage and processing	CYTOPLASMIC
NCDO2118_RS04720	acetoin reductase 954415:955176 forward MW:26910	22	18	183.557	IQR	Lipid transport and metabolism	Metabolism	CYTOPLASMIC
NCDO2118_RS00275	hydrolase 54690:55502 reverse MW:30441	19	9	131.109	R	General function prediction only	Poorly characterized	CYTOPLASMIC
NCDO2118_RS03280	transcription elongation factor GreA 631795:632268 forward MW:17387	25	15	148.708	K	Transcription	Information storage and processing	CYTOPLASMIC
NCDO2118_RS00605	RNA-binding protein 115170:116084 forward MW:33801	33	17	282.038	R	General function prediction only	Poorly characterized	CYTOPLASMIC
NCDO2118_RS00470	nucleoid-associated protein 92654:92953 reverse MW:11108	8	6	61.2695	S	Function unknown	Poorly characterized	CYTOPLASMIC
NCDO2118_RS06870	ribonuclease HII 1427020:1427796 reverse MW:28405	13	2	72.3661	L	Replication, recombination and repair	Information storage and processing	CYTOPLASMIC
NCDO2118_RS09045	ferredoxin--NADP reductase 1871829:1872794 reverse MW:35062	3	3	22.0641	O	Posttranslational modification, protein turnover, chaperones	Cellular processes and sinaling	CYTOPLASMIC
NCDO2118_RS04090	3-hydroxyacyl-ACP dehydratase 818277:818711 forward MW:15923	11	10	76.4505	I	Lipid transport and metabolism	Metabolism	CYTOPLASMIC
NCDO2118_RS10930	dehydrogenase 2250194:2251171 reverse MW:36569	12	6	81.5426	HE	Coenzyme transport and metabolism	Metabolism	CYTOPLASMIC
NCDO2118_RS05855	fumarate reductase 1172221:1173729 forward MW:52915	50	29	303.901	C	Energy production and conversion	Metabolism	PSE
NCDO2118_RS03950	NrdR family transcriptional regulator 788811:789257 forward MW:17374	4	2	18.5524	K	Transcription	Information storage and processing	CYTOPLASMIC
NCDO2118_RS11165	amino acid APC transporter 2291155:2292735 reverse MW:56458	4	2	24.7799	E	Amino acid transport and metabolism	Metabolism	MEMBRANE
NCDO2118_RS05460	DNA topoisomerase IV subunit A 1091439:1093913 forward MW:92778	23	13	129.345	L	Replication, recombination and repair	Information storage and processing	CYTOPLASMIC
NCDO2118_RS03050	phosphoserine phosphatase 587511:588161 forward MW:23458	3	2	28.4709	E	Amino acid transport and metabolism	Metabolism	CYTOPLASMIC
NCDO2118_RS03085	methionine aminopeptidase 593470:594324 forward MW:31781	13	9	72.9873	J	Translation, ribosomal structure and biogenesis	Information storage and processing	CYTOPLASMIC
NCDO2118_RS02515	CTP synthase 495644:497251 forward MW:59552	27	18	177.185	F	Nucleotide transport and metabolism	Metabolism	CYTOPLASMIC
NCDO2118_RS01020	ABC transporter ATP-binding protein 198561:199757 forward MW:44899	24	18	179.246	GM	Carbohydrate transport and metabolism	Metabolism	CYTOPLASMIC
NCDO2118_RS03895	flotillin 777487:778998 forward MW:53713	44	29	275.447	S	Function unknown	Poorly characterized	PSE
NCDO2118_RS07295	sugar ABC transporter substrate-binding protein 1520328:1521647 reverse MW:48477	26	14	153.621	G	Carbohydrate transport and metabolism	Metabolism	PSE
NCDO2118_RS08870	signal recognition particle protein 1830503:1832059 reverse MW:56892	42	30	285.975	U	Intracellular trafficking, secretion, and vesicular transport	Cellular processes and sinaling	CYTOPLASMIC
NCDO2118_RS05895	transcriptional regulator 1181878:1182729 forward MW:31713	10	6	62.9087	K	Transcription	Information storage and processing	CYTOPLASMIC
NCDO2118_RS12260	Unknown Function 2494813:2494992 forward MW:7042	7	5	63.0276	S	Function unknown	Poorly characterized	CYTOPLASMIC
NCDO2118_RS05940	acyl-ACP thioesterase 1190270:1191001 forward MW:28844	9	4	55.8377	I	Lipid transport and metabolism	Metabolism	CYTOPLASMIC
NCDO2118_RS12055	Unknown Function 2465378:2465572 reverse MW:7653	9	6	48.7464	S	Function unknown	Poorly characterized	CYTOPLASMIC
NCDO2118_RS10145	3'-5' exonuclease 2095370:2097745 reverse MW:89646	33	23	186.328	KL	Transcription	Information storage and processing	CYTOPLASMIC
NCDO2118_RS07165	heme ABC transporter ATP-binding protein 1494694:1496214 forward MW:55639	26	15	169.921	R	General function prediction only	Poorly characterized	CYTOPLASMIC
NCDO2118_RS02085	recombinase RecA 405745:406908 forward MW:41457	25	15	154.126	L	Replication, recombination and repair	Information storage and processing	CYTOPLASMIC
NCDO2118_RS11365	UDP-N-acetylmuramoyl-tripeptide--D-alanyl-D- alanine ligase 2334327:2335526 reverse MW:46459	10	6	76.9279	V	Defense mechanisms	Cellular processes and sinaling	CYTOPLASMIC
NCDO2118_RS00970	Unknown Function 190436:191095 forward MW:24447	9	8	57.9111	S	Function unknown	Poorly characterized	MEMBRANE
NCDO2118_RS07560	glycine/betaine ABC transporter permease 1569669:1571390 reverse MW:61938	22	7	133.844	E	Amino acid transport and metabolism	Metabolism	PSE
NCDO2118_RS11830	peptidase S16 2419851:2420879 reverse MW:37350	6	3	31.6041	T	Signal transduction mechanisms	Cellular processes and sinaling	PSE
NCDO2118_RS08305	LacI family transcriptional regulator 1737534:1738538 reverse MW:37966	17	7	102.852	K	Transcription	Information storage and processing	CYTOPLASMIC
NCDO2118_RS03430	LacI family transcriptional regulator 671803:672774 reverse MW:36215	12	9	73.3662	K	Transcription	Information storage and processing	CYTOPLASMIC
NCDO2118_RS09595	3-phosphoshikimate 1-carboxyvinyltransferase 1986353:1987645 reverse MW:45975	22	16	143.399	E	Amino acid transport and metabolism	Metabolism	CYTOPLASMIC
NCDO2118_RS03790	metal-dependent hydrolase 752838:753590 forward MW:27991	16	12	103.674	R	General function prediction only	Poorly characterized	CYTOPLASMIC
NCDO2118_RS12025	Unknown Function 2461231:2461503 forward MW:10777	7	6	53.7852	E	Amino acid transport and metabolism	Metabolism	CYTOPLASMIC
NCDO2118_RS10455	3-demethylubiquinone-9 3-methyltransferase 2157735:2158199 reverse MW:17672	7	5	48.998	S	Function unknown	Poorly characterized	CYTOPLASMIC
NCDO2118_RS11410	protein translocase subunit SecY 2339865:2341184 reverse MW:48456	8	4	41.9358	U	Intracellular trafficking, secretion, and vesicular transport	Cellular processes and sinaling	MEMBRANE
NCDO2118_RS03295	sigma-54 modulation protein 635475:636032 forward MW:21225	21	13	103.785	J	Translation, ribosomal structure and biogenesis	Information storage and processing	CYTOPLASMIC
NCDO2118_RS12485	ribonuclease HIII 2538777:2539655 forward MW:32205	11	6	54.3253	L	Replication, recombination and repair	Information storage and processing	CYTOPLASMIC
NCDO2118_RS01055	epimerase 206588:207529 forward MW:35082	12	8	86.1657	MG	Cell wall/membrane/envelope biogenesis	Cellular processes and sinaling	CYTOPLASMIC
NCDO2118_RS03915	haloacid dehalogenase 782076:782744 forward MW:25312	6	3	32.5553	R	General function prediction only	Poorly characterized	CYTOPLASMIC
NCDO2118_RS09710	F0F1 ATP synthase subunit delta 2012162:2012689 reverse MW:19129	18	13	131.933	C	Energy production and conversion	Metabolism	CYTOPLASMIC
NCDO2118_RS03930	replicative DNA helicase 785257:786624 forward MW:50475	13	6	62.4363	L	Replication, recombination and repair	Information storage and processing	CYTOPLASMIC
NCDO2118_RS07780	6-phospho-beta-glucosidase 1617289:1618716 reverse MW:55521	26	18	160.585	G	Carbohydrate transport and metabolism	Metabolism	CYTOPLASMIC
NCDO2118_RS07100	manganese ABC transporter substrate-binding protein 1478835:1479776 reverse MW:35451	9	5	70.9544	P	Inorganic ion transport and metabolism	Metabolism	PSE
NCDO2118_RS09235	maltose ABC transporter substrate-binding protein 1916069:1917298 forward MW:43464	45	32	342.143	G	Carbohydrate transport and metabolism	Metabolism	PSE
NCDO2118_RS09375	PTS mannose transporter subunit IIC 1942298:1943110 forward MW:27562	9	9	37.3036	G	Carbohydrate transport and metabolism	Metabolism	MEMBRANE
NCDO2118_RS08230	hydroxymethylglutaryl-CoA synthase 1717509:1718663 forward MW:42717	5	5	32.5568	I	Lipid transport and metabolism	Metabolism	CYTOPLASMIC
NCDO2118_RS11960	gluconokinase 2448833:2450344 reverse MW:56163	5	2	29.425	G	Carbohydrate transport and metabolism	Metabolism	CYTOPLASMIC
NCDO2118_RS02080	5-hydroxymethyluracil DNA glycosylase 404773:405591 forward MW:31305	15	7	79.2487	L	Replication, recombination and repair	Information storage and processing	CYTOPLASMIC
NCDO2118_RS01995	2,3-bisphosphoglycerate-dependent phosphoglycerate mutase 381452:382153 forward MW:26329	25	20	174.411	G	Carbohydrate transport and metabolism	Metabolism	CYTOPLASMIC
NCDO2118_RS10400	bifunctional protein GlmU 2147920:2149296 reverse MW:49180	31	18	205.373	M	Cell wall/membrane/envelope biogenesis	Cellular processes and sinaling	CYTOPLASMIC
NCDO2118_RS11890	valyl-tRNA synthetase 2430626:2433268 reverse MW:100529	92	66	622.406	J	Translation, ribosomal structure and biogenesis	Information storage and processing	CYTOPLASMIC
NCDO2118_RS02505	Unknown Function 493729:494271 forward MW:19451	7	3	36.8281	S	Function unknown	Poorly characterized	CYTOPLASMIC
NCDO2118_RS07120	Unknown Function 1482004:1482237 reverse MW:8937	2	2	10.5899	S	Function unknown	Poorly characterized	CYTOPLASMIC
NCDO2118_RS10290	elongation factor Tu 2126194:2127381 reverse MW:43212	81	63	410.866	J	Translation, ribosomal structure and biogenesis	Information storage and processing	CYTOPLASMIC
NCDO2118_RS08165	CCA-adding protein 1706178:1707374 reverse MW:45782	5	3	26.925	J	Translation, ribosomal structure and biogenesis	Information storage and processing	CYTOPLASMIC
NCDO2118_RS01860	seryl-tRNA synthetase 357866:358084 forward MW:8403	11	8	72.8974	S	Function unknown	Poorly characterized	CYTOPLASMIC
NCDO2118_RS11775	elongation factor Ts 2405606:2406634 reverse MW:36669	33	22	237.1	J	Translation, ribosomal structure and biogenesis	Information storage and processing	CYTOPLASMIC
NCDO2118_RS04165	methionyl-tRNA synthetase 830875:832863 forward MW:75833	60	39	493.068	J	Translation, ribosomal structure and biogenesis	Information storage and processing	CYTOPLASMIC
NCDO2118_RS05585	orotate phosphoribosyltransferase 1116339:1116968 forward MW:22603	15	10	110.675	F	Nucleotide transport and metabolism	Metabolism	CYTOPLASMIC
NCDO2118_RS09165	ubiquinone/menaquinone biosynthesis methyltransferase 1894893:1895633 reverse MW:27814	11	5	61.363	H	Coenzyme transport and metabolism	Metabolism	CYTOPLASMIC
NCDO2118_RS04040	translation initiation factor IF-2 807524:810358 forward MW:103737	55	33	396.68	J	Translation, ribosomal structure and biogenesis	Information storage and processing	CYTOPLASMIC
NCDO2118_RS00855	acetyltransferase 167241:168293 forward MW:40658	10	4	56.6474	R	General function prediction only	Poorly characterized	CYTOPLASMIC
NCDO2118_RS08130	oxidoreductase 1698539:1699513 reverse MW:36533	6	4	35.0429	R	General function prediction only	Poorly characterized	CYTOPLASMIC
NCDO2118_RS09625	ABC transporter ATP-binding protein 1993607:1994386 reverse MW:28875	11	6	86.7381	V	Defense mechanisms	Cellular processes and sinaling	CYTOPLASMIC
NCDO2118_RS09115	dehydrogenase 1887387:1888367 forward MW:36229	19	8	118.31	R	General function prediction only	Poorly characterized	CYTOPLASMIC
NCDO2118_RS11170	ornithine carbamoyltransferase 2292866:2293930 reverse MW:39456	53	43	332.256	E	Amino acid transport and metabolism	Metabolism	CYTOPLASMIC
NCDO2118_RS10805	histidine--tRNA ligase 2222563:2223855 reverse MW:49020	39	26	249.849	J	Translation, ribosomal structure and biogenesis	Information storage and processing	CYTOPLASMIC
NCDO2118_RS07190	ATP-dependent 6-phosphofructokinase 1501063:1502085 reverse MW:35806	42	33	217.992	G	Carbohydrate transport and metabolism	Metabolism	CYTOPLASMIC
NCDO2118_RS07025	Unknown Function 1460852:1461049 reverse MW:7537	12	10	82.9395	S	Function unknown	Poorly characterized	CYTOPLASMIC
NCDO2118_RS05720	glycine--tRNA ligase subunit beta 1138777:1140798 forward MW:75718	38	31	266.86	J	Translation, ribosomal structure and biogenesis	Information storage and processing	CYTOPLASMIC
NCDO2118_RS06465	tRNA (uracil-5-)-methyltransferase 1335637:1336980 forward MW:50007	24	15	158.665	J	Translation, ribosomal structure and biogenesis	Information storage and processing	CYTOPLASMIC
NCDO2118_RS01040	Unknown Function 203877:205421 forward MW:58561	5	3	38.7035	S	Function unknown	Poorly characterized	MEMBRANE
NCDO2118_RS07605	tryptophan synthase subunit beta 1582784:1583992 reverse MW:43772	13	7	68.1344	E	Amino acid transport and metabolism	Metabolism	CYTOPLASMIC
NCDO2118_RS11115	glucokinase 2281725:2282696 forward MW:33758	12	6	111.531	KG	Transcription	Information storage and processing	CYTOPLASMIC
NCDO2118_RS00910	23S rRNA (adenine(2503)-C(2))-methyltransferase RlmN 178367:179464 forward MW:41765	10	5	73.8158	R	General function prediction only	Poorly characterized	CYTOPLASMIC
NCDO2118_RS10410	30S ribosomal protein S15 2150391:2150660 reverse MW:10343	13	10	34.83	J	Translation, ribosomal structure and biogenesis	Information storage and processing	CYTOPLASMIC
NCDO2118_RS00450	phospho-2-dehydro-3-deoxyheptonate aldolase 88857:89894 forward MW:39250	13	5	86.0588	E	Amino acid transport and metabolism	Metabolism	CYTOPLASMIC
NCDO2118_RS12045	bacteriocin 2464197:2464361 reverse MW:6013	3	1	20.1773	S	Function unknown	Poorly characterized	CYTOPLASMIC
NCDO2118_RS09655	3-dehydroquinate synthase 1998598:1999668 reverse MW:39351	9	6	52.8104	E	Amino acid transport and metabolism	Metabolism	CYTOPLASMIC
NCDO2118_RS05430	glutaredoxin 1085909:1086127 reverse MW:8302	3	2	24.4457	O	Posttranslational modification, protein turnover, chaperones	Cellular processes and sinaling	CYTOPLASMIC
NCDO2118_RS07520	pantothenate kinase 1563476:1564396 forward MW:36007	7	4	50.8069	H	Coenzyme transport and metabolism	Metabolism	CYTOPLASMIC
NCDO2118_RS07985	chaperone protein ClpB 1671953:1674556 reverse MW:97334	65	43	450.462	O	Posttranslational modification, protein turnover, chaperones	Cellular processes and sinaling	CYTOPLASMIC
NCDO2118_RS07510	pyrimidine-nucleoside phosphorylase 1561366:1562658 reverse MW:46666	18	13	112.084	F	Nucleotide transport and metabolism	Metabolism	CYTOPLASMIC
NCDO2118_RS11200	Unknown Function 2299585:2300178 reverse MW:22110	11	6	91.2126	S	Function unknown	Poorly characterized	CYTOPLASMIC
NCDO2118_RS04620	ABC transporter ATP-binding protein 933426:934205 reverse MW:28913	4	3	26.7946	PH	Inorganic ion transport and metabolism	Metabolism	CYTOPLASMIC
NCDO2118_RS08220	3-hydroxy-3-methylglutaryl-CoA reductase 1714748:1715980 reverse MW:45035	9	7	43.2919	I	Lipid transport and metabolism	Metabolism	CYTOPLASMIC
NCDO2118_RS09055	dipeptidase 1874146:1875234 forward MW:39951	22	11	185.174	E	Amino acid transport and metabolism	Metabolism	CYTOPLASMIC
NCDO2118_RS07210	5-bromo-4-chloroindolyl phosphate hydrolase 1505115:1505723 reverse MW:23720	7	5	54.4991	R	General function prediction only	Poorly characterized	PSE
NCDO2118_RS02650	penicillin-binding protein 1A 521422:523416 reverse MW:71923	23	13	162.567	M	Cell wall/membrane/envelope biogenesis	Cellular processes and sinaling	PSE
NCDO2118_RS08140	antibiotic ABC transporter ATP-binding protein 1699728:1701599 reverse MW:70430	4	3	23.9328	R	General function prediction only	Poorly characterized	CYTOPLASMIC
NCDO2118_RS01440	transcriptional regulator 277665:278216 forward MW:20302	35	23	216.396	S	Function unknown	Poorly characterized	CYTOPLASMIC
NCDO2118_RS11435	50S ribosomal protein L6 2343258:2343794 reverse MW:19257	41	33	229.474	J	Translation, ribosomal structure and biogenesis	Information storage and processing	CYTOPLASMIC
NCDO2118_RS11500	50S ribosomal protein L2 2349365:2350195 reverse MW:29582	41	29	267.323	J	Translation, ribosomal structure and biogenesis	Information storage and processing	CYTOPLASMIC
NCDO2118_RS01005	glycosyl transferase 195615:196823 forward MW:45841	15	10	101.356	M	Cell wall/membrane/envelope biogenesis	Cellular processes and sinaling	CYTOPLASMIC
NCDO2118_RS05620	sugar phosphate phosphatase 1122128:1122943 reverse MW:30064	22	11	164.984	G	Carbohydrate transport and metabolism	Metabolism	CYTOPLASMIC
NCDO2118_RS08315	Unknown Function 1739183:1740412 reverse MW:47554	16	11	118.005	R	General function prediction only	Poorly characterized	CYTOPLASMIC
NCDO2118_RS01680	thiol-disulfide isomerase 321085:321696 forward MW:23316	8	6	47.7918	OC	Posttranslational modification, protein turnover, chaperones	Cellular processes and sinaling	CYTOPLASMIC
NCDO2118_RS05420	ribonucleotide-diphosphate reductase subunit alpha 1083181:1085349 reverse MW:81522	46	26	296.536	F	Nucleotide transport and metabolism	Metabolism	CYTOPLASMIC
NCDO2118_RS10910	sodium:solute symporter 2245465:2246853 reverse MW:50665	10	8	77.004	G	Carbohydrate transport and metabolism	Metabolism	MEMBRANE
NCDO2118_RS07500	deoxyribose-phosphate aldolase 1560501:1561163 reverse MW:23425	25	15	184.323	F	Nucleotide transport and metabolism	Metabolism	CYTOPLASMIC
NCDO2118_RS11405	adenylate kinase 2339078:2339725 reverse MW:23688	34	23	260.007	F	Nucleotide transport and metabolism	Metabolism	CYTOPLASMIC
NCDO2118_RS00835	cold-shock protein 164789:164986 reverse MW:7123	17	13	77.0357	K	Transcription	Information storage and processing	CYTOPLASMIC
NCDO2118_RS04470	exodeoxyribonuclease VII large subunit 903626:904879 forward MW:47108	26	16	146.206	L	Replication, recombination and repair	Information storage and processing	CYTOPLASMIC
NCDO2118_RS05660	phosphate starvation protein PhoH 1129128:1130081 forward MW:35322	6	3	29.3793	T	Signal transduction mechanisms	Cellular processes and sinaling	CYTOPLASMIC
NCDO2118_RS11305	twitching motility protein pilT 2322742:2323827 reverse MW:39647	13	11	78.9324	R	General function prediction only	Poorly characterized	MEMBRANE
NCDO2118_RS06845	branched-chain amino acid aminotransferase 1420519:1421541 reverse MW:36870	13	8	110.603	EH	Amino acid transport and metabolism	Metabolism	CYTOPLASMIC
NCDO2118_RS11725	Unknown Function 2391789:2392541 reverse MW:28327	7	5	37.5782	R	General function prediction only	Poorly characterized	CYTOPLASMIC
NCDO2118_RS10950	peptidase U32 2253787:2254710 reverse MW:34678	24	16	163.855	O	Posttranslational modification, protein turnover, chaperones	Cellular processes and sinaling	CYTOPLASMIC
NCDO2118_RS03395	cation-transporting ATPase 661767:664523 forward MW:100898	30	13	159.732	P	Inorganic ion transport and metabolism	Metabolism	MEMBRANE
NCDO2118_RS04900	Unknown Function 997357:998016 partial 3' reverse MW:23013	11	9	86.134	S	Function unknown	Poorly characterized	PSE
NCDO2118_RS05770	glutamine amidotransferase 1150157:1150942 reverse MW:29340	10	6	82.4291	R	General function prediction only	Poorly characterized	CYTOPLASMIC
NCDO2118_RS00660	1,4-alpha-glucan-branching protein 122287:124233 reverse MW:75418	12	10	72.8839	G	Carbohydrate transport and metabolism	Metabolism	CYTOPLASMIC
NCDO2118_RS12210	Holliday junction DNA helicase RuvA 2485081:2485674 reverse MW:21166	12	9	57.2676	L	Replication, recombination and repair	Information storage and processing	CYTOPLASMIC
NCDO2118_RS08820	transcriptional regulator 1822756:1823055 forward MW:11304	4	4	31.1024	K	Transcription	Information storage and processing	CYTOPLASMIC
NCDO2118_RS07935	TetR family transcriptional regulator 1661224:1661850 forward MW:24120	8	4	50.7082	K	Transcription	Information storage and processing	CYTOPLASMIC
NCDO2118_RS08450	Unknown Function 1769184:1769714 reverse MW:20449	14	8	97.9217	R	General function prediction only	Poorly characterized	CYTOPLASMIC
NCDO2118_RS02375	PTS cellobiose transporter subunit IIC 465057:466394 forward MW:48027	6	3	36.0537	G	Carbohydrate transport and metabolism	Metabolism	MEMBRANE
NCDO2118_RS04325	transcriptional regulator 870899:871354 forward MW:17134	7	5	36.6776	K	Transcription	Information storage and processing	CYTOPLASMIC
NCDO2118_RS00215	dihydrolipoamide dehydrogenase 41393:42811 reverse MW:49867	24	17	173.886	C	Energy production and conversion	Metabolism	CYTOPLASMIC
NCDO2118_RS12510	30S ribosomal protein S12 2544389:2544802 reverse MW:15124	10	6	50.5596	J	Translation, ribosomal structure and biogenesis	Information storage and processing	CYTOPLASMIC
NCDO2118_RS06130	Unknown Function 1225529:1227136 forward MW:58682	10	4	58.174	R	General function prediction only	Poorly characterized	CYTOPLASMIC
NCDO2118_RS05600	endonuclease III 1119491:1120147 forward MW:24601	4	2	22.4588	L	Replication, recombination and repair	Information storage and processing	CYTOPLASMIC
NCDO2118_RS01935	heme ABC transporter ATP-binding protein 370749:372446 forward MW:62857	26	19	140.736	P	Inorganic ion transport and metabolism	Metabolism	CYTOPLASMIC
NCDO2118_RS05225	amino acid ABC transporter substrate-binding protein 1042757:1043602 forward MW:30611	17	11	119.878	ET	Amino acid transport and metabolism	Metabolism	PSE
NCDO2118_RS06680	iron-dependent repressor 1383765:1384418 reverse MW:24964	3	3	15.1084	K	Transcription	Information storage and processing	CYTOPLASMIC
NCDO2118_RS12490	signal peptidase 2539667:2540293 forward MW:23593	16	11	110.937	U	Intracellular trafficking, secretion, and vesicular transport	Cellular processes and sinaling	PSE
NCDO2118_RS11430	50S ribosomal protein L18 2342695:2343042 reverse MW:12358	18	12	102.915	J	Translation, ribosomal structure and biogenesis	Information storage and processing	CYTOPLASMIC
NCDO2118_RS03230	protease 622649:623545 forward MW:33071	42	22	293.702	O	Posttranslational modification, protein turnover, chaperones	Cellular processes and sinaling	MEMBRANE
NCDO2118_RS05415	ribonucleoside-diphosphate reductase 1081796:1082773 reverse MW:37601	17	13	104.09	F	Nucleotide transport and metabolism	Metabolism	CYTOPLASMIC
NCDO2118_RS06340	histidinol dehydrogenase 1310077:1311372 forward MW:47411	11	6	63.662	E	Amino acid transport and metabolism	Metabolism	CYTOPLASMIC
NCDO2118_RS05650	50S ribosomal protein L27 1126919:1127203 forward MW:10033	15	10	99.7436	J	Translation, ribosomal structure and biogenesis	Information storage and processing	CYTOPLASMIC
NCDO2118_RS06050	spermidine/putrescine import ATP-binding protein PotA 1210022:1211308 forward MW:48486	2	2	10.0864	E	Amino acid transport and metabolism	Metabolism	CYTOPLASMIC
NCDO2118_RS10595	threonine--tRNA ligase 2181725:2183665 reverse MW:74196	52	33	326.379	J	Translation, ribosomal structure and biogenesis	Information storage and processing	CYTOPLASMIC
NCDO2118_RS04750	DNA gyrase subunit B 963823:965778 forward MW:72546	66	43	406.386	R	General function prediction only	Poorly characterized	CYTOPLASMIC
NCDO2118_RS03655	ribosomal RNA small subunit methyltransferase A 717893:718777 forward MW:33345	14	8	80.9622	J	Translation, ribosomal structure and biogenesis	Information storage and processing	CYTOPLASMIC
NCDO2118_RS00880	aryl-phospho-beta-D-glucosidase 171956:173392 forward MW:54702	15	6	97.334	G	Carbohydrate transport and metabolism	Metabolism	CYTOPLASMIC
NCDO2118_RS03980	GTPase Der 793145:794455 forward MW:48896	20	12	160.07	R	General function prediction only	Poorly characterized	CYTOPLASMIC
NCDO2118_RS02365	PTS cellobiose transporter subunit IIA 463593:463943 forward MW:12814	12	8	83.9938	G	Carbohydrate transport and metabolism	Metabolism	PSE
NCDO2118_RS09930	amino acid permease 2060254:2061780 reverse MW:55581	2	1	13.939	E	Amino acid transport and metabolism	Metabolism	MEMBRANE
NCDO2118_RS12220	Unknown Function 2487886:2488581 reverse MW:26392	8	6	59.4689	S	Function unknown	Poorly characterized	MEMBRANE
NCDO2118_RS01380	N-acetylmuramidase 267376:268695 reverse MW:46606	16	11	102.216	NU	Cell motility	Cellular processes and sinaling	PSE
NCDO2118_RS08860	diguanylate cyclase 1829275:1829850 forward MW:20294	15	14	92.8495	R	General function prediction only	Poorly characterized	CYTOPLASMIC
NCDO2118_RS07820	alpha-mannosidase 1628358:1631045 reverse MW:102197	44	30	285.227	G	Carbohydrate transport and metabolism	Metabolism	CYTOPLASMIC
NCDO2118_RS07180	lactate dehydrogenase 1498372:1499349 reverse MW:35050	23	12	131.91	C	Energy production and conversion	Metabolism	CYTOPLASMIC
NCDO2118_RS08440	histidine kinase 1766852:1768327 reverse MW:56205	5	4	31.7628	T	Signal transduction mechanisms	Cellular processes and sinaling	PSE
NCDO2118_RS02405	sugar ABC transporter ATP-binding protein 472203:473339 forward MW:42152	34	16	259.751	G	Carbohydrate transport and metabolism	Metabolism	CYTOPLASMIC
NCDO2118_RS09540	Fe-S oxidoreductase 1975823:1976593 forward MW:28336	12	7	73.0392	C	Energy production and conversion	Metabolism	CYTOPLASMIC
NCDO2118_RS04085	acetyl-CoA carboxylase biotin carboxyl carrier protein 817683:818150 forward MW:16386	10	7	79.9823	I	Lipid transport and metabolism	Metabolism	CYTOPLASMIC
NCDO2118_RS04500	DNA repair protein RecN 908638:910332 forward MW:63808	34	21	212.196	L	Replication, recombination and repair	Information storage and processing	CYTOPLASMIC
NCDO2118_RS04125	rhodanese 825219:825521 forward MW:11108	4	3	34.3535	P	Inorganic ion transport and metabolism	Metabolism	CYTOPLASMIC
NCDO2118_RS08795	carbamoyl phosphate synthase small subunit 1817541:1818614 reverse MW:39721	8	4	68.1372	EF	Amino acid transport and metabolism	Metabolism	CYTOPLASMIC
NCDO2118_RS02345	DEAD/DEAH box helicase 460171:461511 forward MW:50489	23	15	158.22	LKJ	Replication, recombination and repair	Information storage and processing	CYTOPLASMIC
NCDO2118_RS11220	pyruvate oxidase 2305465:2307168 reverse MW:62110	40	28	282.954	EH	Amino acid transport and metabolism	Metabolism	CYTOPLASMIC
NCDO2118_RS11465	50S ribosomal protein L14 2346600:2346968 reverse MW:12922	22	17	104.626	J	Translation, ribosomal structure and biogenesis	Information storage and processing	CYTOPLASMIC
NCDO2118_RS08800	Aspartate carbamoyltransferase	17	11	126.312	F	Nucleotide transport and metabolism	Metabolism	CYTOPLASMIC
NCDO2118_RS06290	XRE family transcriptional regulator 1296681:1297391 forward MW:27022	5	1	31.5032	K	Transcription	Information storage and processing	CYTOPLASMIC
NCDO2118_RS12470	50S ribosomal protein L13 2536066:2536512 reverse MW:16195	23	15	114.373	J	Translation, ribosomal structure and biogenesis	Information storage and processing	CYTOPLASMIC
NCDO2118_RS02635	cysteine synthase 518515:519447 reverse MW:32393	19	13	146.641	E	Amino acid transport and metabolism	Metabolism	CYTOPLASMIC
NCDO2118_RS09330	agmatine deiminase 1933065:1934165 reverse MW:41213	3	2	14.0282	E	Amino acid transport and metabolism	Metabolism	CYTOPLASMIC
NCDO2118_RS03030	serine hydroxymethyltransferase 583060:584307 forward MW:44819	29	14	209.218	E	Amino acid transport and metabolism	Metabolism	CYTOPLASMIC
NCDO2118_RS02570	beta-N-acetylhexosaminidase 507759:508970 forward MW:43499	13	6	83.2849	G	Carbohydrate transport and metabolism	Metabolism	SECRETED
NCDO2118_RS08200	lysophospholipase 1711878:1712732 reverse MW:32026	4	4	37.3674	I	Lipid transport and metabolism	Metabolism	CYTOPLASMIC
NCDO2118_RS11985	30S ribosomal protein S18 2453803:2454048 reverse MW:9371	13	10	81.6513	J	Translation, ribosomal structure and biogenesis	Information storage and processing	CYTOPLASMIC
NCDO2118_RS10135	aspartate aminotransferase 2093614:2094795 reverse MW:43228	18	8	105.45	E	Amino acid transport and metabolism	Metabolism	CYTOPLASMIC
NCDO2118_RS03965	primosomal protein DnaI 790819:791700 forward MW:33903	6	3	30.2914	L	Replication, recombination and repair	Information storage and processing	CYTOPLASMIC
NCDO2118_RS12295	asparagine synthase 2501405:2503282 reverse MW:72333	13	8	84.6786	E	Amino acid transport and metabolism	Metabolism	CYTOPLASMIC
NCDO2118_RS02905	ATPase P 561036:563363 forward MW:85598	8	5	45.8584	P	Inorganic ion transport and metabolism	Metabolism	MEMBRANE
NCDO2118_RS07685	oxidoreductase 1595871:1596602 forward MW:26331	5	2	26.7113	R	General function prediction only	Poorly characterized	CYTOPLASMIC
NCDO2118_RS09915	Unknown Function 2056941:2057201 reverse MW:9914	6	6	45.2829	S	Function unknown	Poorly characterized	CYTOPLASMIC
NCDO2118_RS01965	ferrichrome ABC transporter substrate-binding protein 376390:377331 forward MW:34337	6	4	26.159	P	Inorganic ion transport and metabolism	Metabolism	PSE
NCDO2118_RS05775	UDP-N-acetylmuramyl peptide synthase 1150943:1152292 reverse MW:50028	16	10	80.1857	M	Cell wall/membrane/envelope biogenesis	Cellular processes and sinaling	CYTOPLASMIC
NCDO2118_RS04925	Unknown Function 1000526:1000771 forward MW:9244	3	3	17.6644	S	Function unknown	Poorly characterized	CYTOPLASMIC
NCDO2118_RS03935	Unknown Function 786819:787076 forward MW:9834	2	2	27.5697	S	Function unknown	Poorly characterized	CYTOPLASMIC
NCDO2118_RS04055	MarR family transcriptional regulator 812578:813018 forward MW:16808	5	4	33.4507	K	Transcription	Information storage and processing	CYTOPLASMIC
NCDO2118_RS10920	glyceraldehyde 3-phosphate reductase 2247996:2249000 forward MW:37633	9	3	49.6772	C	Energy production and conversion	Metabolism	CYTOPLASMIC
NCDO2118_RS00810	glutamyl-tRNA amidotransferase 157922:159382 forward MW:52133	22	12	147.525	J	Translation, ribosomal structure and biogenesis	Information storage and processing	CYTOPLASMIC
NCDO2118_RS00195	acetyltransferase 38155:38676 forward MW:19369	7	6	56.2935	R	General function prediction only	Poorly characterized	CYTOPLASMIC
NCDO2118_RS03055	acylphosphatase 588280:588573 reverse MW:10935	11	6	82.9252	C	Energy production and conversion	Metabolism	CYTOPLASMIC
NCDO2118_RS10150	universal stress protein UspA 2097974:2098411 forward MW:15700	21	17	170.234	T	Signal transduction mechanisms	Cellular processes and sinaling	CYTOPLASMIC
NCDO2118_RS11780	30S ribosomal protein S2 2406757:2407524 reverse MW:28553	42	25	273.351	J	Translation, ribosomal structure and biogenesis	Information storage and processing	CYTOPLASMIC
NCDO2118_RS08490	Unknown Function 1775121:1775813 reverse MW:26900	2	2	17.7751	S	Function unknown	Poorly characterized	CYTOPLASMIC
NCDO2118_RS03140	DNA methyltransferase 602185:604968 forward MW:106997	7	2	33.0322	V	Defense mechanisms	Cellular processes and sinaling	CYTOPLASMIC
NCDO2118_RS06875	GTPase 1427908:1428762 reverse MW:32316	5	5	29.2212	R	General function prediction only	Poorly characterized	CYTOPLASMIC
NCDO2118_RS03115	HPr kinase/phosphorylase 597349:598278 forward MW:34542	10	5	59.2685	T	Signal transduction mechanisms	Cellular processes and sinaling	CYTOPLASMIC
NCDO2118_RS04080	3-oxoacyl-ACP synthase 816447:817676 forward MW:42488	17	9	141.61	IQ	Lipid transport and metabolism	Metabolism	CYTOPLASMIC
NCDO2118_RS07565	glycine/betaine ABC transporter ATP-binding protein 1571387:1572613 reverse MW:45747	51	24	365.041	E	Amino acid transport and metabolism	Metabolism	CYTOPLASMIC
NCDO2118_RS05960	xanthine phosphoribosyltransferase 1194061:1194654 forward MW:21806	8	6	53.309	F	Nucleotide transport and metabolism	Metabolism	CYTOPLASMIC
NCDO2118_RS11425	30S ribosomal protein S5 2342170:2342676 reverse MW:17595	35	21	176.503	J	Translation, ribosomal structure and biogenesis	Information storage and processing	CYTOPLASMIC
NCDO2118_RS04315	serine dehydratase subunit beta 869223:869894 forward MW:24361	11	8	67.7582	E	Amino acid transport and metabolism	Metabolism	CYTOPLASMIC
NCDO2118_RS01345	oxidoreductase 262289:263308 reverse MW:38056	13	8	86.6593	R	General function prediction only	Poorly characterized	CYTOPLASMIC
NCDO2118_RS11190	arginine repressor 2297410:2297868 forward MW:16893	13	5	92.3117	K	Transcription	Information storage and processing	CYTOPLASMIC
NCDO2118_RS02450	beta-phosphoglucomutase 486368:487033 forward MW:24210	7	3	53.782	R	General function prediction only	Poorly characterized	CYTOPLASMIC
NCDO2118_RS01120	RNA-binding protein 221150:221464 forward MW:11631	4	1	22.0131	J	Translation, ribosomal structure and biogenesis	Information storage and processing	CYTOPLASMIC
NCDO2118_RS02330	isopentenyl pyrophosphate isomerase 455444:456487 forward MW:38790	5	2	33.6004	C	Energy production and conversion	Metabolism	CYTOPLASMIC
NCDO2118_RS03320	long-chain acyl-CoA synthetase 640148:641671 reverse MW:57331	22	15	149.53	I	Lipid transport and metabolism	Metabolism	CYTOPLASMIC
NCDO2118_RS00340	50S ribosomal protein L32 65828:66001 reverse MW:6662	2	2	14.3563	J	Translation, ribosomal structure and biogenesis	Information storage and processing	CYTOPLASMIC
NCDO2118_RS12320	ribose 5-phosphate isomerase 2507100:2507774 reverse MW:24540	13	7	88.4089	G	Carbohydrate transport and metabolism	Metabolism	CYTOPLASMIC
NCDO2118_RS07485	GntR family transcriptional regulator 1557912:1558619 reverse MW:26731	20	8	116.304	K	Transcription	Information storage and processing	CYTOPLASMIC
NCDO2118_RS09715	ATP synthase subunit b 2012691:2013197 reverse MW:17984	18	11	135.744	C	Energy production and conversion	Metabolism	PSE
NCDO2118_RS10600	ribonucleotide reductase 2184227:2184544 reverse MW:12180	10	6	79.9805	R	General function prediction only	Poorly characterized	CYTOPLASMIC
NCDO2118_RS00995	dTDP-glucose 4,6-dehydratase 193444:194496 forward MW:39603	31	22	224.866	M	Cell wall/membrane/envelope biogenesis	Cellular processes and sinaling	CYTOPLASMIC
NCDO2118_RS04260	cell division protein FtsY 853863:855242 forward MW:51048	24	17	128.492	U	Intracellular trafficking, secretion, and vesicular transport	Cellular processes and sinaling	CYTOPLASMIC
NCDO2118_RS10280	cysteine desulfurase 2124605:2125732 forward MW:41097	15	8	97.992	E	Amino acid transport and metabolism	Metabolism	CYTOPLASMIC
NCDO2118_RS05605	SAM-dependent methyltransferase 1120140:1120832 forward MW:25907	12	10	74.0073	R	General function prediction only	Poorly characterized	CYTOPLASMIC
NCDO2118_RS00430	acyl-phosphate glycerol 3-phosphate acyltransferase 84133:84747 forward MW:23367	6	2	43.0246	I	Lipid transport and metabolism	Metabolism	MEMBRANE
NCDO2118_RS11990	Single-stranded DNA-binding protein 2 2454222:2454722 reverse MW:18304	11	7	74.4738	L	Replication, recombination and repair	Information storage and processing	CYTOPLASMIC
NCDO2118_RS11695	ribosomal RNA large subunit methyltransferase H 2385600:2386079 reverse MW:17838	6	2	30.2055	S	Function unknown	Poorly characterized	CYTOPLASMIC
NCDO2118_RS08105	molecular chaperone GroES 1694591:1695637 reverse MW:37422	18	11	104.285	ER	Amino acid transport and metabolism	Metabolism	CYTOPLASMIC
NCDO2118_RS06785	SMC-Scp complex subunit ScpB 1407412:1407978 reverse MW:21060	5	3	38.5656	K	Transcription	Information storage and processing	CYTOPLASMIC
NCDO2118_RS10505	biotin--[acetyl-CoA-carboxylase] synthetase 2168516:2169268 forward MW:28173	3	3	14.4964	H	Coenzyme transport and metabolism	Metabolism	CYTOPLASMIC
NCDO2118_RS04760	Unknown Function 965883:966071 forward MW:7000	21	14	101.805	S	Function unknown	Poorly characterized	CYTOPLASMIC
NCDO2118_RS00110	ATP-dependent zinc metalloprotease FtsH 26105:28192 forward MW:75561	50	27	296.773	O	Posttranslational modification, protein turnover, chaperones	Cellular processes and sinaling	PSE
NCDO2118_RS09355	cytidylate kinase 1939448:1940110 reverse MW:24548	27	16	174.216	F	Nucleotide transport and metabolism	Metabolism	CYTOPLASMIC
NCDO2118_RS09110	uridine kinase 1886469:1887089 reverse MW:23722	7	4	42.4091	F	Nucleotide transport and metabolism	Metabolism	CYTOPLASMIC
NCDO2118_RS05610	Nif3-like dinuclear metal center hexameric protein 1120829:1121602 forward MW:28401	11	8	93.3244	S	Function unknown	Poorly characterized	CYTOPLASMIC
NCDO2118_RS11650	DNA polymerase III PolC 2372345:2377261 reverse MW:185015	35	16	181.496	L	Replication, recombination and repair	Information storage and processing	CYTOPLASMIC
NCDO2118_RS00315	Unknown Function 62901:63098 forward MW:7287	2	2	19.7178	S	Function unknown	Poorly characterized	CYTOPLASMIC
NCDO2118_RS12225	DNA mismatch repair protein MutS 2488696:2491218 reverse MW:94210	23	11	138.9	L	Replication, recombination and repair	Information storage and processing	CYTOPLASMIC
NCDO2118_RS03360	citrate synthase 652804:654129 forward MW:50495	5	2	24.8145	C	Energy production and conversion	Metabolism	CYTOPLASMIC
NCDO2118_RS07260	dihydroorotate dehydrogenase 1513034:1513822 reverse MW:28818	15	8	89.1522	HC	Coenzyme transport and metabolism	Metabolism	CYTOPLASMIC
NCDO2118_RS01385	ribonucleoside triphosphate reductase 269039:271282 forward MW:84104	45	34	300.28	F	Nucleotide transport and metabolism	Metabolism	CYTOPLASMIC
NCDO2118_RS10880	UDP-glucose 4-epimerase 2236737:2237717 reverse MW:36255	43	30	318.928	M	Cell wall/membrane/envelope biogenesis	Cellular processes and sinaling	CYTOPLASMIC
NCDO2118_RS11240	glycerol uptake permease 2310384:2311253 reverse MW:30949	4	4	37.9921	G	Carbohydrate transport and metabolism	Metabolism	MEMBRANE
NCDO2118_RS12175	glutamine synthetase 2478790:2479155 reverse MW:14036	6	3	33.6049	K	Transcription	Information storage and processing	CYTOPLASMIC
NCDO2118_RS02315	mevalonate kinase 452219:453151 reverse MW:34334	22	18	147.37	I	Lipid transport and metabolism	Metabolism	CYTOPLASMIC
NCDO2118_RS06750	50S ribosomal protein L10 1400141:1400656 reverse MW:18086	39	25	255.506	J	Translation, ribosomal structure and biogenesis	Information storage and processing	CYTOPLASMIC
NCDO2118_RS01715	Unknown Function 327129:329267 forward MW:78756	66	45	461.868	K	Transcription	Information storage and processing	CYTOPLASMIC
NCDO2118_RS07835	alpha-1,2-mannosidase 1633648:1635801 forward MW:81890	12	4	73.2125	G	Carbohydrate transport and metabolism	Metabolism	CYTOPLASMIC
NCDO2118_RS06105	cardiolipin synthase 1218196:1219644 forward MW:55624	3	1	15.2602	I	Lipid transport and metabolism	Metabolism	PSE
NCDO2118_RS11455	50S ribosomal protein L5 2345599:2346141 reverse MW:20006	34	27	195.011	J	Translation, ribosomal structure and biogenesis	Information storage and processing	CYTOPLASMIC
NCDO2118_RS09505	Unknown Function 1967170:1967853 reverse MW:25702	7	4	49.3774	R	General function prediction only	Poorly characterized	CYTOPLASMIC
NCDO2118_RS01725	adenosine deaminase 330148:331182 forward MW:39059	11	6	84.5692	F	Nucleotide transport and metabolism	Metabolism	CYTOPLASMIC
NCDO2118_RS07930	phosphoribosylamine--glycine ligase 1659630:1660868 reverse MW:44288	10	3	58.8556	F	Nucleotide transport and metabolism	Metabolism	CYTOPLASMIC
NCDO2118_RS02935	cytochrome C5 566897:568693 forward MW:66482	25	10	136.168	R	General function prediction only	Poorly characterized	CYTOPLASMIC
NCDO2118_RS04160	exodeoxyribonuclease 829836:830693 reverse MW:32322	20	8	119.047	L	Replication, recombination and repair	Information storage and processing	CYTOPLASMIC
NCDO2118_RS01080	sugar transferase 211921:212808 forward MW:34012	18	12	128.168	M	Cell wall/membrane/envelope biogenesis	Cellular processes and sinaling	CYTOPLASMIC
NCDO2118_RS01745	peptidase M22 334482:335207 forward MW:26487	13	7	74.7683	O	Posttranslational modification, protein turnover, chaperones	Cellular processes and sinaling	CYTOPLASMIC
NCDO2118_RS08770	Unknown Function 1813805:1814329 forward MW:19756	7	4	36.1206	S	Function unknown	Poorly characterized	CYTOPLASMIC
NCDO2118_RS09860	glutamate ABC transporter ATP-binding protein 2039402:2040136 reverse MW:27077	14	7	85.9906	E	Amino acid transport and metabolism	Metabolism	CYTOPLASMIC
NCDO2118_RS08810	pyrimidine operon regulatory protein 1821180:1821701 reverse MW:19831	22	17	109.92	F	Nucleotide transport and metabolism	Metabolism	CYTOPLASMIC
NCDO2118_RS10845	zinc protease 2230556:2231839 reverse MW:49308	6	2	34.3924	R	General function prediction only	Poorly characterized	CYTOPLASMIC
NCDO2118_RS07625	anthranilate phosphoribosyltransferase 1586463:1587470 reverse MW:35847	4	2	27.9641	E	Amino acid transport and metabolism	Metabolism	CYTOPLASMIC
NCDO2118_RS10335	cell division protein FtsA 2135792:2137162 reverse MW:49397	53	34	340.964	D	Cell cycle control, cell division, chromosome partitioning	Cellular processes and sinaling	CYTOPLASMIC
NCDO2118_RS07170	branched-chain amino acid ABC transporter permease 1496207:1497301 forward MW:38834	3	1	28.2999	R	General function prediction only	Poorly characterized	MEMBRANE
NCDO2118_RS07765	GMP synthase 1613643:1615184 reverse MW:56866	41	30	331.378	F	Nucleotide transport and metabolism	Metabolism	CYTOPLASMIC
NCDO2118_RS11390	30S ribosomal protein S13 2338010:2338375 reverse MW:13491	26	22	155.238	J	Translation, ribosomal structure and biogenesis	Information storage and processing	CYTOPLASMIC
NCDO2118_RS03290	ATP-dependent Clp protease ATP-binding protein 632890:635340 forward MW:90427	26	14	136.529	O	Posttranslational modification, protein turnover, chaperones	Cellular processes and sinaling	CYTOPLASMIC
NCDO2118_RS12155	phage protein 2475967:2476686 forward MW:28430	5	4	35.7245	S	Function unknown	Poorly characterized	CYTOPLASMIC
NCDO2118_RS05340	PTS fructose IIA component / PTS fructose IIB component / PTS,fructose IIC component 1065780:1067684 forward MW:66139	29	17	174.061	G	Carbohydrate transport and metabolism	Metabolism	PSE
NCDO2118_RS07185	pyruvate kinase 1499467:1500975 reverse MW:54255	69	43	476.243	G	Carbohydrate transport and metabolism	Metabolism	CYTOPLASMIC
NCDO2118_RS00870	Unknown Function 171427:171633 forward MW:7480	4	3	38.7444	S	Function unknown	Poorly characterized	CYTOPLASMIC
NCDO2118_RS04050	mannose-6-phosphate isomerase 811212:812159 forward MW:35555	32	22	176.751	G	Carbohydrate transport and metabolism	Metabolism	CYTOPLASMIC
NCDO2118_RS02955	Unknown Function 570689:570973 forward MW:10835	3	1	16.869	S	Function unknown	Poorly characterized	CYTOPLASMIC
NCDO2118_RS04750	DNA gyrase subunit B 963023:963670 forward MW:23895	3	1	24.3974	R	General function prediction only	Poorly characterized	CYTOPLASMIC
NCDO2118_RS00310	universal stress protein 62306:62773 forward MW:16635	19	15	141.679	T	Signal transduction mechanisms	Cellular processes and sinaling	CYTOPLASMIC
NCDO2118_RS10520	Unknown Function 2170133:2171248 reverse MW:41061	41	26	322.231	S	Function unknown	Poorly characterized	CYTOPLASMIC
NCDO2118_RS01740	Unknown Function 333942:334172 reverse MW:8841	5	5	46.0898	S	Function unknown	Poorly characterized	CYTOPLASMIC
NCDO2118_RS11715	Unknown Function 2390379:2390603 forward MW:8619	13	10	103.153	S	Function unknown	Poorly characterized	CYTOPLASMIC
NCDO2118_RS03690	glucose-1-phosphate adenylyltransferase 725589:726728 forward MW:42663	24	17	155.383	G	Carbohydrate transport and metabolism	Metabolism	CYTOPLASMIC
NCDO2118_RS03855	2-succinyl-5-enolpyruvyl-6-hydroxy-3- cyclohexene-1-carboxylate synthase 768215:769897 reverse MW:62538	9	6	54.6408	H	Coenzyme transport and metabolism	Metabolism	CYTOPLASMIC
NCDO2118_RS12265	glucose-6-phosphate 1-dehydrogenase 2495063:2496574 forward MW:57813	49	35	328.073	G	Carbohydrate transport and metabolism	Metabolism	CYTOPLASMIC
NCDO2118_RS12465	30S ribosomal protein S9 2535654:2536046 reverse MW:14098	13	8	83.3395	J	Translation, ribosomal structure and biogenesis	Information storage and processing	CYTOPLASMIC
NCDO2118_RS06045	UDP-N-acetylenolpyruvoylglucosamine reductase 1208471:1209370 forward MW:32117	7	7	61.1675	M	Cell wall/membrane/envelope biogenesis	Cellular processes and sinaling	CYTOPLASMIC
NCDO2118_RS11315	DNA repair protein RadA 2324788:2326152 reverse MW:49981	6	3	35.0785	O	Posttranslational modification, protein turnover, chaperones	Cellular processes and sinaling	CYTOPLASMIC
NCDO2118_RS02130	ATP-NAD kinase 413822:414646 forward MW:30868	10	5	49.0436	G	Carbohydrate transport and metabolism	Metabolism	CYTOPLASMIC
NCDO2118_RS09530	guanine permease 1973074:1974495 reverse MW:50059	8	6	36.7962	R	General function prediction only	Poorly characterized	MEMBRANE
NCDO2118_RS10890	maltose O-acetyltransferase 2240771:2241394 reverse MW:23448	12	11	78.6378	R	General function prediction only	Poorly characterized	CYTOPLASMIC
NCDO2118_RS04685	LuxR family transcriptional regulator 948393:949022 forward MW:23187	13	10	76.7024	TK	Signal transduction mechanisms	Cellular processes and sinaling	CYTOPLASMIC
NCDO2118_RS11265	glutamate--tRNA ligase 2316938:2318389 reverse MW:55462	43	30	347.308	J	Translation, ribosomal structure and biogenesis	Information storage and processing	CYTOPLASMIC
NCDO2118_RS04070	ACP S-malonyltransferase 814663:815589 forward MW:33571	16	11	148.192	I	Lipid transport and metabolism	Metabolism	CYTOPLASMIC
NCDO2118_RS02220	tyrosyl-tRNA synthetase 434389:435648 reverse MW:47266	19	16	140.941	J	Translation, ribosomal structure and biogenesis	Information storage and processing	CYTOPLASMIC
NCDO2118_RS11515	50S ribosomal protein L3 2351156:2351779 reverse MW:21932	19	17	132.062	J	Translation, ribosomal structure and biogenesis	Information storage and processing	CYTOPLASMIC
NCDO2118_RS10760	heat-shock protein Hsp33 2214478:2215344 forward MW:31720	4	3	22.8908	O	Posttranslational modification, protein turnover, chaperones	Cellular processes and sinaling	CYTOPLASMIC
NCDO2118_RS11880	transcriptional regulator 2429807:2430139 forward MW:12698	6	3	30.6699	K	Transcription	Information storage and processing	CYTOPLASMIC
NCDO2118_RS05320	Unknown Function 1060988:1062751 forward MW:67157	18	11	125.212	S	Function unknown	Poorly characterized	PSE
NCDO2118_RS07415	universal stress protein 1546075:1546500 reverse MW:15683	15	11	112.215	T	Signal transduction mechanisms	Cellular processes and sinaling	CYTOPLASMIC
NCDO2118_RS01160	transcriptional regulator 226395:227111 forward MW:25851	10	5	66.156	S	Function unknown	Poorly characterized	CYTOPLASMIC
NCDO2118_RS09570	30S ribosomal protein S20 1981576:1981809 forward MW:8352	14	10	69.4112	J	Translation, ribosomal structure and biogenesis	Information storage and processing	CYTOPLASMIC
NCDO2118_RS04915	Unknown Function 999690:1000025 reverse MW:12585	8	7	35.6928	K	Transcription	Information storage and processing	CYTOPLASMIC
NCDO2118_RS08420	UDP-N-acetylglucosamine--N-acetylmuramyl- (pentapeptide) pyrophosphoryl-undecaprenol N-acetylglucosamine transferase	14	10	108.736	M	Cell wall/membrane/envelope biogenesis	Cellular processes and sinaling	CYTOPLASMIC
NCDO2118_RS07040	Spx-like protein 1462227:1462598 reverse MW:14537	3	1	20.103	P	Inorganic ion transport and metabolism	Metabolism	CYTOPLASMIC
NCDO2118_RS01845	multidrug ABC transporter ATP-binding protein 352641:354380 forward MW:63908	22	14	144.909	V	Defense mechanisms	Cellular processes and sinaling	PSE
NCDO2118_RS04595	universal stress protein 927907:928332 forward MW:15656	13	8	99.7986	T	Signal transduction mechanisms	Cellular processes and sinaling	CYTOPLASMIC
NCDO2118_RS01075	sugar transferase 210918:211919 forward MW:38422	9	4	45.0164	M	Cell wall/membrane/envelope biogenesis	Cellular processes and sinaling	CYTOPLASMIC
NCDO2118_RS11480	50S ribosomal protein L16 2347481:2347894 reverse MW:15357	7	4	43.9101	J	Translation, ribosomal structure and biogenesis	Information storage and processing	CYTOPLASMIC
NCDO2118_RS08065	thymidylate synthase 1688097:1688936 reverse MW:32499	3	2	16.5882	F	Nucleotide transport and metabolism	Metabolism	CYTOPLASMIC
NCDO2118_RS00690	tyrosine protein kinase 135541:136236 forward MW:25127	4	2	22.7274	D	Cell cycle control, cell division, chromosome partitioning	Cellular processes and sinaling	CYTOPLASMIC
NCDO2118_RS02015	recombination protein RecR 386955:387551 forward MW:21909	4	3	21.6418	L	Replication, recombination and repair	Information storage and processing	CYTOPLASMIC
NCDO2118_RS12325	Crp/Fnr family transcriptional regulator 2507858:2508520 reverse MW:25492	8	5	58.4044	T	Signal transduction mechanisms	Cellular processes and sinaling	CYTOPLASMIC
NCDO2118_RS04275	leucine--tRNA ligase 857208:859697 forward MW:93805	52	34	342.174	J	Translation, ribosomal structure and biogenesis	Information storage and processing	CYTOPLASMIC
NCDO2118_RS11060	acetate kinase 2270951:2272138 reverse MW:43196	33	15	252.157	C	Energy production and conversion	Metabolism	CYTOPLASMIC
NCDO2118_RS00100	tRNA(Ile)-lysidine synthetase 24096:25367 forward MW:49545	6	2	26.2926	D	Cell cycle control, cell division, chromosome partitioning	Cellular processes and sinaling	CYTOPLASMIC
NCDO2118_RS00250	tryptophan--tRNA ligase 49685:50710 reverse MW:38035	22	15	146.208	J	Translation, ribosomal structure and biogenesis	Information storage and processing	CYTOPLASMIC
NCDO2118_RS06320	ribonuclease R 1304982:1306979 forward MW:75182	5	1	32.9794	K	Transcription	Information storage and processing	CYTOPLASMIC
NCDO2118_RS03910	MarR family transcriptional regulator 781472:781948 reverse MW:18811	9	6	53.2059	K	Transcription	Information storage and processing	CYTOPLASMIC
NCDO2118_RS05210	Unknown Function 1039768:1040094 forward MW:11941	4	3	38.9209	S	Function unknown	Poorly characterized	CYTOPLASMIC
NCDO2118_RS05335	phosphofructokinase 1064863:1065780 forward MW:33759	37	26	288.67	G	Carbohydrate transport and metabolism	Metabolism	CYTOPLASMIC
NCDO2118_RS02855	enoyl-ACP reductase 553526:554278 forward MW:26396	24	15	164.036	I	Lipid transport and metabolism	Metabolism	CYTOPLASMIC
NCDO2118_RS09185	1-deoxy-D-xylulose-5-phosphate synthase 1900636:1902378 reverse MW:63879	10	8	69.017	HI	Coenzyme transport and metabolism	Metabolism	CYTOPLASMIC
NCDO2118_RS01030	glycosyl transferase 201121:202095 forward MW:38155	5	3	27.5701	R	General function prediction only	Poorly characterized	CYTOPLASMIC
NCDO2118_RS05670	endoribonuclease YbeY 1130770:1131258 forward MW:18769	8	6	49.3305	R	General function prediction only	Poorly characterized	CYTOPLASMIC
NCDO2118_RS03925	50S ribosomal protein L9 784799:785251 forward MW:16403	10	7	62.3717	J	Translation, ribosomal structure and biogenesis	Information storage and processing	CYTOPLASMIC
NCDO2118_RS12390	Unknown Function 2523905:2524426 reverse MW:19508	10	4	67.1147	S	Function unknown	Poorly characterized	CYTOPLASMIC
NCDO2118_RS00620	Unknown Function 117789:118055 forward MW:10169	21	17	133.514	S	Function unknown	Poorly characterized	CYTOPLASMIC
NCDO2118_RS00445	preprotein translocase subunit SecA 86131:88728 forward MW:98200	63	39	400.901	U	Intracellular trafficking, secretion, and vesicular transport	Cellular processes and sinaling	CYTOPLASMIC
NCDO2118_RS10680	GTPase RsgA 2198979:2199902 reverse MW:34953	4	3	20.8427	R	General function prediction only	Poorly characterized	CYTOPLASMIC
NCDO2118_RS05640	50S ribosomal protein L21 1126265:1126579 forward MW:11423	11	7	73.5224	J	Translation, ribosomal structure and biogenesis	Information storage and processing	CYTOPLASMIC
NCDO2118_RS07720	MarR family transcriptional regulator 1602651:1603070 reverse MW:16187	12	7	67.476	K	Transcription	Information storage and processing	CYTOPLASMIC
NCDO2118_RS07475	histidine kinase 1555811:1557364 forward MW:59143	6	3	36.9863	T	Signal transduction mechanisms	Cellular processes and sinaling	PSE
NCDO2118_RS10405	pyrroline-5-carboxylate reductase 2149524:2150312 forward MW:27942	19	10	120.47	E	Amino acid transport and metabolism	Metabolism	CYTOPLASMIC
NCDO2118_RS08425	UDP-N-acetylmuramoylalanine--D-glutamate ligase 1763272:1764624 reverse MW:49362	24	17	182.862	M	Cell wall/membrane/envelope biogenesis	Cellular processes and sinaling	PSE
NCDO2118_RS02355	transcriptional regulator 462197:462940 forward MW:27943	10	6	55.0307	K	Transcription	Information storage and processing	CYTOPLASMIC
NCDO2118_RS03750	ABC transporter permease 743902:745674 forward MW:64747	13	8	72.1415	V	Defense mechanisms	Cellular processes and sinaling	PSE
NCDO2118_RS08120	dihydroorotate dehydrogenase 1696902:1697837 reverse MW:34247	8	4	53.0779	F	Nucleotide transport and metabolism	Metabolism	CYTOPLASMIC
NCDO2118_RS09580	phosphoglycerate mutase 1984404:1984997 reverse MW:22075	9	7	70.0002	G	Carbohydrate transport and metabolism	Metabolism	CYTOPLASMIC
NCDO2118_RS05215	formate--tetrahydrofolate ligase 1040250:1041917 forward MW:59541	28	17	178.206	F	Nucleotide transport and metabolism	Metabolism	CYTOPLASMIC
NCDO2118_RS03165	Unknown Function 608913:609716 forward MW:31369	3	2	17.0497	S	Function unknown	Poorly characterized	CYTOPLASMIC
NCDO2118_RS09460	phosphate import ATP-binding protein PstB 2 1956895:1957704 reverse MW:30245	15	10	78.4156	P	Inorganic ion transport and metabolism	Metabolism	CYTOPLASMIC
NCDO2118_RS09380	mannose-specific PTS system component IID 1943129:1944052 forward MW:33633	8	5	86.939	G	Carbohydrate transport and metabolism	Metabolism	MEMBRANE
NCDO2118_RS01140	ribosome silencing factor RsfS 223330:223689 forward MW:12834	9	5	69.8671	S	Function unknown	Poorly characterized	CYTOPLASMIC
NCDO2118_RS04490	cell division protein FtsJ 907258:908064 forward MW:29737	5	1	39.4353	J	Translation, ribosomal structure and biogenesis	Information storage and processing	CYTOPLASMIC
NCDO2118_RS00005	chromosomal replication initiator protein DnaA 575:1942 forward MW:51461	28	21	197.447	L	Replication, recombination and repair	Information storage and processing	CYTOPLASMIC
NCDO2118_RS07825	glycosyl hydrolase 1631080:1632375 reverse MW:50216	26	19	196.129	S	Function unknown	Poorly characterized	CYTOPLASMIC
NCDO2118_RS04360	uridine phosphorylase 880607:881323 forward MW:25856	5	3	31.2035	F	Nucleotide transport and metabolism	Metabolism	CYTOPLASMIC
NCDO2118_RS04640	Fe-bacillibactin uptake system FeuA 937001:937954 reverse MW:35324	11	7	62.8934	P	Inorganic ion transport and metabolism	Metabolism	PSE
NCDO2118_RS05235	amino acid ABC transporter ATP-binding protein 1044769:1045521 forward MW:28038	21	10	118.348	E	Amino acid transport and metabolism	Metabolism	CYTOPLASMIC
NCDO2118_RS07515	16S rRNA methyltransferase 1562689:1563288 reverse MW:22147	16	10	116.57	J	Translation, ribosomal structure and biogenesis	Information storage and processing	CYTOPLASMIC
NCDO2118_RS05000	Unknown Function 1007856:1008065 forward MW:7851	3	2	21.1915	S	Function unknown	Poorly characterized	CYTOPLASMIC
NCDO2118_RS07320	Unknown Function 1526400:1527185 forward MW:29266	5	4	28.3503	R	General function prediction only	Poorly characterized	PSE
NCDO2118_RS05355	Unknown Function 1070180:1071163 forward MW:35728	16	8	104.609	S	Function unknown	Poorly characterized	CYTOPLASMIC
NCDO2118_RS09010	adenylosuccinate lyase 1865441:1866706 reverse MW:48449	36	23	211.458	F	Nucleotide transport and metabolism	Metabolism	CYTOPLASMIC
NCDO2118_RS00885	deoxyuridine 5'-triphosphate nucleotidohydrolase 173456:173908 forward MW:16796	6	5	32.8575	F	Nucleotide transport and metabolism	Metabolism	CYTOPLASMIC
NCDO2118_RS12335	universal stress protein UspA 2509910:2510347 reverse MW:15983	13	10	85.6211	T	Signal transduction mechanisms	Cellular processes and sinaling	CYTOPLASMIC
NCDO2118_RS12350	TetR family transcriptional regulator 2515535:2516149 forward MW:23762	6	2	49.6304	K	Transcription	Information storage and processing	CYTOPLASMIC
NCDO2118_RS05900	triosephosphate isomerase 1182860:1183618 forward MW:26905	17	12	150.005	G	Carbohydrate transport and metabolism	Metabolism	CYTOPLASMIC
NCDO2118_RS10375	PepC protein 2144159:2145469 reverse MW:49913	14	10	87.214	E	Amino acid transport and metabolism	Metabolism	CYTOPLASMIC
NCDO2118_RS06705	cytochrome C552 1390505:1392004 reverse MW:56151	27	15	171.944	Q	Secondary metabolites biosynthesis, transport and catabolism	Metabolism	CYTOPLASMIC
NCDO2118_RS00695	tyrosine protein phosphatase 136291:137055 forward MW:28435	2	2	18.7603	GM	Carbohydrate transport and metabolism	Metabolism	CYTOPLASMIC
NCDO2118_RS05800	DNA gyrase subunit A 1157765:1160254 forward MW:92554	70	45	412.545	L	Replication, recombination and repair	Information storage and processing	CYTOPLASMIC
NCDO2118_RS09545	amino acid dehydrogenase 1976603:1978075 forward MW:54218	11	6	86.7798	C	Energy production and conversion	Metabolism	CYTOPLASMIC
NCDO2118_RS12360	Unknown Function 2517053:2517688 reverse MW:24173	17	12	100.061	S	Function unknown	Poorly characterized	CYTOPLASMIC
NCDO2118_RS03675	nitrogen utilization protein B 721166:722137 forward MW:37231	18	13	125.648	K	Transcription	Information storage and processing	CYTOPLASMIC
NCDO2118_RS03005	Unknown Function 579152:579679 forward MW:20528	3	2	16.2004	S	Function unknown	Poorly characterized	CYTOPLASMIC
NCDO2118_RS04390	alanine racemase 887583:888686 forward MW:40689	14	7	72.9178	M	Cell wall/membrane/envelope biogenesis	Cellular processes and sinaling	CYTOPLASMIC
NCDO2118_RS03785	Unknown Function 751603:752712 forward MW:42992	9	3	62.6493	E	Amino acid transport and metabolism	Metabolism	CYTOPLASMIC
NCDO2118_RS05555	multidrug ABC transporter ATP-binding protein 1111263:1113170 forward MW:71655	5	4	25.3741	R	General function prediction only	Poorly characterized	CYTOPLASMIC
NCDO2118_RS00960	Unknown Function 189465:189827 reverse MW:12964	3	2	25.6251	S	Function unknown	Poorly characterized	CYTOPLASMIC
NCDO2118_RS10770	tRNA-dihydrouridine synthase 2216048:2217052 forward MW:36668	5	3	29.2705	J	Translation, ribosomal structure and biogenesis	Information storage and processing	CYTOPLASMIC
NCDO2118_RS00335	50S ribosomal protein L33 65649:65798 reverse MW:5997	5	4	37.341	J	Translation, ribosomal structure and biogenesis	Information storage and processing	CYTOPLASMIC
NCDO2118_RS10195	50S ribosomal protein L20 2107860:2108219 reverse MW:13665	15	10	99.2365	J	Translation, ribosomal structure and biogenesis	Information storage and processing	CYTOPLASMIC
NCDO2118_RS08990	D-ribose transporter ATP-binding protein 1861494:1862972 reverse MW:54190	54	31	332.876	G	Carbohydrate transport and metabolism	Metabolism	CYTOPLASMIC
NCDO2118_RS02575	Unknown Function 508980:509636 forward MW:24616	2	1	15.8985	S	Function unknown	Poorly characterized	PSE
NCDO2118_RS01735	ribonuclease J 332087:333769 reverse MW:61516	34	22	179.08	R	General function prediction only	Poorly characterized	CYTOPLASMIC
NCDO2118_RS05935	dCMP deaminase 1189733:1190173 forward MW:15844	3	3	18.6631	F	Nucleotide transport and metabolism	Metabolism	CYTOPLASMIC
NCDO2118_RS01275	TetR family transcriptional regulator 246572:247219 forward MW:24305	7	4	39.1927	K	Transcription	Information storage and processing	CYTOPLASMIC
NCDO2118_RS11375	50S ribosomal protein L17 2336221:2336601 reverse MW:14255	25	14	109.287	J	Translation, ribosomal structure and biogenesis	Information storage and processing	CYTOPLASMIC
NCDO2118_RS01830	PadR family transcriptional regulator 351138:351488 forward MW:13505	5	2	35.6274	K	Transcription	Information storage and processing	CYTOPLASMIC
NCDO2118_RS05070	Unknown Function 1013841:1014026 forward MW:7252	2	2	12.9406	S	Function unknown	Poorly characterized	CYTOPLASMIC
NCDO2118_RS02010	penicillin-binding protein 2B 384651:386816 forward MW:77843	5	4	27.5743	M	Cell wall/membrane/envelope biogenesis	Cellular processes and sinaling	PSE
NCDO2118_RS08115	Unknown Function 1696078:1696785 reverse MW:27436	2	1	11.1502	S	Function unknown	Poorly characterized	MEMBRANE
NCDO2118_RS09370	PTS mannose transporter subunit IIAB 1941230:1942219 forward MW:35046	58	43	277.268	G	Carbohydrate transport and metabolism	Metabolism	CYTOPLASMIC
NCDO2118_RS05995	GTP-binding protein 1199457:1200044 forward MW:22550	8	6	57.9976	R	General function prediction only	Poorly characterized	CYTOPLASMIC
NCDO2118_RS06815	glutamate racemase 1411072:1411887 reverse MW:30250	18	10	102.753	M	Cell wall/membrane/envelope biogenesis	Cellular processes and sinaling	CYTOPLASMIC
NCDO2118_RS00370	heme ABC transporter ATP-binding protein 71480:73033 forward MW:58347	22	16	126.974	R	General function prediction only	Poorly characterized	CYTOPLASMIC
NCDO2118_RS07470	transcriptional regulator 1555111:1555821 forward MW:27355	13	6	84.9743	TK	Signal transduction mechanisms	Cellular processes and sinaling	CYTOPLASMIC
NCDO2118_RS03660	Xaa-Pro aminopeptidase 718878:719936 forward MW:39454	10	5	55.2285	E	Amino acid transport and metabolism	Metabolism	PSE
NCDO2118_RS05315	molecular chaperone DnaK 1058953:1060776 forward MW:64987	95	65	698.57	O	Posttranslational modification, protein turnover, chaperones	Cellular processes and sinaling	CYTOPLASMIC
NCDO2118_RS02025	UDP-N-acetylmuramoyl-tripeptide--D-alanyl-D- alanine ligase 388792:390114 forward MW:48837	22	14	163.002	M	Cell wall/membrane/envelope biogenesis	Cellular processes and sinaling	CYTOPLASMIC
NCDO2118_RS05745	nicotinate phosphoribosyltransferase 1143723:1145195 forward MW:55870	41	29	265.201	H	Coenzyme transport and metabolism	Metabolism	CYTOPLASMIC
NCDO2118_RS01520	transcriptional regulator 293030:293386 reverse MW:14151	12	6	108.941	R	General function prediction only	Poorly characterized	CYTOPLASMIC
NCDO2118_RS06460	DNA topoisomerase I 1333433:1335565 forward MW:80728	38	20	219.374	L	Replication, recombination and repair	Information storage and processing	CYTOPLASMIC
NCDO2118_RS00955	dihydroxyacetone kinase 187801:189465 reverse MW:59644	33	24	211.117	R	General function prediction only	Poorly characterized	CYTOPLASMIC
NCDO2118_RS03800	deaminase 754531:754998 forward MW:17503	2	2	11.8801	FJ	Nucleotide transport and metabolism	Metabolism	CYTOPLASMIC
NCDO2118_RS03405	acetyltransferase 666241:666513 reverse MW:10181	4	4	24.3537	R	General function prediction only	Poorly characterized	CYTOPLASMIC
NCDO2118_RS10690	phenylalanine--tRNA ligase subunit beta 2201310:2203703 reverse MW:87215	24	14	174.063	J	Translation, ribosomal structure and biogenesis	Information storage and processing	CYTOPLASMIC
NCDO2118_RS09695	ATP synthase subunit beta 2008046:2009455 reverse MW:50893	61	45	436.025	C	Energy production and conversion	Metabolism	CYTOPLASMIC
NCDO2118_RS01000	dTDP-4-dehydrorhamnose reductase 194582:195481 forward MW:33125	24	14	175.733	M	Cell wall/membrane/envelope biogenesis	Cellular processes and sinaling	CYTOPLASMIC
NCDO2118_RS11000	50S ribosomal protein L1 2261794:2262483 reverse MW:24049	35	24	255.622	J	Translation, ribosomal structure and biogenesis	Information storage and processing	CYTOPLASMIC
NCDO2118_RS10500	cyclopropane-fatty-acyl-phospholipid synthase 2167070:2168263 reverse MW:45373	23	15	152.962	M	Cell wall/membrane/envelope biogenesis	Cellular processes and sinaling	CYTOPLASMIC
NCDO2118_RS10300	isoleucyl-tRNA synthetase 2128038:2130836 reverse MW:106831	73	51	487.099	J	Translation, ribosomal structure and biogenesis	Information storage and processing	CYTOPLASMIC
NCDO2118_RS11730	DNA polymerase I 2392902:2395535 reverse MW:98744	54	32	330.038	L	Replication, recombination and repair	Information storage and processing	CYTOPLASMIC
NCDO2118_RS02630	peptide ABC transporter substrate-binding protein 516655:518304 reverse MW:59913	10	6	71.9818	E	Amino acid transport and metabolism	Metabolism	PSE
NCDO2118_RS04355	30S ribosomal protein S1 879230:880456 forward MW:44710	48	37	311.978	J	Translation, ribosomal structure and biogenesis	Information storage and processing	CYTOPLASMIC
NCDO2118_RS05330	lactose transport regulator 1064078:1064779 forward MW:25879	7	5	41.5344	KG	Transcription	Information storage and processing	CYTOPLASMIC
NCDO2118_RS03265	adenine phosphoribosyltransferase 628673:629185 forward MW:18712	2	1	16.5096	F	Nucleotide transport and metabolism	Metabolism	CYTOPLASMIC
NCDO2118_RS12275	molecular chaperone DnaJ 2497427:2498566 reverse MW:40671	21	15	130.883	O	Posttranslational modification, protein turnover, chaperones	Cellular processes and sinaling	CYTOPLASMIC
NCDO2118_RS07155	fibronectin-binding protein 1492038:1493660 forward MW:61273	25	13	159.991	K	Transcription	Information storage and processing	CYTOPLASMIC
NCDO2118_RS09400	serine--tRNA ligase 1946201:1947472 forward MW:47469	29	19	171.823	J	Translation, ribosomal structure and biogenesis	Information storage and processing	CYTOPLASMIC
NCDO2118_RS09030	thioredoxin 1868323:1868637 reverse MW:11672	8	5	61.7393	OC	Posttranslational modification, protein turnover, chaperones	Cellular processes and sinaling	CYTOPLASMIC
NCDO2118_RS12205	Holliday junction DNA helicase RuvB 2483953:2484954 reverse MW:37633	9	6	51.2122	L	Replication, recombination and repair	Information storage and processing	CYTOPLASMIC
NCDO2118_RS11930	recombinase RecX 2441105:2441917 forward MW:31340	7	4	33.8068	R	General function prediction only	Poorly characterized	CYTOPLASMIC
NCDO2118_RS04145	arsenate reductase 827837:828187 forward MW:13571	7	4	39.3943	P	Inorganic ion transport and metabolism	Metabolism	CYTOPLASMIC
NCDO2118_RS05265	endonuclease 1050649:1051707 forward MW:40309	9	3	46.8358	R	General function prediction only	Poorly characterized	PSE
NCDO2118_RS00065	peptidyl-tRNA hydrolase 16817:17383 forward MW:20963	2	2	16.8325	J	Translation, ribosomal structure and biogenesis	Information storage and processing	CYTOPLASMIC
NCDO2118_RS11255	ABC transporter substrate-binding protein 2314578:2315420 forward MW:31023	13	9	95.2153	ET	Amino acid transport and metabolism	Metabolism	PSE
NCDO2118_RS05350	ATPase P 1069296:1070183 forward MW:33561	13	8	95.1931	R	General function prediction only	Poorly characterized	CYTOPLASMIC
NCDO2118_RS03000	peptide chain release factor 1 578079:579152 forward MW:40391	40	25	276.902	J	Translation, ribosomal structure and biogenesis	Information storage and processing	CYTOPLASMIC
NCDO2118_RS01090	glycerol-3-phosphate cytidiltransferase 214042:214479 forward MW:17097	14	11	70.4128	MI	Cell wall/membrane/envelope biogenesis	Cellular processes and sinaling	CYTOPLASMIC
NCDO2118_RS01905	ABC transporter substrate-binding protein 365423:366283 forward MW:31190	16	3	99.8308	P	Inorganic ion transport and metabolism	Metabolism	SECRETED
NCDO2118_RS02480	LytR family transcriptional regulator 489940:491325 forward MW:49464	6	4	40.5243	K	Transcription	Information storage and processing	SECRETED
NCDO2118_RS07205	tellurite resistance protein TelA 1503792:1504970 reverse MW:44310	40	23	274.436	P	Inorganic ion transport and metabolism	Metabolism	CYTOPLASMIC
NCDO2118_RS02265	molecular chaperone GroEL 443261:444889 forward MW:57208	87	69	533.176	O	Posttranslational modification, protein turnover, chaperones	Cellular processes and sinaling	CYTOPLASMIC
NCDO2118_RS06965	Cro/Cl family transcriptional regulator 1449623:1449838 reverse MW:8106	4	2	34.2493	K	Transcription	Information storage and processing	CYTOPLASMIC
NCDO2118_RS05945	haloacid dehalogenase 1191048:1191821 forward MW:28237	14	10	73.7058	G	Carbohydrate transport and metabolism	Metabolism	CYTOPLASMIC
NCDO2118_RS11005	50S ribosomal protein L11 2262780:2263205 reverse MW:14673	21	16	111.847	J	Translation, ribosomal structure and biogenesis	Information storage and processing	CYTOPLASMIC
NCDO2118_RS11770	septation ring formation regulator EzrA 2403671:2405401 reverse MW:66130	61	35	389.53	D	Cell cycle control, cell division, chromosome partitioning	Cellular processes and sinaling	PSE
NCDO2118_RS11175	arginine deiminase 2294114:2295346 reverse MW:46043	44	32	324.146	E	Amino acid transport and metabolism	Metabolism	CYTOPLASMIC
NCDO2118_RS09975	Unknown Function 2070961:2071881 reverse MW:35711	11	6	59.059	S	Function unknown	Poorly characterized	CYTOPLASMIC
NCDO2118_RS09920	alcohol dehydrogenase 2057222:2058244 reverse MW:35776	20	18	129.634	R	General function prediction only	Poorly characterized	CYTOPLASMIC
NCDO2118_RS02190	thiamine biosynthesis protein ThiI 427494:428714 forward MW:45270	29	21	172.143	H	Coenzyme transport and metabolism	Metabolism	CYTOPLASMIC
NCDO2118_RS03210	potassium transporter kup 617593:619608 forward MW:75445	14	10	68.4499	P	Inorganic ion transport and metabolism	Metabolism	MEMBRANE
NCDO2118_RS11785	Unknown Function 2407883:2408908 forward MW:37302	34	23	244.743	G	Carbohydrate transport and metabolism	Metabolism	CYTOPLASMIC
NCDO2118_RS00790	glycosyltransferase 153185:154768 forward MW:58327	7	5	41.5525	R	General function prediction only	Poorly characterized	MEMBRANE
NCDO2118_RS09105	phosphotransacetylase 1885273:1886253 reverse MW:35256	35	19	260.64	C	Energy production and conversion	Metabolism	CYTOPLASMIC
NCDO2118_RS11685	preprotein translocase subunit YajC 2384456:2384788 reverse MW:11914	5	4	40.3672	U	Intracellular trafficking, secretion, and vesicular transport	Cellular processes and sinaling	MEMBRANE
NCDO2118_RS07600	tryptophan synthase subunit alpha 1582026:1582787 reverse MW:27686	8	5	41.936	E	Amino acid transport and metabolism	Metabolism	CYTOPLASMIC
NCDO2118_RS11150	aminotransferase 2287824:2288954 reverse MW:42696	27	18	173.037	E	Amino acid transport and metabolism	Metabolism	CYTOPLASMIC
NCDO2118_RS04340	ABC transporter permease 874106:876757 reverse MW:99503	7	3	42.0267	S	Function unknown	Poorly characterized	PSE
NCDO2118_RS01900	ABC transporter substrate-binding protein 364419:365279 forward MW:31283	25	15	180.299	P	Inorganic ion transport and metabolism	Metabolism	SECRETED
NCDO2118_RS11535	threonine synthase 2354113:2355603 reverse MW:55213	37	22	221.875	E	Amino acid transport and metabolism	Metabolism	CYTOPLASMIC
NCDO2118_RS10480	guanylate kinase 2162136:2162753 reverse MW:23623	3	2	16.7571	F	Nucleotide transport and metabolism	Metabolism	CYTOPLASMIC
NCDO2118_RS00105	hypoxanthine-guanine phosphoribosyltransferase 25348:25899 forward MW:20648	13	9	97.8353	F	Nucleotide transport and metabolism	Metabolism	CYTOPLASMIC
NCDO2118_RS08410	GTPase Obg 1759347:1760660 reverse MW:48234	26	17	160.26	R	General function prediction only	Poorly characterized	CYTOPLASMIC
NCDO2118_RS05510	glycosyltransferase 1102627:1103583 forward MW:35990	22	10	142.719	M	Cell wall/membrane/envelope biogenesis	Cellular processes and sinaling	MEMBRANE
NCDO2118_RS11440	30S ribosomal protein S8 2344011:2344409 reverse MW:14671	32	23	154.222	J	Translation, ribosomal structure and biogenesis	Information storage and processing	CYTOPLASMIC
NCDO2118_RS01785	phosphonates import ATP-binding protein PhnC 340086:340826 forward MW:27414	8	4	41.3172	P	Inorganic ion transport and metabolism	Metabolism	CYTOPLASMIC
NCDO2118_RS02240	thioredoxin 439757:440074 forward MW:12043	8	6	65.4633	OC	Posttranslational modification, protein turnover, chaperones	Cellular processes and sinaling	CYTOPLASMIC
NCDO2118_RS11415	50S ribosomal protein L15 2341262:2341705 reverse MW:15376	38	27	187.845	J	Translation, ribosomal structure and biogenesis	Information storage and processing	CYTOPLASMIC
NCDO2118_RS11230	Unknown Function 2308424:2309203 reverse MW:29430	10	7	90.8637	S	Function unknown	Poorly characterized	CYTOPLASMIC
NCDO2118_RS06855	glutamate decarboxylase 1422562:1423962 reverse MW:53942	30	22	278.819	E	Amino acid transport and metabolism	Metabolism	CYTOPLASMIC
NCDO2118_RS01150	Unknown Function 224575:225744 forward MW:43915	4	2	18.3696	R	General function prediction only	Poorly characterized	CYTOPLASMIC
NCDO2118_RS04690	hydrolase 949093:949899 forward MW:30255	8	5	49.3853	R	General function prediction only	Poorly characterized	CYTOPLASMIC
NCDO2118_RS00420	hydrolase 81784:82407 forward MW:24160	3	1	14.7786	R	General function prediction only	Poorly characterized	CYTOPLASMIC
NCDO2118_RS11030	S1 RNA-binding protein 2265996:2266853 reverse MW:32285	21	10	114.441	S	Function unknown	Poorly characterized	CYTOPLASMIC
NCDO2118_RS06990	acetyltransferase 1454476:1455081 reverse MW:22415	4	2	19.7423	R	General function prediction only	Poorly characterized	CYTOPLASMIC
NCDO2118_RS01165	Unknown Function 227177:227818 forward MW:24767	4	1	20.933	S	Function unknown	Poorly characterized	CYTOPLASMIC
NCDO2118_RS10665	ribulose-phosphate 3-epimerase 2197784:2198434 reverse MW:23514	15	14	87.4045	G	Carbohydrate transport and metabolism	Metabolism	CYTOPLASMIC
NCDO2118_RS12180	phosphatase 2479256:2479693 reverse MW:16492	3	1	20.8505	T	Signal transduction mechanisms	Cellular processes and sinaling	CYTOPLASMIC
NCDO2118_RS01070	oligosaccharide glycerophosphotransferase 210092:210928 forward MW:33321	19	10	115.427	M	Cell wall/membrane/envelope biogenesis	Cellular processes and sinaling	CYTOPLASMIC
NCDO2118_RS01670	cobalt ABC transporter ATP-binding protein 319395:320261 forward MW:31840	18	10	114.825	P	Inorganic ion transport and metabolism	Metabolism	CYTOPLASMIC
NCDO2118_RS09780	bifunctional biotin--[acetyl-CoA-carboxylase] synthetase/biotin operon repressor 2024540:2025511 reverse MW:36404	16	8	89.7394	H	Coenzyme transport and metabolism	Metabolism	CYTOPLASMIC
NCDO2118_RS00035	GTP-binding protein 11336:12451 forward MW:41242	41	29	296.087	J	Translation, ribosomal structure and biogenesis	Information storage and processing	CYTOPLASMIC
NCDO2118_RS01810	aminopeptidase N 345010:347550 forward MW:95305	48	30	290.471	E	Amino acid transport and metabolism	Metabolism	CYTOPLASMIC
NCDO2118_RS10080	excinuclease ABC subunit A 2083075:2085897 reverse MW:104342	29	18	178.062	L	Replication, recombination and repair	Information storage and processing	CYTOPLASMIC
NCDO2118_RS04030	Unknown Function 806869:807195 forward MW:12467	7	2	38.2738	K	Transcription	Information storage and processing	CYTOPLASMIC
NCDO2118_RS05285	phage tail protein 1054645:1055124 forward MW:18657	4	2	20.7243	X	Mobilome: prophages, transposons	Cellular processes and sinaling	CYTOPLASMIC
NCDO2118_RS11245	Xaa-Pro dipeptidyl-peptidase 2311425:2313716 forward MW:87647	42	26	268.147	E	Amino acid transport and metabolism	Metabolism	CYTOPLASMIC
NCDO2118_RS12165	Unknown Function 2477129:2477329 forward MW:7450	3	3	21.3897	S	Function unknown	Poorly characterized	CYTOPLASMIC
NCDO2118_RS01365	Nicotinamidase 265877:266389 forward MW:18895	14	14	90.8487	Q	Secondary metabolites biosynthesis, transport and catabolism	Metabolism	CYTOPLASMIC
NCDO2118_RS04370	excinuclease ABC subunit C 882260:884266 forward MW:76368	15	9	85.7134	L	Replication, recombination and repair	Information storage and processing	CYTOPLASMIC
NCDO2118_RS09970	Unknown Function 2070527:2070898 forward MW:14274	5	1	39.4726	S	Function unknown	Poorly characterized	PSE
NCDO2118_RS02245	tRNA-binding protein 440160:440786 forward MW:22302	14	12	117.951	R	General function prediction only	Poorly characterized	CYTOPLASMIC
NCDO2118_RS06005	GTP cyclohydrolase 1200528:1201577 forward MW:40347	13	7	81.919	H	Coenzyme transport and metabolism	Metabolism	CYTOPLASMIC
NCDO2118_RS10965	copper homeostasis protein CutC 2256175:2256801 forward MW:22463	4	3	27.8299	P	Inorganic ion transport and metabolism	Metabolism	CYTOPLASMIC
NCDO2118_RS01360	oxidoreductase 264866:265711 forward MW:31059	38	30	231.83	R	General function prediction only	Poorly characterized	CYTOPLASMIC
NCDO2118_RS00230	pyruvate dehydrogenase E1 subunit alpha 45579:46703 reverse MW:41325	36	21	280.004	C	Energy production and conversion	Metabolism	CYTOPLASMIC
NCDO2118_RS07255	dihydroorotate dehydrogenase 1512026:1512961 reverse MW:32888	4	3	23.0475	F	Nucleotide transport and metabolism	Metabolism	CYTOPLASMIC
NCDO2118_RS05645	ribosomal protein 1126582:1126917 forward MW:12266	6	2	38.068	J	Translation, ribosomal structure and biogenesis	Information storage and processing	CYTOPLASMIC
NCDO2118_RS04540	phospho-N-acetylmuramoyl-pentapeptide transferase 917240:918229 forward MW:36256	7	4	42.2465	M	Cell wall/membrane/envelope biogenesis	Cellular processes and sinaling	MEMBRANE
NCDO2118_RS02470	hydrolase 488874:489320 forward MW:16934	5	3	29.3145	R	General function prediction only	Poorly characterized	CYTOPLASMIC
NCDO2118_RS11655	Unknown Function 2377432:2377968 reverse MW:20730	9	7	38.2934	S	Function unknown	Poorly characterized	MEMBRANE
NCDO2118_RS01125	nicotinic acid mononucleotide adenylyltransferase 221511:222110 forward MW:22601	5	3	29.6093	H	Coenzyme transport and metabolism	Metabolism	CYTOPLASMIC
NCDO2118_RS05630	Unknown Function 1124526:1124927 forward MW:15589	8	1	42.0067	S	Function unknown	Poorly characterized	CYTOPLASMIC
NCDO2118_RS03780	NADPH:quinone reductase 750449:751435 reverse MW:35912	18	12	127.762	CR	Energy production and conversion	Metabolism	CYTOPLASMIC
NCDO2118_RS01260	dihydroxyacetone kinase subunit DhaM 243881:244252 forward MW:13394	8	5	73.7163	S	Function unknown	Poorly characterized	CYTOPLASMIC
NCDO2118_RS11485	30S ribosomal protein S3 2347898:2348551 reverse MW:23985	25	16	173.388	J	Translation, ribosomal structure and biogenesis	Information storage and processing	CYTOPLASMIC
NCDO2118_RS00355	recombinase RarA 69040:70299 reverse MW:46753	8	4	50.1078	L	Replication, recombination and repair	Information storage and processing	CYTOPLASMIC
NCDO2118_RS02690	trigger factor 528122:529405 forward MW:46930	64	43	438.057	O	Posttranslational modification, protein turnover, chaperones	Cellular processes and sinaling	CYTOPLASMIC
NCDO2118_RS05250	preprotein translocase subunit SecG 1047013:1047261 forward MW:9026	2	1	12.0891	U	Intracellular trafficking, secretion, and vesicular transport	Cellular processes and sinaling	MEMBRANE
NCDO2118_RS12365	tRNA modification GTPase MnmE 2517900:2519267 forward MW:49879	37	17	242.475	R	General function prediction only	Poorly characterized	CYTOPLASMIC
NCDO2118_RS03875	Unknown Function 773390:774313 forward MW:34604	22	15	147.078	R	General function prediction only	Poorly characterized	CYTOPLASMIC
NCDO2118_RS12495	pur operon repressor 2540343:2541158 reverse MW:30361	19	16	142.112	F	Nucleotide transport and metabolism	Metabolism	CYTOPLASMIC
NCDO2118_RS02260	molecular chaperone GroES 442889:443173 forward MW:10220	13	8	88.1498	O	Posttranslational modification, protein turnover, chaperones	Cellular processes and sinaling	CYTOPLASMIC
NCDO2118_RS10395	ADP-ribose pyrophosphatase 2147231:2147815 reverse MW:22246	11	9	56.6853	LR	Replication, recombination and repair	Information storage and processing	CYTOPLASMIC
NCDO2118_RS10130	Unknown Function 2093306:2093617 reverse MW:11845	4	4	26.6021	S	Function unknown	Poorly characterized	CYTOPLASMIC
NCDO2118_RS10475	DNA-directed RNA polymerase subunit omega 2161686:2162039 reverse MW:13434	15	13	72.8219	K	Transcription	Information storage and processing	CYTOPLASMIC
NCDO2118_RS06685	magnesium-transporting ATPase 1384512:1387244 reverse MW:100364	32	13	183.329	P	Inorganic ion transport and metabolism	Metabolism	MEMBRANE
NCDO2118_RS00740	LytR family transcriptional regulator 145677:146600 reverse MW:34520	34	18	205.302	K	Transcription	Information storage and processing	SECRETED
NCDO2118_RS09000	ribokinase 1863411:1864313 reverse MW:32655	11	7	67.3009	G	Carbohydrate transport and metabolism	Metabolism	CYTOPLASMIC
NCDO2118_RS01290	SAM-dependent methyltransferase 249289:250458 forward MW:43532	21	9	133.037	R	General function prediction only	Poorly characterized	CYTOPLASMIC
NCDO2118_RS02960	Unknown Function 571276:571974 reverse MW:24440	8	6	63.734	S	Function unknown	Poorly characterized	CYTOPLASMIC
NCDO2118_RS03080	TetR family transcriptional regulator 592560:593186 forward MW:24337	5	4	26.303	K	Transcription	Information storage and processing	CYTOPLASMIC
NCDO2118_RS02810	ATP-dependent Clp protease ATP-binding subunit ClpE 542663:544909 forward MW:83116	71	46	501.548	O	Posttranslational modification, protein turnover, chaperones	Cellular processes and sinaling	CYTOPLASMIC
NCDO2118_RS09880	DNA-directed RNA polymerase subunit beta 2045731:2049321 reverse MW:133137	76	55	611.733	K	Transcription	Information storage and processing	CYTOPLASMIC
NCDO2118_RS10490	6-phosphogluconolactonase 2164727:2165440 reverse MW:26603	2	2	10.144	G	Carbohydrate transport and metabolism	Metabolism	CYTOPLASMIC
NCDO2118_RS11460	50S ribosomal protein L24 2346161:2346466 reverse MW:10876	9	7	41.4173	J	Translation, ribosomal structure and biogenesis	Information storage and processing	CYTOPLASMIC
NCDO2118_RS08225	3-ketoacyl-CoA thiolase 1716061:1717200 reverse MW:39717	9	7	56.632	I	Lipid transport and metabolism	Metabolism	CYTOPLASMIC
NCDO2118_RS09035	DNA mismatch repair protein MutS 1868734:1871064 reverse MW:87241	34	14	187.433	L	Replication, recombination and repair	Information storage and processing	CYTOPLASMIC
NCDO2118_RS02790	RNA polymerase sigma factor SigA 538439:539599 forward MW:44080	37	25	263.997	K	Transcription	Information storage and processing	CYTOPLASMIC
NCDO2118_RS12235	oxidoreductase 2491975:2492856 reverse MW:31263	29	21	188.54	I	Lipid transport and metabolism	Metabolism	CYTOPLASMIC
NCDO2118_RS07645	NAD(P)H nitroreductase 1590382:1591020 reverse MW:24263	9	7	60.2605	C	Energy production and conversion	Metabolism	CYTOPLASMIC
NCDO2118_RS03010	NADPH-flavin oxidoreductase 579760:580497 forward MW:27422	6	4	35.9491	C	Energy production and conversion	Metabolism	CYTOPLASMIC
NCDO2118_RS00915	nitroreductase 179710:180321 forward MW:23260	9	6	55.6792	C	Energy production and conversion	Metabolism	CYTOPLASMIC
NCDO2118_RS11160	carbamate kinase 2290194:2291138 reverse MW:33795	15	10	111.584	E	Amino acid transport and metabolism	Metabolism	SECRETED
NCDO2118_RS08215	30S ribosomal protein S16 1714387:1714659 reverse MW:10281	19	14	122.534	J	Translation, ribosomal structure and biogenesis	Information storage and processing	CYTOPLASMIC
NCDO2118_RS00625	Holliday junction DNA helicase 118055:118486 forward MW:15607	8	6	40.5548	L	Replication, recombination and repair	Information storage and processing	CYTOPLASMIC
NCDO2118_RS00400	GTP pyrophosphokinase 76974:79196 forward MW:83818	30	16	172.413	TK	Signal transduction mechanisms	Cellular processes and sinaling	CYTOPLASMIC
NCDO2118_RS12285	aspartate racemase 2499413:2500135 reverse MW:27679	18	16	134.05	M	Cell wall/membrane/envelope biogenesis	Cellular processes and sinaling	CYTOPLASMIC
NCDO2118_RS10420	protein phosphatase 2152719:2153495 reverse MW:28306	9	5	65.2052	T	Signal transduction mechanisms	Cellular processes and sinaling	CYTOPLASMIC
NCDO2118_RS00325	glyoxalase 63800:64969 forward MW:43300	10	8	74.8559	E	Amino acid transport and metabolism	Metabolism	CYTOPLASMIC
NCDO2118_RS11285	hypothetical protein 2320921:2321244 reverse MW:12687	1	1	11.6092
NCDO2118_RS11320	metal transporter 2326314:2326541 reverse MW:8097	1	1	8.246
NCDO2118_RS10295	hypothetical protein 2127624:2127806 forward MW:6904	1	1	5.8884
NCDO2118_RS04330	mercuric reductase 871370:871570 forward MW:7123	1	1	7.0138
NCDO2118_RS03255	oxidoreductase 625454:626155 forward MW:25823	1	1	4.7115
NCDO2118_RS05170	hypothetical protein 1034556:1034858 forward MW:11354	1	1	4.4642
NCDO2118_RS08825	cation transporter 1823045:1823959 forward MW:34259	1	1	3.5966
NCDO2118_RS07020	esterase 1459972:1460745 reverse MW:28677	1	1	6.31
NCDO2118_RS02300	initiation-control protein YabA 450687:451013 forward MW:12572	1	1	7.7189
NCDO2118_RS08745	antirepressor 1811270:1812067 reverse MW:30615	1	1	9.6708
NCDO2118_RS08735	hypothetical protein 1810517:1810765 reverse MW:9754	1	1	6.0535
NCDO2118_RS05275	hypothetical protein 1052828:1053091 forward MW:9281	1	1	6.6653
NCDO2118_RS10785	membrane protein 2218452:2219327 reverse MW:32232	1	1	5.5279
NCDO2118_RS02460	ATPase 487971:488666 forward MW:24568	1	1	6.1454
NCDO2118_RS03770	DNA-binding protein 749327:749545 reverse MW:8143	1	1	8.0512
NCDO2118_RS03720	cytochrome C oxidase assembly protein 736548:737543 forward MW:36795	1	1	14.5532
NCDO2118_RS00760	hypothetical protein 148885:149577 forward MW:25505	1	1	8.4398
NCDO2118_RS04515	transporter 911694:912215 forward MW:19634	1	1	7.4064
NCDO2118_RS01910	hypothetical protein 366400:367260 forward MW:31536	1	1	6.7968
NCDO2118_RS04305	NADH dehydrogenase 865703:866947 partial 3' forward MW:45642	1	1	5.1567
NCDO2118_RS10390	hypothetical protein 2146960:2147238 reverse MW:10902	1	1	6.0262
NCDO2118_RS01760	tRNA N6-adenosine threonylcarbamoyltransferase 336200:337240 forward MW:37191	1	1	4.9549
NCDO2118_RS00665	hypothetical protein 124360:124680 reverse MW:12328	1	1	7.5796
NCDO2118_RS07815	sugar ABC transporter permease 1627429:1628361 reverse MW:35224	1	1	6.5599
NCDO2118_RS04765	SAM-dependent methyltransferase 966289:967026 forward MW:28290	1	1	3.9857
NCDO2118_RS04675	hypothetical protein 946741:947370 forward MW:23654	1	1	6.2445
NCDO2118_RS12050	phage protein 2464829:2465059 reverse MW:8820	1	1	5.2666
NCDO2118_RS10255	hypothetical protein 2117754:2118524 reverse MW:29641	1	1	5.3167
NCDO2118_RS10215	hydrolase 2110372:2111076 reverse MW:27947	1	1	6.0579
NCDO2118_RS02885	pantothenic acid transporter pant 558676:559266 reverse MW:20711	1	1	6.6238
NCDO2118_RS03540	hypothetical protein 697697:698158 forward MW:17108	1	1	7.1494
NCDO2118_RS10355	oxidoreductase 2140428:2141273 reverse MW:32801	1	1	4.4749
NCDO2118_RS04530	cell division protein FtsL 914507:914887 forward MW:13996	1	1	5.8549
NCDO2118_RS04910	hypothetical protein 999246:999680 reverse MW:16869	1	1	10.8724
NCDO2118_RS06550	hypothetical protein 1350754:1351383 reverse MW:24959	1	1	4.9752
NCDO2118_RS11835	phosphopantetheine adenylyltransferase 2420866:2421363 reverse MW:19128	1	1	5.6803
NCDO2118_RS02440	PTS beta-glucoside transporter subunit IIABC 482280:483845 forward MW:54558	1	1	16.0312
NCDO2118_RS06980	hydrolase 1452563:1453366 reverse MW:30029	1	1	5.7326
NCDO2118_RS12520	sugar transporter 2546513:2547400 reverse MW:32039	1	1	6.0906
NCDO2118_RS10020	hypothetical protein 2075240:2075413 reverse MW:6763	1	1	5.0072
NCDO2118_RS11330	haloacid dehalogenase 2327664:2328209 reverse MW:20238	1	1	4.5143
NCDO2118_RS01460	XRE family transcriptional regulator 281702:282055 reverse MW:13588	1	1	4.8994
NCDO2118_RS12080	hypothetical protein 2468163:2468351 partial 3' reverse MW:7072	1	1	16.0957
NCDO2118_RS03385	arsenate reductase 659482:659880 forward MW:15030	1	1	5.8433
NCDO2118_RS11895	fibronectin-binding protein 2433524:2434180 reverse MW:24683	1	1	9.6708
NCDO2118_RS02150	FMN reductase 418258:419070 forward MW:30862	1	1	5.4187
NCDO2118_RS00365	hypothetical protein 70983:71450 forward MW:17804	1	1	8.2786
NCDO2118_RS11545	preprotein translocase subunit SecE 2356461:2356655 reverse MW:7706	1	1	7.9939
NCDO2118_RS05205	hypothetical protein 1039238:1039684 forward MW:16916	1	1	14.657

## Sheet: Table S.2
Table S.2 : Total list of proteins identified in NAE condition.
Accession	Description	Peptide count	Unique peptides	Score	COG Symbol	Biological Process	COG Group	SurfG
NCDO2118_RS06330	ATP phosphoribosyltransferase	2	1	10.4113	E	Amino acid transport and metabolism	Metabolism	CYTOPLASMIC
NCDO2118_RS02340	carbon starvation protein CstA 457515:459869 forward MW:85336	4	1	21.1188	T	Signal transduction mechanisms	Cellular processes and sinaling	PSE
NCDO2118_RS00165	PTS mannitol transporter subunit IIA 33127:33558 forward MW:15909	4	1	23.0476	G	Carbohydrate transport and metabolism	Metabolism	CYTOPLASMIC
NCDO2118_RS01420	cold-shock protein 275892:276092 forward MW:7198	4	1	23.5281	K	Transcription	Information storage and processing	CYTOPLASMIC
NCDO2118_RS08175	dihydrodipicolinate reductase 1708179:1708961 reverse MW:28475	3	3	21.0753	E	Amino acid transport and metabolism	Metabolism	CYTOPLASMIC
NCDO2118_RS07240	ribosomal RNA small subunit methyltransferase G	3	1	16.1774	M	Cell wall/membrane/envelope biogenesis	Cellular processes and sinaling	CYTOPLASMIC
NCDO2118_RS10115	Unknown Function	3	1	17.4285	R	General function prediction only	Poorly characterized	CYTOPLASMIC
NCDO2118_RS04605	transcriptional regulator 928848:929381 reverse MW:20721	7	3	47.9119	K	Transcription	Information storage and processing	CYTOPLASMIC
NCDO2118_RS06410	3-isopropylmalate dehydratase small subunit 1323150:1323725 forward MW:21848	5	1	22.5133	E	Amino acid transport and metabolism	Metabolism	CYTOPLASMIC
NCDO2118_RS12100	Unknown Function	2	1	14.819	S	Function unknown	Poorly characterized	CYTOPLASMIC
NCDO2118_RS11025	methionine sulfoxide reductase A	2	1	16.5208	O	Posttranslational modification, protein turnover, chaperones	Cellular processes and sinaling	CYTOPLASMIC
NCDO2118_RS10415	serine/threonine protein kinase	2	1	10.8354	RTKL	General function prediction only	Poorly characterized	PSE
NCDO2118_RS02990	thymidine kinase	2	2	12.6172	F	Nucleotide transport and metabolism	Metabolism	CYTOPLASMIC
NCDO2118_RS02590	6-O-methylguanine-DNA methyltransferase	3	2	17.0475	L	Replication, recombination and repair	Information storage and processing	CYTOPLASMIC
NCDO2118_RS06795	tyrosine recombinase XerD 1408729:1409445 reverse MW:28224	4	2	18.6814	L	Replication, recombination and repair	Information storage and processing	CYTOPLASMIC
NCDO2118_RS06760	XRE family transcriptional regulator 1401082:1401840 reverse MW:28848	4	2	24.8737	K	Transcription	Information storage and processing	CYTOPLASMIC
NCDO2118_RS02495	phosphomethylpyrimidine kinase 492420:493208 forward MW:28800	4	2	22.2748	H	Coenzyme transport and metabolism	Metabolism	CYTOPLASMIC
NCDO2118_RS01970	LysR family transcriptional regulator 377393:378298 forward MW:34698	4	3	23.8883	K	Transcription	Information storage and processing	CYTOPLASMIC
NCDO2118_RS12525	SAM-dependent methyltransferase 2547526:2548116 reverse MW:21877	4	3	22.7235	QR	Secondary metabolites biosynthesis, transport and catabolism	Metabolism	CYTOPLASMIC
NCDO2118_RS04565	GTP diphosphokinase 922399:923073 forward MW:26222	5	2	29.2665	S	Function unknown	Poorly characterized	CYTOPLASMIC
NCDO2118_RS11840	rRNA methyltransferase 2421411:2421959 reverse MW:20419	5	3	28.418	L	Replication, recombination and repair	Information storage and processing	CYTOPLASMIC
NCDO2118_RS06145	Unknown Function 1229024:1230280 forward MW:48013	5	3	43.1122	R	General function prediction only	Poorly characterized	CYTOPLASMIC
NCDO2118_RS10510	Unknown Function 2169375:2169839 reverse MW:18348	5	3	19.8109	KT	Transcription	Information storage and processing	PSE
NCDO2118_RS01690	acetyldiaminopimelate deacetylase 322813:323967 forward MW:43014	5	4	30.7486	R	General function prediction only	Poorly characterized	CYTOPLASMIC
NCDO2118_RS06805	metallophosphoesterase 1409915:1410418 reverse MW:19076	5	5	33.8587	R	General function prediction only	Poorly characterized	CYTOPLASMIC
NCDO2118_RS00395	polysaccharide deacetylase 75817:76773 forward MW:35378	6	1	30.3726	G	Carbohydrate transport and metabolism	Metabolism	PSE
NCDO2118_RS08995	ribose pyranase 1862991:1863389 reverse MW:14461	6	3	32.1853	G	Carbohydrate transport and metabolism	Metabolism	CYTOPLASMIC
NCDO2118_RS10470	primosomal protein DnaI 2159208:2161547 reverse MW:88901	6	3	30.875	L	Replication, recombination and repair	Information storage and processing	CYTOPLASMIC
NCDO2118_RS03015	release factor glutamine methyltransferase 580603:581415 forward MW:30912	7	3	50.3584	J	Translation, ribosomal structure and biogenesis	Information storage and processing	CYTOPLASMIC
NCDO2118_RS11260	dihydrolipoamide dehydrogenase 2315509:2316831 reverse MW:48397	7	4	30.0533	C	Energy production and conversion	Metabolism	CYTOPLASMIC
NCDO2118_RS09200	LacI family transcriptional regulator 1904835:1905809 reverse MW:36375	8	4	41.3876	K	Transcription	Information storage and processing	CYTOPLASMIC
NCDO2118_RS03850	Unknown Function 767410:768225 reverse MW:30161	10	4	68.4601	R	General function prediction only	Poorly characterized	CYTOPLASMIC
NCDO2118_RS00015	ATP-dependent helicase 3347:6646 forward MW:127070	22	12	121.369	L	Replication, recombination and repair	Information storage and processing	CYTOPLASMIC
NCDO2118_RS02040	peptide ABC transporter permease	2	1	11.1944	EP	Amino acid transport and metabolism	Metabolism	MEMBRANE
NCDO2118_RS10255	Unknown Function	2	1	11.1184	S	Function unknown	Poorly characterized	CYTOPLASMIC
NCDO2118_RS0679	segregation and condensation protein A	2	1	10.0323	L	Replication, recombination and repair	Information storage and processing
NCDO2118_RS01460	XRE family transcriptional regulator	2	1	10.2647	K	Transcription	Information storage and processing	CYTOPLASMIC
NCDO2118_RS04150	DeoR family transcriptional regulator	2	1	10.2603	KG	Transcription	Information storage and processing	CYTOPLASMIC
NCDO2118_RS12520	sugar transporter	2	1	10.6189	G	Carbohydrate transport and metabolism	Metabolism	MEMBRANE
NCDO2118_RS12090	Unknown Function	2	1	12.4668	S	Function unknown	Poorly characterized	CYTOPLASMIC
NCDO2118_RS07945	hydrolase	2	1	9.3169	R	General function prediction only	Poorly characterized	CYTOPLASMIC
NCDO2118_RS10640	DNA mismatch repair protein MutT	2	1	10.1526	LR	Replication, recombination and repair	Information storage and processing	CYTOPLASMIC
NCDO2118_RS09725	F0F1 ATP synthase subunit C	2	1	11.166	C	Energy production and conversion	Metabolism	MEMBRANE
NCDO2118_RS08840	histidine kinase	2	1	8.1351	S	Function unknown	Poorly characterized	CYTOPLASMIC
NCDO2118_RS11300	Unknown Function	2	1	10.9019	S	Function unknown	Poorly characterized	MEMBRANE
NCDO2118_RS03715	cytochrome D ubiquinol oxidase subunit I	2	1	17.5752	C	Energy production and conversion	Metabolism	MEMBRANE
NCDO2118_RS01865	transcriptional regulator	2	1	16.0508	K	Transcription	Information storage and processing	CYTOPLASMIC
NCDO2118_RS04850	Unknown Function	2	1	6.7277	S	Function unknown	Poorly characterized	CYTOPLASMIC
NCDO2118_RS04675	Unknown Function	2	1	11.5011	S	Function unknown	Poorly characterized	PSE
NCDO2118_RS03020	GNAT family acetyltransferase	2	1	10.4762	KR	Transcription	Information storage and processing	CYTOPLASMIC
NCDO2118_RS04835	UDP-galactopuranose mutase	2	1	12.9575	M	Cell wall/membrane/envelope biogenesis	Cellular processes and sinaling	CYTOPLASMIC
NCDO2118_RS03500	PTS beta-glucoside transporter subunit IIABC	2	1	10.6572	G	Carbohydrate transport and metabolism	Metabolism	MEMBRANE
NCDO2118_RS00365	Unknown Function	2	1	14.119	S	Function unknown	Poorly characterized	CYTOPLASMIC
NCDO2118_RS08825	cation transporter	2	1	11.9361	P	Inorganic ion transport and metabolism	Metabolism	MEMBRANE
NCDO2118_RS09720	F0F1 ATP synthase subunit A	2	1	9.6694	C	Energy production and conversion	Metabolism	MEMBRANE
NCDO2118_RS09490	Lipase/acylhydrolase	2	1	11.5799	E	Amino acid transport and metabolism	Metabolism	CYTOPLASMIC
NCDO2118_RS02440	PTS beta-glucoside transporter subunit IIABC	2	1	19.5458	G	Carbohydrate transport and metabolism	Metabolism	MEMBRANE
NCDO2118_RS08250	PTS fructose transporter subunit IIA	2	1	11.0918	GT	Carbohydrate transport and metabolism	Metabolism	CYTOPLASMIC
NCDO2118_RS04345	galactose-1-phosphate uridylyltransferase	2	1	15.8387	C	Energy production and conversion	Metabolism	CYTOPLASMIC
NCDO2118_RS10390	Unknown Function	2	1	17.1783	S	Function unknown	Poorly characterized	MEMBRANE
NCDO2118_RS12515	D-alanyl-D-alanine carboxypeptidase	2	1	17.2713	M	Cell wall/membrane/envelope biogenesis	Cellular processes and sinaling	SECRETED
NCDO2118_RS00680	polysaccharide biosynthesis protein	2	1	10.9655	M	Cell wall/membrane/envelope biogenesis	Cellular processes and sinaling	MEMBRANE
NCDO2118_RS08180	fatty acid-binding protein DegV	2	1	12.1415	S	Function unknown	Poorly characterized	CYTOPLASMIC
NCDO2118_RS11870	Fe-S-oxidoreductase	2	1	10.4591	R	General function prediction only	Poorly characterized	CYTOPLASMIC
NCDO2118_RS00715	family 2 glycosyltransferase	2	2	18.613	M	Cell wall/membrane/envelope biogenesis	Cellular processes and sinaling	CYTOPLASMIC
NCDO2118_RS03255	oxidoreductase	2	2	16.3437	R	General function prediction only	Poorly characterized	CYTOPLASMIC
NCDO2118_RS08805	uracil permease	2	2	17.9714	F	Nucleotide transport and metabolism	Metabolism	MEMBRANE
NCDO2118_RS08735	Unknown Function	2	2	22.3764	S	Function unknown	Poorly characterized	CYTOPLASMIC
NCDO2118_RS03835	racemase	2	2	9.891	MR	Cell wall/membrane/envelope biogenesis	Cellular processes and sinaling	CYTOPLASMIC
NCDO2118_RS09005	ribose operon repressor	2	2	16.8382	K	Transcription	Information storage and processing	CYTOPLASMIC
NCDO2118_RS06040	Unknown Function	2	2	15.9658	S	Function unknown	Poorly characterized	MEMBRANE
NCDO2118_RS00760	Unknown Function	2	2	12.9714	S	Function unknown	Poorly characterized	MEMBRANE
NCDO2118_RS12315	NUDIX hydrolase	2	2	10.1876	R	General function prediction only	Poorly characterized	CYTOPLASMIC
NCDO2118_RS05740	Unknown Function	2	2	14.2105	S	Function unknown	Poorly characterized	CYTOPLASMIC
NCDO2118_RS01760	tRNA N6-adenosine threonylcarbamoyltransferase	2	2	10.5583	O	Posttranslational modification, protein turnover, chaperones	Cellular processes and sinaling	CYTOPLASMIC
NCDO2118_RS06025	deoxynucleoside kinase	2	2	11.8208	F	Nucleotide transport and metabolism	Metabolism	CYTOPLASMIC
NCDO2118_RS11205	helicase	2	2	8.0351	KL	Transcription	Information storage and processing	CYTOPLASMIC
NCDO2118_RS04700	general stress protein	2	2	17.2453	J	Translation, ribosomal structure and biogenesis	Information storage and processing	CYTOPLASMIC
NCDO2118_RS04515	transporter	2	2	11.2771	S	Function unknown	Poorly characterized	MEMBRANE
NCDO2118_RS00725	Unknown Function	2	2	12.7894	S	Function unknown	Poorly characterized	CYTOPLASMIC
NCDO2118_RS07135	2-dehydropantoate 2-reductase	2	2	10.6009	H	Coenzyme transport and metabolism	Metabolism	CYTOPLASMIC
NCDO2118_RS08715	Unknown Function	2	2	9.0587	S	Function unknown	Poorly characterized	CYTOPLASMIC
NCDO2118_RS05965	xanthine/uracil permease	2	2	9.385	F	Nucleotide transport and metabolism	Metabolism	MEMBRANE
NCDO2118_RS03640	TatD family hydrolase	2	2	9.2866	L	Replication, recombination and repair	Information storage and processing	CYTOPLASMIC
NCDO2118_RS04680	histidine kinase	2	2	9.5447	T	Signal transduction mechanisms	Cellular processes and sinaling	MEMBRANE
NCDO2118_RS00815	NUDIX hydrolase	3	1	22.1452	F	Nucleotide transport and metabolism	Metabolism	CYTOPLASMIC
NCDO2118_RS09520	Unknown Function	3	1	16.0513	S	Function unknown	Poorly characterized	MEMBRANE
NCDO2118_RS01195	30S ribosomal protein S21	3	1	29.3626	J	Translation, ribosomal structure and biogenesis	Information storage and processing	CYTOPLASMIC
NCDO2118_RS04560	LysR family transcriptional regulator	3	1	17.7056	K	Transcription	Information storage and processing	CYTOPLASMIC
NCDO2118_RS05260	isochorismatase	3	1	20.0499	Q	Secondary metabolites biosynthesis, transport and catabolism	Metabolism	CYTOPLASMIC
NCDO2118_RS10465	Unknown Function	3	1	13.8909	S	Function unknown	Poorly characterized
NCDO2118_RS06740	Unknown Function	3	1	21.8441	S	Function unknown	Poorly characterized	CYTOPLASMIC
NCDO2118_RS05360	sporulation protein	3	1	17.5846	S	Function unknown	Poorly characterized	CYTOPLASMIC
NCDO2118_RS11970	transcriptional regulator	3	1	17.1893	R	General function prediction only	Poorly characterized	PSE
NCDO2118_RS01315	Unknown Function	3	1	15.3907	R	General function prediction only	Poorly characterized	CYTOPLASMIC
NCDO2118_RS06065	spermidine/putrescine ABC transporter substrate-binding protein	3	1	15.6387	E	Amino acid transport and metabolism	Metabolism	SECRETED
NCDO2118_RS02045	peptide ABC transporter permease	3	1	11.8213	EP	Amino acid transport and metabolism	Metabolism	MEMBRANE
NCDO2118_RS08720	Unknown Function	3	2	15.5997	S	Function unknown	Poorly characterized	CYTOPLASMIC
NCDO2118_RS02050	peptide ABC transporter ATP-binding protein	3	2	16.5413	EP	Amino acid transport and metabolism	Metabolism	CYTOPLASMIC
NCDO2118_RS06470	tyrosine recombinase XerS	3	2	27.9782	R	General function prediction only	Poorly characterized	CYTOPLASMIC
NCDO2118_RS05380	Unknown Function	3	2	14.0024	S	Function unknown	Poorly characterized	PSE
NCDO2118_RS11545	preprotein translocase subunit SecE	3	2	14.1913	U	Intracellular trafficking, secretion, and vesicular transport	Cellular processes and sinaling	MEMBRANE
NCDO2118_RS02535	nucleoside deoxyribosyltransferase	3	2	17.5006	F	Nucleotide transport and metabolism	Metabolism	CYTOPLASMIC
NCDO2118_RS11905	Unknown Function 2434723:2435067 reverse MW:13154	3	3	14.2487	S	Function unknown	Poorly characterized	CYTOPLASMIC
NCDO2118_RS08705	prephenate dehydrogenase 1806673:1807419 partial 5' reverse MW:28045	3	3	22.0327	E	Amino acid transport and metabolism	Metabolism	CYTOPLASMIC
NCDO2118_RS01285	ABC transporter permease 248049:249191 forward MW:42246	3	3	15.087	V	Defense mechanisms	Cellular processes and sinaling	PSE
NCDO2118_RS04955	Unknown Function 1003139:1003822 partial 3' forward MW:25603	4	1	34.605	L	Replication, recombination and repair	Information storage and processing	CYTOPLASMIC
NCDO2118_RS05695	Xaa-Pro dipeptidase 1134349:1134978 forward MW:23782	4	1	24.0808	S	Function unknown	Poorly characterized	CYTOPLASMIC
NCDO2118_RS03445	fructokinase 676317:677189 forward MW:31555	4	1	22.9939	KG	Transcription	Information storage and processing	CYTOPLASMIC
NCDO2118_RS00825	amidase 161685:163184 forward MW:54839	4	1	26.2791	J	Translation, ribosomal structure and biogenesis	Information storage and processing	CYTOPLASMIC
NCDO2118_RS00595	ribonuclease P 113928:114275 forward MW:13445	4	1	27.1212	J	Translation, ribosomal structure and biogenesis	Information storage and processing	CYTOPLASMIC
NCDO2118_RS04825	family 2 glycosyltransferase 980313:983000 forward MW:106341	4	1	17.3956	M	Cell wall/membrane/envelope biogenesis	Cellular processes and sinaling	CYTOPLASMIC
NCDO2118_RS08430	nitrogen regulatory protein P-II 1764955:1765296 reverse MW:12583	4	2	21.6268	E	Amino acid transport and metabolism	Metabolism	CYTOPLASMIC
NCDO2118_RS03385	arsenate reductase 659482:659880 forward MW:15030	4	2	25.401	P	Inorganic ion transport and metabolism	Metabolism	CYTOPLASMIC
NCDO2118_RS07010	MarR family transcriptional regulator 1458590:1459060 forward MW:18495	4	2	24.4888	K	Transcription	Information storage and processing	CYTOPLASMIC
NCDO2118_RS11620	competence protein 2368171:2368587 reverse MW:15904	4	2	26.0797	NU	Cell motility	Cellular processes and sinaling	PSE
NCDO2118_RS11340	GHMP kinase 2328845:2329822 reverse MW:36005	4	2	21.5574	R	General function prediction only	Poorly characterized	CYTOPLASMIC
NCDO2118_RS03740	Unknown Function 742628:743116 forward MW:18335	4	2	26.7589	CH	Energy production and conversion	Metabolism	CYTOPLASMIC
NCDO2118_RS00720	polysaccharide biosynthesis protein 140924:142000 forward MW:41055	4	2	21.723	M	Cell wall/membrane/envelope biogenesis	Cellular processes and sinaling	CYTOPLASMIC
NCDO2118_RS09585	prephenate dehydratase 1985000:1985839 reverse MW:31024	4	2	25.6952	E	Amino acid transport and metabolism	Metabolism	CYTOPLASMIC
NCDO2118_RS03350	cell division protein FtsW 647899:649161 forward MW:46079	4	2	25.5542	D	Cell cycle control, cell division, chromosome partitioning	Cellular processes and sinaling	MEMBRANE
NCDO2118_RS04485	farnesyl-diphosphate synthase 906322:907179 forward MW:31426	4	2	29.549	H	Coenzyme transport and metabolism	Metabolism	CYTOPLASMIC
NCDO2118_RS05595	DNA replication protein DnaD 1118801:1119469 forward MW:25578	4	2	22.1684	L	Replication, recombination and repair	Information storage and processing	CYTOPLASMIC
NCDO2118_RS01305	Unknown Function 252800:254077 reverse MW:45782	4	2	19.3634	R	General function prediction only	Poorly characterized	CYTOPLASMIC
NCDO2118_RS00575	argininosuccinate synthase 109185:110378 forward MW:43803	4	2	21.6079	E	Amino acid transport and metabolism	Metabolism	CYTOPLASMIC
NCDO2118_RS05075	Unknown Function 1014107:1014529 forward MW:16704	4	2	21.0234	S	Function unknown	Poorly characterized	CYTOPLASMIC
NCDO2118_RS01675	ABC transporter permease 320261:321061 forward MW:30177	4	3	30.592	P	Inorganic ion transport and metabolism	Metabolism	MEMBRANE
NCDO2118_RS06385	sulfurtransferase 1317193:1318152 reverse MW:36849	4	3	21.3338	R	General function prediction only	Poorly characterized	CYTOPLASMIC
NCDO2118_RS03220	tRNA delta(2)-isopentenylpyrophosphate transferase 620844:621728 forward MW:33562	4	3	26.1751	J	Translation, ribosomal structure and biogenesis	Information storage and processing	CYTOPLASMIC
NCDO2118_RS10215	hydrolase 2110372:2111076 reverse MW:27947	4	4	26.603	R	General function prediction only	Poorly characterized	CYTOPLASMIC
NCDO2118_RS11320	metal transporter 2326314:2326541 reverse MW:8097	4	4	29.5156	P	Inorganic ion transport and metabolism	Metabolism	CYTOPLASMIC
NCDO2118_RS10635	homoserine O-succinyltransferase 2191290:2192249 reverse MW:37272	5	1	17.7852	E	Amino acid transport and metabolism	Metabolism	CYTOPLASMIC
NCDO2118_RS09660	shikimate 5-dehydrogenase 1999665:2000525 reverse MW:31216	5	1	31.4025	E	Amino acid transport and metabolism	Metabolism	PSE
NCDO2118_RS06645	sodium:hydrogen antiporter 1372887:1374836 reverse MW:73236	5	1	22.9451	P	Inorganic ion transport and metabolism	Metabolism	PSE
NCDO2118_RS04305	NADH dehydrogenase 865703:866947 partial 3' forward MW:45642	5	2	29.0871	C	Energy production and conversion	Metabolism	CYTOPLASMIC
NCDO2118_RS06505	MarR family transcriptional regulator 1344059:1344514 reverse MW:17474	5	2	28.8277	K	Transcription	Information storage and processing	CYTOPLASMIC
NCDO2118_RS03475	Unknown Function 682852:683688 forward MW:32438	5	2	28.0514	S	Function unknown	Poorly characterized	PSE
NCDO2118_RS06500	acetyltransferase 1343525:1344058 reverse MW:20727	5	2	23.6541	KR	Transcription	Information storage and processing	CYTOPLASMIC
NCDO2118_RS03335	dephospho-CoA kinase 645536:646195 forward MW:24975	5	2	24.3597	H	Coenzyme transport and metabolism	Metabolism	CYTOPLASMIC
NCDO2118_RS08355	S-adenosylmethionine tRNA ribosyltransferase 1746508:1747545 forward MW:38927	5	3	25.9742	J	Translation, ribosomal structure and biogenesis	Information storage and processing	CYTOPLASMIC
NCDO2118_RS04920	antirepressor 1000318:1000509 forward MW:7010	5	3	33.4644	R	General function prediction only	Poorly characterized	CYTOPLASMIC
NCDO2118_RS00920	geranylgeranyl pyrophosphate synthase 180472:181452 forward MW:36300	5	3	36.812	H	Coenzyme transport and metabolism	Metabolism	CYTOPLASMIC
NCDO2118_RS01720	protein SprT-like 329407:329850 forward MW:17424	5	3	35.9014	S	Function unknown	Poorly characterized	CYTOPLASMIC
NCDO2118_RS08020	phosphoribosylformylglycinamidine synthase 1682578:1682841 reverse MW:9741	5	5	28.4529	F	Nucleotide transport and metabolism	Metabolism	CYTOPLASMIC
NCDO2118_RS12330	transporter 2508627:2509847 reverse MW:43434	5	5	24.3637	GEPR	Carbohydrate transport and metabolism	Metabolism	MEMBRANE
NCDO2118_RS02255	single-stranded DNA-binding protein 442380:442769 forward MW:14658	6	1	30.2792	L	Replication, recombination and repair	Information storage and processing	CYTOPLASMIC
NCDO2118_RS10740	Unknown Function 2212219:2212896 reverse MW:25987	6	2	38.6864	S	Function unknown	Poorly characterized	PSE
NCDO2118_RS06830	glutamate synthase 1413808:1415247 reverse MW:52265	6	2	29.8584	ER	Amino acid transport and metabolism	Metabolism	CYTOPLASMIC
NCDO2118_RS06190	PKS biosynthesis protein 1259328:1264043 forward MW:176397	6	2	22.5727	R	General function prediction only	Poorly characterized	CYTOPLASMIC
NCDO2118_RS05920	chromosome partitioning protein ParB 1186922:1187449 forward MW:20291	6	3	38.2015	K	Transcription	Information storage and processing	CYTOPLASMIC
NCDO2118_RS11895	fibronectin-binding protein 2433524:2434180 reverse MW:24683	6	4	31.1852	M	Cell wall/membrane/envelope biogenesis	Cellular processes and sinaling	CYTOPLASMIC
NCDO2118_RS08025	phosphoribosylaminoimidazole-succinocarboxamide synthase 1682897:1683607 reverse MW:27104	6	4	44.4766	F	Nucleotide transport and metabolism	Metabolism	CYTOPLASMIC
NCDO2118_RS04960	Unknown Function 1004034:1005074 forward MW:40383	6	4	46.0823	X	Mobilome: prophages, transposons	Cellular processes and sinaling	CYTOPLASMIC
NCDO2118_RS09160	XRE family transcriptional regulator 1894024:1894857 reverse MW:32962	6	4	24.6757	K	Transcription	Information storage and processing	CYTOPLASMIC
NCDO2118_RS05455	GNAT family acetyltransferase 1090715:1091164 forward MW:17201	6	4	31.214	R	General function prediction only	Poorly characterized	CYTOPLASMIC
NCDO2118_RS03955	Unknown Function 789372:789662 partial 3' reverse MW:11690	6	5	26.4277	S	Function unknown	Poorly characterized	CYTOPLASMIC
NCDO2118_RS06635	trans-acting positive regulator 1370091:1371557 reverse MW:58754	7	1	42.6372	R	General function prediction only	Poorly characterized	CYTOPLASMIC
NCDO2118_RS02115	adenylate cyclase 411384:411977 reverse MW:23048	7	3	39.4366	S	Function unknown	Poorly characterized	CYTOPLASMIC
NCDO2118_RS01295	fructose 1,6-bisphosphatase 250649:252571 forward MW:73852	7	3	41.7948	G	Carbohydrate transport and metabolism	Metabolism	CYTOPLASMIC
NCDO2118_RS01545	Unknown Function 296079:296555 forward MW:18144	7	3	44.1281	S	Function unknown	Poorly characterized	CYTOPLASMIC
NCDO2118_RS04935	antirepressor 1001192:1001905 forward MW:27441	7	3	30.5924	X	Mobilome: prophages, transposons	Cellular processes and sinaling	CYTOPLASMIC
NCDO2118_RS03540	Unknown Function 697697:698158 forward MW:17108	8	2	65.1892	S	Function unknown	Poorly characterized	SECRETED
NCDO2118_RS01910	Unknown Function 366400:367260 forward MW:31536	8	3	59.3352	P	Inorganic ion transport and metabolism	Metabolism	SECRETED
NCDO2118_RS00550	orotidine 5'-phosphate decarboxylase 104350:105291 forward MW:35067	8	4	35.6486	F	Nucleotide transport and metabolism	Metabolism	CYTOPLASMIC
NCDO2118_RS07980	phosphoribosylaminoimidazole synthetase 1670748:1671764 reverse MW:36180	8	4	41.525	F	Nucleotide transport and metabolism	Metabolism	CYTOPLASMIC
NCDO2118_RS04795	sugar ABC transporter ATP-binding protein 971978:973417 forward MW:52997	8	5	64.0375	GM	Carbohydrate transport and metabolism	Metabolism	PSE
NCDO2118_RS05885	N-acetylmuramic acid 6-phosphate etherase 1178936:1179829 forward MW:31966	9	5	55.931	R	General function prediction only	Poorly characterized	CYTOPLASMIC
NCDO2118_RS03600	Unknown Function 709987:710475 partial 3' reverse MW:18820	11	3	61.6909	S	Function unknown	Poorly characterized
NCDO2118_RS07920	phosphoribosylaminoimidazole carboxylase 1657956:1659062 reverse MW:41013	11	4	61.4964	F	Nucleotide transport and metabolism	Metabolism	CYTOPLASMIC
NCDO2118_RS10220	tRNA uridine 5-carboxymethylaminomethyl modification protein 2111246:2113123 reverse MW:69480	11	5	59.9929	D	Cell cycle control, cell division, chromosome partitioning	Cellular processes and sinaling	CYTOPLASMIC
NCDO2118_RS08745	antirepressor 1811270:1812067 reverse MW:30615	12	11	71.2049	K	Transcription	Information storage and processing	CYTOPLASMIC
NCDO2118_RS07095	Unknown Function 1477701:1478561 reverse MW:33345	13	5	62.1612	S	Function unknown	Poorly characterized	CYTOPLASMIC
NCDO2118_RS07060	cell surface protein 1467131:1468285 reverse MW:42969	13	5	63.011	M	Cell wall/membrane/envelope biogenesis	Cellular processes and sinaling	PSE
NCDO2118_RS10695	phenylalanine--tRNA ligase subunit alpha 2203741:2204781 reverse MW:39301	14	9	82.9999	J	Translation, ribosomal structure and biogenesis	Information storage and processing	CYTOPLASMIC
NCDO2118_RS02075	asparagine synthase 402987:404579 forward MW:60384	16	9	90.9327	E	Amino acid transport and metabolism	Metabolism	CYTOPLASMIC
NCDO2118_RS10625	cysteine desulfhydrase 2188775:2189938 reverse MW:44352	18	7	117.775	E	Amino acid transport and metabolism	Metabolism	CYTOPLASMIC
NCDO2118_RS01850	multidrug ABC transporter permease 354411:356378 forward MW:72950	19	6	105.626	V	Defense mechanisms	Cellular processes and sinaling	PSE
NCDO2118_RS07950	purine biosynthesis protein purH 1664256:1665812 reverse MW:57077	24	21	140.862	F	Nucleotide transport and metabolism	Metabolism	CYTOPLASMIC
NCDO2118_RS04570	50S ribosomal protein L19 923214:923558 forward MW:13119	35	25	155.272	J	Translation, ribosomal structure and biogenesis	Information storage and processing
NCDO2118_RS03325	dihydroorotate dehydrogenase	2	1	10.0673	P	Inorganic ion transport and metabolism	Metabolism	PSE
NCDO2118_RS02350	membrane protein	3	1	11.4909	S	Function unknown	Poorly characterized	MEMBRANE
NCDO2118_RS10875	alpha/beta hydrolase 2235671:2236618 reverse MW:35111	4	1	20.514	R	General function prediction only	Poorly characterized	SECRETED
NCDO2118_RS05205	Unknown Function 1039238:1039684 forward MW:16916	6	1	28.4852	S	Function unknown	Poorly characterized	CYTOPLASMIC
NCDO2118_RS10155	hemolysin	2	1	10.6267	R	General function prediction only	Poorly characterized	PSE
NCDO2118_RS06015	DHNTP pyrophosphohydrolase	2	1	10.0674	LR	Replication, recombination and repair	Information storage and processing	CYTOPLASMIC
NCDO2118_RS12165	Unknown Function	2	1	21.5842	S	Function unknown	Poorly characterized	CYTOPLASMIC
NCDO2118_RS01165	Unknown Function	2	1	10.5044	S	Function unknown	Poorly characterized	CYTOPLASMIC
NCDO2118_RS01135	GNAT family acetyltransferase	2	1	12.8469	R	General function prediction only	Poorly characterized	CYTOPLASMIC
NCDO2118_RS10800	diadenosine polyphosphate hydrolase	2	1	12.3346	FGR	Nucleotide transport and metabolism	Metabolism	CYTOPLASMIC
NCDO2118_RS02505	Unknown Function	2	1	12.7161	S	Function unknown	Poorly characterized	CYTOPLASMIC
NCDO2118_RS05600	endonuclease III	2	1	16.3149	L	Replication, recombination and repair	Information storage and processing	CYTOPLASMIC
NCDO2118_RS10455	3-demethylubiquinone-9 3-methyltransferase	2	1	9.7361	S	Function unknown	Poorly characterized	CYTOPLASMIC
NCDO2118_RS00360	acetyl transferase 70343:70831 reverse MW:18368	2	1	14.265	KR	Transcription	Information storage and processing	CYTOPLASMIC
NCDO2118_RS00865	PTS cellobiose transporter subunit IIC	2	1	9.3749	G	Carbohydrate transport and metabolism	Metabolism	MEMBRANE
NCDO2118_RS00900	5'-nucleotidase	2	1	18.8248	F	Nucleotide transport and metabolism	Metabolism	CYTOPLASMIC
NCDO2118_RS00885	deoxyuridine 5'-triphosphate nucleotidohydrolase	2	1	10.4837	F	Nucleotide transport and metabolism	Metabolism	CYTOPLASMIC
NCDO2118_RS05750	GCN5 family acetyltransferase	2	1	10.7223	KR	Transcription	Information storage and processing	CYTOPLASMIC
NCDO2118_RS09890	transcriptional regulator	2	1	10.0788	S	Function unknown	Poorly characterized	CYTOPLASMIC
NCDO2118_RS07620	indole-3-glycerol-phosphate synthase	2	1	16.4084	E	Amino acid transport and metabolism	Metabolism	CYTOPLASMIC
NCDO2118_RS12045	bacteriocin	2	1	13.1686	S	Function unknown	Poorly characterized	CYTOPLASMIC
NCDO2118_RS02575	Unknown Function	2	2	15.6936	S	Function unknown	Poorly characterized	PSE
NCDO2118_RS05250	preprotein translocase subunit SecG	2	2	13.1291	U	Intracellular trafficking, secretion, and vesicular transport	Cellular processes and sinaling	MEMBRANE
NCDO2118_RS05935	dCMP deaminase	2	2	6.9055	F	Nucleotide transport and metabolism	Metabolism	CYTOPLASMIC
NCDO2118_RS05070	Unknown Function	2	2	13.7791	S	Function unknown	Poorly characterized	CYTOPLASMIC
NCDO2118_RS12380	alkylphosphonate transporter	2	2	7.127	P	Inorganic ion transport and metabolism	Metabolism	CYTOPLASMIC
NCDO2118_RS04925	Unknown Function	2	2	20.1993	S	Function unknown	Poorly characterized	CYTOPLASMIC
NCDO2118_RS08905	transporter	2	2	21.6729	G	Carbohydrate transport and metabolism	Metabolism	MEMBRANE
NCDO2118_RS07495	cytidine deaminase	2	2	13.0397	F	Nucleotide transport and metabolism	Metabolism	CYTOPLASMIC
NCDO2118_RS08135	Unknown Function	2	2	23.5135	S	Function unknown	Poorly characterized	CYTOPLASMIC
NCDO2118_RS07120	Unknown Function	2	2	13.5558	S	Function unknown	Poorly characterized	CYTOPLASMIC
NCDO2118_RS12260	Unknown Function	2	2	25.0887	S	Function unknown	Poorly characterized	CYTOPLASMIC
NCDO2118_RS03405	acetyltransferase	2	2	10.7625	R	General function prediction only	Poorly characterized	CYTOPLASMIC
NCDO2118_RS05295	D-alanyl-D-alanine carboxypeptidase	2	2	10.6451	M	Cell wall/membrane/envelope biogenesis	Cellular processes and sinaling	PSE
NCDO2118_RS03265	adenine phosphoribosyltransferase	2	2	9.9983	F	Nucleotide transport and metabolism	Metabolism	CYTOPLASMIC
NCDO2118_RS12055	Unknown Function	2	2	31.2471	S	Function unknown	Poorly characterized	CYTOPLASMIC
NCDO2118_RS10205	translation initiation factor IF-3	2	2	24.1397	J	Translation, ribosomal structure and biogenesis	Information storage and processing	CYTOPLASMIC
NCDO2118_RS04055	MarR family transcriptional regulator	2	2	14.2134	K	Transcription	Information storage and processing	CYTOPLASMIC
NCDO2118_RS00960	Unknown Function	2	2	17.7994	S	Function unknown	Poorly characterized	CYTOPLASMIC
NCDO2118_RS07040	Spx-like protein	3	1	19.281	P	Inorganic ion transport and metabolism	Metabolism	CYTOPLASMIC
NCDO2118_RS00315	Unknown Function	3	1	17.7639	S	Function unknown	Poorly characterized	CYTOPLASMIC
NCDO2118_RS06725	hydroxyethylthiazole kinase	3	1	22.0031	H	Coenzyme transport and metabolism	Metabolism	CYTOPLASMIC
NCDO2118_RS04640	Fe-bacillibactin uptake system FeuA	3	1	20.3884	P	Inorganic ion transport and metabolism	Metabolism	PSE
NCDO2118_RS05185	arsenate reductase	3	1	27.2572	T	Signal transduction mechanisms	Cellular processes and sinaling	CYTOPLASMIC
NCDO2118_RS10965	copper homeostasis protein CutC	3	1	18.9185	P	Inorganic ion transport and metabolism	Metabolism	CYTOPLASMIC
NCDO2118_RS01150	Unknown Function	3	1	16.0873	R	General function prediction only	Poorly characterized	CYTOPLASMIC
NCDO2118_RS00695	tyrosine protein phosphatase	3	1	17.9933	GM	Carbohydrate transport and metabolism	Metabolism	CYTOPLASMIC
NCDO2118_RS07835	alpha-1,2-mannosidase	3	1	16.778	G	Carbohydrate transport and metabolism	Metabolism	CYTOPLASMIC
NCDO2118_RS03125	general stress protein	3	1	28.6038	R	General function prediction only	Poorly characterized	MEMBRANE
NCDO2118_RS01470	Unknown Function	3	1	15.9047	S	Function unknown	Poorly characterized	MEMBRANE
NCDO2118_RS07295	sugar ABC transporter substrate-binding protein	3	1	21.4419	G	Carbohydrate transport and metabolism	Metabolism	PSE
NCDO2118_RS10855	Unknown Function	3	2	17.4547	S	Function unknown	Poorly characterized	CYTOPLASMIC
NCDO2118_RS04175	3-ketoacyl-ACP reductase	3	2	17.3785	IQR	Lipid transport and metabolism	Metabolism	PSE
NCDO2118_RS09805	Unknown Function	3	2	24.6229	S	Function unknown	Poorly characterized	CYTOPLASMIC
NCDO2118_RS04125	rhodanese	3	2	28.9009	P	Inorganic ion transport and metabolism	Metabolism	CYTOPLASMIC
NCDO2118_RS00455	phosphocarrier protein HPr	3	2	27.2274	G	Carbohydrate transport and metabolism	Metabolism	CYTOPLASMIC
NCDO2118_RS08820	transcriptional regulator	3	2	18.4968	K	Transcription	Information storage and processing	CYTOPLASMIC
NCDO2118_RS09930	amino acid permease	3	2	17.8285	E	Amino acid transport and metabolism	Metabolism	MEMBRANE
NCDO2118_RS04750	DNA gyrase subunit B	3	2	15.3852	R	General function prediction only	Poorly characterized	CYTOPLASMIC
NCDO2118_RS10760	heat-shock protein Hsp33	3	2	24.5037	O	Posttranslational modification, protein turnover, chaperones	Cellular processes and sinaling	CYTOPLASMIC
NCDO2118_RS08115	Unknown Function	3	2	10.2918	S	Function unknown	Poorly characterized	MEMBRANE
NCDO2118_RS08200	lysophospholipase	3	2	19.6862	I	Lipid transport and metabolism	Metabolism	CYTOPLASMIC
NCDO2118_RS03800	deaminase	3	2	15.4543	FJ	Nucleotide transport and metabolism	Metabolism	CYTOPLASMIC
NCDO2118_RS01140	ribosome silencing factor RsfS	3	2	29.5492	S	Function unknown	Poorly characterized	CYTOPLASMIC
NCDO2118_RS12240	Unknown Function	3	2	12.4472	S	Function unknown	Poorly characterized	CYTOPLASMIC
NCDO2118_RS02105	Unknown Function 410244:410570 forward MW:12706	3	2	17.4064	S	Function unknown	Poorly characterized	CYTOPLASMIC
NCDO2118_RS06965	Cro/Cl family transcriptional regulator 1449623:1449838 reverse MW:8106	3	2	12.1252	K	Transcription	Information storage and processing	CYTOPLASMIC
NCDO2118_RS08835	gamma-glutamyl kinase 1825301:1826107 reverse MW:29381	3	2	16.2186	E	Amino acid transport and metabolism	Metabolism	CYTOPLASMIC
NCDO2118_RS08130	oxidoreductase 1698539:1699513 reverse MW:36533	3	2	16.3505	R	General function prediction only	Poorly characterized	CYTOPLASMIC
NCDO2118_RS11165	amino acid APC transporter 2291155:2292735 reverse MW:56458	3	3	24.6954	E	Amino acid transport and metabolism	Metabolism	MEMBRANE
NCDO2118_RS10985	histidine triad protein 2260726:2261127 forward MW:14986	3	3	25.9132	FGR	Nucleotide transport and metabolism	Metabolism	CYTOPLASMIC
NCDO2118_RS06820	Unknown Function 1412042:1412281 reverse MW:8932	3	3	29.6357	S	Function unknown	Poorly characterized	MEMBRANE
NCDO2118_RS02415	ABC transporter permease 477524:478402 forward MW:32249	3	3	19.3851	S	Function unknown	Poorly characterized	MEMBRANE
NCDO2118_RS10490	6-phosphogluconolactonase 2164727:2165440 reverse MW:26603	3	3	18.5536	G	Carbohydrate transport and metabolism	Metabolism	CYTOPLASMIC
NCDO2118_RS09385	regulator 1944193:1944576 forward MW:14277	3	3	28.0277	S	Function unknown	Poorly characterized	MEMBRANE
NCDO2118_RS04710	rod shape-determining protein RodA 951849:953093 forward MW:46514	3	3	16.6625	D	Cell cycle control, cell division, chromosome partitioning	Cellular processes and sinaling	MEMBRANE
NCDO2118_RS04185	NADH-flavin reductase 835385:836017 forward MW:23161	3	3	32.3153	R	General function prediction only	Poorly characterized	CYTOPLASMIC
NCDO2118_RS02270	metallo-hydrolase 444935:445747 reverse MW:30538	4	1	21.3654	R	General function prediction only	Poorly characterized	CYTOPLASMIC
NCDO2118_RS10925	transcriptional regulator 2249068:2250207 reverse MW:44107	4	1	25.2769	H	Coenzyme transport and metabolism	Metabolism	CYTOPLASMIC
NCDO2118_RS10230	Unknown Function 2114204:2114572 reverse MW:14737	4	1	23.9336	S	Function unknown	Poorly characterized	CYTOPLASMIC
NCDO2118_RS10835	CDP-diacylglycerol--glycerol-3-phosphate 3-phosphatidyltransferase 2228835:2229407 reverse MW:21332	4	1	21.1686	I	Lipid transport and metabolism	Metabolism	MEMBRANE
NCDO2118_RS05430	glutaredoxin 1085909:1086127 reverse MW:8302	4	1	27.4668	O	Posttranslational modification, protein turnover, chaperones	Cellular processes and sinaling	CYTOPLASMIC
NCDO2118_RS00355	recombinase RarA 69040:70299 reverse MW:46753	4	1	26.8407	L	Replication, recombination and repair	Information storage and processing	CYTOPLASMIC
NCDO2118_RS06290	XRE family transcriptional regulator 1296681:1297391 forward MW:27022	4	1	31.85	K	Transcription	Information storage and processing	CYTOPLASMIC
NCDO2118_RS01945	transcriptional regulator 373426:373719 forward MW:11419	4	1	36.255	K	Transcription	Information storage and processing	CYTOPLASMIC
NCDO2118_RS02375	PTS cellobiose transporter subunit IIC 465057:466394 forward MW:48027	4	1	30.1498	G	Carbohydrate transport and metabolism	Metabolism	MEMBRANE
NCDO2118_RS10680	GTPase RsgA 2198979:2199902 reverse MW:34953	4	1	21.967	R	General function prediction only	Poorly characterized	CYTOPLASMIC
NCDO2118_RS11880	transcriptional regulator 2429807:2430139 forward MW:12698	4	1	23.1957	K	Transcription	Information storage and processing	CYTOPLASMIC
NCDO2118_RS04230	Unknown Function 848287:848697 forward MW:16030	4	1	21.3366	S	Function unknown	Poorly characterized	PSE
NCDO2118_RS09330	agmatine deiminase 1933065:1934165 reverse MW:41213	4	2	24.8048	E	Amino acid transport and metabolism	Metabolism	CYTOPLASMIC
NCDO2118_RS08165	CCA-adding protein 1706178:1707374 reverse MW:45782	4	2	21.3851	J	Translation, ribosomal structure and biogenesis	Information storage and processing	CYTOPLASMIC
NCDO2118_RS00870	Unknown Function 171427:171633 forward MW:7480	4	2	30.8903	S	Function unknown	Poorly characterized	CYTOPLASMIC
NCDO2118_RS07800	lacto-N-biosidase 1623844:1624821 reverse MW:37677	4	2	21.3966	G	Carbohydrate transport and metabolism	Metabolism	CYTOPLASMIC
NCDO2118_RS05735	nicotinic acid mononucleotide adenylyltransferase 1142596:1143183 reverse MW:22582	4	2	24.7084	H	Coenzyme transport and metabolism	Metabolism	CYTOPLASMIC
NCDO2118_RS10910	sodium:solute symporter 2245465:2246853 reverse MW:50665	4	2	22.9329	G	Carbohydrate transport and metabolism	Metabolism	MEMBRANE
NCDO2118_RS00340	50S ribosomal protein L32 65828:66001 reverse MW:6662	4	2	33.1588	J	Translation, ribosomal structure and biogenesis	Information storage and processing	CYTOPLASMIC
NCDO2118_RS02490	tRNA pseudouridine synthase B 1174732:1175721 forward MW:36286	4	2	16.2079	J	Translation, ribosomal structure and biogenesis	Information storage and processing	CYTOPLASMIC
NCDO2118_RS04930	Unknown Function 1000763:1001092 reverse MW:12688	4	2	33.62	S	Function unknown	Poorly characterized	CYTOPLASMIC
NCDO2118_RS02430	GntR family transcriptional regulator 480831:481547 reverse MW:27907	4	2	22.8445	K	Transcription	Information storage and processing	CYTOPLASMIC
NCDO2118_RS07320	Unknown Function 1526400:1527185 forward MW:29266	4	2	22.7735	R	General function prediction only	Poorly characterized	PSE
NCDO2118_RS04225	alkaline phosphatase 846028:848196 forward MW:81926	4	2	27.2414	M	Cell wall/membrane/envelope biogenesis	Cellular processes and sinaling	PSE
NCDO2118_RS07625	anthranilate phosphoribosyltransferase 1586463:1587470 reverse MW:35847	4	2	25.2717	E	Amino acid transport and metabolism	Metabolism	CYTOPLASMIC
NCDO2118_RS12180	phosphatase 2479256:2479693 reverse MW:16492	4	2	22.8668	T	Signal transduction mechanisms	Cellular processes and sinaling	CYTOPLASMIC
NCDO2118_RS11600	MarR family transcriptional regulator 2366653:2367090 reverse MW:16366	4	2	33.8257	K	Transcription	Information storage and processing	CYTOPLASMIC
NCDO2118_RS09540	Fe-S oxidoreductase 1975823:1976593 forward MW:28336	4	2	23.2766	C	Energy production and conversion	Metabolism	CYTOPLASMIC
NCDO2118_RS00420	hydrolase 81784:82407 forward MW:24160	4	2	21.7146	R	General function prediction only	Poorly characterized	CYTOPLASMIC
NCDO2118_RS01890	prolyl-tRNA synthetase 362576:363052 reverse MW:17477	4	2	38.7272	S	Function unknown	Poorly characterized	CYTOPLASMIC
NCDO2118_RS04620	ABC transporter ATP-binding protein 933426:934205 reverse MW:28913	4	2	20.3687	PH	Inorganic ion transport and metabolism	Metabolism	CYTOPLASMIC
NCDO2118_RS07520	pantothenate kinase 1563476:1564396 forward MW:36007	4	2	22.3104	H	Coenzyme transport and metabolism	Metabolism	CYTOPLASMIC
NCDO2118_RS05810	sortase 1161541:1162287 forward MW:27709	4	2	22.2821	M	Cell wall/membrane/envelope biogenesis	Cellular processes and sinaling	PSE
NCDO2118_RS00660	1,4-alpha-glucan-branching protein 122287:124233 reverse MW:75418	4	2	21.6099	G	Carbohydrate transport and metabolism	Metabolism	CYTOPLASMIC
NCDO2118_RS03250	ribonuclease Z 624538:625461 forward MW:34015	4	3	22.9796	R	General function prediction only	Poorly characterized	CYTOPLASMIC
NCDO2118_RS00855	acetyltransferase 167241:168293 forward MW:40658	4	3	21.1138	R	General function prediction only	Poorly characterized	CYTOPLASMIC
NCDO2118_RS01125	nicotinic acid mononucleotide adenylyltransferase 221511:222110 forward MW:22601	4	3	32.5513	H	Coenzyme transport and metabolism	Metabolism	CYTOPLASMIC
NCDO2118_RS09030	thioredoxin 1868323:1868637 reverse MW:11672	4	3	21.1439	OC	Posttranslational modification, protein turnover, chaperones	Cellular processes and sinaling	CYTOPLASMIC
NCDO2118_RS12025	Unknown Function 2461231:2461503 forward MW:10777	4	3	22.5895	E	Amino acid transport and metabolism	Metabolism	CYTOPLASMIC
NCDO2118_RS03935	Unknown Function 786819:787076 forward MW:9834	4	3	37.1656	S	Function unknown	Poorly characterized	CYTOPLASMIC
NCDO2118_RS10320	cell division protein SepF 2133203:2133793 reverse MW:21869	4	3	36.0162	S	Function unknown	Poorly characterized	CYTOPLASMIC
NCDO2118_RS07935	TetR family transcriptional regulator 1661224:1661850 forward MW:24120	4	3	22.3945	K	Transcription	Information storage and processing	CYTOPLASMIC
NCDO2118_RS04915	Unknown Function 999690:1000025 reverse MW:12585	4	3	34.0132	K	Transcription	Information storage and processing	CYTOPLASMIC
NCDO2118_RS10310	cell division protein 2132140:2132931 reverse MW:30484	4	3	26.9822	S	Function unknown	Poorly characterized	CYTOPLASMIC
NCDO2118_RS10930	dehydrogenase 2250194:2251171 reverse MW:36569	4	3	30.692	HE	Coenzyme transport and metabolism	Metabolism	CYTOPLASMIC
NCDO2118_RS01260	dihydroxyacetone kinase subunit DhaM 243881:244252 forward MW:13394	4	4	54.9035	S	Function unknown	Poorly characterized	CYTOPLASMIC
NCDO2118_RS10440	Unknown Function 2155774:2156334 reverse MW:21500	4	4	27.86	S	Function unknown	Poorly characterized	MEMBRANE
NCDO2118_RS09025	Unknown Function 1867876:1868079 reverse MW:7224	4	4	30.6962	S	Function unknown	Poorly characterized	CYTOPLASMIC
NCDO2118_RS04340	ABC transporter permease 874106:876757 reverse MW:99503	4	4	24.011	S	Function unknown	Poorly characterized	PSE
NCDO2118_RS02145	gamma-aminobutyrate permease 416710:418143 forward MW:51969	5	1	33.4423	E	Amino acid transport and metabolism	Metabolism	MEMBRANE
NCDO2118_RS03660	Xaa-Pro aminopeptidase 718878:719936 forward MW:39454	5	1	25.714	E	Amino acid transport and metabolism	Metabolism	PSE
NCDO2118_RS09970	Unknown Function 2070527:2070898 forward MW:14274	5	1	40.6641	S	Function unknown	Poorly characterized	PSE
NCDO2118_RS02850	3-hydroxyacyl-ACP dehydratase 552795:553250 reverse MW:16796	5	2	29.0589	I	Lipid transport and metabolism	Metabolism	CYTOPLASMIC
NCDO2118_RS03915	haloacid dehalogenase 782076:782744 forward MW:25312	5	2	27.9309	R	General function prediction only	Poorly characterized	CYTOPLASMIC
NCDO2118_RS11930	recombinase RecX 2441105:2441917 forward MW:31340	5	2	23.5203	R	General function prediction only	Poorly characterized	CYTOPLASMIC
NCDO2118_RS08845	Unknown Function 1827730:1827954 reverse MW:8306	5	2	33.0367	S	Function unknown	Poorly characterized	CYTOPLASMIC
NCDO2118_RS08195	16S rRNA-processing protein RimM 1711190:1711705 reverse MW:19671	5	2	30.1855	J	Translation, ribosomal structure and biogenesis	Information storage and processing	CYTOPLASMIC
NCDO2118_RS01030	glycosyl transferase 201121:202095 forward MW:38155	5	2	29.0082	R	General function prediction only	Poorly characterized	CYTOPLASMIC
NCDO2118_RS08140	antibiotic ABC transporter ATP-binding protein 1699728:1701599 reverse MW:70430	5	2	29.834	R	General function prediction only	Poorly characterized	CYTOPLASMIC
NCDO2118_RS11280	GNAT family acetyltransferase 2320334:2320828 forward MW:18491	5	2	46.1799	KR	Transcription	Information storage and processing	CYTOPLASMIC
NCDO2118_RS11190	arginine repressor 2297410:2297868 forward MW:16893	5	2	32.801	K	Transcription	Information storage and processing	CYTOPLASMIC
NCDO2118_RS07600	tryptophan synthase subunit alpha 1582026:1582787 reverse MW:27686	5	2	28.5289	E	Amino acid transport and metabolism	Metabolism	CYTOPLASMIC
NCDO2118_RS00350	chromosome partitioning protein ParB 68199:68984 reverse MW:29742	5	3	36.2799	K	Transcription	Information storage and processing	CYTOPLASMIC
NCDO2118_RS07170	branched-chain amino acid ABC transporter permease 1496207:1497301 forward MW:38834	5	3	31.717	R	General function prediction only	Poorly characterized	MEMBRANE
NCDO2118_RS04060	3-oxoacyl-ACP synthase 813018:813995 forward MW:34877	5	3	31.2872	I	Lipid transport and metabolism	Metabolism	CYTOPLASMIC
NCDO2118_RS08490	Unknown Function 1775121:1775813 reverse MW:26900	5	3	35.0871	S	Function unknown	Poorly characterized	CYTOPLASMIC
NCDO2118_RS02905	ATPase P 561036:563363 forward MW:85598	5	3	26.9963	P	Inorganic ion transport and metabolism	Metabolism	MEMBRANE
NCDO2118_RS11715	Unknown Function 2390379:2390603 forward MW:8619	5	3	54.1202	S	Function unknown	Poorly characterized	CYTOPLASMIC
NCDO2118_RS12340	Unknown Function 2510367:2510570 reverse MW:7622	5	3	28.3875	S	Function unknown	Poorly characterized	CYTOPLASMIC
NCDO2118_RS00685	polysaccharide biosynthesis protein 134752:135531 forward MW:28163	5	3	34.7284	M	Cell wall/membrane/envelope biogenesis	Cellular processes and sinaling	PSE
NCDO2118_RS11685	preprotein translocase subunit YajC 2384456:2384788 reverse MW:11914	5	3	29.2068	U	Intracellular trafficking, secretion, and vesicular transport	Cellular processes and sinaling	MEMBRANE
NCDO2118_RS06785	SMC-Scp complex subunit ScpB 1407412:1407978 reverse MW:21060	5	3	25.2747	K	Transcription	Information storage and processing	CYTOPLASMIC
NCDO2118_RS04540	phospho-N-acetylmuramoyl-pentapeptide transferase 917240:918229 forward MW:36256	5	3	26.0701	M	Cell wall/membrane/envelope biogenesis	Cellular processes and sinaling	MEMBRANE
NCDO2118_RS03950	NrdR family transcriptional regulator 788811:789257 forward MW:17374	5	3	40.3677	K	Transcription	Information storage and processing	CYTOPLASMIC
NCDO2118_RS05450	DNA polymerase III subunit epsilon 1089885:1090718 forward MW:32073	5	3	31.6692	L	Replication, recombination and repair	Information storage and processing	CYTOPLASMIC
NCDO2118_RS05425	protein NrdI 1085485:1085907 reverse MW:15660	5	3	20.8344	F	Nucleotide transport and metabolism	Metabolism	CYTOPLASMIC
NCDO2118_RS08065	thymidylate synthase 1688097:1688936 reverse MW:32499	5	4	41.6329	F	Nucleotide transport and metabolism	Metabolism	CYTOPLASMIC
NCDO2118_RS04170	Unknown Function 833381:833620 forward MW:8728	5	4	52.8883	S	Function unknown	Poorly characterized	CYTOPLASMIC
NCDO2118_RS02015	recombination protein RecR 386955:387551 forward MW:21909	5	4	33.2697	L	Replication, recombination and repair	Information storage and processing	CYTOPLASMIC
NCDO2118_RS07770	fructokinase 1615393:1616268 reverse MW:31266	5	4	25.6967	KG	Transcription	Information storage and processing	CYTOPLASMIC
NCDO2118_RS05860	Unknown Function 1173900:1174592 forward MW:24419	5	4	35.5115	S	Function unknown	Poorly characterized	SECRETED
NCDO2118_RS04490	cell division protein FtsJ 907258:908064 forward MW:29737	5	4	42.9194	J	Translation, ribosomal structure and biogenesis	Information storage and processing	CYTOPLASMIC
NCDO2118_RS05330	lactose transport regulator 1064078:1064779 forward MW:25879	5	4	33.424	KG	Transcription	Information storage and processing	CYTOPLASMIC
NCDO2118_RS04315	serine dehydratase subunit beta 869223:869894 forward MW:24361	5	4	28.9297	E	Amino acid transport and metabolism	Metabolism	CYTOPLASMIC
NCDO2118_RS11110	Unknown Function 2281471:2281692 forward MW:8730	5	4	34.1792	S	Function unknown	Poorly characterized	CYTOPLASMIC
NCDO2118_RS10505	biotin--[acetyl-CoA-carboxylase] synthetase 2168516:2169268 forward MW:28173	5	4	26.2655	H	Coenzyme transport and metabolism	Metabolism	CYTOPLASMIC
NCDO2118_RS07235	heptaprenyl diphosphate synthase subunit II 1508938:1509897 forward MW:35699	5	4	33.4806	H	Coenzyme transport and metabolism	Metabolism	CYTOPLASMIC
NCDO2118_RS02130	ATP-NAD kinase 413822:414646 forward MW:30868	5	4	22.0618	G	Carbohydrate transport and metabolism	Metabolism	CYTOPLASMIC
NCDO2118_RS10775	Unknown Function 2217148:2217378 forward MW:8640	5	5	55.1554	S	Function unknown	Poorly characterized	CYTOPLASMIC
NCDO2118_RS10920	glyceraldehyde 3-phosphate reductase 2247996:2249000 forward MW:37633	6	1	35.452	C	Energy production and conversion	Metabolism	CYTOPLASMIC
NCDO2118_RS04325	transcriptional regulator 870899:871354 forward MW:17134	6	1	33.755	K	Transcription	Information storage and processing	CYTOPLASMIC
NCDO2118_RS04595	universal stress protein 927907:928332 forward MW:15656	6	2	46.1822	T	Signal transduction mechanisms	Cellular processes and sinaling	CYTOPLASMIC
NCDO2118_RS09730	esterase 2014370:2015146 reverse MW:29646	6	2	33.6069	R	General function prediction only	Poorly characterized	CYTOPLASMIC
NCDO2118_RS00065	peptidyl-tRNA hydrolase 16817:17383 forward MW:20963	6	2	42.0701	J	Translation, ribosomal structure and biogenesis	Information storage and processing	CYTOPLASMIC
NCDO2118_RS04030	Unknown Function 806869:807195 forward MW:12467	6	2	39.3979	K	Transcription	Information storage and processing	CYTOPLASMIC
NCDO2118_RS03010	NADPH-flavin oxidoreductase 579760:580497 forward MW:27422	6	2	29.6281	C	Energy production and conversion	Metabolism	CYTOPLASMIC
NCDO2118_RS11555	acyltransferase 2356956:2358773 reverse MW:68281	6	2	31.5156	I	Lipid transport and metabolism	Metabolism	PSE
NCDO2118_RS09550	lactate utilization protein C 1978078:1978761 forward MW:25108	6	3	37.762	S	Function unknown	Poorly characterized	CYTOPLASMIC
NCDO2118_RS10165	tyrosine phosphatase 2100970:2101716 reverse MW:28235	6	3	39.601	T	Signal transduction mechanisms	Cellular processes and sinaling	CYTOPLASMIC
NCDO2118_RS10130	Unknown Function 2093306:2093617 reverse MW:11845	6	3	40.1452	S	Function unknown	Poorly characterized	CYTOPLASMIC
NCDO2118_RS02840	amino acid ABC transporter substrate-binding protein 550776:551597 forward MW:29018	6	3	28.6322	ET	Amino acid transport and metabolism	Metabolism	PSE
NCDO2118_RS11410	protein translocase subunit SecY 2339865:2341184 reverse MW:48456	6	3	35.098	U	Intracellular trafficking, secretion, and vesicular transport	Cellular processes and sinaling	MEMBRANE
NCDO2118_RS12350	TetR family transcriptional regulator 2515535:2516149 forward MW:23762	6	3	33.6444	K	Transcription	Information storage and processing	CYTOPLASMIC
NCDO2118_RS07720	MarR family transcriptional regulator 1602651:1603070 reverse MW:16187	6	3	38.9259	K	Transcription	Information storage and processing	CYTOPLASMIC
NCDO2118_RS07570	GntR family transcriptional regulator 1572824:1573444 reverse MW:23055	6	3	31.334	P	Inorganic ion transport and metabolism	Metabolism	CYTOPLASMIC
NCDO2118_RS02070	GTPase Era 401978:402889 forward MW:34737	6	3	38.645	R	General function prediction only	Poorly characterized	CYTOPLASMIC
NCDO2118_RS08440	histidine kinase 1766852:1768327 reverse MW:56205	6	3	32.9113	T	Signal transduction mechanisms	Cellular processes and sinaling	PSE
NCDO2118_RS02480	LytR family transcriptional regulator 489940:491325 forward MW:49464	6	3	37.0888	K	Transcription	Information storage and processing	SECRETED
NCDO2118_RS03270	DNA-directed RNA polymerase subunit delta 629401:629964 forward MW:21338	6	3	17.1507	K	Transcription	Information storage and processing	CYTOPLASMIC
NCDO2118_RS05000	Unknown Function 1007856:1008065 forward MW:7851	6	3	41.0414	S	Function unknown	Poorly characterized	CYTOPLASMIC
NCDO2118_RS09545	amino acid dehydrogenase 1976603:1978075 forward MW:54218	6	3	46.1694	C	Energy production and conversion	Metabolism	CYTOPLASMIC
NCDO2118_RS05605	SAM-dependent methyltransferase 1120140:1120832 forward MW:25907	6	3	39.7887	R	General function prediction only	Poorly characterized	CYTOPLASMIC
NCDO2118_RS10890	maltose O-acetyltransferase 2240771:2241394 reverse MW:23448	6	4	51.2183	R	General function prediction only	Poorly characterized	CYTOPLASMIC
NCDO2118_RS08765	Unknown Function 1813097:1813465 forward MW:13877	6	4	48.7192	S	Function unknown	Poorly characterized	CYTOPLASMIC
NCDO2118_RS10850	protease 2231829:2233106 reverse MW:48082	6	4	38.2694	R	General function prediction only	Poorly characterized	CYTOPLASMIC
NCDO2118_RS05670	endoribonuclease YbeY 1130770:1131258 forward MW:18769	6	4	48.8526	R	General function prediction only	Poorly characterized	CYTOPLASMIC
NCDO2118_RS06050	spermidine/putrescine import ATP-binding protein PotA 1210022:1211308 forward MW:48486	6	4	32.4687	E	Amino acid transport and metabolism	Metabolism	CYTOPLASMIC
NCDO2118_RS10480	guanylate kinase 2162136:2162753 reverse MW:23623	6	4	48.8338	F	Nucleotide transport and metabolism	Metabolism	CYTOPLASMIC
NCDO2118_RS11695	ribosomal RNA large subunit methyltransferase H 2385600:2386079 reverse MW:17838	6	4	36.6657	S	Function unknown	Poorly characterized	CYTOPLASMIC
NCDO2118_RS03665	elongation factor P 720068:720625 forward MW:20653	6	4	45.9434	J	Translation, ribosomal structure and biogenesis	Information storage and processing	CYTOPLASMIC
NCDO2118_RS11385	30S ribosomal protein S11 2337606:2337989 reverse MW:13287	6	4	57.4573	J	Translation, ribosomal structure and biogenesis	Information storage and processing	CYTOPLASMIC
NCDO2118_RS06875	GTPase 1427908:1428762 reverse MW:32316	6	4	41.7647	R	General function prediction only	Poorly characterized	CYTOPLASMIC
NCDO2118_RS05645	ribosomal protein 1126582:1126917 forward MW:12266	6	4	34.4357	J	Translation, ribosomal structure and biogenesis	Information storage and processing	CYTOPLASMIC
NCDO2118_RS03375	ATP-dependent Clp protease proteolytic subunit 657997:658596 reverse MW:22082	6	4	50.5939	OU	Posttranslational modification, protein turnover, chaperones	Cellular processes and sinaling	CYTOPLASMIC
NCDO2118_RS06810	NTP phosphatase 1410466:1411071 reverse MW:22342	6	4	45.7756	F	Nucleotide transport and metabolism	Metabolism	CYTOPLASMIC
NCDO2118_RS08890	dihydrodipicolinate synthase 1837885:1838778 reverse MW:32218	6	5	38.1973	EM	Amino acid transport and metabolism	Metabolism	CYTOPLASMIC
NCDO2118_RS02875	protein translocase component YidC 556685:557647 reverse MW:35627	6	5	36.5481	U	Intracellular trafficking, secretion, and vesicular transport	Cellular processes and sinaling	MEMBRANE
NCDO2118_RS00470	nucleoid-associated protein 92654:92953 reverse MW:11108	6	5	55.3008	S	Function unknown	Poorly characterized	CYTOPLASMIC
NCDO2118_RS06680	iron-dependent repressor 1383765:1384418 reverse MW:24964	6	5	37.0846	K	Transcription	Information storage and processing	CYTOPLASMIC
NCDO2118_RS05805	thiamine biosynthesis protein ApbE 1160338:1161423 forward MW:39662	6	5	29.6029	H	Coenzyme transport and metabolism	Metabolism	PSE
NCDO2118_RS04475	exodeoxyribonuclease 7 small subunit 904879:905118 forward MW:8964	6	5	66.9207	L	Replication, recombination and repair	Information storage and processing	CYTOPLASMIC
NCDO2118_RS10280	cysteine desulfurase 2124605:2125732 forward MW:41097	6	5	50.9993	E	Amino acid transport and metabolism	Metabolism	CYTOPLASMIC
NCDO2118_RS01830	PadR family transcriptional regulator 351138:351488 forward MW:13505	6	5	34.6919	K	Transcription	Information storage and processing	CYTOPLASMIC
NCDO2118_RS06990	acetyltransferase 1454476:1455081 reverse MW:22415	6	5	36.7474	R	General function prediction only	Poorly characterized	CYTOPLASMIC
NCDO2118_RS00615	aldo/keto reductase 116558:117469 forward MW:33891	6	5	32.2068	R	General function prediction only	Poorly characterized	CYTOPLASMIC
NCDO2118_RS05980	dihydrofolate reductase 1197476:1197982 forward MW:19666	6	5	40.3652	H	Coenzyme transport and metabolism	Metabolism	CYTOPLASMIC
NCDO2118_RS01120	RNA-binding protein 221150:221464 forward MW:11631	6	5	27.8658	J	Translation, ribosomal structure and biogenesis	Information storage and processing	CYTOPLASMIC
NCDO2118_RS09915	Unknown Function 2056941:2057201 reverse MW:9914	6	6	47.553	S	Function unknown	Poorly characterized	CYTOPLASMIC
NCDO2118_RS11240	glycerol uptake permease 2310384:2311253 reverse MW:30949	6	6	52.9832	G	Carbohydrate transport and metabolism	Metabolism	MEMBRANE
NCDO2118_RS04115	cysteine synthase 823698:824618 forward MW:32584	6	6	38.794	E	Amino acid transport and metabolism	Metabolism	CYTOPLASMIC
NCDO2118_RS04690	hydrolase 949093:949899 forward MW:30255	6	6	45.6935	R	General function prediction only	Poorly characterized	CYTOPLASMIC
NCDO2118_RS02955	Unknown Function 570689:570973 forward MW:10835	7	2	32.2199	S	Function unknown	Poorly characterized	CYTOPLASMIC
NCDO2118_RS10745	pyridoxamine 5'-phosphate oxidase 2212987:2213484 reverse MW:18995	7	2	43.2031	R	General function prediction only	Poorly characterized	CYTOPLASMIC
NCDO2118_RS12485	ribonuclease HIII 2538777:2539655 forward MW:32205	7	2	41.5493	L	Replication, recombination and repair	Information storage and processing	CYTOPLASMIC
NCDO2118_RS00390	16S rRNA methyltransferase 75036:75788 forward MW:27884	7	2	39.5781	S	Function unknown	Poorly characterized	CYTOPLASMIC
NCDO2118_RS01450	N5-(carboxyethyl)ornithine synthase 279330:280268 forward MW:35224	7	2	40.6429	E	Amino acid transport and metabolism	Metabolism	CYTOPLASMIC
NCDO2118_RS12155	phage protein 2475967:2476686 forward MW:28430	7	3	52.7747	S	Function unknown	Poorly characterized	CYTOPLASMIC
NCDO2118_RS09845	Fe-S cluster assembly ATPase SufC 2036292:2037062 reverse MW:28425	7	3	60.7039	O	Posttranslational modification, protein turnover, chaperones	Cellular processes and sinaling	CYTOPLASMIC
NCDO2118_RS05410	cell division protein FtsX 1080759:1081694 forward MW:34670	7	3	43.9054	D	Cell cycle control, cell division, chromosome partitioning	Cellular processes and sinaling	PSE
NCDO2118_RS11700	serine protease 2386455:2387681 forward MW:41638	7	3	38.1555	O	Posttranslational modification, protein turnover, chaperones	Cellular processes and sinaling	SECRETED
NCDO2118_RS01160	transcriptional regulator 226395:227111 forward MW:25851	7	3	49.3666	S	Function unknown	Poorly characterized	CYTOPLASMIC
NCDO2118_RS09195	transcriptional regulator 1903989:1904666 reverse MW:25850	7	3	38.3122	TK	Signal transduction mechanisms	Cellular processes and sinaling	CYTOPLASMIC
NCDO2118_RS04775	transcriptional regulator 967960:968424 forward MW:17755	7	3	48.5701	K	Transcription	Information storage and processing	CYTOPLASMIC
NCDO2118_RS03055	acylphosphatase 588280:588573 reverse MW:10935	7	3	38.8142	C	Energy production and conversion	Metabolism	CYTOPLASMIC
NCDO2118_RS02010	penicillin-binding protein 2B 384651:386816 forward MW:77843	7	3	44.0724	M	Cell wall/membrane/envelope biogenesis	Cellular processes and sinaling	PSE
NCDO2118_RS00735	exopolysaccharide biosynthesis protein 144762:145652 forward MW:32774	7	4	43.0227	G	Carbohydrate transport and metabolism	Metabolism	PSE
NCDO2118_RS09860	glutamate ABC transporter ATP-binding protein 2039402:2040136 reverse MW:27077	7	4	48.6923	E	Amino acid transport and metabolism	Metabolism	CYTOPLASMIC
NCDO2118_RS11655	Unknown Function 2377432:2377968 reverse MW:20730	7	4	32.6741	S	Function unknown	Poorly characterized	MEMBRANE
NCDO2118_RS09045	ferredoxin--NADP reductase 1871829:1872794 reverse MW:35062	7	4	39.6142	O	Posttranslational modification, protein turnover, chaperones	Cellular processes and sinaling	CYTOPLASMIC
NCDO2118_RS00410	D-aminoacyl-tRNA deacylase 80338:80793 forward MW:16532	7	4	50.443	J	Translation, ribosomal structure and biogenesis	Information storage and processing	CYTOPLASMIC
NCDO2118_RS06005	GTP cyclohydrolase 1200528:1201577 forward MW:40347	7	4	54.0185	H	Coenzyme transport and metabolism	Metabolism	CYTOPLASMIC
NCDO2118_RS01045	glycosyltransferase 205511:206236 forward MW:27265	7	4	58.2606	M	Cell wall/membrane/envelope biogenesis	Cellular processes and sinaling	CYTOPLASMIC
NCDO2118_RS04290	6-phospho-beta-glucosidase 862634:863995 forward MW:52770	7	4	42.2734	G	Carbohydrate transport and metabolism	Metabolism	CYTOPLASMIC
NCDO2118_RS09110	uridine kinase 1886469:1887089 reverse MW:23722	7	4	45.2868	F	Nucleotide transport and metabolism	Metabolism	CYTOPLASMIC
NCDO2118_RS05615	Unknown Function 1121641:1122006 reverse MW:13564	7	5	64.9452	S	Function unknown	Poorly characterized	CYTOPLASMIC
NCDO2118_RS03050	phosphoserine phosphatase 587511:588161 forward MW:23458	7	5	44.3907	E	Amino acid transport and metabolism	Metabolism	CYTOPLASMIC
NCDO2118_RS12220	Unknown Function 2487886:2488581 reverse MW:26392	7	5	53.4884	S	Function unknown	Poorly characterized	MEMBRANE
NCDO2118_RS12175	glutamine synthetase 2478790:2479155 reverse MW:14036	7	5	57.2024	K	Transcription	Information storage and processing	CYTOPLASMIC
NCDO2118_RS08190	tRNA (guanine-N1)-methyltransferase 1710442:1711185 reverse MW:28219	7	5	43.6127	J	Translation, ribosomal structure and biogenesis	Information storage and processing	CYTOPLASMIC
NCDO2118_RS11660	NADH oxidase 2377974:2379305 reverse MW:49584	7	5	38.0701	R	General function prediction only	Poorly characterized	CYTOPLASMIC
NCDO2118_RS00590	transcriptional regulator 113195:113770 forward MW:22099	7	5	38.018	K	Transcription	Information storage and processing	CYTOPLASMIC
NCDO2118_RS07415	universal stress protein 1546075:1546500 reverse MW:15683	7	5	61.4545	T	Signal transduction mechanisms	Cellular processes and sinaling	CYTOPLASMIC
NCDO2118_RS04035	Unknown Function 807198:807503 forward MW:11070	7	5	42.4716	J	Translation, ribosomal structure and biogenesis	Information storage and processing	CYTOPLASMIC
NCDO2118_RS01040	Unknown Function 203877:205421 forward MW:58561	7	5	43.7153	S	Function unknown	Poorly characterized	MEMBRANE
NCDO2118_RS11705	glycosyltransferase 2387807:2388805 forward MW:37970	7	5	50.4931	M	Cell wall/membrane/envelope biogenesis	Cellular processes and sinaling	CYTOPLASMIC
NCDO2118_RS01805	thiol peroxidase 344355:344837 forward MW:17440	7	6	72.9129	O	Posttranslational modification, protein turnover, chaperones	Cellular processes and sinaling	CYTOPLASMIC
NCDO2118_RS00790	glycosyltransferase 153185:154768 forward MW:58327	7	6	63.8614	R	General function prediction only	Poorly characterized	MEMBRANE
NCDO2118_RS01275	TetR family transcriptional regulator 246572:247219 forward MW:24305	7	6	38.9695	K	Transcription	Information storage and processing	CYTOPLASMIC
NCDO2118_RS00385	50S ribosomal protein L11 methyltransferase 73983:74936 forward MW:34841	7	6	36.5204	J	Translation, ribosomal structure and biogenesis	Information storage and processing	CYTOPLASMIC
NCDO2118_RS01730	Unknown Function 331214:331867 reverse MW:23853	7	6	49.587	S	Function unknown	Poorly characterized	PSE
NCDO2118_RS03690	glucose-1-phosphate adenylyltransferase 725589:726728 forward MW:42663	7	7	34.5119	G	Carbohydrate transport and metabolism	Metabolism	CYTOPLASMIC
NCDO2118_RS06850	potassium transporter KefA 1421703:1422449 forward MW:27669	7	7	49.8275	M	Cell wall/membrane/envelope biogenesis	Cellular processes and sinaling	MEMBRANE
NCDO2118_RS07645	NAD(P)H nitroreductase 1590382:1591020 reverse MW:24263	7	7	40.9467	C	Energy production and conversion	Metabolism	CYTOPLASMIC
NCDO2118_RS03965	primosomal protein DnaI 790819:791700 forward MW:33903	8	2	45.1191	L	Replication, recombination and repair	Information storage and processing	CYTOPLASMIC
NCDO2118_RS02420	Unknown Function 478392:479351 forward MW:34599	8	3	54.7114	S	Function unknown	Poorly characterized	SECRETED
NCDO2118_RS00915	nitroreductase 179710:180321 forward MW:23260	8	3	60.6522	C	Energy production and conversion	Metabolism	CYTOPLASMIC
NCDO2118_RS00880	aryl-phospho-beta-D-glucosidase 171956:173392 forward MW:54702	8	3	48.9734	G	Carbohydrate transport and metabolism	Metabolism	CYTOPLASMIC
NCDO2118_RS09505	Unknown Function 1967170:1967853 reverse MW:25702	8	3	48.1235	R	General function prediction only	Poorly characterized	CYTOPLASMIC
NCDO2118_RS02310	Unknown Function 451965:452156 reverse MW:7454	8	3	51.6142	S	Function unknown	Poorly characterized	CYTOPLASMIC
NCDO2118_RS06950	cytosine methyltransferase 1446221:1447183 partial 3' reverse MW:36536	8	3	57.2994	L	Replication, recombination and repair	Information storage and processing	CYTOPLASMIC
NCDO2118_RS08770	Unknown Function 1813805:1814329 forward MW:19756	8	4	57.2803	S	Function unknown	Poorly characterized	CYTOPLASMIC
NCDO2118_RS02450	beta-phosphoglucomutase 486368:487033 forward MW:24210	8	4	56.5138	R	General function prediction only	Poorly characterized	CYTOPLASMIC
NCDO2118_RS01740	Unknown Function 333942:334172 reverse MW:8841	8	4	51.8307	S	Function unknown	Poorly characterized	CYTOPLASMIC
NCDO2118_RS06035	homoserine kinase 1206685:1207575 forward MW:31908	8	4	56.2418	E	Amino acid transport and metabolism	Metabolism	CYTOPLASMIC
NCDO2118_RS04455	ATPase 899908:901986 reverse MW:75738	8	4	32.982	P	Inorganic ion transport and metabolism	Metabolism	MEMBRANE
NCDO2118_RS06960	DNA methyltransferase 1448583:1449626 reverse MW:39406	8	4	41.1106	L	Replication, recombination and repair	Information storage and processing	CYTOPLASMIC
NCDO2118_RS07685	oxidoreductase 1595871:1596602 forward MW:26331	8	4	41.3917	R	General function prediction only	Poorly characterized	CYTOPLASMIC
NCDO2118_RS06045	UDP-N-acetylenolpyruvoylglucosamine reductase 1208471:1209370 forward MW:32117	8	4	47.0774	M	Cell wall/membrane/envelope biogenesis	Cellular processes and sinaling	CYTOPLASMIC
NCDO2118_RS00100	tRNA(Ile)-lysidine synthetase 24096:25367 forward MW:49545	8	4	47.7334	D	Cell cycle control, cell division, chromosome partitioning	Cellular processes and sinaling	CYTOPLASMIC
NCDO2118_RS06030	homoserine dehydrogenase 1205394:1206680 forward MW:46921	8	5	52.7267	E	Amino acid transport and metabolism	Metabolism	CYTOPLASMIC
NCDO2118_RS11400	translation initiation factor IF-1 2338563:2338781 reverse MW:8177	8	5	40.914	J	Translation, ribosomal structure and biogenesis	Information storage and processing	CYTOPLASMIC
NCDO2118_RS10845	zinc protease 2230556:2231839 reverse MW:49308	8	5	50.5458	R	General function prediction only	Poorly characterized	CYTOPLASMIC
NCDO2118_RS08220	3-hydroxy-3-methylglutaryl-CoA reductase 1714748:1715980 reverse MW:45035	8	5	50.1638	I	Lipid transport and metabolism	Metabolism	CYTOPLASMIC
NCDO2118_RS11160	carbamate kinase 2290194:2291138 reverse MW:33795	8	5	62.8342	E	Amino acid transport and metabolism	Metabolism	SECRETED
NCDO2118_RS04065	acyl carrier protein 814162:814383 forward MW:8401	8	5	51.3798	IQ	Lipid transport and metabolism	Metabolism	CYTOPLASMIC
NCDO2118_RS11830	peptidase S16 2419851:2420879 reverse MW:37350	8	6	50.3705	T	Signal transduction mechanisms	Cellular processes and sinaling	PSE
NCDO2118_RS05870	riboflavin biosynthesis protein RibF 1175752:1176654 forward MW:34258	8	6	50.5739	H	Coenzyme transport and metabolism	Metabolism	CYTOPLASMIC
NCDO2118_RS07025	Unknown Function 1460852:1461049 reverse MW:7537	8	6	72.4693	S	Function unknown	Poorly characterized	CYTOPLASMIC
NCDO2118_RS11460	50S ribosomal protein L24 2346161:2346466 reverse MW:10876	8	6	36.9919	J	Translation, ribosomal structure and biogenesis	Information storage and processing	CYTOPLASMIC
NCDO2118_RS04360	uridine phosphorylase 880607:881323 forward MW:25856	8	6	44.6193	F	Nucleotide transport and metabolism	Metabolism	CYTOPLASMIC
NCDO2118_RS11365	UDP-N-acetylmuramoyl-tripeptide--D-alanyl-D- alanine ligase 2334327:2335526 reverse MW:46459	8	6	62.9113	V	Defense mechanisms	Cellular processes and sinaling	CYTOPLASMIC
NCDO2118_RS07325	23S rRNA pseudouridylate synthase 1527215:1527751 reverse MW:20348	8	6	47.8155	J	Translation, ribosomal structure and biogenesis	Information storage and processing	CYTOPLASMIC
NCDO2118_RS07420	transcriptional regulator 1546920:1548050 reverse MW:43714	8	6	54.5841	E	Amino acid transport and metabolism	Metabolism	CYTOPLASMIC
NCDO2118_RS11575	FMN-binding protein 2362612:2362989 reverse MW:14130	8	6	58.6432	R	General function prediction only	Poorly characterized	CYTOPLASMIC
NCDO2118_RS03380	Unknown Function 658793:659323 forward MW:20971	8	6	50.0564	S	Function unknown	Poorly characterized	MEMBRANE
NCDO2118_RS10140	Unknown Function 2094792:2095235 reverse MW:16229	8	7	59.795	S	Function unknown	Poorly characterized	PSE
NCDO2118_RS12205	Holliday junction DNA helicase RuvB 2483953:2484954 reverse MW:37633	8	7	46.0074	L	Replication, recombination and repair	Information storage and processing	CYTOPLASMIC
NCDO2118_RS09620	ABC transporter permease 1991614:1993614 reverse MW:74991	8	7	47.9081	V	Defense mechanisms	Cellular processes and sinaling	PSE
NCDO2118_RS04615	aromatic ring hydroxylating protein 932131:932463 forward MW:12471	8	7	43.6346	R	General function prediction only	Poorly characterized	CYTOPLASMIC
NCDO2118_RS05715	glycine--tRNA ligase subunit alpha 1137824:1138777 forward MW:36115	8	7	67.5999	J	Translation, ribosomal structure and biogenesis	Information storage and processing	CYTOPLASMIC
NCDO2118_RS09840	Fe-S cluster assembly protein SufD 2034898:2036154 reverse MW:45464	8	7	42.3067	O	Posttranslational modification, protein turnover, chaperones	Cellular processes and sinaling	CYTOPLASMIC
NCDO2118_RS01255	dihydroxyacetone kinase 243306:243884 forward MW:20566	8	7	60.033	G	Carbohydrate transport and metabolism	Metabolism	CYTOPLASMIC
NCDO2118_RS03855	2-succinyl-5-enolpyruvyl-6-hydroxy-3- cyclohexene-1-carboxylate synthase 768215:769897 reverse MW:62538	8	8	49.757	H	Coenzyme transport and metabolism	Metabolism	CYTOPLASMIC
NCDO2118_RS11960	gluconokinase 2448833:2450344 reverse MW:56163	9	2	50.4313	G	Carbohydrate transport and metabolism	Metabolism	CYTOPLASMIC
NCDO2118_RS05630	Unknown Function 1124526:1124927 forward MW:15589	9	3	69.1915	S	Function unknown	Poorly characterized	CYTOPLASMIC
NCDO2118_RS06870	ribonuclease HII 1427020:1427796 reverse MW:28405	9	3	57.4169	L	Replication, recombination and repair	Information storage and processing	CYTOPLASMIC
NCDO2118_RS00300	O-acetylhomoserine aminocarboxypropyltransferase 59566:60846 reverse MW:46257	9	3	53.3075	E	Amino acid transport and metabolism	Metabolism	CYTOPLASMIC
NCDO2118_RS03360	citrate synthase 652804:654129 forward MW:50495	9	4	52.3871	C	Energy production and conversion	Metabolism	CYTOPLASMIC
NCDO2118_RS01340	GTPase 261590:262243 forward MW:23744	9	4	49.3674	S	Function unknown	Poorly characterized	PSE
NCDO2118_RS01685	2,3,4,5-tetrahydropyridine-2,6-dicarboxylate N-acetyltransferase 321906:322676 forward MW:26777	9	4	45.85	E	Amino acid transport and metabolism	Metabolism	CYTOPLASMIC
NCDO2118_RS12510	30S ribosomal protein S12 2544389:2544802 reverse MW:15124	9	4	65.2344	J	Translation, ribosomal structure and biogenesis	Information storage and processing	CYTOPLASMIC
NCDO2118_RS05210	Unknown Function 1039768:1040094 forward MW:11941	9	4	54.4404	S	Function unknown	Poorly characterized	CYTOPLASMIC
NCDO2118_RS07255	dihydroorotate dehydrogenase 1512026:1512961 reverse MW:32888	9	5	57.5869	F	Nucleotide transport and metabolism	Metabolism	CYTOPLASMIC
NCDO2118_RS03165	Unknown Function 608913:609716 forward MW:31369	9	5	60.8622	S	Function unknown	Poorly characterized	CYTOPLASMIC
NCDO2118_RS11120	NADH dehydrogenase 2282699:2283085 forward MW:14294	9	5	59.9926	P	Inorganic ion transport and metabolism	Metabolism	CYTOPLASMIC
NCDO2118_RS05650	50S ribosomal protein L27 1126919:1127203 forward MW:10033	9	5	82.8777	J	Translation, ribosomal structure and biogenesis	Information storage and processing	CYTOPLASMIC
NCDO2118_RS03735	ArsR family transcriptional regulator 741727:742602 forward MW:34414	9	5	50.1025	K	Transcription	Information storage and processing	CYTOPLASMIC
NCDO2118_RS02525	Unknown Function 498337:499209 reverse MW:33431	9	6	52.4435	S	Function unknown	Poorly characterized	MEMBRANE
NCDO2118_RS09015	3-dehydroquinate dehydratase 1866933:1867613 reverse MW:25974	9	6	49.5875	E	Amino acid transport and metabolism	Metabolism	CYTOPLASMIC
NCDO2118_RS02890	phosphopantothenoylcysteine decarboxylase 559283:559819 reverse MW:19419	9	6	83.8777	H	Coenzyme transport and metabolism	Metabolism	CYTOPLASMIC
NCDO2118_RS10450	methionyl-tRNA formyltransferase 2156779:2157738 reverse MW:35165	9	6	59.9589	J	Translation, ribosomal structure and biogenesis	Information storage and processing	CYTOPLASMIC
NCDO2118_RS11480	50S ribosomal protein L16 2347481:2347894 reverse MW:15357	9	6	62.7938	J	Translation, ribosomal structure and biogenesis	Information storage and processing	CYTOPLASMIC
NCDO2118_RS09760	acetyltransferase 2021231:2021794 reverse MW:21644	9	6	66.6184	M	Cell wall/membrane/envelope biogenesis	Cellular processes and sinaling	CYTOPLASMIC
NCDO2118_RS12320	ribose 5-phosphate isomerase 2507100:2507774 reverse MW:24540	9	6	58.5751	G	Carbohydrate transport and metabolism	Metabolism	CYTOPLASMIC
NCDO2118_RS00690	tyrosine protein kinase 135541:136236 forward MW:25127	9	6	56.0663	D	Cell cycle control, cell division, chromosome partitioning	Cellular processes and sinaling	CYTOPLASMIC
NCDO2118_RS02305	16S rRNA methyltransferase 451013:451888 forward MW:32549	9	7	53.1389	R	General function prediction only	Poorly characterized	CYTOPLASMIC
NCDO2118_RS08185	transposase 1709925:1710317 reverse MW:15026	9	7	76.2652	S	Function unknown	Poorly characterized	CYTOPLASMIC
NCDO2118_RS02935	cytochrome C5 566897:568693 forward MW:66482	9	7	50.6813	R	General function prediction only	Poorly characterized	CYTOPLASMIC
NCDO2118_RS08225	3-ketoacyl-CoA thiolase 1716061:1717200 reverse MW:39717	9	7	52.7143	I	Lipid transport and metabolism	Metabolism	CYTOPLASMIC
NCDO2118_RS08455	50S ribosomal protein L31 type B 1769845:1770090 reverse MW:9336	9	7	87.013	J	Translation, ribosomal structure and biogenesis	Information storage and processing	CYTOPLASMIC
NCDO2118_RS03155	ATP-dependent helicase 605499:607424 forward MW:72681	9	7	68.1607	L	Replication, recombination and repair	Information storage and processing	CYTOPLASMIC
NCDO2118_RS10770	tRNA-dihydrouridine synthase 2216048:2217052 forward MW:36668	9	7	61.122	J	Translation, ribosomal structure and biogenesis	Information storage and processing	CYTOPLASMIC
NCDO2118_RS03925	50S ribosomal protein L9 784799:785251 forward MW:16403	9	7	50.7107	J	Translation, ribosomal structure and biogenesis	Information storage and processing	CYTOPLASMIC
NCDO2118_RS12390	Unknown Function 2523905:2524426 reverse MW:19508	9	7	66.4998	S	Function unknown	Poorly characterized	CYTOPLASMIC
NCDO2118_RS02140	peptidylprolyl isomerase 415569:416399 reverse MW:29945	9	7	59.9149	O	Posttranslational modification, protein turnover, chaperones	Cellular processes and sinaling	PSE
NCDO2118_RS02240	thioredoxin 439757:440074 forward MW:12043	9	7	84.6152	OC	Posttranslational modification, protein turnover, chaperones	Cellular processes and sinaling	CYTOPLASMIC
NCDO2118_RS08235	glucosamine-6-phosphate deaminase 1718723:1719430 reverse MW:25621	9	7	55.5583	G	Carbohydrate transport and metabolism	Metabolism	CYTOPLASMIC
NCDO2118_RS11920	RNA methyltransferase 2436770:2438311 reverse MW:58935	9	8	60.5767	J	Translation, ribosomal structure and biogenesis	Information storage and processing	CYTOPLASMIC
NCDO2118_RS10990	Unknown Function 2261140:2261361 forward MW:8453	9	8	78.5515	S	Function unknown	Poorly characterized	CYTOPLASMIC
NCDO2118_RS03080	TetR family transcriptional regulator 592560:593186 forward MW:24337	10	2	50.7187	K	Transcription	Information storage and processing	CYTOPLASMIC
NCDO2118_RS09625	ABC transporter ATP-binding protein 1993607:1994386 reverse MW:28875	10	3	81.1499	V	Defense mechanisms	Cellular processes and sinaling	CYTOPLASMIC
NCDO2118_RS02620	aminotransferase V 514468:515613 forward MW:41801	10	3	60.6248	E	Amino acid transport and metabolism	Metabolism	CYTOPLASMIC
NCDO2118_RS02570	beta-N-acetylhexosaminidase 507759:508970 forward MW:43499	10	3	53.8521	G	Carbohydrate transport and metabolism	Metabolism	SECRETED
NCDO2118_RS05285	phage tail protein 1054645:1055124 forward MW:18657	10	4	76.0735	X	Mobilome: prophages, transposons	Cellular processes and sinaling	CYTOPLASMIC
NCDO2118_RS01655	ATPase AAA 316483:318015 reverse MW:59412	10	4	53.4845	R	General function prediction only	Poorly characterized	CYTOPLASMIC
NCDO2118_RS00910	23S rRNA (adenine(2503)-C(2))-methyltransferase RlmN 178367:179464 forward MW:41765	10	4	76.0909	R	General function prediction only	Poorly characterized	CYTOPLASMIC
NCDO2118_RS03395	cation-transporting ATPase 661767:664523 forward MW:100898	10	4	51.5531	P	Inorganic ion transport and metabolism	Metabolism	MEMBRANE
NCDO2118_RS02355	transcriptional regulator 462197:462940 forward MW:27943	10	4	55.9208	K	Transcription	Information storage and processing	CYTOPLASMIC
NCDO2118_RS11495	30S ribosomal protein S19 2348927:2349205 reverse MW:10570	10	4	56.161	J	Translation, ribosomal structure and biogenesis	Information storage and processing	CYTOPLASMIC
NCDO2118_RS09640	haloacid dehalogenase 1996251:1996847 reverse MW:23013	10	5	58.3093	R	General function prediction only	Poorly characterized	CYTOPLASMIC
NCDO2118_RS00755	queuine tRNA-ribosyltransferase 147545:148693 reverse MW:43343	10	5	53.7715	J	Translation, ribosomal structure and biogenesis	Information storage and processing	CYTOPLASMIC
NCDO2118_RS10420	protein phosphatase 2152719:2153495 reverse MW:28306	10	5	75.2475	T	Signal transduction mechanisms	Cellular processes and sinaling	CYTOPLASMIC
NCDO2118_RS02895	phosphopantothenate--cysteine ligase 559812:560507 reverse MW:26083	10	5	53.9215	H	Coenzyme transport and metabolism	Metabolism	CYTOPLASMIC
NCDO2118_RS12030	Unknown Function 2461592:2462038 reverse MW:16695	10	5	56.3815	S	Function unknown	Poorly characterized	CYTOPLASMIC
NCDO2118_RS09165	ubiquinone/menaquinone biosynthesis methyltransferase 1894893:1895633 reverse MW:27814	10	5	64.8423	H	Coenzyme transport and metabolism	Metabolism	CYTOPLASMIC
NCDO2118_RS11725	Unknown Function 2391789:2392541 reverse MW:28327	10	5	67.0704	R	General function prediction only	Poorly characterized	CYTOPLASMIC
NCDO2118_RS09530	guanine permease 1973074:1974495 reverse MW:50059	10	6	59.3505	R	General function prediction only	Poorly characterized	MEMBRANE
NCDO2118_RS11690	DNA alkylation repair protein 2384883:2385581 reverse MW:27645	10	6	53.4504	L	Replication, recombination and repair	Information storage and processing	CYTOPLASMIC
NCDO2118_RS03780	NADPH:quinone reductase 750449:751435 reverse MW:35912	10	6	70.9197	CR	Energy production and conversion	Metabolism	CYTOPLASMIC
NCDO2118_RS04145	arsenate reductase 827837:828187 forward MW:13571	10	6	57.5618	P	Inorganic ion transport and metabolism	Metabolism	CYTOPLASMIC
NCDO2118_RS09315	taurine ABC transporter ATP-binding protein 1929169:1929966 reverse MW:29815	10	6	65.2782	P	Inorganic ion transport and metabolism	Metabolism	CYTOPLASMIC
NCDO2118_RS09095	hydrolase 1883915:1884700 forward MW:29129	10	6	69.8871	R	General function prediction only	Poorly characterized	CYTOPLASMIC
NCDO2118_RS10160	penicillin acylase 2099897:2100898 reverse MW:37368	10	6	66.5669	M	Cell wall/membrane/envelope biogenesis	Cellular processes and sinaling	CYTOPLASMIC
NCDO2118_RS09580	phosphoglycerate mutase 1984404:1984997 reverse MW:22075	10	6	69.469	G	Carbohydrate transport and metabolism	Metabolism	CYTOPLASMIC
NCDO2118_RS10665	ribulose-phosphate 3-epimerase 2197784:2198434 reverse MW:23514	10	6	55.7933	G	Carbohydrate transport and metabolism	Metabolism	CYTOPLASMIC
NCDO2118_RS02470	hydrolase 488874:489320 forward MW:16934	10	6	64.3885	R	General function prediction only	Poorly characterized	CYTOPLASMIC
NCDO2118_RS03790	metal-dependent hydrolase 752838:753590 forward MW:27991	10	6	56.1226	R	General function prediction only	Poorly characterized	CYTOPLASMIC
NCDO2118_RS02335	superoxide dismutase [Mn] 456645:457265 forward MW:23254	10	7	111.898	P	Inorganic ion transport and metabolism	Metabolism	CYTOPLASMIC
NCDO2118_RS08795	carbamoyl phosphate synthase small subunit 1817541:1818614 reverse MW:39721	10	7	85.6375	EF	Amino acid transport and metabolism	Metabolism	CYTOPLASMIC
NCDO2118_RS00970	Unknown Function 190436:191095 forward MW:24447	10	7	77.8096	S	Function unknown	Poorly characterized	MEMBRANE
NCDO2118_RS01860	seryl-tRNA synthetase 357866:358084 forward MW:8403	10	7	58.8072	S	Function unknown	Poorly characterized	CYTOPLASMIC
NCDO2118_RS09075	cell division protein 1879439:1879825 reverse MW:14979	10	7	76.8374	D	Cell cycle control, cell division, chromosome partitioning	Cellular processes and sinaling	CYTOPLASMIC
NCDO2118_RS04350	tRNA-specific 2-thiouridylase MnmA 877889:879019 forward MW:41918	10	7	65.8839	J	Translation, ribosomal structure and biogenesis	Information storage and processing	CYTOPLASMIC
NCDO2118_RS11595	zinc ABC transporter substrate-binding protein 2365814:2366656 reverse MW:30684	10	7	57.538	P	Inorganic ion transport and metabolism	Metabolism	PSE
NCDO2118_RS05660	phosphate starvation protein PhoH 1129128:1130081 forward MW:35322	10	7	64.5956	T	Signal transduction mechanisms	Cellular processes and sinaling	CYTOPLASMIC
NCDO2118_RS02330	isopentenyl pyrophosphate isomerase 455444:456487 forward MW:38790	10	7	66.9778	C	Energy production and conversion	Metabolism	CYTOPLASMIC
NCDO2118_RS00625	Holliday junction DNA helicase 118055:118486 forward MW:15607	10	8	68.0515	L	Replication, recombination and repair	Information storage and processing	CYTOPLASMIC
NCDO2118_RS01105	GTPase 218050:219204 forward MW:42666	10	8	52.1306	R	General function prediction only	Poorly characterized	CYTOPLASMIC
NCDO2118_RS02365	PTS cellobiose transporter subunit IIA 463593:463943 forward MW:12814	10	8	78.3971	G	Carbohydrate transport and metabolism	Metabolism	PSE
NCDO2118_RS07335	glutathione peroxidase 1531693:1532166 reverse MW:17993	10	8	51.9856	O	Posttranslational modification, protein turnover, chaperones	Cellular processes and sinaling	CYTOPLASMIC
NCDO2118_RS11900	aldose 1-epimerase 2434436:2434684 reverse MW:9650	10	8	77.3831	R	General function prediction only	Poorly characterized	CYTOPLASMIC
NCDO2118_RS04085	acetyl-CoA carboxylase biotin carboxyl carrier protein 817683:818150 forward MW:16386	10	8	61.3098	I	Lipid transport and metabolism	Metabolism	CYTOPLASMIC
NCDO2118_RS04090	3-hydroxyacyl-ACP dehydratase 818277:818711 forward MW:15923	10	9	80.1982	I	Lipid transport and metabolism	Metabolism	CYTOPLASMIC
NCDO2118_RS10895	peptidase S24 2241435:2242916 reverse MW:56591	10	9	68.1229	G	Carbohydrate transport and metabolism	Metabolism	CYTOPLASMIC
NCDO2118_RS09375	PTS mannose transporter subunit IIC 1942298:1943110 forward MW:27562	10	9	58.1999	G	Carbohydrate transport and metabolism	Metabolism	MEMBRANE
NCDO2118_RS02200	FMN-dependent NADH-azoreductase 2 430492:431097 forward MW:21913	10	9	87.995	I	Lipid transport and metabolism	Metabolism	CYTOPLASMIC
NCDO2118_RS12465	30S ribosomal protein S9 2535654:2536046 reverse MW:14098	10	9	58.8649	J	Translation, ribosomal structure and biogenesis	Information storage and processing	CYTOPLASMIC
NCDO2118_RS01680	thiol-disulfide isomerase 321085:321696 forward MW:23316	10	9	56.2168	OC	Posttranslational modification, protein turnover, chaperones	Cellular processes and sinaling	CYTOPLASMIC
NCDO2118_RS04665	LytR family transcriptional regulator 944979:946205 partial 3' forward MW:44362	11	3	80.8853	K	Transcription	Information storage and processing	PSE
NCDO2118_RS06105	cardiolipin synthase 1218196:1219644 forward MW:55624	11	3	61.884	I	Lipid transport and metabolism	Metabolism	PSE
NCDO2118_RS02630	peptide ABC transporter substrate-binding protein 516655:518304 reverse MW:59913	11	3	57.5965	E	Amino acid transport and metabolism	Metabolism	PSE
NCDO2118_RS05305	HrcA family transcriptional regulator 1057268:1058311 forward MW:39863	11	3	60.8309	K	Transcription	Information storage and processing	CYTOPLASMIC
NCDO2118_RS01965	ferrichrome ABC transporter substrate-binding protein 376390:377331 forward MW:34337	11	4	69.6615	P	Inorganic ion transport and metabolism	Metabolism	PSE
NCDO2118_RS10340	Unknown Function 2137323:2138192 reverse MW:31549	11	5	68.4797	S	Function unknown	Poorly characterized	CYTOPLASMIC
NCDO2118_RS05960	xanthine phosphoribosyltransferase 1194061:1194654 forward MW:21806	11	5	60.6462	F	Nucleotide transport and metabolism	Metabolism	CYTOPLASMIC
NCDO2118_RS02380	6-phospho-beta-glucosidase 466476:467912 forward MW:55011	11	5	63.6151	G	Carbohydrate transport and metabolism	Metabolism	CYTOPLASMIC
NCDO2118_RS07475	histidine kinase 1555811:1557364 forward MW:59143	11	6	71.3824	T	Signal transduction mechanisms	Cellular processes and sinaling	PSE
NCDO2118_RS00335	50S ribosomal protein L33 65649:65798 reverse MW:5997	11	6	52.9267	J	Translation, ribosomal structure and biogenesis	Information storage and processing	CYTOPLASMIC
NCDO2118_RS10840	XRE family transcriptional regulator 2229448:2230344 reverse MW:31852	11	6	80.0395	S	Function unknown	Poorly characterized	PSE
NCDO2118_RS08215	30S ribosomal protein S16 1714387:1714659 reverse MW:10281	11	6	89.1123	J	Translation, ribosomal structure and biogenesis	Information storage and processing	CYTOPLASMIC
NCDO2118_RS02180	LysR family transcriptional regulator 425254:426075 reverse MW:31356	11	7	68.4496	K	Transcription	Information storage and processing	CYTOPLASMIC
NCDO2118_RS03910	MarR family transcriptional regulator 781472:781948 reverse MW:18811	11	7	67.5004	K	Transcription	Information storage and processing	CYTOPLASMIC
NCDO2118_RS03045	3-phosphoglycerate dehydrogenase 586291:587487 forward MW:43736	11	7	68.4447	HE	Coenzyme transport and metabolism	Metabolism	CYTOPLASMIC
NCDO2118_RS01090	glycerol-3-phosphate cytidiltransferase 214042:214479 forward MW:17097	11	7	61.8668	MI	Cell wall/membrane/envelope biogenesis	Cellular processes and sinaling	CYTOPLASMIC
NCDO2118_RS10345	rRNA methyltransferase 2138305:2139033 reverse MW:26524	11	7	90.2735	J	Translation, ribosomal structure and biogenesis	Information storage and processing	CYTOPLASMIC
NCDO2118_RS07100	manganese ABC transporter substrate-binding protein 1478835:1479776 reverse MW:35451	11	7	59.7319	P	Inorganic ion transport and metabolism	Metabolism	PSE
NCDO2118_RS04495	transcriptional regulator 908061:908507 forward MW:16871	11	8	81.9175	K	Transcription	Information storage and processing	CYTOPLASMIC
NCDO2118_RS08120	dihydroorotate dehydrogenase 1696902:1697837 reverse MW:34247	11	8	57.5234	F	Nucleotide transport and metabolism	Metabolism	CYTOPLASMIC
NCDO2118_RS11315	DNA repair protein RadA 2324788:2326152 reverse MW:49981	11	8	79.4816	O	Posttranslational modification, protein turnover, chaperones	Cellular processes and sinaling	CYTOPLASMIC
NCDO2118_RS05640	50S ribosomal protein L21 1126265:1126579 forward MW:11423	11	8	90.9569	J	Translation, ribosomal structure and biogenesis	Information storage and processing	CYTOPLASMIC
NCDO2118_RS03885	haloacid dehalogenase 775604:776992 forward MW:51538	11	8	63.422	R	General function prediction only	Poorly characterized	CYTOPLASMIC
NCDO2118_RS08450	Unknown Function 1769184:1769714 reverse MW:20449	11	8	77.6249	R	General function prediction only	Poorly characterized	CYTOPLASMIC
NCDO2118_RS11990	Single-stranded DNA-binding protein 2 2454222:2454722 reverse MW:18304	11	8	97.8804	L	Replication, recombination and repair	Information storage and processing	CYTOPLASMIC
NCDO2118_RS03025	Unknown Function 582246:582830 forward MW:21179	11	9	72.8396	J	Translation, ribosomal structure and biogenesis	Information storage and processing	CYTOPLASMIC
NCDO2118_RS11055	acetate kinase 2269607:2270794 reverse MW:43060	11	9	66.764	C	Energy production and conversion	Metabolism	CYTOPLASMIC
NCDO2118_RS10600	ribonucleotide reductase 2184227:2184544 reverse MW:12180	11	10	96.0547	R	General function prediction only	Poorly characterized	CYTOPLASMIC
NCDO2118_RS12335	universal stress protein UspA 2509910:2510347 reverse MW:15983	11	10	68.3851	T	Signal transduction mechanisms	Cellular processes and sinaling	CYTOPLASMIC
NCDO2118_RS10610	Unknown Function 2185970:2186578 reverse MW:22557	11	10	97.5425	R	General function prediction only	Poorly characterized	CYTOPLASMIC
NCDO2118_RS11305	twitching motility protein pilT 2322742:2323827 reverse MW:39647	11	10	48.8168	R	General function prediction only	Poorly characterized	MEMBRANE
NCDO2118_RS07585	6-phospho-beta-glucosidase 1577515:1578951 reverse MW:54082	12	4	65.7533	G	Carbohydrate transport and metabolism	Metabolism	CYTOPLASMIC
NCDO2118_RS11875	Unknown Function 2428789:2429634 reverse MW:30324	12	4	76.9504	MG	Cell wall/membrane/envelope biogenesis	Cellular processes and sinaling	CYTOPLASMIC
NCDO2118_RS07360	Unknown Function 1537567:1538367 reverse MW:29298	12	5	60.633	S	Function unknown	Poorly characterized
NCDO2118_RS05245	thioredoxin reductase 1045945:1046871 forward MW:33910	12	5	78.3667	O	Posttranslational modification, protein turnover, chaperones	Cellular processes and sinaling	CYTOPLASMIC
NCDO2118_RS01115	GTP-binding protein 219861:221105 forward MW:46600	12	5	65.5822	R	General function prediction only	Poorly characterized	CYTOPLASMIC
NCDO2118_RS03060	23S rRNA methyltransferase 588874:589632 forward MW:27387	12	5	79.9641	J	Translation, ribosomal structure and biogenesis	Information storage and processing	CYTOPLASMIC
NCDO2118_RS05945	haloacid dehalogenase 1191048:1191821 forward MW:28237	12	6	66.4576	G	Carbohydrate transport and metabolism	Metabolism	CYTOPLASMIC
NCDO2118_RS12020	Unknown Function 2460495:2460983 reverse MW:18275	12	6	85.1051	T	Signal transduction mechanisms	Cellular processes and sinaling	CYTOPLASMIC
NCDO2118_RS02125	GTP pyrophosphokinase 413188:413847 forward MW:25891	12	6	81.0379	S	Function unknown	Poorly characterized	CYTOPLASMIC
NCDO2118_RS08230	hydroxymethylglutaryl-CoA synthase 1717509:1718663 forward MW:42717	12	6	63.3726	I	Lipid transport and metabolism	Metabolism	CYTOPLASMIC
NCDO2118_RS08860	diguanylate cyclase 1829275:1829850 forward MW:20294	12	6	66.5875	R	General function prediction only	Poorly characterized	CYTOPLASMIC
NCDO2118_RS12310	rod shape-determining protein MreC 2505463:2506338 reverse MW:31416	12	6	94.7062	M	Cell wall/membrane/envelope biogenesis	Cellular processes and sinaling	SECRETED
NCDO2118_RS00435	transcriptional regulator 84787:85278 reverse MW:18694	12	6	77.478	K	Transcription	Information storage and processing	CYTOPLASMIC
NCDO2118_RS12210	Holliday junction DNA helicase RuvA 2485081:2485674 reverse MW:21166	12	6	71.4659	L	Replication, recombination and repair	Information storage and processing	CYTOPLASMIC
NCDO2118_RS10135	aspartate aminotransferase 2093614:2094795 reverse MW:43228	12	6	76.6181	E	Amino acid transport and metabolism	Metabolism	CYTOPLASMIC
NCDO2118_RS10475	DNA-directed RNA polymerase subunit omega 2161686:2162039 reverse MW:13434	12	6	65.0326	K	Transcription	Information storage and processing	CYTOPLASMIC
NCDO2118_RS01365	Nicotinamidase 265877:266389 forward MW:18895	12	7	83.4833	Q	Secondary metabolites biosynthesis, transport and catabolism	Metabolism	CYTOPLASMIC
NCDO2118_RS01170	uracil-DNA glycosylase 227815:228474 forward MW:24629	12	7	72.8884	L	Replication, recombination and repair	Information storage and processing	CYTOPLASMIC
NCDO2118_RS05355	Unknown Function 1070180:1071163 forward MW:35728	12	7	81.3637	S	Function unknown	Poorly characterized	CYTOPLASMIC
NCDO2118_RS05895	transcriptional regulator 1181878:1182729 forward MW:31713	12	7	66.6086	K	Transcription	Information storage and processing	CYTOPLASMIC
NCDO2118_RS05770	glutamine amidotransferase 1150157:1150942 reverse MW:29340	12	7	98.0519	R	General function prediction only	Poorly characterized	CYTOPLASMIC
NCDO2118_RS05940	acyl-ACP thioesterase 1190270:1191001 forward MW:28844	12	7	62.1962	I	Lipid transport and metabolism	Metabolism	CYTOPLASMIC
NCDO2118_RS09570	30S ribosomal protein S20 1981576:1981809 forward MW:8352	12	7	38.2291	J	Translation, ribosomal structure and biogenesis	Information storage and processing	CYTOPLASMIC
NCDO2118_RS08900	aspartate-semialdehyde dehydrogenase 1839588:1840664 reverse MW:39251	12	7	87.8701	E	Amino acid transport and metabolism	Metabolism	CYTOPLASMIC
NCDO2118_RS02055	peptide ABC transporter substrate-binding protein 396966:397907 forward MW:35015	12	7	88.0757	E	Amino acid transport and metabolism	Metabolism	CYTOPLASMIC
NCDO2118_RS10975	ABC transporter ATP-binding protein 2257853:2258623 reverse MW:28473	12	8	79.1799	V	Defense mechanisms	Cellular processes and sinaling	CYTOPLASMIC
NCDO2118_RS10375	PepC protein 2144159:2145469 reverse MW:49913	12	8	74.8945	E	Amino acid transport and metabolism	Metabolism	CYTOPLASMIC
NCDO2118_RS04715	2,3-butanediol dehydrogenase 953319:954389 forward MW:37860	12	8	91.5887	ER	Amino acid transport and metabolism	Metabolism	CYTOPLASMIC
NCDO2118_RS01695	1,4-beta-xylanase 324089:325207 forward MW:41792	12	8	82.2574	G	Carbohydrate transport and metabolism	Metabolism	SECRETED
NCDO2118_RS01350	S-ribosylhomocysteine lyase 263647:264123 reverse MW:17605	12	8	107.555	T	Signal transduction mechanisms	Cellular processes and sinaling	CYTOPLASMIC
NCDO2118_RS10410	30S ribosomal protein S15 2150391:2150660 reverse MW:10343	12	8	53.568	J	Translation, ribosomal structure and biogenesis	Information storage and processing	CYTOPLASMIC
NCDO2118_RS11965	6-phosphogluconate dehydrogenase 2450465:2451370 reverse MW:33040	12	8	77.4703	G	Carbohydrate transport and metabolism	Metabolism	CYTOPLASMIC
NCDO2118_RS06115	N-acetylmannosamine-6-phosphate 2-epimerase 1222773:1223468 reverse MW:25420	12	9	82.2642	G	Carbohydrate transport and metabolism	Metabolism	CYTOPLASMIC
NCDO2118_RS07775	N-acetylmannosamine kinase 1616371:1617252 reverse MW:31637	12	9	93.2799	KG	Transcription	Information storage and processing	CYTOPLASMIC
NCDO2118_RS02960	Unknown Function 571276:571974 reverse MW:24440	12	9	86.3044	S	Function unknown	Poorly characterized	CYTOPLASMIC
NCDO2118_RS07955	hypoxanthine phosphoribosyltransferase 1665988:1666530 reverse MW:20296	12	10	88.1649	F	Nucleotide transport and metabolism	Metabolism	CYTOPLASMIC
NCDO2118_RS02080	5-hydroxymethyluracil DNA glycosylase 404773:405591 forward MW:31305	13	2	71.5404	L	Replication, recombination and repair	Information storage and processing	CYTOPLASMIC
NCDO2118_RS06735	UDP-N-acetylglucosamine 2-epimerase 1397305:1398408 reverse MW:41526	13	3	79.5031	M	Cell wall/membrane/envelope biogenesis	Cellular processes and sinaling	CYTOPLASMIC
NCDO2118_RS07210	5-bromo-4-chloroindolyl phosphate hydrolase 1505115:1505723 reverse MW:23720	13	3	72.7736	R	General function prediction only	Poorly characterized	PSE
NCDO2118_RS05265	endonuclease 1050649:1051707 forward MW:40309	13	4	80.4153	R	General function prediction only	Poorly characterized	PSE
NCDO2118_RS03210	potassium transporter kup 617593:619608 forward MW:75445	13	6	79.8427	P	Inorganic ion transport and metabolism	Metabolism	MEMBRANE
NCDO2118_RS07470	transcriptional regulator 1555111:1555821 forward MW:27355	13	6	83.9788	TK	Signal transduction mechanisms	Cellular processes and sinaling	CYTOPLASMIC
NCDO2118_RS10325	cell division protein 2133827:2134504 reverse MW:25533	13	6	86.8957	R	General function prediction only	Poorly characterized	CYTOPLASMIC
NCDO2118_RS03930	replicative DNA helicase 785257:786624 forward MW:50475	13	7	78.4009	L	Replication, recombination and repair	Information storage and processing	CYTOPLASMIC
NCDO2118_RS06130	Unknown Function 1225529:1227136 forward MW:58682	13	7	73.9752	R	General function prediction only	Poorly characterized	CYTOPLASMIC
NCDO2118_RS09475	phosphate ABC transporter substrate-binding protein 1959675:1960526 reverse MW:30489	13	7	87.0029	P	Inorganic ion transport and metabolism	Metabolism	PSE
NCDO2118_RS07110	manganese ABC transporter ATP-binding protein 1480622:1481335 reverse MW:26756	13	7	77.7131	P	Inorganic ion transport and metabolism	Metabolism	CYTOPLASMIC
NCDO2118_RS07825	glycosyl hydrolase 1631080:1632375 reverse MW:50216	13	8	93.1273	S	Function unknown	Poorly characterized	CYTOPLASMIC
NCDO2118_RS00345	cobalt ABC transporter ATP-binding protein 66365:68146 forward MW:63361	13	8	100.999	P	Inorganic ion transport and metabolism	Metabolism	PSE
NCDO2118_RS07380	Unknown Function 1540941:1541369 reverse MW:15314	13	8	121.948	T	Signal transduction mechanisms	Cellular processes and sinaling	CYTOPLASMIC
NCDO2118_RS09920	alcohol dehydrogenase 2057222:2058244 reverse MW:35776	13	8	94.3314	R	General function prediction only	Poorly characterized	CYTOPLASMIC
NCDO2118_RS00545	thymidylate kinase 103751:104350 forward MW:23004	13	8	68.0001	F	Nucleotide transport and metabolism	Metabolism	CYTOPLASMIC
NCDO2118_RS10385	5'-methylthioadenosine/S-adenosylhomocysteine nucleosidase 2146249:2146929 reverse MW:24312	13	8	69.0234	F	Nucleotide transport and metabolism	Metabolism	CYTOPLASMIC
NCDO2118_RS03750	ABC transporter permease 743902:745674 forward MW:64747	13	9	74.9695	V	Defense mechanisms	Cellular processes and sinaling	PSE
NCDO2118_RS07200	N-acetylglucosamine-6-phosphate deacetylase 1502471:1503619 reverse MW:41211	13	10	84.6381	G	Carbohydrate transport and metabolism	Metabolism	CYTOPLASMIC
NCDO2118_RS00325	glyoxalase 63800:64969 forward MW:43300	13	10	78.3926	E	Amino acid transport and metabolism	Metabolism	CYTOPLASMIC
NCDO2118_RS11230	Unknown Function 2308424:2309203 reverse MW:29430	13	10	99.9621	S	Function unknown	Poorly characterized	CYTOPLASMIC
NCDO2118_RS08730	Unknown Function 1810039:1810539 forward MW:19075	13	11	76.0526	S	Function unknown	Poorly characterized	CYTOPLASMIC
NCDO2118_RS05850	3-demethylubiquinone-9 3-methyltransferase 1171598:1172056 forward MW:17047	14	6	107.582	S	Function unknown	Poorly characterized	CYTOPLASMIC
NCDO2118_RS09380	mannose-specific PTS system component IID 1943129:1944052 forward MW:33633	14	6	122.246	G	Carbohydrate transport and metabolism	Metabolism	MEMBRANE
NCDO2118_RS10275	Unknown Function 2123933:2124364 reverse MW:16112	14	6	98.4932	T	Signal transduction mechanisms	Cellular processes and sinaling	CYTOPLASMIC
NCDO2118_RS06170	transcriptional regulator 1235306:1235908 forward MW:22529	14	6	86.457	TK	Signal transduction mechanisms	Cellular processes and sinaling	CYTOPLASMIC
NCDO2118_RS00270	phosphate acyltransferase 53592:54587 reverse MW:34702	14	7	69.8819	I	Lipid transport and metabolism	Metabolism	CYTOPLASMIC
NCDO2118_RS09975	Unknown Function 2070961:2071881 reverse MW:35711	14	7	83.3998	S	Function unknown	Poorly characterized	CYTOPLASMIC
NCDO2118_RS01785	phosphonates import ATP-binding protein PhnC 340086:340826 forward MW:27414	14	7	80.0629	P	Inorganic ion transport and metabolism	Metabolism	CYTOPLASMIC
NCDO2118_RS01855	UDP-N-acetylglucosamine 1-carboxyvinyltransferase 2 356555:357820 forward MW:44918	14	7	94.703	M	Cell wall/membrane/envelope biogenesis	Cellular processes and sinaling	CYTOPLASMIC
NCDO2118_RS03140	DNA methyltransferase 602185:604968 forward MW:106997	14	8	67.6445	V	Defense mechanisms	Cellular processes and sinaling	CYTOPLASMIC
NCDO2118_RS09855	adapter protein MecA 2038571:2039272 reverse MW:27077	14	8	78.5476	OTN	Posttranslational modification, protein turnover, chaperones	Cellular processes and sinaling	CYTOPLASMIC
NCDO2118_RS10395	ADP-ribose pyrophosphatase 2147231:2147815 reverse MW:22246	14	8	113.977	LR	Replication, recombination and repair	Information storage and processing	CYTOPLASMIC
NCDO2118_RS01780	phosphonate ABC transporter substrate-binding protein 338918:339967 forward MW:37449	14	8	83.4076	P	Inorganic ion transport and metabolism	Metabolism	PSE
NCDO2118_RS07780	6-phospho-beta-glucosidase 1617289:1618716 reverse MW:55521	14	8	89.1457	G	Carbohydrate transport and metabolism	Metabolism	CYTOPLASMIC
NCDO2118_RS09710	F0F1 ATP synthase subunit delta 2012162:2012689 reverse MW:19129	14	8	106.74	C	Energy production and conversion	Metabolism	CYTOPLASMIC
NCDO2118_RS04720	acetoin reductase 954415:955176 forward MW:26910	14	8	133.818	IQR	Lipid transport and metabolism	Metabolism	CYTOPLASMIC
NCDO2118_RS05320	Unknown Function 1060988:1062751 forward MW:67157	14	8	97.997	S	Function unknown	Poorly characterized	PSE
NCDO2118_RS01075	sugar transferase 210918:211919 forward MW:38422	14	9	94.8937	M	Cell wall/membrane/envelope biogenesis	Cellular processes and sinaling	CYTOPLASMIC
NCDO2118_RS00195	acetyltransferase 38155:38676 forward MW:19369	14	9	98.7156	R	General function prediction only	Poorly characterized	CYTOPLASMIC
NCDO2118_RS04760	Unknown Function 965883:966071 forward MW:7000	14	9	92.8298	S	Function unknown	Poorly characterized	CYTOPLASMIC
NCDO2118_RS05725	Unknown Function 1140909:1141151 forward MW:9216	14	9	92.7908	S	Function unknown	Poorly characterized	CYTOPLASMIC
NCDO2118_RS05415	ribonucleoside-diphosphate reductase 1081796:1082773 reverse MW:37601	14	9	87.6828	F	Nucleotide transport and metabolism	Metabolism	CYTOPLASMIC
NCDO2118_RS12490	signal peptidase 2539667:2540293 forward MW:23593	14	9	87.7	U	Intracellular trafficking, secretion, and vesicular transport	Cellular processes and sinaling	PSE
NCDO2118_RS04250	haloacid dehalogenase 852431:853240 forward MW:30244	14	9	105.585	R	General function prediction only	Poorly characterized	CYTOPLASMIC
NCDO2118_RS10650	aldose 1-epimerase 2194016:2194885 reverse MW:33430	14	9	84.1445	G	Carbohydrate transport and metabolism	Metabolism	CYTOPLASMIC
NCDO2118_RS06445	alpha-acetolactate decarboxylase 1331046:1331756 forward MW:26353	14	10	132.879	Q	Secondary metabolites biosynthesis, transport and catabolism	Metabolism	CYTOPLASMIC
NCDO2118_RS01345	oxidoreductase 262289:263308 reverse MW:38056	14	10	96.4981	R	General function prediction only	Poorly characterized	CYTOPLASMIC
NCDO2118_RS01520	transcriptional regulator 293030:293386 reverse MW:14151	14	10	102.112	R	General function prediction only	Poorly characterized	CYTOPLASMIC
NCDO2118_RS12325	Crp/Fnr family transcriptional regulator 2507858:2508520 reverse MW:25492	14	10	104.078	T	Signal transduction mechanisms	Cellular processes and sinaling	CYTOPLASMIC
NCDO2118_RS00835	cold-shock protein 164789:164986 reverse MW:7123	14	10	69.4146	K	Transcription	Information storage and processing	CYTOPLASMIC
NCDO2118_RS01920	methionine import ATP-binding protein MetN 368243:369349 forward MW:41090	14	10	110.512	P	Inorganic ion transport and metabolism	Metabolism	CYTOPLASMIC
NCDO2118_RS09175	6-phospho-beta-glucosidase 1898696:1900129 reverse MW:54728	14	10	102.874	G	Carbohydrate transport and metabolism	Metabolism	CYTOPLASMIC
NCDO2118_RS04105	acetyl-CoA carboxylase subunit alpha 821438:822211 forward MW:28278	14	11	110.105	I	Lipid transport and metabolism	Metabolism	CYTOPLASMIC
NCDO2118_RS02820	glyceraldehyde-3-phosphate dehydrogenase 546103:547116 forward MW:36057	14	11	85.933	G	Carbohydrate transport and metabolism	Metabolism	CYTOPLASMIC
NCDO2118_RS02000	alkyl hydroperoxide reductase subunit C 382327:382890 forward MW:20603	14	11	100.122	O	Posttranslational modification, protein turnover, chaperones	Cellular processes and sinaling	CYTOPLASMIC
NCDO2118_RS03085	methionine aminopeptidase 593470:594324 forward MW:31781	14	12	77.3845	J	Translation, ribosomal structure and biogenesis	Information storage and processing	CYTOPLASMIC
NCDO2118_RS05995	GTP-binding protein 1199457:1200044 forward MW:22550	14	12	115.052	R	General function prediction only	Poorly characterized	CYTOPLASMIC
NCDO2118_RS07310	virion core protein 1523893:1525104 forward MW:44046	14	12	74.7582	S	Function unknown	Poorly characterized	CYTOPLASMIC
NCDO2118_RS00965	50S ribosomal protein L28 190106:190300 reverse MW:7173	14	13	54.9209	J	Translation, ribosomal structure and biogenesis	Information storage and processing	CYTOPLASMIC
NCDO2118_RS06945	9-O-acetylesterase 1443980:1445827 reverse MW:71386	15	5	97.6693	R	General function prediction only	Poorly characterized	CYTOPLASMIC
NCDO2118_RS08305	LacI family transcriptional regulator 1737534:1738538 reverse MW:37966	15	6	86.0829	K	Transcription	Information storage and processing	CYTOPLASMIC
NCDO2118_RS09715	ATP synthase subunit b 2012691:2013197 reverse MW:17984	15	8	129.314	C	Energy production and conversion	Metabolism	PSE
NCDO2118_RS02245	tRNA-binding protein 440160:440786 forward MW:22302	15	8	120.72	R	General function prediction only	Poorly characterized	CYTOPLASMIC
NCDO2118_RS05610	Nif3-like dinuclear metal center hexameric protein	15	8	115.502	S	Function unknown	Poorly characterized	CYTOPLASMIC
NCDO2118_RS04080	3-oxoacyl-ACP synthase 816447:817676 forward MW:42488	15	8	117.84	IQ	Lipid transport and metabolism	Metabolism	CYTOPLASMIC
NCDO2118_RS09910	UDP-N-acetylmuramoylalanyl-D-glutamate--2, 6-diaminopimelate ligase	15	9	82.241	M	Cell wall/membrane/envelope biogenesis	Cellular processes and sinaling	CYTOPLASMIC
NCDO2118_RS11045	uridylate kinase 2268220:2268936 reverse MW:25677	15	9	106.681	F	Nucleotide transport and metabolism	Metabolism	CYTOPLASMIC
NCDO2118_RS01055	epimerase 206588:207529 forward MW:35082	15	9	88.6607	MG	Cell wall/membrane/envelope biogenesis	Cellular processes and sinaling	CYTOPLASMIC
NCDO2118_RS03005	Unknown Function 579152:579679 forward MW:20528	15	9	87.6487	S	Function unknown	Poorly characterized	CYTOPLASMIC
NCDO2118_RS09065	RNA methyltransferase 1877651:1878805 reverse MW:43294	15	9	101.094	L	Replication, recombination and repair	Information storage and processing	CYTOPLASMIC
NCDO2118_RS04695	peptidyl-prolyl cis-trans isomerase 950002:950592 forward MW:21560	15	9	117.512	O	Posttranslational modification, protein turnover, chaperones	Cellular processes and sinaling	CYTOPLASMIC
NCDO2118_RS00215	dihydrolipoamide dehydrogenase 41393:42811 reverse MW:49867	15	9	107.769	C	Energy production and conversion	Metabolism	CYTOPLASMIC
NCDO2118_RS11200	Unknown Function 2299585:2300178 reverse MW:22110	15	9	118.38	S	Function unknown	Poorly characterized	CYTOPLASMIC
NCDO2118_RS02260	molecular chaperone GroES 442889:443173 forward MW:10220	15	10	97.5363	O	Posttranslational modification, protein turnover, chaperones	Cellular processes and sinaling	CYTOPLASMIC
NCDO2118_RS06340	histidinol dehydrogenase 1310077:1311372 forward MW:47411	15	10	94.5985	E	Amino acid transport and metabolism	Metabolism	CYTOPLASMIC
NCDO2118_RS00985	dTDP-4-dehydrorhamnose 3,5-epimerase 192555:193148 forward MW:22356	15	10	115.653	M	Cell wall/membrane/envelope biogenesis	Cellular processes and sinaling	CYTOPLASMIC
NCDO2118_RS02675	inositol monophosphatase 525615:526394 forward MW:29532	15	10	92.7943	G	Carbohydrate transport and metabolism	Metabolism	CYTOPLASMIC
NCDO2118_RS10705	transcriptional regulator 2206004:2206543 forward MW:21393	15	10	115.361	K	Transcription	Information storage and processing	CYTOPLASMIC
NCDO2118_RS07250	orotidine 5'-phosphate decarboxylase 1511092:1511805 reverse MW:26097	15	10	96.4997	F	Nucleotide transport and metabolism	Metabolism	CYTOPLASMIC
NCDO2118_RS07515	16S rRNA methyltransferase 1562689:1563288 reverse MW:22147	15	10	103.656	J	Translation, ribosomal structure and biogenesis	Information storage and processing	CYTOPLASMIC
NCDO2118_RS03115	HPr kinase/phosphorylase 597349:598278 forward MW:34542	15	10	96.9019	T	Signal transduction mechanisms	Cellular processes and sinaling	CYTOPLASMIC
NCDO2118_RS03320	long-chain acyl-CoA synthetase 640148:641671 reverse MW:57331	15	11	111.54	I	Lipid transport and metabolism	Metabolism	CYTOPLASMIC
NCDO2118_RS03225	Unknown Function 621811:622479 forward MW:25679	15	11	108.479	S	Function unknown	Poorly characterized	CYTOPLASMIC
NCDO2118_RS06365	1-(5-phosphoribosyl)-5-[(5- phosphoribosylamino)methylideneamino] imidazole-4-carboxamide isomerase	15	11	96.9362	E	Amino acid transport and metabolism	Metabolism	CYTOPLASMIC
NCDO2118_RS03845	naphthoate synthase 766182:767024 reverse MW:30880	15	11	96.5564	H	Coenzyme transport and metabolism	Metabolism	CYTOPLASMIC
NCDO2118_RS11115	glucokinase 2281725:2282696 forward MW:33758	15	12	121.85	KG	Transcription	Information storage and processing	CYTOPLASMIC
NCDO2118_RS01250	dihydroxyacetone kinase subunit DhaK 242304:243296 forward MW:35942	15	12	118.961	G	Carbohydrate transport and metabolism	Metabolism	CYTOPLASMIC
NCDO2118_RS09185	1-deoxy-D-xylulose-5-phosphate synthase 1900636:1902378 reverse MW:63879	15	12	115.993	HI	Coenzyme transport and metabolism	Metabolism	CYTOPLASMIC
NCDO2118_RS10485	ribonuclease Y 2162901:2164496 reverse MW:60318	15	12	83.9431	R	General function prediction only	Poorly characterized	PSE
NCDO2118_RS01905	ABC transporter substrate-binding protein 365423:366283 forward MW:31190	16	6	105.46	P	Inorganic ion transport and metabolism	Metabolism	SECRETED
NCDO2118_RS05555	multidrug ABC transporter ATP-binding protein	16	7	88.904	R	General function prediction only	Poorly characterized	CYTOPLASMIC
NCDO2118_RS09780	bifunctional biotin--[acetyl-CoA-carboxylase] synthetase/biotin operon repressor	16	7	93.6371	H	Coenzyme transport and metabolism	Metabolism	CYTOPLASMIC
NCDO2118_RS04685	LuxR family transcriptional regulator 948393:949022 forward MW:23187	16	9	114.133	TK	Signal transduction mechanisms	Cellular processes and sinaling	CYTOPLASMIC
NCDO2118_RS02005	NADH dehydrogenase 382956:384485 forward MW:55094	16	9	104.021	O	Posttranslational modification, protein turnover, chaperones	Cellular processes and sinaling	CYTOPLASMIC
NCDO2118_RS00975	glucose-1-phosphate thymidylyltransferase 191287:192156 forward MW:32131	16	9	96.3705	M	Cell wall/membrane/envelope biogenesis	Cellular processes and sinaling	CYTOPLASMIC
NCDO2118_RS08105	molecular chaperone GroES 1694591:1695637 reverse MW:37422	16	10	104.802	ER	Amino acid transport and metabolism	Metabolism	CYTOPLASMIC
NCDO2118_RS05900	triosephosphate isomerase 1182860:1183618 forward MW:26905	16	10	136.866	G	Carbohydrate transport and metabolism	Metabolism	CYTOPLASMIC
NCDO2118_RS01080	sugar transferase 211921:212808 forward MW:34012	16	10	90.6742	M	Cell wall/membrane/envelope biogenesis	Cellular processes and sinaling	CYTOPLASMIC
NCDO2118_RS09000	ribokinase 1863411:1864313 reverse MW:32655	16	10	89.1193	G	Carbohydrate transport and metabolism	Metabolism	CYTOPLASMIC
NCDO2118_RS03655	ribosomal RNA small subunit methyltransferase A 717893:718777 forward MW:33345	16	10	105.1	J	Translation, ribosomal structure and biogenesis	Information storage and processing	CYTOPLASMIC
NCDO2118_RS12360	Unknown Function 2517053:2517688 reverse MW:24173	16	10	91.7978	S	Function unknown	Poorly characterized	CYTOPLASMIC
NCDO2118_RS12285	aspartate racemase 2499413:2500135 reverse MW:27679	16	10	134.497	M	Cell wall/membrane/envelope biogenesis	Cellular processes and sinaling	CYTOPLASMIC
NCDO2118_RS06780	pseudouridine synthase 1406706:1407425 reverse MW:26608	16	11	103.128	J	Translation, ribosomal structure and biogenesis	Information storage and processing	CYTOPLASMIC
NCDO2118_RS11995	30S ribosomal protein S6 2454752:2455045 reverse MW:11248	16	11	104.537	J	Translation, ribosomal structure and biogenesis	Information storage and processing	CYTOPLASMIC
NCDO2118_RS04785	Unknown Function 969961:970680 forward MW:26895	16	12	99.6456	S	Function unknown	Poorly characterized	MEMBRANE
NCDO2118_RS00525	pyruvate kinase 100735:101766 reverse MW:39085	16	13	116.738	G	Carbohydrate transport and metabolism	Metabolism	CYTOPLASMIC
NCDO2118_RS02425	phosphoglucosamine mutase 479397:480755 forward MW:48472	16	13	115.691	G	Carbohydrate transport and metabolism	Metabolism	CYTOPLASMIC
NCDO2118_RS09675	glutamine ABC transporter ATP-binding protein 2003886:2004629 forward MW:27071	16	13	110.139	E	Amino acid transport and metabolism	Metabolism	CYTOPLASMIC
NCDO2118_RS00620	Unknown Function 117789:118055 forward MW:10169	16	15	103.836	S	Function unknown	Poorly characterized	CYTOPLASMIC
NCDO2118_RS05150	Unknown Function 1024615:1029537 forward MW:176584	17	5	64.0566	S	Function unknown	Poorly characterized	CYTOPLASMIC
NCDO2118_RS05225	amino acid ABC transporter substrate-binding protein 1042757:1043602 forward MW:30611	17	7	106.975	ET	Amino acid transport and metabolism	Metabolism	PSE
NCDO2118_RS04110	cystathionine beta-lyase 822341:823483 forward MW:40938	17	8	115.444	E	Amino acid transport and metabolism	Metabolism	CYTOPLASMIC
NCDO2118_RS09655	3-dehydroquinate synthase 1998598:1999668 reverse MW:39351	17	9	98.3351	E	Amino acid transport and metabolism	Metabolism	CYTOPLASMIC
NCDO2118_RS05590	dihydroorotase 1117123:1118394 forward MW:45683	17	9	101.255	F	Nucleotide transport and metabolism	Metabolism	CYTOPLASMIC
NCDO2118_RS11065	DNA methyltransferase 2272333:2273271 reverse MW:34799	17	9	138.06	L	Replication, recombination and repair	Information storage and processing	CYTOPLASMIC
NCDO2118_RS01670	cobalt ABC transporter ATP-binding protein 319395:320261 forward MW:31840	17	9	97.8007	P	Inorganic ion transport and metabolism	Metabolism	CYTOPLASMIC
NCDO2118_RS12225	DNA mismatch repair protein MutS 2488696:2491218 reverse MW:94210	17	9	93.4982	L	Replication, recombination and repair	Information storage and processing	CYTOPLASMIC
NCDO2118_RS06125	RNA methyltransferase 1224122:1225492 forward MW:51804	17	9	119.522	J	Translation, ribosomal structure and biogenesis	Information storage and processing	CYTOPLASMIC
NCDO2118_RS10270	ribose-phosphate pyrophosphokinase 2122846:2123811 forward MW:35218	17	9	137.83	FE	Nucleotide transport and metabolism	Metabolism	CYTOPLASMIC
NCDO2118_RS04100	acetyl-CoA carboxylase carboxyltransferase subunit beta 820558:821424 forward MW:31788	17	9	107.333	I	Lipid transport and metabolism	Metabolism	CYTOPLASMIC
NCDO2118_RS00370	heme ABC transporter ATP-binding protein 71480:73033 forward MW:58347	17	10	103.966	R	General function prediction only	Poorly characterized	CYTOPLASMIC
NCDO2118_RS07605	tryptophan synthase subunit beta 1582784:1583992 reverse MW:43772	17	10	93.6066	E	Amino acid transport and metabolism	Metabolism	CYTOPLASMIC
NCDO2118_RS06660	lactate oxidase 1377729:1378829 reverse MW:38994	17	10	100.796	C	Energy production and conversion	Metabolism	CYTOPLASMIC
NCDO2118_RS11680	UDP pyrophosphate synthase 2383349:2384083 reverse MW:27916	17	10	119.663	I	Lipid transport and metabolism	Metabolism	CYTOPLASMIC
NCDO2118_RS05790	oxidoreductase 1155243:1155878 forward MW:23117	17	10	122.984	MG	Cell wall/membrane/envelope biogenesis	Cellular processes and sinaling	CYTOPLASMIC
NCDO2118_RS00430	acyl-phosphate glycerol 3-phosphate acyltransferase 84133:84747 forward MW:23367	17	11	112.926	I	Lipid transport and metabolism	Metabolism	MEMBRANE
NCDO2118_RS09455	phosphate import ATP-binding protein PstB 1 1955968:1956729 reverse MW:28165	17	11	105.482	P	Inorganic ion transport and metabolism	Metabolism	CYTOPLASMIC
NCDO2118_RS02025	UDP-N-acetylmuramoyl-tripeptide--D-alanyl-D- alanine ligase 388792:390114 forward MW:48837	17	11	136.1	M	Cell wall/membrane/envelope biogenesis	Cellular processes and sinaling	CYTOPLASMIC
NCDO2118_RS05350	ATPase P 1069296:1070183 forward MW:33561	17	11	101.757	R	General function prediction only	Poorly characterized	CYTOPLASMIC
NCDO2118_RS06845	branched-chain amino acid aminotransferase 1420519:1421541 reverse MW:36870	17	11	137.036	EH	Amino acid transport and metabolism	Metabolism	CYTOPLASMIC
NCDO2118_RS01725	adenosine deaminase 330148:331182 forward MW:39059	17	12	108.01	F	Nucleotide transport and metabolism	Metabolism	CYTOPLASMIC
NCDO2118_RS08800	aspartate carbamoyltransferase catalytic subunit 1818678:1819610 reverse MW:34639	17	13	121.259	F	Nucleotide transport and metabolism	Metabolism	CYTOPLASMIC
NCDO2118_RS08830	gamma-glutamyl phosphate reductase 1824042:1825283 reverse MW:45250	17	13	131.123	E	Amino acid transport and metabolism	Metabolism	CYTOPLASMIC
NCDO2118_RS01290	SAM-dependent methyltransferase 249289:250458 forward MW:43532	18	7	100.473	R	General function prediction only	Poorly characterized	CYTOPLASMIC
NCDO2118_RS04535	penicillin-binding protein 2X 914884:917175 forward MW:83460	18	8	94.8929	M	Cell wall/membrane/envelope biogenesis	Cellular processes and sinaling	PSE
NCDO2118_RS03430	LacI family transcriptional regulator 671803:672774 reverse MW:36215	18	9	113.176	K	Transcription	Information storage and processing	CYTOPLASMIC
NCDO2118_RS06685	magnesium-transporting ATPase 1384512:1387244 reverse MW:100364	18	9	94.32	P	Inorganic ion transport and metabolism	Metabolism	MEMBRANE
NCDO2118_RS09945	pyrophosphatase 2064127:2065071 reverse MW:34111	18	9	151.03	C	Energy production and conversion	Metabolism	CYTOPLASMIC
NCDO2118_RS08420	UDP-N-acetylglucosamine--N-acetylmuramyl- (pentapeptide) pyrophosphoryl-undecaprenol N-acetylglucosamine transferase	18	9	122.298	M	Cell wall/membrane/envelope biogenesis	Cellular processes and sinaling	CYTOPLASMIC
NCDO2118_RS02825	peptide deformylase 547259:547894 reverse MW:23769	18	10	133.647	J	Translation, ribosomal structure and biogenesis	Information storage and processing	CYTOPLASMIC
NCDO2118_RS07260	dihydroorotate dehydrogenase 1513034:1513822 reverse MW:28818	18	10	111.008	HC	Coenzyme transport and metabolism	Metabolism	CYTOPLASMIC
NCDO2118_RS03785	Unknown Function 751603:752712 forward MW:42992	18	10	115.185	E	Amino acid transport and metabolism	Metabolism	CYTOPLASMIC
NCDO2118_RS09460	phosphate import ATP-binding protein PstB 2 1956895:1957704 reverse MW:30245	18	11	114.868	P	Inorganic ion transport and metabolism	Metabolism	CYTOPLASMIC
NCDO2118_RS01745	peptidase M22 334482:335207 forward MW:26487	18	11	111.155	O	Posttranslational modification, protein turnover, chaperones	Cellular processes and sinaling	CYTOPLASMIC
NCDO2118_RS01070	oligosaccharide glycerophosphotransferase 210092:210928 forward MW:33321	18	12	113.187	M	Cell wall/membrane/envelope biogenesis	Cellular processes and sinaling	CYTOPLASMIC
NCDO2118_RS11520	30S ribosomal protein S10 2351798:2352106 reverse MW:11741	18	12	133.105	J	Translation, ribosomal structure and biogenesis	Information storage and processing	CYTOPLASMIC
NCDO2118_RS04045	ribosome-binding factor A 810674:811033 forward MW:13416	18	13	104.066	J	Translation, ribosomal structure and biogenesis	Information storage and processing	CYTOPLASMIC
NCDO2118_RS11985	30S ribosomal protein S18 2453803:2454048 reverse MW:9371	18	13	111.298	J	Translation, ribosomal structure and biogenesis	Information storage and processing	CYTOPLASMIC
NCDO2118_RS04900	Unknown Function 997357:998016 partial 3' reverse MW:23013	18	13	141.982	S	Function unknown	Poorly characterized	PSE
NCDO2118_RS00235	lipoate-protein ligase A 46792:47793 reverse MW:37855	18	13	123.583	H	Coenzyme transport and metabolism	Metabolism	CYTOPLASMIC
NCDO2118_RS02360	PTS sugar transporter 463182:463508 forward MW:11310	18	14	97.05	G	Carbohydrate transport and metabolism	Metabolism	SECRETED
NCDO2118_RS00275	hydrolase 54690:55502 reverse MW:30441	18	15	144.618	R	General function prediction only	Poorly characterized	CYTOPLASMIC
NCDO2118_RS01995	2,3-bisphosphoglycerate-dependent phosphoglycerate mutase	18	16	172.649	G	Carbohydrate transport and metabolism	Metabolism	CYTOPLASMIC
NCDO2118_RS06665	phospho-2-dehydro-3-deoxyheptonate aldolase 1379115:1380137 reverse MW:38819	19	6	122.37	E	Amino acid transport and metabolism	Metabolism	CYTOPLASMIC
NCDO2118_RS11710	1,2-diacylglycerol 3-glucosyltransferase 2388931:2390271 forward MW:50938	19	6	102.382	M	Cell wall/membrane/envelope biogenesis	Cellular processes and sinaling	CYTOPLASMIC
NCDO2118_RS03905	phospholipase 780616:781482 reverse MW:31929	19	11	103.947	R	General function prediction only	Poorly characterized	CYTOPLASMIC
NCDO2118_RS11540	transcription termination/antitermination protein NusG	19	11	132.802	K	Transcription	Information storage and processing	CYTOPLASMIC
NCDO2118_RS05460	DNA topoisomerase IV subunit A 1091439:1093913 forward MW:92778	19	11	104.388	L	Replication, recombination and repair	Information storage and processing	CYTOPLASMIC
NCDO2118_RS00310	universal stress protein 62306:62773 forward MW:16635	19	11	133.061	T	Signal transduction mechanisms	Cellular processes and sinaling	CYTOPLASMIC
NCDO2118_RS11430	50S ribosomal protein L18 2342695:2343042 reverse MW:12358	19	11	141.375	J	Translation, ribosomal structure and biogenesis	Information storage and processing	CYTOPLASMIC
NCDO2118_RS07510	pyrimidine-nucleoside phosphorylase 1561366:1562658 reverse MW:46666	19	12	116.117	F	Nucleotide transport and metabolism	Metabolism	CYTOPLASMIC
NCDO2118_RS10500	cyclopropane-fatty-acyl-phospholipid synthase 2167070:2168263 reverse MW:45373	19	12	143.016	M	Cell wall/membrane/envelope biogenesis	Cellular processes and sinaling	CYTOPLASMIC
NCDO2118_RS09535	haloacid dehalogenase 1974802:1975638 forward MW:32169	19	13	138.818	R	General function prediction only	Poorly characterized	CYTOPLASMIC
NCDO2118_RS11490	50S ribosomal protein L22 2348564:2348911 reverse MW:12469	19	13	153.279	J	Translation, ribosomal structure and biogenesis	Information storage and processing	CYTOPLASMIC
NCDO2118_RS11390	30S ribosomal protein S13 2338010:2338375 reverse MW:13491	19	13	139.478	J	Translation, ribosomal structure and biogenesis	Information storage and processing	CYTOPLASMIC
NCDO2118_RS05990	ATP-dependent Clp protease ATP-binding subunit ClpX	19	13	146.921	O	Posttranslational modification, protein turnover, chaperones	Cellular processes and sinaling	CYTOPLASMIC
NCDO2118_RS01130	Unknown Function 222103:222693 forward MW:22454	20	8	85.2724	H	Coenzyme transport and metabolism	Metabolism	CYTOPLASMIC
NCDO2118_RS04070	ACP S-malonyltransferase 814663:815589 forward MW:33571	20	9	171.081	I	Lipid transport and metabolism	Metabolism	CYTOPLASMIC
NCDO2118_RS12470	50S ribosomal protein L13 2536066:2536512 reverse MW:16195	20	9	86.7659	J	Translation, ribosomal structure and biogenesis	Information storage and processing	CYTOPLASMIC
NCDO2118_RS01380	N-acetylmuramidase 267376:268695 reverse MW:46606	20	10	113.12	NU	Cell motility	Cellular processes and sinaling	PSE
NCDO2118_RS11195	UDP-N-acetylmuramate--alanine ligase 2298051:2299382 reverse MW:50078	20	11	124.145	M	Cell wall/membrane/envelope biogenesis	Cellular processes and sinaling	CYTOPLASMIC
NCDO2118_RS10935	protease 2251369:2252661 reverse MW:47882	20	11	132.587	O	Posttranslational modification, protein turnover, chaperones	Cellular processes and sinaling	CYTOPLASMIC
NCDO2118_RS04390	alanine racemase 887583:888686 forward MW:40689	20	12	104.779	M	Cell wall/membrane/envelope biogenesis	Cellular processes and sinaling	CYTOPLASMIC
NCDO2118_RS10430	transcriptional regulator 2155048:2155554 reverse MW:18451	20	12	150.779	S	Function unknown	Poorly characterized	CYTOPLASMIC
NCDO2118_RS11510	50S ribosomal protein L4 2350504:2351130 reverse MW:22305	20	13	126.793	J	Translation, ribosomal structure and biogenesis	Information storage and processing	CYTOPLASMIC
NCDO2118_RS05510	glycosyltransferase 1102627:1103583 forward MW:35990	20	13	128.311	M	Cell wall/membrane/envelope biogenesis	Cellular processes and sinaling	MEMBRANE
NCDO2118_RS05280	Unknown Function 1053208:1054545 forward MW:46772	20	13	134.196	S	Function unknown	Poorly characterized	CYTOPLASMIC
NCDO2118_RS12275	molecular chaperone DnaJ 2497427:2498566 reverse MW:40671	20	14	133.84	O	Posttranslational modification, protein turnover, chaperones	Cellular processes and sinaling	CYTOPLASMIC
NCDO2118_RS11005	50S ribosomal protein L11 2262780:2263205 reverse MW:14673	20	15	142.524	J	Translation, ribosomal structure and biogenesis	Information storage and processing	CYTOPLASMIC
NCDO2118_RS01095	family 25 glycosyl hydrolase 214606:215988 reverse MW:50637	20	15	145.138	G	General function prediction only	Poorly characterized	SECRETED
NCDO2118_RS00105	hypoxanthine-guanine phosphoribosyltransferase	20	15	143.191	F	Nucleotide transport and metabolism	Metabolism	CYTOPLASMIC
NCDO2118_RS02650	penicillin-binding protein 1A 521422:523416 reverse MW:71923	20	15	130.33	M	Cell wall/membrane/envelope biogenesis	Cellular processes and sinaling	PSE
NCDO2118_RS04075	3-ketoacyl-ACP reductase 815675:816406 forward MW:25640	20	16	135.506	IQR	Lipid transport and metabolism	Metabolism	CYTOPLASMIC
NCDO2118_RS10495	S-adenosylmethionine synthetase 2165545:2166744 reverse MW:43031	20	16	149.657	H	Coenzyme transport and metabolism	Metabolism	CYTOPLASMIC
NCDO2118_RS11560	penicillin-binding protein 2A 2358875:2361106 reverse MW:82003	21	9	134.734	M	Cell wall/membrane/envelope biogenesis	Cellular processes and sinaling	PSE
NCDO2118_RS04160	exodeoxyribonuclease 829836:830693 reverse MW:32322	21	9	138.125	L	Replication, recombination and repair	Information storage and processing	CYTOPLASMIC
NCDO2118_RS01440	transcriptional regulator 277665:278216 forward MW:20302	21	13	147.057	S	Function unknown	Poorly characterized	CYTOPLASMIC
NCDO2118_RS04470	exodeoxyribonuclease VII large subunit 903626:904879 forward MW:47108	21	13	118.706	L	Replication, recombination and repair	Information storage and processing	CYTOPLASMIC
NCDO2118_RS05755	NAD synthetase 1145741:1146565 forward MW:30209	21	14	141.299	H	Coenzyme transport and metabolism	Metabolism	CYTOPLASMIC
NCDO2118_RS12495	pur operon repressor 2540343:2541158 reverse MW:30361	21	16	152.461	F	Nucleotide transport and metabolism	Metabolism	CYTOPLASMIC
NCDO2118_RS11420	50S ribosomal protein L30 2341980:2342159 reverse MW:6193	21	16	85.8087	J	Translation, ribosomal structure and biogenesis	Information storage and processing	CYTOPLASMIC
NCDO2118_RS09115	dehydrogenase 1887387:1888367 forward MW:36229	21	16	126.253	R	General function prediction only	Poorly characterized	CYTOPLASMIC
NCDO2118_RS03295	sigma-54 modulation protein 635475:636032 forward MW:21225	21	16	127.053	J	Translation, ribosomal structure and biogenesis	Information storage and processing	CYTOPLASMIC
NCDO2118_RS10150	universal stress protein UspA 2097974:2098411 forward MW:15700	21	17	166.218	T	Signal transduction mechanisms	Cellular processes and sinaling	CYTOPLASMIC
NCDO2118_RS11015	ABC transporter ATP-binding protein 2264105:2264983 reverse MW:33259	22	5	154.76	V	Defense mechanisms	Cellular processes and sinaling	CYTOPLASMIC
NCDO2118_RS07485	GntR family transcriptional regulator 1557912:1558619 reverse MW:26731	22	10	133.885	K	Transcription	Information storage and processing	CYTOPLASMIC
NCDO2118_RS05400	peptide chain release factor 2 1078650:1079747 forward MW:41570	22	11	156.5	J	Translation, ribosomal structure and biogenesis	Information storage and processing	CYTOPLASMIC
NCDO2118_RS11375	50S ribosomal protein L17 2336221:2336601 reverse MW:14255	22	12	123.008	J	Translation, ribosomal structure and biogenesis	Information storage and processing	CYTOPLASMIC
NCDO2118_RS07500	deoxyribose-phosphate aldolase 1560501:1561163 reverse MW:23425	22	12	152.971	F	Nucleotide transport and metabolism	Metabolism	CYTOPLASMIC
NCDO2118_RS10425	16S rRNA methyltransferase 2153576:2154850 reverse MW:47877	22	12	138.484	J	Translation, ribosomal structure and biogenesis	Information storage and processing	CYTOPLASMIC
NCDO2118_RS09700	ATP synthase subunit gamma 2009588:2010457 reverse MW:31997	22	13	141.441	C	Energy production and conversion	Metabolism	CYTOPLASMIC
NCDO2118_RS03765	ABC transporter ATP-binding protein 747226:749220 reverse MW:71737	22	13	119.748	V	Defense mechanisms	Cellular processes and sinaling	PSE
NCDO2118_RS08410	GTPase Obg 1759347:1760660 reverse MW:48234	22	14	172.13	R	General function prediction only	Poorly characterized	CYTOPLASMIC
NCDO2118_RS05405	cell division protein FtsE 1080074:1080766 forward MW:25800	22	14	147.798	D	Cell cycle control, cell division, chromosome partitioning	Cellular processes and sinaling	CYTOPLASMIC
NCDO2118_RS05585	orotate phosphoribosyltransferase 1116339:1116968 forward MW:22603	22	15	168.253	F	Nucleotide transport and metabolism	Metabolism	CYTOPLASMIC
NCDO2118_RS00230	pyruvate dehydrogenase E1 subunit alpha 45579:46703 reverse MW:41325	22	15	159.47	C	Energy production and conversion	Metabolism	CYTOPLASMIC
NCDO2118_RS10950	peptidase U32 2253787:2254710 reverse MW:34678	22	15	133.595	O	Posttranslational modification, protein turnover, chaperones	Cellular processes and sinaling	CYTOPLASMIC
NCDO2118_RS05775	UDP-N-acetylmuramyl peptide synthase 1150943:1152292 reverse MW:50028	22	15	120.355	M	Cell wall/membrane/envelope biogenesis	Cellular processes and sinaling	CYTOPLASMIC
NCDO2118_RS01000	dTDP-4-dehydrorhamnose reductase 194582:195481 forward MW:33125	23	11	145.317	M	Cell wall/membrane/envelope biogenesis	Cellular processes and sinaling	CYTOPLASMIC
NCDO2118_RS02635	cysteine synthase 518515:519447 reverse MW:32393	23	11	172.132	E	Amino acid transport and metabolism	Metabolism	CYTOPLASMIC
NCDO2118_RS03280	transcription elongation factor GreA 631795:632268 forward MW:17387	23	12	158.538	K	Transcription	Information storage and processing	CYTOPLASMIC
NCDO2118_RS06815	glutamate racemase 1411072:1411887 reverse MW:30250	23	13	149.354	M	Cell wall/membrane/envelope biogenesis	Cellular processes and sinaling	CYTOPLASMIC
NCDO2118_RS12295	asparagine synthase 2501405:2503282 reverse MW:72333	23	14	144.463	E	Amino acid transport and metabolism	Metabolism	CYTOPLASMIC
NCDO2118_RS11670	metalloprotease RseP 2381241:2382527 reverse MW:46384	23	15	145.285	M	Cell wall/membrane/envelope biogenesis	Cellular processes and sinaling	PSE
NCDO2118_RS04095	acetyl-CoA carboxylase biotin carboxylase 819105:820472 forward MW:49513	23	15	151.107	I	Lipid transport and metabolism	Metabolism	CYTOPLASMIC
NCDO2118_RS10240	cysteinyl-tRNA synthetase 2115082:2116428 reverse MW:51021	23	15	140.292	J	Translation, ribosomal structure and biogenesis	Information storage and processing	CYTOPLASMIC
NCDO2118_RS10690	phenylalanine--tRNA ligase subunit beta 2201310:2203703 reverse MW:87215	23	15	168.392	J	Translation, ribosomal structure and biogenesis	Information storage and processing	CYTOPLASMIC
NCDO2118_RS04890	purine nucleoside phosphorylase 995023:995727 forward MW:25393	23	16	156.365	F	Nucleotide transport and metabolism	Metabolism	CYTOPLASMIC
NCDO2118_RS11255	ABC transporter substrate-binding protein 2314578:2315420 forward MW:31023	23	18	143.939	ET	Amino acid transport and metabolism	Metabolism	PSE
NCDO2118_RS04370	excinuclease ABC subunit C 882260:884266 forward MW:76368	24	6	134.581	L	Replication, recombination and repair	Information storage and processing	CYTOPLASMIC
NCDO2118_RS03275	aminodeoxychorismate lyase 630101:631735 forward MW:60484	24	12	155.523	R	General function prediction only	Poorly characterized	PSE
NCDO2118_RS01935	heme ABC transporter ATP-binding protein 370749:372446 forward MW:62857	24	12	144.939	P	Inorganic ion transport and metabolism	Metabolism	CYTOPLASMIC
NCDO2118_RS04260	cell division protein FtsY 853863:855242 forward MW:51048	24	12	135.088	U	Intracellular trafficking, secretion, and vesicular transport	Cellular processes and sinaling	CYTOPLASMIC
NCDO2118_RS09450	PhoU family transcriptional regulator 1955152:1955805 reverse MW:24477	24	12	180.179	P	Inorganic ion transport and metabolism	Metabolism	CYTOPLASMIC
NCDO2118_RS05340	PTS fructose IIA component / PTS fructose IIB component / PTS,fructose IIC component	24	12	149.422	G	Carbohydrate transport and metabolism	Metabolism	PSE
NCDO2118_RS02315	mevalonate kinase 452219:453151 reverse MW:34334	24	14	167.959	I	Lipid transport and metabolism	Metabolism	CYTOPLASMIC
NCDO2118_RS04500	DNA repair protein RecN 908638:910332 forward MW:63808	24	15	155.782	L	Replication, recombination and repair	Information storage and processing	CYTOPLASMIC
NCDO2118_RS05955	GMP reductase 1192800:1193789 forward MW:35811	24	15	149.179	F	Nucleotide transport and metabolism	Metabolism	CYTOPLASMIC
NCDO2118_RS07805	ABC transporter substrate-binding protein 1624899:1626350 reverse MW:52925	24	16	163.526	G	Carbohydrate transport and metabolism	Metabolism	PSE
NCDO2118_RS10125	asparaginyl-tRNA synthase 2091915:2093258 reverse MW:50884	24	16	169.235	J	Translation, ribosomal structure and biogenesis	Information storage and processing	CYTOPLASMIC
NCDO2118_RS11515	50S ribosomal protein L3 2351156:2351779 reverse MW:21932	24	16	118.358	J	Translation, ribosomal structure and biogenesis	Information storage and processing	CYTOPLASMIC
NCDO2118_RS09050	catabolite control protein A 1872933:1873931 reverse MW:36603	24	17	206.567	K	Transcription	Information storage and processing	CYTOPLASMIC
NCDO2118_RS11465	50S ribosomal protein L14 2346600:2346968 reverse MW:12922	24	17	135.735	J	Translation, ribosomal structure and biogenesis	Information storage and processing	CYTOPLASMIC
NCDO2118_RS03435	sucrose-6-phosphate hydrolase 672756:674174 reverse MW:54461	24	17	168.115	G	Carbohydrate transport and metabolism	Metabolism	CYTOPLASMIC
NCDO2118_RS02230	glutamyl aminopeptidase 438261:439328 reverse MW:38367	24	20	170.708	G	Carbohydrate transport and metabolism	Metabolism	CYTOPLASMIC
NCDO2118_RS12505	30S ribosomal protein S7 2543903:2544370 reverse MW:17683	24	20	148.385	J	Translation, ribosomal structure and biogenesis	Information storage and processing	CYTOPLASMIC
NCDO2118_RS01900	ABC transporter substrate-binding protein 364419:365279 forward MW:31283	25	11	181.525	P	Inorganic ion transport and metabolism	Metabolism	SECRETED
NCDO2118_RS04120	Unknown Function 824847:825086 forward MW:8549	25	13	116.716	S	Function unknown	Poorly characterized	CYTOPLASMIC
NCDO2118_RS03980	GTPase Der 793145:794455 forward MW:48896	25	14	163.543	R	General function prediction only	Poorly characterized	CYTOPLASMIC
NCDO2118_RS03875	Unknown Function 773390:774313 forward MW:34604	25	15	186.409	R	General function prediction only	Poorly characterized	CYTOPLASMIC
NCDO2118_RS01005	glycosyl transferase 195615:196823 forward MW:45841	25	15	147.066	M	Cell wall/membrane/envelope biogenesis	Cellular processes and sinaling	CYTOPLASMIC
NCDO2118_RS10405	pyrroline-5-carboxylate reductase 2149524:2150312 forward MW:27942	25	15	155.096	E	Amino acid transport and metabolism	Metabolism	CYTOPLASMIC
NCDO2118_RS00225	2-oxoisovalerate dehydrogenase subunit beta 44596:45576 reverse MW:35210	25	15	196.44	C	Energy production and conversion	Metabolism	CYTOPLASMIC
NCDO2118_RS09820	Fe-S cluster assembly protein SufB 2030977:2032389 reverse MW:52553	25	16	136.814	O	Posttranslational modification, protein turnover, chaperones	Cellular processes and sinaling	CYTOPLASMIC
NCDO2118_RS03675	nitrogen utilization protein B 721166:722137 forward MW:37231	25	18	161.143	K	Transcription	Information storage and processing	CYTOPLASMIC
NCDO2118_RS10615	uracil phosphoribosyltransferase 2186720:2187355 reverse MW:23231	25	19	140.842	F	Nucleotide transport and metabolism	Metabolism	CYTOPLASMIC
NCDO2118_RS05545	transcriptional regulator 1109818:1110468 reverse MW:24293	25	20	181.124	R	General function prediction only	Poorly characterized	CYTOPLASMIC
NCDO2118_RS09575	exodeoxyribonuclease V subunit alpha 1981903:1984407 reverse MW:92932	26	12	131.088	L	Replication, recombination and repair	Information storage and processing	CYTOPLASMIC
NCDO2118_RS01035	alpha-L-Rha alpha-1,3-L-rhamnosyltransferase 202105:203874 forward MW:69993	26	14	165.281	M	Cell wall/membrane/envelope biogenesis	Cellular processes and sinaling	CYTOPLASMIC
NCDO2118_RS11030	S1 RNA-binding protein 2265996:2266853 reverse MW:32285	26	14	166.895	S	Function unknown	Poorly characterized	CYTOPLASMIC
NCDO2118_RS07220	UTP--glucose-1-phosphate uridylyltransferase 1507001:1507942 forward MW:34834	26	17	200.589	M	Cell wall/membrane/envelope biogenesis	Cellular processes and sinaling	CYTOPLASMIC
NCDO2118_RS11475	50S ribosomal protein L29 2347272:2347481 reverse MW:7859	26	22	108.532	J	Translation, ribosomal structure and biogenesis	Information storage and processing	CYTOPLASMIC
NCDO2118_RS02225	transglycosylase 435798:438203 forward MW:86979	27	13	180.439	M	Cell wall/membrane/envelope biogenesis	Cellular processes and sinaling	PSE
NCDO2118_RS12290	carboxylate--amine ligase 2500167:2501393 reverse MW:47495	27	14	185.632	R	General function prediction only	Poorly characterized	CYTOPLASMIC
NCDO2118_RS06465	tRNA (uracil-5-)-methyltransferase 1335637:1336980 forward MW:50007	27	14	201.289	J	Translation, ribosomal structure and biogenesis	Information storage and processing	CYTOPLASMIC
NCDO2118_RS05215	formate--tetrahydrofolate ligase 1040250:1041917 forward MW:59541	27	15	189.17	F	Nucleotide transport and metabolism	Metabolism	CYTOPLASMIC
NCDO2118_RS07930	phosphoribosylamine--glycine ligase 1659630:1660868 reverse MW:44288	27	16	171.058	F	Nucleotide transport and metabolism	Metabolism	CYTOPLASMIC
NCDO2118_RS11125	ferritin 2283168:2283614 reverse MW:16653	27	16	212.704	P	Inorganic ion transport and metabolism	Metabolism	CYTOPLASMIC
NCDO2118_RS11535	threonine synthase 2354113:2355603 reverse MW:55213	27	17	174.455	E	Amino acid transport and metabolism	Metabolism	CYTOPLASMIC
NCDO2118_RS05620	sugar phosphate phosphatase 1122128:1122943 reverse MW:30064	27	17	186.455	G	Carbohydrate transport and metabolism	Metabolism	CYTOPLASMIC
NCDO2118_RS02880	hydrolase 557822:558580 reverse MW:28278	27	17	173.994	R	General function prediction only	Poorly characterized	CYTOPLASMIC
NCDO2118_RS08810	pyrimidine operon regulatory protein 1821180:1821701 reverse MW:19831	27	18	176.041	F	Nucleotide transport and metabolism	Metabolism	CYTOPLASMIC
NCDO2118_RS07165	heme ABC transporter ATP-binding protein 1494694:1496214 forward MW:55639	27	19	170.584	R	General function prediction only	Poorly characterized	CYTOPLASMIC
NCDO2118_RS11150	aminotransferase 2287824:2288954 reverse MW:42696	27	20	190.303	E	Amino acid transport and metabolism	Metabolism	CYTOPLASMIC
NCDO2118_RS05835	ATP-dependent DNA helicase PcrA 1168139:1170415 forward MW:85864	28	14	159.518	L	Replication, recombination and repair	Information storage and processing	CYTOPLASMIC
NCDO2118_RS10660	RmuC family endonuclease 2196388:2197692 reverse MW:49415	28	15	179.943	S	Function unknown	Poorly characterized	MEMBRANE
NCDO2118_RS08445	PhoB family transcriptional regulator 1768336:1769028 reverse MW:26670	28	15	225.798	TK	Signal transduction mechanisms	Cellular processes and sinaling	CYTOPLASMIC
NCDO2118_RS08315	Unknown Function 1739183:1740412 reverse MW:47554	28	16	164.189	R	General function prediction only	Poorly characterized	CYTOPLASMIC
NCDO2118_RS05335	phosphofructokinase 1064863:1065780 forward MW:33759	28	16	214.838	G	Carbohydrate transport and metabolism	Metabolism	CYTOPLASMIC
NCDO2118_RS02345	DEAD/DEAH box helicase 460171:461511 forward MW:50489	28	17	173.851	LKJ	Replication, recombination and repair	Information storage and processing	CYTOPLASMIC
NCDO2118_RS05235	amino acid ABC transporter ATP-binding protein 1044769:1045521 forward MW:28038	28	17	141.973	E	Amino acid transport and metabolism	Metabolism	CYTOPLASMIC
NCDO2118_RS02190	thiamine biosynthesis protein ThiI 427494:428714 forward MW:45270	28	17	161.178	H	Coenzyme transport and metabolism	Metabolism	CYTOPLASMIC
NCDO2118_RS03440	PTS sucrose transporter subunit IIABC 674352:676304 forward MW:69602	28	18	168.464	G	Carbohydrate transport and metabolism	Metabolism	PSE
NCDO2118_RS07180	lactate dehydrogenase 1498372:1499349 reverse MW:35050	28	18	150.527	C	Energy production and conversion	Metabolism	CYTOPLASMIC
NCDO2118_RS09355	cytidylate kinase 1939448:1940110 reverse MW:24548	28	18	209.26	F	Nucleotide transport and metabolism	Metabolism	CYTOPLASMIC
NCDO2118_RS10400	bifunctional protein GlmU 2147920:2149296 reverse MW:49180	28	19	200.481	M	Cell wall/membrane/envelope biogenesis	Cellular processes and sinaling	CYTOPLASMIC
NCDO2118_RS11865	glucose-6-phosphate isomerase 2426559:2427905 reverse MW:49595	28	23	255.444	G	Carbohydrate transport and metabolism	Metabolism	CYTOPLASMIC
NCDO2118_RS00450	phospho-2-dehydro-3-deoxyheptonate aldolase 88857:89894 forward MW:39250	29	14	219.413	E	Amino acid transport and metabolism	Metabolism	CYTOPLASMIC
NCDO2118_RS06150	acetolactate synthase 1230435:1232099 forward MW:60765	29	15	173.19	EH	Amino acid transport and metabolism	Metabolism	CYTOPLASMIC
NCDO2118_RS09055	dipeptidase 1874146:1875234 forward MW:39951	29	15	252.065	E	Amino acid transport and metabolism	Metabolism	CYTOPLASMIC
NCDO2118_RS07560	glycine/betaine ABC transporter permease 1569669:1571390 reverse MW:61938	29	15	182.508	E	Amino acid transport and metabolism	Metabolism	PSE
NCDO2118_RS00020	ATP-dependent helicase 6639:10250 forward MW:138860	29	15	156.873	L	Replication, recombination and repair	Information storage and processing	CYTOPLASMIC
NCDO2118_RS03290	ATP-dependent Clp protease ATP-binding protein 632890:635340 forward MW:90427	29	16	184.312	O	Posttranslational modification, protein turnover, chaperones	Cellular processes and sinaling	CYTOPLASMIC
NCDO2118_RS12235	oxidoreductase 2491975:2492856 reverse MW:31263	29	17	202.594	I	Lipid transport and metabolism	Metabolism	CYTOPLASMIC
NCDO2118_RS00010	DNA polymerase III subunit beta 2099:3241 forward MW:42264	29	17	197.494	L	Replication, recombination and repair	Information storage and processing	CYTOPLASMIC
NCDO2118_RS02405	sugar ABC transporter ATP-binding protein 472203:473339 forward MW:42152	29	18	233.412	G	Carbohydrate transport and metabolism	Metabolism	CYTOPLASMIC
NCDO2118_RS07345	calcium-transporting ATPase 1533019:1535655 reverse MW:96006	29	18	180.894	P	Inorganic ion transport and metabolism	Metabolism	MEMBRANE
NCDO2118_RS02515	CTP synthase 495644:497251 forward MW:59552	29	18	171.29	F	Nucleotide transport and metabolism	Metabolism	CYTOPLASMIC
NCDO2118_RS10285	cysteine desulfurase 2125756:2126100 forward MW:13120	29	18	175.228	R	General function prediction only	Poorly characterized	CYTOPLASMIC
NCDO2118_RS02060	peptide chain release factor 3 398137:399708 forward MW:59521	29	20	198.709	J	Translation, ribosomal structure and biogenesis	Information storage and processing	CYTOPLASMIC
NCDO2118_RS11440	30S ribosomal protein S8 2344011:2344409 reverse MW:14671	29	20	153.183	J	Translation, ribosomal structure and biogenesis	Information storage and processing	CYTOPLASMIC
NCDO2118_RS07215	glycerol-3-phosphate dehydrogenase 1505933:1506958 forward MW:37188	29	22	207.891	C	Energy production and conversion	Metabolism	CYTOPLASMIC
NCDO2118_RS11155	carbamate kinase 2289218:2290162 reverse MW:34059	29	23	211.173	E	Amino acid transport and metabolism	Metabolism	CYTOPLASMIC
NCDO2118_RS01360	oxidoreductase 264866:265711 forward MW:31059	30	15	182.114	R	General function prediction only	Poorly characterized	CYTOPLASMIC
NCDO2118_RS04905	endonuclease 998110:999165 reverse MW:40322	30	15	170.899	S	Function unknown	Poorly characterized	CYTOPLASMIC
NCDO2118_RS00250	tryptophan--tRNA ligase 49685:50710 reverse MW:38035	30	16	214.114	J	Translation, ribosomal structure and biogenesis	Information storage and processing	CYTOPLASMIC
NCDO2118_RS09635	chorismate synthase 1995054:1996220 reverse MW:42677	30	17	196.375	E	Amino acid transport and metabolism	Metabolism	CYTOPLASMIC
NCDO2118_RS09500	foldase 1966090:1967016 reverse MW:33814	30	18	176.236	O	Posttranslational modification, protein turnover, chaperones	Cellular processes and sinaling	PSE
NCDO2118_RS02435	PTS sugar transporter subunit IIA 481658:482143 forward MW:17249	30	18	194.34	G	Carbohydrate transport and metabolism	Metabolism	CYTOPLASMIC
NCDO2118_RS02085	recombinase RecA 405745:406908 forward MW:41457	30	19	176.597	L	Replication, recombination and repair	Information storage and processing	CYTOPLASMIC
NCDO2118_RS00805	glutamyl-tRNA(Gln) amidotransferase subunit C	30	20	143.315	J	Translation, ribosomal structure and biogenesis	Information storage and processing	CYTOPLASMIC
NCDO2118_RS11485	30S ribosomal protein S3 2347898:2348551 reverse MW:23985	30	20	215.096	J	Translation, ribosomal structure and biogenesis	Information storage and processing	CYTOPLASMIC
NCDO2118_RS00605	RNA-binding protein 115170:116084 forward MW:33801	30	22	271.364	R	General function prediction only	Poorly characterized	CYTOPLASMIC
NCDO2118_RS11220	pyruvate oxidase 2305465:2307168 reverse MW:62110	30	22	194.692	EH	Amino acid transport and metabolism	Metabolism	CYTOPLASMIC
NCDO2118_RS05310	protein GrpE 1058341:1058880 forward MW:20581	30	25	179.942	O	Posttranslational modification, protein turnover, chaperones	Cellular processes and sinaling	CYTOPLASMIC
NCDO2118_RS00795	aminotransferase AlaT 154837:156051 forward MW:45529	30	25	195.552	E	Amino acid transport and metabolism	Metabolism	CYTOPLASMIC
NCDO2118_RS02445	trehalose 6-phosphate phosphorylase	31	13	182.608	G	Carbohydrate transport and metabolism	Metabolism	CYTOPLASMIC
NCDO2118_RS05720	glycine--tRNA ligase subunit beta	31	15	214.238	J	Translation, ribosomal structure and biogenesis	Information storage and processing	CYTOPLASMIC
NCDO2118_RS02560	fatty acid-binding protein DegV	31	16	243.997	S	Function unknown	Poorly characterized	CYTOPLASMIC
NCDO2118_RS02680	UDP-N-acetylglucosamine 1-carboxyvinyltransferase	31	19	220.157	M	Cell wall/membrane/envelope biogenesis	Cellular processes and sinaling	CYTOPLASMIC
NCDO2118_RS02220	tyrosyl-tRNA synthetase 434389:435648 reverse MW:47266	31	20	194.962	J	Translation, ribosomal structure and biogenesis	Information storage and processing	CYTOPLASMIC
NCDO2118_RS02855	enoyl-ACP reductase 553526:554278 forward MW:26396	31	20	232.49	I	Lipid transport and metabolism	Metabolism	CYTOPLASMIC
NCDO2118_RS06705	cytochrome C552 1390505:1392004 reverse MW:56151	31	20	178.828	Q	Secondary metabolites biosynthesis, transport and catabolism	Metabolism	CYTOPLASMIC
NCDO2118_RS10880	UDP-glucose 4-epimerase 2236737:2237717 reverse MW:36255	31	22	252.572	M	Cell wall/membrane/envelope biogenesis	Cellular processes and sinaling	CYTOPLASMIC
NCDO2118_RS10195	50S ribosomal protein L20 2107860:2108219 reverse MW:13665	31	23	146.227	J	Translation, ribosomal structure and biogenesis	Information storage and processing	CYTOPLASMIC
NCDO2118_RS10520	Unknown Function 2170133:2171248 reverse MW:41061	31	23	250.25	S	Function unknown	Poorly characterized	CYTOPLASMIC
NCDO2118_RS09595	3-phosphoshikimate 1-carboxyvinyltransferase 1986353:1987645 reverse MW:45975	31	24	218.987	E	Amino acid transport and metabolism	Metabolism	CYTOPLASMIC
NCDO2118_RS04220	chromosome segregation protein SMC 842262:845786 forward MW:132554	32	14	170.517	D	Cell cycle control, cell division, chromosome partitioning	Cellular processes and sinaling	CYTOPLASMIC
NCDO2118_RS10145	3'-5' exonuclease 2095370:2097745 reverse MW:89646	32	17	214.957	KL	Transcription	Information storage and processing	CYTOPLASMIC
NCDO2118_RS07820	alpha-mannosidase 1628358:1631045 reverse MW:102197	32	17	190.555	G	Carbohydrate transport and metabolism	Metabolism	CYTOPLASMIC
NCDO2118_RS12365	tRNA modification GTPase MnmE 2517900:2519267 forward MW:49879	32	17	202.429	R	General function prediction only	Poorly characterized	CYTOPLASMIC
NCDO2118_RS11415	50S ribosomal protein L15 2341262:2341705 reverse MW:15376	32	19	210.497	J	Translation, ribosomal structure and biogenesis	Information storage and processing	CYTOPLASMIC
NCDO2118_RS09060	Unknown Function 1875504:1877504 reverse MW:72110	32	20	220.06	S	Function unknown	Poorly characterized	PSE
NCDO2118_RS10720	adenylosuccinate synthetase 2208915:2210207 reverse MW:47326	32	20	255.818	F	Nucleotide transport and metabolism	Metabolism	CYTOPLASMIC
NCDO2118_RS08880	ribonuclease J 1835111:1836823 reverse MW:63538	32	22	193.542	R	General function prediction only	Poorly characterized	CYTOPLASMIC
NCDO2118_RS08425	UDP-N-acetylmuramoylalanine--D-glutamate ligase 1763272:1764624 reverse MW:49362	32	24	232.631	M	Cell wall/membrane/envelope biogenesis	Cellular processes and sinaling	PSE
NCDO2118_RS03920	Unknown Function 782838:784802 forward MW:74031	33	11	171.392	T	Signal transduction mechanisms	Cellular processes and sinaling	PSE
NCDO2118_RS05745	nicotinate phosphoribosyltransferase 1143723:1145195 forward MW:55870	33	19	218.552	H	Coenzyme transport and metabolism	Metabolism	CYTOPLASMIC
NCDO2118_RS01735	ribonuclease J 332087:333769 reverse MW:61516	33	20	179.897	R	General function prediction only	Poorly characterized	CYTOPLASMIC
NCDO2118_RS05420	ribonucleotide-diphosphate reductase subunit alpha 1083181:1085349 reverse MW:81522	34	17	218.722	F	Nucleotide transport and metabolism	Metabolism	CYTOPLASMIC
NCDO2118_RS06320	ribonuclease R 1304982:1306979 forward MW:75182	34	18	194.513	K	Transcription	Information storage and processing	CYTOPLASMIC
NCDO2118_RS00995	dTDP-glucose 4,6-dehydratase 193444:194496 forward MW:39603	34	19	224.793	M	Cell wall/membrane/envelope biogenesis	Cellular processes and sinaling	CYTOPLASMIC
NCDO2118_RS00400	GTP pyrophosphokinase 76974:79196 forward MW:83818	34	19	198.249	TK	Signal transduction mechanisms	Cellular processes and sinaling	CYTOPLASMIC
NCDO2118_RS00205	aminotransferase A 39007:40182 forward MW:43199	34	19	267.608	E	Amino acid transport and metabolism	Metabolism	CYTOPLASMIC
NCDO2118_RS00800	transcriptional regulator 156204:156992 forward MW:29096	34	19	189.009	K	Transcription	Information storage and processing	CYTOPLASMIC
NCDO2118_RS07490	membrane protein 1558811:1559863 reverse MW:36638	34	20	227.459	R	General function prediction only	Poorly characterized	PSE
NCDO2118_RS10905	aldose 1-epimerase 2244316:2245335 reverse MW:37385	34	21	309.721	G	Carbohydrate transport and metabolism	Metabolism	CYTOPLASMIC
NCDO2118_RS11785	Unknown Function 2407883:2408908 forward MW:37302	34	21	229.244	G	Carbohydrate transport and metabolism	Metabolism	CYTOPLASMIC
NCDO2118_RS01845	multidrug ABC transporter ATP-binding protein 352641:354380 forward MW:63908	34	22	226.806	V	Defense mechanisms	Cellular processes and sinaling	PSE
NCDO2118_RS09705	ATP synthase subunit alpha 2010473:2011975 reverse MW:54307	34	23	212.522	C	Energy production and conversion	Metabolism	CYTOPLASMIC
NCDO2118_RS09235	maltose ABC transporter substrate-binding protein 1916069:1917298 forward MW:43464	34	23	284.703	G	Carbohydrate transport and metabolism	Metabolism	PSE
NCDO2118_RS10305	cell division protein DivIVA 2131151:2132083 reverse MW:35133	34	24	225.085	D	Cell cycle control, cell division, chromosome partitioning	Cellular processes and sinaling	CYTOPLASMIC
NCDO2118_RS08160	dipeptidase 1704638:1706062 reverse MW:53689	34	24	257.266	E	Amino acid transport and metabolism	Metabolism	CYTOPLASMIC
NCDO2118_RS04265	ribose-phosphate pyrophosphokinase 1 855419:856393 forward MW:35529	34	25	260.722	FE	Nucleotide transport and metabolism	Metabolism	CYTOPLASMIC
NCDO2118_RS04050	mannose-6-phosphate isomerase 811212:812159 forward MW:35555	34	25	184.601	G	Carbohydrate transport and metabolism	Metabolism	CYTOPLASMIC
NCDO2118_RS08990	D-ribose transporter ATP-binding protein 1861494:1862972 reverse MW:54190	35	19	228.634	G	Carbohydrate transport and metabolism	Metabolism	CYTOPLASMIC
NCDO2118_RS01020	ABC transporter ATP-binding protein 198561:199757 forward MW:44899	35	20	238.522	GM	Carbohydrate transport and metabolism	Metabolism	CYTOPLASMIC
NCDO2118_RS00810	glutamyl-tRNA amidotransferase 157922:159382 forward MW:52133	35	22	242.081	J	Translation, ribosomal structure and biogenesis	Information storage and processing	CYTOPLASMIC
NCDO2118_RS11775	elongation factor Ts 2405606:2406634 reverse MW:36669	35	24	230.011	J	Translation, ribosomal structure and biogenesis	Information storage and processing	CYTOPLASMIC
NCDO2118_RS11000	50S ribosomal protein L1 2261794:2262483 reverse MW:24049	35	25	244.922	J	Translation, ribosomal structure and biogenesis	Information storage and processing	CYTOPLASMIC
NCDO2118_RS11405	adenylate kinase 2339078:2339725 reverse MW:23688	36	17	284.112	F	Nucleotide transport and metabolism	Metabolism	CYTOPLASMIC
NCDO2118_RS07155	fibronectin-binding protein 1492038:1493660 forward MW:61273	36	19	228.287	K	Transcription	Information storage and processing	CYTOPLASMIC
NCDO2118_RS07190	ATP-dependent 6-phosphofructokinase 1501063:1502085 reverse MW:35806	36	23	228.993	G	Carbohydrate transport and metabolism	Metabolism	CYTOPLASMIC
NCDO2118_RS06750	50S ribosomal protein L10 1400141:1400656 reverse MW:18086	36	24	265.716	J	Translation, ribosomal structure and biogenesis	Information storage and processing	CYTOPLASMIC
NCDO2118_RS06745	50S ribosomal protein L7/L12 1399706:1400071 reverse MW:12422	36	26	256.12	J	Translation, ribosomal structure and biogenesis	Information storage and processing	CYTOPLASMIC
NCDO2118_RS11455	50S ribosomal protein L5 2345599:2346141 reverse MW:20006	36	27	268.435	J	Translation, ribosomal structure and biogenesis	Information storage and processing	CYTOPLASMIC
NCDO2118_RS00220	dihydrolipoamide acetyltransferase 43005:44603 reverse MW:56257	37	18	238.544	C	Energy production and conversion	Metabolism	CYTOPLASMIC
NCDO2118_RS04880	phosphopentomutase 993392:994627 forward MW:45742	37	21	249.605	G	Carbohydrate transport and metabolism	Metabolism	CYTOPLASMIC
NCDO2118_RS12345	2-hydroxyglutaryl-CoA dehydratase 2510817:2515127 reverse MW:159760	37	22	209.182	I	Lipid transport and metabolism	Metabolism	CYTOPLASMIC
NCDO2118_RS07205	tellurite resistance protein TelA 1503792:1504970 reverse MW:44310	37	22	259.889	P	Inorganic ion transport and metabolism	Metabolism	CYTOPLASMIC
NCDO2118_RS02395	DNA ligase 468841:470805 forward MW:72708	37	23	242.098	L	Replication, recombination and repair	Information storage and processing	CYTOPLASMIC
NCDO2118_RS11380	DNA-directed RNA polymerase subunit alpha 2336620:2337558 reverse MW:34150	37	27	247.704	K	Transcription	Information storage and processing	CYTOPLASMIC
NCDO2118_RS10805	histidine--tRNA ligase 2222563:2223855 reverse MW:49020	37	27	243.187	J	Translation, ribosomal structure and biogenesis	Information storage and processing	CYTOPLASMIC
NCDO2118_RS03030	serine hydroxymethyltransferase 583060:584307 forward MW:44819	38	21	247.256	E	Amino acid transport and metabolism	Metabolism	CYTOPLASMIC
NCDO2118_RS11720	Unknown Function 2390745:2391749 forward MW:36670	38	22	256.124	S	Function unknown	Poorly characterized	PSE
NCDO2118_RS11060	acetate kinase 2270951:2272138 reverse MW:43196	39	19	286.729	C	Energy production and conversion	Metabolism	CYTOPLASMIC
NCDO2118_RS06460	DNA topoisomerase I 1333433:1335565 forward MW:80728	39	21	242.337	L	Replication, recombination and repair	Information storage and processing	CYTOPLASMIC
NCDO2118_RS11170	ornithine carbamoyltransferase 2292866:2293930 reverse MW:39456	39	24	308.021	E	Amino acid transport and metabolism	Metabolism	CYTOPLASMIC
NCDO2118_RS03230	protease 622649:623545 forward MW:33071	39	24	267.907	O	Posttranslational modification, protein turnover, chaperones	Cellular processes and sinaling	MEMBRANE
NCDO2118_RS04380	dipeptidase PepV 885658:887076 forward MW:51896	39	25	293.621	E	Amino acid transport and metabolism	Metabolism	CYTOPLASMIC
NCDO2118_RS00005	chromosomal replication initiator protein DnaA 575:1942 forward MW:51461	39	25	267.333	L	Replication, recombination and repair	Information storage and processing	CYTOPLASMIC
NCDO2118_RS02790	RNA polymerase sigma factor SigA 538439:539599 forward MW:44080	39	26	291.444	K	Transcription	Information storage and processing	CYTOPLASMIC
NCDO2118_RS09105	phosphotransacetylase 1885273:1886253 reverse MW:35256	39	30	275.716	C	Energy production and conversion	Metabolism	CYTOPLASMIC
NCDO2118_RS01085	glycerophosphoryl diester phosphodiesterase 212805:214031 forward MW:45611	39	34	270.772	C	Energy production and conversion	Metabolism	PSE
NCDO2118_RS03895	flotillin 777487:778998 forward MW:53713	40	21	247.744	S	Function unknown	Poorly characterized	PSE
NCDO2118_RS00740	LytR family transcriptional regulator 145677:146600 reverse MW:34520	40	21	234.549	K	Transcription	Information storage and processing	SECRETED
NCDO2118_RS11505	50S ribosomal protein L23 2350211:2350504 reverse MW:10743	40	26	279.93	J	Translation, ribosomal structure and biogenesis	Information storage and processing	CYTOPLASMIC
NCDO2118_RS10080	excinuclease ABC subunit A 2083075:2085897 reverse MW:104342	40	26	213.827	L	Replication, recombination and repair	Information storage and processing	CYTOPLASMIC
NCDO2118_RS09400	serine--tRNA ligase 1946201:1947472 forward MW:47469	40	27	240.748	J	Translation, ribosomal structure and biogenesis	Information storage and processing	CYTOPLASMIC
NCDO2118_RS09035	DNA mismatch repair protein MutS 1868734:1871064 reverse MW:87241	40	29	242.613	L	Replication, recombination and repair	Information storage and processing	CYTOPLASMIC
NCDO2118_RS02020	D-alanine--D-alanine ligase 387668:388717 forward MW:38737	41	27	263.726	M	Cell wall/membrane/envelope biogenesis	Cellular processes and sinaling	CYTOPLASMIC
NCDO2118_RS11175	arginine deiminase 2294114:2295346 reverse MW:46043	41	27	275.924	E	Amino acid transport and metabolism	Metabolism	CYTOPLASMIC
NCDO2118_RS03130	Unknown Function 599745:600308 forward MW:20604	41	27	276.337	S	Function unknown	Poorly characterized	PSE
NCDO2118_RS12170	glutamine synthetase 2477388:2478728 reverse MW:49753	41	32	331.49	E	Amino acid transport and metabolism	Metabolism	CYTOPLASMIC
NCDO2118_RS00035	GTP-binding protein 11336:12451 forward MW:41242	41	32	291.817	J	Translation, ribosomal structure and biogenesis	Information storage and processing	CYTOPLASMIC
NCDO2118_RS10885	beta-D-galactosidase 2237769:2240759 reverse MW:115147	42	27	276	G	Carbohydrate transport and metabolism	Metabolism	CYTOPLASMIC
NCDO2118_RS06855	glutamate decarboxylase 1422562:1423962 reverse MW:53942	42	27	312.495	E	Amino acid transport and metabolism	Metabolism	CYTOPLASMIC
NCDO2118_RS11500	50S ribosomal protein L2 2349365:2350195 reverse MW:29582	42	27	302.413	J	Translation, ribosomal structure and biogenesis	Information storage and processing	CYTOPLASMIC
NCDO2118_RS11425	30S ribosomal protein S5 2342170:2342676 reverse MW:17595	42	28	164.918	J	Translation, ribosomal structure and biogenesis	Information storage and processing	CYTOPLASMIC
NCDO2118_RS02280	PhoP family transcriptional regulator 447353:448054 reverse MW:26765	42	30	260.607	TK	Signal transduction mechanisms	Cellular processes and sinaling	CYTOPLASMIC
NCDO2118_RS04355	30S ribosomal protein S1 879230:880456 forward MW:44710	42	31	310.98	J	Translation, ribosomal structure and biogenesis	Information storage and processing	CYTOPLASMIC
NCDO2118_RS10330	cell division protein FtsZ 2134508:2135761 reverse MW:43988	43	31	272.603	D	Cell cycle control, cell division, chromosome partitioning	Cellular processes and sinaling	CYTOPLASMIC
NCDO2118_RS02065	RNA helicase 399971:401614 forward MW:61003	44	21	312.437	LKJ	Replication, recombination and repair	Information storage and processing	CYTOPLASMIC
NCDO2118_RS11435	50S ribosomal protein L6 2343258:2343794 reverse MW:19257	44	31	232.774	J	Translation, ribosomal structure and biogenesis	Information storage and processing	CYTOPLASMIC
NCDO2118_RS01100	inosine-5-monophosphate dehydrogenase	44	33	344.449	F	Nucleotide transport and metabolism	Metabolism	CYTOPLASMIC
NCDO2118_RS10260	polynucleotide phosphorylase 2118733:2121054 reverse MW:84535	44	34	291.175	J	Translation, ribosomal structure and biogenesis	Information storage and processing	CYTOPLASMIC
NCDO2118_RS00110	ATP-dependent zinc metalloprotease FtsH	44	34	268.032	O	Posttranslational modification, protein turnover, chaperones	Cellular processes and sinaling	PSE
NCDO2118_RS07765	GMP synthase 1613643:1615184 reverse MW:56866	45	27	363.709	F	Nucleotide transport and metabolism	Metabolism	CYTOPLASMIC
NCDO2118_RS08870	signal recognition particle protein 1830503:1832059 reverse MW:56892	45	28	314.245	U	Intracellular trafficking, secretion, and vesicular transport	Cellular processes and sinaling	CYTOPLASMIC
NCDO2118_RS09895	neutral endopeptidase 2051216:2053099 forward MW:71520	45	28	289.122	O	Posttranslational modification, protein turnover, chaperones	Cellular processes and sinaling	CYTOPLASMIC
NCDO2118_RS01810	aminopeptidase N	45	29	340.852	E	Amino acid transport and metabolism	Metabolism	CYTOPLASMIC
NCDO2118_RS04275	leucine--tRNA ligase	45	34	348.976	J	Translation, ribosomal structure and biogenesis	Information storage and processing	CYTOPLASMIC
NCDO2118_RS00955	dihydroxyacetone kinase	46	29	291.051	R	General function prediction only	Poorly characterized	CYTOPLASMIC
NCDO2118_RS09935	peptidase T	46	32	314.664	E	Amino acid transport and metabolism	Metabolism	CYTOPLASMIC
NCDO2118_RS11040	ribosome-recycling factor	47	27	328.427	J	Translation, ribosomal structure and biogenesis	Information storage and processing	CYTOPLASMIC
NCDO2118_RS11245	Xaa-Pro dipeptidyl-peptidase	47	27	309.667	E	Amino acid transport and metabolism	Metabolism	CYTOPLASMIC
NCDO2118_RS10265	Unknown Function	47	28	296.95	S	Function unknown	Poorly characterized	PSE
NCDO2118_RS11265	glutamate--tRNA ligase	47	33	346.692	J	Translation, ribosomal structure and biogenesis	Information storage and processing	CYTOPLASMIC
NCDO2118_RS03000	peptide chain release factor 1	47	33	346.855	J	Translation, ribosomal structure and biogenesis	Information storage and processing	CYTOPLASMIC
NCDO2118_RS04310	NADH dehydrogenase	47	35	279.087	C	Energy production and conversion	Metabolism	PSE
NCDO2118_RS10530	fructose-bisphosphate aldolase	47	36	331.562	G	Carbohydrate transport and metabolism	Metabolism	CYTOPLASMIC
NCDO2118_RS05785	elongation factor 4	48	26	316.596	M	Cell wall/membrane/envelope biogenesis	Cellular processes and sinaling	CYTOPLASMIC
NCDO2118_RS09370	PTS mannose transporter subunit IIAB	48	36	254.627	G	Carbohydrate transport and metabolism	Metabolism	CYTOPLASMIC
NCDO2118_RS05855	fumarate reductase	49	32	317.018	C	Energy production and conversion	Metabolism	PSE
NCDO2118_RS08915	transketolase	49	33	366.432	G	Carbohydrate transport and metabolism	Metabolism	CYTOPLASMIC
NCDO2118_RS09010	adenylosuccinate lyase	50	27	314.569	F	Nucleotide transport and metabolism	Metabolism	CYTOPLASMIC
NCDO2118_RS07565	glycine/betaine ABC transporter ATP-binding protein	50	28	364.203	E	Amino acid transport and metabolism	Metabolism	CYTOPLASMIC
NCDO2118_RS02835	excinuclease ABC subunit B	50	31	319.389	L	Replication, recombination and repair	Information storage and processing	CYTOPLASMIC
NCDO2118_RS03135	6-phosphogluconate dehydrogenase	50	35	336.601	G	Carbohydrate transport and metabolism	Metabolism	CYTOPLASMIC
NCDO2118_RS01400	enolase	51	23	323.797	G	Carbohydrate transport and metabolism	Metabolism	CYTOPLASMIC
NCDO2118_RS11730	DNA polymerase I	51	29	319.849	L	Replication, recombination and repair	Information storage and processing	CYTOPLASMIC
NCDO2118_RS01710	30S ribosomal protein S4	51	37	329.017	J	Translation, ribosomal structure and biogenesis	Information storage and processing	CYTOPLASMIC
NCDO2118_RS10335	cell division protein FtsA	52	35	379.796	D	Cell cycle control, cell division, chromosome partitioning	Cellular processes and sinaling	CYTOPLASMIC
NCDO2118_RS11780	30S ribosomal protein S2	52	36	316.086	J	Translation, ribosomal structure and biogenesis	Information storage and processing	CYTOPLASMIC
NCDO2118_RS12265	glucose-6-phosphate 1-dehydrogenase	53	27	359.412	G	Carbohydrate transport and metabolism	Metabolism	CYTOPLASMIC
NCDO2118_RS11770	septation ring formation regulator EzrA	53	28	401.877	D	Cell cycle control, cell division, chromosome partitioning	Cellular processes and sinaling	PSE
NCDO2118_RS04165	methionyl-tRNA synthetase	53	32	430.604	J	Translation, ribosomal structure and biogenesis	Information storage and processing	CYTOPLASMIC
NCDO2118_RS00280	ABC transporter ATP-binding protein	53	37	341.05	R	General function prediction only	Poorly characterized	CYTOPLASMIC
NCDO2118_RS02690	trigger factor	53	42	332.311	O	Posttranslational modification, protein turnover, chaperones	Cellular processes and sinaling	CYTOPLASMIC
NCDO2118_RS05800	DNA gyrase subunit A	54	25	304.597	L	Replication, recombination and repair	Information storage and processing	CYTOPLASMIC
NCDO2118_RS10595	threonine--tRNA ligase	54	30	359.635	J	Translation, ribosomal structure and biogenesis	Information storage and processing	CYTOPLASMIC
NCDO2118_RS02160	lysyl-tRNA synthetase	54	41	408.091	J	Translation, ribosomal structure and biogenesis	Information storage and processing	CYTOPLASMIC
NCDO2118_RS02580	DNA-binding protein HU	55	46	164.28	L	Replication, recombination and repair	Information storage and processing	CYTOPLASMIC
NCDO2118_RS04040	translation initiation factor IF-2	57	35	406.353	J	Translation, ribosomal structure and biogenesis	Information storage and processing	CYTOPLASMIC
NCDO2118_RS05535	glucosamine--fructose-6-phosphate aminotransferase	57	36	416.887	M	Cell wall/membrane/envelope biogenesis	Cellular processes and sinaling	CYTOPLASMIC
NCDO2118_RS10900	galactokinase	57	38	391.105	G	Carbohydrate transport and metabolism	Metabolism	CYTOPLASMIC
NCDO2118_RS11650	DNA polymerase III PolC	58	34	309.144	L	Replication, recombination and repair	Information storage and processing	CYTOPLASMIC
NCDO2118_RS09670	amino acid ABC transporter permease	58	36	443.221	ET	Amino acid transport and metabolism	Metabolism	PSE
NCDO2118_RS11075	GTP-binding protein	58	39	387.998	T	Signal transduction mechanisms	Cellular processes and sinaling	CYTOPLASMIC
NCDO2118_RS07985	chaperone protein ClpB	59	35	380.827	O	Posttranslational modification, protein turnover, chaperones	Cellular processes and sinaling	CYTOPLASMIC
NCDO2118_RS11185	arginine--tRNA ligase	59	42	419.276	J	Translation, ribosomal structure and biogenesis	Information storage and processing	CYTOPLASMIC
NCDO2118_RS02035	ABC transporter substrate-binding protein	60	40	397.929	E	Amino acid transport and metabolism	Metabolism	PSE
NCDO2118_RS00460	phosphoenolpyruvate-protein phosphotransferase	60	46	440.144	G	Carbohydrate transport and metabolism	Metabolism	CYTOPLASMIC
NCDO2118_RS04025	transcription termination factor NusA	61	39	360.83	K	Transcription	Information storage and processing	CYTOPLASMIC
NCDO2118_RS00445	preprotein translocase subunit SecA	62	37	400.666	U	Intracellular trafficking, secretion, and vesicular transport	Cellular processes and sinaling	CYTOPLASMIC
NCDO2118_RS01385	ribonucleoside triphosphate reductase	63	39	354.19	F	Nucleotide transport and metabolism	Metabolism	CYTOPLASMIC
NCDO2118_RS02810	ATP-dependent Clp protease ATP-binding subunit ClpE	65	34	434.638	O	Posttranslational modification, protein turnover, chaperones	Cellular processes and sinaling	CYTOPLASMIC
NCDO2118_RS09695	ATP synthase subunit beta	65	42	511.005	C	Energy production and conversion	Metabolism	CYTOPLASMIC
NCDO2118_RS12385	glyceraldehyde-3-phosphate dehydrogenase	65	49	298.202	G	Carbohydrate transport and metabolism	Metabolism	CYTOPLASMIC
NCDO2118_RS00820	aspartyl/glutamyl-tRNA(Asn/Gln) amidotransferase subunit B	66	41	443.726	J	Translation, ribosomal structure and biogenesis	Information storage and processing	CYTOPLASMIC
NCDO2118_RS10795	aspartyl-tRNA synthetase	67	41	451.283	J	Translation, ribosomal structure and biogenesis	Information storage and processing	CYTOPLASMIC
NCDO2118_RS11665	prolyl-tRNA synthetase	67	43	475.26	J	Translation, ribosomal structure and biogenesis	Information storage and processing	CYTOPLASMIC
NCDO2118_RS03355	pyruvate carboxylase	67	46	481.847	C	Energy production and conversion	Metabolism	CYTOPLASMIC
NCDO2118_RS07185	pyruvate kinase	67	47	487.974	G	Carbohydrate transport and metabolism	Metabolism	CYTOPLASMIC
NCDO2118_RS04750	DNA gyrase subunit B	69	41	426.51	R	General function prediction only	Poorly characterized	CYTOPLASMIC
NCDO2118_RS01715	Unknown Function	73	44	484.724	K	Transcription	Information storage and processing	CYTOPLASMIC
NCDO2118_RS11790	alcohol dehydrogenase	75	53	554.571	C	Energy production and conversion	Metabolism	CYTOPLASMIC
NCDO2118_RS12500	elongation factor G	78	56	526.129	J	Translation, ribosomal structure and biogenesis	Information storage and processing	CYTOPLASMIC
NCDO2118_RS02265	molecular chaperone GroEL	78	57	533.064	O	Posttranslational modification, protein turnover, chaperones	Cellular processes and sinaling	CYTOPLASMIC
NCDO2118_RS01235	phosphoglycerate kinase	81	58	564.824	G	Carbohydrate transport and metabolism	Metabolism	CYTOPLASMIC
NCDO2118_RS09880	DNA-directed RNA polymerase subunit beta	85	52	637.572	K	Transcription	Information storage and processing	CYTOPLASMIC
NCDO2118_RS05315	molecular chaperone DnaK	87	61	654.1	O	Posttranslational modification, protein turnover, chaperones	Cellular processes and sinaling	CYTOPLASMIC
NCDO2118_RS10290	elongation factor Tu	89	65	405.687	J	Translation, ribosomal structure and biogenesis	Information storage and processing	CYTOPLASMIC
NCDO2118_RS03300	enolase	90	52	478.361	G	Carbohydrate transport and metabolism	Metabolism	CYTOPLASMIC
NCDO2118_RS03330	formate acetyltransferase	91	71	602.665	C	Energy production and conversion	Metabolism	CYTOPLASMIC
NCDO2118_RS10300	isoleucyl-tRNA synthetase	94	55	639.253	J	Translation, ribosomal structure and biogenesis	Information storage and processing	CYTOPLASMIC
NCDO2118_RS07330	carbamoyl phosphate synthase large subunit	95	71	621.823	EF	Amino acid transport and metabolism	Metabolism	CYTOPLASMIC
NCDO2118_RS09495	alanine--tRNA ligase	99	66	697.229	J	Translation, ribosomal structure and biogenesis	Information storage and processing	CYTOPLASMIC
NCDO2118_RS11890	valyl-tRNA synthetase	100	71	649.819	J	Translation, ribosomal structure and biogenesis	Information storage and processing	CYTOPLASMIC
NCDO2118_RS09875	DNA-directed RNA polymerase subunit beta'	156	107	1031.88	K	Transcription	Information storage and processing	CYTOPLASMIC
NCDO2118_RS08110	hypothetical protein 1695749:1696018 reverse MW:10403	1	1	8.5984
NCDO2118_RS00665	hypothetical protein 124360:124680 reverse MW:12328	1	1	6.0883
NCDO2118_RS05040	hypothetical protein 1011277:1011507 forward MW:9235	1	1	6.2031
NCDO2118_RS12070	phage protein 2467131:2467499 reverse MW:14661	1	1	5.8073
NCDO2118_RS07660	membrane protein 1592384:1593064 reverse MW:24167	1	1	6.59
NCDO2118_RS01435	membrane protein 277456:277644 forward MW:7056	1	1	7.1196
NCDO2118_RS05780	alpha-acetolactate decarboxylase 1152403:1153068 forward MW:24790	1	1	6.3663
NCDO2118_RS09485	SsrA-binding protein 1962046:1962513 reverse MW:17948	1	1	7.0293
NCDO2118_RS09070	hypothetical protein 1878876:1879040 reverse MW:6178	1	1	4.9551
NCDO2118_RS07020	esterase 1459972:1460745 reverse MW:28677	1	1	4.3261
NCDO2118_RS04435	hypothetical protein 897492:898031 forward MW:21619	1	1	6.35
NCDO2118_RS10670	hypothetical protein 2198493:2198750 reverse MW:9502	1	1	6.3609
NCDO2118_RS12215	DNA mismatch repair protein MutL 2485787:2487757 reverse MW:73713	1	1	4.7265
NCDO2118_RS01575	hypothetical protein 301572:301883 forward MW:11268	1	1	8.2204
NCDO2118_RS07925	phosphoribosyl carboxyaminoimidazole mutase 1659113:1659598 reverse MW:16849	1	1	5.2261
NCDO2118_RS08210	RNA-binding protein 1714052:1714291 reverse MW:9017	1	1	6.6585
NCDO2118_RS00950	methionine sulfoxide reductase B 187242:187670 forward MW:16071	1	1	6.1553
NCDO2118_RS11675	phosphatidate cytidylyltransferase 2382546:2383349 reverse MW:29162	1	1	7.1377
NCDO2118_RS12040	hypothetical protein 2463770:2464075 reverse MW:11303	1	1	9.2205
NCDO2118_RS01635	transposase 313713:314204 forward MW:18949	1	1	4.7145
NCDO2118_RS02400	transcriptional regulator 470961:471986 forward MW:37206	1	1	6.7383
NCDO2118_RS00520	hypothetical protein 100435:100686 forward MW:9626	1	1	6.9399
NCDO2118_RS11020	hypothetical protein 2265058:2265267 reverse MW:8320	1	1	8.6763
NCDO2118_RS04655	glyoxalase 941034:941867 forward MW:32028	1	1	4.8312
NCDO2118_RS02885	pantothenic acid transporter pant 558676:559266 reverse MW:20711	1	1	6.6256
NCDO2118_RS02995	hypothetical protein 577618:578061 forward MW:17580	1	1	5.6632
NCDO2118_RS02285	thymidylate kinase 448232:448867 forward MW:24013	1	1	6.0387
NCDO2118_RS08040	4-carboxymuconolactone decarboxylase 1684474:1684788 reverse MW:11841	1	1	5.3317
NCDO2118_RS08895	DNA mismatch repair protein MutT 1839122:1839577 reverse MW:17582	1	1	4.5113
NCDO2118_RS10730	bacteriocin 2211359:2211517 reverse MW:5745	1	1	7.2979
NCDO2118_RS09395	regulator 1945446:1945817 forward MW:13774	1	1	6.9563
NCDO2118_RS03720	cytochrome C oxidase assembly protein 736548:737543 forward MW:36795	1	1	14.8116
NCDO2118_RS02665	Regulatory protein Spx 1 524890:525276 forward MW:14835	1	1	7.5844
NCDO2118_RS11910	GNAT family acetyltransferase 2435068:2435577 reverse MW:19561	1	1	11.5044
NCDO2118_RS12080	hypothetical protein 2468163:2468351 partial 3' reverse MW:7072	1	1	17.384
NCDO2118_RS09290	transcriptional regulator 1924381:1924683 forward MW:11909	1	1	4.8402
NCDO2118_RS07175	sugar ABC transporter permease 1497298:1498251 forward MW:33552	1	1	11.4758

## Sheet: Table S.3
Table S.3: Exclusive proteome of AN condition
Accession	Score	Description	COG Symbol	Biological Process	SURFG
NCDO2118_RS07635	10.1186	anthranilate synthase component I	EH	Amino acid transport and metabolism	CYTOPLASMIC
NCDO2118_RS06370	18.5329	imidazole glycerol phosphate synthase	E	Amino acid transport and metabolism	CYTOPLASMIC
NCDO2118_RS09485	17.1226	SsrA-binding protein	E	Amino acid transport and metabolism	CYTOPLASMIC
NCDO2118_RS06825	8.8971	diaminopimelate decarboxylase	E	Amino acid transport and metabolism	CYTOPLASMIC
NCDO2118_RS04405	10.488	ABC transporter ATPase	E	Amino acid transport and metabolism	CYTOPLASMIC
NCDO2118_RS07690	21.8901	Unknown Function	E	Amino acid transport and metabolism	PSE
NCDO2118_RS04320	42.8113	serine dehydratase subunit alpha	E	Amino acid transport and metabolism	CYTOPLASMIC
NCDO2118_RS09770	61.8944	TenA family transcriptional regulator	E	Amino acid transport and metabolism	CYTOPLASMIC
NCDO2118_RS03745	8.7697	lysophospholipase	E	Amino acid transport and metabolism	CYTOPLASMIC
NCDO2118_RS01990	10.0347	glyoxalase	E	Amino acid transport and metabolism	CYTOPLASMIC
NCDO2118_RS06405	31.1022	isopropylmalate isomerase	E	Amino acid transport and metabolism	CYTOPLASMIC
NCDO2118_RS07840	31.3084	phosphoketolase	G	Carbohydrate transport and metabolism	CYTOPLASMIC
NCDO2118_RS03685	29.2416	glucose-1-phosphate adenylyltransferase	G	Carbohydrate transport and metabolism	CYTOPLASMIC
NCDO2118_RS03695	20.3749	glycogen synthase	G	Carbohydrate transport and metabolism	CYTOPLASMIC
NCDO2118_RS09205	56.0967	maltose phosphorylase	G	Carbohydrate transport and metabolism	CYTOPLASMIC
NCDO2118_RS11675	22.9574	phosphatidate cytidylyltransferase	GE	Carbohydrate transport and metabolism	MEMBRANE
NCDO2118_RS09170	47.8441	phage infection protein	G	Carbohydrate transport and metabolism	PSE
NCDO2118_RS01310	20.9484	carbohydrate kinase	G	Carbohydrate transport and metabolism	CYTOPLASMIC
NCDO2118_RS06655	37.0764	cytochrome C oxidase subunit II	G	Carbohydrate transport and metabolism	CYTOPLASMIC
NCDO2118_RS07790	99.5865	endo-beta-N-acetylglucosaminidase	G	Carbohydrate transport and metabolism	PSE
NCDO2118_RS06940	17.3062	sugar ABC transporter substrate-binding protein	G	Carbohydrate transport and metabolism	PSE
NCDO2118_RS03700	92.5641	glycogen phosphorylase	G	Carbohydrate transport and metabolism	CYTOPLASMIC
NCDO2118_RS08285	14.101	altronate hydrolase	G	Carbohydrate transport and metabolism	CYTOPLASMIC
NCDO2118_RS08970	15.22	GntR family transcriptional regulator	G	Carbohydrate transport and metabolism	CYTOPLASMIC
NCDO2118_RS09230	126.654	neopullulanase	G	Carbohydrate transport and metabolism	CYTOPLASMIC
NCDO2118_RS07275	34.1975	6-phospho-beta-glucosidase	G	Carbohydrate transport and metabolism	CYTOPLASMIC
NCDO2118_RS09080	21.1362	DNA polymerase III subunit delta	D	Cell cycle control, cell division, chromosome partitioning	CYTOPLASMIC
NCDO2118_RS04790	10.256	exopolysaccharide biosynthesis protein	M	Cell wall/membrane/envelope biogenesis	MEMBRANE
NCDO2118_RS04580	26.689	glycosyl transferase	M	Cell wall/membrane/envelope biogenesis	MEMBRANE
NCDO2118_RS05180	15.1128	lysozyme	M	Cell wall/membrane/envelope biogenesis	CYTOPLASMIC
NCDO2118_RS00405	10.7645	glucosyl transferase family 2	M	Cell wall/membrane/envelope biogenesis	MEMBRANE
NCDO2118_RS01465	10.8237	UDP-N-acetylglucosamine 2-epimerase	M	Cell wall/membrane/envelope biogenesis	CYTOPLASMIC
NCDO2118_RS08340	18.9487	Replication protein RepB	M	Cell wall/membrane/envelope biogenesis	CYTOPLASMIC
NCDO2118_RS07435	18.7791	1,4-beta-N-acetylmuramidase	M	Cell wall/membrane/envelope biogenesis	SECRETED
NCDO2118_RS10075	49.1616	uracil DNA glycosylase	H	Coenzyme transport and metabolism	CYTOPLASMIC
NCDO2118_RS06010	13.0016	dihydropteroate synthase	H	Coenzyme transport and metabolism	CYTOPLASMIC
NCDO2118_RS05475	24.8981	riboflavin synthase subunit alpha	H	Coenzyme transport and metabolism	CYTOPLASMIC
NCDO2118_RS04465	25.7713	bifunctional protein FolD	H	Coenzyme transport and metabolism	CYTOPLASMIC
NCDO2118_RS03860	19.6238	isochorismate synthase	HQ	Coenzyme transport and metabolism	CYTOPLASMIC
NCDO2118_RS05370	30.9119	ABC transporter ATP-binding protein	V	Defense mechanisms	CYTOPLASMIC
NCDO2118_RS01875	41.9092	ABC transporter permease	V	Defense mechanisms	PSE
NCDO2118_RS01335	24.0205	multidrug ABC transporter ATP-binding protein	V	Defense mechanisms	PSE
NCDO2118_RS11020	24.7474	Unknown Function	V	Defense mechanisms	CYTOPLASMIC
NCDO2118_RS05765	20.7479	ABC transporter permease	V	Defense mechanisms	PSE
NCDO2118_RS05760	20.9821	ABC transporter ATP-binding protein	V	Defense mechanisms	CYTOPLASMIC
NCDO2118_RS04400	32.4021	glutathione reductase	C	Energy production and conversion	CYTOPLASMIC
NCDO2118_RS04730	10.3162	malolactic enzyme	C	Energy production and conversion	CYTOPLASMIC
NCDO2118_RS03970	20.0722	nitroreductase	C	Energy production and conversion	CYTOPLASMIC
NCDO2118_RS09680	78.1574	Unknown Function	CP	Energy production and conversion	PSE
NCDO2118_RS03730	10.6846	cytochrome C nitrate reductase	CO	Energy production and conversion	PSE
NCDO2118_RS1069	117.862	phenylalanine--tRNA ligase subunit alpha	C	Energy production and conversion	CYTOPLASMIC
NCDO2118_RS08150	10.005	alcohol dehydrogenase	C	Energy production and conversion	CYTOPLASMIC
NCDO2118_RS07555	11.7771	Unknown Function	S	Function unknown	MEMBRANE
NCDO2118_RS12040	16.2168	Unknown Function	S	Function unknown	CYTOPLASMIC
NCDO2118_RS08415	56.0726	cell division protein DivIB	S	Function unknown	PSE
NCDO2118_RS08110	13.1993	Unknown Function	S	Function unknown	CYTOPLASMIC
NCDO2118_RS01765	14.345	Unknown Function	S	Function unknown	CYTOPLASMIC
NCDO2118_RS01430	54.1521	Unknown Function	S	Function unknown	MEMBRANE
NCDO2118_RS10960	16.8357	methyltransferase	S	Function unknown	CYTOPLASMIC
NCDO2118_RS09310	21.5028	LytR family transcriptional regulator	S	Function unknown	PSE
NCDO2118_RS03560	22.4179	Unknown Function	S	Function unknown	CYTOPLASMIC
NCDO2118_RS05060	16.7171	Unknown Function	S	Function unknown	CYTOPLASMIC
NCDO2118_RS11050	31.2569	Unknown Function	S	Function unknown	MEMBRANE
NCDO2118_RS06255	78.9502	Unknown Function	S	Function unknown	CYTOPLASMIC
NCDO2118_RS00990	14.0458	Unknown Function	S	Function unknown	CYTOPLASMIC
NCDO2118_RS03410	17.2792	Unknown Function	S	Function unknown	CYTOPLASMIC
NCDO2118_RS02670	14.2009	Unknown Function	S	Function unknown	CYTOPLASMIC
NCDO2118_RS09090	69.1047	cell division protein FtsK	S	Function unknown	PSE
NCDO2118_RS00860	95.0211	Unknown Function	S	Function unknown	CYTOPLASMIC
NCDO2118_RS00850	25.3406	Unknown Function	S	Function unknown	CYTOPLASMIC
NCDO2118_RS03890	28.0305	Unknown Function	S	Function unknown	MEMBRANE
NCDO2118_RS10110	29.3505	thiamine pyrophosphokinase	S	Function unknown	CYTOPLASMIC
NCDO2118_RS07405	61.0034	aldo/keto reductase	S	Function unknown	PSE
NCDO2118_RS03825	12.999	Unknown Function	S	Function unknown	PSE
NCDO2118_RS06250	27.9794	Unknown Function	S	Function unknown	CYTOPLASMIC
NCDO2118_RS03170	14.9039	Unknown Function	S	Function unknown	CYTOPLASMIC
NCDO2118_RS00530	14.3311	Unknown Function	S	Function unknown	CYTOPLASMIC
NCDO2118_RS08320	9.677	Unknown Function	S	Function unknown	CYTOPLASMIC
NCDO2118_RS06535	31.7888	sugar ABC transporter ATP-binding protein	R	General function prediction only	CYTOPLASMIC
NCDO2118_RS05325	16.4744	peptidase M20	R	General function prediction only	CYTOPLASMIC
NCDO2118_RS06900	8.7634	zinc-binding protein	R	General function prediction only	PSE
NCDO2118_RS06525	21.9204	multidrug ABC transporter permease	R	General function prediction only	MEMBRANE
NCDO2118_RS00770	25.4969	CoA-binding protein	R	General function prediction only	CYTOPLASMIC
NCDO2118_RS02900	12.4504	tautomerase	R	General function prediction only	CYTOPLASMIC
NCDO2118_RS00775	13.6682	DNAse	R	General function prediction only	PSE
NCDO2118_RS11955	19.7472	gluconate permease	R	General function prediction only	MEMBRANE
NCDO2118_RS02250	50.0801	NADH oxidase	R	General function prediction only	CYTOPLASMIC
NCDO2118_RS02540	15.2173	lysine decarboxylase	R	General function prediction only	CYTOPLASMIC
NCDO2118_RS10980	43.7997	glycerophosphodiester phosphodiesterase	R	General function prediction only	PSE
NCDO2118_RS04655	12.4822	glyoxalase	R	General function prediction only	CYTOPLASMIC
NCDO2118_RS06415	29.7871	molybdenum ABC transporter ATP-binding protein	P	Inorganic ion transport and metabolism	CYTOPLASMIC
NCDO2118_RS11090	21.8898	peptide ABC transporter ATP-binding protein	U	Intracellular trafficking, secretion, and vesicular transport	CYTOPLASMIC
NCDO2118_RS02455	9.6381	sugar hydrolase	I	Lipid transport and metabolism	CYTOPLASMIC
NCDO2118_RS02400	16.4863	transcriptional regulator	IR	Lipid transport and metabolism	CYTOPLASMIC
NCDO2118_RS09510	72.625	oligopeptidase PepB	IR	Lipid transport and metabolism	CYTOPLASMIC
NCDO2118_RS02325	21.2106	phosphomevalonate kinase	I	Lipid transport and metabolism	CYTOPLASMIC
NCDO2118_RS06695	16.0482	D-alanine--poly(phosphoribitol) ligase subunit 2	IQ	Lipid transport and metabolism	CYTOPLASMIC
NCDO2118_RS08005	15.7532	short-chain dehydrogenase	IQR	Lipid transport and metabolism	CYTOPLASMIC
NCDO2118_RS11570	27.4208	Unknown Function	I	Lipid transport and metabolism	PSE
NCDO2118_RS06180	18.0554	PKS acyl-CoA transferase	I	Lipid transport and metabolism	CYTOPLASMIC
NCDO2118_RS11610	9.4531	competence protein ComGF	X	Mobilome: prophages, transposons	MEMBRANE
NCDO2118_RS05140	21.4819	tail protein	X	Mobilome: prophages, transposons	CYTOPLASMIC
NCDO2118_RS09395	21.991	regulator	O	Posttranslational modification, protein turnover, chaperones	CYTOPLASMIC
NCDO2118_RS09900	10.6666	methylated-DNA--protein-cysteine methyltransferase	O	Posttranslational modification, protein turnover, chaperones	CYTOPLASMIC
NCDO2118_RS02110	9.6791	dithiol-disulfide isomerase	O	Posttranslational modification, protein turnover, chaperones	CYTOPLASMIC
NCDO2118_RS00950	17.4198	methionine sulfoxide reductase B	O	Posttranslational modification, protein turnover, chaperones	CYTOPLASMIC
NCDO2118_RS00255	11.5331	peroxiredoxin	O	Posttranslational modification, protein turnover, chaperones	CYTOPLASMIC
NCDO2118_RS02830	33.8607	RNA pyrophosphohydrolase	LR	Replication, recombination and repair	CYTOPLASMIC
NCDO2118_RS09950	41.4513	pyruvate formate lyase-activating protein	L	Replication, recombination and repair	CYTOPLASMIC
NCDO2118_RS09835	18.9415	cysteine desulfurase	L	Replication, recombination and repair	CYTOPLASMIC
NCDO2118_RS08980	26.1664	Unknown Function	L	Replication, recombination and repair	PSE
NCDO2118_RS02550	45.6651	DNA polymerase III subunit epsilon	L	Replication, recombination and repair	CYTOPLASMIC
NCDO2118_RS11860	32.2527	ECF-type sigma factor negative effector	L	Replication, recombination and repair	PSE
NCDO2118_RS08645	38.3551	Unknown Function	L	Replication, recombination and repair	CYTOPLASMIC
NCDO2118_RS04600	31.0753	restriction endonuclease subunit S	L	Replication, recombination and repair	CYTOPLASMIC
NCDO2118_RS12215	17.4989	DNA mismatch repair protein MutL	L	Replication, recombination and repair	CYTOPLASMIC
NCDO2118_RS12010	39.7991	DNA polymerase III subunit gamma/tau	L	Replication, recombination and repair	CYTOPLASMIC
NCDO2118_RS12015	10.3139	aminoglycoside phosphotransferase	L	Replication, recombination and repair	CYTOPLASMIC
NCDO2118_RS10435	15.4274	membrane protein	QR	Secondary metabolites biosynthesis, transport and catabolism	MEMBRANE
NCDO2118_RS07655	21.1122	methylase	QR	Secondary metabolites biosynthesis, transport and catabolism	CYTOPLASMIC
NCDO2118_RS06100	73.5642	cold-shock protein	K	Transcription	CYTOPLASMIC
NCDO2118_RS03455	52.88	RpiR family transcriptional regulator	K	Transcription	CYTOPLASMIC
NCDO2118_RS09290	23.723	transcriptional regulator	K	Transcription	CYTOPLASMIC
NCDO2118_RS09745	32.4427	ABC transporter permease	K	Transcription	PSE
NCDO2118_RS08245	24.5121	transcription antiterminator BglG	K	Transcription	CYTOPLASMIC
NCDO2118_RS02370	14.2994	RpiR family transcriptional regulator	K	Transcription	CYTOPLASMIC
NCDO2118_RS07915	38.0779	cupin	K	Transcription	CYTOPLASMIC
NCDO2118_RS09560	125.897	DeoR family transcriptional regulator	K	Transcription	CYTOPLASMIC
NCDO2118_RS06865	19.3478	XRE family transcriptional regulator	K	Transcription	CYTOPLASMIC
NCDO2118_RS09270	15.2339	Unknown Function	K	Transcription	MEMBRANE
NCDO2118_RS08790	16.256	Unknown Function	K	Transcription	CYTOPLASMIC
NCDO2118_RS07830	22.8853	GntR family transcriptional regulator	K	Transcription	CYTOPLASMIC
NCDO2118_RS04155	15.3364	acetyltransferase	J	Translation, ribosomal structure and biogenesis	CYTOPLASMIC
NCDO2118_RS06450	25.5251	regulator	J	Translation, ribosomal structure and biogenesis	CYTOPLASMIC
NCDO2118_RS05975	23.9726	RNA methyltransferase	J	Translation, ribosomal structure and biogenesis	CYTOPLASMIC
NCDO2118_RS04570	162.173	50S ribosomal protein L19	J	Translation, ribosomal structure and biogenesis	CYTOPLASMIC

## Sheet: Table S.4
Table S.4: Exclusive proteome of NAE condition
Accession	Description	Score	COG Symbol	Biological Process	SurfG
NCDO2118_RS08430	nitrogen regulatory protein P-II	21.6268	E	Amino acid transport and metabolism	CYTOPLASMIC
NCDO2118_RS02040	peptide ABC transporter permease	11.1944	EP	Amino acid transport and metabolism	MEMBRANE
NCDO2118_RS02050	peptide ABC transporter ATP-binding protein	16.5413	EP	Amino acid transport and metabolism	CYTOPLASMIC
NCDO2118_RS10635	homoserine O-succinyltransferase	17.7852	E	Amino acid transport and metabolism	CYTOPLASMIC
NCDO2118_RS09585	prephenate dehydratase	25.6952	E	Amino acid transport and metabolism	CYTOPLASMIC
NCDO2118_RS09660	shikimate 5-dehydrogenase	31.4025	E	Amino acid transport and metabolism	PSE
NCDO2118_RS10625	cysteine desulfhydrase	117.775	E	Amino acid transport and metabolism	CYTOPLASMIC
NCDO2118_RS08705	prephenate dehydrogenase	22.0327	E	Amino acid transport and metabolism	CYTOPLASMIC
NCDO2118_RS00575	argininosuccinate synthase	21.6079	E	Amino acid transport and metabolism	CYTOPLASMIC
NCDO2118_RS09490	Lipase/acylhydrolase	11.5799	E	Amino acid transport and metabolism	CYTOPLASMIC
NCDO2118_RS06830	glutamate synthase	29.8584	ER	Amino acid transport and metabolism	CYTOPLASMIC
NCDO2118_RS06065	spermidine/putrescine ABC transporter substrate-binding protein	15.6387	E	Amino acid transport and metabolism	SECRETED
NCDO2118_RS02075	asparagine synthase	90.9327	E	Amino acid transport and metabolism	CYTOPLASMIC
NCDO2118_RS02045	peptide ABC transporter permease	11.8213	EP	Amino acid transport and metabolism	MEMBRANE
NCDO2118_RS01295	fructose 1,6-bisphosphatase	41.7948	G	Carbohydrate transport and metabolism	CYTOPLASMIC
NCDO2118_RS12520	sugar transporter	10.6189	G	Carbohydrate transport and metabolism	MEMBRANE
NCDO2118_RS12330	transporter	24.3637	GEPR	Carbohydrate transport and metabolism	MEMBRANE
NCDO2118_RS03500	PTS beta-glucoside transporter subunit IIABC	10.6572	G	Carbohydrate transport and metabolism	MEMBRANE
NCDO2118_RS04795	sugar ABC transporter ATP-binding protein	64.0375	GM	Carbohydrate transport and metabolism	PSE
NCDO2118_RS02440	PTS beta-glucoside transporter subunit IIABC	19.5458	G	Carbohydrate transport and metabolism	MEMBRANE
NCDO2118_RS08250	PTS fructose transporter subunit IIA	11.0918	GT	Carbohydrate transport and metabolism	CYTOPLASMIC
NCDO2118_RS10220	tRNA uridine 5-carboxymethylaminomethyl modification protein	59.9929	D	Cell cycle control, cell division, chromosome partitioning	CYTOPLASMIC
NCDO2118_RS03350	cell division protein FtsW	25.5542	D	Cell cycle control, cell division, chromosome partitioning	MEMBRANE
NCDO2118_RS11620	competence protein	26.0797	NU	Cell motility	PSE
NCDO2118_RS11895	fibronectin-binding protein	31.1852	M	Cell wall/membrane/envelope biogenesis	CYTOPLASMIC
NCDO2118_RS00715	family 2 glycosyltransferase	18.613	M	Cell wall/membrane/envelope biogenesis	CYTOPLASMIC
NCDO2118_RS00720	polysaccharide biosynthesis protein	21.723	M	Cell wall/membrane/envelope biogenesis	CYTOPLASMIC
NCDO2118_RS03835	racemase	9.891	MR	Cell wall/membrane/envelope biogenesis	CYTOPLASMIC
NCDO2118_RS04835	UDP-galactopuranose mutase	12.9575	M	Cell wall/membrane/envelope biogenesis	CYTOPLASMIC
NCDO2118_RS07060	cell surface protein	63.011	M	Cell wall/membrane/envelope biogenesis	PSE
NCDO2118_RS04825	family 2 glycosyltransferase	17.3956	M	Cell wall/membrane/envelope biogenesis	CYTOPLASMIC
NCDO2118_RS12515	D-alanyl-D-alanine carboxypeptidase	17.2713	M	Cell wall/membrane/envelope biogenesis	SECRETED
NCDO2118_RS00680	polysaccharide biosynthesis protein	10.9655	M	Cell wall/membrane/envelope biogenesis	MEMBRANE
NCDO2118_RS04485	farnesyl-diphosphate synthase	29.549	H	Coenzyme transport and metabolism	CYTOPLASMIC
NCDO2118_RS07135	2-dehydropantoate 2-reductase	10.6009	H	Coenzyme transport and metabolism	CYTOPLASMIC
NCDO2118_RS03335	dephospho-CoA kinase	24.3597	H	Coenzyme transport and metabolism	CYTOPLASMIC
NCDO2118_RS00920	geranylgeranyl pyrophosphate synthase	36.812	H	Coenzyme transport and metabolism	CYTOPLASMIC
NCDO2118_RS01285	ABC transporter permease	15.087	V	Defense mechanisms	PSE
NCDO2118_RS01850	multidrug ABC transporter permease	105.626	V	Defense mechanisms	PSE
NCDO2118_RS03740	Unknown Function	26.7589	CH	Energy production and conversion	CYTOPLASMIC
NCDO2118_RS09725	F0F1 ATP synthase subunit C	11.166	C	Energy production and conversion	MEMBRANE
NCDO2118_RS04305	NADH dehydrogenase	29.0871	C	Energy production and conversion	CYTOPLASMIC
NCDO2118_RS03715	cytochrome D ubiquinol oxidase subunit I	17.5752	C	Energy production and conversion	MEMBRANE
NCDO2118_RS09720	F0F1 ATP synthase subunit A	9.6694	C	Energy production and conversion	MEMBRANE
NCDO2118_RS04345	galactose-1-phosphate uridylyltransferase	15.8387	C	Energy production and conversion	CYTOPLASMIC
NCDO2118_RS10255	Unknown Function	11.1184	S	Function unknown	CYTOPLASMIC
NCDO2118_RS02115	adenylate cyclase	39.4366	S	Function unknown	CYTOPLASMIC
NCDO2118_RS07095	Unknown Function	62.1612	S	Function unknown	CYTOPLASMIC
NCDO2118_RS03955	Unknown Function	26.4277	S	Function unknown	CYTOPLASMIC
NCDO2118_RS08720	Unknown Function	15.5997	S	Function unknown	CYTOPLASMIC
NCDO2118_RS05695	Xaa-Pro dipeptidase	24.0808	S	Function unknown	CYTOPLASMIC
NCDO2118_RS11905	Unknown Function	14.2487	S	Function unknown	CYTOPLASMIC
NCDO2118_RS01545	Unknown Function	44.1281	S	Function unknown	CYTOPLASMIC
NCDO2118_RS08735	Unknown Function	22.3764	S	Function unknown	CYTOPLASMIC
NCDO2118_RS12090	Unknown Function	12.4668	S	Function unknown	CYTOPLASMIC
NCDO2118_RS06040	Unknown Function	15.9658	S	Function unknown	MEMBRANE
NCDO2118_RS05380	Unknown Function	14.0024	S	Function unknown	PSE
NCDO2118_RS00760	Unknown Function	12.9714	S	Function unknown	MEMBRANE
NCDO2118_RS10740	Unknown Function	38.6864	S	Function unknown	PSE
NCDO2118_RS08840	histidine kinase	8.1351	S	Function unknown	CYTOPLASMIC
NCDO2118_RS05740	Unknown Function	14.2105	S	Function unknown	CYTOPLASMIC
NCDO2118_RS09520	Unknown Function	16.0513	S	Function unknown	MEMBRANE
NCDO2118_RS11300	Unknown Function	10.9019	S	Function unknown	MEMBRANE
NCDO2118_RS03540	Unknown Function	65.1892	S	Function unknown	SECRETED
NCDO2118_RS10465	Unknown Function	13.8909	S	Function unknown	CYTOPLASMIC
NCDO2118_RS03600	Unknown Function	61.6909	S	Function unknown	CYTOPLASMIC
NCDO2118_RS04675	Unknown Function	11.5011	S	Function unknown	PSE
NCDO2118_RS04515	transporter	11.2771	S	Function unknown	MEMBRANE
NCDO2118_RS03475	Unknown Function	28.0514	S	Function unknown	PSE
NCDO2118_RS00725	Unknown Function	12.7894	S	Function unknown	CYTOPLASMIC
NCDO2118_RS00365	Unknown Function	14.119	S	Function unknown	CYTOPLASMIC
NCDO2118_RS06740	Unknown Function	21.8441	S	Function unknown	CYTOPLASMIC
NCDO2118_RS05075	Unknown Function	21.0234	S	Function unknown	CYTOPLASMIC
NCDO2118_RS05360	sporulation protein	17.5846	S	Function unknown	CYTOPLASMIC
NCDO2118_RS08715	Unknown Function	9.0587	S	Function unknown	CYTOPLASMIC
NCDO2118_RS10390	Unknown Function	17.1783	S	Function unknown	MEMBRANE
NCDO2118_RS01720	protein SprT-like	35.9014	S	Function unknown	CYTOPLASMIC
NCDO2118_RS08180	fatty acid-binding protein DegV	12.1415	S	Function unknown	CYTOPLASMIC
NCDO2118_RS02350	membrane protein	11.4909	S	Function unknown	MEMBRANE
NCDO2118_RS05205	Unknown Function	28.4852	S	Function unknown	CYTOPLASMIC
NCDO2118_RS03255	oxidoreductase	16.3437	R	General function prediction only	CYTOPLASMIC
NCDO2118_RS10215	hydrolase	26.603	R	General function prediction only	CYTOPLASMIC
NCDO2118_RS11340	GHMP kinase	21.5574	R	General function prediction only	CYTOPLASMIC
NCDO2118_RS06470	tyrosine recombinase XerS	27.9782	R	General function prediction only	CYTOPLASMIC
NCDO2118_RS07945	hydrolase	9.3169	R	General function prediction only	CYTOPLASMIC
NCDO2118_RS06385	sulfurtransferase	21.3338	R	General function prediction only	CYTOPLASMIC
NCDO2118_RS12315	NUDIX hydrolase	10.1876	R	General function prediction only	CYTOPLASMIC
NCDO2118_RS06635	trans-acting positive regulator	42.6372	R	General function prediction only	CYTOPLASMIC
NCDO2118_RS01305	Unknown Function	19.3634	R	General function prediction only	CYTOPLASMIC
NCDO2118_RS05455	GNAT family acetyltransferase	31.214	R	General function prediction only	CYTOPLASMIC
NCDO2118_RS11970	transcriptional regulator	17.1893	R	General function prediction only	PSE
NCDO2118_RS04920	antirepressor	33.4644	R	General function prediction only	CYTOPLASMIC
NCDO2118_RS05885	N-acetylmuramic acid 6-phosphate etherase	55.931	R	General function prediction only	CYTOPLASMIC
NCDO2118_RS01315	Unknown Function	15.3907	R	General function prediction only	CYTOPLASMIC
NCDO2118_RS06190	PKS biosynthesis protein	22.5727	R	General function prediction only	CYTOPLASMIC
NCDO2118_RS11870	Fe-S-oxidoreductase	10.4591	R	General function prediction only	CYTOPLASMIC
NCDO2118_RS10875	alpha/beta hydrolase	20.514	R	General function prediction only	SECRETED
NCDO2118_RS03385	arsenate reductase	25.401	P	Inorganic ion transport and metabolism	CYTOPLASMIC
NCDO2118_RS01675	ABC transporter permease	30.592	P	Inorganic ion transport and metabolism	MEMBRANE
NCDO2118_RS01910	Unknown Function	59.3352	P	Inorganic ion transport and metabolism	SECRETED
NCDO2118_RS11320	metal transporter	29.5156	P	Inorganic ion transport and metabolism	CYTOPLASMIC
NCDO2118_RS08825	cation transporter	11.9361	P	Inorganic ion transport and metabolism	MEMBRANE
NCDO2118_RS06645	sodium:hydrogen antiporter	22.9451	P	Inorganic ion transport and metabolism	PSE
NCDO2118_RS03325	dihydroorotate dehydrogenase	10.0673	P	Inorganic ion transport and metabolism	PSE
NCDO2118_RS11545	preprotein translocase subunit SecE	14.1913	U	Intracellular trafficking, secretion, and vesicular transport	MEMBRANE
NCDO2118_RS04960	Unknown Function	46.0823	X	Mobilome: prophages, transposons	CYTOPLASMIC
NCDO2118_RS04935	antirepressor	30.5924	X	Mobilome: prophages, transposons	CYTOPLASMIC
NCDO2118_RS08020	phosphoribosylformylglycinamidine synthase	28.4529	F	Nucleotide transport and metabolism	CYTOPLASMIC
NCDO2118_RS00815	NUDIX hydrolase	22.1452	F	Nucleotide transport and metabolism	CYTOPLASMIC
NCDO2118_RS07920	phosphoribosylaminoimidazole carboxylase	61.4964	F	Nucleotide transport and metabolism	CYTOPLASMIC
NCDO2118_RS08025	phosphoribosylaminoimidazole-succinocarboxamide synthase	44.4766	F	Nucleotide transport and metabolism	CYTOPLASMIC
NCDO2118_RS08805	uracil permease	17.9714	F	Nucleotide transport and metabolism	MEMBRANE
NCDO2118_RS06025	deoxynucleoside kinase	11.8208	F	Nucleotide transport and metabolism	CYTOPLASMIC
NCDO2118_RS00550	orotidine 5'-phosphate decarboxylase	35.6486	F	Nucleotide transport and metabolism	CYTOPLASMIC
NCDO2118_RS02535	nucleoside deoxyribosyltransferase	17.5006	F	Nucleotide transport and metabolism	CYTOPLASMIC
NCDO2118_RS07950	purine biosynthesis protein purH	140.862	F	Nucleotide transport and metabolism	CYTOPLASMIC
NCDO2118_RS05965	xanthine/uracil permease	9.385	F	Nucleotide transport and metabolism	MEMBRANE
NCDO2118_RS07980	phosphoribosylaminoimidazole synthetase	41.525	F	Nucleotide transport and metabolism	CYTOPLASMIC
NCDO2118_RS01760	tRNA N6-adenosine threonylcarbamoyltransferase	10.5583	O	Posttranslational modification, protein turnover, chaperones	CYTOPLASMIC
NCDO2118_RS0679	segregation and condensation protein A	10.0323	L	Replication, recombination and repair	CYTOPLASMIC
NCDO2118_RS04955	Unknown Function	34.605	L	Replication, recombination and repair	CYTOPLASMIC
NCDO2118_RS10640	DNA mismatch repair protein MutT	10.1526	LR	Replication, recombination and repair	CYTOPLASMIC
NCDO2118_RS02255	single-stranded DNA-binding protein	30.2792	L	Replication, recombination and repair	CYTOPLASMIC
NCDO2118_RS05595	DNA replication protein DnaD	22.1684	L	Replication, recombination and repair	CYTOPLASMIC
NCDO2118_RS03640	TatD family hydrolase	9.2866	L	Replication, recombination and repair	CYTOPLASMIC
NCDO2118_RS05260	isochorismatase	20.0499	Q	Secondary metabolites biosynthesis, transport and catabolism	CYTOPLASMIC
NCDO2118_RS04680	histidine kinase	9.5447	T	Signal transduction mechanisms	MEMBRANE
NCDO2118_RS07010	MarR family transcriptional regulator	24.4888	K	Transcription	CYTOPLASMIC
NCDO2118_RS05920	chromosome partitioning protein ParB	38.2015	K	Transcription	CYTOPLASMIC
NCDO2118_RS01460	XRE family transcriptional regulator	10.2647	K	Transcription	CYTOPLASMIC
NCDO2118_RS04150	DeoR family transcriptional regulator	10.2603	KG	Transcription	CYTOPLASMIC
NCDO2118_RS09005	ribose operon repressor	16.8382	K	Transcription	CYTOPLASMIC
NCDO2118_RS08745	antirepressor	71.2049	K	Transcription	CYTOPLASMIC
NCDO2118_RS11205	helicase	8.0351	KL	Transcription	CYTOPLASMIC
NCDO2118_RS03445	fructokinase	22.9939	KG	Transcription	CYTOPLASMIC
NCDO2118_RS06505	MarR family transcriptional regulator	28.8277	K	Transcription	CYTOPLASMIC
NCDO2118_RS01865	transcriptional regulator	16.0508	K	Transcription	CYTOPLASMIC
NCDO2118_RS04560	LysR family transcriptional regulator	17.7056	K	Transcription	CYTOPLASMIC
NCDO2118_RS09160	XRE family transcriptional regulator	24.6757	K	Transcription	CYTOPLASMIC
NCDO2118_RS03020	GNAT family acetyltransferase	10.4762	KR	Transcription	CYTOPLASMIC
NCDO2118_RS06500	acetyltransferase	23.6541	KR	Transcription	CYTOPLASMIC
NCDO2118_RS08355	S-adenosylmethionine tRNA ribosyltransferase	25.9742	J	Translation, ribosomal structure and biogenesis	CYTOPLASMIC
NCDO2118_RS04570	50S ribosomal protein L19	155.272	J	Translation, ribosomal structure and biogenesis	CYTOPLASMIC
NCDO2118_RS10695	phenylalanine--tRNA ligase subunit alpha	82.9999	J	Translation, ribosomal structure and biogenesis	CYTOPLASMIC
NCDO2118_RS01195	30S ribosomal protein S21	29.3626	J	Translation, ribosomal structure and biogenesis	CYTOPLASMIC
NCDO2118_RS03220	tRNA delta(2)-isopentenylpyrophosphate transferase	26.1751	J	Translation, ribosomal structure and biogenesis	CYTOPLASMIC
NCDO2118_RS04700	general stress protein	17.2453	J	Translation, ribosomal structure and biogenesis	CYTOPLASMIC
NCDO2118_RS00825	amidase	26.2791	J	Translation, ribosomal structure and biogenesis	CYTOPLASMIC
NCDO2118_RS00595	ribonuclease P	27.1212	J	Translation, ribosomal structure and biogenesis	CYTOPLASMIC

## Sheet: Table.5 
Table S.5: Proteins differentially expressed between the 37 °C (AN) and 30 °C (AN) conditions.
Accession	Description	Score	Anova (p)	Log(2)Ratio	COG Symbol	Biological Process	COG Group
NCDO2118_RS07555	hypothetical protein	11.7771	0.0154971	4.19391	S	Function unknown	Poorly characterized
NCDO2118_RS02455	sugar hydrolase	9.6381	0.010916	3.22508	R	General function prediction only	Poorly characterized
NCDO2118_RS04350	tRNA-specific 2-thiouridylase MnmA	38.4663	0.0430853	3.21775	J	Translation, ribosomal structure and biogenesis	Information storage and processing
NCDO2118_RS10430	transcriptional regulator	174.37	0.05157	2.96382	S	Function unknown	Poorly characterized
NCDO2118_RS05860	hypothetical protein	59.1006	0.0490253	2.90358	S	Function unknown	Poorly characterized
NCDO2118_RS10850	protease	52.4254	0.0430867	2.66318	R	General function prediction only	Poorly characterized
NCDO2118_RS01805	thiol peroxidase	81.4672	0.0078699	2.43342	O	Posttranslational modification, protein turnover, chaperones	Cellular processes and sinaling
NCDO2118_RS07325	23S rRNA pseudouridylate synthase	49.2295	0.0377052	2.34285	J	Translation, ribosomal structure and biogenesis	Information storage and processing
NCDO2118_RS01780	phosphonate ABC transporter substrate-binding protein	33.7305	0.0227549	2.30873	P	Inorganic ion transport and metabolism	Metabolism
NCDO2118_RS11125	ferritin	285.099	0.0436014	2.27571	P	Inorganic ion transport and metabolism	Metabolism
NCDO2118_RS07380	hypothetical protein	117.624	0.0526573	2.12268	T	Signal transduction mechanisms	Cellular processes and sinaling
NCDO2118_RS06370	imidazole glycerol phosphate synthase	18.5329	0.00991736	2.1036	E	Amino acid transport and metabolism	Metabolism
NCDO2118_RS09195	transcriptional regulator	76.2806	0.048315	2.01434	K	Transcription	Information storage and processing
NCDO2118_RS10985	histidine triad protein	61.6149	0.0233845	1.96849	FGR	Nucleotide transport and metabolism	Metabolism
NCDO2118_RS01115	GTP-binding protein	79.2442	0.0448445	1.84841	R	General function prediction only	Poorly characterized
NCDO2118_RS11705	glycosyltransferase	32.9688	0.0464159	1.84731	M	Cell wall/membrane/envelope biogenesis	Cellular processes and sinaling
NCDO2118_RS07635	anthranilate synthase component I	10.1186	0.0068614	1.83945	EH	Amino acid transport and metabolism	Metabolism
NCDO2118_RS10325	cell division protein	93.0974	0.0210868	1.72111	R	General function prediction only	Poorly characterized
NCDO2118_RS10270	ribose-phosphate pyrophosphokinase	156.27	0.0511294	1.68875	FE	Nucleotide transport and metabolism	Metabolism
NCDO2118_RS05425	protein NrdI	17.2772	0.00263987	1.66287	F	Nucleotide transport and metabolism	Metabolism
NCDO2118_RS09890	transcriptional regulator	9.5265	0.0541181	1.6094	S	Function unknown	Poorly characterized
NCDO2118_RS11555	acyltransferase	36.9656	0.042422	1.58843	I	Lipid transport and metabolism	Metabolism
NCDO2118_RS02335	superoxide dismutase [Mn]	99.0618	0.00567031	1.52403	O	Posttranslational modification, protein turnover, chaperones	Cellular processes and sinaling
NCDO2118_RS10485	ribonuclease Y	148.406	0.0342734	1.46457	R	General function prediction only	Poorly characterized
NCDO2118_RS05245	thioredoxin reductase	57.9131	0.053613	1.35457	O	Posttranslational modification, protein turnover, chaperones	Cellular processes and sinaling
NCDO2118_RS09675	glutamine ABC transporter ATP-binding protein	138.964	0.0475088	1.28979	E	Amino acid transport and metabolism	Metabolism
NCDO2118_RS06015	DHNTP pyrophosphohydrolase	20.5305	0.0407707	1.28477	LR	Replication, recombination and repair	Information storage and processing
NCDO2118_RS05310	protein GrpE	162.535	0.0103989	1.27993	O	Posttranslational modification, protein turnover, chaperones	Cellular processes and sinaling
NCDO2118_RS10905	aldose 1-epimerase	336.681	0.0350885	1.24287	G	Carbohydrate transport and metabolism	Metabolism
NCDO2118_RS08900	aspartate-semialdehyde dehydrogenase	79.5406	0.0336585	1.21599	E	Amino acid transport and metabolism	Metabolism
NCDO2118_RS06115	N-acetylmannosamine-6-phosphate 2-epimerase	81.8451	0.0184839	1.16406	G	Carbohydrate transport and metabolism	Metabolism
NCDO2118_RS03300	enolase	479.733	0.0511604	1.06921	G	Carbohydrate transport and metabolism	Metabolism
NCDO2118_RS11065	DNA methyltransferase	103.078	0.0242382	1.05446	L	Replication, recombination and repair	Information storage and processing
NCDO2118_RS02830	RNA pyrophosphohydrolase	33.8607	0.0436508	0.947086	LR	Replication, recombination and repair	Information storage and processing
NCDO2118_RS00300	O-acetylhomoserine aminocarboxypropyltransferase	31.9631	0.0107504	0.839916	E	Amino acid transport and metabolism	Metabolism
NCDO2118_RS09945	pyrophosphatase	116.189	0.0465828	0.774422	C	Energy production and conversion	Metabolism
NCDO2118_RS08830	gamma-glutamyl phosphate reductase 1	150.372	0.0402041	0.697395	E	Amino acid transport and metabolism	Metabolism
NCDO2118_RS02200	FMN-dependent NADH-azoreductase 2	54.9903	0.0217716	0.676757	I	Lipid transport and metabolism	Metabolism
NCDO2118_RS04695	peptidyl-prolyl cis-trans isomerase	85.5824	0.0397522	0.639236	O	Posttranslational modification, protein turnover, chaperones	Cellular processes and sinaling
NCDO2118_RS02825	peptide deformylase	179.536	0.02706	0.614887	J	Translation, ribosomal structure and biogenesis	Information storage and processing
NCDO2118_RS06780	pseudouridine synthase	114.341	0.0019157	-0.360009	J	Translation, ribosomal structure and biogenesis	Information storage and processing
NCDO2118_RS01685	2,3,4,5-tetrahydropyridine-2,6-dicarboxylate N-acetyltransferase	45.4718	0.0295013	-0.449188	E	Amino acid transport and metabolism	Metabolism
NCDO2118_RS11490	50S ribosomal protein L22	106.71	0.0471764	-0.612228	J	Translation, ribosomal structure and biogenesis	Information storage and processing
NCDO2118_RS10885	beta-D-galactosidase	455.064	0.0434415	-0.965377	G	Carbohydrate transport and metabolism	Metabolism
NCDO2118_RS09065	RNA methyltransferase	74.4735	0.0513667	-1.15409	L	Replication, recombination and repair	Information storage and processing
NCDO2118_RS03665	elongation factor P	28.4103	0.0416744	-1.38772	J	Translation, ribosomal structure and biogenesis	Information storage and processing
NCDO2118_RS07585	6-phospho-beta-glucosidase	114.661	0.0360163	-1.49086	G	Carbohydrate transport and metabolism	Metabolism
NCDO2118_RS08185	transposase	56.0169	0.00977011	-1.61872	X	Mobilome: prophages, transposons	Cellular processes and sinaling
NCDO2118_RS12380	alkylphosphonate transporter	13.9519	0.0195216	-2.32814	P	Inorganic ion transport and metabolism	Metabolism
NCDO2118_RS09670	amino acid ABC transporter permease	392.995	0.0494363	-2.50534	ET	Amino acid transport and metabolism	Metabolism
NCDO2118_RS02065	RNA helicase	259.254	0.0492447	-2.98682	LKJ	Replication, recombination and repair	Information storage and processing
NCDO2118_RS02360	PTS sugar transporter	125.365	0.0544336	-3.20923	G	Carbohydrate transport and metabolism	Metabolism
NCDO2118_RS00805	glutamyl-tRNA(Gln) amidotransferase subunit C	128.439	0.0534954	-3.34454	J	Translation, ribosomal structure and biogenesis	Information storage and processing
NCDO2118_RS06535	sugar ABC transporter ATP-binding protein	31.7888	0.0307048	-3.60679	R	General function prediction only	Poorly characterized
NCDO2118_RS12240	hypothetical protein	10.6044	0.0184867	-4.00465	S	Function unknown	Poorly characterized
NCDO2118_RS02035	ABC transporter substrate-binding protein	320.098	0.0174925	-4.50625	E	Amino acid transport and metabolism	Metabolism
NCDO2118_RS05750	GCN5 family acetyltransferase	53.4075	0.0481775	-4.61191	KR	Transcription	Information storage and processing
NCDO2118_RS12040	hypothetical protein	16.2168	0.044291	-4.83982	S	Function unknown	Poorly characterized
NCDO2118_RS09450	PhoU family transcriptional regulator	116.479	0.0389729	-5.13825	K	Transcription	Metabolism
NCDO2118_RS06100	cold-shock protein	73.5642	0.026303	-6.06172	K	Transcription	Information storage and processing
NCDO2118_RS04175	3-ketoacyl-ACP reductase	41.0233	0.0352874	-8.09041	IQR	Lipid transport and metabolism	Metabolism

## Sheet: Table S.6
Table S.6: Exclusive proteins detected in 37 °C (AN) and 30 °C (AN) conditions.
Accession	Description	Score	Condition	COG Symbol	Biological Process
NCDO2118_RS08175	dihydrodipicolinate reductase	8.7816	30 °C	E	Amino acid transport and metabolism
NCDO2118_RS04805	glycosyl transferase family 2	14.4903	30 °C	M	Cell wall/membrane/envelope biogenesis
NCDO2118_RS04790	exopolysaccharide biosynthesis protein	10.256	30 °C	M	Cell wall/membrane/envelope biogenesis
NCDO2118_RS06410	3-isopropylmalate dehydratase small subunit	19.665	37 °C	E	Amino acid transport and metabolism
NCDO2118_RS00395	polysaccharide deacetylase	11.6691	37 °C	G	Carbohydrate transport and metabolism
NCDO2118_RS08995	ribose pyranase	29.728	37 °C	G	Carbohydrate transport and metabolism
NCDO2118_RS03685	glucose-1-phosphate adenylyltransferase	29.2416	37 °C	G	Carbohydrate transport and metabolism
NCDO2118_RS00405	Glucosyl transferase family 2	10.7645	37 °C	M	Cell wall/membrane/envelope biogenesis
NCDO2118_RS01465	UDP-N-acetylglucosamine 2-epimerase	10.8237	37 °C	M	Cell wall/membrane/envelope biogenesis
NCDO2118_RS07435	1,4-beta-N-acetylmuramidase	18.7791	37 °C	M	Cell wall/membrane/envelope biogenesis
NCDO2118_RS02495	phosphomethylpyrimidine kinase	15.7638	37 °C	H	Coenzyme transport and metabolism
NCDO2118_RS05735	nicotinic acid mononucleotide adenylyltransferase	23.5598	37 °C	H	Coenzyme transport and metabolism
NCDO2118_RS03860	isochorismate synthase	19.6238	37 °C	H	Coenzyme transport and metabolism
NCDO2118_RS11260	dihydrolipoamide dehydrogenase	14.4307	37 °C	C	Energy production and conversion
NCDO2118_RS03825	Unknown Function	12.999	37 °C	S	Function unknown
NCDO2118_RS06250	Unknown Function	27.9794	37 °C	S	Function unknown
NCDO2118_RS03170	Unknown Function	14.9039	37 °C	S	Function unknown
NCDO2118_RS00530	Unknown Function	14.3311	37 °C	S	Function unknown
NCDO2118_RS08320	Unknown Function	9.677	37 °C	S	Function unknown
NCDO2118_RS04565	GTP diphosphokinase	48.0823	37 °C	S	Function unknown
NCDO2118_RS12100	Unknown Function	14.0514	37 °C	S	Function unknown
NCDO2118_RS04655	glyoxalase	12.4822	37 °C	R	General function prediction only
NCDO2118_RS01690	acetyldiaminopimelate deacetylase	16.1133	37 °C	R	General function prediction only
NCDO2118_RS06805	metallophosphoesterase	17.6236	37 °C	R	General function prediction only
NCDO2118_RS06145	Unknown Function	11.4363	37 °C	R	General function prediction only
NCDO2118_RS03850	Unknown Function	38.8385	37 °C	R	General function prediction only
NCDO2118_RS10415	serine/threonine protein kinase	14.601	37 °C	R	General function prediction only
NCDO2118_RS05140	tail protein	21.4819	37 °C	X	Mobilome: prophages, transposons
NCDO2118_RS02990	thymidine kinase	15.7584	37 °C	F	Nucleotide transport and metabolism
NCDO2118_RS02110	dithiol-disulfide isomerase	9.6791	37 °C	O	Posttranslational modification, protein turnover, chaperones
NCDO2118_RS00255	peroxiredoxin	11.5331	37 °C	O	Posttranslational modification, protein turnover, chaperones
NCDO2118_RS00950	methionine sulfoxide reductase B	17.4198	37 °C	O	Posttranslational modification, protein turnover, chaperones
NCDO2118_RS11025	methionine sulfoxide reductase A	10.2347	37 °C	O	Posttranslational modification, protein turnover, chaperones
NCDO2118_RS08340	Replication protein RepB	18.9487	37 °C	L	Replication, recombination and repair
NCDO2118_RS10470	primosomal protein DnaI	21.1946	37 °C	L	Replication, recombination and repair
NCDO2118_RS11840	rRNA methyltransferase	27.4316	37 °C	L	Replication, recombination and repair
NCDO2118_RS02590	6-O-methylguanine-DNA methyltransferase	15.2976	37 °C	L	Replication, recombination and repair
NCDO2118_RS00015	ATP-dependent helicase	43.7499	37 °C	L	Replication, recombination and repair
NCDO2118_RS06795	tyrosine recombinase XerD	13.4736	37 °C	L	Replication, recombination and repair
NCDO2118_RS07655	methylase	21.1122	37 °C	Q	Secondary metabolites biosynthesis, transport and catabolism
NCDO2118_RS12525	SAM-dependent methyltransferase	10.8955	37 °C	Q	Secondary metabolites biosynthesis, transport and catabolism
NCDO2118_RS08790	Unknown Function	16.256	37 °C	K	Transcription
NCDO2118_RS07830	GntR family transcriptional regulator	22.8853	37 °C	K	Transcription
NCDO2118_RS09270	Unknown Function	15.2339	37 °C	K	Transcription
NCDO2118_RS01970	LysR family transcriptional regulator	19.0444	37 °C	K	Transcription
NCDO2118_RS09200	LacI family transcriptional regulator	30.2704	37 °C	K	Transcription
NCDO2118_RS06760	XRE family transcriptional regulator	18.6528	37 °C	K	Transcription
NCDO2118_RS10510	Unknown Function	11.8846	37 °C	K	Transcription
NCDO2118_RS12015	aminoglycoside phosphotransferase	10.3139	37 °C	J	Translation, ribosomal structure and biogenesis
NCDO2118_RS03015	release factor glutamine methyltransferase 5	15.0892	37 °C	J	Translation, ribosomal structure and biogenesis
COG Symbol = See, Figure X.

## Sheet: Table S.7
Table S.7: Proteins differentially expressed between the 37 °C (NAE) and 30 °C (NAE) conditions.
Accession	Description	Score	Anova (p)	Log(2)Ratio	COG Symbol	Biological Process	COG Group
NCDO2118_RS03360	citrate synthase 652804:654129 forward MW:50495	52.3871	0.0434831	7.06767	C	Energy production and conversion	Metabolism
NCDO2118_RS05070	hypothetical protein 1013841:1014026 forward MW:7252	13.7791	0.0458274	6.27691	S	Function unknown	Poorly characterized
NCDO2118_RS00230	pyruvate dehydrogenase E1 subunit alpha	159.47	0.0429867	5.83354	C	Energy production and conversion	Metabolism
NCDO2118_RS04120	hypothetical protein 824847:825086 forward MW:8549	116.716	0.041213	4.59029	S	Function unknown	Poorly characterized
NCDO2118_RS07095	hypothetical protein 1477701:1478561 reverse MW:33345	62.1612	0.0277687	3.80015	S	Function unknown	Poorly characterized
NCDO2118_RS12100	hypothetical protein	14.819	0.00251169	3.71921	S	Function unknown	Poorly characterized
NCDO2118_RS02260	molecular chaperone GroES	97.5363	0.00501155	3.29232	O	Posttranslational modification, protein turnover, chaperones	Cellular processes and sinaling
NCDO2118_RS03780	NADPH:quinone reductase 750449:751435 reverse MW:35912	70.9197	0.0239834	3.27153	CR	Energy production and conversion	Metabolism
NCDO2118_RS07805	ABC transporter substrate-binding protein	163.526	0.00860517	3.26161	G	Carbohydrate transport and metabolism	Metabolism
NCDO2118_RS10745	pyridoxamine 5'-phosphate oxidase	43.2031	0.00129888	3.1191	R	General function prediction only	Poorly characterized
NCDO2118_RS00855	acetyltransferase 167241:168293 forward MW:40658	21.1138	0.0439745	3.08625	R	General function prediction only	Poorly characterized
NCDO2118_RS02265	molecular chaperone GroEL	533.064	0.0144476	2.97267	O	Posttranslational modification, protein turnover, chaperones	Cellular processes and sinaling
NCDO2118_RS05215	formate--tetrahydrofolate ligase	189.17	0.0539829	2.94867	Q	Secondary metabolites biosynthesis, transport and catabolism	Metabolism
NCDO2118_RS01440	transcriptional regulator	147.057	0.00126439	2.90893	S	Function unknown	Poorly characterized
NCDO2118_RS04955	hypothetical protein	34.605	0.0196795	2.84156	L	Replication, recombination and repair	Information storage and processing
NCDO2118_RS11535	threonine synthase 2354113:2355603 reverse MW:55213	174.455	0.048969	2.78225	E	Amino acid transport and metabolism	Metabolism
NCDO2118_RS11920	RNA methyltransferase 2436770:2438311 reverse MW:58935	60.5767	0.0380972	2.73344	J	Translation, ribosomal structure and biogenesis	Information storage and processing
NCDO2118_RS05615	hypothetical protein	64.9452	0.0104001	2.64933	S	Function unknown	Poorly characterized
NCDO2118_RS07155	fibronectin-binding protein	228.287	0.00904414	2.53068	M	Cell wall/membrane/envelope biogenesis	Cellular processes and sinaling
NCDO2118_RS02955	hypothetical protein	32.2199	0.00085877	2.40938	S	Function unknown	Poorly characterized
NCDO2118_RS05285	phage tail protein	76.0735	0.00899046	2.39899	X	Mobilome: prophages, transposons	Cellular processes and sinaling
NCDO2118_RS00350	chromosome partitioning protein ParB	36.2799	0.00483313	2.38208	D	Cell cycle control, cell division, chromosome partitioning	Cellular processes and sinaling
NCDO2118_RS01365	Nicotinamidase 265877:266389 forward MW:18895	83.4833	0.0312199	2.34078	Q	Secondary metabolites biosynthesis, transport and catabolism	Metabolism
NCDO2118_RS09495	alanine--tRNA ligase 1963207:1965825 reverse MW:96345	697.229	0.0263494	2.31856	J	Translation, ribosomal structure and biogenesis	Information storage and processing
NCDO2118_RS01070	oligosaccharide glycerophosphotransferase	113.187	0.0116479	2.24141	M	Cell wall/membrane/envelope biogenesis	Cellular processes and sinaling
NCDO2118_RS11655	hypothetical protein 2377432:2377968 reverse MW:20730	32.6741	0.0494334	2.13936	S	Function unknown	Poorly characterized
NCDO2118_RS02575	hypothetical protein	15.6936	0.00859563	2.09617	S	Function unknown	Poorly characterized
NCDO2118_RS00370	heme ABC transporter ATP-binding protein	103.966	0.0411673	2.07613	P	Inorganic ion transport and metabolism	Poorly characterized
NCDO2118_RS00815	Phosphohydrolase, MutT/nudix family	22.1452	0.00571224	2.03428	L	Replication, recombination and repair	Metabolism
NCDO2118_RS11165	amino acid APC transporter	24.6954	0.0128897	2.02476	E	Amino acid transport and metabolism	Metabolism
NCDO2118_RS01260	dihydroxyacetone kinase subunit DhaM	54.9035	0.00624893	1.93384	T	Signal transduction mechanisms	Cellular processes and sinaling
NCDO2118_RS00430	acyl-phosphate glycerol 3-phosphate acyltransferase	112.926	0.0387835	1.82605	I	Lipid transport and metabolism	Metabolism
NCDO2118_RS04390	alanine racemase	104.779	0.00290615	1.7784	M	Cell wall/membrane/envelope biogenesis	Cellular processes and sinaling
NCDO2118_RS01860	seryl-tRNA synthetase 357866:358084 forward MW:8403	58.8072	0.0409654	1.73905	J	Translation, ribosomal structure and biogenesis	Information storage and processing
NCDO2118_RS10900	galactokinase	391.105	0.0196633	1.69465	G	Carbohydrate transport and metabolism	Metabolism
NCDO2118_RS11620	competence protein 2368171:2368587 reverse MW:15904	26.0797	0.0310555	1.66741	NU	Cell motility	Cellular processes and sinaling
NCDO2118_RS00715	family 2 glycosyltransferase 140036:140923 forward MW:35016	18.613	0.0332459	1.64521	M	Cell wall/membrane/envelope biogenesis	Cellular processes and sinaling
NCDO2118_RS10215	hydrolase 2110372:2111076 reverse MW:27947	26.603	0.0394424	1.57731	R	General function prediction only	Poorly characterized
NCDO2118_RS06015	DHNTP pyrophosphohydrolase 1202650:1203147 forward MW:19183	10.0674	0.0329727	1.56145	LR	Replication, recombination and repair	Information storage and processing
NCDO2118_RS07985	chaperone protein ClpB	380.827	0.00822327	1.55047	O	Posttranslational modification, protein turnover, chaperones	Cellular processes and sinaling
NCDO2118_RS01805	thiol peroxidase	72.9129	0.00160534	1.47683	O	Posttranslational modification, protein turnover, chaperones	Cellular processes and sinaling
NCDO2118_RS10660	RmuC family endonuclease	179.943	0.0121021	1.41672	L	Replication, recombination and repair	Information storage and processing
NCDO2118_RS04145	arsenate reductase 827837:828187 forward MW:13571	57.5618	0.0400507	1.37705	P	Inorganic ion transport and metabolism	Metabolism
NCDO2118_RS10890	maltose O-acetyltransferase	51.2183	0.017649	1.35382	R	General function prediction only	Poorly characterized
NCDO2118_RS02335	superoxide dismutase [Mn]	111.898	0.00185976	1.35338	O	Posttranslational modification, protein turnover, chaperones	Cellular processes and sinaling
NCDO2118_RS09460	phosphate import ATP-binding protein PstB 2	114.868	0.0148005	1.34885	P	Inorganic ion transport and metabolism	Metabolism
NCDO2118_RS01295	fructose 1,6-bisphosphatase 250649:252571 forward MW:73852	41.7948	0.0419363	1.34043	G	Carbohydrate transport and metabolism	Metabolism
NCDO2118_RS08720	hypothetical protein 1809495:1809668 reverse MW:6743	15.5997	0.0456307	1.32906	S	Function unknown	Poorly characterized
NCDO2118_RS02405	sugar ABC transporter ATP-binding protein	233.412	0.0107842	1.29786	G	Carbohydrate transport and metabolism	Metabolism
NCDO2118_RS11170	ornithine carbamoyltransferase 2292866:2293930 reverse MW:39456	308.021	0.0303444	1.23237	E	Amino acid transport and metabolism	Metabolism
NCDO2118_RS08355	S-adenosylmethionine tRNA ribosyltransferase	25.9742	0.0274127	1.21023	J	Translation, ribosomal structure and biogenesis	Information storage and processing
NCDO2118_RS03440	PTS sucrose transporter subunit IIABC	168.464	0.0163595	1.20571	G	Carbohydrate transport and metabolism	Metabolism
NCDO2118_RS05850	3-demethylubiquinone-9 3-methyltransferase	107.582	0.0416667	1.18353	S	Function unknown	Poorly characterized
NCDO2118_RS00735	exopolysaccharide biosynthesis protein	43.0227	0.0348736	1.11977	G	Carbohydrate transport and metabolism	Metabolism
NCDO2118_RS05920	chromosome partitioning protein ParB	38.2015	0.0417889	1.10241	D	Cell cycle control, cell division, chromosome partitioning	Cellular processes and sinaling
NCDO2118_RS01360	oxidoreductase	182.114	0.00723156	1.08706	R	General function prediction only	Poorly characterized
NCDO2118_RS12275	molecular chaperone DnaJ 2497427:2498566 reverse MW:40671	133.84	0.0333835	1.04119	O	Posttranslational modification, protein turnover, chaperones	Cellular processes and sinaling
NCDO2118_RS01735	ribonuclease J	179.897	0.0194461	1.02455	J	Translation, ribosomal structure and biogenesis	Information storage and processing
[truncated: 104 more rows]

## Sheet: Table S.8
Table S.8: Exclusive proteins detected in 37 °C (NAE) and 30 °C (NAE) conditions.
[truncated: 14 more rows]

## Sheet: Table S.9
Table S.9: Strain-specific proteins of NCDO 2118
[truncated: 7 more rows]
