# Supplementary material for: Quantitative Proteomic Analysis of the Response of Probiotic Putative Lactococcus lactis NCDO 2118 Strain to Different Oxygen Availability Under Temperature Variation
Source: Front Microbiol. 2019 Apr 11;10:759. doi: 10.3389/fmicb.2019.00759 (PMC6470185; doi:10.3389/fmicb.2019.00759)
Supplement: FILE S3 (TABLE 2) — Total list of peptide and proteins identified in AN condition. [file Table_2.xlsx]

## Sheet: Plan1
Table 2: Total list of peptide and proteins identified in AN condition.
protein.key	protein.Accession	protein.Description	protein.dataBaseType	protein.score	protein.falsePositiveRate	protein.avgMass	protein.MatchedProducts	protein.matchedPeptides	protein.digestPeps	protein.seqCover(%)	protein.MatchedPeptideIntenSum	protein.top3MatchedPeptideIntenSum	protein.MatchedProductIntenSum	protein.SumForTotalProteins	peptide.Rank	peptide.Pass	peptide.matchType	peptide.modification	peptide.mhp	peptide.seq	peptide.OriginatingSeq	peptide.seqStart	peptide.seqLength	peptide.pI	peptide.componentID	peptide.MatchedProducts	peptide.UniqueProducts	peptide.ConsectiveMatchedProducts	peptide.ComplementaryMatchedProducts	peptide.rawScore	peptide.score	peptide.(X)-P Bond	peptide.MatchedProductsSumInten	peptide.MatchedProductsTheoretical	peptide.MatchedProductsString	peptide.ModelRT	peptide.Volume	peptide.CSA	peptide.ModelDrift	peptide.RelIntensity	peptide.AutoCurate	precursor.leID	precursor.mhp	precursor.mhpCal	precursor.retT	precursor.inten	precursor.calcInten	precursor.charge	precursor.z
0	NCDO2118_RS00005	chromosomal replication initiator protein DnaA 575:1942 forward MW:51461	Regular	9594094	0	514610558	36	12	40	19.78	53883	26097	13989	1	1	Pass1	PepFrag1	None	10755742	GSQIVLTSDR	GSQIVLTSDR	246	10	7.00	1241	10	10	5	2	97939610	69730		5859	3.5	b3b4b5b6b10y1y3y4y5y5y6y7y8*y8y10	181084	993	120335139710428	803351397104284	0.2713	Green	4063	10755676	10755709	163254	14618	14618.00	1.92	2
0	NCDO2118_RS00005	chromosomal replication initiator protein DnaA 575:1942 forward MW:51461	Regular	9594094	0	514610558	36	12	40	19.78	53883	26097	13989	0	2	Pass1	PepFrag1	None	13406805	IPQELNNLEDR	IPQELNNLEDR	256	11	3.83	1243	10	10	5	1	297719900	74558	Identified	5483	3.2	b4b11y2y4y6y7y8y9y9y10y11	204699	1225	13841517091563	984151709156301	0.1951	Green	8849	13406762	13406792	201618	10512	10512.00	2.00	2
0	NCDO2118_RS00005	chromosomal replication initiator protein DnaA 575:1942 forward MW:51461	Regular	9594094	0	514610558	36	12	40	19.78	53883	26097	13989	0	3	Pass1	PepFrag1	None	14456114	NQMENFENTYR	NQMENFENTYR	202	11	4.26	1242	1	1	0	0	2250296	53342		166	1.3	b2*y2y8	188271	1261	141113866590153	101113866590153	0.0179	Yellow	7747	14456003	14456031	193233	967	967.00	2.00	2
0	NCDO2118_RS00005	chromosomal replication initiator protein DnaA 575:1942 forward MW:51461	Regular	9594094	0	514610558	36	12	40	19.78	53883	26097	13989	0	4	Pass2	PepFrag2	None	32745646	QAYDFFIEPAQLMSVEQDTANILLDSGMK	QAYDFFIEPAQLMSVEQDTANILLDSGMK	24	29	3.43	1248	2	2	1	0	1005779	49845	Identified	139	4.3	b8b9	411318	3026	252933051347924	12862203423195	0.1651	Yellow	19744	32745123	32745068	366120	8896	8896.00	2.96	3
0	NCDO2118_RS00005	chromosomal replication initiator protein DnaA 575:1942 forward MW:51461	Regular	9594094	0	514610558	36	12	40	19.78	53883	26097	13989	0	5	Pass2	PepFrag2	None	6903668	DIDSIK	DIDSIK	446	6	3.88	1249	2	2	0	0	872059	49226		93	2.0	b4y3	138138	638	895997408068357	139199481613671	0.0940	Red	5106	6903865	6903890	172254	5065	5065.00	1.43	1
0	NCDO2118_RS00005	chromosomal replication initiator protein DnaA 575:1942 forward MW:51461	Regular	9594094	0	514610558	36	12	40	19.78	53883	26097	13989	0	6	Pass2	PepFrag2	None	15417132	YNFENFVQGPGNR	YNFENFVQGPGNR	121	13	7.00	1251	1	1	0	0	774437	48710	Missing	64	2.0	y11	212616	1361	148479005835059	108479005835059	0.0445	Red	8360	15417411	15417436	197769	2400	2400.00	2.00	2
0	NCDO2118_RS00005	chromosomal replication initiator protein DnaA 575:1942 forward MW:51461	Regular	9594094	0	514610558	36	12	40	19.78	53883	26097	13989	0	7	Pass2	PepFrag2	None	15207261	NDMDVQKDIDSIK	NDMDVQKDIDSIK	439	13	3.87	1250	1	1	0	0	822131	48969		60	1.9	b11	204231	1394	150869511231425	110869511231425	0.0413	Red	16850	15206799	15206825	284538	2225	2225.00	2.00	2
0	NCDO2118_RS00005	chromosomal replication initiator protein DnaA 575:1942 forward MW:51461	Regular	9594094	0	514610558	36	12	40	19.78	53883	26097	13989	0	8	Pass2	PepFrag2	None	22951292	IQDEVANYYHISFSDLVGPK	IQDEVANYYHISFSDLVGPK	368	20	4.30	1252	2	2	0	0	765649	48660	Identified	128	2.0	y2y17	291164	2104	198513535662455	923423571083036	0.0301	Red	13459	22950815	22950826	241834	1620	1620.00	3.00	3
0	NCDO2118_RS00005	chromosomal replication initiator protein DnaA 575:1942 forward MW:51461	Regular	9594094	0	514610558	36	12	40	19.78	53883	26097	13989	0	9	Pass2	PepFrag2	None	16227485	NEFFNTFNALYDK	NEFFNTFNALYDK	233	13	4.07	1247	0	0	0	0	1213561	50661		85	1.4	y9y12*	318287	1453	155096992717242	115096992717242	0.0176	Yellow	15640	16226910	16226933	265210	946	946.00	2.00	2
0	NCDO2118_RS00005	chromosomal replication initiator protein DnaA 575:1942 forward MW:51461	Regular	9594094	0	514610558	36	12	40	19.78	53883	26097	13989	0	10	Pass2	MissedCleavage	None	15737064	KNQMENFENTYR	KNQMENFENTYR	201	12	7.03	1244	0	0	0	0	2272435	53385		111	1.4	b9y6	162813	1396	151013780440696	111013780440696	0.0171	Yellow	6788	15737055	15737079	186332	924	924.00	2.00	2
0	NCDO2118_RS00005	chromosomal replication initiator protein DnaA 575:1942 forward MW:51461	Regular	9594094	0	514610558	36	12	40	19.78	53883	26097	13989	0	11	Pass2	VarMod	Phosphoryl STY(7);Phosphoryl STY(13)	19597959	DHTTVMYAYKQISDK	DHTTVMYAYKQISDK	422	15	7.67	1246	5	5	1	0	1749186	52248		1670	2.3	b6b6b15y1y9-H3PO4y14y14*y15	186522	1645	168475557585787	723170383905244	0.0580	Yellow	15141	19598013	19598038	259238	3123	3123.00	2.57	3
0	NCDO2118_RS00005	chromosomal replication initiator protein DnaA 575:1942 forward MW:51461	Regular	9594094	0	514610558	36	12	40	19.78	53883	26097	13989	0	12	Pass2	VarMod	Oxidation M(6)	12445616	DHTTVMYAYK	DHTTVMYAYK	422	10	7.68	1245	2	2	0	0	1682443	52079		131	1.9	y4y9	162410	1108	129455192383322	89455192383322	0.0480	Yellow	13144	12445522	12445554	238395	2587	2587.00	2.00	2
0	NCDO2118_RS00005	chromosomal replication initiator protein DnaA 575:1942 forward MW:51461	Regular	6746724	0	514610558	27	9	40	12.09	74866	39706	10453	1	1	Pass1	PepFrag1	None	11736474	VTELAQQSIGK	VTELAQQSIGK	13	11	7.00	2346	14	14	9	5	268238600	72576		6262	4.2	b2b2b3b3b4b5b6b6*b7b8b9*b11y2y4y6y7y8y9y10y10*	173263	1106	129299363058093	892993630580926	0.2833	Green	1201	11736421	11736446	156606	21213	21213.00	2.00	2
0	NCDO2118_RS00005	chromosomal replication initiator protein DnaA 575:1942 forward MW:51461	Regular	6746724	0	514610558	27	9	40	12.09	74866	39706	10453	0	2	Pass1	PepFrag1	None	14177645	NATQQSLSNLTIK	NATQQSLSNLTIK	354	13	10.10	2347	4	4	1	0	4127823	54448		1549	4.1	b4b7*b9b10y4y13	208573	1326	145922406601142	572816044007611	0.2369	Yellow	6993	14177670	14177718	227044	17736	17736.00	2.88	3
0	NCDO2118_RS00005	chromosomal replication initiator protein DnaA 575:1942 forward MW:51461	Regular	6746724	0	514610558	27	9	40	12.09	74866	39706	10453	0	3	Pass1	PepFrag1	None	26763780	IQDEVANYYHISFSDLVGPKRPK	IQDEVANYYHISFSDLVGPKRPK	368	23	7.67	2348	0	0	0	0	1609946	50359	Missing	31	1.6	y9	254134	2477	221331709597505	706658547987523	0.0101	Red	8636	26763648	26763648	241821	757	757.00	4.00	4
0	NCDO2118_RS00005	chromosomal replication initiator protein DnaA 575:1942 forward MW:51461	Regular	6746724	0	514610558	27	9	40	12.09	74866	39706	10453	0	4	Pass2	PepFrag2	None	28694553	ELLGTSLPAIGTAFGGRDHTTVMYAYK	ELLGTSLPAIGTAFGGRDHTTVMYAYK	405	27	7.71	2349	2	2	1	0	1053509	48517	Missing	233	1.9	b4b5b5	324062	2671	232742427419337	530969709677349	0.0126	Red	10641	28694291	28694291	258665	947	947.00	5.00	5
0	NCDO2118_RS00005	chromosomal replication initiator protein DnaA 575:1942 forward MW:51461	Regular	6746724	0	514610558	27	9	40	12.09	74866	39706	10453	0	5	Pass2	MissedCleavage	None	17959661	IPQELNNLEDRLVSR	IPQELNNLEDRLVSR	256	15	4.44	2350	1	1	0	0	622796	46234	Missing	35	1.4	b4	243296	1675	170517716623193	452588583115963	0.0105	Red	10846	17959482	17959482	260399	784	784.00	4.00	4
0	NCDO2118_RS00005	chromosomal replication initiator protein DnaA 575:1942 forward MW:51461	Regular	6746724	0	514610558	27	9	40	12.09	74866	39706	10453	0	6	Pass2	VarMod	Oxidation M(4)	10095499	QIAMYLVR	QIAMYLVR	397	8	9.84	2352	2	2	0	0	4431968	54757		1396	4.2	y6y8	235190	947	116589548425828	765895484258282	0.4050	Yellow	3851	10095519	10095547	195455	30319	30319.00	1.92	2
0	NCDO2118_RS00005	chromosomal replication initiator protein DnaA 575:1942 forward MW:51461	Regular	6746724	0	514610558	27	9	40	12.09	74866	39706	10453	0	7	Pass2	VarMod	Phosphoryl STY(3);Phosphoryl STY(19)	34344972	QAYDFFIEPAQLMSVEQDTANILLDSGMK	QAYDFFIEPAQLMSVEQDTANILLDSGMK	24	29	3.43	2351	4	4	0	0	1558225	50217	Missing	720	2.1	b1b17y6y8y16	446230	3026	252933051347924	443110171159748	0.0171	Red	8808	34345223	34345223	243420	1281	1281.00	6.00	6
0	NCDO2118_RS00005	chromosomal replication initiator protein DnaA 575:1942 forward MW:51461	Regular	6746724	0	514610558	27	9	40	12.09	74866	39706	10453	0	8	Pass2	VarMod	Oxidation M(6)	18158582	DHTTVMYAYKQISDK	DHTTVMYAYKQISDK	422	15	7.67	2354	0	0	0	0	788058	47257		84	1.5	y7y12*	192596	1645	168475557585787	128475557585787	0.0132	Red	20518	18158683	18158683	380226	990	990.00	2.00	2
0	NCDO2118_RS00005	chromosomal replication initiator protein DnaA 575:1942 forward MW:51461	Regular	6746724	0	514610558	27	9	40	12.09	74866	39706	10453	0	9	Pass2	VarMod	Phosphoryl STY(*)	28653302	SESSRLEFPSETLSYIAGQIDSNVR	SESSRLEFPSETLSYIAGQIDSNVR	295	25	4.16	2353	0	0	0	0	1058475	48538	Missing	143	1.7	b9y10*y12	315080	2537	224891623170823	109927748780549	0.0112	Red	21703	28653542	28653500	419296	839	839.00	3.00	3
0	NCDO2118_RS00005	chromosomal replication initiator protein DnaA 575:1942 forward MW:51461	Regular	11502040	0	514610558	71	15	40	38.90	384839	360439	97347	1	1	Pass1	PepFrag1	None	23101864	NLDLLLLDDVQFFSDKEGTK	NLDLLLLDDVQFFSDKEGTK	213	20	3.77	4155	11	11	4	2	11489150	61211		60570	13.3	b3b4b13b14b15b18*y4y6y6y7y7y9y10y13y17y18y19y20	436655	2162	202145197177627	162145197177627	0.7397	Green	36419	23101862	23101831	353879	284673	284673.00	2.49	2
0	NCDO2118_RS00005	chromosomal replication initiator protein DnaA 575:1942 forward MW:51461	Regular	11502040	0	514610558	71	15	40	38.90	384839	360439	97347	0	2	Pass1	PepFrag1	None	16599064	ELLGTSLPAIGTAFGGR	ELLGTSLPAIGTAFGGR	405	17	7.00	4151	14	14	7	2	205989600	73746	Identified	22484	7.0	b2b2b3b4b5b5b7b8b10y3y4y5y6y7y10y11y12y14y15y17	322568	1563	162829198900762	122829198900762	0.1497	Green	32643	16599092	16599105	338203	57612	57612.00	2.00	2
0	NCDO2118_RS00005	chromosomal replication initiator protein DnaA 575:1942 forward MW:51461	Regular	11502040	0	514610558	71	15	40	38.90	384839	360439	97347	0	3	Pass1	PepFrag1	None	22391241	LEFPSETLSYIAGQIDSNVR	LEFPSETLSYIAGQIDSNVR	300	20	3.83	4152	16	16	9	3	50533540	67644	Identified	7878	4.9	b1b2b3b9b10b10b11b11b12b14*b17y4y5y8y8*y8y9y9y10y10y15y16y17y20	346063	2061	195799522665613	155799522665613	0.0472	Green	43888	22391160	22391135	388872	18154	18154.00	2.48	2
0	NCDO2118_RS00005	chromosomal replication initiator protein DnaA 575:1942 forward MW:51461	Regular	11502040	0	514610558	71	15	40	38.90	384839	360439	97347	0	4	Pass1	PepFrag1	None	8015267	MAILLIK	MAILLIK	288	7	10.10	4150	3	3	0	0	6450027	58703		229	2.0	b2b4y4	299649	822	106089933997782	660899339977815	0.0110	Yellow	19289	8015194	8015223	284499	4219	4219.00	2.00	2
0	NCDO2118_RS00005	chromosomal replication initiator protein DnaA 575:1942 forward MW:51461	Regular	11502040	0	514610558	71	15	40	38.90	384839	360439	97347	0	5	Pass1	PepFrag1	None	21030764	THLMHAIGNQILTDNPTAR	THLMHAIGNQILTDNPTAR	164	19	8.01	4149	3	3	1	0	5337865	57881	Missing	590	2.4	y1y7y7*y8	249176	1952	188833703034377	858891353562511	0.0071	Yellow	8180	21030699	21030714	237267	2720	2720.00	3.00	3
0	NCDO2118_RS00005	chromosomal replication initiator protein DnaA 575:1942 forward MW:51461	Regular	11502040	0	514610558	71	15	40	38.90	384839	360439	97347	0	6	Pass1	PepFrag1	None	7393774	KDYWK	KDYWK	53	5	9.63	4154	1	1	0	0	2593066	54746		41	1.4	y3	205979	665	921101305263869	144220261052774	0.0062	Yellow	18595	7393767	7393790	281712	2388	2388.00	1.00	1
0	NCDO2118_RS00005	chromosomal replication initiator protein DnaA 575:1942 forward MW:51461	Regular	11502040	0	514610558	71	15	40	38.90	384839	360439	97347	0	7	Pass1	PepFrag1	None	32745646	QAYDFFIEPAQLMSVEQDTANILLDSGMK	QAYDFFIEPAQLMSVEQDTANILLDSGMK	24	29	3.43	4153	4	4	0	0	9992787	60605	Identified	433	2.4	b5*b8y5y7y14y29*	486154	3026	252933051347924	12862203423195	0.0046	Green	53023	32745561	32745437	485809	1757	1757.00	3.00	3
0	NCDO2118_RS00005	chromosomal replication initiator protein DnaA 575:1942 forward MW:51461	Regular	11502040	0	514610558	71	15	40	38.90	384839	360439	97347	0	8	Pass2	PepFrag2	None	26344436	QIAMYLVRELLGTSLPAIGTAFGGR	QIAMYLVRELLGTSLPAIGTAFGGR	397	25	9.84	4163	2	2	1	0	1673002	52843	Missing	283	1.9	b12b13b18y8y18	414407	2510	22329317476201	18329317476201	0.0028	Red	37439	26345103	26345038	358466	1073	1073.00	2.00	2
0	NCDO2118_RS00005	chromosomal replication initiator protein DnaA 575:1942 forward MW:51461	Regular	11502040	0	514610558	71	15	40	38.90	384839	360439	97347	0	9	Pass2	MissedCleavage	None	24293147	VEFVARANGIAVVDIETASQALR	VEFVARANGIAVVDIETASQALR	328	23	4.44	4159	3	3	0	0	3690588	56279		912	2.1	b2b6b14b19*y4y6*y9y11*y13y15	354581	2291	210108212006672	65054106003336	0.0043	Yellow	32925	24293357	24293372	339385	1642	1642.00	3.60	4
0	NCDO2118_RS00005	chromosomal replication initiator protein DnaA 575:1942 forward MW:51461	Regular	11502040	0	514610558	71	15	40	38.90	384839	360439	97347	0	10	Pass2	MissedCleavage	None	17689228	KQSDLITTAGFEVFGR	KQSDLITTAGFEVFGR	58	16	7.03	4156	2	2	0	0	4849814	57465		252	1.9	b7*y5y7y13y16*	467846	1642	168270661771182	128270661771182	0.0043	Yellow	52533	17689137	17689145	478021	1641	1641.00	2.20	2
0	NCDO2118_RS00005	chromosomal replication initiator protein DnaA 575:1942 forward MW:51461	Regular	11502040	0	514610558	71	15	40	38.90	384839	360439	97347	0	11	Pass2	MissedCleavage	None	24282143	LVSRFSWGLTTDITAPDYETR	LVSRFSWGLTTDITAPDYETR	267	21	4.31	4158	2	2	0	0	10354110	60759	Missing	299	1.7	b5b12b13y3	318692	2226	206115067482983	166115067482983	0.0026	Green	27846	24282207	24282164	318259	989	989.00	2.00	2
0	NCDO2118_RS00005	chromosomal replication initiator protein DnaA 575:1942 forward MW:51461	Regular	11502040	0	514610558	71	15	40	38.90	384839	360439	97347	0	12	Pass2	MissedCleavage	None	23972368	GSQIVLTSDRIPQELNNLEDR	GSQIVLTSDRIPQELNNLEDR	246	21	4.06	4157	1	1	0	0	2225150	54081	Identified	560	1.6	b12y8*y10	316076	2218	205620934570718	970806230471451	0.0022	Red	32789	23972142	23972132	338803	864	864.00	3.00	3
0	NCDO2118_RS00005	chromosomal replication initiator protein DnaA 575:1942 forward MW:51461	Regular	11502040	0	514610558	71	15	40	38.90	384839	360439	97347	0	13	Pass2	VarMod	Oxidation M(1)	8175216	MAILLIK	MAILLIK	288	7	10.10	4161	4	4	0	0	1905260	53407		2249	2.0	b3b6y2y7	299649	822	106089933997782	172179867995563	0.0113	Red	30596	8175216	8175239	329528	4362	4362.00	1.00	1
0	NCDO2118_RS00005	chromosomal replication initiator protein DnaA 575:1942 forward MW:51461	Regular	11502040	0	514610558	71	15	40	38.90	384839	360439	97347	0	14	Pass2	VarMod	Oxidation M(10)	17229360	EIAFPRQIAMYLVR	EIAFPRQIAMYLVR	391	14	9.84	4162	4	4	1	0	1246597	51565	Identified	493	1.7	b3b4b7*y1y2y4	325756	1620	166764258677485	711761724516567	0.0037	Red	20296	17229291	17229328	288552	1419	1419.00	3.00	3
0	NCDO2118_RS00005	chromosomal replication initiator protein DnaA 575:1942 forward MW:51461	Regular	11502040	0	514610558	71	15	40	38.90	384839	360439	97347	0	15	Pass2	VarMod	Phosphoryl STY(*)	20528950	FSWGLTTDITAPDYETR	FSWGLTTDITAPDYETR	271	17	3.70	4160	1	1	0	0	1322537	51822	Identified	74	1.8	y5y6	329411	1776	177305255413104	137305255413104	0.0034	Red	15698	20528850	20528840	270827	1326	1326.00	2.00	2
0	NCDO2118_RS00005	chromosomal replication initiator protein DnaA 575:1942 forward MW:51461	Regular	7389711	0	514610558	27	10	40	19.78	139567	39640	24081	1	1	Pass1	PepFrag1	None	13406805	IPQELNNLEDR	IPQELNNLEDR	256	11	3.83	1233	10	10	7	1	213595400	71982	Identified	12357	4.5	b4y2y3y4y6y7y8y9y9*y9y10y11	220369	1225	13841517091563	984151709156301	0.1882	Green	7558	13406765	13406788	202867	26268	26268.00	2.00	2
0	NCDO2118_RS00005	chromosomal replication initiator protein DnaA 575:1942 forward MW:51461	Regular	7389711	0	514610558	27	10	40	19.78	139567	39640	24081	0	2	Pass1	PepFrag1	None	10755742	GSQIVLTSDR	GSQIVLTSDR	246	10	7.00	1231	7	7	3	2	76644490	67531		3502	3.1	b3b3b5b10y4y5y5y6y6y7y8*y10	181140	993	120335139710428	803351397104284	0.0753	Green	3593	10755701	10755728	164311	10504	10504.00	1.94	2
0	NCDO2118_RS00005	chromosomal replication initiator protein DnaA 575:1942 forward MW:51461	Regular	7389711	0	514610558	27	10	40	19.78	139567	39640	24081	0	3	Pass1	PepFrag1	None	14456114	NQMENFENTYR	NQMENFENTYR	202	11	4.26	1232	5	5	0	1	16664380	60904		751	2.0	b4y4y5y7y9y11	190474	1261	141113866590153	101113866590153	0.0205	Green	6784	14456115	14456137	195788	2868	2868.00	2.00	2
0	NCDO2118_RS00005	chromosomal replication initiator protein DnaA 575:1942 forward MW:51461	Regular	7389711	0	514610558	27	10	40	19.78	139567	39640	24081	0	4	Pass2	PepFrag2	None	18778664	YVSSENFVNDYVNATR	YVSSENFVNDYVNATR	185	16	4.07	1238	1	1	0	0	1947842	51582		2138	3.5	b7*y8y16y16*	252834	1674	170449842120481	130449842120481	0.0628	Yellow	12478	18778448	18778453	259860	8758	8758.00	2.00	2
0	NCDO2118_RS00005	chromosomal replication initiator protein DnaA 575:1942 forward MW:51461	Regular	7389711	0	514610558	27	10	40	19.78	139567	39640	24081	0	5	Pass2	PepFrag2	None	32745646	QAYDFFIEPAQLMSVEQDTANILLDSGMK	QAYDFFIEPAQLMSVEQDTANILLDSGMK	24	29	3.43	1239	0	0	0	0	853537	47999	Missing	136	3.2	y13*y22*	438520	3026	252933051347924	12862203423195	0.0280	Red	16399	32744992	32744938	366178	3911	3911.00	3.00	3
0	NCDO2118_RS00005	chromosomal replication initiator protein DnaA 575:1942 forward MW:51461	Regular	7389711	0	514610558	27	10	40	19.78	139567	39640	24081	0	6	Pass2	PepFrag2	None	15207261	NDMDVQKDIDSIK	NDMDVQKDIDSIK	439	13	3.87	1240	0	0	0	0	545975	46058		34	1.7	b7*	198157	1394	150869511231425	110869511231425	0.0118	Red	2992	15207496	15207515	157528	1648	1648.00	2.00	2
0	NCDO2118_RS00005	chromosomal replication initiator protein DnaA 575:1942 forward MW:51461	Regular	7389711	0	514610558	27	10	40	19.78	139567	39640	24081	0	7	Pass2	MissedCleavage	None	15947795	MASLNENQKFWAR	MASLNENQKFWAR	0	13	10.12	1234	0	0	0	0	2579982	52802		46	1.8	y11	257376	1451	154954636584765	114954636584765	0.0127	Yellow	12180	15947672	15947689	255948	1775	1775.00	2.00	2
0	NCDO2118_RS00005	chromosomal replication initiator protein DnaA 575:1942 forward MW:51461	Regular	7389711	0	514610558	27	10	40	19.78	139567	39640	24081	0	8	Pass2	VarMod	Phosphoryl STY(8)	14977308	NATQQSLSNLTIK	NATQQSLSNLTIK	354	13	10.10	1236	1	1	0	0	247293	42618		3409	6.9	b9-H3PO4b10-H3PO4y2y6y6-H3PO4y13*	197247	1326	145922406601142	105922406601142	0.5125	Red	11518	14977393	14977414	247596	71525	71525.00	1.99	2
0	NCDO2118_RS00005	chromosomal replication initiator protein DnaA 575:1942 forward MW:51461	Regular	7389711	0	514610558	27	10	40	19.78	139567	39640	24081	0	9	Pass2	VarMod	Oxidation M(3)	15367210	NDMDVQKDIDSIK	NDMDVQKDIDSIK	439	13	3.87	1237	1	1	0	0	882881	48145		720	3.3	y5y8y8	198157	1394	150869511231425	60579674154283	0.0694	Red	2958	15367236	15367254	157147	9686	9686.00	2.89	3
0	NCDO2118_RS00005	chromosomal replication initiator protein DnaA 575:1942 forward MW:51461	Regular	7389711	0	514610558	27	10	40	19.78	139567	39640	24081	0	10	Pass2	VarMod	Oxidation M(13);Phosphoryl STY(26)	33705258	QAYDFFIEPAQLMSVEQDTANILLDSGMK	QAYDFFIEPAQLMSVEQDTANILLDSGMK	24	29	3.43	1235	2	2	0	0	1830768	51313	Missing	988	2.8	b6*b12y10y11*y14	438520	3026	252933051347924	864665256739621	0.0188	Yellow	8529	33705463	33705463	213696	2624	2624.00	4.00	4
0	NCDO2118_RS00005	chromosomal replication initiator protein DnaA 575:1942 forward MW:51461	Regular	5805834	0.23	514610558	37	11	40	23.30	75400	61369	24118	1	1	Pass1	PepFrag1	None	16599064	ELLGTSLPAIGTAFGGR	ELLGTSLPAIGTAFGGR	405	17	7.00	4547	9	9	5	1	122005200	68502	Identified	12889	6.4	b3b4b5b11b14y6y7y8y10y11y12y14y15y15	316576	1563	162829198900762	122829198900762	0.5983	Green	29662	16599114	16599120	340659	45109	45109.00	2.00	2
0	NCDO2118_RS00005	chromosomal replication initiator protein DnaA 575:1942 forward MW:51461	Regular	5805834	0.23	514610558	37	11	40	23.30	75400	61369	24118	0	2	Pass1	PepFrag1	None	22391241	LEFPSETLSYIAGQIDSNVR	LEFPSETLSYIAGQIDSNVR	300	20	3.83	4549	6	6	0	1	10926950	58024	Identified	3949	4.2	b3b5b6b9y4y8y11*y15*y17y20	344712	2061	195799522665613	905330151104089	0.1592	Yellow	40786	22391183	22391186	391799	12006	12006.00	2.47	3
0	NCDO2118_RS00005	chromosomal replication initiator protein DnaA 575:1942 forward MW:51461	Regular	5805834	0.23	514610558	37	11	40	23.30	75400	61369	24118	0	3	Pass1	PepFrag1	None	17279286	ANGIAVVDIETASQALR	ANGIAVVDIETASQALR	334	17	4.07	4550	2	2	1	0	6625205	55851		1176	2.7	b16*y13y14y15*	317452	1622	166901484985187	126901484985187	0.0564	Yellow	31572	17279279	17279281	348251	4254	4254.00	2.00	2
0	NCDO2118_RS00005	chromosomal replication initiator protein DnaA 575:1942 forward MW:51461	Regular	5805834	0.23	514610558	37	11	40	23.30	75400	61369	24118	0	4	Pass1	PepFrag1	None	8015267	MAILLIK	MAILLIK	288	7	10.10	4546	2	2	0	0	5104689	54718		171	1.6	y3y6	311609	822	106089933997782	660899339977815	0.0339	Yellow	17129	8015207	8015231	288702	2556	2556.00	2.00	2
0	NCDO2118_RS00005	chromosomal replication initiator protein DnaA 575:1942 forward MW:51461	Regular	5805834	0.23	514610558	37	11	40	23.30	75400	61369	24118	0	5	Pass1	PepFrag1	None	32745646	QAYDFFIEPAQLMSVEQDTANILLDSGMK	QAYDFFIEPAQLMSVEQDTANILLDSGMK	24	29	3.43	4548	3	3	1	0	6919510	56039	Missing	167	2.0	b6b7b14*y9	491961	3026	252933051347924	12862203423195	0.0150	Yellow	49139	32745748	32745657	486824	1128	1128.00	3.00	3
0	NCDO2118_RS00005	chromosomal replication initiator protein DnaA 575:1942 forward MW:51461	Regular	5805834	0.23	514610558	37	11	40	23.30	75400	61369	24118	0	6	Pass2	MissedCleavage	None	17998633	DHTTVMYAYKQISDK	DHTTVMYAYKQISDK	422	15	7.67	4553	4	4	0	0	2929511	52307		382	2.0	b11y1y6y15	192154	1645	168475557585787	128475557585787	0.0277	Red	3217	17998490	17998488	206969	2089	2089.00	2.14	2
0	NCDO2118_RS00005	chromosomal replication initiator protein DnaA 575:1942 forward MW:51461	Regular	5805834	0.23	514610558	37	11	40	23.30	75400	61369	24118	0	7	Pass2	MissedCleavage	None	17689228	KQSDLITTAGFEVFGR	KQSDLITTAGFEVFGR	58	16	7.03	4551	1	1	0	0	2187230	51038		500	1.7	b6b9y6y8y13	470696	1642	168270661771182	128270661771182	0.0173	Red	48652	17689066	17689066	478163	1307	1307.00	2.00	2
0	NCDO2118_RS00005	chromosomal replication initiator protein DnaA 575:1942 forward MW:51461	Regular	5805834	0.23	514610558	37	11	40	23.30	75400	61369	24118	0	8	Pass2	MissedCleavage	None	21190455	IKYVSSENFVNDYVNATR	IKYVSSENFVNDYVNATR	183	18	6.89	4552	2	2	0	0	4455401	54128		357	1.5	b5b8b9	315494	1933	187606351217852	147606351217852	0.0104	Red	22698	21190514	21190492	312415	787	787.00	2.00	2
0	NCDO2118_RS00005	chromosomal replication initiator protein DnaA 575:1942 forward MW:51461	Regular	5805834	0.23	514610558	37	11	40	23.30	75400	61369	24118	0	9	Pass2	VarMod	Phosphoryl STY(11);Phosphoryl STY(14)	19059082	SLKNATQQSLSNLTIK	SLKNATQQSLSNLTIK	351	16	10.60	4556	4	4	0	1	7881408	56605		2962	2.3	b4b7*b13b13b14-H3PO4b15*y3y3-H3PO4y5-H3PO4y7y8-H3PO4y9-2(H3PO4)y12-H3PO4y13-2(H3PO4)y16	232879	1658	169362004433111	129362004433111	0.0390	Yellow	39803	19059083	19059075	387090	2937	2937.00	2.00	2
0	NCDO2118_RS00005	chromosomal replication initiator protein DnaA 575:1942 forward MW:51461	Regular	5805834	0.23	514610558	37	11	40	23.30	75400	61369	24118	0	10	Pass2	VarMod	Oxidation M(4);Phosphoryl STY(17)	24402166	THLMHAIGNQILTDNPTARIK	THLMHAIGNQILTDNPTARIK	164	21	10.09	4555	3	3	0	0	3444497	53010	Missing	1307	2.2	b7b13*b21y7y10y13	258154	2211	205188080738039	165188080738039	0.0264	Red	35937	24402252	24402202	368053	1993	1993.00	2.00	2
0	NCDO2118_RS00005	chromosomal replication initiator protein DnaA 575:1942 forward MW:51461	Regular	5805834	0.23	514610558	37	11	40	23.30	75400	61369	24118	0	11	Pass2	VarMod	Phosphoryl STY(*)	16788411	STAKPASPLVSGLNEK	STAKPASPLVSGLNEK	105	16	9.88	4554	1	1	0	0	1468613	49308	Missing	258	1.7	y6y6*	188932	1502	15856460717578	11856460717578	0.0164	Red	18851	16788535	16788540	296550	1234	1234.00	2.00	2
0	NCDO2118_RS00005	chromosomal replication initiator protein DnaA 575:1942 forward MW:51461	Regular	4386302	0.24	514610558	25	7	40	11.87	41344	34813	11351	1	1	Pass1	PepFrag1	None	16599064	ELLGTSLPAIGTAFGGR	ELLGTSLPAIGTAFGGR	405	17	7.00	3721	11	11	4	2	101142000	66470	Identified	6127	5.1	b2b3b4b5b12y3y6y7y8y10y12y14y15	328866	1563	162829198900762	122829198900762	0.5893	Green	22844	16599102	16599112	340820	24362	24362.00	2.01	2
0	NCDO2118_RS00005	chromosomal replication initiator protein DnaA 575:1942 forward MW:51461	Regular	4386302	0.24	514610558	25	7	40	11.87	41344	34813	11351	0	2	Pass1	PepFrag1	None	22391241	LEFPSETLSYIAGQIDSNVR	LEFPSETLSYIAGQIDSNVR	300	20	3.83	3722	6	6	1	0	7941663	55420	Missing	2933	3.3	b10b16b17y5*y6y9y10y11y12y20	351087	2061	195799522665613	155799522665613	0.1558	Yellow	32179	22391257	22391226	393023	6441	6441.00	2.39	2
0	NCDO2118_RS00005	chromosomal replication initiator protein DnaA 575:1942 forward MW:51461	Regular	4386302	0.24	514610558	25	7	40	11.87	41344	34813	11351	0	3	Pass1	PepFrag1	None	17279286	ANGIAVVDIETASQALR	ANGIAVVDIETASQALR	334	17	4.07	3723	1	1	0	0	3303275	51610		431	2.7	b17y8	319153	1622	166901484985187	126901484985187	0.0970	Red	24357	17279220	17279226	348799	4010	4010.00	2.00	2
0	NCDO2118_RS00005	chromosomal replication initiator protein DnaA 575:1942 forward MW:51461	Regular	4386302	0.24	514610558	25	7	40	11.87	41344	34813	11351	0	4	Pass2	PepFrag2	None	26763780	IQDEVANYYHISFSDLVGPKRPK	IQDEVANYYHISFSDLVGPKRPK	368	23	7.67	3727	4	4	0	0	2667992	50683	Missing	1361	2.2	b6*b10y8y12y18*y23	251921	2477	221331709597505	107554473065003	0.0444	Red	8876	26764118	26764088	269394	1836	1836.00	3.22	3
0	NCDO2118_RS00005	chromosomal replication initiator protein DnaA 575:1942 forward MW:51461	Regular	4386302	0.24	514610558	25	7	40	11.87	41344	34813	11351	0	5	Pass2	MissedCleavage	None	17069411	EIAFPRQIAMYLVR	EIAFPRQIAMYLVR	391	14	9.84	3726	1	1	0	0	1109192	46871	Missing	354	2.2	b7b9b10	341507	1620	166764258677485	711761724516567	0.0669	Red	24398	17069491	17069529	349025	2764	2764.00	3.00	3
0	NCDO2118_RS00005	chromosomal replication initiator protein DnaA 575:1942 forward MW:51461	Regular	4386302	0.24	514610558	25	7	40	11.87	41344	34813	11351	0	6	Pass2	MissedCleavage	None	17959661	IPQELNNLEDRLVSR	IPQELNNLEDRLVSR	256	15	4.44	3724	1	1	0	0	774879	45313	Missing	83	1.6	b6	260043	1675	170517716623193	452588583115963	0.0260	Red	4749	17959472	17959506	236749	1073	1073.00	4.00	4
0	NCDO2118_RS00005	chromosomal replication initiator protein DnaA 575:1942 forward MW:51461	Regular	4386302	0.24	514610558	25	7	40	11.87	41344	34813	11351	0	7	Pass2	MissedCleavage	None	20561397	ANGIAVVDIETASQALRSLK	ANGIAVVDIETASQALRSLK	334	20	7.03	3725	1	1	0	0	1159143	47062		62	1.6	b6b12	322529	1954	188962665788145	148962665788145	0.0208	Red	18031	20561243	20561227	317871	858	858.00	2.00	2
0	NCDO2118_RS00005	chromosomal replication initiator protein DnaA 575:1942 forward MW:51461	Regular	8924589	0.26	514610558	50	14	40	33.41	96887	72171	25583	1	1	Pass1	PepFrag1	None	16599064	ELLGTSLPAIGTAFGGR	ELLGTSLPAIGTAFGGR	405	17	7.00	3871	10	10	4	2	119628600	70284	Identified	12539	6.1	b2b5b10b17y6y7y10y10y12y13y14y15y15	324065	1563	162829198900762	122829198900762	0.3993	Green	27865	16599098	16599119	339427	38689	38689.00	2.00	2
0	NCDO2118_RS00005	chromosomal replication initiator protein DnaA 575:1942 forward MW:51461	Regular	8924589	0.26	514610558	50	14	40	33.41	96887	72171	25583	0	2	Pass1	PepFrag1	None	9935550	QIAMYLVR	QIAMYLVR	397	8	9.84	3877	5	5	1	1	29775900	64245		2249	3.7	b2b3b5b5*y6y8	236091	947	116589548425828	765895484258282	0.2228	Green	16662	9935502	9935538	290847	21586	21586.00	1.72	2
0	NCDO2118_RS00005	chromosomal replication initiator protein DnaA 575:1942 forward MW:51461	Regular	8924589	0.26	514610558	50	14	40	33.41	96887	72171	25583	0	3	Pass1	PepFrag1	None	22391241	LEFPSETLSYIAGQIDSNVR	LEFPSETLSYIAGQIDSNVR	300	20	3.83	3873	8	8	2	1	6853290	57865	Missing	2638	4.2	b6b7b8b9b10b12b15*b16b16b18*y5y6y7*y8y8y9y11y14	347212	2061	195799522665613	905330151104089	0.1228	Yellow	37998	22391151	22391164	390935	11896	11896.00	2.53	3
0	NCDO2118_RS00005	chromosomal replication initiator protein DnaA 575:1942 forward MW:51461	Regular	8924589	0.26	514610558	50	14	40	33.41	96887	72171	25583	0	4	Pass1	PepFrag1	None	22951292	IQDEVANYYHISFSDLVGPK	IQDEVANYYHISFSDLVGPK	368	20	4.30	3870	4	4	1	0	12358430	60426	Missing	3542	3.1	b2b13b15*y19y20	323608	2104	198513535662455	923423571083036	0.0553	Green	24569	22951253	22951262	323631	5357	5357.00	2.75	3
0	NCDO2118_RS00005	chromosomal replication initiator protein DnaA 575:1942 forward MW:51461	Regular	8924589	0.26	514610558	50	14	40	33.41	96887	72171	25583	0	5	Pass1	PepFrag1	None	16408279	QSDLITTAGFEVFGR	QSDLITTAGFEVFGR	59	15	4.07	3872	2	2	0	1	4437629	55977		240	1.8	b11y4	336790	1507	158916308824543	118916308824543	0.0172	Yellow	28281	16408373	16408395	341771	1666	1666.00	2.00	2
0	NCDO2118_RS00005	chromosomal replication initiator protein DnaA 575:1942 forward MW:51461	Regular	8924589	0.26	514610558	50	14	40	33.41	96887	72171	25583	0	6	Pass1	PepFrag1	None	21030764	THLMHAIGNQILTDNPTAR	THLMHAIGNQILTDNPTAR	164	19	8.01	3868	1	1	0	0	2793571	53967	Missing	703	1.5	y9y11y12	259503	1952	188833703034377	858891353562511	0.0084	Yellow	8087	21030590	21030611	246991	818	818.00	3.00	3
0	NCDO2118_RS00005	chromosomal replication initiator protein DnaA 575:1942 forward MW:51461	Regular	8924589	0.26	514610558	50	14	40	33.41	96887	72171	25583	0	7	Pass1	PepFrag1	None	17279286	ANGIAVVDIETASQALR	ANGIAVVDIETASQALR	334	17	4.07	3869	3	3	0	1	3118882	54446		363	1.5	b10*b11y2y6y9*	317752	1622	166901484985187	712676566567915	0.0079	Yellow	18673	17279199	17279236	299431	764	764.00	3.00	3
0	NCDO2118_RS00005	chromosomal replication initiator protein DnaA 575:1942 forward MW:51461	Regular	8924589	0.26	514610558	50	14	40	33.41	96887	72171	25583	0	8	Pass2	PepFrag2	None	8015267	MAILLIK	MAILLIK	288	7	10.10	3876	9	9	7	3	157921700	71490		1764	2.2	b2b3b4b5y3y4y5y6y7	303692	822	106089933997782	172179867995563	0.0582	Green	15979	8015173	8015198	287681	5634	5634.00	1.45	1
0	NCDO2118_RS00005	chromosomal replication initiator protein DnaA 575:1942 forward MW:51461	Regular	8924589	0.26	514610558	50	14	40	33.41	96887	72171	25583	0	9	Pass2	PepFrag2	None	13406805	IPQELNNLEDR	IPQELNNLEDR	256	11	3.83	3875	0	0	0	0	1029842	49634	Missing	161	2.0	b6	213897	1225	13841517091563	522767806104201	0.0313	Red	1603	13406800	13406844	184131	3033	3033.00	3.00	3
0	NCDO2118_RS00005	chromosomal replication initiator protein DnaA 575:1942 forward MW:51461	Regular	8924589	0.26	514610558	50	14	40	33.41	96887	72171	25583	0	10	Pass2	PepFrag2	None	32745646	QAYDFFIEPAQLMSVEQDTANILLDSGMK	QAYDFFIEPAQLMSVEQDTANILLDSGMK	24	29	3.43	3874	4	4	1	0	3456165	54892	Identified	371	2.1	b8b12*b14y11y12y12*y14*	491824	3026	252933051347924	12862203423195	0.0121	Yellow	45187	32745995	32745911	485873	1175	1175.00	3.00	3
0	NCDO2118_RS00005	chromosomal replication initiator protein DnaA 575:1942 forward MW:51461	Regular	8924589	0.26	514610558	50	14	40	33.41	96887	72171	25583	0	11	Pass2	PepFrag2	None	7204039	VEFVAR	VEFVAR	328	6	7.00	3881	2	2	0	0	424338	45783		126	1.0	b3y6	137651	669	924791251551206	144958250310241	0.0087	Red	10977	7204148	7204174	264366	847	847.00	1.00	1
0	NCDO2118_RS00005	chromosomal replication initiator protein DnaA 575:1942 forward MW:51461	Regular	8924589	0.26	514610558	50	14	40	33.41	96887	72171	25583	0	12	Pass2	PepFrag2	None	14177645	NATQQSLSNLTIK	NATQQSLSNLTIK	354	13	10.10	3880	0	0	0	0	949347	49280		88	1.3	y8	229006	1326	145922406601142	105922406601142	0.0078	Red	45755	14178010	14178039	500508	759	759.00	2.00	2
0	NCDO2118_RS00005	chromosomal replication initiator protein DnaA 575:1942 forward MW:51461	Regular	8924589	0.26	514610558	50	14	40	33.41	96887	72171	25583	0	13	Pass2	MissedCleavage	None	17959661	IPQELNNLEDRLVSR	IPQELNNLEDRLVSR	256	15	4.44	3878	0	0	0	0	1893805	52279	Missing	82	2.2	b6y3	248975	1675	170517716623193	452588583115963	0.0271	Red	4588	17959598	17959620	221686	2629	2629.00	3.78	4
0	NCDO2118_RS00005	chromosomal replication initiator protein DnaA 575:1942 forward MW:51461	Regular	8924589	0.26	514610558	50	14	40	33.41	96887	72171	25583	0	14	Pass2	VarMod	Oxidation M(4)	26504385	QIAMYLVRELLGTSLPAIGTAFGGR	QIAMYLVRELLGTSLPAIGTAFGGR	397	25	9.84	3879	2	2	0	0	1795511	52048	Identified	717	1.8	y9y9y10y12y12	417834	2510	22329317476201	18329317476201	0.0098	Red	26605	26504425	26504365	333192	952	952.00	2.00	2
0	NCDO2118_RS00005	chromosomal replication initiator protein DnaA 575:1942 forward MW:51461	Regular	8924589	0.26	514610558	50	14	40	33.41	96887	72171	25583	0	15	Pass2	InSource	None	7524124	AMYLVR	QIAMYLVR	399	6	9.84	3877	0	0	0	0	419516	0.0000		0	0.0		236091	709	9612959759198	15225919518396	0.0112	Green	16658	7524096	7524121	290836	1082	1082.00	1.00	1
0	NCDO2118_RS00005	chromosomal replication initiator protein DnaA 575:1942 forward MW:51461	Regular	3275566	0.29	514610558	23	6	40	19.56	61904	45497	7173	1	1	Pass1	PepFrag1	None	20059614	YVSSENFVNDYVNATRK	YVSSENFVNDYVNATRK	185	17	6.89	2270	1	1	0	0	946686	44915		170	4.7	b8y9y11*	221691	1809	179494858110877	139494858110877	0.3095	Red	12774	20059678	20059656	306666	19159	19159.00	2.35	2
0	NCDO2118_RS00005	chromosomal replication initiator protein DnaA 575:1942 forward MW:51461	Regular	3275566	0.29	514610558	23	6	40	19.56	61904	45497	7173	0	2	Pass1	PepFrag1	None	11736474	VTELAQQSIGK	VTELAQQSIGK	13	11	7.00	2268	11	11	6	2	119605500	65930		3362	3.6	b2b2b3b3b6y2y4y6y7y7*y8y9y10y10y11y11*	175711	1106	129299363058093	892993630580926	0.2260	Green	1330	11736461	11736487	156298	13989	13989.00	2.00	2
0	NCDO2118_RS00005	chromosomal replication initiator protein DnaA 575:1942 forward MW:51461	Regular	3275566	0.29	514610558	23	6	40	19.56	61904	45497	7173	0	3	Pass1	PepFrag1	None	14177645	NATQQSLSNLTIK	NATQQSLSNLTIK	354	13	10.10	2269	4	4	3	0	6148749	53041		615	3.6	b6b6*b7b8b9y4y6y12	212135	1326	145922406601142	572816044007611	0.1995	Yellow	5693	14177686	14177732	223535	12349	12349.00	2.87	3
0	NCDO2118_RS00005	chromosomal replication initiator protein DnaA 575:1942 forward MW:51461	Regular	3275566	0.29	514610558	23	6	40	19.56	61904	45497	7173	0	4	Pass1	PepFrag1	None	22391241	LEFPSETLSYIAGQIDSNVR	LEFPSETLSYIAGQIDSNVR	300	20	3.83	2271	2	2	1	0	1680721	47408	Missing	103	3.4	y5y6	327460	2061	195799522665613	905330151104089	0.1072	Red	10390	22391297	22391303	274765	6637	6637.00	2.91	3
0	NCDO2118_RS00005	chromosomal replication initiator protein DnaA 575:1942 forward MW:51461	Regular	3275566	0.29	514610558	23	6	40	19.56	61904	45497	7173	0	5	Pass2	PepFrag2	None	15207261	NDMDVQKDIDSIK	NDMDVQKDIDSIK	439	13	3.87	2273	1	1	0	0	3467764	50553		417	2.3	b9*y10y13	218985	1394	150869511231425	110869511231425	0.0547	Yellow	14566	15206932	15206945	333478	3387	3387.00	1.85	2
0	NCDO2118_RS00005	chromosomal replication initiator protein DnaA 575:1942 forward MW:51461	Regular	3275566	0.29	514610558	23	6	40	19.56	61904	45497	7173	0	6	Pass2	MissedCleavage	None	17998633	DHTTVMYAYKQISDK	DHTTVMYAYKQISDK	422	15	7.67	2272	4	4	0	0	4550955	51734		2506	3.0	b7y1y7y15	201663	1645	168475557585787	128475557585787	0.1031	Yellow	4945	17998597	17998592	214923	6383	6383.00	2.33	2
0	NCDO2118_RS00005	chromosomal replication initiator protein DnaA 575:1942 forward MW:51461	Regular	9531998	0.58	514610558	25	10	40	17.80	56981	45169.5	20454	1	1	Pass1	PepFrag1	None	13406805	IPQELNNLEDR	IPQELNNLEDR	256	11	3.83	1167	10	10	7	1	376329200	75548	Identified	15727	4.6	b4y2y3y4y5y6y7y8y9y9y10y11	201539	1225	13841517091563	984151709156301	0.4863	Green	8462	13406781	13406794	203182	27709	27709.00	2.00	2
0	NCDO2118_RS00005	chromosomal replication initiator protein DnaA 575:1942 forward MW:51461	Regular	9531998	0.58	514610558	25	10	40	17.80	56981	45169.5	20454	0	2	Pass1	PepFrag1	None	14456114	NQMENFENTYR	NQMENFENTYR	202	11	4.26	1169	3	3	0	0	13271350	61021		287	1.9	b3b5b11	185385	1261	141113866590153	101113866590153	0.0422	Green	7581	14456122	14456130	195753	2404	2404.00	2.00	2
0	NCDO2118_RS00005	chromosomal replication initiator protein DnaA 575:1942 forward MW:51461	Regular	9531998	0.58	514610558	25	10	40	17.80	56981	45169.5	20454	0	3	Pass2	PepFrag2	None	10755742	GSQIVLTSDR	GSQIVLTSDR	246	10	7.00	1176	2	2	0	0	522508	46973		2612	3.1	b6y10	180722	993	120335139710428	803351397104284	0.1892	Red	1119	10755351	10755374	117072	10780	10780.00	2.00	2
0	NCDO2118_RS00005	chromosomal replication initiator protein DnaA 575:1942 forward MW:51461	Regular	9531998	0.58	514610558	25	10	40	17.80	56981	45169.5	20454	0	4	Pass2	PepFrag2	None	10344935	MASLNENQK	MASLNENQK	0	9	7.00	1168	0	0	0	0	2567468	53887		163	1.6	y5	116402	938	115849685671389	758496856713894	0.0354	Yellow	4717	10344803	10344826	169649	2018	2018.00	2.00	2
0	NCDO2118_RS00005	chromosomal replication initiator protein DnaA 575:1942 forward MW:51461	Regular	9531998	0.58	514610558	25	10	40	17.80	56981	45169.5	20454	0	5	Pass2	PepFrag2	None	9014738	ELEGALNR	ELEGALNR	320	8	4.26	1174	2	2	0	0	1939098	52668		140	1.6	b6y3y6	157879	825	106347903600846	172695807201692	0.0351	Yellow	7734	9014392	9014407	196865	2002	2002.00	1.00	1
0	NCDO2118_RS00005	chromosomal replication initiator protein DnaA 575:1942 forward MW:51461	Regular	9531998	0.58	514610558	25	10	40	17.80	56981	45169.5	20454	0	6	Pass2	PepFrag2	None	16227485	NEFFNTFNALYDK	NEFFNTFNALYDK	233	13	4.07	1175	0	0	0	0	585213	47465		31	1.4	b7	333974	1453	155096992717242	115096992717242	0.0152	Red	14583	16226788	16226785	266313	868	868.00	2.00	2
0	NCDO2118_RS00005	chromosomal replication initiator protein DnaA 575:1942 forward MW:51461	Regular	9531998	0.58	514610558	25	10	40	17.80	56981	45169.5	20454	0	7	Pass2	MissedCleavage	None	15947795	MASLNENQKFWAR	MASLNENQKFWAR	0	13	10.12	1170	1	1	0	0	2012707	52830		312	2.5	b8*y11y13	251944	1451	154954636584765	114954636584765	0.0739	Yellow	13774	15947698	15947697	256694	4209	4209.00	2.00	2
0	NCDO2118_RS00005	chromosomal replication initiator protein DnaA 575:1942 forward MW:51461	Regular	9531998	0.58	514610558	25	10	40	17.80	56981	45169.5	20454	0	8	Pass2	MissedCleavage	None	17998633	DHTTVMYAYKQISDK	DHTTVMYAYKQISDK	422	15	7.67	1171	0	0	0	0	1544305	51679		38	1.5	y6	185354	1645	168475557585787	723170383905244	0.0166	Yellow	7180	17998453	17998466	192415	944	944.00	3.00	3
0	NCDO2118_RS00005	chromosomal replication initiator protein DnaA 575:1942 forward MW:51461	Regular	9531998	0.58	514610558	25	10	40	17.80	56981	45169.5	20454	0	9	Pass2	VarMod	Phosphoryl STY(3)	16747458	MASLNENQKFWAR	MASLNENQKFWAR	0	13	10.12	1172	4	4	0	0	2628274	53989		526	2.7	b3-H3PO4b11b13y1y7y9	251944	1451	154954636584765	114954636584765	0.0927	Yellow	9173	16747367	16747360	210149	5283	5283.00	2.00	2
0	NCDO2118_RS00005	chromosomal replication initiator protein DnaA 575:1942 forward MW:51461	Regular	9531998	0.58	514610558	25	10	40	17.80	56981	45169.5	20454	0	10	Pass2	VarMod	Phosphoryl STY(20);Phosphoryl STY(21)	28392375	NEFFNTFNALYDKGSQIVLTSDR	NEFFNTFNALYDKGSQIVLTSDR	233	23	4.31	1173	3	3	0	0	1243192	50737		618	1.6	y5y8y12y15	378764	2446	219481171354708	106320780903139	0.0134	Yellow	13610	28392218	28392158	254376	764	764.00	3.00	3
0	NCDO2118_RS00005	chromosomal replication initiator protein DnaA 575:1942 forward MW:51461	Regular	3657241	0.84	514610558	23	5	40	14.29	34966	26870	9147	1	1	Pass1	PepFrag1	None	10755742	GSQIVLTSDR	GSQIVLTSDR	246	10	7.00	2532	12	12	6	3	136049000	66968		6831	4.1	b2b3b3b4b4b5b10y1y3y4y4y5y7y8y8*y8y10	183793	993	120335139710428	803351397104284	0.6360	Green	3007	10755699	10755731	163303	22237	22237.00	1.92	2
0	NCDO2118_RS00005	chromosomal replication initiator protein DnaA 575:1942 forward MW:51461	Regular	3657241	0.84	514610558	23	5	40	14.29	34966	26870	9147	0	2	Pass1	PepFrag1	None	11736474	VTELAQQSIGK	VTELAQQSIGK	13	11	7.00	2531	5	5	3	1	17426120	58044		624	2.0	b2y6y7y8y9y9*	164053	1106	129299363058093	892993630580926	0.0859	Green	2296	11736417	11736447	155667	3003	3003.00	2.00	2
0	NCDO2118_RS00005	chromosomal replication initiator protein DnaA 575:1942 forward MW:51461	Regular	3657241	0.84	514610558	23	5	40	14.29	34966	26870	9147	0	3	Pass1	PepFrag1	None	23671173	MIDYELYANDELTELELHR	MIDYELYANDELTELELHR	74	19	3.82	2533	1	1	0	0	2718495	49975		47	2.0	b6	360805	2166	202394451467605	949296343117369	0.0466	Yellow	19136	23671234	23671227	345174	1630	1630.00	3.00	3
0	NCDO2118_RS00005	chromosomal replication initiator protein DnaA 575:1942 forward MW:51461	Regular	3657241	0.84	514610558	23	5	40	14.29	34966	26870	9147	0	4	Pass2	PepFrag2	None	10344935	MASLNENQK	MASLNENQK	0	9	7.00	2535	2	2	0	0	6690702	53886		178	2.1	y3y5y5	112790	938	115849685671389	758496856713894	0.1140	Yellow	2583	10345229	10345261	158559	3987	3987.00	2.00	2
0	NCDO2118_RS00005	chromosomal replication initiator protein DnaA 575:1942 forward MW:51461	Regular	3657241	0.84	514610558	23	5	40	14.29	34966	26870	9147	0	5	Pass2	VarMod	Phosphoryl STY(4)	19578327	YVSSENFVNDYVNATR	YVSSENFVNDYVNATR	185	16	4.07	2534	2	2	0	0	2580161	49748		847	2.2	b13-H3PO4y6y9y13y16	245273	1674	170449842120481	130449842120481	0.0715	Yellow	14425	19578332	19578327	265184	2499	2499.00	2.00	2
0	NCDO2118_RS00005	chromosomal replication initiator protein DnaA 575:1942 forward MW:51461	Regular	3657241	0.84	514610558	23	5	40	14.29	34966	26870	9147	0	6	Pass2	InSource	None	5913097	LTSDR	GSQIVLTSDR	251	5	7.00	2532	1	1	0	0	698322	0.0000		620	0.0	y5	183793	529	790794091087325	118158818217465	0.0460	Green	3001	5913103	5913121	163249	1610	1610.00	1.00	1
0	NCDO2118_RS00005	chromosomal replication initiator protein DnaA 575:1942 forward MW:51461	Regular	4408409	0.85	514610558	28	10	40	17.14	85245	48399	12075	1	1	Pass1	PepFrag1	None	16408279	QSDLITTAGFEVFGR	QSDLITTAGFEVFGR	59	15	4.07	1512	1	1	0	0	1625574	48553		1673	5.4	b8y15	323063	1507	158916308824543	118916308824543	0.3760	Red	10614	16408173	16408175	302999	32048	32048.00	2.00	2
0	NCDO2118_RS00005	chromosomal replication initiator protein DnaA 575:1942 forward MW:51461	Regular	4408409	0.85	514610558	28	10	40	17.14	85245	48399	12075	0	2	Pass1	PepFrag1	None	11736474	VTELAQQSIGK	VTELAQQSIGK	13	11	7.00	1509	12	12	8	3	172900300	68821		3611	3.6	b2b2b3b3b4b11y2y4y5y5*y6y6*y6y7y8y9y9y10	176362	1106	129299363058093	892993630580926	0.1613	Green	1202	11736465	11736487	156483	13748	13748.00	2.00	2
0	NCDO2118_RS00005	chromosomal replication initiator protein DnaA 575:1942 forward MW:51461	Regular	4408409	0.85	514610558	28	10	40	17.14	85245	48399	12075	0	3	Pass1	PepFrag1	None	22391241	LEFPSETLSYIAGQIDSNVR	LEFPSETLSYIAGQIDSNVR	300	20	3.83	1510	1	1	0	0	827251	45619	Missing	93	2.4	b11y7*	326031	2061	195799522665613	905330151104089	0.0305	Red	8632	22391254	22391277	275154	2603	2603.00	3.00	3
0	NCDO2118_RS00005	chromosomal replication initiator protein DnaA 575:1942 forward MW:51461	Regular	4408409	0.85	514610558	28	10	40	17.14	85245	48399	12075	0	4	Pass2	PepFrag2	None	14177645	NATQQSLSNLTIK	NATQQSLSNLTIK	354	13	10.10	1514	2	2	0	0	1375742	47828		86	4.1	b6b9	218923	1326	145922406601142	572816044007611	0.1980	Red	5014	14177732	14177762	227424	16877	16877.00	2.84	3
0	NCDO2118_RS00005	chromosomal replication initiator protein DnaA 575:1942 forward MW:51461	Regular	4408409	0.85	514610558	28	10	40	17.14	85245	48399	12075	0	5	Pass2	PepFrag2	None	5793038	FWAR	FWAR	9	4	11.05	1518	2	2	0	0	632099	44451		242	0.0	b3y4	162161	513	774767172322126	114953434464425	0.0224	Red	3090	5793133	5793151	199135	1907	1907.00	1.00	1
0	NCDO2118_RS00005	chromosomal replication initiator protein DnaA 575:1942 forward MW:51461	Regular	4408409	0.85	514610558	28	10	40	17.14	85245	48399	12075	0	6	Pass2	PepFrag2	None	16599064	ELLGTSLPAIGTAFGGR	ELLGTSLPAIGTAFGGR	405	17	7.00	1515	1	1	0	0	788767	45412	Missing	35	1.9	y8	308431	1563	162829198900762	122829198900762	0.0185	Red	12747	16598897	16598898	335467	1576	1576.00	2.00	2
0	NCDO2118_RS00005	chromosomal replication initiator protein DnaA 575:1942 forward MW:51461	Regular	4408409	0.85	514610558	28	10	40	17.14	85245	48399	12075	0	7	Pass2	PepFrag2	None	10344935	MASLNENQK	MASLNENQK	0	9	7.00	1511	1	1	0	0	1522413	48268		144	1.4	y4y8	121737	938	115849685671389	758496856713894	0.0158	Red	2159	10345005	10345031	183337	1343	1343.00	2.00	2
0	NCDO2118_RS00005	chromosomal replication initiator protein DnaA 575:1942 forward MW:51461	Regular	4408409	0.85	514610558	28	10	40	17.14	85245	48399	12075	0	8	Pass2	PepFrag2	None	21030764	THLMHAIGNQILTDNPTAR	THLMHAIGNQILTDNPTAR	164	19	8.01	1513	1	1	0	0	814223	45550	Missing	411	1.7	b1y16	277865	1952	188833703034377	858891353562511	0.0132	Red	11271	21030803	21030829	311503	1129	1129.00	3.00	3
0	NCDO2118_RS00005	chromosomal replication initiator protein DnaA 575:1942 forward MW:51461	Regular	4408409	0.85	514610558	28	10	40	17.14	85245	48399	12075	0	9	Pass2	MissedCleavage	None	17998633	DHTTVMYAYKQISDK	DHTTVMYAYKQISDK	422	15	7.67	1517	4	4	0	0	7558911	55227		5304	3.1	b11b13b15*y1y15	210554	1645	168475557585787	128475557585787	0.0823	Yellow	4101	17998584	17998575	215302	7019	7019.00	2.25	2
0	NCDO2118_RS00005	chromosomal replication initiator protein DnaA 575:1942 forward MW:51461	Regular	4408409	0.85	514610558	28	10	40	17.14	85245	48399	12075	0	10	Pass2	MissedCleavage	None	20379552	EGTKNEFFNTFNALYDK	EGTKNEFFNTFNALYDK	229	17	4.44	1516	3	3	0	0	6601353	54639		476	3.3	b2b7*b7b17y1y6*y9*y16	294278	1838	181408085038258	141408085038258	0.0821	Yellow	11987	20379606	20379577	322732	6995	6995.00	2.07	2
0	NCDO2118_RS00005	chromosomal replication initiator protein DnaA 575:1942 forward MW:51461	Regular	3528605	0.93	514610558	14	3	40	5.49	23429	42399	8186	1	1	Pass1	PepFrag1	None	10755742	GSQIVLTSDR	GSQIVLTSDR	246	10	7.00	2192	9	9	4	2	160551500	67532		5685	3.5	b3b3b5y1y3y4y5y5y6y6y7y8*y10	186248	993	120335139710428	803351397104284	0.6032	Green	3123	10755702	10755724	164206	14133	14133.00	1.95	2
0	NCDO2118_RS00005	chromosomal replication initiator protein DnaA 575:1942 forward MW:51461	Regular	3528605	0.93	514610558	14	3	40	5.49	23429	42399	8186	0	2	Pass2	VarMod	Phosphoryl STY(4)	19578327	YVSSENFVNDYVNATR	YVSSENFVNDYVNATR	185	16	4.07	2193	1	1	0	0	944197	45227		2034	3.2	y11y13y16	253753	1674	170449842120481	130449842120481	0.3126	Red	14026	19578308	19578276	269166	7325	7325.00	2.00	2
0	NCDO2118_RS00005	chromosomal replication initiator protein DnaA 575:1942 forward MW:51461	Regular	3528605	0.93	514610558	14	3	40	5.49	23429	42399	8186	0	3	Pass2	VarMod	Phosphoryl STY(*)	18798296	DHTTVMYAYKQISDK	DHTTVMYAYKQISDK	422	15	7.67	2194	2	2	0	0	3583760	51019		126	1.6	b12b12y10	193185	1645	168475557585787	128475557585787	0.0451	Yellow	9096	18798345	18798320	219462	1057	1057.00	2.00	2
0	NCDO2118_RS00005	chromosomal replication initiator protein DnaA 575:1942 forward MW:51461	Regular	3528605	0.93	514610558	14	3	40	5.49	23429	42399	8186	0	4	Pass2	InSource	None	5913097	LTSDR	GSQIVLTSDR	251	5	7.00	2192	2	2	0	0	867171	0.0000		341	0.0	b5y5	186248	529	790794091087325	118158818217465	0.0390	Green	3116	5913081	5913096	164143	914	914.00	1.00	1
0	NCDO2118_RS00005	chromosomal replication initiator protein DnaA 575:1942 forward MW:51461	Regular	2884062	1.2	514610558	12	8	40	12.31	23322	16987	6541	1	1	Pass1	PepFrag1	None	10755742	GSQIVLTSDR	GSQIVLTSDR	246	10	7.00	2294	8	8	4	2	117410200	65297		5733	3.5	b3b3b5y3y4y5y5y6y6y7y8*y8y10	184776	993	120335139710428	803351397104284	0.6068	Green	2542	10755700	10755729	163266	14151	14151.00	1.95	2
0	NCDO2118_RS00005	chromosomal replication initiator protein DnaA 575:1942 forward MW:51461	Regular	2884062	1.2	514610558	12	8	40	12.31	23322	16987	6541	0	2	Pass1	PepFrag1	None	28694553	ELLGTSLPAIGTAFGGRDHTTVMYAYK	ELLGTSLPAIGTAFGGRDHTTVMYAYK	405	27	7.71	2296	0	0	0	0	1036180	44754	Missing	37	2.2	b5	331212	2671	232742427419337	530969709677349	0.0625	Red	11419	28694604	28694604	259031	1458	1458.00	5.00	5
0	NCDO2118_RS00005	chromosomal replication initiator protein DnaA 575:1942 forward MW:51461	Regular	2884062	1.2	514610558	12	8	40	12.31	23322	16987	6541	0	3	Pass1	PepFrag1	None	23671173	MIDYELYANDELTELELHR	MIDYELYANDELTELELHR	74	19	3.82	2295	1	1	0	0	3911722	50524		156	1.9	y14y14	354817	2166	202394451467605	949296343117369	0.0591	Yellow	15687	23671197	23671188	346265	1378	1378.00	3.00	3
0	NCDO2118_RS00005	chromosomal replication initiator protein DnaA 575:1942 forward MW:51461	Regular	2884062	1.2	514610558	12	8	40	12.31	23322	16987	6541	0	4	Pass2	PepFrag2	None	10344935	MASLNENQK	MASLNENQK	0	9	7.00	2300	1	1	0	0	1756127	47046		219	1.7	b9*y5y5	111195	938	115849685671389	758496856713894	0.0987	Red	2181	10345250	10345279	158534	2303	2303.00	2.00	2
0	NCDO2118_RS00005	chromosomal replication initiator protein DnaA 575:1942 forward MW:51461	Regular	2884062	1.2	514610558	12	8	40	12.31	23322	16987	6541	0	5	Pass2	PepFrag2	None	20059614	YVSSENFVNDYVNATRK	YVSSENFVNDYVNATRK	185	17	6.89	2301	0	0	0	0	1178892	45315		151	1.8	b14*y10*	236033	1809	179494858110877	139494858110877	0.0554	Red	11996	20059110	20059101	266382	1292	1292.00	2.00	2
0	NCDO2118_RS00005	chromosomal replication initiator protein DnaA 575:1942 forward MW:51461	Regular	2884062	1.2	514610558	12	8	40	12.31	23322	16987	6541	0	6	Pass2	MissedCleavage	None	17998633	DHTTVMYAYKQISDK	DHTTVMYAYKQISDK	422	15	7.67	2297	0	0	0	0	1732956	46988		68	1.6	b13y13	189424	1645	168475557585787	128475557585787	0.0476	Red	7123	17998615	17998619	211684	1109	1109.00	2.00	2
0	NCDO2118_RS00005	chromosomal replication initiator protein DnaA 575:1942 forward MW:51461	Regular	2884062	1.2	514610558	12	8	40	12.31	23322	16987	6541	0	7	Pass2	VarMod	Phosphoryl STY(11)	17869074	EIAFPRQIAMYLVR	EIAFPRQIAMYLVR	391	14	9.84	2299	0	0	0	0	1616627	46686	Identified	74	1.4	b7*y10*	330826	1620	166764258677485	126764258677485	0.0356	Red	10912	17869172	17869177	252956	831	831.00	2.00	2
0	NCDO2118_RS00005	chromosomal replication initiator protein DnaA 575:1942 forward MW:51461	Regular	2884062	1.2	514610558	12	8	40	12.31	23322	16987	6541	0	8	Pass2	VarMod	Oxidation M(3)	15367210	NDMDVQKDIDSIK	NDMDVQKDIDSIK	439	13	3.87	2298	2	2	0	0	1006701	44629		103	1.3	b7b7*y4	207831	1394	150869511231425	110869511231425	0.0343	Red	9254	15367112	15367129	232512	800	800.00	2.37	2
0	NCDO2118_RS00005	chromosomal replication initiator protein DnaA 575:1942 forward MW:51461	Regular	2414622	1.34	514610558	20	9	40	9.89	28756	11554	4886	1	1	Pass1	PepFrag1	None	10755742	GSQIVLTSDR	GSQIVLTSDR	246	10	7.00	1858	8	8	3	3	80032070	62861		2478	2.7	b3b3b6b9y1y4y5y6y7	186822	993	120335139710428	803351397104284	0.2434	Green	2075	10755732	10755765	163904	6998	6998.00	2.00	2
0	NCDO2118_RS00005	chromosomal replication initiator protein DnaA 575:1942 forward MW:51461	Regular	2414622	1.34	514610558	20	9	40	9.89	28756	11554	4886	0	2	Pass1	PepFrag1	None	11736474	VTELAQQSIGK	VTELAQQSIGK	13	11	7.00	1857	5	5	4	0	22675830	57384		858	2.2	b3b8*y6y7y8y9y10	165408	1106	129299363058093	892993630580926	0.1280	Green	1608	11736453	11736484	156290	3681	3681.00	2.00	2
0	NCDO2118_RS00005	chromosomal replication initiator protein DnaA 575:1942 forward MW:51461	Regular	2414622	1.34	514610558	20	9	40	9.89	28756	11554	4886	0	3	Pass1	PepFrag1	None	12285667	DHTTVMYAYK	DHTTVMYAYK	422	10	7.68	1859	1	1	0	0	1931797	46688		80	1.3	b5b8	156206	1108	129455192383322	89455192383322	0.0304	Red	4467	12285614	12285644	195065	875	875.00	2.00	2
0	NCDO2118_RS00005	chromosomal replication initiator protein DnaA 575:1942 forward MW:51461	Regular	2414622	1.34	514610558	20	9	40	9.89	28756	11554	4886	0	4	Pass2	PepFrag2	None	10344935	MASLNENQK	MASLNENQK	0	9	7.00	1864	2	2	0	0	2658300	48075		915	2.8	b5y7y9y9*	120881	938	115849685671389	758496856713894	0.2953	Yellow	3780	10345029	10345064	186880	8491	8491.00	2.00	2
0	NCDO2118_RS00005	chromosomal replication initiator protein DnaA 575:1942 forward MW:51461	Regular	2414622	1.34	514610558	20	9	40	9.89	28756	11554	4886	0	5	Pass2	PepFrag2	None	16408279	QSDLITTAGFEVFGR	QSDLITTAGFEVFGR	59	15	4.07	1865	1	1	0	0	377023	39592		53	2.1	b8	322601	1507	158916308824543	659442058830284	0.0833	Red	10980	16407727	16407749	272364	2396	2396.00	3.00	3
0	NCDO2118_RS00005	chromosomal replication initiator protein DnaA 575:1942 forward MW:51461	Regular	2414622	1.34	514610558	20	9	40	9.89	28756	11554	4886	0	6	Pass2	MissedCleavage	None	17998633	DHTTVMYAYKQISDK	DHTTVMYAYKQISDK	422	15	7.67	1860	0	0	0	0	3094272	48734		70	1.7	y7	198724	1645	168475557585787	128475557585787	0.0465	Yellow	5988	17998599	17998592	211743	1338	1338.00	2.00	2
0	NCDO2118_RS00005	chromosomal replication initiator protein DnaA 575:1942 forward MW:51461	Regular	2414622	1.34	514610558	20	9	40	9.89	28756	11554	4886	0	7	Pass2	VarMod	Phosphoryl STY(22)	28653302	SESSRLEFPSETLSYIAGQIDSNVR	SESSRLEFPSETLSYIAGQIDSNVR	295	25	4.16	1862	1	1	0	0	923087	43481	Missing	128	2.4	b10y8y10-H3PO4	332515	2537	224891623170823	109927748780549	0.0750	Red	14632	28653306	28653254	374775	2158	2158.00	2.89	3
0	NCDO2118_RS00005	chromosomal replication initiator protein DnaA 575:1942 forward MW:51461	Regular	2414622	1.34	514610558	20	9	40	9.89	28756	11554	4886	0	8	Pass2	VarMod	Phosphoryl STY(11)	17869074	EIAFPRQIAMYLVR	EIAFPRQIAMYLVR	391	14	9.84	1863	2	2	0	0	1960109	46751	Missing	219	1.7	b3b11	333212	1620	166764258677485	126764258677485	0.0526	Red	9500	17869117	17869112	253244	1512	1512.00	2.00	2
0	NCDO2118_RS00005	chromosomal replication initiator protein DnaA 575:1942 forward MW:51461	Regular	2414622	1.34	514610558	20	9	40	9.89	28756	11554	4886	0	9	Pass2	VarMod	Phosphoryl STY(*)	19578327	YVSSENFVNDYVNATR	YVSSENFVNDYVNATR	185	16	4.07	1861	0	0	0	0	605310	41648		85	1.7	b4b6*	261320	1674	170449842120481	130449842120481	0.0455	Red	10557	19578215	19578193	266330	1307	1307.00	2.00	2
0	NCDO2118_RS00005	chromosomal replication initiator protein DnaA 575:1942 forward MW:51461	Regular	2947793	1.75	514610558	19	9	40	7.03	71231	15918	7296	1	1	Pass1	PepFrag1	None	10755742	GSQIVLTSDR	GSQIVLTSDR	246	10	7.00	1464	4	4	3	0	38266030	60523		1877	2.9	b3y4y5y5y6y7y8*y9*	188027	993	120335139710428	803351397104284	0.1254	Green	2865	10755712	10755735	163862	8935	8935.00	2.00	2
0	NCDO2118_RS00005	chromosomal replication initiator protein DnaA 575:1942 forward MW:51461	Regular	2947793	1.75	514610558	19	9	40	7.03	71231	15918	7296	0	2	Pass1	PepFrag1	None	13406805	IPQELNNLEDR	IPQELNNLEDR	256	11	3.83	1466	7	7	4	0	77803510	63605	Identified	3621	2.7	b4y5y6y8y9y10y11y11*	221351	1225	13841517091563	984151709156301	0.0872	Green	6375	13406796	13406815	202097	6213	6213.00	2.00	2
0	NCDO2118_RS00005	chromosomal replication initiator protein DnaA 575:1942 forward MW:51461	Regular	2947793	1.75	514610558	19	9	40	7.03	71231	15918	7296	0	3	Pass1	PepFrag1	None	14456114	NQMENFENTYR	NQMENFENTYR	202	11	4.26	1465	3	3	0	0	5832911	52354		231	1.2	b5y7y9y10	192463	1261	141113866590153	101113866590153	0.0108	Yellow	5607	14456152	14456169	194267	770	770.00	2.00	2
0	NCDO2118_RS00005	chromosomal replication initiator protein DnaA 575:1942 forward MW:51461	Regular	2947793	1.75	514610558	19	9	40	7.03	71231	15918	7296	0	4	Pass2	PepFrag2	None	10344935	MASLNENQK	MASLNENQK	0	9	7.00	1472	1	1	0	0	428847	41018		42	4.3	b5	116306	938	115849685671389	758496856713894	0.3970	Red	1811	10345190	10345213	148562	28280	28280.00	1.98	2
0	NCDO2118_RS00005	chromosomal replication initiator protein DnaA 575:1942 forward MW:51461	Regular	2947793	1.75	514610558	19	9	40	7.03	71231	15918	7296	0	5	Pass2	PepFrag2	None	20059614	YVSSENFVNDYVNATRK	YVSSENFVNDYVNATRK	185	17	6.89	1471	1	1	0	0	735486	43361		46	3.1	b15	232298	1809	179494858110877	139494858110877	0.0885	Red	11315	20059849	20059843	263641	6304	6304.00	2.00	2
0	NCDO2118_RS00005	chromosomal replication initiator protein DnaA 575:1942 forward MW:51461	Regular	2947793	1.75	514610558	19	9	40	7.03	71231	15918	7296	0	6	Pass2	PepFrag2	None	32745646	QAYDFFIEPAQLMSVEQDTANILLDSGMK	QAYDFFIEPAQLMSVEQDTANILLDSGMK	24	29	3.43	1470	0	0	0	0	766280	43539	Missing	49	2.9	y13*	443627	3026	252933051347924	12862203423195	0.0419	Red	14900	32745073	32744986	366346	2988	2988.00	3.00	3
0	NCDO2118_RS00005	chromosomal replication initiator protein DnaA 575:1942 forward MW:51461	Regular	2947793	1.75	514610558	19	9	40	7.03	71231	15918	7296	0	7	Pass2	VarMod	Phosphoryl STY(3)	16747458	MASLNENQKFWAR	MASLNENQKFWAR	0	13	10.12	1468	1	1	0	0	547346	42078		693	3.2	b8-H3PO4b13y7*	257127	1451	154954636584765	114954636584765	0.1267	Red	7035	16747327	16747337	209611	9023	9023.00	2.00	2
0	NCDO2118_RS00005	chromosomal replication initiator protein DnaA 575:1942 forward MW:51461	Regular	2947793	1.75	514610558	19	9	40	7.03	71231	15918	7296	0	8	Pass2	VarMod	Oxidation M(3)	15367210	NDMDVQKDIDSIK	NDMDVQKDIDSIK	439	13	3.87	1467	1	1	0	0	724954	43298		481	2.9	b1y8	200620	1394	150869511231425	60579674154283	0.0970	Red	2351	15367216	15367236	156896	6912	6912.00	2.89	3
0	NCDO2118_RS00005	chromosomal replication initiator protein DnaA 575:1942 forward MW:51461	Regular	2947793	1.75	514610558	19	9	40	7.03	71231	15918	7296	0	9	Pass2	VarMod	Phosphoryl STY(*)	18798296	DHTTVMYAYKQISDK	DHTTVMYAYKQISDK	422	15	7.67	1469	1	1	0	0	1413630	46198		256	1.9	b11y10	173419	1645	168475557585787	128475557585787	0.0254	Red	7874	18798332	18798333	219040	1806	1806.00	2.00	2
0	NCDO2118_RS00005	chromosomal replication initiator protein DnaA 575:1942 forward MW:51461	Regular	1641589	2.06	514610558	17	6	40	6.81	25177	28239	3577	1	1	Pass1	PepFrag1	None	22391241	LEFPSETLSYIAGQIDSNVR	LEFPSETLSYIAGQIDSNVR	300	20	3.83	3031	4	4	0	0	3818116	47971	Missing	1117	4.0	b5b14*b19y4*y8y8*y11y13y18y20*	332991	2061	195799522665613	905330151104089	0.4034	Red	12136	22391301	22391306	276067	10156	10156.00	2.88	3
0	NCDO2118_RS00005	chromosomal replication initiator protein DnaA 575:1942 forward MW:51461	Regular	1641589	2.06	514610558	17	6	40	6.81	25177	28239	3577	0	2	Pass1	PepFrag1	None	11736474	VTELAQQSIGK	VTELAQQSIGK	13	11	7.00	3030	9	9	4	2	57878810	59778		1810	3.0	b2b3b3b11y2y4y5*y7y8y9y10	179126	1106	129299363058093	892993630580926	0.3444	Green	1703	11736451	11736475	156672	8670	8670.00	2.00	2
0	NCDO2118_RS00005	chromosomal replication initiator protein DnaA 575:1942 forward MW:51461	Regular	1641589	2.06	514610558	17	6	40	6.81	25177	28239	3577	0	3	Pass2	PepFrag2	None	16599064	ELLGTSLPAIGTAFGGR	ELLGTSLPAIGTAFGGR	405	17	7.00	3032	1	1	0	0	1993754	45149	Missing	34	2.3	y7	318185	1563	162829198900762	685527992671744	0.1020	Red	18295	16598934	16598981	349844	2568	2568.00	3.00	3
0	NCDO2118_RS00005	chromosomal replication initiator protein DnaA 575:1942 forward MW:51461	Regular	1641589	2.06	514610558	17	6	40	6.81	25177	28239	3577	0	4	Pass2	MissedCleavage	None	20379552	EGTKNEFFNTFNALYDK	EGTKNEFFNTFNALYDK	229	17	4.44	3034	1	1	0	0	1323368	43369		500	2.1	b9*b15*y15	298182	1838	181408085038258	141408085038258	0.0828	Red	16448	20379576	20379539	323106	2085	2085.00	2.00	2
0	NCDO2118_RS00005	chromosomal replication initiator protein DnaA 575:1942 forward MW:51461	Regular	1641589	2.06	514610558	17	6	40	6.81	25177	28239	3577	0	5	Pass2	MissedCleavage	None	15947795	MASLNENQKFWAR	MASLNENQKFWAR	0	13	10.12	3033	0	0	0	0	1597407	44187		37	1.4	y10*	229927	1451	154954636584765	114954636584765	0.0337	Red	6405	15947671	15947674	219278	849	849.00	2.00	2
0	NCDO2118_RS00005	chromosomal replication initiator protein DnaA 575:1942 forward MW:51461	Regular	1641589	2.06	514610558	17	6	40	6.81	25177	28239	3577	0	6	Pass2	VarMod	Phosphoryl STY(*)	20528950	FSWGLTTDITAPDYETR	FSWGLTTDITAPDYETR	271	17	3.70	3035	2	2	0	0	2377686	45914	Missing	79	1.5	b3y4	311554	1776	177305255413104	486526277065522	0.0337	Red	15448	20528896	20528896	311527	849	849.00	4.00	4
1	NCDO2118_RS00010	DNA polymerase III subunit beta 2099:3241 forward MW:42264	Regular	13150250	0	422643292	20	5	25	11.58	95269	135220.5	49084	1	1	Pass1	PepFrag1	None	11566460	LLPLEDSELK	LLPLEDSELK	188	10	3.83	1065	12	12	10	2	498767200	78168	Identified	47871	6.7	b2b3y1y2y3y4y5y6y7y8y8y9y10	262674	1103	129065442828005	890654428280055	0.9192	Green	12750	11566416	11566435	255187	87569	87569.00	1.97	2
1	NCDO2118_RS00010	DNA polymerase III subunit beta 2099:3241 forward MW:42264	Regular	13150250	0	422643292	20	5	25	11.58	95269	135220.5	49084	0	2	Pass1	PepFrag1	None	9464993	NFLPVDNK	NFLPVDNK	55	8	6.78	1066	0	0	0	0	779258	50106	Missing	58	1.7	y4*	194862	872	110349564655678	703495646556783	0.0271	Yellow	7361	9464923	9464947	205503	2578	2578.00	2.00	2
1	NCDO2118_RS00010	DNA polymerase III subunit beta 2099:3241 forward MW:42264	Regular	13150250	0	422643292	20	5	25	11.58	95269	135220.5	49084	0	3	Pass2	PepFrag2	None	11325269	NETISYYSR	NETISYYSR	234	9	6.84	1069	0	0	0	0	354472	46685		118	1.3	b5*y9*	153992	998	120738746218848	807387462188479	0.0113	Red	10166	11324789	11324809	227374	1076	1076.00	1.61	2
1	NCDO2118_RS00010	DNA polymerase III subunit beta 2099:3241 forward MW:42264	Regular	13150250	0	422643292	20	5	25	11.58	95269	135220.5	49084	0	4	Pass2	VarMod	Phosphoryl STY(3);Phosphoryl STY(9)	17348128	FISNVRPFTLQPR	FISNVRPFTLQPR	351	13	12.40	1067	3	3	0	0	3827210	57018	Identified	398	1.9	b9-H3PO4b10b11*b11-H3PO4y4y11y12-2(H3PO4)	261667	1475	156658626443963	644390842959755	0.0225	Green	9393	17347974	17347986	221873	2139	2139.00	2.76	3
1	NCDO2118_RS00010	DNA polymerase III subunit beta 2099:3241 forward MW:42264	Regular	13150250	0	422643292	20	5	25	11.58	95269	135220.5	49084	0	5	Pass2	VarMod	Phosphoryl STY(2)	16027788	FSINKNAFQNALR	FSINKNAFQNALR	3	13	11.49	1068	2	2	0	0	2987478	55942		130	1.3	b6y1y10*	228830	1410	152021743589642	112021743589642	0.0081	Green	14327	16027852	16027849	273364	770	770.00	2.53	2
1	NCDO2118_RS00010	DNA polymerase III subunit beta 2099:3241 forward MW:42264	Regular	13150250	0	422643292	20	5	25	11.58	95269	135220.5	49084	0	6	Pass2	InSource	None	7203410	EDSELK	LLPLEDSELK	192	6	3.83	1065	3	3	0	0	1393327	0.0000		509	0.0	b6y2y6	262674	641	898803980730476	139760796146095	0.0119	Green	12737	7203450	7203464	255125	1137	1137.00	1.00	1
1	NCDO2118_RS00010	DNA polymerase III subunit beta 2099:3241 forward MW:42264	Regular	6377021	0	422643292	30	6	25	23.95	48814	30000	13225	1	1	Pass1	PepFrag1	None	11566460	LLPLEDSELK	LLPLEDSELK	188	10	3.83	1799	5	5	2	0	67194340	66320	Identified	5542	3.6	y2y4y6y7y8	267224	1103	129065442828005	890654428280055	0.3221	Green	9960	11566431	11566455	253436	15722	15722.00	2.00	2
1	NCDO2118_RS00010	DNA polymerase III subunit beta 2099:3241 forward MW:42264	Regular	6377021	0	422643292	30	6	25	23.95	48814	30000	13225	0	2	Pass1	PepFrag1	None	9464993	NFLPVDNK	NFLPVDNK	55	8	6.78	1798	7	7	5	2	212502700	71320	Identified	3593	3.1	b2b3b3*b5*y2y3y4y5y5*y6	200264	872	110349564655678	703495646556783	0.2741	Green	5109	9464946	9464975	205028	13382	13382.00	1.94	2
1	NCDO2118_RS00010	DNA polymerase III subunit beta 2099:3241 forward MW:42264	Regular	6377021	0	422643292	30	6	25	23.95	48814	30000	13225	0	3	Pass1	PepFrag1	None	12646168	LIEGSYPDTNR	LIEGSYPDTNR	243	11	4.07	1797	1	1	0	0	4663943	54734	Missing	259	1.3	y8*y9	159397	1137	131704296833136	91704296833136	0.0184	Yellow	1751	12646101	12646121	157942	896	896.00	2.00	2
1	NCDO2118_RS00010	DNA polymerase III subunit beta 2099:3241 forward MW:42264	Regular	6377021	0	422643292	30	6	25	23.95	48814	30000	13225	0	4	Pass2	VarMod	Phosphoryl STY(20)	36027414	LIEGSYPDTNRLIPNEADYTLDLVFDAAQLR	LIEGSYPDTNRLIPNEADYTLDLVFDAAQLR	243	31	3.69	1801	9	9	0	0	5878893	55739	Identified	2442	4.9	b9b10*b12b19b27-H3PO4b28y7y7*y9*y10y12-H3PO4y13-H3PO4y14y17y18y25-H3PO4y31	386830	3262	265918736551367	929593682756834	0.2396	Yellow	18475	36027598	36027598	352411	11697	11697.00	3.63	4
1	NCDO2118_RS00010	DNA polymerase III subunit beta 2099:3241 forward MW:42264	Regular	6377021	0	422643292	30	6	25	23.95	48814	30000	13225	0	5	Pass2	VarMod	Phosphoryl STY(*)	29534442	SEITLKGLDSEIYPHLQEISEGSSLK	SEITLKGLDSEIYPHLQEISEGSSLK	110	26	4.35	1800	1	1	0	0	1898032	50829	Identified	445	2.3	b17b13-H3PO4	340345	2682	233380992913225	115587328608817	0.0375	Yellow	16637	29534547	29534458	325482	1831	1831.00	3.00	3
1	NCDO2118_RS00010	DNA polymerase III subunit beta 2099:3241 forward MW:42264	Regular	6377021	0	422643292	30	6	25	23.95	48814	30000	13225	0	6	Pass2	VarMod	Phosphoryl STY(11)	18838899	NEESGFVQLITPVRTN	NEESGFVQLITPVRTN	364	16	4.26	1802	1	1	0	0	4979193	55018	Identified	99	1.6	b10*y5*y7	300947	1662	169634290687124	730895271247495	0.0233	Yellow	4257	18838862	18838897	195584	1139	1139.00	3.00	3
1	NCDO2118_RS00010	DNA polymerase III subunit beta 2099:3241 forward MW:42264	Regular	6377021	0	422643292	30	6	25	23.95	48814	30000	13225	0	7	Pass2	InSource	None	5723039	PVDNK	NFLPVDNK	58	5	6.78	1798	6	6	4	1	121363600	0.0000	Identified	845	0.0	b2b3b4b5*y3y4y5	200264	517	778789336328781	115757867265756	0.0850	Green	5112	5723043	5723059	205056	4147	4147.00	1.00	1
1	NCDO2118_RS00010	DNA polymerase III subunit beta 2099:3241 forward MW:42264	Regular	19331470	0	422643292	50	12	25	32.89	102482	74770	34456	1	1	Pass1	PepFrag1	None	21220703	EGNDLAISFNPEYLIDALK	EGNDLAISFNPEYLIDALK	322	19	3.59	2408	18	18	12	5	254344300	76917	Identified	13867	5.9	b4b4b5b5*b5b6b6*b6b7b7*b7b8b8b10*y1y3y4y6y7y9y10y11y12y13y14y15y16*y19	419114	1968	189864176634406	149864176634406	0.3135	Green	45304	21220755	21220732	439381	32123	32123.00	2.08	2
1	NCDO2118_RS00010	DNA polymerase III subunit beta 2099:3241 forward MW:42264	Regular	19331470	0	422643292	50	12	25	32.89	102482	74770	34456	0	2	Pass1	PepFrag1	None	22771761	LIPNEADYTLDLVFDAAQLR	LIPNEADYTLDLVFDAAQLR	254	20	3.50	2407	12	12	5	2	107951900	73195	Identified	6133	5.3	b2b5b12b13*b16*y1y3y4y4*y5y6y7y8y11y12y13y18y19*	425952	2125	199832255582891	932215037219275	0.2231	Green	45206	22771809	22771810	438510	22860	22860.00	2.67	3
1	NCDO2118_RS00010	DNA polymerase III subunit beta 2099:3241 forward MW:42264	Regular	19331470	0	422643292	50	12	25	32.89	102482	74770	34456	0	3	Pass1	PepFrag1	None	8455091	QVLLTSGK	QVLLTSGK	102	8	10.10	2406	5	5	2	2	31160040	67799		3446	3.6	b2b3y5y6y8	155800	816	105573051186756	171146102373512	0.1931	Green	3660	8455077	8455097	211822	19787	19787.00	1.53	1
1	NCDO2118_RS00010	DNA polymerase III subunit beta 2099:3241 forward MW:42264	Regular	19331470	0	422643292	50	12	25	32.89	102482	74770	34456	0	4	Pass1	PepFrag1	None	9185295	FDVILPSK	FDVILPSK	198	8	6.78	2409	0	0	0	0	2686344	57154	Identified	41	1.9	y3	236882	877	110770988111791	181541976223582	0.0331	Yellow	21395	9185327	9185346	306816	3389	3389.00	1.00	1
1	NCDO2118_RS00010	DNA polymerase III subunit beta 2099:3241 forward MW:42264	Regular	19331470	0	422643292	50	12	25	32.89	102482	74770	34456	0	5	Pass2	PepFrag2	None	12777133	LLTVMTTNGTVK	LLTVMTTNGTVK	281	12	10.10	2410	2	2	0	0	1632813	54992		3222	1.8	b6b12y10y10	226242	1233	139017140768438	990171407684379	0.0201	Yellow	20581	12777245	12777264	303718	2058	2058.00	2.00	2
1	NCDO2118_RS00010	DNA polymerase III subunit beta 2099:3241 forward MW:42264	Regular	19331470	0	422643292	50	12	25	32.89	102482	74770	34456	0	6	Pass2	PepFrag2	None	22020925	GLDSEIYPHLQEISEGSSLK	GLDSEIYPHLQEISEGSSLK	116	20	4.16	2416	2	2	0	0	2775416	57296	Identified	258	1.7	b13*b16y13y14y17*	327465	2024	193449067074994	153449067074994	0.0098	Yellow	41851	22020780	22020752	405514	1007	1007.00	2.00	2
1	NCDO2118_RS00010	DNA polymerase III subunit beta 2099:3241 forward MW:42264	Regular	19331470	0	422643292	50	12	25	32.89	102482	74770	34456	0	7	Pass2	PepFrag2	None	11566460	LLPLEDSELK	LLPLEDSELK	188	10	3.83	2417	0	0	0	0	850573	52160	Missing	63	1.3	b9y9	275500	1103	129065442828005	218130885656011	0.0084	Red	8053	11566060	11566072	244034	864	864.00	1.00	1
1	NCDO2118_RS00010	DNA polymerase III subunit beta 2099:3241 forward MW:42264	Regular	19331470	0	422643292	50	12	25	32.89	102482	74770	34456	0	8	Pass2	MissedCleavage	None	18039236	NEESGFVQLITPVRTN	NEESGFVQLITPVRTN	364	16	4.26	2411	2	2	0	0	4986888	59841	Identified	703	1.8	b8*b10b10*b11*b11y10	311851	1662	169634290687124	730895271247495	0.0138	Yellow	22783	18039174	18039198	312845	1417	1417.00	2.59	3
1	NCDO2118_RS00010	DNA polymerase III subunit beta 2099:3241 forward MW:42264	Regular	19331470	0	422643292	50	12	25	32.89	102482	74770	34456	0	9	Pass2	VarMod	Oxidation M(1)	9965546	MIKFSINK	MIKFSINK	0	8	10.60	2413	3	3	0	0	2210645	56308		5763	2.9	b5b7y8	163919	946	116507457558411	193014915116823	0.1105	Yellow	15778	9965515	9965533	282980	11325	11325.00	1.00	1
1	NCDO2118_RS00010	DNA polymerase III subunit beta 2099:3241 forward MW:42264	Regular	19331470	0	422643292	50	12	25	32.89	102482	74770	34456	0	10	Pass2	VarMod	Phosphoryl STY(*)	15068291	QAIGSKVTIPALTK	QAIGSKVTIPALTK	19	14	10.60	2414	3	3	0	0	1844028	55520	Missing	728	2.7	b4b5-H3PO4b8*b11b12*y1y7y13-H3PO4	203845	1392	150725173010307	110725173010307	0.0489	Yellow	30067	15068204	15068216	342358	5012	5012.00	2.41	2
1	NCDO2118_RS00010	DNA polymerase III subunit beta 2099:3241 forward MW:42264	Regular	19331470	0	422643292	50	12	25	32.89	102482	74770	34456	0	11	Pass2	VarMod	Phosphoryl STY(5)	15968608	QVLLTSGKSEITLK	QVLLTSGKSEITLK	102	14	9.88	2415	2	2	0	0	1220667	53729		90	1.9	b5b7	252135	1474	156587812282011	116587812282011	0.0182	Red	49138	15968485	15968493	486809	1861	1861.00	2.00	2
1	NCDO2118_RS00010	DNA polymerase III subunit beta 2099:3241 forward MW:42264	Regular	19331470	0	422643292	50	12	25	32.89	102482	74770	34456	0	12	Pass2	VarMod	Oxidation M(5)	12937082	LLTVMTTNGTVK	LLTVMTTNGTVK	281	12	10.10	2412	1	1	0	0	1195485	53638		142	1.3	b5y4y11*	226242	1233	139017140768438	990171407684379	0.0076	Red	37835	12936997	12937016	377151	779	779.00	2.00	2
1	NCDO2118_RS00010	DNA polymerase III subunit beta 2099:3241 forward MW:42264	Regular	12905250	0	422643292	39	12	25	28.16	112835	91615	50493	1	1	Pass1	PepFrag1	None	11566460	LLPLEDSELK	LLPLEDSELK	188	10	3.83	1334	9	9	5	2	371696400	76810	Identified	44867	6.4	b2b3y2y4y6y6y7y7y8y8y9y10	264918	1103	129065442828005	890654428280055	0.6820	Green	13292	11566419	11566450	253783	76952	76952.00	1.96	2
1	NCDO2118_RS00010	DNA polymerase III subunit beta 2099:3241 forward MW:42264	Regular	12905250	0	422643292	39	12	25	28.16	112835	91615	50493	0	2	Pass1	PepFrag1	None	9464993	NFLPVDNK	NFLPVDNK	55	8	6.78	1332	6	6	3	2	126816700	72139	Identified	1936	2.8	b2b2*b3y2y3y3y5y5*y6y6	191080	872	110349564655678	703495646556783	0.0880	Green	7594	9464973	9465005	204258	9927	9927.00	1.91	2
1	NCDO2118_RS00010	DNA polymerase III subunit beta 2099:3241 forward MW:42264	Regular	12905250	0	422643292	39	12	25	28.16	112835	91615	50493	0	3	Pass1	PepFrag1	None	12777133	LLTVMTTNGTVK	LLTVMTTNGTVK	281	12	10.10	1333	3	3	0	0	2109797	54350		340	1.9	b8y8y12	211627	1233	139017140768438	990171407684379	0.0215	Yellow	12114	12777127	12777156	242786	2423	2423.00	2.00	2
1	NCDO2118_RS00010	DNA polymerase III subunit beta 2099:3241 forward MW:42264	Regular	12905250	0	422643292	39	12	25	28.16	112835	91615	50493	0	4	Pass1	PepFrag1	None	12646168	LIEGSYPDTNR	LIEGSYPDTNR	243	11	4.07	1331	2	2	0	0	6084233	58950	Identified	224	1.5	y5y9	166783	1137	131704296833136	91704296833136	0.0108	Green	2421	12646167	12646196	156975	1221	1221.00	2.00	2
1	NCDO2118_RS00010	DNA polymerase III subunit beta 2099:3241 forward MW:42264	Regular	12905250	0	422643292	39	12	25	28.16	112835	91615	50493	0	5	Pass2	PepFrag2	None	15748802	FISNVRPFTLQPR	FISNVRPFTLQPR	351	13	12.40	1341	3	3	1	0	4273847	57416	Missing	159	2.6	b7*y1y3y4	254597	1475	156658626443963	116658626443963	0.0420	Green	12760	15748318	15748336	248614	4736	4736.00	2.00	2
1	NCDO2118_RS00010	DNA polymerase III subunit beta 2099:3241 forward MW:42264	Regular	12905250	0	422643292	39	12	25	28.16	112835	91615	50493	0	6	Pass2	PepFrag2	None	6953723	SINSFK	SINSFK	206	6	10.10	1342	0	0	0	0	178740	43630		45	1.3	b3	123511	636	894123915508906	138824783101781	0.0152	Red	3191	6953457	6953476	165027	1712	1712.00	1.00	1
1	NCDO2118_RS00010	DNA polymerase III subunit beta 2099:3241 forward MW:42264	Regular	12905250	0	422643292	39	12	25	28.16	112835	91615	50493	0	7	Pass2	PepFrag2	None	9334901	NAFQNALR	NAFQNALR	8	8	11.05	1335	1	1	0	0	726477	49720		106	1.2	b4b6*	161991	847	108230228267445	68230228267445	0.0091	Red	9718	9334964	9334997	220433	1028	1028.00	2.00	2
1	NCDO2118_RS00010	DNA polymerase III subunit beta 2099:3241 forward MW:42264	Regular	12905250	0	422643292	39	12	25	28.16	112835	91615	50493	0	8	Pass2	PepFrag2	None	15888329	NEESGFVQLITPVR	NEESGFVQLITPVR	364	14	4.26	1336	1	1	0	0	1272008	52153	Missing	360	1.5	b3y7y14	288607	1473	156516982104189	116516982104189	0.0088	Yellow	17727	15888445	15888463	310626	992	992.00	2.00	2
1	NCDO2118_RS00010	DNA polymerase III subunit beta 2099:3241 forward MW:42264	Regular	12905250	0	422643292	39	12	25	28.16	112835	91615	50493	0	9	Pass2	VarMod	Phosphoryl STY(*)	13576796	LLTVMTTNGTVK	LLTVMTTNGTVK	281	12	10.10	1338	4	4	0	0	2588278	55238		736	2.2	b8b10*b10-H3PO4b11b12*y5y7*y8y8y9-H3PO4y11*	211627	1233	139017140768438	990171407684379	0.0308	Yellow	8354	13576869	13576896	209832	3472	3472.00	2.45	2
1	NCDO2118_RS00010	DNA polymerase III subunit beta 2099:3241 forward MW:42264	Regular	12905250	0	422643292	39	12	25	28.16	112835	91615	50493	0	10	Pass2	VarMod	Phosphoryl STY(3)	12124932	NETISYYSR	NETISYYSR	234	9	6.84	1337	0	0	0	0	560649	48595		181	1.7	y6y7-H3PO4	160091	998	120738746218848	807387462188479	0.0195	Red	7989	12124991	12125021	207187	2201	2201.00	2.00	2
1	NCDO2118_RS00010	DNA polymerase III subunit beta 2099:3241 forward MW:42264	Regular	12905250	0	422643292	39	12	25	28.16	112835	91615	50493	0	11	Pass2	VarMod	Oxidation M(23);Phosphoryl STY(8)	30134125	LIPNEADYTLDLVFDAAQLRHTMDR	LIPNEADYTLDLVFDAAQLRHTMDR	254	25	4.12	1340	4	4	0	1	3516043	56568	Missing	447	2.3	b13b17y5y8	347282	2699	234366152570116	116244101713411	0.0164	Green	18163	30134112	30134040	319904	1846	1846.00	3.00	3
1	NCDO2118_RS00010	DNA polymerase III subunit beta 2099:3241 forward MW:42264	Regular	12905250	0	422643292	39	12	25	28.16	112835	91615	50493	0	12	Pass2	VarMod	Phosphoryl STY(8);Phosphoryl STY(13)	15867954	QAIGSKVTIPALTK	QAIGSKVTIPALTK	19	14	10.60	1339	0	0	0	0	2528073	55136	Identified	305	1.8	b5y5y6y8	216013	1392	150725173010307	110725173010307	0.0157	Yellow	12091	15867919	15867937	242536	1772	1772.00	2.00	2
1	NCDO2118_RS00010	DNA polymerase III subunit beta 2099:3241 forward MW:42264	Regular	12905250	0	422643292	39	12	25	28.16	112835	91615	50493	0	13	Pass2	InSource	None	5723039	PVDNK	NFLPVDNK	58	5	6.78	1332	3	3	0	0	25147970	0.0000	Identified	613	0.0	b3y3y3*y5y5*	191080	517	778789336328781	115757867265756	0.0324	Green	7597	5723032	5723050	204271	3654	3654.00	1.00	1
1	NCDO2118_RS00010	DNA polymerase III subunit beta 2099:3241 forward MW:42264	Regular	12905250	0	422643292	39	12	25	28.16	112835	91615	50493	0	14	Pass2	InSource	None	7203410	EDSELK	LLPLEDSELK	192	6	3.83	1334	3	3	0	0	6597425	0.0000		174	0.0	b4b6y4	264918	641	898803980730476	139760796146095	0.0080	Green	13288	7203423	7203441	253746	899	899.00	1.00	1
1	NCDO2118_RS00010	DNA polymerase III subunit beta 2099:3241 forward MW:42264	Regular	7397390	0	422643292	25	6	25	23.68	103473	40420	14580	1	1	Pass1	PepFrag1	None	9464993	NFLPVDNK	NFLPVDNK	55	8	6.78	2255	7	7	3	2	169821000	70991	Identified	8632	4.1	b2b2*b3b3*y2y3y3*y4*y5y5*y6y6*y8y8*	198740	872	110349564655678	703495646556783	0.2668	Green	4663	9464984	9465012	204645	27606	27606.00	1.93	2
1	NCDO2118_RS00010	DNA polymerase III subunit beta 2099:3241 forward MW:42264	Regular	7397390	0	422643292	25	6	25	23.68	103473	40420	14580	0	2	Pass1	PepFrag1	None	11566460	LLPLEDSELK	LLPLEDSELK	188	10	3.83	2256	4	4	2	0	79152440	67675	Identified	3586	3.2	y2y6y7y8	259127	1103	129065442828005	890654428280055	0.1071	Green	9979	11566432	11566458	252726	11083	11083.00	2.00	2
1	NCDO2118_RS00010	DNA polymerase III subunit beta 2099:3241 forward MW:42264	Regular	7397390	0	422643292	25	6	25	23.68	103473	40420	14580	0	3	Pass1	PepFrag1	None	12646168	LIEGSYPDTNR	LIEGSYPDTNR	243	11	4.07	2254	3	3	1	0	20660070	61842	Identified	463	1.7	b6y5y8y9	151488	1137	131704296833136	91704296833136	0.0167	Green	1258	12646139	12646162	157861	1731	1731.00	2.00	2
1	NCDO2118_RS00010	DNA polymerase III subunit beta 2099:3241 forward MW:42264	Regular	7397390	0	422643292	25	6	25	23.68	103473	40420	14580	0	4	Pass1	PepFrag1	None	29274844	LTVSGDSVVTTANSPEVGSVHEELTALSK	LTVSGDSVVTTANSPEVGSVHEELTALSK	293	29	4.16	2257	2	2	0	1	14953620	60438	Identified	256	1.8	b11b14*b17y12	288246	2721	235638000407032	117092000271354	0.0079	Green	13382	29274860	29274812	286222	819	819.00	3.00	3
1	NCDO2118_RS00010	DNA polymerase III subunit beta 2099:3241 forward MW:42264	Regular	7397390	0	422643292	25	6	25	23.68	103473	40420	14580	0	5	Pass2	VarMod	Phosphoryl STY(9);Phosphoryl STY(13);Phosphoryl STY(18)	23540328	IEVEENGITLIGSNGQISIK	IEVEENGITLIGSNGQISIK	35	20	3.96	2258	6	6	1	0	3736065	54415		1226	7.5	b2b3b6b8b12*b14-H3PO4b17-H3PO4b19y2y6y7*y9-H3PO4	316441	2000	191916787182955	879445247886369	0.5574	Yellow	15278	23540272	23540278	304569	57674	57674.00	2.77	3
1	NCDO2118_RS00010	DNA polymerase III subunit beta 2099:3241 forward MW:42264	Regular	7397390	0	422643292	25	6	25	23.68	103473	40420	14580	0	6	Pass2	VarMod	Phosphoryl STY(*);Phosphoryl STY(*)	43461125	LLTVMTTNGTVKLTVSGDSVVTTANSPEVGSVHEELTALSK	LLTVMTTNGTVKLTVSGDSVVTTANSPEVGSVHEELTALSK	281	41	4.63	2259	2	2	0	0	2276505	52263	Missing	313	3.4	b6b7-H3PO4b13*y9	295263	3954	302308768540489	607695895134963	0.0315	Yellow	9048	43461054	43461054	245004	3260	3260.00	6.00	6
1	NCDO2118_RS00010	DNA polymerase III subunit beta 2099:3241 forward MW:42264	Regular	7397390	0	422643292	25	6	25	23.68	103473	40420	14580	0	7	Pass2	InSource	None	3752027	NFL	NFLPVDNK	55	3	6.13	2255	1	1	0	0	1373902	0.0000		104	0.0	b3b3*	198740	355	606147804175728	812295608351456	0.0126	Green	4647	3752001	3752017	204511	1300	1300.00	1.00	1
1	NCDO2118_RS00010	DNA polymerase III subunit beta 2099:3241 forward MW:42264	Regular	24383150	0	422643292	52	10	25	37.89	121899	98550	48747	1	1	Pass1	PepFrag1	None	21220703	EGNDLAISFNPEYLIDALK	EGNDLAISFNPEYLIDALK	322	19	3.59	2486	18	18	13	5	170446900	76187	Identified	21335	7.4	b3b4b4b5b5b6b6b7b7*b7b8b8b9b9b10b17b19*y4y5y6y6y9y10y11y12y13y19	431444	1968	189864176634406	149864176634406	0.4819	Green	48889	21220670	21220654	438187	58745	58745.00	2.06	2
1	NCDO2118_RS00010	DNA polymerase III subunit beta 2099:3241 forward MW:42264	Regular	24383150	0	422643292	52	10	25	37.89	121899	98550	48747	0	2	Pass1	PepFrag1	None	22771761	LIPNEADYTLDLVFDAAQLR	LIPNEADYTLDLVFDAAQLR	254	20	3.50	2485	15	15	6	2	291321400	78515	Identified	10788	6.0	b2b6*b9b11b13b15b17y4y5y6y7y7y8y10y12y14y15y15y17y18y18y20	417297	2125	199832255582891	932215037219275	0.2604	Green	48811	22771776	22771777	437187	31748	31748.00	2.64	3
1	NCDO2118_RS00010	DNA polymerase III subunit beta 2099:3241 forward MW:42264	Regular	24383150	0	422643292	52	10	25	37.89	121899	98550	48747	0	3	Pass1	PepFrag1	None	8455091	QVLLTSGK	QVLLTSGK	102	8	10.10	2488	4	4	1	1	9201416	63509		1576	2.6	b2y5y6y8	139755	816	105573051186756	655730511867559	0.0661	Green	4069	8455047	8455077	209916	8057	8057.00	1.50	2
1	NCDO2118_RS00010	DNA polymerase III subunit beta 2099:3241 forward MW:42264	Regular	24383150	0	422643292	52	10	25	37.89	121899	98550	48747	0	4	Pass1	PepFrag1	None	15748802	FISNVRPFTLQPR	FISNVRPFTLQPR	351	13	12.40	2490	5	5	1	0	2552160	57940	Missing	7910	2.2	b3b7b8b8*y3y9*y11y13	206811	1475	156658626443963	644390842959755	0.0248	Yellow	11486	15748723	15748766	254055	3023	3023.00	2.78	3
1	NCDO2118_RS00010	DNA polymerase III subunit beta 2099:3241 forward MW:42264	Regular	24383150	0	422643292	52	10	25	37.89	121899	98550	48747	0	5	Pass1	PepFrag1	None	9185295	FDVILPSK	FDVILPSK	198	8	6.78	2489	1	1	0	0	10531400	64096	Identified	31	1.6	y3	225140	877	110770988111791	707709881117911	0.0184	Green	9115	9185251	9185281	241422	2246	2246.00	1.78	2
1	NCDO2118_RS00010	DNA polymerase III subunit beta 2099:3241 forward MW:42264	Regular	24383150	0	422643292	52	10	25	37.89	121899	98550	48747	0	6	Pass2	PepFrag2	None	8425346	VTIPALTK	VTIPALTK	25	8	10.10	2487	3	3	1	0	1204757	54680	Missing	5420	2.5	b8y7y8	160572	831	106862906810347	173725813620694	0.0618	Yellow	14440	8425408	8425431	265911	7539	7539.00	1.00	1
1	NCDO2118_RS00010	DNA polymerase III subunit beta 2099:3241 forward MW:42264	Regular	24383150	0	422643292	52	10	25	37.89	121899	98550	48747	0	7	Pass2	MissedCleavage	None	23553130	LKIEVEENGITLIGSNGQISIK	LKIEVEENGITLIGSNGQISIK	33	22	4.56	2491	2	2	0	0	8356758	63091		221	2.0	y7y9y17	415653	2259	208147143293446	987647621956308	0.0112	Green	50159	23553023	23553016	450736	1369	1369.00	3.00	3
1	NCDO2118_RS00010	DNA polymerase III subunit beta 2099:3241 forward MW:42264	Regular	24383150	0	422643292	52	10	25	37.89	121899	98550	48747	0	8	Pass2	VarMod	Phosphoryl STY(5);Phosphoryl STY(12)	16768271	QVLLTSGKSEITLK	QVLLTSGKSEITLK	102	14	9.88	2493	3	3	1	0	5323356	61133		481	3.0	y3y3y9-H3PO4y10y11y12	236314	1474	156587812282011	116587812282011	0.0575	Green	24914	16768173	16768185	306715	7006	7006.00	2.00	2
1	NCDO2118_RS00010	DNA polymerase III subunit beta 2099:3241 forward MW:42264	Regular	24383150	0	422643292	52	10	25	37.89	121899	98550	48747	0	9	Pass2	VarMod	Oxidation M(25)	33105936	SINSFKNVFTNDEEEIEIFISGSQMLFR	SINSFKNVFTNDEEEIEIFISGSQMLFR	206	28	4.00	2494	0	0	0	0	2920696	58526		386	2.0	b5b6*b12*y10*	484723	3034	253378650349112	128919100232741	0.0097	Yellow	24580	33106184	33106054	304970	1178	1178.00	3.00	3
1	NCDO2118_RS00010	DNA polymerase III subunit beta 2099:3241 forward MW:42264	Regular	24383150	0	422643292	52	10	25	37.89	121899	98550	48747	0	10	Pass2	VarMod	Oxidation M(5);Phosphoryl STY(10)	13736745	LLTVMTTNGTVK	LLTVMTTNGTVK	281	12	10.10	2492	1	1	0	0	2120168	57135		599	1.4	b3b9y6y5-H3PO4y8-H3PO4	219532	1233	139017140768438	990171407684379	0.0081	Yellow	20650	13736824	13736848	290082	988	988.00	2.00	2
1	NCDO2118_RS00010	DNA polymerase III subunit beta 2099:3241 forward MW:42264	Regular	5917010	0	422643292	18	4	25	10.79	35810	35055	7521	1	1	Pass1	PepFrag1	None	11566460	LLPLEDSELK	LLPLEDSELK	188	10	3.83	1706	6	6	4	0	65901090	65910	Identified	3250	3.2	b7y4y5y6y7y8	264025	1103	129065442828005	890654428280055	0.3060	Green	8573	11566433	11566459	253154	10957	10957.00	2.00	2
1	NCDO2118_RS00010	DNA polymerase III subunit beta 2099:3241 forward MW:42264	Regular	5917010	0	422643292	18	4	25	10.79	35810	35055	7521	0	2	Pass1	PepFrag1	None	12777133	LLTVMTTNGTVK	LLTVMTTNGTVK	281	12	10.10	1708	1	1	0	0	301990	42521		168	3.3	b2b9	212851	1233	139017140768438	990171407684379	0.2814	Red	11792	12777106	12777129	294678	10078	10078.00	2.00	2
1	NCDO2118_RS00010	DNA polymerase III subunit beta 2099:3241 forward MW:42264	Regular	5917010	0	422643292	18	4	25	10.79	35810	35055	7521	0	3	Pass1	PepFrag1	None	12646168	LIEGSYPDTNR	LIEGSYPDTNR	243	11	4.07	1705	2	2	0	0	22520000	61247	Identified	128	1.2	y5y8	157131	1137	131704296833136	91704296833136	0.0211	Green	1369	12646132	12646156	157762	755	755.00	2.00	2
1	NCDO2118_RS00010	DNA polymerase III subunit beta 2099:3241 forward MW:42264	Regular	5917010	0	422643292	18	4	25	10.79	35810	35055	7521	0	4	Pass2	PepFrag2	None	9464993	NFLPVDNK	NFLPVDNK	55	8	6.78	1707	9	9	6	2	167263600	69955	Identified	3975	3.2	b2b3b6y1y2y3y3y5y5y6y7y8	199584	872	110349564655678	703495646556783	0.3915	Green	4110	9465041	9465071	204486	14020	14020.00	1.94	2
1	NCDO2118_RS00010	DNA polymerase III subunit beta 2099:3241 forward MW:42264	Regular	15181320	0	422643292	49	12	25	55.00	83406	93201	26766	1	1	Pass1	PepFrag1	None	21220703	EGNDLAISFNPEYLIDALK	EGNDLAISFNPEYLIDALK	322	19	3.59	2771	16	16	7	3	118448500	72548	Identified	14720	6.3	b4b4b5b5b6b6*b6b7b7*b8b8b9b10b12b19y1y4y9y10y11y12y13y16y19	428033	1968	189864176634406	149864176634406	0.4638	Green	42082	21220746	21220738	438318	38686	38686.00	2.08	2
1	NCDO2118_RS00010	DNA polymerase III subunit beta 2099:3241 forward MW:42264	Regular	15181320	0	422643292	49	12	25	55.00	83406	93201	26766	0	2	Pass1	PepFrag1	None	22771761	LIPNEADYTLDLVFDAAQLR	LIPNEADYTLDLVFDAAQLR	254	20	3.50	2770	14	14	6	3	171520600	74156	Identified	7083	5.4	b2b8b9b9b10b12b12b13b16b20y5y6y7y8y9y10*y11y15y18y18y20	416532	2125	199832255582891	932215037219275	0.2811	Green	42000	22771806	22771817	437342	23448	23448.00	2.66	3
1	NCDO2118_RS00010	DNA polymerase III subunit beta 2099:3241 forward MW:42264	Regular	15181320	0	422643292	49	12	25	55.00	83406	93201	26766	0	3	Pass2	PepFrag2	None	9334901	NAFQNALR	NAFQNALR	8	8	11.05	2772	2	2	0	0	1150919	52424		1318	1.6	b5y4*y8	162000	847	108230228267445	17646045653489	0.0257	Red	7162	9334784	9334808	241303	2140	2140.00	1.00	1
1	NCDO2118_RS00010	DNA polymerase III subunit beta 2099:3241 forward MW:42264	Regular	15181320	0	422643292	49	12	25	55.00	83406	93201	26766	0	4	Pass2	PepFrag2	None	36939010	EIFTETVFAVSTQENRPIFTGVHLETLSTGELK	EIFTETVFAVSTQENRPIFTGVHLETLSTGELK	143	33	4.42	2781	2	2	0	0	2243254	55322	Missing	774	2.3	b10y33	423721	3453	276200219740423	236200219740423	0.0159	Yellow	35354	36939169	36938949	376217	1326	1326.00	2.00	2
1	NCDO2118_RS00010	DNA polymerase III subunit beta 2099:3241 forward MW:42264	Regular	15181320	0	422643292	49	12	25	55.00	83406	93201	26766	0	5	Pass2	PepFrag2	None	11566460	LLPLEDSELK	LLPLEDSELK	188	10	3.83	2773	1	1	0	0	473354	48565	Missing	74	1.2	b9b9	264986	1103	129065442828005	890654428280055	0.0097	Red	19466	11566328	11566363	303019	808	808.00	2.00	2
1	NCDO2118_RS00010	DNA polymerase III subunit beta 2099:3241 forward MW:42264	Regular	15181320	0	422643292	49	12	25	55.00	83406	93201	26766	0	6	Pass2	MissedCleavage	None	23553130	LKIEVEENGITLIGSNGQISIK	LKIEVEENGITLIGSNGQISIK	33	22	4.56	2774	1	1	0	0	1873795	54540		107	1.9	b9b9y9*	408717	2259	208147143293446	987647621956308	0.0149	Yellow	43194	23553074	23553079	452557	1241	1241.00	2.72	3
1	NCDO2118_RS00010	DNA polymerase III subunit beta 2099:3241 forward MW:42264	Regular	15181320	0	422643292	49	12	25	55.00	83406	93201	26766	0	7	Pass2	VarMod	Phosphoryl STY(*)	13106715	EQKQVLLTSGK	EQKQVLLTSGK	99	11	9.88	2776	3	3	0	0	3397931	57125		116	2.6	b6b10y7	135112	1174	134546281275756	945462812757559	0.0676	Yellow	8396	13106708	13106741	248628	5638	5638.00	2.00	2
1	NCDO2118_RS00010	DNA polymerase III subunit beta 2099:3241 forward MW:42264	Regular	15181320	0	422643292	49	12	25	55.00	83406	93201	26766	0	8	Pass2	VarMod	Phosphoryl STY(20)	36027414	LIEGSYPDTNRLIPNEADYTLDLVFDAAQLR	LIEGSYPDTNRLIPNEADYTLDLVFDAAQLR	243	31	3.69	2778	3	3	0	0	5794694	59443	Identified	1101	3.3	b4b6b13b25b29y6y7*y15y17y29-H3PO4	407354	3262	265918736551367	929593682756834	0.0482	Green	28231	36027496	36027484	341497	4018	4018.00	3.69	4
1	NCDO2118_RS00010	DNA polymerase III subunit beta 2099:3241 forward MW:42264	Regular	15181320	0	422643292	49	12	25	55.00	83406	93201	26766	0	9	Pass2	VarMod	Oxidation M(1)	16748731	MSQRLLPLEDSELK	MSQRLLPLEDSELK	184	14	4.44	2777	0	0	0	0	2440925	55689	Identified	201	1.9	b6b12y10	275118	1562	162759739925828	122759739925828	0.0243	Yellow	6688	16748822	16748841	238708	2026	2026.00	2.00	2
1	NCDO2118_RS00010	DNA polymerase III subunit beta 2099:3241 forward MW:42264	Regular	15181320	0	422643292	49	12	25	55.00	83406	93201	26766	0	10	Pass2	VarMod	Oxidation M(4)	38879511	DASMLISGTGSVLLEAAFFENVVSQLPEVTLEFTEK	DASMLISGTGSVLLEAAFFENVVSQLPEVTLEFTEK	63	36	3.50	2775	2	2	0	1	12193050	62674	Missing	726	2.6	b33y3y11y13*	547133	3632	285664886450045	102832443225023	0.0222	Green	37807	38879648	38879626	389730	1851	1851.00	4.00	4
1	NCDO2118_RS00010	DNA polymerase III subunit beta 2099:3241 forward MW:42264	Regular	15181320	0	422643292	49	12	25	55.00	83406	93201	26766	0	11	Pass2	VarMod	Oxidation M(7);Phosphoryl STY(12)	16008128	ARLLTVMTTNGTVK	ARLLTVMTTNGTVK	279	14	11.49	2779	2	2	0	0	5506044	59221		358	1.6	b7b10y10y10	210644	1448	154740979683982	114740979683982	0.0151	Green	14053	16008108	16008131	278936	1258	1258.00	2.00	2
1	NCDO2118_RS00010	DNA polymerase III subunit beta 2099:3241 forward MW:42264	Regular	15181320	0	422643292	49	12	25	55.00	83406	93201	26766	0	12	Pass2	VarMod	Phosphoryl STY(*);Phosphoryl STY(*)	43461125	LLTVMTTNGTVKLTVSGDSVVTTANSPEVGSVHEELTALSK	LLTVMTTNGTVKLTVSGDSVVTTANSPEVGSVHEELTALSK	281	41	4.63	2780	3	3	0	0	3157050	56806	Missing	188	2.2	b4b9-H3PO4b15b27	328351	3954	302308768540489	111154384270244	0.0116	Yellow	43561	43461470	43461427	457562	966	966.00	4.00	4
1	NCDO2118_RS00010	DNA polymerase III subunit beta 2099:3241 forward MW:42264	Regular	7508320	0	422643292	16	4	25	11.84	53442	46174	17523	1	1	Pass1	PepFrag1	None	11566460	LLPLEDSELK	LLPLEDSELK	188	10	3.83	1130	8	8	4	1	230622900	72384	Identified	16165	5.1	b2y2y4y6y7y8y8y9y10	264110	1103	129065442828005	890654428280055	0.7641	Green	9649	11566416	11566447	254957	40835	40835.00	1.99	2
1	NCDO2118_RS00010	DNA polymerase III subunit beta 2099:3241 forward MW:42264	Regular	7508320	0	422643292	16	4	25	11.84	53442	46174	17523	0	2	Pass1	PepFrag1	None	9464993	NFLPVDNK	NFLPVDNK	55	8	6.78	1129	4	4	1	1	63163610	66760	Identified	768	2.0	b2b3y3y5	194378	872	110349564655678	703495646556783	0.0743	Green	5375	9464944	9464979	205315	3973	3973.00	2.00	2
1	NCDO2118_RS00010	DNA polymerase III subunit beta 2099:3241 forward MW:42264	Regular	7508320	0	422643292	16	4	25	11.84	53442	46174	17523	0	3	Pass1	PepFrag1	None	15888329	NEESGFVQLITPVR	NEESGFVQLITPVR	364	14	4.26	1131	1	1	0	0	1924179	51598	Missing	56	1.7	y6	287982	1473	156516982104189	643446547361259	0.0256	Yellow	9037	15888245	15888269	247790	1366	1366.00	3.00	3
1	NCDO2118_RS00010	DNA polymerase III subunit beta 2099:3241 forward MW:42264	Regular	7508320	0	422643292	16	4	25	11.84	53442	46174	17523	0	4	Pass2	PepFrag2	None	15748802	FISNVRPFTLQPR	FISNVRPFTLQPR	351	13	12.40	1132	0	0	0	0	1129664	49285	Identified	138	2.7	y7*y7y10*	268583	1475	156658626443963	116658626443963	0.1054	Yellow	9742	15748271	15748283	256532	5632	5632.00	2.00	2
1	NCDO2118_RS00010	DNA polymerase III subunit beta 2099:3241 forward MW:42264	Regular	7508320	0	422643292	16	4	25	11.84	53442	46174	17523	0	5	Pass2	InSource	None	5723039	PVDNK	NFLPVDNK	58	5	6.78	1129	3	3	1	0	46117410	0.0000	Identified	396	0.0	y2y3y4*y5	194378	517	778789336328781	115757867265756	0.0306	Green	5373	5723016	5723036	205288	1636	1636.00	1.00	1
1	NCDO2118_RS00010	DNA polymerase III subunit beta 2099:3241 forward MW:42264	Regular	14434550	0	422643292	29	7	25	26.05	34752	30137	9218	1	1	Pass1	PepFrag1	None	22771761	LIPNEADYTLDLVFDAAQLR	LIPNEADYTLDLVFDAAQLR	254	20	3.50	2168	11	11	2	1	115387800	72216	Identified	3379	4.7	b7b9b10y1y3y5y6y8y8y10y14y18y20	423754	2125	199832255582891	932215037219275	0.4572	Green	35745	22771768	22771775	438425	15887	15887.00	2.71	3
1	NCDO2118_RS00010	DNA polymerase III subunit beta 2099:3241 forward MW:42264	Regular	14434550	0	422643292	29	7	25	26.05	34752	30137	9218	0	2	Pass1	PepFrag1	None	21220703	EGNDLAISFNPEYLIDALK	EGNDLAISFNPEYLIDALK	322	19	3.59	2169	14	14	8	3	155088600	73500	Identified	5123	4.2	b4b4b5b5b6b6b7b7*b9b9y4y5y6y9y10y11y12y14y15y19	423135	1968	189864176634406	149864176634406	0.3637	Green	35827	21220733	21220712	439425	12638	12638.00	2.14	2
1	NCDO2118_RS00010	DNA polymerase III subunit beta 2099:3241 forward MW:42264	Regular	14434550	0	422643292	29	7	25	26.05	34752	30137	9218	0	3	Pass1	PepFrag1	None	9185295	FDVILPSK	FDVILPSK	198	8	6.78	2171	0	0	0	0	3285077	56759	Identified	105	1.4	b8y3	223656	877	110770988111791	181541976223582	0.0464	Yellow	15644	9185261	9185279	307752	1612	1612.00	1.00	1
1	NCDO2118_RS00010	DNA polymerase III subunit beta 2099:3241 forward MW:42264	Regular	14434550	0	422643292	29	7	25	26.05	34752	30137	9218	0	4	Pass1	PepFrag1	None	29274844	LTVSGDSVVTTANSPEVGSVHEELTALSK	LTVSGDSVVTTANSPEVGSVHEELTALSK	293	29	4.16	2172	0	0	0	0	3556442	57104	Identified	37	2.0	b14*	322737	2721	235638000407032	117092000271354	0.0331	Yellow	19830	29274995	29274937	325371	1151	1151.00	3.00	3
1	NCDO2118_RS00010	DNA polymerase III subunit beta 2099:3241 forward MW:42264	Regular	14434550	0	422643292	29	7	25	26.05	34752	30137	9218	0	5	Pass1	PepFrag1	None	11566460	LLPLEDSELK	LLPLEDSELK	188	10	3.83	2170	0	0	0	0	10127040	61649	Identified	83	1.4	y8	267270	1103	129065442828005	890654428280055	0.0329	Green	14990	11566434	11566461	304751	1144	1144.00	2.00	2
1	NCDO2118_RS00010	DNA polymerase III subunit beta 2099:3241 forward MW:42264	Regular	14434550	0	422643292	29	7	25	26.05	34752	30137	9218	0	6	Pass2	VarMod	Oxidation M(5)	12937082	LLTVMTTNGTVK	LLTVMTTNGTVK	281	12	10.10	2173	3	3	1	0	1210622	52424		258	1.5	b3b11*y7y8	227029	1233	139017140768438	990171407684379	0.0341	Red	28722	12936967	12936991	372525	1186	1186.00	2.00	2
1	NCDO2118_RS00010	DNA polymerase III subunit beta 2099:3241 forward MW:42264	Regular	14434550	0	422643292	29	7	25	26.05	34752	30137	9218	0	7	Pass2	VarMod	Phosphoryl STY(2)	16027788	FSINKNAFQNALR	FSINKNAFQNALR	3	13	11.49	2174	1	1	0	0	2401821	55399		233	1.5	b7-H3PO4y4*y6	205973	1410	152021743589642	112021743589642	0.0326	Yellow	13241	16027755	16027768	295900	1134	1134.00	2.00	2
1	NCDO2118_RS00010	DNA polymerase III subunit beta 2099:3241 forward MW:42264	Regular	11360720	0.58	422643292	22	8	25	26.32	76457	63392	33586	1	1	Pass1	PepFrag1	None	11566460	LLPLEDSELK	LLPLEDSELK	188	10	3.83	1196	10	10	8	1	419264200	76779	Identified	31557	5.9	b2y2y3y4y5y6y6y7y8y8y9y10	259191	1103	129065442828005	890654428280055	0.7972	Green	11065	11566436	11566464	254602	60951	60951.00	1.97	2
1	NCDO2118_RS00010	DNA polymerase III subunit beta 2099:3241 forward MW:42264	Regular	11360720	0.58	422643292	22	8	25	26.32	76457	63392	33586	0	2	Pass1	PepFrag1	None	9464993	NFLPVDNK	NFLPVDNK	55	8	6.78	1198	1	1	0	0	547777	47940	Missing	32	1.3	b4	192651	872	110349564655678	703495646556783	0.0162	Red	11165	9464967	9464997	256159	1242	1242.00	2.00	2
1	NCDO2118_RS00010	DNA polymerase III subunit beta 2099:3241 forward MW:42264	Regular	11360720	0.58	422643292	22	8	25	26.32	76457	63392	33586	0	3	Pass1	PepFrag1	None	22020925	GLDSEIYPHLQEISEGSSLK	GLDSEIYPHLQEISEGSSLK	116	20	4.16	1199	2	2	0	0	2316283	54202	Missing	542	1.8	b10y20	296912	2024	193449067074994	153449067074994	0.0157	Yellow	16789	22020865	22020839	408981	1199	1199.00	2.00	2
1	NCDO2118_RS00010	DNA polymerase III subunit beta 2099:3241 forward MW:42264	Regular	11360720	0.58	422643292	22	8	25	26.32	76457	63392	33586	0	4	Pass1	PepFrag1	None	11325269	NETISYYSR	NETISYYSR	234	9	6.84	1200	0	0	0	0	585547	48230		80	1.3	y4	155654	998	120738746218848	807387462188479	0.0126	Red	7543	11325217	11325245	215714	961	961.00	2.00	2
1	NCDO2118_RS00010	DNA polymerase III subunit beta 2099:3241 forward MW:42264	Regular	11360720	0.58	422643292	22	8	25	26.32	76457	63392	33586	0	5	Pass1	PepFrag1	None	15888329	NEESGFVQLITPVR	NEESGFVQLITPVR	364	14	4.26	1197	1	1	0	0	3547936	56054	Missing	316	1.4	b3b13y7y14	292001	1473	156516982104189	116516982104189	0.0108	Green	14518	15888314	15888328	311066	822	822.00	2.00	2
1	NCDO2118_RS00010	DNA polymerase III subunit beta 2099:3241 forward MW:42264	Regular	11360720	0.58	422643292	22	8	25	26.32	76457	63392	33586	0	6	Pass2	PepFrag2	None	15748802	FISNVRPFTLQPR	FISNVRPFTLQPR	351	13	12.40	1203	1	1	0	0	1444724	52152	Missing	31	2.3	y8	256056	1475	156658626443963	116658626443963	0.0450	Yellow	10488	15748234	15748249	247947	3441	3441.00	2.00	2
1	NCDO2118_RS00010	DNA polymerase III subunit beta 2099:3241 forward MW:42264	Regular	11360720	0.58	422643292	22	8	25	26.32	76457	63392	33586	0	7	Pass2	VarMod	Phosphoryl STY(5);Phosphoryl STY(6)	16768271	QVLLTSGKSEITLK	QVLLTSGKSEITLK	102	14	9.88	1202	2	2	0	0	1660738	52757		308	2.7	b6-H3PO4b12-H3PO4y1y10y11	254453	1474	156587812282011	116587812282011	0.0700	Yellow	11931	16768201	16768212	265445	5355	5355.00	2.00	2
1	NCDO2118_RS00010	DNA polymerase III subunit beta 2099:3241 forward MW:42264	Regular	11360720	0.58	422643292	22	8	25	26.32	76457	63392	33586	0	8	Pass2	VarMod	Phosphoryl STY(3)	13576796	LLTVMTTNGTVK	LLTVMTTNGTVK	281	12	10.10	1201	4	4	0	1	3512512	56010		342	1.6	b5y5y7y12	218628	1233	139017140768438	526780938456253	0.0191	Green	7788	13576708	13576743	217924	1462	1462.00	2.75	3
1	NCDO2118_RS00010	DNA polymerase III subunit beta 2099:3241 forward MW:42264	Regular	11360720	0.58	422643292	22	8	25	26.32	76457	63392	33586	0	9	Pass2	InSource	None	8334251	LEDSELK	LLPLEDSELK	191	7	3.83	1196	1	1	0	0	1126703	0.0000		378	0.0	y7	259191	765	101127031163723	162254062327446	0.0134	Green	11064	8334273	8334292	254595	1024	1024.00	1.00	1
1	NCDO2118_RS00010	DNA polymerase III subunit beta 2099:3241 forward MW:42264	Regular	2555764	0.67	422643292	13	2	25	5.79	51733	131319	18733	1	1	Pass1	PepFrag1	None	11325269	NETISYYSR	NETISYYSR	234	9	6.84	1983	8	8	6	2	99147830	64038		17162	5.0	b2b2b3b3*b3b4y4y5y6y7y7y8y9	146516	998	120738746218848	807387462188479	0.8461	Green	3249	11325281	11325308	160614	43773	43773.00	1.94	2
1	NCDO2118_RS00010	DNA polymerase III subunit beta 2099:3241 forward MW:42264	Regular	2555764	0.67	422643292	13	2	25	5.79	51733	131319	18733	0	2	Pass2	PepFrag2	None	15748802	FISNVRPFTLQPR	FISNVRPFTLQPR	351	13	12.40	1984	3	3	0	0	6066126	51904	Identified	712	2.8	b8b11y10y11y13	278278	1475	156658626443963	116658626443963	0.1217	Yellow	10309	15748254	15748272	232336	6295	6295.00	2.00	2
1	NCDO2118_RS00010	DNA polymerase III subunit beta 2099:3241 forward MW:42264	Regular	2555764	0.67	422643292	13	2	25	5.79	51733	131319	18733	0	3	Pass2	InSource	None	6753097	SYYSR	NETISYYSR	238	5	9.59	1983	2	2	0	0	438960	0.0000		859	0.0	b2y5	146516	576	836966270640795	127393254128159	0.0322	Green	3252	6753103	6753122	160642	1665	1665.00	1.00	1
1	NCDO2118_RS00010	DNA polymerase III subunit beta 2099:3241 forward MW:42264	Regular	4572613	0.76	422643292	17	4	25	6.58	139426	95119.5	32715	1	1	Pass1	PepFrag1	None	11325269	NETISYYSR	NETISYYSR	234	9	6.84	1870	9	9	7	2	184495700	69262		29945	5.6	b2b2*b2b3b3b4b9*y3y4y5y5y6y7y7y8y9	153228	998	120738746218848	807387462188479	0.4243	Green	3665	11325216	11325249	159380	59157	59157.00	1.94	2
1	NCDO2118_RS00010	DNA polymerase III subunit beta 2099:3241 forward MW:42264	Regular	4572613	0.76	422643292	17	4	25	6.58	139426	95119.5	32715	0	2	Pass1	PepFrag1	None	15888329	NEESGFVQLITPVR	NEESGFVQLITPVR	364	14	4.26	1872	3	3	0	0	4976061	53571	Identified	707	2.5	b9b11y14	280086	1473	156516982104189	116516982104189	0.0305	Yellow	18169	15888350	15888374	311142	4256	4256.00	2.00	2
1	NCDO2118_RS00010	DNA polymerase III subunit beta 2099:3241 forward MW:42264	Regular	4572613	0.76	422643292	17	4	25	6.58	139426	95119.5	32715	0	3	Pass2	PepFrag2	None	11566460	LLPLEDSELK	LLPLEDSELK	188	10	3.83	1871	1	1	0	0	746657	45333	Missing	1456	6.3	y3	249929	1103	129065442828005	890654428280055	0.5250	Red	15329	11566319	11566352	261692	73196	73196.00	1.91	2
1	NCDO2118_RS00010	DNA polymerase III subunit beta 2099:3241 forward MW:42264	Regular	4572613	0.76	422643292	17	4	25	6.58	139426	95119.5	32715	0	4	Pass2	VarMod	Phosphoryl STY(*)	18838899	NEESGFVQLITPVRTN	NEESGFVQLITPVRTN	364	16	4.26	1873	4	4	0	0	2200011	50026	Missing	607	2.3	b8b15-H3PO4y1y2y4*y7y16	275544	1662	169634290687124	730895271247495	0.0202	Yellow	7567	18838852	18838879	192244	2817	2817.00	2.88	3
1	NCDO2118_RS00010	DNA polymerase III subunit beta 2099:3241 forward MW:42264	Regular	4041747	0.81	422643292	15	5	25	7.89	35153	27258	5148	1	1	Pass1	PepFrag1	None	12777133	LLTVMTTNGTVK	LLTVMTTNGTVK	281	12	10.10	1581	0	0	0	0	1153496	46686		39	3.7	y6*	207609	1233	139017140768438	990171407684379	0.4009	Red	10028	12777122	12777141	294977	14093	14093.00	2.00	2
1	NCDO2118_RS00010	DNA polymerase III subunit beta 2099:3241 forward MW:42264	Regular	4041747	0.81	422643292	15	5	25	7.89	35153	27258	5148	0	2	Pass1	PepFrag1	None	9464993	NFLPVDNK	NFLPVDNK	55	8	6.78	1579	6	6	2	2	127240900	67112	Identified	2986	2.9	b2b2*b3b3*y3y5y5*y6y6y8	207576	872	110349564655678	703495646556783	0.3045	Green	3432	9464950	9464977	204814	10705	10705.00	1.95	2
1	NCDO2118_RS00010	DNA polymerase III subunit beta 2099:3241 forward MW:42264	Regular	4041747	0.81	422643292	15	5	25	7.89	35153	27258	5148	0	3	Pass1	PepFrag1	None	11566460	LLPLEDSELK	LLPLEDSELK	188	10	3.83	1580	4	4	3	0	49422100	63005	Identified	1232	1.8	y5y6y7y8	261434	1103	129065442828005	890654428280055	0.0700	Green	7092	11566420	11566443	253625	2460	2460.00	2.00	2
1	NCDO2118_RS00010	DNA polymerase III subunit beta 2099:3241 forward MW:42264	Regular	4041747	0.81	422643292	15	5	25	7.89	35153	27258	5148	0	4	Pass2	PepFrag2	None	9334901	NAFQNALR	NAFQNALR	8	8	11.05	1583	1	1	0	0	1234160	46979		56	1.7	b6	181550	847	108230228267445	68230228267445	0.0768	Red	2863	9334673	9334699	196162	2698	2698.00	2.00	2
1	NCDO2118_RS00010	DNA polymerase III subunit beta 2099:3241 forward MW:42264	Regular	4041747	0.81	422643292	15	5	25	7.89	35153	27258	5148	0	5	Pass2	VarMod	Phosphoryl STY(*)	36027414	LIEGSYPDTNRLIPNEADYTLDLVFDAAQLR	LIEGSYPDTNRLIPNEADYTLDLVFDAAQLR	243	31	3.69	1582	0	0	0	0	1109989	46519	Missing	124	2.1	b21*y27	378864	3262	265918736551367	663674946205467	0.0343	Red	13191	36027490	36027490	344007	1204	1204.00	5.00	5
1	NCDO2118_RS00010	DNA polymerase III subunit beta 2099:3241 forward MW:42264	Regular	4041747	0.81	422643292	15	5	25	7.89	35153	27258	5148	0	6	Pass2	InSource	None	5723039	PVDNK	NFLPVDNK	58	5	6.78	1579	4	4	1	1	91709660	0.0000	Identified	711	0.0	b3y2y3y5y5*	207576	517	778789336328781	115757867265756	0.1136	Green	3429	5723030	5723047	204805	3993	3993.00	1.00	1
1	NCDO2118_RS00010	DNA polymerase III subunit beta 2099:3241 forward MW:42264	Regular	3704703	1.54	422643292	19	9	25	11.05	184019	62010	15692	1	1	Pass1	PepFrag1	None	11325269	NETISYYSR	NETISYYSR	234	9	6.84	1837	8	8	6	2	138657400	67107		11866	4.8	b2b2*b2b3b4y4y5y5y6y7y8y9	142811	998	120738746218848	807387462188479	0.2095	Green	3740	11325263	11325284	160496	38549	38549.00	1.95	2
1	NCDO2118_RS00010	DNA polymerase III subunit beta 2099:3241 forward MW:42264	Regular	3704703	1.54	422643292	19	9	25	11.05	184019	62010	15692	0	2	Pass1	PepFrag1	None	12646168	LIEGSYPDTNR	LIEGSYPDTNR	243	11	4.07	1838	0	0	0	0	2334401	49369	Missing	423	2.0	b11y4*y7	155666	1137	131704296833136	91704296833136	0.0152	Red	3849	12646143	12646160	161639	2791	2791.00	2.00	2
1	NCDO2118_RS00010	DNA polymerase III subunit beta 2099:3241 forward MW:42264	Regular	3704703	1.54	422643292	19	9	25	11.05	184019	62010	15692	0	3	Pass2	PepFrag2	None	9334901	NAFQNALR	NAFQNALR	8	8	11.05	1844	1	1	0	0	3382404	50980		1165	1.7	y5*y8	165936	847	108230228267445	17646045653489	0.0132	Yellow	6225	9334549	9334564	184180	2422	2422.00	1.00	1
1	NCDO2118_RS00010	DNA polymerase III subunit beta 2099:3241 forward MW:42264	Regular	3704703	1.54	422643292	19	9	25	11.05	184019	62010	15692	0	4	Pass2	PepFrag2	None	15888329	NEESGFVQLITPVR	NEESGFVQLITPVR	364	14	4.26	1839	3	3	0	1	6673436	53931	Identified	328	2.0	b11b11*b14y3	291378	1473	156516982104189	116516982104189	0.0123	Yellow	17337	15888497	15888497	311782	2257	2257.00	2.00	2
1	NCDO2118_RS00010	DNA polymerase III subunit beta 2099:3241 forward MW:42264	Regular	3704703	1.54	422643292	19	9	25	11.05	184019	62010	15692	0	5	Pass2	PepFrag2	None	12777133	LLTVMTTNGTVK	LLTVMTTNGTVK	281	12	10.10	1845	1	1	0	0	1142044	46264		135	1.4	b7b10*y10	227790	1233	139017140768438	990171407684379	0.0057	Red	12542	12776604	12776620	243424	1053	1053.00	2.00	2
1	NCDO2118_RS00010	DNA polymerase III subunit beta 2099:3241 forward MW:42264	Regular	3704703	1.54	422643292	19	9	25	11.05	184019	62010	15692	0	6	Pass2	VarMod	Phosphoryl STY(15)	18838899	NEESGFVQLITPVRTN	NEESGFVQLITPVRTN	364	16	4.26	1843	3	3	0	0	1139190	46254	Identified	1232	9.3	b8*b10y2-H3PO4y3y5*y10y12	289140	1662	169634290687124	730895271247495	0.7252	Red	7638	18838826	18838836	196375	133450	133450.00	3.00	3
1	NCDO2118_RS00010	DNA polymerase III subunit beta 2099:3241 forward MW:42264	Regular	3704703	1.54	422643292	19	9	25	11.05	184019	62010	15692	0	7	Pass2	VarMod	Phosphoryl STY(7)	9984958	FDVILPSK	FDVILPSK	198	8	6.78	1841	1	1	0	0	1769395	48166	Missing	142	1.5	b4y4	235464	877	110770988111791	707709881117911	0.0090	Red	4945	9984920	9984944	171946	1649	1649.00	2.00	2
1	NCDO2118_RS00010	DNA polymerase III subunit beta 2099:3241 forward MW:42264	Regular	3704703	1.54	422643292	19	9	25	11.05	184019	62010	15692	0	8	Pass2	VarMod	Phosphoryl STY(7)	12366123	LLPLEDSELK	LLPLEDSELK	188	10	3.83	1840	2	2	0	0	1155360	46315	Missing	110	1.3	y5y9	249492	1103	129065442828005	890654428280055	0.0055	Red	14041	12366135	12366152	259534	1019	1019.00	2.00	2
1	NCDO2118_RS00010	DNA polymerase III subunit beta 2099:3241 forward MW:42264	Regular	3704703	1.54	422643292	19	9	25	11.05	184019	62010	15692	0	9	Pass2	VarMod	Phosphoryl STY(*);Phosphoryl STY(*)	14376459	LLTVMTTNGTVK	LLTVMTTNGTVK	281	12	10.10	1842	0	0	0	0	619151	43606		291	1.3	b6b8-H3PO4b9*b10-H3PO4b11	227790	1233	139017140768438	990171407684379	0.0045	Red	4360	14376348	14376357	166931	829	829.00	2.00	2
2	NCDO2118_RS00015	ATP-dependent helicase 3347:6646 forward MW:127070	Regular	1864100	1.45	1272970924	38	16	94	3.64	45327	16854	10930	1	1	Pass1	PepFrag1	None	16277962	SELGNFSVDDIYLR	SELGNFSVDDIYLR	878	14	3.70	3589	10	10	5	4	102766700	62823		2552	3.3	b2b3b5b5*b6b6*b7*b12b14y7y8y9y11y12	329367	1482	157153878346384	117153878346384	0.1957	Green	16493	16277968	16277978	317418	8869	8869.00	2.00	2
2	NCDO2118_RS00015	ATP-dependent helicase 3347:6646 forward MW:127070	Regular	1864100	1.45	1272970924	38	16	94	3.64	45327	16854	10930	0	2	Pass1	PepFrag1	None	11585790	LYASVSSFER	LYASVSSFER	752	10	7.00	3588	5	5	2	1	34291800	58057		752	1.8	b2b3y5y8y9	199102	1048	124738491959315	847384919593145	0.0522	Green	5672	11585767	11585793	214783	2367	2367.00	2.00	2
2	NCDO2118_RS00015	ATP-dependent helicase 3347:6646 forward MW:127070	Regular	1864100	1.45	1272970924	38	16	94	3.64	45327	16854	10930	0	3	Pass2	PepFrag2	None	15637901	YDGLVLEEAADQIK	YDGLVLEEAADQIK	980	14	3.59	3594	1	1	0	0	901530	42254		1950	2.8	b10y9y14	297943	1449	154812215031248	114812215031248	0.1239	Red	20477	15637728	15637742	379458	5615	5615.00	1.94	2
2	NCDO2118_RS00015	ATP-dependent helicase 3347:6646 forward MW:127070	Regular	1864100	1.45	1272970924	38	16	94	3.64	45327	16854	10930	0	4	Pass2	PepFrag2	None	8444775	VEIEGVAK	VEIEGVAK	304	8	4.26	3603	3	3	0	0	617493	40611		2483	1.9	b8y3y8	159361	802	104362036773135	168724073546271	0.0762	Red	6928	8444892	8444909	226587	3456	3456.00	1.00	1
2	NCDO2118_RS00015	ATP-dependent helicase 3347:6646 forward MW:127070	Regular	1864100	1.45	1272970924	38	16	94	3.64	45327	16854	10930	0	5	Pass2	PepFrag2	None	23331734	LQDAYDGLSLQFMTYLDVIK	LQDAYDGLSLQFMTYLDVIK	919	20	3.59	3601	2	2	1	0	3572785	48235		222	2.6	b8b9b10*	409330	2183	203452075516257	163452075516257	0.0725	Red	21481	23331093	23331051	409343	3285	3285.00	2.45	2
2	NCDO2118_RS00015	ATP-dependent helicase 3347:6646 forward MW:127070	Regular	1864100	1.45	1272970924	38	16	94	3.64	45327	16854	10930	0	6	Pass2	PepFrag2	None	19589930	ENLLGNDSPLQAFLGTNR	ENLLGNDSPLQAFLGTNR	441	18	4.07	3592	0	0	0	0	978064	42608	Missing	377	1.9	b12*y9*	320189	1800	178899023871932	138899023871932	0.0347	Red	19913	19590086	19590077	368160	1574	1574.00	2.00	2
2	NCDO2118_RS00015	ATP-dependent helicase 3347:6646 forward MW:127070	Regular	1864100	1.45	1272970924	38	16	94	3.64	45327	16854	10930	0	7	Pass2	PepFrag2	None	10215048	ETVSTDELK	ETVSTDELK	857	9	3.83	3593	2	2	0	0	807749	41777		837	1.4	y4y9	159906	932	115355128975284	190710257950569	0.0300	Red	7207	10214963	10214974	228809	1362	1362.00	1.00	1
2	NCDO2118_RS00015	ATP-dependent helicase 3347:6646 forward MW:127070	Regular	1864100	1.45	1272970924	38	16	94	3.64	45327	16854	10930	0	8	Pass2	PepFrag2	None	8314571	LLDLDSR	LLDLDSR	270	7	3.88	3590	1	1	0	0	10073830	52737		108	1.2	y5	180588	775	102006403548561	620064035485614	0.0268	Yellow	2887	8314546	8314574	184358	1215	1215.00	1.64	2
2	NCDO2118_RS00015	ATP-dependent helicase 3347:6646 forward MW:127070	Regular	1864100	1.45	1272970924	38	16	94	3.64	45327	16854	10930	0	9	Pass2	PepFrag2	None	10165623	TDDVVNLLK	TDDVVNLLK	381	9	3.88	3591	3	3	1	0	8937630	52217		134	1.3	y4y5y8	234108	964	11798070585263	779807058526301	0.0223	Yellow	9906	10165519	10165547	251812	1010	1010.00	2.00	2
2	NCDO2118_RS00015	ATP-dependent helicase 3347:6646 forward MW:127070	Regular	1864100	1.45	1272970924	38	16	94	3.64	45327	16854	10930	0	10	Pass2	PepFrag2	None	8974829	ISQGAFFK	ISQGAFFK	317	8	10.10	3602	1	1	0	0	268265	36990		92	1.2	b7	201558	831	106862906810347	173725813620694	0.0217	Red	9094	8974697	8974712	245352	983	983.00	1.00	1
2	NCDO2118_RS00015	ATP-dependent helicase 3347:6646 forward MW:127070	Regular	1864100	1.45	1272970924	38	16	94	3.64	45327	16854	10930	0	11	Pass2	MissedCleavage	None	14837328	YFRIWEAENQK	YFRIWEAENQK	293	11	7.03	3595	3	3	0	0	2285430	46294		259	1.7	b7y1y10	216366	1341	147020812808369	107020812808369	0.0424	Red	3193	14837168	14837185	188415	1920	1920.00	2.00	2
2	NCDO2118_RS00015	ATP-dependent helicase 3347:6646 forward MW:127070	Regular	1864100	1.45	1272970924	38	16	94	3.64	45327	16854	10930	0	12	Pass2	MissedCleavage	None	11536364	QKISQGAFFK	QKISQGAFFK	315	10	10.60	3596	1	1	0	0	1902069	45497		90	1.3	b4*b5	188094	1080	127264948037977	872649480379768	0.0228	Red	2035	11536237	11536263	172411	1032	1032.00	2.00	2
2	NCDO2118_RS00015	ATP-dependent helicase 3347:6646 forward MW:127070	Regular	1864100	1.45	1272970924	38	16	94	3.64	45327	16854	10930	0	13	Pass2	VarMod	Oxidation M(20)	30935237	SSAHSFKLQDAYDGLSLQFMTYLDVIK	SSAHSFKLQDAYDGLSLQFMTYLDVIK	912	27	5.19	3599	2	2	0	0	2334499	46387		367	3.3	b12b27y14	400280	2857	243425718816022	122283812544015	0.1032	Red	20957	30935238	30935170	391025	4677	4677.00	2.74	3
2	NCDO2118_RS00015	ATP-dependent helicase 3347:6646 forward MW:127070	Regular	1864100	1.45	1272970924	38	16	94	3.64	45327	16854	10930	0	14	Pass2	VarMod	Phosphoryl STY(1);Phosphoryl STY(3);Phosphoryl STY(10)	21239367	YIYAIGLSQTNFPRIK	YIYAIGLSQTNFPRIK	567	16	10.04	3598	2	2	0	0	4056164	48786	Missing	320	2.3	b9y11*y13y15	285700	1777	1773718051956	1373718051956	0.0620	Red	14913	21239361	21239338	301127	2811	2811.00	2.17	2
2	NCDO2118_RS00015	ATP-dependent helicase 3347:6646 forward MW:127070	Regular	1864100	1.45	1272970924	38	16	94	3.64	45327	16854	10930	0	15	Pass2	VarMod	Phosphoryl STY(2)	19629208	KSNIYNQEEFEQLLK	KSNIYNQEEFEQLLK	1002	15	4.56	3600	1	1	0	0	1123377	43210		206	2.2	b10-H3PO4b13y11*y13	283110	1738	174767020500638	134767020500638	0.0594	Red	15669	19629338	19629328	308452	2694	2694.00	2.00	2
2	NCDO2118_RS00015	ATP-dependent helicase 3347:6646 forward MW:127070	Regular	1864100	1.45	1272970924	38	16	94	3.64	45327	16854	10930	0	16	Pass2	VarMod	Phosphoryl STY(*);Phosphoryl STY(*)	25172500	ILLDLAKDIDTVNLSKETLDK	ILLDLAKDIDTVNLSKETLDK	726	21	4.12	3597	1	1	0	0	1673747	44942		181	2.4	b13*y8y10*y19*	315981	2273	209006242693931	993374951292875	0.0542	Red	18215	25172504	25172497	339307	2457	2457.00	2.72	3
3	NCDO2118_RS00020	ATP-dependent helicase 6639:10250 forward MW:138860	Regular	2432401	1.32	1389161909	43	22	119	8.73	149018	18447.43	42767	1	1	Pass1	PepFrag1	None	6724291	LIADLK	LIADLK	820	6	6.78	2704	4	4	1	1	9551312	53661		1782	2.7	b3y3y5y6	182705	665	921101305263869	144220261052774	0.0789	Yellow	5871	6724291	6724307	213733	11757	11757.00	1.00	1
3	NCDO2118_RS00020	ATP-dependent helicase 6639:10250 forward MW:138860	Regular	2432401	1.32	1389161909	43	22	119	8.73	149018	18447.43	42767	0	2	Pass1	PepFrag1	None	4703337	LPIK	LPIK	928	4	10.10	2706	6	6	4	2	115426900	64483	Identified	1676	0.0	b2b3y1y2y3y4	106418	473	73395099123788	106790198247576	0.0469	Green	3668	4703311	4703325	188552	6996	5062.43	1.00	1
3	NCDO2118_RS00020	ATP-dependent helicase 6639:10250 forward MW:138860	Regular	2432401	1.32	1389161909	43	22	119	8.73	149018	18447.43	42767	0	3	Pass1	PepFrag1	None	6463519	AASELR	AASELR	60	6	7.00	2700	4	4	1	1	3950490	49827		785	1.3	b4y1y2y6	94324	588	848550808472105	129710161694421	0.0109	Red	2021	6463522	6463538	163153	1628	1628.00	1.00	1
3	NCDO2118_RS00020	ATP-dependent helicase 6639:10250 forward MW:138860	Regular	2432401	1.32	1389161909	43	22	119	8.73	149018	18447.43	42767	0	4	Pass1	PepFrag1	None	9685564	VLYVAFTR	VLYVAFTR	864	8	9.84	2705	2	2	0	0	7673394	52710		703	1.5	y4y8	245981	918	114197015782606	188394031565211	0.0109	Yellow	9822	9685481	9685494	251862	1625	1625.00	1.51	1
3	NCDO2118_RS00020	ATP-dependent helicase 6639:10250 forward MW:138860	Regular	2432401	1.32	1389161909	43	22	119	8.73	149018	18447.43	42767	0	5	Pass1	PepFrag1	None	24492504	FNDRDLKEDVILSRENGLGMK	FNDRDLKEDVILSRENGLGMK	799	21	4.65	2703	0	0	0	0	1366470	45216		145	1.8	b8*	260709	2278	20931263614031	995417574268731	0.0073	Red	20248	24492481	24492463	384849	1093	1093.00	3.00	3
3	NCDO2118_RS00020	ATP-dependent helicase 6639:10250 forward MW:138860	Regular	2432401	1.32	1389161909	43	22	119	8.73	149018	18447.43	42767	0	6	Pass1	PepFrag1	None	11396419	QLQVGEIQPK	QLQVGEIQPK	1009	10	7.00	2707	0	0	0	0	2487646	47818	Identified	57	1.3	b8*	186804	1077	127029162964175	87029162964175	0.0060	Red	3721	11396415	11396440	189233	889	889.00	2.00	2
3	NCDO2118_RS00020	ATP-dependent helicase 6639:10250 forward MW:138860	Regular	2432401	1.32	1389161909	43	22	119	8.73	149018	18447.43	42767	0	7	Pass2	PepFrag2	None	9005149	ANLILDNK	ANLILDNK	254	8	6.78	2701	3	3	0	1	7882542	52827		1321	2.5	b3y4*y5y8	205950	857	109080431890802	690804318908022	0.0490	Yellow	1455	9005224	9005254	147601	7301	7301.00	1.81	2
3	NCDO2118_RS00020	ATP-dependent helicase 6639:10250 forward MW:138860	Regular	2432401	1.32	1389161909	43	22	119	8.73	149018	18447.43	42767	0	8	Pass2	PepFrag2	None	8704468	QSIYGFR	QSIYGFR	432	7	9.84	2718	1	1	0	0	1725780	46230		351	1.4	b2*y4y7*	177654	783	102707180900706	165414361801413	0.0108	Red	9152	8704498	8704512	246295	1605	1605.00	1.00	1
3	NCDO2118_RS00020	ATP-dependent helicase 6639:10250 forward MW:138860	Regular	2432401	1.32	1389161909	43	22	119	8.73	149018	18447.43	42767	0	9	Pass2	PepFrag2	None	12595799	METFPYMVNK	METFPYMVNK	841	10	6.89	2721	0	0	0	0	377442	39629	Missing	40	1.4	b6	233186	1152	13286011384771	928601138477099	0.0084	Red	13336	12596108	12596129	288790	1245	1245.00	2.00	2
3	NCDO2118_RS00020	ATP-dependent helicase 6639:10250 forward MW:138860	Regular	2432401	1.32	1389161909	43	22	119	8.73	149018	18447.43	42767	0	10	Pass2	PepFrag2	None	9745054	VNIDPNFR	VNIDPNFR	118	8	7.00	2719	2	2	1	0	1432932	45423	Missing	294	1.3	y5y6	183156	885	111443603897829	714436038978286	0.0077	Red	1729	9745239	9745268	157381	1144	1144.00	2.00	2
3	NCDO2118_RS00020	ATP-dependent helicase 6639:10250 forward MW:138860	Regular	2432401	1.32	1389161909	43	22	119	8.73	149018	18447.43	42767	0	11	Pass2	PepFrag2	None	8014465	NQIDIAK	NQIDIAK	1078	7	6.78	2720	2	2	0	0	1635855	45998		147	1.2	b6*y4y7	150979	751	998894431745382	159778886349076	0.0073	Red	6400	8014253	8014268	219229	1081	1081.00	1.00	1
3	NCDO2118_RS00020	ATP-dependent helicase 6639:10250 forward MW:138860	Regular	2432401	1.32	1389161909	43	22	119	8.73	149018	18447.43	42767	0	12	Pass2	PepFrag2	None	8314571	EDVILSR	EDVILSR	806	7	4.07	2702	4	4	0	0	1200579	44654		455	1.2	b3b7y1y7	198471	774	101918637223401	163837274446801	0.0071	Red	12961	8314452	8314467	284596	1053	1053.00	1.00	1
3	NCDO2118_RS00020	ATP-dependent helicase 6639:10250 forward MW:138860	Regular	2432401	1.32	1389161909	43	22	119	8.73	149018	18447.43	42767	0	13	Pass2	MissedCleavage	None	11436368	DKANLILDNK	DKANLILDNK	252	10	6.89	2709	1	1	0	0	2077501	47036		35	2.5	y3	187366	1083	127500514892981	875005148929811	0.0403	Red	5164	11436351	11436376	205851	6005	6005.00	2.00	2
3	NCDO2118_RS00020	ATP-dependent helicase 6639:10250 forward MW:138860	Regular	2432401	1.32	1389161909	43	22	119	8.73	149018	18447.43	42767	0	14	Pass2	MissedCleavage	None	30934800	KNENSFEYSDIAHFAIEILEENPDIR	KNENSFEYSDIAHFAIEILEENPDIR	364	26	4.01	2710	2	2	0	0	3455277	49245	Missing	207	3.2	b6b15y5y8	383304	2817	241148296772067	120765531181378	0.0287	Red	20468	30935174	30935061	391107	4277	4277.00	2.77	3
3	NCDO2118_RS00020	ATP-dependent helicase 6639:10250 forward MW:138860	Regular	2432401	1.32	1389161909	43	22	119	8.73	149018	18447.43	42767	0	15	Pass2	MissedCleavage	None	16818279	KSELDLYDNASLEGK	KSELDLYDNASLEGK	888	15	4.06	2712	2	2	0	0	6742028	52148		108	1.7	b4b9y5	234129	1540	161227869348147	121227869348147	0.0089	Yellow	7077	16818444	16818440	225324	1319	1319.00	2.26	2
3	NCDO2118_RS00020	ATP-dependent helicase 6639:10250 forward MW:138860	Regular	2432401	1.32	1389161909	43	22	119	8.73	149018	18447.43	42767	0	16	Pass2	MissedCleavage	None	24012293	FMEQNNDLASVNIKLPQNAVR	FMEQNNDLASVNIKLPQNAVR	755	21	7.03	2711	1	1	0	0	3985845	49866	Identified	104	1.6	b15	278241	2233	206546948387433	976979655916217	0.0059	Red	18566	24012287	24012275	354228	872	872.00	3.00	3
3	NCDO2118_RS00020	ATP-dependent helicase 6639:10250 forward MW:138860	Regular	2432401	1.32	1389161909	43	22	119	8.73	149018	18447.43	42767	0	17	Pass2	MissedCleavage	None	12546729	FEELIKNFSK	FEELIKNFSK	162	10	7.08	2708	1	1	0	0	5002716	50852		170	1.2	b8b8*b10*y9	235578	1175	134622673773012	946226737730121	0.0053	Yellow	12322	12546702	12546723	277479	787	787.00	2.00	2
3	NCDO2118_RS00020	ATP-dependent helicase 6639:10250 forward MW:138860	Regular	2432401	1.32	1389161909	43	22	119	8.73	149018	18447.43	42767	0	18	Pass2	VarMod	Phosphoryl STY(11)	20029845	EGQNPELINPSLENKLK	EGQNPELINPSLENKLK	663	17	4.56	2716	4	4	0	1	15071880	55642	Identified	31325	8.3	b8b9b10*b11-H3PO4b14b17y7-H3PO4y8-H3PO4y9y17	248905	1796	178633890022606	138633890022606	0.6165	Yellow	12299	20029904	20029871	277200	91873	91873.00	2.18	2
3	NCDO2118_RS00020	ATP-dependent helicase 6639:10250 forward MW:138860	Regular	2432401	1.32	1389161909	43	22	119	8.73	149018	18447.43	42767	0	19	Pass2	VarMod	Phosphoryl STY(*)	11646064	LFISTFTKK	LFISTFTKK	51	9	10.60	2713	1	1	0	0	392935	39804		1992	1.8	b7	206038	1047	124659129148931	846591291489308	0.0179	Red	6145	11646012	11646036	216598	2668	2668.00	2.00	2
3	NCDO2118_RS00020	ATP-dependent helicase 6639:10250 forward MW:138860	Regular	2432401	1.32	1389161909	43	22	119	8.73	149018	18447.43	42767	0	20	Pass2	VarMod	Oxidation M(5);Phosphoryl STY(19)	31584864	AQKIMNYEYPHQAATELSSIQTPSQVK	AQKIMNYEYPHQAATELSSIQTPSQVK	976	27	7.68	2717	1	1	0	0	1115196	44334	Missing	702	2.4	b4*b15*y7*y10y10	261811	2827	241718657313997	121145771542664	0.0122	Red	15524	31585124	31584998	312256	1822	1822.00	3.00	3
3	NCDO2118_RS00020	ATP-dependent helicase 6639:10250 forward MW:138860	Regular	2432401	1.32	1389161909	43	22	119	8.73	149018	18447.43	42767	0	21	Pass2	VarMod	Phosphoryl STY(*)	12795817	FTSSSTISEIK	FTSSSTISEIK	1149	11	7.00	2715	1	1	0	0	774050	42748		214	1.5	y5y9	191114	1105	129221413175377	892214131753769	0.0081	Red	11187	12795718	12795738	265209	1202	1202.00	2.00	2
3	NCDO2118_RS00020	ATP-dependent helicase 6639:10250 forward MW:138860	Regular	2432401	1.32	1389161909	43	22	119	8.73	149018	18447.43	42767	0	22	Pass2	VarMod	Phosphoryl STY(14)	19118710	GLEFDYVFLMNLQSR	GLEFDYVFLMNLQSR	784	15	4.07	2714	1	1	0	0	597733	41625		154	1.4	b10b10	406276	1691	171601879118007	131601879118007	0.0052	Red	11215	19118681	19118657	265548	776	776.00	2.00	2
6	NCDO2118_RS00035	GTP-binding protein 11336:12451 forward MW:41242	Regular	21999800	0	412419609	35	6	37	18.33	113754	102492	46494	1	1	Pass1	PepFrag1	None	15636908	VEEEISELEDDEK	VEEEISELEDDEK	247	13	3.33	181	18	18	16	6	427975700	79738		29278	6.9	b2b3b4b4b5b5b6b7b7b13y2y3y4y5y5y6y6y7y7y8y8y9y9y10y11y12y13	223475	1397	151085889207092	111085889207092	0.6367	Green	4888	15636903	15636901	201339	72422	72422.00	2.01	2
6	NCDO2118_RS00035	GTP-binding protein 11336:12451 forward MW:41242	Regular	21999800	0	412419609	35	6	37	18.33	113754	102492	46494	0	2	Pass1	PepFrag1	None	12125267	TIDFDEDETK	TIDFDEDETK	184	10	3.43	180	10	10	8	2	215389700	76756		11211	4.5	b2b3y3y4y5y6y7y8y9y10	185924	1071	126556934911502	865569349115019	0.2559	Green	4306	12125240	12125256	177798	29105	29105.00	2.00	2
6	NCDO2118_RS00035	GTP-binding protein 11336:12451 forward MW:41242	Regular	21999800	0	412419609	35	6	37	18.33	113754	102492	46494	0	3	Pass1	PepFrag1	None	17389262	TVPTTFEFTDIAGIVK	TVPTTFEFTDIAGIVK	62	16	4.07	182	1	1	0	0	19353610	66292	Identified	548	1.5	b9y14	385901	1640	16813399523446	12813399523446	0.0085	Yellow	7302	17389207	17389193	366208	965	965.00	2.00	2
6	NCDO2118_RS00035	GTP-binding protein 11336:12451 forward MW:41242	Regular	21999800	0	412419609	35	6	37	18.33	113754	102492	46494	0	4	Pass2	PepFrag2	None	10074826	ESGVDMLTR	ESGVDMLTR	270	9	4.07	184	2	2	0	0	3462037	58818		5152	2.7	b9y7y9	165094	915	113948084834664	187896169669328	0.0674	Yellow	3926	10074555	10074559	167331	7668	7668.00	1.00	1
6	NCDO2118_RS00035	GTP-binding protein 11336:12451 forward MW:41242	Regular	21999800	0	412419609	35	6	37	18.33	113754	102492	46494	0	5	Pass2	PepFrag2	None	22101604	AAYHLLGLATYFTAGEKEVR	AAYHLLGLATYFTAGEKEVR	279	20	7.69	183	2	2	0	0	4531873	59987		219	2.0	b8y10y10	374784	2063	195926171780229	906174478534861	0.0136	Yellow	7048	22101320	22101325	351261	1542	1542.00	3.00	3
6	NCDO2118_RS00035	GTP-binding protein 11336:12451 forward MW:41242	Regular	21999800	0	412419609	35	6	37	18.33	113754	102492	46494	0	6	Pass2	PepFrag2	None	16097023	AFDDENVMRENNR	AFDDENVMRENNR	105	13	4.06	185	2	2	1	0	991559	53387		86	1.3	b10b11	158518	1415	152380920983341	112380920983341	0.0069	Red	5456	16097230	16097226	241776	785	785.00	2.00	2
6	NCDO2118_RS00035	GTP-binding protein 11336:12451 forward MW:41242	Regular	21999800	0	412419609	35	6	37	18.33	113754	102492	46494	0	7	Pass2	InSource	None	9983949	DFDEDETK	TIDFDEDETK	186	8	3.43	180	0	0	0	0	3484309	0.0000		0	0.0		185924	854	108825719704185	177651439408369	0.0111	Green	4308	9983947	9983951	177864	1267	1267.00	1.00	1
6	NCDO2118_RS00035	GTP-binding protein 11336:12451 forward MW:41242	Regular	10328700	0	412419609	37	11	37	36.12	83621	54822	31058	1	1	Pass1	PepFrag1	None	12556239	AVTMSYDDLLK	AVTMSYDDLLK	326	11	3.88	1333	13	13	9	2	336417000	75409		19948	5.8	b2b3b3b9b11b11y1y2y3y4y5y6y7y7y8y9y9y10y11	254233	1168	134087469870706	940874698707061	0.6274	Green	11532	12556200	12556221	269116	52467	52467.00	1.97	2
6	NCDO2118_RS00035	GTP-binding protein 11336:12451 forward MW:41242	Regular	10328700	0	412419609	37	11	37	36.12	83621	54822	31058	0	2	Pass1	PepFrag1	None	11055888	DAVAEFNVLK	DAVAEFNVLK	161	10	4.07	1331	1	1	0	0	7711694	59012		335	1.4	y7y8	268524	1034	123625101174992	836251011749922	0.0147	Green	10879	11055852	11055878	261517	1233	1233.00	2.00	2
6	NCDO2118_RS00035	GTP-binding protein 11336:12451 forward MW:41242	Regular	10328700	0	412419609	37	11	37	36.12	83621	54822	31058	0	3	Pass1	PepFrag1	None	15636908	VEEEISELEDDEK	VEEEISELEDDEK	247	13	3.33	1332	3	3	0	0	943735	49889		197	1.5	b9y1y5y7	248057	1397	151085889207092	111085889207092	0.0134	Red	11504	15636788	15636792	268938	1122	1122.00	2.00	2
6	NCDO2118_RS00035	GTP-binding protein 11336:12451 forward MW:41242	Regular	10328700	0	412419609	37	11	37	36.12	83621	54822	31058	0	4	Pass2	PepFrag2	None	15586842	EYVGQDGDIMEFR	EYVGQDGDIMEFR	355	13	3.59	1334	1	1	0	0	3228959	55231		277	1.5	b11*b13y3y10	279766	1387	15036402466178	11036402466178	0.0133	Yellow	6477	15586698	15586703	219726	1112	1112.00	2.00	2
6	NCDO2118_RS00035	GTP-binding protein 11336:12451 forward MW:41242	Regular	10328700	0	412419609	37	11	37	36.12	83621	54822	31058	0	5	Pass2	MissedCleavage	None	13127583	LKPVLEDGKSAR	LKPVLEDGKSAR	172	12	9.88	1336	2	2	0	0	2314386	53785	Missing	3336	2.5	b10y12	115307	1249	140217190104078	100217190104078	0.0554	Yellow	2345	13127579	13127598	169221	4631	4631.00	2.00	2
6	NCDO2118_RS00035	GTP-binding protein 11336:12451 forward MW:41242	Regular	10328700	0	412419609	37	11	37	36.12	83621	54822	31058	0	6	Pass2	MissedCleavage	None	18739299	GMKAPQMAGIIHTDFEK	GMKAPQMAGIIHTDFEK	305	17	7.79	1338	1	1	0	0	984468	50072	Identified	501	2.2	b7*b15*y13*y16	241541	1746	175302910700427	135302910700427	0.0273	Red	14307	18739188	18739167	299770	2285	2285.00	2.00	2
6	NCDO2118_RS00035	GTP-binding protein 11336:12451 forward MW:41242	Regular	10328700	0	412419609	37	11	37	36.12	83621	54822	31058	0	7	Pass2	MissedCleavage	None	32225172	EFAATENAEVAVISARVEEEISELEDDEK	EFAATENAEVAVISARVEEEISELEDDEK	231	29	3.53	1337	1	1	0	0	2058134	53275		879	2.2	b11b15*b17b29	351083	2938	248005223750989	125336815833993	0.0168	Yellow	20154	32225592	32225454	382831	1409	1409.00	3.00	3
6	NCDO2118_RS00035	GTP-binding protein 11336:12451 forward MW:41242	Regular	10328700	0	412419609	37	11	37	36.12	83621	54822	31058	0	8	Pass2	MissedCleavage	None	22281128	EVDAIIHVVRAFDDENVMR	EVDAIIHVVRAFDDENVMR	95	19	4.20	1335	3	3	0	0	5174265	57279		1264	1.7	b7y5y13*y14y17*y19	323993	2062	195862852341298	155862852341298	0.0134	Green	17004	22281200	22281140	330529	1122	1122.00	2.48	2
6	NCDO2118_RS00035	GTP-binding protein 11336:12451 forward MW:41242	Regular	10328700	0	412419609	37	11	37	36.12	83621	54822	31058	0	9	Pass2	VarMod	Phosphoryl STY(*)	28943794	ESGVDMLTRAAYHLLGLATYFTAGEK	ESGVDMLTRAAYHLLGLATYFTAGEK	270	26	5.35	1341	3	3	0	0	1377840	51532		2269	4.4	b14y8y10y10y26	356431	2616	229536344321096	113024229547398	0.1265	Yellow	19134	28943667	28943587	364383	10582	10582.00	2.83	3
6	NCDO2118_RS00035	GTP-binding protein 11336:12451 forward MW:41242	Regular	10328700	0	412419609	37	11	37	36.12	83621	54822	31058	0	10	Pass2	VarMod	Oxidation M(4)	12716188	AVTMSYDDLLK	AVTMSYDDLLK	326	11	3.88	1340	2	2	0	0	5013654	57142		1047	2.4	b4b11y6y9	254233	1168	134087469870706	940874698707061	0.0546	Green	11531	12716208	12716228	269114	4563	4563.00	2.00	2
6	NCDO2118_RS00035	GTP-binding protein 11336:12451 forward MW:41242	Regular	10328700	0	412419609	37	11	37	36.12	83621	54822	31058	0	11	Pass2	VarMod	Phosphoryl STY(3)	13897501	ALTAGIVGLPNVGK	ALTAGIVGLPNVGK	1	14	10.10	1339	2	2	0	0	1723864	52505	Identified	142	1.5	b2b4-H3PO4y5y13*	258564	1274	142082062516004	102082062516004	0.0111	Yellow	11588	13897590	13897605	269747	932	932.00	2.00	2
6	NCDO2118_RS00035	GTP-binding protein 11336:12451 forward MW:41242	Regular	10328700	0	412419609	37	11	37	36.12	83621	54822	31058	0	12	Pass2	InSource	None	8534302	SYDDLLK	AVTMSYDDLLK	330	7	3.88	1333	3	3	1	0	4796689	0.0000		477	0.0	b4b5y7	254233	779	102357092088037	164714184176075	0.0144	Green	11543	8534347	8534362	269171	1203	1203.00	1.00	1
6	NCDO2118_RS00035	GTP-binding protein 11336:12451 forward MW:41242	Regular	10328700	0	412419609	37	11	37	36.12	83621	54822	31058	0	13	Pass2	InSource	None	9844707	MSYDDLLK	AVTMSYDDLLK	329	8	3.88	1333	2	2	0	0	1579022	0.0000		386	0.0	b6y8	254233	903	112949627001686	185899254003371	0.0115	Green	11538	9844738	9844751	269160	960	960.00	1.00	1
6	NCDO2118_RS00035	GTP-binding protein 11336:12451 forward MW:41242	Regular	46844230	0	412419609	103	17	37	54.99	402134	290930	153757	1	1	Pass1	PepFrag1	None	13097838	ALTAGIVGLPNVGK	ALTAGIVGLPNVGK	1	14	10.10	1167	16	16	8	4	432688800	83068	Identified	60151	9.5	b3b3b4b5b5b6b6b7b7b9b14y2y3y5y5*y6y7y8y9y10y12y14	255056	1274	142082062516004	102082062516004	0.4042	Green	14726	13097830	13097848	278703	162529	162529.00	1.95	2
6	NCDO2118_RS00035	GTP-binding protein 11336:12451 forward MW:41242	Regular	46844230	0	412419609	103	17	37	54.99	402134	290930	153757	0	2	Pass1	PepFrag1	None	17389262	TVPTTFEFTDIAGIVK	TVPTTFEFTDIAGIVK	62	16	4.07	1170	11	11	5	2	254240600	80759	Identified	41837	7.7	b2b3b5b5b8b9b11y6y7y9y10y12y13y14y14	366040	1640	16813399523446	12813399523446	0.1993	Green	33935	17389289	17389291	358356	80159	80159.00	2.01	2
6	NCDO2118_RS00035	GTP-binding protein 11336:12451 forward MW:41242	Regular	46844230	0	412419609	103	17	37	54.99	402134	290930	153757	0	3	Pass1	PepFrag1	None	10906143	AEFLEAIGLK	AEFLEAIGLK	260	10	4.26	1168	15	15	10	6	187174600	79429		13585	5.4	b2b3b4b5b6b6b7b9y1y3y4y5y6y6y7y8y9y9y10	307697	1042	124261935390167	842619353901674	0.1200	Green	21352	10906105	10906127	306656	48242	48242.00	1.86	2
6	NCDO2118_RS00035	GTP-binding protein 11336:12451 forward MW:41242	Regular	46844230	0	412419609	103	17	37	54.99	402134	290930	153757	0	4	Pass1	PepFrag1	None	9945568	STLFNAITK	STLFNAITK	15	9	10.10	1164	12	12	7	3	282888700	81223		11466	4.6	b2b2b3b5b6b8b9y2y3y4y5y5*y6y7y9	228731	940	116014303376569	760143033765691	0.0870	Green	7364	9945483	9945507	240390	34976	34976.00	1.90	2
6	NCDO2118_RS00035	GTP-binding protein 11336:12451 forward MW:41242	Regular	46844230	0	412419609	103	17	37	54.99	402134	290930	153757	0	5	Pass1	PepFrag1	None	12556239	AVTMSYDDLLK	AVTMSYDDLLK	326	11	3.88	1165	10	10	7	2	181097200	79286		10045	4.7	b2b3b3y3y4y5y6y7y7y8y8y9y11	276505	1168	134087469870706	940874698707061	0.0727	Green	11278	12556235	12556254	263404	29242	29242.00	1.96	2
6	NCDO2118_RS00035	GTP-binding protein 11336:12451 forward MW:41242	Regular	46844230	0	412419609	103	17	37	54.99	402134	290930	153757	0	6	Pass1	PepFrag1	None	18259483	AAYHLLGLATYFTAGEK	AAYHLLGLATYFTAGEK	279	17	7.68	1172	1	1	0	0	610161	54561		288	3.9	b11b14	323666	1701	172277744245453	132277744245453	0.0288	Red	40299	18259594	18259591	389878	11585	11585.00	2.00	2
6	NCDO2118_RS00035	GTP-binding protein 11336:12451 forward MW:41242	Regular	46844230	0	412419609	103	17	37	54.99	402134	290930	153757	0	7	Pass1	PepFrag1	None	34677832	SLFLLTSKPVLYVANVSEDEVGEPDNIEYVK	SLFLLTSKPVLYVANVSEDEVGEPDNIEYVK	197	31	3.82	1171	8	8	0	1	20293050	69780	Identified	5411	4.3	b4b11b14b26y5y8y9y10y13y17y23*y24*y31	455186	3249	265211758459678	136807838973119	0.0204	Green	47746	34677680	34677564	466249	8186	8186.00	3.13	3
6	NCDO2118_RS00035	GTP-binding protein 11336:12451 forward MW:41242	Regular	46844230	0	412419609	103	17	37	54.99	402134	290930	153757	0	8	Pass1	PepFrag1	None	22101604	AAYHLLGLATYFTAGEKEVR	AAYHLLGLATYFTAGEKEVR	279	20	7.69	1173	5	5	1	0	4209679	62949		470	3.1	b4b5b14y1y5	311862	2063	195926171780229	906174478534861	0.0131	Green	28387	22101415	22101420	335170	5271	5271.00	3.00	3
6	NCDO2118_RS00035	GTP-binding protein 11336:12451 forward MW:41242	Regular	46844230	0	412419609	103	17	37	54.99	402134	290930	153757	0	9	Pass1	PepFrag1	None	13487107	DKDAVAEFNVLK	DKDAVAEFNVLK	159	12	4.31	1169	5	5	2	0	3373190	61987		3821	2.5	b6b8b9b10b11*b12*y9y10*y11y12	315023	1260	141039252514436	101039252514436	0.0123	Green	30895	13487158	13487175	345587	4938	4938.00	1.90	2
6	NCDO2118_RS00035	GTP-binding protein 11336:12451 forward MW:41242	Regular	46844230	0	412419609	103	17	37	54.99	402134	290930	153757	0	10	Pass1	PepFrag1	None	15577730	APQMAGIIHTDFEK	APQMAGIIHTDFEK	308	14	5.22	1166	0	0	0	0	3051851	61552	Missing	128	1.4	b7*b8*	263335	1439	154099121719543	114099121719543	0.0023	Green	12609	15577679	15577690	268792	912	912.00	2.00	2
6	NCDO2118_RS00035	GTP-binding protein 11336:12451 forward MW:41242	Regular	46844230	0	412419609	103	17	37	54.99	402134	290930	153757	0	11	Pass2	PepFrag2	None	16488905	TAKDKDAVAEFNVLK	TAKDKDAVAEFNVLK	156	15	7.03	1180	1	1	0	0	2469843	60633		463	1.6	b5b13*y7y11*	205689	1555	162273111312066	122273111312066	0.0027	Green	3926	16488605	16488611	214436	1092	1092.00	2.00	2
6	NCDO2118_RS00035	GTP-binding protein 11336:12451 forward MW:41242	Regular	46844230	0	412419609	103	17	37	54.99	402134	290930	153757	0	12	Pass2	MissedCleavage	None	11266830	KLKPVLEDGK	KLKPVLEDGK	171	10	9.76	1174	0	0	0	0	1937427	59579	Missing	47	1.8	y5	275931	1096	128518802506381	885188025063809	0.0058	Yellow	28146	11266793	11266815	334314	2335	2335.00	2.00	2
6	NCDO2118_RS00035	GTP-binding protein 11336:12451 forward MW:41242	Regular	46844230	0	412419609	103	17	37	54.99	402134	290930	153757	0	13	Pass2	MissedCleavage	None	18739299	GMKAPQMAGIIHTDFEK	GMKAPQMAGIIHTDFEK	305	17	7.79	1177	4	4	1	0	2722650	61056	Missing	3323	1.9	b5b6b8*b15y1y2y7y11	271662	1746	175302910700427	135302910700427	0.0041	Green	7964	18739190	18739184	243852	1633	1633.00	2.00	2
6	NCDO2118_RS00035	GTP-binding protein 11336:12451 forward MW:41242	Regular	46844230	0	412419609	103	17	37	54.99	402134	290930	153757	0	14	Pass2	MissedCleavage	None	15527741	TIDFDEDETKVLK	TIDFDEDETKVLK	184	13	3.86	1175	2	2	1	0	7076370	65205		65	1.5	y10y11	253077	1435	153813422202609	113813422202609	0.0027	Green	14767	15527731	15527742	278906	1071	1071.00	2.00	2
6	NCDO2118_RS00035	GTP-binding protein 11336:12451 forward MW:41242	Regular	46844230	0	412419609	103	17	37	54.99	402134	290930	153757	0	15	Pass2	MissedCleavage	None	18198782	AVTMSYDDLLKYGSEK	AVTMSYDDLLKYGSEK	326	16	4.31	1179	1	1	0	0	6086680	64550		38	1.5	y12	256323	1674	170449842120481	130449842120481	0.0021	Green	10098	18198558	18198555	257074	853	853.00	2.00	2
6	NCDO2118_RS00035	GTP-binding protein 11336:12451 forward MW:41242	Regular	46844230	0	412419609	103	17	37	54.99	402134	290930	153757	0	16	Pass2	MissedCleavage	None	17288989	GFIRAVTMSYDDLLK	GFIRAVTMSYDDLLK	322	15	6.84	1178	2	2	0	0	3794494	62498		62	1.4	b3b11	348927	1623	166970076986799	713133846578658	0.0020	Green	35082	17289070	17289097	363700	812	812.00	3.00	3
6	NCDO2118_RS00035	GTP-binding protein 11336:12451 forward MW:41242	Regular	46844230	0	412419609	103	17	37	54.99	402134	290930	153757	0	17	Pass2	MissedCleavage	None	32225172	EFAATENAEVAVISARVEEEISELEDDEK	EFAATENAEVAVISARVEEEISELEDDEK	231	29	3.53	1176	2	2	0	0	5936031	64442		444	1.8	b3b12y3y5y10	383773	2938	248005223750989	840026118754947	0.0020	Green	39036	32225125	32225127	383296	792	792.00	3.57	4
6	NCDO2118_RS00035	GTP-binding protein 11336:12451 forward MW:41242	Regular	46844230	0	412419609	103	17	37	54.99	402134	290930	153757	0	18	Pass2	InSource	None	6933930	FNAITK	STLFNAITK	18	6	10.10	1164	6	6	2	2	27362910	0.0000		1612	0.0	b2b3b4y2y4y6	228731	650	907197556834765	141439511366953	0.0127	Green	7352	6933888	6933909	240331	5096	5096.00	1.00	1
6	NCDO2118_RS00035	GTP-binding protein 11336:12451 forward MW:41242	Regular	46844230	0	412419609	103	17	37	54.99	402134	290930	153757	0	19	Pass2	InSource	None	6844039	GLPNVGK	ALTAGIVGLPNVGK	8	7	10.10	1167	2	2	0	0	22030950	0.0000	Identified	501	0.0	y5y5*y7	255056	646	903471892958311	140694378591662	0.0060	Green	14734	6844009	6844031	278737	2410	2410.00	1.00	1
6	NCDO2118_RS00035	GTP-binding protein 11336:12451 forward MW:41242	Regular	3044611	0	412419609	23	6	37	22.10	25184	7348	14181	1	1	Pass1	PepFrag1	None	12125267	TIDFDEDETK	TIDFDEDETK	184	10	3.43	680	5	5	3	2	26372590	59047		1362	2.0	b2b3y6y7y8	195669	1071	126556934911502	865569349115019	0.1199	Yellow	3904	12125286	12125299	178246	3020	3020.00	2.00	2
6	NCDO2118_RS00035	GTP-binding protein 11336:12451 forward MW:41242	Regular	3044611	0	412419609	23	6	37	22.10	25184	7348	14181	0	2	Pass1	PepFrag1	None	15636908	VEEEISELEDDEK	VEEEISELEDDEK	247	13	3.33	681	7	7	2	3	15175250	56647		776	2.1	b2b3b5y8y10y11y13	247264	1397	151085889207092	111085889207092	0.1108	Yellow	4644	15636950	15636948	201361	2790	2790.00	2.00	2
6	NCDO2118_RS00035	GTP-binding protein 11336:12451 forward MW:41242	Regular	3044611	0	412419609	23	6	37	22.10	25184	7348	14181	0	3	Pass1	PepFrag1	None	17389262	TVPTTFEFTDIAGIVK	TVPTTFEFTDIAGIVK	62	16	4.07	684	2	2	0	0	28033040	59312	Identified	616	1.8	y9y10y14	375361	1640	16813399523446	12813399523446	0.0611	Green	7889	17389244	17389232	365380	1538	1538.00	2.00	2
6	NCDO2118_RS00035	GTP-binding protein 11336:12451 forward MW:41242	Regular	3044611	0	412419609	23	6	37	22.10	25184	7348	14181	0	4	Pass1	PepFrag1	None	22101604	AAYHLLGLATYFTAGEKEVR	AAYHLLGLATYFTAGEKEVR	279	20	7.69	683	1	1	0	0	5501683	52240		85	1.7	b8y8	313503	2063	195926171780229	906174478534861	0.0372	Yellow	7581	22101633	22101628	350340	937	937.00	3.00	3
6	NCDO2118_RS00035	GTP-binding protein 11336:12451 forward MW:41242	Regular	3044611	0	412419609	23	6	37	22.10	25184	7348	14181	0	5	Pass1	PepFrag1	None	13097838	ALTAGIVGLPNVGK	ALTAGIVGLPNVGK	1	14	10.10	682	2	2	1	0	4078189	50940	Missing	124	1.5	y7y8	271791	1274	142082062516004	102082062516004	0.0369	Red	6245	13097788	13097798	285981	930	930.00	2.00	2
6	NCDO2118_RS00035	GTP-binding protein 11336:12451 forward MW:41242	Regular	3044611	0	412419609	23	6	37	22.10	25184	7348	14181	0	6	Pass2	PepFrag2	None	10074826	ESGVDMLTR	ESGVDMLTR	270	9	4.07	685	6	6	0	0	5876592	52527		11218	3.5	b5b7b9b9y3y7y9	176810	915	113948084834664	187896169669328	0.6341	Yellow	2616	10074563	10074568	152742	15969	15969.00	1.03	1
6	NCDO2118_RS00035	GTP-binding protein 11336:12451 forward MW:41242	Regular	9570519	0	412419609	26	9	37	24.53	257481	46354	16537	1	1	Pass1	PepFrag1	None	13097838	ALTAGIVGLPNVGK	ALTAGIVGLPNVGK	1	14	10.10	922	13	13	8	4	219303800	73220	Identified	3421	3.5	b2b3b3b5b5b6b6b8y2y4y5y7y8y9y10y11y12	268257	1274	142082062516004	102082062516004	0.0414	Green	7022	13097826	13097847	280969	10653	10653.00	2.00	2
6	NCDO2118_RS00035	GTP-binding protein 11336:12451 forward MW:41242	Regular	9570519	0	412419609	26	9	37	24.53	257481	46354	16537	0	2	Pass1	PepFrag1	None	10906143	AEFLEAIGLK	AEFLEAIGLK	260	10	4.26	923	1	1	0	0	2853131	54363		232	2.0	y7	316454	1042	124261935390167	842619353901674	0.0114	Yellow	10261	10906085	10906110	310078	2935	2935.00	2.00	2
6	NCDO2118_RS00035	GTP-binding protein 11336:12451 forward MW:41242	Regular	9570519	0	412419609	26	9	37	24.53	257481	46354	16537	0	3	Pass1	PepFrag1	None	9945568	STLFNAITK	STLFNAITK	15	9	10.10	920	2	2	1	0	19499690	62710		222	1.4	y5y6	243192	940	116014303376569	760143033765691	0.0051	Green	4385	9945498	9945523	243625	1308	1308.00	2.00	2
6	NCDO2118_RS00035	GTP-binding protein 11336:12451 forward MW:41242	Regular	9570519	0	412419609	26	9	37	24.53	257481	46354	16537	0	4	Pass1	PepFrag1	None	12556239	AVTMSYDDLLK	AVTMSYDDLLK	326	11	3.88	921	1	1	0	0	10039380	59826		82	1.2	y9	275582	1168	134087469870706	940874698707061	0.0029	Green	5858	12556238	12556260	266762	754	754.00	2.00	2
6	NCDO2118_RS00035	GTP-binding protein 11336:12451 forward MW:41242	Regular	9570519	0	412419609	26	9	37	24.53	257481	46354	16537	0	5	Pass2	PepFrag2	None	22101604	AAYHLLGLATYFTAGEKEVR	AAYHLLGLATYFTAGEKEVR	279	20	7.69	927	3	3	0	0	1568989	51766		697	9.5	b6y3y6y11y17	332732	2063	195926171780229	155926171780229	0.4378	Yellow	21327	22102374	22102354	398496	112719	112719.00	2.00	2
6	NCDO2118_RS00035	GTP-binding protein 11336:12451 forward MW:41242	Regular	9570519	0	412419609	26	9	37	24.53	257481	46354	16537	0	6	Pass2	PepFrag2	None	20018858	EEGKEYVGQDGDIMEFR	EEGKEYVGQDGDIMEFR	351	17	3.82	925	0	0	0	0	1841314	52461		43	8.4	y5	239370	1788	178103031019338	787353540128918	0.3651	Yellow	4266	20019009	20019025	241994	93995	93995.00	2.88	3
6	NCDO2118_RS00035	GTP-binding protein 11336:12451 forward MW:41242	Regular	9570519	0	412419609	26	9	37	24.53	257481	46354	16537	0	7	Pass2	PepFrag2	None	11506579	EVDAIIHVVR	EVDAIIHVVR	95	10	5.22	924	4	4	1	0	9247075	59469		11008	4.7	b9b10y8y10	223041	1096	128518802506381	885188025063809	0.1273	Green	1499	11506424	11506448	192907	32766	32766.00	1.97	2
6	NCDO2118_RS00035	GTP-binding protein 11336:12451 forward MW:41242	Regular	9570519	0	412419609	26	9	37	24.53	257481	46354	16537	0	8	Pass2	PepFrag2	None	20790791	AEFLEAIGLKESGVDMLTR	AEFLEAIGLKESGVDMLTR	260	19	4.16	928	1	1	0	0	568151	47354		764	1.9	b7y9	372949	1957	189156027452395	861040183015968	0.0052	Red	12682	20790652	20790666	327118	1346	1346.00	3.00	3
6	NCDO2118_RS00035	GTP-binding protein 11336:12451 forward MW:41242	Regular	9570519	0	412419609	26	9	37	24.53	257481	46354	16537	0	9	Pass2	VarMod	Phosphoryl STY(6)	18998445	AVTMSYDDLLKYGSEK	AVTMSYDDLLKYGSEK	326	16	4.31	926	1	1	0	0	685448	48169		68	1.6	b8y11	255706	1674	170449842120481	130449842120481	0.0039	Red	26472	18998350	18998350	484352	1005	1005.00	2.00	2
6	NCDO2118_RS00035	GTP-binding protein 11336:12451 forward MW:41242	Regular	15233730	0	412419609	34	2	37	6.20	97816	145234.5	45254	1	1	Pass1	PepFrag1	None	15636908	VEEEISELEDDEK	VEEEISELEDDEK	247	13	3.33	31	22	22	18	8	400385100	77853		34303	6.9	b2b3b3b4b4b5b5b6b7b7b8b10b12b13y2y3y4y5y6y7y7y8y8y9y10y11y11y12y12y13	200992	1397	151085889207092	111085889207092	0.7246	Green	3954	15636894	15636909	200992	70876	70876.00	2.00	2
6	NCDO2118_RS00035	GTP-binding protein 11336:12451 forward MW:41242	Regular	15233730	0	412419609	34	2	37	6.20	97816	145234.5	45254	0	2	Pass1	PepFrag1	None	12125267	TIDFDEDETK	TIDFDEDETK	184	10	3.43	30	11	11	8	2	44670760	68328		10303	4.3	b2b3b10y2y3y4y5y6y7y8y8y9	176701	1071	126556934911502	865569349115019	0.2653	Green	3514	12125272	12125300	176701	25947	25947.00	2.00	2
6	NCDO2118_RS00035	GTP-binding protein 11336:12451 forward MW:41242	Regular	15233730	0	412419609	34	2	37	6.20	97816	145234.5	45254	0	3	Pass2	InSource	None	9983949	DFDEDETK	TIDFDEDETK	186	8	3.43	30	1	1	0	0	905416	0.0000		648	0.0	y8	176806	854	108825719704185	177651439408369	0.0102	Green	3517	9983927	9983938	176806	993	993.00	1.00	1
6	NCDO2118_RS00035	GTP-binding protein 11336:12451 forward MW:41242	Regular	14389070	0	412419609	42	11	37	25.61	115725	91487	50154	1	1	Pass1	PepFrag1	None	12556239	AVTMSYDDLLK	AVTMSYDDLLK	326	11	3.88	1509	16	16	11	4	441625200	78031		41559	6.9	b2b3b3b4b5b8b8b9b11y1y2y3y4y5y6y7y7y8y8y9y9y10y11	258411	1168	134087469870706	940874698707061	0.7264	Green	11602	12556136	12556160	268505	84068	84068.00	1.95	2
6	NCDO2118_RS00035	GTP-binding protein 11336:12451 forward MW:41242	Regular	14389070	0	412419609	42	11	37	25.61	115725	91487	50154	0	2	Pass1	PepFrag1	None	11506579	EVDAIIHVVR	EVDAIIHVVR	95	10	5.22	1506	5	5	3	0	23245640	65244		1294	2.1	b3y4y5y6y7y8y10	238038	1096	128518802506381	885188025063809	0.0328	Green	7043	11506517	11506543	227433	3797	3797.00	2.00	2
6	NCDO2118_RS00035	GTP-binding protein 11336:12451 forward MW:41242	Regular	14389070	0	412419609	42	11	37	25.61	115725	91487	50154	0	3	Pass1	PepFrag1	None	15577730	APQMAGIIHTDFEK	APQMAGIIHTDFEK	308	14	5.22	1510	1	1	0	0	2853884	56135	Identified	1476	2.4	b14y13y14	262184	1439	154099121719543	114099121719543	0.0313	Yellow	6545	15577815	15577828	222805	3622	3622.00	2.39	2
6	NCDO2118_RS00035	GTP-binding protein 11336:12451 forward MW:41242	Regular	14389070	0	412419609	42	11	37	25.61	115725	91487	50154	0	4	Pass1	PepFrag1	None	11055888	DAVAEFNVLK	DAVAEFNVLK	161	10	4.07	1507	3	3	1	0	9695410	61446		542	1.7	b2y6y7	262666	1034	123625101174992	836251011749922	0.0179	Green	10904	11055815	11055842	261088	2069	2069.00	2.00	2
6	NCDO2118_RS00035	GTP-binding protein 11336:12451 forward MW:41242	Regular	14389070	0	412419609	42	11	37	25.61	115725	91487	50154	0	5	Pass1	PepFrag1	None	15636908	VEEEISELEDDEK	VEEEISELEDDEK	247	13	3.33	1508	0	0	0	0	1552439	53490		192	1.6	b7y12	243965	1397	151085889207092	111085889207092	0.0119	Yellow	11599	15636822	15636835	268495	1374	1374.00	2.00	2
6	NCDO2118_RS00035	GTP-binding protein 11336:12451 forward MW:41242	Regular	14389070	0	412419609	42	11	37	25.61	115725	91487	50154	0	6	Pass2	PepFrag2	None	18259483	AAYHLLGLATYFTAGEK	AAYHLLGLATYFTAGEK	279	17	7.68	1515	3	3	0	1	4708034	58309		316	2.1	b12b13y5y17	317744	1701	172277744245453	132277744245453	0.0183	Green	16757	18259205	18259204	320697	2112	2112.00	2.00	2
6	NCDO2118_RS00035	GTP-binding protein 11336:12451 forward MW:41242	Regular	14389070	0	412419609	42	11	37	25.61	115725	91487	50154	0	7	Pass2	PepFrag2	None	15586842	EYVGQDGDIMEFR	EYVGQDGDIMEFR	355	13	3.59	1516	2	2	0	0	837385	50810		243	1.7	b9b13	273612	1387	15036402466178	11036402466178	0.0131	Yellow	6140	15586547	15586561	219318	1512	1512.00	2.00	2
6	NCDO2118_RS00035	GTP-binding protein 11336:12451 forward MW:41242	Regular	14389070	0	412419609	42	11	37	25.61	115725	91487	50154	0	8	Pass2	MissedCleavage	None	17288989	GFIRAVTMSYDDLLK	GFIRAVTMSYDDLLK	322	15	6.84	1512	4	4	0	0	3557537	57092		1635	2.8	b5b7b10b11b15y2y7y8y15	311562	1623	166970076986799	126970076986799	0.0455	Green	16182	17289142	17289147	313748	5268	5268.00	2.13	2
6	NCDO2118_RS00035	GTP-binding protein 11336:12451 forward MW:41242	Regular	14389070	0	412419609	42	11	37	25.61	115725	91487	50154	0	9	Pass2	MissedCleavage	None	18739299	GMKAPQMAGIIHTDFEK	GMKAPQMAGIIHTDFEK	305	17	7.79	1511	1	1	0	0	1280669	52655	Missing	432	1.6	b6*b8y7y10y17*	241757	1746	175302910700427	135302910700427	0.0092	Yellow	12589	18739416	18739412	278442	1060	1060.00	2.00	2
6	NCDO2118_RS00035	GTP-binding protein 11336:12451 forward MW:41242	Regular	14389070	0	412419609	42	11	37	25.61	115725	91487	50154	0	10	Pass2	VarMod	Oxidation M(4)	12716188	AVTMSYDDLLK	AVTMSYDDLLK	326	11	3.88	1513	3	3	1	0	6484500	59699		1321	2.8	b9b9b11y8y9y9	258411	1168	134087469870706	940874698707061	0.0628	Green	11596	12716200	12716223	268467	7269	7269.00	1.93	2
6	NCDO2118_RS00035	GTP-binding protein 11336:12451 forward MW:41242	Regular	14389070	0	412419609	42	11	37	25.61	115725	91487	50154	0	11	Pass2	VarMod	Phosphoryl STY(13)	19538962	GMKAPQMAGIIHTDFEK	GMKAPQMAGIIHTDFEK	305	17	7.79	1514	0	0	0	0	1037631	51741	Missing	99	1.6	b10*y16*	241757	1746	175302910700427	135302910700427	0.0090	Yellow	16155	19539045	19539036	313416	1046	1046.00	2.00	2
6	NCDO2118_RS00035	GTP-binding protein 11336:12451 forward MW:41242	Regular	14389070	0	412419609	42	11	37	25.61	115725	91487	50154	0	12	Pass2	InSource	None	8534302	SYDDLLK	AVTMSYDDLLK	330	7	3.88	1509	4	4	1	1	13181580	0.0000		1045	0.0	b4b5b5y2y7	258411	779	102357092088037	164714184176075	0.0218	Green	11604	8534311	8534327	268510	2528	2528.00	1.00	1
6	NCDO2118_RS00035	GTP-binding protein 11336:12451 forward MW:41242	Regular	28899410	0	412419609	88	18	37	38.81	456489	325287	139995	1	1	Pass1	PepFrag1	None	13097838	ALTAGIVGLPNVGK	ALTAGIVGLPNVGK	1	14	10.10	2109	14	14	7	4	250943500	78605	Identified	61424	10.3	b3b3b4b5b5b6b7b8b8y2y3y4*y5y6y8y9y10y11y12y14	255878	1274	142082062516004	102082062516004	0.4348	Green	16980	13097804	13097830	275909	198495	198495.00	1.96	2
6	NCDO2118_RS00035	GTP-binding protein 11336:12451 forward MW:41242	Regular	28899410	0	412419609	88	18	37	38.81	456489	325287	139995	0	2	Pass1	PepFrag1	None	17389262	TVPTTFEFTDIAGIVK	TVPTTFEFTDIAGIVK	62	16	4.07	2113	12	12	6	2	308363300	79500	Identified	44895	8.0	b2b3b5b7b11b13y2y4y5y6y9y11y12y13y14y14y16	359597	1640	16813399523446	12813399523446	0.1895	Green	36838	17389298	17389307	355898	86513	86513.00	2.02	2
6	NCDO2118_RS00035	GTP-binding protein 11336:12451 forward MW:41242	Regular	28899410	0	412419609	88	18	37	38.81	456489	325287	139995	0	3	Pass1	PepFrag1	None	10906143	AEFLEAIGLK	AEFLEAIGLK	260	10	4.26	2111	9	9	6	3	73758250	73287		8627	5.1	b3b4b5b6y5y6y7y8y10	312609	1042	124261935390167	842619353901674	0.0882	Green	24327	10906115	10906144	304001	40279	40279.00	1.87	2
6	NCDO2118_RS00035	GTP-binding protein 11336:12451 forward MW:41242	Regular	28899410	0	412419609	88	18	37	38.81	456489	325287	139995	0	4	Pass1	PepFrag1	None	12556239	AVTMSYDDLLK	AVTMSYDDLLK	326	11	3.88	2108	6	6	3	0	94907330	74382		9768	5.1	b4y3y4y7y8y9y11	270996	1168	134087469870706	940874698707061	0.0800	Green	13004	12556209	12556236	260756	36540	36540.00	1.93	2
6	NCDO2118_RS00035	GTP-binding protein 11336:12451 forward MW:41242	Regular	28899410	0	412419609	88	18	37	38.81	456489	325287	139995	0	5	Pass1	PepFrag1	None	22101604	AAYHLLGLATYFTAGEKEVR	AAYHLLGLATYFTAGEKEVR	279	20	7.69	2112	3	3	0	0	4015594	60646		3870	3.3	b12b20y5y10y12y14	315715	2063	195926171780229	906174478534861	0.0139	Green	33773	22101466	22101472	342308	6344	6344.00	2.56	3
6	NCDO2118_RS00035	GTP-binding protein 11336:12451 forward MW:41242	Regular	28899410	0	412419609	88	18	37	38.81	456489	325287	139995	0	6	Pass1	PepFrag1	None	18259483	AAYHLLGLATYFTAGEK	AAYHLLGLATYFTAGEK	279	17	7.68	2117	4	4	0	1	4032395	60665		713	2.8	b5b13y3y4y5y7y9	330584	1701	172277744245453	132277744245453	0.0105	Green	13870	18259394	18259399	264177	4776	4776.00	2.00	2
6	NCDO2118_RS00035	GTP-binding protein 11336:12451 forward MW:41242	Regular	28899410	0	412419609	88	18	37	38.81	456489	325287	139995	0	7	Pass1	PepFrag1	None	14408243	MALTAGIVGLPNVGK	MALTAGIVGLPNVGK	0	15	10.10	2110	3	3	0	0	10874960	64973	Missing	587	2.6	b4b7y7	291191	1398	151157980769917	111157980769917	0.0094	Green	18628	14408227	14408249	281842	4299	4299.00	2.00	2
6	NCDO2118_RS00035	GTP-binding protein 11336:12451 forward MW:41242	Regular	28899410	0	412419609	88	18	37	38.81	456489	325287	139995	0	8	Pass1	PepFrag1	None	11506579	EVDAIIHVVR	EVDAIIHVVR	95	10	5.22	2114	2	2	0	0	1330592	55849		491	1.5	b7b10y9	219444	1096	128518802506381	885188025063809	0.0033	Yellow	35977	11506564	11506593	351966	1524	1524.00	1.64	2
6	NCDO2118_RS00035	GTP-binding protein 11336:12451 forward MW:41242	Regular	28899410	0	412419609	88	18	37	38.81	456489	325287	139995	0	9	Pass1	PepFrag1	None	15577730	APQMAGIIHTDFEK	APQMAGIIHTDFEK	308	14	5.22	2118	3	3	0	0	4640385	61274	Identified	598	1.6	b13y2y7y13	258223	1439	154099121719543	114099121719543	0.0027	Green	40979	15577746	15577764	374885	1223	1223.00	2.00	2
6	NCDO2118_RS00035	GTP-binding protein 11336:12451 forward MW:41242	Regular	28899410	0	412419609	88	18	37	38.81	456489	325287	139995	0	10	Pass2	PepFrag2	None	20790791	AEFLEAIGLKESGVDMLTR	AEFLEAIGLKESGVDMLTR	260	19	4.16	2116	2	2	0	0	3677883	60265		367	4.0	b4b11b17	377189	1957	189156027452395	149156027452395	0.0248	Green	45050	20790577	20790564	395731	11301	11301.00	2.44	2
6	NCDO2118_RS00035	GTP-binding protein 11336:12451 forward MW:41242	Regular	28899410	0	412419609	88	18	37	38.81	456489	325287	139995	0	11	Pass2	PepFrag2	None	11055888	DAVAEFNVLK	DAVAEFNVLK	161	10	4.07	2115	1	1	0	0	2411712	58432		99	1.4	y7*y9	262832	1034	123625101174992	836251011749922	0.0026	Yellow	30699	11055739	11055768	330029	1173	1173.00	2.00	2
6	NCDO2118_RS00035	GTP-binding protein 11336:12451 forward MW:41242	Regular	28899410	0	412419609	88	18	37	38.81	456489	325287	139995	0	12	Pass2	PepFrag2	None	6523453	AWTFK	AWTFK	299	5	10.10	2125	3	3	1	0	1768491	57085		227	0.9	b3b4y3y5	141079	593	853354395412723	130670879082545	0.0017	Yellow	11614	6523558	6523581	254511	772	772.00	1.00	1
6	NCDO2118_RS00035	GTP-binding protein 11336:12451 forward MW:41242	Regular	28899410	0	412419609	88	18	37	38.81	456489	325287	139995	0	13	Pass2	MissedCleavage	None	38650270	SLFLLTSKPVLYVANVSEDEVGEPDNIEYVKQIR	SLFLLTSKPVLYVANVSEDEVGEPDNIEYVKQIR	197	34	4.13	2120	1	1	0	0	639036	52664	Missing	127	3.1	b16*y12	433761	3635	285822169255534	150548112837022	0.0065	Red	35507	38650397	38650162	349581	2955	2955.00	3.00	3
6	NCDO2118_RS00035	GTP-binding protein 11336:12451 forward MW:41242	Regular	28899410	0	412419609	88	18	37	38.81	456489	325287	139995	0	14	Pass2	MissedCleavage	None	13887645	GEGLGNKFLANIR	GEGLGNKFLANIR	82	13	10.12	2119	3	3	0	0	4568721	61207		2603	2.1	b3b4b8y4	229271	1302	144156298924752	104156298924752	0.0062	Green	13367	13887543	13887567	261985	2809	2809.00	2.00	2
6	NCDO2118_RS00035	GTP-binding protein 11336:12451 forward MW:41242	Regular	28899410	0	412419609	88	18	37	38.81	456489	325287	139995	0	15	Pass2	MissedCleavage	None	17288989	GFIRAVTMSYDDLLK	GFIRAVTMSYDDLLK	322	15	6.84	2122	5	5	3	0	7529205	63376		503	1.9	b10b14y3y6y7y8y9	341157	1623	166970076986799	126970076986799	0.0042	Green	31488	17289101	17289111	332967	1900	1900.00	2.25	2
6	NCDO2118_RS00035	GTP-binding protein 11336:12451 forward MW:41242	Regular	28899410	0	412419609	88	18	37	38.81	456489	325287	139995	0	16	Pass2	MissedCleavage	None	18739299	GMKAPQMAGIIHTDFEK	GMKAPQMAGIIHTDFEK	305	17	7.79	2121	3	3	0	0	2144120	57921	Missing	593	1.9	b8*y2y6y17	263113	1746	175302910700427	135302910700427	0.0033	Yellow	21798	18739372	18739373	294456	1494	1494.00	2.27	2
6	NCDO2118_RS00035	GTP-binding protein 11336:12451 forward MW:41242	Regular	28899410	0	412419609	88	18	37	38.81	456489	325287	139995	0	17	Pass2	VarMod	Phosphoryl STY(4);Phosphoryl STY(19)	22700505	TVPTTFEFTDIAGIVKGASR	TVPTTFEFTDIAGIVKGASR	62	20	7.03	2124	9	9	2	2	20150980	67652	Identified	2821	7.0	b2b6-H3PO4b7b8b12b14b15y9y11y12y14y16y18y20	307492	1976	190378365724434	150378365724434	0.1075	Green	50026	22700539	22700511	449432	49065	49065.00	2.11	2
6	NCDO2118_RS00035	GTP-binding protein 11336:12451 forward MW:41242	Regular	28899410	0	412419609	88	18	37	38.81	456489	325287	139995	0	18	Pass2	VarMod	Phosphoryl STY(4)	15207906	MALTAGIVGLPNVGK	MALTAGIVGLPNVGK	0	15	10.10	2123	0	0	0	0	2196420	58026	Identified	131	1.5	b13y5*	291191	1398	151157980769917	111157980769917	0.0022	Yellow	40974	15207948	15207967	374861	1026	1026.00	2.00	2
6	NCDO2118_RS00035	GTP-binding protein 11336:12451 forward MW:41242	Regular	28899410	0	412419609	88	18	37	38.81	456489	325287	139995	0	19	Pass2	InSource	None	9535778	GIVGLPNVGK	ALTAGIVGLPNVGK	5	10	10.10	2109	5	5	0	1	46075500	0.0000	Identified	1551	0.0	b5b8y5y8y10	255878	923	114611299011537	189222598023073	0.0088	Green	16972	9535726	9535748	275883	4001	4001.00	1.23	1
6	NCDO2118_RS00035	GTP-binding protein 11336:12451 forward MW:41242	Regular	25369940	0	412419609	45	6	37	17.25	109652	102119	50258	1	1	Pass1	PepFrag1	None	12125267	TIDFDEDETK	TIDFDEDETK	184	10	3.43	366	12	12	9	3	309338400	78948		31940	5.8	b2b3b3b8y2y3y3y4y5y5y6y7y7y8y8y9y10	196880	1071	126556934911502	865569349115019	0.5390	Green	5308	12125271	12125286	180286	59101	59101.00	1.97	2
6	NCDO2118_RS00035	GTP-binding protein 11336:12451 forward MW:41242	Regular	25369940	0	412419609	45	6	37	17.25	109652	102119	50258	0	2	Pass1	PepFrag1	None	15636908	VEEEISELEDDEK	VEEEISELEDDEK	247	13	3.33	367	17	17	13	6	433357900	80412		14293	5.6	b2b3b4b4b5b5b6b8b9b12y4y5y5y6y7y7y8y8y9y10y11y11y12y12y13	226472	1397	151085889207092	111085889207092	0.3752	Green	6355	15636917	15636921	204154	41144	41144.00	2.00	2
6	NCDO2118_RS00035	GTP-binding protein 11336:12451 forward MW:41242	Regular	25369940	0	412419609	45	6	37	17.25	109652	102119	50258	0	3	Pass1	PepFrag1	None	17389262	TVPTTFEFTDIAGIVK	TVPTTFEFTDIAGIVK	62	16	4.07	370	4	4	0	1	30052750	68822	Identified	1022	2.0	b2y8y11y14	377471	1640	16813399523446	12813399523446	0.0171	Yellow	9758	17389326	17389322	366009	1874	1874.00	2.00	2
6	NCDO2118_RS00035	GTP-binding protein 11336:12451 forward MW:41242	Regular	25369940	0	412419609	45	6	37	17.25	109652	102119	50258	0	4	Pass1	PepFrag1	None	12556239	AVTMSYDDLLK	AVTMSYDDLLK	326	11	3.88	368	4	4	2	0	3703123	59729		264	1.6	b2y6y7y8	276375	1168	134087469870706	940874698707061	0.0130	Yellow	7790	12556211	12556225	272972	1428	1428.00	2.00	2
6	NCDO2118_RS00035	GTP-binding protein 11336:12451 forward MW:41242	Regular	25369940	0	412419609	45	6	37	17.25	109652	102119	50258	0	5	Pass1	PepFrag1	None	13097838	ALTAGIVGLPNVGK	ALTAGIVGLPNVGK	1	14	10.10	369	4	4	1	0	9135935	63651	Missing	392	1.7	b2y7y8y10	267708	1274	142082062516004	102082062516004	0.0121	Yellow	8049	13097833	13097846	286826	1331	1331.00	2.00	2
6	NCDO2118_RS00035	GTP-binding protein 11336:12451 forward MW:41242	Regular	25369940	0	412419609	45	6	37	17.25	109652	102119	50258	0	6	Pass2	PepFrag2	None	22101604	AAYHLLGLATYFTAGEKEVR	AAYHLLGLATYFTAGEKEVR	279	20	7.69	371	1	1	0	0	1786527	56563		70	1.9	b5	333356	2063	195926171780229	906174478534861	0.0121	Red	9452	22101441	22101435	351152	1332	1332.00	3.00	3
6	NCDO2118_RS00035	GTP-binding protein 11336:12451 forward MW:41242	Regular	25369940	0	412419609	45	6	37	17.25	109652	102119	50258	0	7	Pass2	InSource	None	9983949	DFDEDETK	TIDFDEDETK	186	8	3.43	366	3	3	1	0	11736520	0.0000		2277	0.0	y5y6y8	196880	854	108825719704185	177651439408369	0.0314	Green	5307	9983935	9983934	180242	3442	3442.00	1.00	1
6	NCDO2118_RS00035	GTP-binding protein 11336:12451 forward MW:41242	Regular	7128975	0	412419609	22	6	37	9.70	57744	67038	23270	1	1	Pass1	PepFrag1	None	10074826	ESGVDMLTR	ESGVDMLTR	270	9	4.07	1252	11	11	8	2	286504000	73102		21015	5.0	b2b2b3b4b4b5y1y2y3y4y5y5y6y7y8y8y9	177182	915	113948084834664	739480848346641	0.7437	Green	5844	10074726	10074754	186554	42946	42946.00	1.94	2
6	NCDO2118_RS00035	GTP-binding protein 11336:12451 forward MW:41242	Regular	7128975	0	412419609	22	6	37	9.70	57744	67038	23270	0	2	Pass1	PepFrag1	None	22710710	LREEGKEYVGQDGDIMEFR	LREEGKEYVGQDGDIMEFR	349	19	4.13	1253	1	1	0	0	2181102	51917		112	2.0	y10*y13	242079	2060	195736182746551	155736182746551	0.0302	Yellow	13866	22710665	22710647	284169	1746	1746.00	2.36	2
6	NCDO2118_RS00035	GTP-binding protein 11336:12451 forward MW:41242	Regular	7128975	0	412419609	22	6	37	9.70	57744	67038	23270	0	3	Pass2	PepFrag2	None	12336838	DAVAEFNVLKK	DAVAEFNVLKK	161	11	7.00	1256	0	0	0	0	932285	48226		45	1.5	b6	233465	1169	13416399289791	941639928979102	0.0234	Red	9160	12336371	12336397	219919	1354	1354.00	2.00	2
6	NCDO2118_RS00035	GTP-binding protein 11336:12451 forward MW:41242	Regular	7128975	0	412419609	22	6	37	9.70	57744	67038	23270	0	4	Pass2	PepFrag2	None	15636908	VEEEISELEDDEK	VEEEISELEDDEK	247	13	3.33	1254	3	3	0	0	418135	44743		238	1.6	b6y1y9	206529	1397	151085889207092	607239261380616	0.0231	Red	3221	15636746	15636764	160087	1331	1331.00	2.62	3
6	NCDO2118_RS00035	GTP-binding protein 11336:12451 forward MW:41242	Regular	7128975	0	412419609	22	6	37	9.70	57744	67038	23270	0	5	Pass2	PepFrag2	None	15586842	EYVGQDGDIMEFR	EYVGQDGDIMEFR	355	13	3.59	1257	3	3	1	0	706319	47020		451	1.3	b9*y3y4y12y13	263041	1387	15036402466178	602426831078536	0.0137	Red	8812	15586457	15586475	216287	791	791.00	2.64	3
6	NCDO2118_RS00035	GTP-binding protein 11336:12451 forward MW:41242	Regular	7128975	0	412419609	22	6	37	9.70	57744	67038	23270	0	6	Pass2	MissedCleavage	None	10365574	EVRAWTFK	EVRAWTFK	296	8	10.12	1255	2	2	0	0	3150123	53514		170	2.5	b2y4	208409	955	117245238725829	772452387258288	0.1276	Yellow	6069	10365601	10365628	188783	7366	7366.00	2.00	2
6	NCDO2118_RS00035	GTP-binding protein 11336:12451 forward MW:41242	Regular	7128975	0	412419609	22	6	37	9.70	57744	67038	23270	0	7	Pass2	InSource	None	7914080	GVDMLTR	ESGVDMLTR	272	7	7.00	1252	2	2	0	0	1363596	0.0000		1239	0.0	y4y7	177182	733	982868954262199	15657379085244	0.0383	Green	5849	7914028	7914045	186598	2210	2210.00	1.00	1
6	NCDO2118_RS00035	GTP-binding protein 11336:12451 forward MW:41242	Regular	15418790	0	412419609	40	12	37	38.27	78836	57796	25488	1	1	Pass1	PepFrag1	None	12556239	AVTMSYDDLLK	AVTMSYDDLLK	326	11	3.88	927	15	15	11	3	487252000	78758		20056	5.8	b2b3b3b4b5b6b8b11y1y2y3y4y5y6y7y8y9y9y10y10y11	261552	1168	134087469870706	940874698707061	0.6635	Green	9898	12556154	12556178	268352	52310	52310.00	1.97	2
6	NCDO2118_RS00035	GTP-binding protein 11336:12451 forward MW:41242	Regular	15418790	0	412419609	40	12	37	38.27	78836	57796	25488	0	2	Pass1	PepFrag1	None	16778442	EFAATENAEVAVISAR	EFAATENAEVAVISAR	231	16	3.96	928	1	1	0	0	1273785	52931		172	2.5	b12y8	266560	1541	161297657411125	121297657411125	0.0468	Yellow	9261	16778342	16778345	259899	3691	3691.00	2.00	2
6	NCDO2118_RS00035	GTP-binding protein 11336:12451 forward MW:41242	Regular	15418790	0	412419609	40	12	37	38.27	78836	57796	25488	0	3	Pass1	PepFrag1	None	11506579	EVDAIIHVVR	EVDAIIHVVR	95	10	5.22	925	2	2	0	0	16475270	64049		222	1.6	y5y10	231564	1096	128518802506381	885188025063809	0.0228	Green	6090	11506544	11506570	227875	1795	1795.00	2.00	2
6	NCDO2118_RS00035	GTP-binding protein 11336:12451 forward MW:41242	Regular	15418790	0	412419609	40	12	37	38.27	78836	57796	25488	0	4	Pass1	PepFrag1	None	11055888	DAVAEFNVLK	DAVAEFNVLK	161	10	4.07	926	2	2	1	0	12287470	62775		211	1.3	y4*y6y7	262535	1034	123625101174992	836251011749922	0.0120	Green	9343	11055842	11055869	261080	946	946.00	2.00	2
6	NCDO2118_RS00035	GTP-binding protein 11336:12451 forward MW:41242	Regular	15418790	0	412419609	40	12	37	38.27	78836	57796	25488	0	5	Pass2	PepFrag2	None	22101604	AAYHLLGLATYFTAGEKEVR	AAYHLLGLATYFTAGEKEVR	279	20	7.69	929	1	1	0	0	2114217	55132		93	2.3	y9y10	304122	2063	195926171780229	906174478534861	0.0285	Yellow	13159	22101804	22101812	311490	2250	2250.00	2.75	3
6	NCDO2118_RS00035	GTP-binding protein 11336:12451 forward MW:41242	Regular	15418790	0	412419609	40	12	37	38.27	78836	57796	25488	0	6	Pass2	PepFrag2	None	7334355	FLANIR	FLANIR	89	6	11.05	936	2	2	1	0	1717769	54230		1466	1.3	b2b3b4*	176247	694	947689235915607	149537847183121	0.0188	Yellow	2460	7334181	7334199	181292	1485	1485.00	1.00	1
6	NCDO2118_RS00035	GTP-binding protein 11336:12451 forward MW:41242	Regular	15418790	0	412419609	40	12	37	38.27	78836	57796	25488	0	7	Pass2	MissedCleavage	None	17288989	GFIRAVTMSYDDLLK	GFIRAVTMSYDDLLK	322	15	6.84	933	4	4	1	0	3194589	56925		1000	2.6	b11y1y2y6y15	320508	1623	166970076986799	126970076986799	0.0530	Green	13330	17289098	17289098	313951	4178	4178.00	2.18	2
6	NCDO2118_RS00035	GTP-binding protein 11336:12451 forward MW:41242	Regular	15418790	0	412419609	40	12	37	38.27	78836	57796	25488	0	8	Pass2	MissedCleavage	None	18739299	GMKAPQMAGIIHTDFEK	GMKAPQMAGIIHTDFEK	305	17	7.79	932	2	2	0	0	708161	50382	Missing	763	2.5	b13b15y8y17	245846	1746	175302910700427	135302910700427	0.0446	Yellow	12138	18739134	18739123	299156	3513	3513.00	2.00	2
6	NCDO2118_RS00035	GTP-binding protein 11336:12451 forward MW:41242	Regular	15418790	0	412419609	40	12	37	38.27	78836	57796	25488	0	9	Pass2	MissedCleavage	None	13887645	GEGLGNKFLANIR	GEGLGNKFLANIR	82	13	10.12	930	4	4	2	0	1273876	52932		291	1.8	b6b7b7b8b10*b11	232905	1302	144156298924752	104156298924752	0.0221	Yellow	10801	13887712	13887730	280018	1742	1742.00	2.00	2
6	NCDO2118_RS00035	GTP-binding protein 11336:12451 forward MW:41242	Regular	15418790	0	412419609	40	12	37	38.27	78836	57796	25488	0	10	Pass2	MissedCleavage	None	11266830	KLKPVLEDGK	KLKPVLEDGK	171	10	9.76	931	3	3	1	1	931803	51574	Missing	567	1.4	b1y9y10	124648	1096	128518802506381	885188025063809	0.0147	Yellow	2313	11266707	11266734	178558	1156	1156.00	2.00	2
6	NCDO2118_RS00035	GTP-binding protein 11336:12451 forward MW:41242	Regular	15418790	0	412419609	40	12	37	38.27	78836	57796	25488	0	11	Pass2	VarMod	Oxidation M(4)	12716188	AVTMSYDDLLK	AVTMSYDDLLK	326	11	3.88	935	2	2	1	0	6293378	59869		214	2.0	y8y9	261552	1168	134087469870706	940874698707061	0.0358	Green	9885	12716186	12716209	268279	2824	2824.00	2.00	2
6	NCDO2118_RS00035	GTP-binding protein 11336:12451 forward MW:41242	Regular	15418790	0	412419609	40	12	37	38.27	78836	57796	25488	0	12	Pass2	VarMod	Phosphoryl STY(29)	35477495	SLFLLTSKPVLYVANVSEDEVGEPDNIEYVK	SLFLLTSKPVLYVANVSEDEVGEPDNIEYVK	197	31	3.82	934	0	0	0	0	2989546	56637	Identified	95	2.5	y8y9*y11*	415049	3249	265211758459678	926058792298392	0.0240	Green	15802	35477498	35477498	360280	1895	1895.00	4.00	4
6	NCDO2118_RS00035	GTP-binding protein 11336:12451 forward MW:41242	Regular	15418790	0	412419609	40	12	37	38.27	78836	57796	25488	0	13	Pass2	InSource	None	8534302	SYDDLLK	AVTMSYDDLLK	330	7	3.88	927	2	2	0	0	1790019	0.0000		338	0.0	b4y7	261552	779	102357092088037	164714184176075	0.0133	Green	9902	8534335	8534353	268382	1051	1051.00	1.00	1
6	NCDO2118_RS00035	GTP-binding protein 11336:12451 forward MW:41242	Regular	26285250	0	412419609	73	12	37	24.53	237752	192756	88687	1	1	Pass1	PepFrag1	None	13097838	ALTAGIVGLPNVGK	ALTAGIVGLPNVGK	1	14	10.10	1928	16	16	9	5	224028100	77700	Identified	36112	8.0	b3b3b4b5b5b6b6b7b7b9b12*b14y2y5y5*y6y7y8y9y10y10*y11y12y12y14	256575	1274	142082062516004	102082062516004	0.4232	Green	13717	13097785	13097817	277681	100627	100627.00	1.95	2
6	NCDO2118_RS00035	GTP-binding protein 11336:12451 forward MW:41242	Regular	26285250	0	412419609	73	12	37	24.53	237752	192756	88687	0	2	Pass1	PepFrag1	None	17389262	TVPTTFEFTDIAGIVK	TVPTTFEFTDIAGIVK	62	16	4.07	1931	12	12	6	0	246707300	78119	Identified	29831	7.2	b1b4b7b14y1y2y4y7y9y10y11y13y14y14y15y16	363127	1640	16813399523446	12813399523446	0.2750	Green	31603	17389260	17389277	357566	65393	65393.00	2.01	2
6	NCDO2118_RS00035	GTP-binding protein 11336:12451 forward MW:41242	Regular	26285250	0	412419609	73	12	37	24.53	237752	192756	88687	0	3	Pass1	PepFrag1	None	10906143	AEFLEAIGLK	AEFLEAIGLK	260	10	4.26	1930	11	11	7	4	179521700	76738		7202	4.4	b2b3b5b6b7y3y4y5y7y8y9y9y10	313387	1042	124261935390167	842619353901674	0.1125	Green	20315	10906108	10906143	306242	26736	26736.00	1.86	2
6	NCDO2118_RS00035	GTP-binding protein 11336:12451 forward MW:41242	Regular	26285250	0	412419609	73	12	37	24.53	237752	192756	88687	0	4	Pass1	PepFrag1	None	12556239	AVTMSYDDLLK	AVTMSYDDLLK	326	11	3.88	1927	8	8	4	2	66100950	72399		6622	4.1	b2b3b3b4b8y1y2y7y8y9y11	270965	1168	134087469870706	940874698707061	0.0865	Green	10528	12556250	12556284	262033	20562	20562.00	1.96	2
6	NCDO2118_RS00035	GTP-binding protein 11336:12451 forward MW:41242	Regular	26285250	0	412419609	73	12	37	24.53	237752	192756	88687	0	5	Pass1	PepFrag1	None	10074826	ESGVDMLTR	ESGVDMLTR	270	9	4.07	1933	4	4	0	0	3423456	59542		3097	2.6	b3b9y5y9	184287	915	113948084834664	187896169669328	0.0295	Green	14691	10074830	10074853	281969	7013	7013.00	1.07	1
6	NCDO2118_RS00035	GTP-binding protein 11336:12451 forward MW:41242	Regular	26285250	0	412419609	73	12	37	24.53	237752	192756	88687	0	6	Pass1	PepFrag1	None	13487107	DKDAVAEFNVLK	DKDAVAEFNVLK	159	12	4.31	1929	3	3	0	0	4828004	61035		303	2.1	b2b4y6y9y10	297316	1260	141039252514436	101039252514436	0.0122	Green	18935	13487057	13487088	300702	2907	2907.00	2.00	2
6	NCDO2118_RS00035	GTP-binding protein 11336:12451 forward MW:41242	Regular	26285250	0	412419609	73	12	37	24.53	237752	192756	88687	0	7	Pass1	PepFrag1	None	7334355	FLANIR	FLANIR	89	6	11.05	1932	2	2	0	0	1528063	56039		157	1.3	b2b4	165551	694	947689235915607	149537847183121	0.0064	Yellow	5250	7334326	7334352	227443	1532	1532.00	1.00	1
6	NCDO2118_RS00035	GTP-binding protein 11336:12451 forward MW:41242	Regular	26285250	0	412419609	73	12	37	24.53	237752	192756	88687	0	8	Pass2	PepFrag2	None	20790791	AEFLEAIGLKESGVDMLTR	AEFLEAIGLKESGVDMLTR	260	19	4.16	1934	3	3	0	0	2519789	58211		623	3.0	b5b6b15y6y19	378998	1957	189156027452395	149156027452395	0.0213	Yellow	29239	20790645	20790640	345919	5072	5072.00	2.00	2
6	NCDO2118_RS00035	GTP-binding protein 11336:12451 forward MW:41242	Regular	26285250	0	412419609	73	12	37	24.53	237752	192756	88687	0	9	Pass2	MissedCleavage	None	17288989	GFIRAVTMSYDDLLK	GFIRAVTMSYDDLLK	322	15	6.84	1935	5	5	2	0	1636550	56336		853	1.8	y1y2y6y12y13	337321	1623	166970076986799	126970076986799	0.0069	Yellow	34577	17288878	17288895	372357	1629	1629.00	2.27	2
6	NCDO2118_RS00035	GTP-binding protein 11336:12451 forward MW:41242	Regular	26285250	0	412419609	73	12	37	24.53	237752	192756	88687	0	10	Pass2	VarMod	Oxidation M(8);Phosphoryl STY(7)	18248601	GFIRAVTMSYDDLLK	GFIRAVTMSYDDLLK	322	15	6.84	1938	2	2	0	0	1296880	55326		2253	2.3	b7b8y10-H3PO4y15	337321	1623	166970076986799	126970076986799	0.0122	Yellow	29176	18248668	18248680	345698	2901	2901.00	2.00	2
6	NCDO2118_RS00035	GTP-binding protein 11336:12451 forward MW:41242	Regular	26285250	0	412419609	73	12	37	24.53	237752	192756	88687	0	11	Pass2	VarMod	Phosphoryl STY(8)	10745231	STLFNAITK	STLFNAITK	15	9	10.10	1937	2	2	1	0	2625133	58389		245	1.3	y2-H3PO4y6y7y7-H3PO4	235916	940	116014303376569	760143033765691	0.0044	Yellow	7549	10745211	10745246	243171	1036	1036.00	2.00	2
6	NCDO2118_RS00035	GTP-binding protein 11336:12451 forward MW:41242	Regular	26285250	0	412419609	73	12	37	24.53	237752	192756	88687	0	12	Pass2	VarMod	Phosphoryl STY(3)	13897501	ALTAGIVGLPNVGK	ALTAGIVGLPNVGK	1	14	10.10	1936	3	3	0	0	2881315	58793	Identified	1031	1.4	b2b3-H3PO4b4-H3PO4y5y9*y13	256575	1274	142082062516004	102082062516004	0.0036	Yellow	8037	13897420	13897450	246658	855	855.00	2.00	2
6	NCDO2118_RS00035	GTP-binding protein 11336:12451 forward MW:41242	Regular	26285250	0	412419609	73	12	37	24.53	237752	192756	88687	0	13	Pass2	InSource	None	6844039	GLPNVGK	ALTAGIVGLPNVGK	8	7	10.10	1928	2	2	0	0	9604679	0.0000	Identified	358	0.0	y5y5*y7	256575	646	903471892958311	140694378591662	0.0063	Green	13702	6843984	6844009	277571	1489	1489.00	1.00	1
6	NCDO2118_RS00035	GTP-binding protein 11336:12451 forward MW:41242	Regular	18006110	0	412419609	30	5	37	18.33	61456	52194	22909	1	1	Pass1	PepFrag1	None	15636908	VEEEISELEDDEK	VEEEISELEDDEK	247	13	3.33	170	19	19	16	7	458835500	79171		13592	5.7	b2b3b4b5b6b7b7b8b8b13y3y4y5y6y7y8y8y9y10y11y11y12y13	230760	1397	151085889207092	111085889207092	0.6862	Green	3294	15636913	15636922	201174	42172	42172.00	2.00	2
6	NCDO2118_RS00035	GTP-binding protein 11336:12451 forward MW:41242	Regular	18006110	0	412419609	30	5	37	18.33	61456	52194	22909	0	2	Pass1	PepFrag1	None	12125267	TIDFDEDETK	TIDFDEDETK	184	10	3.43	169	3	3	1	1	22421270	66061		2731	2.9	b2b3y8	188159	1071	126556934911502	865569349115019	0.1449	Green	2907	12125288	12125313	176626	8906	8906.00	2.00	2
6	NCDO2118_RS00035	GTP-binding protein 11336:12451 forward MW:41242	Regular	18006110	0	412419609	30	5	37	18.33	61456	52194	22909	0	3	Pass1	PepFrag1	None	22101604	AAYHLLGLATYFTAGEKEVR	AAYHLLGLATYFTAGEKEVR	279	20	7.69	171	3	3	1	0	2359303	56282		116	1.8	b4b5b8	328719	2063	195926171780229	906174478534861	0.0182	Yellow	5212	22101489	22101509	349846	1116	1116.00	3.00	3
6	NCDO2118_RS00035	GTP-binding protein 11336:12451 forward MW:41242	Regular	18006110	0	412419609	30	5	37	18.33	61456	52194	22909	0	4	Pass2	PepFrag2	None	10074826	ESGVDMLTR	ESGVDMLTR	270	9	4.07	173	4	4	0	0	2531507	56588		6012	2.7	b9y3y7y9	225608	915	113948084834664	187896169669328	0.1340	Yellow	2248	10074564	10074570	150122	8236	8236.00	1.00	1
6	NCDO2118_RS00035	GTP-binding protein 11336:12451 forward MW:41242	Regular	18006110	0	412419609	30	5	37	18.33	61456	52194	22909	0	5	Pass2	PepFrag2	None	17389262	TVPTTFEFTDIAGIVK	TVPTTFEFTDIAGIVK	62	16	4.07	172	1	1	0	0	26326460	66758	Identified	458	1.6	y14	371642	1640	16813399523446	12813399523446	0.0167	Green	5457	17389422	17389420	364735	1026	1026.00	2.00	2
6	NCDO2118_RS00035	GTP-binding protein 11336:12451 forward MW:41242	Regular	16098250	0	412419609	28	12	37	26.42	57779	40676	12474	1	1	Pass1	PepFrag1	None	12556239	AVTMSYDDLLK	AVTMSYDDLLK	326	11	3.88	754	12	12	8	2	516491400	79198		9864	4.8	b2b3b3b8b9b11y2y3y4y5y6y7y7y8y8y9y9y10y11	259598	1168	134087469870706	940874698707061	0.5432	Green	8186	12556217	12556237	268883	31387	31387.00	1.98	2
6	NCDO2118_RS00035	GTP-binding protein 11336:12451 forward MW:41242	Regular	16098250	0	412419609	28	12	37	26.42	57779	40676	12474	0	2	Pass1	PepFrag1	None	16778442	EFAATENAEVAVISAR	EFAATENAEVAVISAR	231	16	3.96	756	0	0	0	0	1717288	54416		78	3.2	b9	268365	1541	161297657411125	121297657411125	0.1183	Yellow	7667	16778369	16778369	260805	6837	6837.00	2.00	2
6	NCDO2118_RS00035	GTP-binding protein 11336:12451 forward MW:41242	Regular	16098250	0	412419609	28	12	37	26.42	57779	40676	12474	0	3	Pass1	PepFrag1	None	11506579	EVDAIIHVVR	EVDAIIHVVR	95	10	5.22	753	3	3	1	0	4262672	58365		244	1.8	b6y5y6	246169	1096	128518802506381	885188025063809	0.0424	Green	5125	11506519	11506542	228809	2452	2452.00	2.00	2
6	NCDO2118_RS00035	GTP-binding protein 11336:12451 forward MW:41242	Regular	16098250	0	412419609	28	12	37	26.42	57779	40676	12474	0	4	Pass1	PepFrag1	None	11055888	DAVAEFNVLK	DAVAEFNVLK	161	10	4.07	755	4	4	2	1	16963170	64363		455	1.4	b2y6y7y8	266133	1034	123625101174992	836251011749922	0.0215	Green	7722	11055813	11055837	261587	1243	1243.00	2.00	2
6	NCDO2118_RS00035	GTP-binding protein 11336:12451 forward MW:41242	Regular	16098250	0	412419609	28	12	37	26.42	57779	40676	12474	0	5	Pass2	PepFrag2	None	18259483	AAYHLLGLATYFTAGEK	AAYHLLGLATYFTAGEK	279	17	7.68	763	0	0	0	0	893934	51581		37	2.3	y11	320947	1701	172277744245453	132277744245453	0.0487	Yellow	15543	18259097	18259086	408857	2811	2811.00	2.00	2
6	NCDO2118_RS00035	GTP-binding protein 11336:12451 forward MW:41242	Regular	16098250	0	412419609	28	12	37	26.42	57779	40676	12474	0	6	Pass2	PepFrag2	None	9945568	STLFNAITK	STLFNAITK	15	9	10.10	764	0	0	0	0	533662	49340		188	1.7	b7*	223879	940	116014303376569	760143033765691	0.0415	Yellow	7263	9945750	9945776	255239	2398	2398.00	2.00	2
6	NCDO2118_RS00035	GTP-binding protein 11336:12451 forward MW:41242	Regular	16098250	0	412419609	28	12	37	26.42	57779	40676	12474	0	7	Pass2	PepFrag2	None	7334355	FLANIR	FLANIR	89	6	11.05	762	1	1	0	0	5218707	59243		32	1.2	y5	182719	694	947689235915607	149537847183121	0.0208	Green	2096	7334134	7334151	181760	1200	1200.00	1.00	1
6	NCDO2118_RS00035	GTP-binding protein 11336:12451 forward MW:41242	Regular	16098250	0	412419609	28	12	37	26.42	57779	40676	12474	0	8	Pass2	MissedCleavage	None	10365574	EVRAWTFK	EVRAWTFK	296	8	10.12	758	1	1	0	0	3043942	56902		87	1.7	y7	186229	955	117245238725829	772452387258288	0.0413	Green	4906	10365617	10365642	226075	2385	2385.00	2.00	2
6	NCDO2118_RS00035	GTP-binding protein 11336:12451 forward MW:41242	Regular	16098250	0	412419609	28	12	37	26.42	57779	40676	12474	0	9	Pass2	MissedCleavage	None	17288989	GFIRAVTMSYDDLLK	GFIRAVTMSYDDLLK	322	15	6.84	760	5	5	0	0	4449539	58551		1037	2.0	b7b10b12b15y2y6y15	314022	1623	166970076986799	713133846578658	0.0349	Green	10996	17289127	17289156	308117	2014	2014.00	2.72	3
6	NCDO2118_RS00035	GTP-binding protein 11336:12451 forward MW:41242	Regular	16098250	0	412419609	28	12	37	26.42	57779	40676	12474	0	10	Pass2	MissedCleavage	None	13887645	GEGLGNKFLANIR	GEGLGNKFLANIR	82	13	10.12	757	0	0	0	0	982079	51989		96	1.8	b8*	234173	1302	144156298924752	104156298924752	0.0306	Yellow	9848	13887680	13887695	292243	1767	1767.00	2.00	2
6	NCDO2118_RS00035	GTP-binding protein 11336:12451 forward MW:41242	Regular	16098250	0	412419609	28	12	37	26.42	57779	40676	12474	0	11	Pass2	MissedCleavage	None	18739299	GMKAPQMAGIIHTDFEK	GMKAPQMAGIIHTDFEK	305	17	7.79	759	1	1	0	0	375126	47810	Missing	31	1.5	b7	244064	1746	175302910700427	135302910700427	0.0138	Red	10989	18739475	18739460	308021	795	795.00	2.00	2
6	NCDO2118_RS00035	GTP-binding protein 11336:12451 forward MW:41242	Regular	16098250	0	412419609	28	12	37	26.42	57779	40676	12474	0	12	Pass2	VarMod	Oxidation M(4)	12716188	AVTMSYDDLLK	AVTMSYDDLLK	326	11	3.88	761	1	1	0	0	3171811	57081		325	1.9	y9	259598	1168	134087469870706	940874698707061	0.0431	Green	8182	12716205	12716224	268862	2490	2490.00	2.00	2
6	NCDO2118_RS00035	GTP-binding protein 11336:12451 forward MW:41242	Regular	34210220	0	412419609	65	12	37	40.70	202467	163629	69875	1	1	Pass1	PepFrag1	None	13097838	ALTAGIVGLPNVGK	ALTAGIVGLPNVGK	1	14	10.10	1165	18	18	12	6	638170500	83391	Identified	26209	7.3	b3b3b4b5b5b6b6b7b7b8b8b9b14y2y3y5y6y7y8y9y10y11y12y12y13*y14	260185	1274	142082062516004	102082062516004	0.3870	Green	10493	13097822	13097845	279470	78350	78350.00	1.97	2
6	NCDO2118_RS00035	GTP-binding protein 11336:12451 forward MW:41242	Regular	34210220	0	412419609	65	12	37	40.70	202467	163629	69875	0	2	Pass1	PepFrag1	None	17389262	TVPTTFEFTDIAGIVK	TVPTTFEFTDIAGIVK	62	16	4.07	1167	9	9	3	0	114124700	75915	Identified	25116	6.6	b5b11y2y4y9y10y11y12y12y14y16	371159	1640	16813399523446	12813399523446	0.2524	Green	26405	17389286	17389291	359433	51095	51095.00	2.02	2
6	NCDO2118_RS00035	GTP-binding protein 11336:12451 forward MW:41242	Regular	34210220	0	412419609	65	12	37	40.70	202467	163629	69875	0	3	Pass1	PepFrag1	None	10906143	AEFLEAIGLK	AEFLEAIGLK	260	10	4.26	1166	10	10	5	4	61499660	73230		7710	4.8	b2b3b6b7y3y4y5y7y8y9y10	312447	1042	124261935390167	842619353901674	0.1688	Green	15823	10906095	10906122	308597	34184	34184.00	1.90	2
6	NCDO2118_RS00035	GTP-binding protein 11336:12451 forward MW:41242	Regular	34210220	0	412419609	65	12	37	40.70	202467	163629	69875	0	4	Pass1	PepFrag1	None	9945568	STLFNAITK	STLFNAITK	15	9	10.10	1163	6	6	2	1	48753210	72222		3301	3.2	b2b2y3y5y6y7y9	228187	940	116014303376569	760143033765691	0.0634	Green	5117	9945511	9945540	240592	12836	12836.00	1.92	2
6	NCDO2118_RS00035	GTP-binding protein 11336:12451 forward MW:41242	Regular	34210220	0	412419609	65	12	37	40.70	202467	163629	69875	0	5	Pass1	PepFrag1	None	12556239	AVTMSYDDLLK	AVTMSYDDLLK	326	11	3.88	1164	5	5	2	1	55975430	72822		1823	2.4	b2y5y7y8y9	274890	1168	134087469870706	940874698707061	0.0236	Green	8016	12556230	12556255	264316	4781	4781.00	2.00	2
6	NCDO2118_RS00035	GTP-binding protein 11336:12451 forward MW:41242	Regular	34210220	0	412419609	65	12	37	40.70	202467	163629	69875	0	6	Pass1	PepFrag1	None	34677832	SLFLLTSKPVLYVANVSEDEVGEPDNIEYVK	SLFLLTSKPVLYVANVSEDEVGEPDNIEYVK	197	31	3.82	1169	4	4	0	0	5117098	62432	Missing	2421	2.9	b12y5y9*y15y27y31	456997	3249	265211758459678	136807838973119	0.0142	Green	37682	34677718	34677585	465016	2867	2867.00	3.00	3
6	NCDO2118_RS00035	GTP-binding protein 11336:12451 forward MW:41242	Regular	34210220	0	412419609	65	12	37	40.70	202467	163629	69875	0	7	Pass1	PepFrag1	None	22101604	AAYHLLGLATYFTAGEKEVR	AAYHLLGLATYFTAGEKEVR	279	20	7.69	1171	1	1	0	0	1665854	57558		1102	2.3	b19	331421	2063	195926171780229	155926171780229	0.0113	Yellow	20428	22101577	22101548	328542	2283	2283.00	2.00	2
6	NCDO2118_RS00035	GTP-binding protein 11336:12451 forward MW:41242	Regular	34210220	0	412419609	65	12	37	40.70	202467	163629	69875	0	8	Pass1	PepFrag1	None	20790791	AEFLEAIGLKESGVDMLTR	AEFLEAIGLKESGVDMLTR	260	19	4.16	1168	1	1	0	0	2003213	58359		38	1.7	y10	385277	1957	189156027452395	149156027452395	0.0053	Green	27133	20790857	20790840	363304	1067	1067.00	2.00	2
6	NCDO2118_RS00035	GTP-binding protein 11336:12451 forward MW:41242	Regular	34210220	0	412419609	65	12	37	40.70	202467	163629	69875	0	9	Pass2	PepFrag2	None	18259483	AAYHLLGLATYFTAGEK	AAYHLLGLATYFTAGEK	279	17	7.68	1170	0	0	0	0	1888054	58102		78	2.0	y8y9	341534	1701	172277744245453	132277744245453	0.0087	Green	7240	18259511	18259512	258429	1764	1764.00	2.00	2
6	NCDO2118_RS00035	GTP-binding protein 11336:12451 forward MW:41242	Regular	34210220	0	412419609	65	12	37	40.70	202467	163629	69875	0	10	Pass2	MissedCleavage	None	11266830	KLKPVLEDGK	KLKPVLEDGK	171	10	9.76	1172	0	0	0	0	2182641	58731	Missing	40	2.2	y5	287167	1096	128518802506381	885188025063809	0.0202	Green	21670	11266827	11266854	334435	4094	4094.00	2.00	2
6	NCDO2118_RS00035	GTP-binding protein 11336:12451 forward MW:41242	Regular	34210220	0	412419609	65	12	37	40.70	202467	163629	69875	0	11	Pass2	MissedCleavage	None	20310480	APQMAGIIHTDFEKGFIR	APQMAGIIHTDFEKGFIR	308	18	7.82	1173	1	1	0	0	1024528	55447	Missing	588	2.5	b11*y9y18*	328771	1894	185074371819657	83382914546438	0.0161	Yellow	25565	20310392	20310415	355149	3267	3267.00	3.00	3
6	NCDO2118_RS00035	GTP-binding protein 11336:12451 forward MW:41242	Regular	34210220	0	412419609	65	12	37	40.70	202467	163629	69875	0	12	Pass2	VarMod	Phosphoryl STY(10)	13927246	LKPVLEDGKSAR	LKPVLEDGKSAR	172	12	9.88	1174	3	3	0	1	4248920	61624	Missing	634	1.7	b10b12y2y8-H3PO4	163087	1249	140217190104078	100217190104078	0.0079	Green	23949	13927169	13927190	346670	1605	1605.00	2.00	2
6	NCDO2118_RS00035	GTP-binding protein 11336:12451 forward MW:41242	Regular	34210220	0	412419609	65	12	37	40.70	202467	163629	69875	0	13	Pass2	InSource	None	6933930	FNAITK	STLFNAITK	18	6	10.10	1163	3	3	1	0	3198679	0.0000		462	0.0	b2b3y6	228187	650	907197556834765	141439511366953	0.0077	Green	5112	6933877	6933897	240435	1569	1569.00	1.00	1
6	NCDO2118_RS00035	GTP-binding protein 11336:12451 forward MW:41242	Regular	34210220	0	412419609	65	12	37	40.70	202467	163629	69875	0	14	Pass2	InSource	None	8064771	LFNAITK	STLFNAITK	17	7	10.10	1163	3	3	0	0	3124359	0.0000		289	0.0	b3y5y7	228187	774	101918637223401	163837274446801	0.0076	Green	5100	8064774	8064793	240298	1540	1540.00	1.00	1
6	NCDO2118_RS00035	GTP-binding protein 11336:12451 forward MW:41242	Regular	34210220	0	412419609	65	12	37	40.70	202467	163629	69875	0	15	Pass2	InSource	None	6844039	GLPNVGK	ALTAGIVGLPNVGK	8	7	10.10	1165	1	1	0	0	18447580	0.0000	Identified	64	0.0	y5	260185	646	903471892958311	140694378591662	0.0058	Green	10462	6844033	6844052	279345	1165	1165.00	1.00	1
6	NCDO2118_RS00035	GTP-binding protein 11336:12451 forward MW:41242	Regular	8602575	0.56	412419609	32	11	37	26.68	292392	80454	58359	1	1	Pass1	PepFrag1	None	10074826	ESGVDMLTR	ESGVDMLTR	270	9	4.07	1244	10	10	8	1	325700800	74474		40734	6.1	b2b3b3b4b5b6y1y2y3y4y4y5y5y6y7y8y8y9	181725	915	113948084834664	739480848346641	0.2483	Green	6547	10074758	10074782	187175	72598	72598.00	1.92	2
6	NCDO2118_RS00035	GTP-binding protein 11336:12451 forward MW:41242	Regular	8602575	0.56	412419609	32	11	37	26.68	292392	80454	58359	0	2	Pass1	PepFrag1	None	22710710	LREEGKEYVGQDGDIMEFR	LREEGKEYVGQDGDIMEFR	349	19	4.13	1249	3	3	0	0	4056407	55428		282	3.0	b10b17y3y6y12y12*	243080	2060	195736182746551	155736182746551	0.0174	Yellow	16288	22710827	22710762	291971	5080	5080.00	2.48	2
6	NCDO2118_RS00035	GTP-binding protein 11336:12451 forward MW:41242	Regular	8602575	0.56	412419609	32	11	37	26.68	292392	80454	58359	0	3	Pass1	PepFrag1	None	15636908	VEEEISELEDDEK	VEEEISELEDDEK	247	13	3.33	1245	2	2	1	0	3901655	55259		222	2.1	b3b4b10	211128	1397	151085889207092	111085889207092	0.0095	Yellow	7991	15636927	15636928	199135	2776	2776.00	2.00	2
6	NCDO2118_RS00035	GTP-binding protein 11336:12451 forward MW:41242	Regular	8602575	0.56	412419609	32	11	37	26.68	292392	80454	58359	0	4	Pass1	PepFrag1	None	15586842	EYVGQDGDIMEFR	EYVGQDGDIMEFR	355	13	3.59	1246	1	1	0	0	5331873	56615		232	1.8	y9y10y11	267500	1387	15036402466178	11036402466178	0.0062	Green	13534	15586943	15586944	254030	1817	1817.00	2.00	2
6	NCDO2118_RS00035	GTP-binding protein 11336:12451 forward MW:41242	Regular	8602575	0.56	412419609	32	11	37	26.68	292392	80454	58359	0	5	Pass1	PepFrag1	None	16778442	EFAATENAEVAVISAR	EFAATENAEVAVISAR	231	16	3.96	1248	2	2	0	0	3054843	54196		166	1.9	b9y8y10	270713	1541	161297657411125	121297657411125	0.0058	Yellow	13277	16778459	16778452	251040	1709	1709.00	2.00	2
6	NCDO2118_RS00035	GTP-binding protein 11336:12451 forward MW:41242	Regular	8602575	0.56	412419609	32	11	37	26.68	292392	80454	58359	0	6	Pass1	PepFrag1	None	12125267	TIDFDEDETK	TIDFDEDETK	184	10	3.43	1243	1	1	0	0	1306562	50508		395	1.3	y9y10	185703	1071	126556934911502	865569349115019	0.0032	Yellow	3422	12125312	12125330	157221	928	928.00	2.00	2
6	NCDO2118_RS00035	GTP-binding protein 11336:12451 forward MW:41242	Regular	8602575	0.56	412419609	32	11	37	26.68	292392	80454	58359	0	7	Pass2	PepFrag2	None	7334355	FLANIR	FLANIR	89	6	11.05	1247	0	0	0	0	199620	42348		30	1.7	y5*	189722	694	947689235915607	149537847183121	0.0112	Red	2192	7334411	7334428	141967	3267	3267.00	1.00	1
6	NCDO2118_RS00035	GTP-binding protein 11336:12451 forward MW:41242	Regular	8602575	0.56	412419609	32	11	37	26.68	292392	80454	58359	0	8	Pass2	MissedCleavage	None	15527741	TIDFDEDETKVLK	TIDFDEDETKVLK	184	13	3.86	1250	2	2	0	0	10260330	59458		5839	7.8	b11y13	244441	1435	153813422202609	113813422202609	0.3485	Green	13035	15527551	15527553	248499	101886	101886.00	1.98	2
6	NCDO2118_RS00035	GTP-binding protein 11336:12451 forward MW:41242	Regular	8602575	0.56	412419609	32	11	37	26.68	292392	80454	58359	0	9	Pass2	VarMod	Oxidation M(6)	10234775	ESGVDMLTR	ESGVDMLTR	270	9	4.07	1251	4	4	0	0	13545800	60664		4407	6.2	b3b9y5y9	181725	915	113948084834664	187896169669328	0.2643	Green	3343	10234756	10234769	156457	77281	77281.00	1.27	1
6	NCDO2118_RS00035	GTP-binding protein 11336:12451 forward MW:41242	Regular	8602575	0.56	412419609	32	11	37	26.68	292392	80454	58359	0	10	Pass2	VarMod	Phosphoryl STY(10)	21110143	APQMAGIIHTDFEKGFIR	APQMAGIIHTDFEKGFIR	308	18	7.82	1252	2	2	1	0	4932436	56277	Identified	2240	4.0	b10*b11-H3PO4b16y17y18	306419	1894	185074371819657	145074371819657	0.0397	Green	10516	21110172	21110125	222290	11601	11601.00	2.22	2
6	NCDO2118_RS00035	GTP-binding protein 11336:12451 forward MW:41242	Regular	8602575	0.56	412419609	32	11	37	26.68	292392	80454	58359	0	11	Pass2	VarMod	Phosphoryl STY(*)	18088652	GFIRAVTMSYDDLLK	GFIRAVTMSYDDLLK	322	15	6.84	1253	1	1	0	0	1361637	50687		185	2.0	y9y9-H3PO4y11-H3PO4	335780	1623	166970076986799	126970076986799	0.0071	Yellow	16158	18088720	18088703	289568	2083	2083.00	2.00	2
6	NCDO2118_RS00035	GTP-binding protein 11336:12451 forward MW:41242	Regular	8602575	0.56	412419609	32	11	37	26.68	292392	80454	58359	0	12	Pass2	InSource	None	6353181	DMLTR	ESGVDMLTR	274	5	7.00	1244	4	4	1	0	20521300	0.0000		3627	0.0	b3b5y4y5	181725	580	840836643499463	128167328699893	0.0389	Green	6526	6353123	6353139	186943	11366	11366.00	1.00	1
6	NCDO2118_RS00035	GTP-binding protein 11336:12451 forward MW:41242	Regular	4861606	0.78	412419609	45	13	37	25.88	307539	38336	92638	1	1	Pass1	PepFrag1	None	10074826	ESGVDMLTR	ESGVDMLTR	270	9	4.07	1792	8	8	5	0	80539380	65928		9031	4.1	b2b3b3b4b5y2y3y4y5y5y7y8y9	182846	915	113948084834664	739480848346641	0.0827	Green	6718	10074758	10074790	185779	25428	25428.00	1.95	2
6	NCDO2118_RS00035	GTP-binding protein 11336:12451 forward MW:41242	Regular	4861606	0.78	412419609	45	13	37	25.88	307539	38336	92638	0	2	Pass1	PepFrag1	None	12125267	TIDFDEDETK	TIDFDEDETK	184	10	3.43	1797	1	1	0	0	639858	44929		2230	3.1	y4y10	197716	1071	126556934911502	865569349115019	0.0326	Red	3073	12125301	12125332	153260	10013	10013.00	2.00	2
6	NCDO2118_RS00035	GTP-binding protein 11336:12451 forward MW:41242	Regular	4861606	0.78	412419609	45	13	37	25.88	307539	38336	92638	0	3	Pass1	PepFrag1	None	16778442	EFAATENAEVAVISAR	EFAATENAEVAVISAR	231	16	3.96	1794	9	9	6	0	55726530	64328		582	2.3	b5b9b10*y3y6y7y8y9y10y11y13y14	255219	1541	161297657411125	121297657411125	0.0094	Green	14265	16778392	16778413	249511	2895	2895.00	2.00	2
6	NCDO2118_RS00035	GTP-binding protein 11336:12451 forward MW:41242	Regular	4861606	0.78	412419609	45	13	37	25.88	307539	38336	92638	0	4	Pass1	PepFrag1	None	15586842	EYVGQDGDIMEFR	EYVGQDGDIMEFR	355	13	3.59	1795	3	3	0	0	7067982	55361		355	1.7	b2b2b10*b12y6y10	260385	1387	15036402466178	11036402466178	0.0053	Yellow	14616	15586868	15586893	252461	1618	1618.00	2.00	2
6	NCDO2118_RS00035	GTP-binding protein 11336:12451 forward MW:41242	Regular	4861606	0.78	412419609	45	13	37	25.88	307539	38336	92638	0	5	Pass1	PepFrag1	None	15636908	VEEEISELEDDEK	VEEEISELEDDEK	247	13	3.33	1793	3	3	0	0	2773359	51298		317	1.6	b3b6y6y8y11	224082	1397	151085889207092	111085889207092	0.0044	Yellow	8317	15636919	15636944	197441	1361	1361.00	2.00	2
6	NCDO2118_RS00035	GTP-binding protein 11336:12451 forward MW:41242	Regular	4861606	0.78	412419609	45	13	37	25.88	307539	38336	92638	0	6	Pass2	PepFrag2	None	7334355	FLANIR	FLANIR	89	6	11.05	1796	5	5	2	0	8368463	56094		68366	4.0	b5b6y2y3y5*y6	180510	694	947689235915607	149537847183121	0.4891	Yellow	1889	7334404	7334430	136510	150410	150410.00	1.01	1
6	NCDO2118_RS00035	GTP-binding protein 11336:12451 forward MW:41242	Regular	4861606	0.78	412419609	45	13	37	25.88	307539	38336	92638	0	7	Pass2	PepFrag2	None	10964728	AFDDENVMR	AFDDENVMR	105	9	3.70	1804	1	1	0	0	292239	41525		3209	2.7	b5y9	196675	966	118143831644999	781438316449989	0.0251	Red	11220	10964368	10964400	220811	7720	7720.00	1.90	2
6	NCDO2118_RS00035	GTP-binding protein 11336:12451 forward MW:41242	Regular	4861606	0.78	412419609	45	13	37	25.88	307539	38336	92638	0	8	Pass2	MissedCleavage	None	15527741	TIDFDEDETKVLK	TIDFDEDETKVLK	184	13	3.86	1798	2	2	0	0	6445681	54960		3768	6.7	b11y13	244647	1435	153813422202609	113813422202609	0.2112	Yellow	14032	15527550	15527575	247423	64952	64952.00	1.99	2
6	NCDO2118_RS00035	GTP-binding protein 11336:12451 forward MW:41242	Regular	4861606	0.78	412419609	45	13	37	25.88	307539	38336	92638	0	9	Pass2	MissedCleavage	None	10365574	EVRAWTFK	EVRAWTFK	296	8	10.12	1799	2	2	0	0	8737105	56281		230	2.0	y1y4	196450	955	117245238725829	772452387258288	0.0132	Yellow	7035	10365603	10365635	188081	4061	4061.00	2.00	2
6	NCDO2118_RS00035	GTP-binding protein 11336:12451 forward MW:41242	Regular	4861606	0.78	412419609	45	13	37	25.88	307539	38336	92638	0	10	Pass2	VarMod	Phosphoryl STY(8);Phosphoryl STY(17)	22350206	QIREFAATENAEVAVISAR	QIREFAATENAEVAVISAR	228	19	4.56	1801	4	4	0	1	2637473	51080		2319	5.2	b5*b5b13b15b19y4y6y7-H3PO4y9y15	269484	1927	187217932097617	536089660488087	0.0755	Yellow	17323	22350076	22350076	293983	23217	23217.00	4.00	4
6	NCDO2118_RS00035	GTP-binding protein 11336:12451 forward MW:41242	Regular	4861606	0.78	412419609	45	13	37	25.88	307539	38336	92638	0	11	Pass2	VarMod	Phosphoryl STY(*)	10745231	STLFNAITK	STLFNAITK	15	9	10.10	1800	2	2	0	0	975065	46758		1674	2.8	b3b5y9	208554	940	116014303376569	760143033765691	0.0275	Red	10790	10745133	10745165	217336	8467	8467.00	1.67	2
6	NCDO2118_RS00035	GTP-binding protein 11336:12451 forward MW:41242	Regular	4861606	0.78	412419609	45	13	37	25.88	307539	38336	92638	0	12	Pass2	VarMod	Oxidation M(4);Phosphoryl STY(5)	13515851	AVTMSYDDLLK	AVTMSYDDLLK	326	11	3.88	1802	3	3	0	0	2857740	51428		222	2.2	b10y7y10-H3PO4y11	250799	1168	134087469870706	940874698707061	0.0122	Yellow	18176	13515891	13515921	311173	3745	3745.00	1.80	2
6	NCDO2118_RS00035	GTP-binding protein 11336:12451 forward MW:41242	Regular	4861606	0.78	412419609	45	13	37	25.88	307539	38336	92638	0	13	Pass2	VarMod	Oxidation M(8);Phosphoryl STY(9)	18248601	GFIRAVTMSYDDLLK	GFIRAVTMSYDDLLK	322	15	6.84	1803	2	2	0	0	1896582	49648		335	2.5	b12y8-H3PO4y11y14-H3PO4	318032	1623	166970076986799	126970076986799	0.0119	Yellow	17271	18248635	18248650	293050	3652	3652.00	2.00	2
6	NCDO2118_RS00035	GTP-binding protein 11336:12451 forward MW:41242	Regular	5057384	1.06	412419609	23	9	37	19.14	179025	26284	60532	1	1	Pass1	PepFrag1	None	10074826	ESGVDMLTR	ESGVDMLTR	270	9	4.07	1220	9	9	7	1	167272700	69274		9927	4.0	b2b2b3b4b5y2y3y4y5y5y6y7y8y9	180793	915	113948084834664	739480848346641	0.1257	Green	4847	10074780	10074804	186249	22507	22507.00	1.94	2
6	NCDO2118_RS00035	GTP-binding protein 11336:12451 forward MW:41242	Regular	5057384	1.06	412419609	23	9	37	19.14	179025	26284	60532	0	2	Pass1	PepFrag1	None	22710710	LREEGKEYVGQDGDIMEFR	LREEGKEYVGQDGDIMEFR	349	19	4.13	1225	2	2	0	0	3949908	53005		456	2.1	b9y16*y17*y19	244940	2060	195736182746551	904907884977009	0.0106	Yellow	13789	22710761	22710753	316393	1896	1896.00	2.54	3
6	NCDO2118_RS00035	GTP-binding protein 11336:12451 forward MW:41242	Regular	5057384	1.06	412419609	23	9	37	19.14	179025	26284	60532	0	3	Pass1	PepFrag1	None	15636908	VEEEISELEDDEK	VEEEISELEDDEK	247	13	3.33	1224	2	2	0	1	8377609	56270		197	1.8	b4y9	211791	1397	151085889207092	111085889207092	0.0105	Yellow	5987	15636940	15636954	198024	1881	1881.00	2.00	2
6	NCDO2118_RS00035	GTP-binding protein 11336:12451 forward MW:41242	Regular	5057384	1.06	412419609	23	9	37	19.14	179025	26284	60532	0	4	Pass1	PepFrag1	None	15577730	APQMAGIIHTDFEK	APQMAGIIHTDFEK	308	14	5.22	1221	2	2	0	0	7934679	56035	Identified	150	1.7	b7y2y11y13*	232647	1439	154099121719543	114099121719543	0.0079	Yellow	7088	15577664	15577678	210211	1409	1409.00	2.00	2
6	NCDO2118_RS00035	GTP-binding protein 11336:12451 forward MW:41242	Regular	5057384	1.06	412419609	23	9	37	19.14	179025	26284	60532	0	5	Pass1	PepFrag1	None	16778442	EFAATENAEVAVISAR	EFAATENAEVAVISAR	231	16	3.96	1222	1	1	0	0	1491859	48777		32	1.5	y9	263762	1541	161297657411125	121297657411125	0.0052	Red	10393	16778497	16778507	249762	927	927.00	2.00	2
6	NCDO2118_RS00035	GTP-binding protein 11336:12451 forward MW:41242	Regular	5057384	1.06	412419609	23	9	37	19.14	179025	26284	60532	0	6	Pass2	PepFrag2	None	7334355	FLANIR	FLANIR	89	6	11.05	1223	3	3	0	0	638001	45087		47017	4.0	b6y2y5*y6	192837	694	947689235915607	149537847183121	0.7719	Red	1321	7334403	7334420	136569	138187	138187.00	1.00	1
6	NCDO2118_RS00035	GTP-binding protein 11336:12451 forward MW:41242	Regular	5057384	1.06	412419609	23	9	37	19.14	179025	26284	60532	0	7	Pass2	PepFrag2	None	8084464	AWTFKR	AWTFKR	299	6	11.49	1228	2	2	0	0	1507663	48822		1796	2.4	b5y6	142858	741	990007397006136	158001479401227	0.0503	Red	2537	8084158	8084173	159528	9004	9004.00	1.44	1
6	NCDO2118_RS00035	GTP-binding protein 11336:12451 forward MW:41242	Regular	5057384	1.06	412419609	23	9	37	19.14	179025	26284	60532	0	8	Pass2	PepFrag2	None	12125267	TIDFDEDETK	TIDFDEDETK	184	10	3.43	1227	1	1	0	0	345551	42424		284	1.5	y5y10	189419	1071	126556934911502	865569349115019	0.0077	Red	2305	12125359	12125380	156638	1372	1372.00	2.00	2
6	NCDO2118_RS00035	GTP-binding protein 11336:12451 forward MW:41242	Regular	5057384	1.06	412419609	23	9	37	19.14	179025	26284	60532	0	9	Pass2	PepFrag2	None	20018858	EEGKEYVGQDGDIMEFR	EEGKEYVGQDGDIMEFR	351	17	3.82	1226	0	0	0	0	2093736	50248		49	1.5	y8	259898	1788	178103031019338	138103031019338	0.0050	Yellow	10887	20019470	20019464	256975	896	896.00	2.00	2
6	NCDO2118_RS00035	GTP-binding protein 11336:12451 forward MW:41242	Regular	5057384	1.06	412419609	23	9	37	19.14	179025	26284	60532	0	10	Pass2	InSource	None	7914080	GVDMLTR	ESGVDMLTR	272	7	7.00	1220	1	1	0	0	1587507	0.0000		624	0.0	y7	180793	733	982868954262199	15657379085244	0.0053	Green	4881	7914066	7914082	186596	946	946.00	1.00	1
6	NCDO2118_RS00035	GTP-binding protein 11336:12451 forward MW:41242	Regular	4999615	1.7	412419609	23	6	37	12.40	16467	11325	6125	1	1	Pass1	PepFrag1	None	13097838	ALTAGIVGLPNVGK	ALTAGIVGLPNVGK	1	14	10.10	952	10	10	6	3	118870500	67740	Identified	2092	3.0	b3b3b5b6b6y5y7y8y9y10y11y12	260053	1274	142082062516004	102082062516004	0.4050	Green	5575	13097804	13097833	281615	6669	6669.00	2.00	2
6	NCDO2118_RS00035	GTP-binding protein 11336:12451 forward MW:41242	Regular	4999615	1.7	412419609	23	6	37	12.40	16467	11325	6125	0	2	Pass1	PepFrag1	None	9945568	STLFNAITK	STLFNAITK	15	9	10.10	951	3	3	2	0	16650160	59204		245	1.2	y5y6y7	233639	940	116014303376569	760143033765691	0.0535	Green	3369	9945524	9945559	243242	881	881.00	2.00	2
6	NCDO2118_RS00035	GTP-binding protein 11336:12451 forward MW:41242	Regular	4999615	1.7	412419609	23	6	37	12.40	16467	11325	6125	0	3	Pass2	PepFrag2	None	9985881	LKPVLEDGK	LKPVLEDGK	172	9	7.00	953	2	2	0	0	692295	45392	Identified	2772	2.1	b9y7	127417	961	117735805470977	77735805470977	0.2493	Red	2603	9985785	9985820	228964	4106	4106.00	2.00	2
6	NCDO2118_RS00035	GTP-binding protein 11336:12451 forward MW:41242	Regular	4999615	1.7	412419609	23	6	37	12.40	16467	11325	6125	0	4	Pass2	PepFrag2	None	10906143	AEFLEAIGLK	AEFLEAIGLK	260	10	4.26	954	5	5	2	1	3458819	52379		330	1.5	b2b6b7y7y8	319516	1042	124261935390167	842619353901674	0.0860	Yellow	8142	10906021	10906055	310210	1416	1416.00	2.00	2
6	NCDO2118_RS00035	GTP-binding protein 11336:12451 forward MW:41242	Regular	4999615	1.7	412419609	23	6	37	12.40	16467	11325	6125	0	5	Pass2	MissedCleavage	None	18670211	KTVPTTFEFTDIAGIVK	KTVPTTFEFTDIAGIVK	61	17	7.00	955	0	0	0	0	1648437	49160	Missing	229	2.2	b7y12	356832	1775	177238693138861	137238693138861	0.1453	Red	13268	18670411	18670411	360367	2393	2393.00	2.00	2
6	NCDO2118_RS00035	GTP-binding protein 11336:12451 forward MW:41242	Regular	4999615	1.7	412419609	23	6	37	12.40	16467	11325	6125	0	6	Pass2	MissedCleavage	None	15527741	TIDFDEDETKVLK	TIDFDEDETKVLK	184	13	3.86	956	3	3	0	0	2432430	50850		457	1.5	b1b6y1y7y11	240069	1435	153813422202609	113813422202609	0.0608	Yellow	6621	15527727	15527747	293896	1002	1002.00	2.00	2
6	NCDO2118_RS00035	GTP-binding protein 11336:12451 forward MW:41242	Regular	719273	2.13	412419609	5	2	37	2.43	18547	8469	1883	1	1	Pass1	PepFrag1	None	10074826	ESGVDMLTR	ESGVDMLTR	270	9	4.07	488	3	3	1	0	29349000	53245		319	1.9	y4y5y7	177992	915	113948084834664	739480848346641	0.1522	Red	2889	10074805	10074836	186833	2823	2823.00	1.57	2
6	NCDO2118_RS00035	GTP-binding protein 11336:12451 forward MW:41242	Regular	719273	2.13	412419609	5	2	37	2.43	18547	8469	1883	0	2	Pass2	PepFrag2	None	8084464	AWTFKR	AWTFKR	299	6	11.49	489	2	2	0	0	451525	35116		1564	3.0	b5y6	173597	741	990007397006136	590007397006136	0.8478	Red	1405	8084211	8084243	141644	15724	15724.00	1.65	2
6	NCDO2118_RS00035	GTP-binding protein 11336:12451 forward MW:41242	Regular	722353	2.41	412419609	14	4	37	6.20	12817	7153.5	5946	1	1	Pass1	PepFrag1	None	12125267	TIDFDEDETK	TIDFDEDETK	184	10	3.43	312	5	5	2	2	13693030	49952		1168	2.0	b2b3y5y7y8	177771	1071	126556934911502	865569349115019	0.2322	Red	3429	12125296	12125311	177771	2976	2976.00	2.00	2
6	NCDO2118_RS00035	GTP-binding protein 11336:12451 forward MW:41242	Regular	722353	2.41	412419609	14	4	37	6.20	12817	7153.5	5946	0	2	Pass1	PepFrag1	None	15636908	VEEEISELEDDEK	VEEEISELEDDEK	247	13	3.33	313	6	6	2	2	9118267	48187		501	1.8	b2b4y7y8y9y11	201597	1397	151085889207092	111085889207092	0.1399	Red	4017	15636985	15636984	201597	1793	1793.00	2.00	2
6	NCDO2118_RS00035	GTP-binding protein 11336:12451 forward MW:41242	Regular	722353	2.41	412419609	14	4	37	6.20	12817	7153.5	5946	0	3	Pass2	PepFrag2	None	10074826	ESGVDMLTR	ESGVDMLTR	270	9	4.07	315	2	2	0	0	901386	38137		4224	2.5	y3y9	152971	915	113948084834664	187896169669328	0.5273	Red	2364	10074553	10074544	152971	6759	6759.00	1.00	1
6	NCDO2118_RS00035	GTP-binding protein 11336:12451 forward MW:41242	Regular	722353	2.41	412419609	14	4	37	6.20	12817	7153.5	5946	0	4	Pass2	PepFrag2	None	9985881	LKPVLEDGK	LKPVLEDGK	172	9	7.00	314	1	1	0	0	490308	35492	Missing	53	1.4	y8	239397	961	117735805470977	77735805470977	0.1006	Red	4589	9985959	9985979	239397	1289	1289.00	2.00	2
11	NCDO2118_RS00065	peptidyl-tRNA hydrolase 16817:17383 forward MW:20963	Regular	2083030	1.24	209632221	11	4	17	21.28	175749	259791	69898	1	1	Pass1	PepFrag1	None	7114763	AVAPLLK	AVAPLLK	72	7	10.10	2835	8	8	5	1	44294810	59650	Identified	68489	6.0	b2b3b4b5b6b7y3y7	194672	712	964005762446893	152801152489379	0.9774	Green	7017	7114739	7114755	224843	171770	171770.00	1.05	1
11	NCDO2118_RS00065	peptidyl-tRNA hydrolase 16817:17383 forward MW:20963	Regular	2083030	1.24	209632221	11	4	17	21.28	175749	259791	69898	0	2	Pass1	PepFrag1	None	19989338	HGMTVVNHVLSGFDNEDK	HGMTVVNHVLSGFDNEDK	139	18	5.11	2836	0	0	0	0	4530330	49748		215	1.9	b18y8	315659	1814	179825450101811	139825450101811	0.0081	Red	16239	19989476	19989443	320387	1424	1424.00	2.00	2
11	NCDO2118_RS00065	peptidyl-tRNA hydrolase 16817:17383 forward MW:20963	Regular	2083030	1.24	209632221	11	4	17	21.28	175749	259791	69898	0	3	Pass2	MissedCleavage	None	16358411	EIAQDGIFKAVDAMK	EIAQDGIFKAVDAMK	157	15	4.31	2837	2	2	0	1	7640507	52018		1017	1.8	b4b5*b5b8*b9b10*b13*y11y12*	261970	1536	160948565892464	120948565892464	0.0086	Yellow	9046	16358405	16358404	245969	1506	1506.00	2.00	2
11	NCDO2118_RS00065	peptidyl-tRNA hydrolase 16817:17383 forward MW:20963	Regular	2083030	1.24	209632221	11	4	17	21.28	175749	259791	69898	0	4	Pass2	VarMod	Oxidation M(1)	11165718	MIVGLGNPGDK	MIVGLGNPGDK	3	11	6.78	2838	1	1	0	0	1231418	44091	Identified	177	1.4	b7*y7y8	188222	1033	123545381615726	835453816157263	0.0060	Red	3221	11165612	11165638	182799	1049	1049.00	2.00	2
11	NCDO2118_RS00065	peptidyl-tRNA hydrolase 16817:17383 forward MW:20963	Regular	1264593	2.13	209632221	16	5	17	22.87	16501	13195	8735	1	1	Pass1	PepFrag1	None	7114763	AVAPLLK	AVAPLLK	72	7	10.10	2325	6	6	3	2	4707804	47748	Missing	1844	2.4	b4b5b6y2y3y7	190533	712	964005762446893	152801152489379	0.4259	Red	8917	7114749	7114768	246285	7028	7028.00	1.00	1
11	NCDO2118_RS00065	peptidyl-tRNA hydrolase 16817:17383 forward MW:20963	Regular	1264593	2.13	209632221	16	5	17	22.87	16501	13195	8735	0	2	Pass1	PepFrag1	None	20129998	EEKPFMSLVASTFVNGEK	EEKPFMSLVASTFVNGEK	39	18	4.56	2324	3	3	0	0	5059999	48061	Missing	2199	2.8	b13y8y18	306617	1865	183180338952267	82120225968178	0.2709	Yellow	10964	20129920	20129928	272168	4470	4470.00	2.65	3
11	NCDO2118_RS00065	peptidyl-tRNA hydrolase 16817:17383 forward MW:20963	Regular	1264593	2.13	209632221	16	5	17	22.87	16501	13195	8735	0	3	Pass1	PepFrag1	None	19989338	HGMTVVNHVLSGFDNEDK	HGMTVVNHVLSGFDNEDK	139	18	5.11	2323	3	3	0	0	6317156	49025		248	2.0	b4y11y12y13*y15	247494	1814	179825450101811	139825450101811	0.1028	Yellow	12134	19989379	19989353	291231	1697	1697.00	2.00	2
11	NCDO2118_RS00065	peptidyl-tRNA hydrolase 16817:17383 forward MW:20963	Regular	1264593	2.13	209632221	16	5	17	22.87	16501	13195	8735	0	4	Pass2	VarMod	Oxidation M(1)	11165718	MIVGLGNPGDK	MIVGLGNPGDK	3	11	6.78	2326	3	3	0	0	1320679	42227	Identified	3932	1.8	b7b8*b11y6*y8*y10*y11y11*	201523	1033	123545381615726	207090763231453	0.1355	Red	10399	11165749	11165755	264289	2236	2236.00	1.42	1
11	NCDO2118_RS00065	peptidyl-tRNA hydrolase 16817:17383 forward MW:20963	Regular	1264593	2.13	209632221	16	5	17	22.87	16501	13195	8735	0	5	Pass2	VarMod	Oxidation M(12)	17508105	FYLENGDFQKTMNK	FYLENGDFQKTMNK	172	14	6.95	2327	1	1	0	0	1596266	43051		512	1.5	b4b6*y3*y7	248824	1576	163730822296663	691538815311084	0.0648	Red	8728	17508104	17508123	243435	1070	1070.00	3.43	3
18	NCDO2118_RS00100	tRNA(Ile)-lysidine synthetase 24096:25367 forward MW:49545	Regular	985756	3.77	496023910	18	14	48	18.44	45719	12049	5209	1	1	Pass1	PepFrag1	None	11746202	ISELEIVDEK	ISELEIVDEK	226	10	3.69	3194	1	1	0	0	1415201	41446		128	2.3	b8y3	236792	1103	129065442828005	890654428280055	0.1023	Red	7885	11746167	11746194	218895	4679	4679.00	2.00	2
18	NCDO2118_RS00100	tRNA(Ile)-lysidine synthetase 24096:25367 forward MW:49545	Regular	985756	3.77	496023910	18	14	48	18.44	45719	12049	5209	0	2	Pass1	PepFrag1	None	10556095	NQLIPELTK	NQLIPELTK	191	9	7.00	3193	0	0	0	0	1013073	39994	Missing	38	2.0	b6*	217040	1009	121624316229686	816243162296861	0.0809	Red	7075	10556019	10556048	211361	3699	3699.00	2.00	2
18	NCDO2118_RS00100	tRNA(Ile)-lysidine synthetase 24096:25367 forward MW:49545	Regular	985756	3.77	496023910	18	14	48	18.44	45719	12049	5209	0	3	Pass1	PepFrag1	None	19089185	ENPQFSQSISDLSSEIK	ENPQFSQSISDLSSEIK	200	17	3.83	3190	6	6	1	1	6092322	47786	Missing	1382	2.6	b5b7b11b17y2y5y8y9y11y12	263076	1730	174230307433588	134230307433588	0.0803	Red	13106	19089268	19089265	284015	3671	3671.00	2.07	2
18	NCDO2118_RS00100	tRNA(Ile)-lysidine synthetase 24096:25367 forward MW:49545	Regular	985756	3.77	496023910	18	14	48	18.44	45719	12049	5209	0	4	Pass1	PepFrag1	None	8614141	YQFFEK	YQFFEK	101	6	6.89	3192	1	1	0	0	3113195	44870		68	1.7	y4	201346	769	101479237201927	162958474403854	0.0767	Red	5306	8614174	8614193	194259	3507	3507.00	1.00	1
18	NCDO2118_RS00100	tRNA(Ile)-lysidine synthetase 24096:25367 forward MW:49545	Regular	985756	3.77	496023910	18	14	48	18.44	45719	12049	5209	0	5	Pass1	PepFrag1	None	10745830	ENPLIFVDK	ENPLIFVDK	371	9	4.07	3189	1	1	0	0	15514920	51845	Identified	360	1.6	b2b4y7	260268	1009	121624316229686	816243162296861	0.0392	Yellow	12116	10745779	10745808	268017	1792	1792.00	2.00	2
18	NCDO2118_RS00100	tRNA(Ile)-lysidine synthetase 24096:25367 forward MW:49545	Regular	985756	3.77	496023910	18	14	48	18.44	45719	12049	5209	0	6	Pass1	PepFrag1	None	16238013	IVKDEHYFDKDSK	IVKDEHYFDKDSK	10	13	5.33	3191	0	0	0	0	1505842	41715		84	1.7	y11	139375	1483	157224564900599	117224564900599	0.0320	Red	7588	16238002	16238016	216110	1461	1461.00	2.00	2
18	NCDO2118_RS00100	tRNA(Ile)-lysidine synthetase 24096:25367 forward MW:49545	Regular	985756	3.77	496023910	18	14	48	18.44	45719	12049	5209	0	7	Pass1	PepFrag1	None	8594632	SLQGIADR	SLQGIADR	141	8	7.00	3188	1	1	0	0	585393	37612		191	1.3	b4b5	138613	789	103231198547078	632311985470777	0.0270	Red	4125	8594646	8594676	181758	1234	1234.00	2.00	2
18	NCDO2118_RS00100	tRNA(Ile)-lysidine synthetase 24096:25367 forward MW:49545	Regular	985756	3.77	496023910	18	14	48	18.44	45719	12049	5209	0	8	Pass1	PepFrag1	None	8324240	EFYFVK	EFYFVK	290	6	6.89	3195	2	2	0	0	813115	39039		430	1.0	b5y6	227572	760	100685909104663	161371818209326	0.0184	Red	9412	8324263	8324282	234377	843	843.00	1.00	1
18	NCDO2118_RS00100	tRNA(Ile)-lysidine synthetase 24096:25367 forward MW:49545	Regular	985756	3.77	496023910	18	14	48	18.44	45719	12049	5209	0	9	Pass2	PepFrag2	None	20370135	ENPQFSQSISDLSSEIKK	ENPQFSQSISDLSSEIKK	200	18	4.44	3201	2	2	0	0	808570	39015	Missing	143	3.4	b18y13	240953	1865	183180338952267	143180338952267	0.1648	Red	13224	20369888	20369876	285881	7535	7535.00	2.36	2
18	NCDO2118_RS00100	tRNA(Ile)-lysidine synthetase 24096:25367 forward MW:49545	Regular	985756	3.77	496023910	18	14	48	18.44	45719	12049	5209	0	10	Pass2	PepFrag2	None	9584516	FTGEFTEK	FTGEFTEK	87	8	4.26	3198	1	1	0	0	2054199	43064		635	2.3	y7	163190	857	109080431890802	690804318908022	0.1317	Red	4941	9584597	9584627	190326	6023	6023.00	1.92	2
18	NCDO2118_RS00100	tRNA(Ile)-lysidine synthetase 24096:25367 forward MW:49545	Regular	985756	3.77	496023910	18	14	48	18.44	45719	12049	5209	0	11	Pass2	PepFrag2	None	36367625	ENSIEIVSENPQDESFMEVYLPLEGEIEIRK	ENSIEIVSENPQDESFMEVYLPLEGEIEIRK	310	31	3.67	3199	0	0	0	0	1879234	42678	Missing	45	3.8	b11	405919	3353	270841578638703	140561052425802	0.1294	Red	16897	36367222	36367075	419220	5916	5916.00	3.20	3
18	NCDO2118_RS00100	tRNA(Ile)-lysidine synthetase 24096:25367 forward MW:49545	Regular	985756	3.77	496023910	18	14	48	18.44	45719	12049	5209	0	12	Pass2	PepFrag2	None	12936474	IVKDEHYFDK	IVKDEHYFDK	10	10	5.28	3200	0	0	0	0	1344033	41222		122	2.0	b8	152033	1184	135309234100625	953092341006245	0.0701	Red	2588	12936870	12936895	163724	3207	3207.00	2.00	2
18	NCDO2118_RS00100	tRNA(Ile)-lysidine synthetase 24096:25367 forward MW:49545	Regular	985756	3.77	496023910	18	14	48	18.44	45719	12049	5209	0	13	Pass2	VarMod	Phosphoryl STY(7)	19199626	ILWVKPSIGEEINDAR	ILWVKPSIGEEINDAR	404	16	4.44	3197	1	1	0	0	3101524	44853	Missing	865	1.7	y4*y6*y8y16	302529	1730	174230307433588	761535382890588	0.0276	Red	13270	19199597	19199615	286264	1264	1264.00	2.57	3
18	NCDO2118_RS00100	tRNA(Ile)-lysidine synthetase 24096:25367 forward MW:49545	Regular	985756	3.77	496023910	18	14	48	18.44	45719	12049	5209	0	14	Pass2	VarMod	Phosphoryl STY(*)	19888848	ENPQFSQSISDLSSEIK	ENPQFSQSISDLSSEIK	200	17	3.83	3196	2	2	0	0	1925009	42782	Missing	718	1.5	b13-H3PO4y11-H3PO4y14y17	263076	1730	174230307433588	134230307433588	0.0194	Red	12751	19888853	19888845	278193	888	888.00	2.34	2
19	NCDO2118_RS00105	hypoxanthine-guanine phosphoribosyltransferase 25348:25899 forward MW:20648	Regular	26194820	0	207048970	19	3	15	20.22	106368	158418	34258	1	1	Pass1	PepFrag1	None	10866405	LILDVDTAVK	LILDVDTAVK	85	10	3.88	702	17	17	14	7	478113100	80977		33790	7.2	b2b3b4b5b6b7b8b9y1y3y4y5y5y6y6y7y8y9y10	255215	1059	125609824146261	85609824146261	0.9839	Green	10518	10866415	10866441	258309	104654	104654.00	1.74	2
19	NCDO2118_RS00105	hypoxanthine-guanine phosphoribosyltransferase 25348:25899 forward MW:20648	Regular	26194820	0	207048970	19	3	15	20.22	106368	158418	34258	0	2	Pass1	PepFrag1	None	12877042	VLVSEEEIIEK	VLVSEEEIIEK	12	11	3.79	703	2	2	0	0	1138335	54745		216	1.3	y1y5y7y8	280183	1226	138490488654813	984904886548132	0.0090	Yellow	4760	12876953	12876973	200995	958	958.00	2.00	2
19	NCDO2118_RS00105	hypoxanthine-guanine phosphoribosyltransferase 25348:25899 forward MW:20648	Regular	26194820	0	207048970	19	3	15	20.22	106368	158418	34258	0	3	Pass2	VarMod	Phosphoryl STY(11);Phosphoryl STY(14)	19739596	DILIVEDIIDTGRTLK	DILIVEDIIDTGRTLK	97	16	3.97	704	0	0	0	0	2843972	58721		252	1.4	b11b12-H3PO4y3y11-2(H3PO4)y12-H3PO4y14-H3PO4	355649	1748	175436755267207	76957836844805	0.0071	Green	11879	19739634	19739662	273067	756	756.00	2.69	3
19	NCDO2118_RS00105	hypoxanthine-guanine phosphoribosyltransferase 25348:25899 forward MW:20648	Regular	52329800	0	207048970	71	9	15	39.89	315871	229487	124711	1	1	Pass1	PepFrag1	None	9946408	NPLVLGILR	NPLVLGILR	38	9	11.05	1034	13	13	10	4	443129900	83653	Identified	75152	7.7	b2b2*b3b3*b4b4*b5b5*b6b6*b8b9y4y5y6y7y8y9y9*	332066	983	119525888140019	795258881400194	0.4437	Green	23779	9946377	9946400	316433	140137	140137.00	1.83	2
19	NCDO2118_RS00105	hypoxanthine-guanine phosphoribosyltransferase 25348:25899 forward MW:20648	Regular	52329800	0	207048970	71	9	15	39.89	315871	229487	124711	0	2	Pass1	PepFrag1	None	17329632	NLPYVGVLKPEVYNK	NLPYVGVLKPEVYNK	168	15	9.47	1033	12	12	5	2	185499000	79871	Identified	20666	6.6	b3*b5*b6b7b9y2y3y3*y6y6y7y7y9y10y10*y11y13y15	270192	1644	168407272831315	722715152208768	0.1774	Green	12720	17329546	17329573	269377	56037	56037.00	2.60	3
19	NCDO2118_RS00105	hypoxanthine-guanine phosphoribosyltransferase 25348:25899 forward MW:20648	Regular	52329800	0	207048970	71	9	15	39.89	315871	229487	124711	0	3	Pass1	PepFrag1	None	11736878	GSVPFLAELIK	GSVPFLAELIK	47	11	7.00	1035	9	9	6	0	209382500	80397	Identified	12405	4.9	b3b6b9b10y3y4y5y6y7y8y11	347347	1134	131472525008487	914725250084867	0.1055	Green	37294	11736866	11736888	374547	33313	33313.00	1.88	2
19	NCDO2118_RS00105	hypoxanthine-guanine phosphoribosyltransferase 25348:25899 forward MW:20648	Regular	52329800	0	207048970	71	9	15	39.89	315871	229487	124711	0	4	Pass1	PepFrag1	None	12407260	IVTLLDKPEGR	IVTLLDKPEGR	127	11	7.03	1037	4	4	2	1	9197073	66824	Missing	2964	4.9	b2y9y10y11	179758	1191	135842023393502	958420233935024	0.1051	Green	12053	12407186	12407206	267075	33210	33210.00	1.95	2
19	NCDO2118_RS00105	hypoxanthine-guanine phosphoribosyltransferase 25348:25899 forward MW:20648	Regular	52329800	0	207048970	71	9	15	39.89	315871	229487	124711	0	5	Pass1	PepFrag1	None	10866405	LILDVDTAVK	LILDVDTAVK	85	10	3.88	1032	6	6	2	1	23798400	70953		3725	3.2	b2y4y6y8y9y10	272057	1059	125609824146261	85609824146261	0.0373	Green	9631	10866329	10866352	254074	11792	11792.00	1.77	2
19	NCDO2118_RS00105	hypoxanthine-guanine phosphoribosyltransferase 25348:25899 forward MW:20648	Regular	52329800	0	207048970	71	9	15	39.89	315871	229487	124711	0	6	Pass1	PepFrag1	None	17239113	SKELGEILTKEYEGK	SKELGEILTKEYEGK	23	15	4.73	1036	2	2	0	1	10889420	67558		476	1.9	b8y7	275468	1616	166489636518861	709930910125739	0.0054	Green	22070	17239118	17239145	309874	1707	1707.00	3.00	3
19	NCDO2118_RS00105	hypoxanthine-guanine phosphoribosyltransferase 25348:25899 forward MW:20648	Regular	52329800	0	207048970	71	9	15	39.89	315871	229487	124711	0	7	Pass2	MissedCleavage	None	16009057	EYEGKNPLVLGILR	EYEGKNPLVLGILR	33	14	7.03	1038	1	1	0	0	2188811	60590	Identified	221	2.7	b8*y8y11*	268153	1525	160179228163551	667861521090339	0.0164	Green	12465	16009175	16009206	268419	5188	5188.00	3.00	3
19	NCDO2118_RS00105	hypoxanthine-guanine phosphoribosyltransferase 25348:25899 forward MW:20648	Regular	52329800	0	207048970	71	9	15	39.89	315871	229487	124711	0	8	Pass2	VarMod	Phosphoryl STY(7)	13797294	LILDVDTAVKGR	LILDVDTAVKGR	85	12	7.00	1040	6	6	2	0	12680740	68219		667	2.5	b3b10b11y6y7y9-H3PO4y10y11	209386	1255	140665885590256	100665885590256	0.0146	Green	8003	13797270	13797286	243931	4606	4606.00	2.00	2
19	NCDO2118_RS00105	hypoxanthine-guanine phosphoribosyltransferase 25348:25899 forward MW:20648	Regular	52329800	0	207048970	71	9	15	39.89	315871	229487	124711	0	9	Pass2	VarMod	Phosphoryl STY(9)	11976126	SKELGEILTK	SKELGEILTK	23	10	7.08	1039	1	1	0	0	1562125	59125		581	1.4	b5b7b9y6y6-H3PO4	261494	1074	126793158860728	867931588607284	0.0035	Yellow	31984	11976188	11976209	349994	1103	1103.00	2.00	2
19	NCDO2118_RS00105	hypoxanthine-guanine phosphoribosyltransferase 25348:25899 forward MW:20648	Regular	52329800	0	207048970	71	9	15	39.89	315871	229487	124711	0	10	Pass2	InSource	None	9305659	PFLAELIK	GSVPFLAELIK	50	8	7.00	1035	8	8	3	2	39656370	0.0000	Identified	2536	0.0	b3b5b6b6b7y1y2y6y8	347347	908	113366185315295	733661853152945	0.0323	Green	37283	9305601	9305624	374471	10208	10208.00	1.56	2
19	NCDO2118_RS00105	hypoxanthine-guanine phosphoribosyltransferase 25348:25899 forward MW:20648	Regular	52329800	0	207048970	71	9	15	39.89	315871	229487	124711	0	11	Pass2	InSource	None	6704610	VLGILR	NPLVLGILR	41	6	11.05	1034	3	3	0	0	4033065	0.0000		2629	0.0	b3b6y6	332066	673	928473850958121	145694770191624	0.0198	Green	23788	6704600	6704622	316464	6245	6245.00	1.00	1
19	NCDO2118_RS00105	hypoxanthine-guanine phosphoribosyltransferase 25348:25899 forward MW:20648	Regular	52329800	0	207048970	71	9	15	39.89	315871	229487	124711	0	12	Pass2	InSource	None	5713926	LGILR	NPLVLGILR	42	5	11.05	1034	1	1	0	0	521061	0.0000		237	0.0	y1	332066	568	829198532217113	125839706443423	0.0195	Green	23753	5713904	5713924	316369	6155	6155.00	1.00	1
19	NCDO2118_RS00105	hypoxanthine-guanine phosphoribosyltransferase 25348:25899 forward MW:20648	Regular	52329800	0	207048970	71	9	15	39.89	315871	229487	124711	0	13	Pass2	InSource	None	7835451	LVLGILR	NPLVLGILR	40	7	11.05	1034	2	2	0	0	1250312	0.0000		2070	0.0	y1y7	332066	797	103927827389527	167855654779053	0.0112	Green	23773	7835408	7835429	316414	3550	3550.00	1.00	1
19	NCDO2118_RS00105	hypoxanthine-guanine phosphoribosyltransferase 25348:25899 forward MW:20648	Regular	52329800	0	207048970	71	9	15	39.89	315871	229487	124711	0	14	Pass2	InSource	None	8805979	PLVLGILR	NPLVLGILR	39	8	11.05	1034	3	3	1	0	6738918	0.0000	Missing	382	0.0	b2y4y5	332066	887	11161144069031	716114406903103	0.0083	Green	23811	8805914	8805938	316545	2620	2620.00	2.00	2
19	NCDO2118_RS00105	hypoxanthine-guanine phosphoribosyltransferase 25348:25899 forward MW:20648	Regular	16062040	0	207048970	20	4	15	24.59	63605	61913	21748	1	1	Pass1	PepFrag1	None	9946408	NPLVLGILR	NPLVLGILR	38	9	11.05	731	9	9	6	2	206948700	75217	Identified	17508	5.2	b2b2*b3b3*b4*b9y4y5y6y7y8y9	319169	983	119525888140019	795258881400194	0.7634	Green	11540	9946344	9946370	318659	48555	48555.00	1.91	2
19	NCDO2118_RS00105	hypoxanthine-guanine phosphoribosyltransferase 25348:25899 forward MW:20648	Regular	16062040	0	207048970	20	4	15	24.59	63605	61913	21748	0	2	Pass1	PepFrag1	None	17329632	NLPYVGVLKPEVYNK	NLPYVGVLKPEVYNK	168	15	9.47	730	3	3	0	0	25688120	66155	Identified	1661	3.4	y11y13y15	256406	1644	168407272831315	722715152208768	0.1371	Green	6523	17329535	17329558	275084	8721	8721.00	2.71	3
19	NCDO2118_RS00105	hypoxanthine-guanine phosphoribosyltransferase 25348:25899 forward MW:20648	Regular	16062040	0	207048970	20	4	15	24.59	63605	61913	21748	0	3	Pass1	PepFrag1	None	11736878	GSVPFLAELIK	GSVPFLAELIK	47	11	7.00	732	6	6	4	0	57319430	69641	Identified	2034	2.4	y4y5y6y7y8y11	350160	1134	131472525008487	914725250084867	0.0729	Green	19124	11736861	11736885	378714	4637	4637.00	1.89	2
19	NCDO2118_RS00105	hypoxanthine-guanine phosphoribosyltransferase 25348:25899 forward MW:20648	Regular	16062040	0	207048970	20	4	15	24.59	63605	61913	21748	0	4	Pass1	PepFrag1	None	10866405	LILDVDTAVK	LILDVDTAVK	85	10	3.88	729	2	2	0	0	6098029	59910		545	1.6	b8y3y5	256456	1059	125609824146261	85609824146261	0.0266	Green	6392	10866451	10866476	273550	1692	1692.00	2.00	2
19	NCDO2118_RS00105	hypoxanthine-guanine phosphoribosyltransferase 25348:25899 forward MW:20648	Regular	1508378	0	207048970	11	1	15	5.46	20676	57036	6376	1	1	Pass1	PepFrag1	None	10866405	LILDVDTAVK	LILDVDTAVK	85	10	3.88	312	9	9	7	1	27603310	56195		5739	3.9	b2y3y4y5y6y7y8y8y9y10	258811	1059	125609824146261	85609824146261	0.9195	Yellow	3965	10866326	10866352	258811	19012	19012.00	1.89	2
19	NCDO2118_RS00105	hypoxanthine-guanine phosphoribosyltransferase 25348:25899 forward MW:20648	Regular	1508378	0	207048970	11	1	15	5.46	20676	57036	6376	0	2	Pass2	InSource	None	8604724	LDVDTAVK	LILDVDTAVK	87	8	3.88	312	2	2	0	0	1864310	0.0000		637	0.0	b6y8	258753	811	105141347095775	170282694191551	0.0805	Yellow	3961	8604720	8604729	258753	1664	1664.00	1.00	1
19	NCDO2118_RS00105	hypoxanthine-guanine phosphoribosyltransferase 25348:25899 forward MW:20648	Regular	12508080	0	207048970	26	5	15	24.59	56236	51313	21417	1	1	Pass1	PepFrag1	None	9946408	NPLVLGILR	NPLVLGILR	38	9	11.05	624	10	10	8	4	182515500	73585	Identified	16440	4.8	b2b3b3*b4b4*b5y4y5y6y7y8y9	334506	983	119525888140019	795258881400194	0.6643	Green	9165	9946331	9946366	318913	37358	37358.00	1.91	2
19	NCDO2118_RS00105	hypoxanthine-guanine phosphoribosyltransferase 25348:25899 forward MW:20648	Regular	12508080	0	207048970	26	5	15	24.59	56236	51313	21417	0	2	Pass1	PepFrag1	None	17329632	NLPYVGVLKPEVYNK	NLPYVGVLKPEVYNK	168	15	9.47	623	4	4	0	0	29337190	65646	Identified	1759	3.5	b8*y2y5y13y15	257563	1644	168407272831315	722715152208768	0.1738	Green	5169	17329563	17329603	275825	9772	9772.00	2.78	3
19	NCDO2118_RS00105	hypoxanthine-guanine phosphoribosyltransferase 25348:25899 forward MW:20648	Regular	12508080	0	207048970	26	5	15	24.59	56236	51313	21417	0	3	Pass1	PepFrag1	None	11736878	GSVPFLAELIK	GSVPFLAELIK	47	11	7.00	625	5	5	3	0	18145270	63560	Identified	1829	2.3	y5y6y7y8y11	344729	1134	131472525008487	914725250084867	0.0744	Green	14959	11736892	11736925	379356	4183	4183.00	1.85	2
19	NCDO2118_RS00105	hypoxanthine-guanine phosphoribosyltransferase 25348:25899 forward MW:20648	Regular	12508080	0	207048970	26	5	15	24.59	56236	51313	21417	0	4	Pass1	PepFrag1	None	10866405	LILDVDTAVK	LILDVDTAVK	85	10	3.88	626	2	2	0	0	668293	49222		115	1.6	y1y6	261452	1059	125609824146261	85609824146261	0.0325	Red	9810	10866340	10866374	326468	1826	1826.00	2.00	2
19	NCDO2118_RS00105	hypoxanthine-guanine phosphoribosyltransferase 25348:25899 forward MW:20648	Regular	12508080	0	207048970	26	5	15	24.59	56236	51313	21417	0	5	Pass2	MissedCleavage	None	16009057	EYEGKNPLVLGILR	EYEGKNPLVLGILR	33	14	7.03	627	1	1	0	0	277360	45402	Missing	40	1.4	b7	287303	1525	160179228163551	667861521090339	0.0158	Red	11967	16008893	16008938	348430	887	887.00	3.00	3
19	NCDO2118_RS00105	hypoxanthine-guanine phosphoribosyltransferase 25348:25899 forward MW:20648	Regular	12508080	0	207048970	26	5	15	24.59	56236	51313	21417	0	6	Pass2	InSource	None	5713926	LGILR	NPLVLGILR	42	5	11.05	624	2	2	0	0	1345226	0.0000		676	0.0	y1y5	334506	568	829198532217113	125839706443423	0.0205	Green	9159	5713905	5713927	318861	1154	1154.00	1.00	1
19	NCDO2118_RS00105	hypoxanthine-guanine phosphoribosyltransferase 25348:25899 forward MW:20648	Regular	12508080	0	207048970	26	5	15	24.59	56236	51313	21417	0	7	Pass2	InSource	None	6704610	VLGILR	NPLVLGILR	41	6	11.05	624	2	2	0	0	414771	0.0000		558	0.0	y2y6	334506	673	928473850958121	145694770191624	0.0188	Green	9158	6704557	6704579	318859	1056	1056.00	1.00	1
19	NCDO2118_RS00105	hypoxanthine-guanine phosphoribosyltransferase 25348:25899 forward MW:20648	Regular	8361808	0	207048970	14	2	15	5.46	47365	136668	21154	1	1	Pass1	PepFrag1	None	10866405	LILDVDTAVK	LILDVDTAVK	85	10	3.88	2099	11	11	7	2	153021100	71071		20636	5.3	b2b4b9y3y4y5y6y7y7y8y9y10	252919	1059	125609824146261	85609824146261	0.9618	Green	10571	10866402	10866428	257832	45556	45556.00	1.81	2
19	NCDO2118_RS00105	hypoxanthine-guanine phosphoribosyltransferase 25348:25899 forward MW:20648	Regular	8361808	0	207048970	14	2	15	5.46	47365	136668	21154	0	2	Pass2	VarMod	Phosphoryl STY(2)	16808720	EYEGKNPLVLGILR	EYEGKNPLVLGILR	33	14	7.03	2100	2	2	0	0	1249048	50189	Identified	303	1.4	b6b10b11b13y9	277840	1525	160179228163551	120179228163551	0.0171	Red	18887	16808593	16808601	349678	808	808.00	2.00	2
19	NCDO2118_RS00105	hypoxanthine-guanine phosphoribosyltransferase 25348:25899 forward MW:20648	Regular	8361808	0	207048970	14	2	15	5.46	47365	136668	21154	0	3	Pass2	InSource	None	9735564	ILDVDTAVK	LILDVDTAVK	86	9	3.88	2099	1	1	0	0	2452114	0.0000		215	0.0	y9	252919	935	115602539558	191205079115999	0.0211	Green	10590	9735547	9735560	258115	1001	1001.00	1.38	1
19	NCDO2118_RS00105	hypoxanthine-guanine phosphoribosyltransferase 25348:25899 forward MW:20648	Regular	47197550	0	207048970	39	6	15	38.80	259670	243712	94062	1	1	Pass1	PepFrag1	None	17329632	NLPYVGVLKPEVYNK	NLPYVGVLKPEVYNK	168	15	9.47	1282	12	12	5	3	344389000	82110	Identified	36928	8.3	b2b3*b9b12b12*b13y2y6y6*y8*y9y10y10y11y12y13y13y15	267832	1644	168407272831315	722715152208768	0.3969	Green	14389	17329617	17329654	265725	103053	103053.00	2.60	3
19	NCDO2118_RS00105	hypoxanthine-guanine phosphoribosyltransferase 25348:25899 forward MW:20648	Regular	47197550	0	207048970	39	6	15	38.80	259670	243712	94062	0	2	Pass1	PepFrag1	None	9946408	NPLVLGILR	NPLVLGILR	38	9	11.05	1283	9	9	7	3	136034500	78076	Identified	36825	6.7	b2b2*b3b3*b4b4*b5b5*y5y6y7y8y9	316569	983	119525888140019	795258881400194	0.3738	Green	25880	9946362	9946392	310206	97061	97061.00	1.90	2
19	NCDO2118_RS00105	hypoxanthine-guanine phosphoribosyltransferase 25348:25899 forward MW:20648	Regular	47197550	0	207048970	39	6	15	38.80	259670	243712	94062	0	3	Pass1	PepFrag1	None	11736878	GSVPFLAELIK	GSVPFLAELIK	47	11	7.00	1284	6	6	3	0	165463000	78926	Identified	17469	5.4	b3b9y6y7y8y9y11	342981	1134	131472525008487	914725250084867	0.1679	Green	40167	11736885	11736914	371143	43598	43598.00	1.86	2
19	NCDO2118_RS00105	hypoxanthine-guanine phosphoribosyltransferase 25348:25899 forward MW:20648	Regular	47197550	0	207048970	39	6	15	38.80	259670	243712	94062	0	4	Pass1	PepFrag1	None	10866405	LILDVDTAVK	LILDVDTAVK	85	10	3.88	1281	4	4	3	0	37613650	72493		1140	2.6	y7y8y9y10	260099	1059	125609824146261	85609824146261	0.0237	Green	11031	10866367	10866396	251918	6162	6162.00	1.82	2
19	NCDO2118_RS00105	hypoxanthine-guanine phosphoribosyltransferase 25348:25899 forward MW:20648	Regular	47197550	0	207048970	39	6	15	38.80	259670	243712	94062	0	5	Pass1	PepFrag1	None	11176463	SKELGEILTK	SKELGEILTK	23	10	7.08	1285	1	1	0	0	5077745	63796		41	1.7	b7	259853	1074	126793158860728	867931588607284	0.0076	Green	21979	11176435	11176465	295183	1983	1983.00	2.00	2
19	NCDO2118_RS00105	hypoxanthine-guanine phosphoribosyltransferase 25348:25899 forward MW:20648	Regular	47197550	0	207048970	39	6	15	38.80	259670	243712	94062	0	6	Pass2	MissedCleavage	None	18140270	DILIVEDIIDTGRTLK	DILIVEDIIDTGRTLK	97	16	3.97	1286	2	2	0	0	3454189	62123		245	1.9	b9y9	358678	1748	175436755267207	135436755267207	0.0066	Green	38764	18140166	18140171	364231	1710	1710.00	2.00	2
19	NCDO2118_RS00105	hypoxanthine-guanine phosphoribosyltransferase 25348:25899 forward MW:20648	Regular	47197550	0	207048970	39	6	15	38.80	259670	243712	94062	0	7	Pass2	InSource	None	5713926	LGILR	NPLVLGILR	42	5	11.05	1283	4	4	1	1	18763470	0.0000		1287	0.0	b4y1y4y5	316569	568	829198532217113	125839706443423	0.0137	Green	25863	5713888	5713910	310134	3549	3549.00	1.00	1
19	NCDO2118_RS00105	hypoxanthine-guanine phosphoribosyltransferase 25348:25899 forward MW:20648	Regular	47197550	0	207048970	39	6	15	38.80	259670	243712	94062	0	8	Pass2	InSource	None	7835451	LVLGILR	NPLVLGILR	40	7	11.05	1283	1	1	0	0	178959	0.0000		40	0.0	b2	316569	797	103927827389527	167855654779053	0.0068	Green	25893	7835386	7835409	310272	1765	1765.00	1.00	1
19	NCDO2118_RS00105	hypoxanthine-guanine phosphoribosyltransferase 25348:25899 forward MW:20648	Regular	47197550	0	207048970	39	6	15	38.80	259670	243712	94062	0	9	Pass2	NeutralLoss_NH3	None	9776142	NPLVLGILR	NPLVLGILR	38	9	11.05	1283	0	0	0	0	1113895	0.0000	Missing	87	0.0	b8*	316569	983	119525888140019	795258881400194	0.0030	Green	25876	9776068	9776098	310183	789	789.00	2.00	2
19	NCDO2118_RS00105	hypoxanthine-guanine phosphoribosyltransferase 25348:25899 forward MW:20648	Regular	4835748	0	207048970	13	2	15	6.56	60671	177849	29584	1	1	Pass1	PepFrag1	None	10866405	LILDVDTAVK	LILDVDTAVK	85	10	3.88	1872	11	11	6	3	88494190	66314		29510	5.8	b2b3b4b7b8b9y4y6y7y8y8y9y10	258384	1059	125609824146261	85609824146261	0.9771	Green	9061	10866445	10866473	257906	59283	59283.00	1.78	2
19	NCDO2118_RS00105	hypoxanthine-guanine phosphoribosyltransferase 25348:25899 forward MW:20648	Regular	4835748	0	207048970	13	2	15	6.56	60671	177849	29584	0	2	Pass2	MissedCleavage	None	12997631	LILDVDTAVKGR	LILDVDTAVKGR	85	12	7.00	1873	2	2	0	0	4010786	52877		74	1.6	b11y9	213928	1255	140665885590256	100665885590256	0.0229	Yellow	4043	12997603	12997625	203526	1388	1388.00	2.35	2
19	NCDO2118_RS00105	hypoxanthine-guanine phosphoribosyltransferase 25348:25899 forward MW:20648	Regular	44671230	0	207048970	44	4	15	27.32	245145	212803	92065	1	1	Pass1	PepFrag1	None	9946408	NPLVLGILR	NPLVLGILR	38	9	11.05	1175	7	7	5	3	193334500	79363	Missing	42931	6.8	b2b2*b3b3*b4b4*y4y5y6y7	320381	983	119525888140019	795258881400194	0.4039	Green	22619	9946320	9946356	315782	99010	99010.00	2.00	2
19	NCDO2118_RS00105	hypoxanthine-guanine phosphoribosyltransferase 25348:25899 forward MW:20648	Regular	44671230	0	207048970	44	4	15	27.32	245145	212803	92065	0	2	Pass1	PepFrag1	None	17329632	NLPYVGVLKPEVYNK	NLPYVGVLKPEVYNK	168	15	9.47	1174	11	11	4	2	234956900	80210	Identified	24631	7.2	b2b4*b5b11y2y3*y4y6y7y7y9*y10y11y11*y12y13y15	258005	1644	168407272831315	722715152208768	0.2902	Green	11806	17329615	17329652	268052	71136	71136.00	2.57	3
19	NCDO2118_RS00105	hypoxanthine-guanine phosphoribosyltransferase 25348:25899 forward MW:20648	Regular	44671230	0	207048970	44	4	15	27.32	245145	212803	92065	0	3	Pass1	PepFrag1	None	11736878	GSVPFLAELIK	GSVPFLAELIK	47	11	7.00	1176	11	11	5	3	259189700	80636	Identified	16749	5.4	b2b3b3b7b8b9b11y3y5y6y7y8y9y11	342115	1134	131472525008487	914725250084867	0.1740	Green	34812	11736855	11736889	373568	42657	42657.00	1.89	2
19	NCDO2118_RS00105	hypoxanthine-guanine phosphoribosyltransferase 25348:25899 forward MW:20648	Regular	44671230	0	207048970	44	4	15	27.32	245145	212803	92065	0	4	Pass1	PepFrag1	None	17239113	SKELGEILTKEYEGK	SKELGEILTKEYEGK	23	15	4.73	1177	2	2	0	0	3958853	62476		221	3.2	b2b2b15y8	271980	1616	166489636518861	709930910125739	0.0298	Green	9256	17239065	17239102	254563	7304	7304.00	3.00	3
19	NCDO2118_RS00105	hypoxanthine-guanine phosphoribosyltransferase 25348:25899 forward MW:20648	Regular	44671230	0	207048970	44	4	15	27.32	245145	212803	92065	0	5	Pass2	InSource	None	9305659	PFLAELIK	GSVPFLAELIK	50	8	7.00	1176	9	9	5	3	121227500	0.0000	Identified	4102	0.0	b2b3b5b6y2y5y6y7y8	342115	908	113366185315295	733661853152945	0.0536	Green	34803	9305628	9305664	373521	13135	13135.00	1.55	2
19	NCDO2118_RS00105	hypoxanthine-guanine phosphoribosyltransferase 25348:25899 forward MW:20648	Regular	44671230	0	207048970	44	4	15	27.32	245145	212803	92065	0	6	Pass2	InSource	None	6704610	VLGILR	NPLVLGILR	41	6	11.05	1175	2	2	1	0	2753157	0.0000		142	0.0	b3b4	320381	673	928473850958121	145694770191624	0.0200	Green	22599	6704600	6704626	315713	4904	4904.00	1.00	1
19	NCDO2118_RS00105	hypoxanthine-guanine phosphoribosyltransferase 25348:25899 forward MW:20648	Regular	44671230	0	207048970	44	4	15	27.32	245145	212803	92065	0	7	Pass2	InSource	None	5713926	LGILR	NPLVLGILR	42	5	11.05	1175	1	1	0	0	1582472	0.0000		1883	0.0	y5	320381	568	829198532217113	125839706443423	0.0173	Green	22650	5713928	5713952	315857	4245	4245.00	1.00	1
19	NCDO2118_RS00105	hypoxanthine-guanine phosphoribosyltransferase 25348:25899 forward MW:20648	Regular	44671230	0	207048970	44	4	15	27.32	245145	212803	92065	0	8	Pass2	InSource	None	7835451	LVLGILR	NPLVLGILR	40	7	11.05	1175	1	1	0	0	1024992	0.0000		1406	0.0	y7	320381	797	103927827389527	167855654779053	0.0112	Green	22635	7835468	7835494	315819	2754	2754.00	1.00	1
19	NCDO2118_RS00105	hypoxanthine-guanine phosphoribosyltransferase 25348:25899 forward MW:20648	Regular	27463250	0	207048970	49	8	15	43.17	211329	162183	90509	1	1	Pass1	PepFrag1	None	9946408	NPLVLGILR	NPLVLGILR	38	9	11.05	1354	11	11	8	4	265617300	78630	Identified	64375	7.4	b2b2*b3b3*b4b4*b5b9y4y5y6y7y8y9y9*	336515	983	119525888140019	795258881400194	0.5904	Green	18176	9946349	9946377	318409	124776	124776.00	1.84	2
19	NCDO2118_RS00105	hypoxanthine-guanine phosphoribosyltransferase 25348:25899 forward MW:20648	Regular	27463250	0	207048970	49	8	15	43.17	211329	162183	90509	0	2	Pass1	PepFrag1	None	17329632	NLPYVGVLKPEVYNK	NLPYVGVLKPEVYNK	168	15	9.47	1352	9	9	3	0	93115410	74078	Identified	13194	4.7	b3y2y6y7y8y9y10y11y13y15	270811	1644	168407272831315	722715152208768	0.1024	Green	9098	17329568	17329606	270784	21633	21633.00	2.55	3
19	NCDO2118_RS00105	hypoxanthine-guanine phosphoribosyltransferase 25348:25899 forward MW:20648	Regular	27463250	0	207048970	49	8	15	43.17	211329	162183	90509	0	3	Pass1	PepFrag1	None	11736878	GSVPFLAELIK	GSVPFLAELIK	47	11	7.00	1356	4	4	1	0	96323510	74225	Identified	4029	3.7	b3y5y6y8y11	343716	1134	131472525008487	914725250084867	0.0746	Green	29362	11736854	11736880	375876	15774	15774.00	1.84	2
19	NCDO2118_RS00105	hypoxanthine-guanine phosphoribosyltransferase 25348:25899 forward MW:20648	Regular	27463250	0	207048970	49	8	15	43.17	211329	162183	90509	0	4	Pass1	PepFrag1	None	17239113	SKELGEILTKEYEGK	SKELGEILTKEYEGK	23	15	4.73	1353	2	2	0	0	3963469	60368		419	1.9	b8b9y13y13	277419	1616	166489636518861	709930910125739	0.0089	Green	17417	17239057	17239095	315311	1887	1887.00	2.77	3
19	NCDO2118_RS00105	hypoxanthine-guanine phosphoribosyltransferase 25348:25899 forward MW:20648	Regular	27463250	0	207048970	49	8	15	43.17	211329	162183	90509	0	5	Pass1	PepFrag1	None	14718003	DILIVEDIIDTGR	DILIVEDIIDTGR	97	13	3.50	1355	2	2	0	0	2472927	58320		239	1.8	b12y11	361701	1396	151013780440696	111013780440696	0.0080	Green	18693	14717881	14717899	320655	1700	1700.00	2.00	2
19	NCDO2118_RS00105	hypoxanthine-guanine phosphoribosyltransferase 25348:25899 forward MW:20648	Regular	27463250	0	207048970	49	8	15	43.17	211329	162183	90509	0	6	Pass1	PepFrag1	None	10866405	LILDVDTAVK	LILDVDTAVK	85	10	3.88	1357	1	1	0	0	8732947	63799		196	1.6	y9	264606	1059	125609824146261	85609824146261	0.0077	Green	9525	10866348	10866375	273792	1636	1636.00	2.00	2
19	NCDO2118_RS00105	hypoxanthine-guanine phosphoribosyltransferase 25348:25899 forward MW:20648	Regular	27463250	0	207048970	49	8	15	43.17	211329	162183	90509	0	7	Pass2	MissedCleavage	None	16739320	SSGEVKLILDVDTAVK	SSGEVKLILDVDTAVK	79	16	4.31	1359	4	4	1	1	17768610	66884		1093	4.8	b8y4y7y7y8	307591	1602	165526668926466	703511126176443	0.1018	Green	4537	16739264	16739304	234317	21517	21517.00	3.20	3
19	NCDO2118_RS00105	hypoxanthine-guanine phosphoribosyltransferase 25348:25899 forward MW:20648	Regular	27463250	0	207048970	49	8	15	43.17	211329	162183	90509	0	8	Pass2	MissedCleavage	Carbamidomethyl C(4)	30223670	HIDCHLETDFMTVSSYHGGTKSSGEVK	HIDCHLETDFMTVSSYHGGTKSSGEVK	58	27	5.75	1358	1	1	0	0	582445	52040		141	3.5	y1y7	267884	2683	233439000989883	115626000659922	0.0247	Red	7211	30223987	30223917	258107	5229	5229.00	3.00	3
19	NCDO2118_RS00105	hypoxanthine-guanine phosphoribosyltransferase 25348:25899 forward MW:20648	Regular	27463250	0	207048970	49	8	15	43.17	211329	162183	90509	0	9	Pass2	InSource	None	6704610	VLGILR	NPLVLGILR	41	6	11.05	1354	3	3	0	0	2321588	0.0000		2412	0.0	b3b6y6	336515	673	928473850958121	145694770191624	0.0260	Green	18152	6704621	6704640	318339	5489	5489.00	1.00	1
19	NCDO2118_RS00105	hypoxanthine-guanine phosphoribosyltransferase 25348:25899 forward MW:20648	Regular	27463250	0	207048970	49	8	15	43.17	211329	162183	90509	0	10	Pass2	InSource	None	9305659	PFLAELIK	GSVPFLAELIK	50	8	7.00	1356	9	9	6	3	122729300	0.0000	Missing	1095	0.0	b2b3b4b5b6b6y2y5y6y7	343716	908	113366185315295	733661853152945	0.0215	Green	29373	9305633	9305662	375934	4543	4543.00	1.53	2
19	NCDO2118_RS00105	hypoxanthine-guanine phosphoribosyltransferase 25348:25899 forward MW:20648	Regular	27463250	0	207048970	49	8	15	43.17	211329	162183	90509	0	11	Pass2	InSource	None	5713926	LGILR	NPLVLGILR	42	5	11.05	1354	1	1	0	0	1492943	0.0000		1671	0.0	y5	336515	568	829198532217113	125839706443423	0.0211	Green	18154	5713914	5713933	318343	4461	4461.00	1.00	1
19	NCDO2118_RS00105	hypoxanthine-guanine phosphoribosyltransferase 25348:25899 forward MW:20648	Regular	27463250	0	207048970	49	8	15	43.17	211329	162183	90509	0	12	Pass2	InSource	None	7835451	LVLGILR	NPLVLGILR	40	7	11.05	1354	2	2	0	0	3256468	0.0000		1645	0.0	b4y7	336515	797	103927827389527	167855654779053	0.0127	Green	18162	7835400	7835420	318361	2684	2684.00	1.00	1
19	NCDO2118_RS00105	hypoxanthine-guanine phosphoribosyltransferase 25348:25899 forward MW:20648	Regular	5255242	0.46	207048970	15	2	15	13.66	36126	72081	12461	1	1	Pass1	PepFrag1	None	10866405	LILDVDTAVK	LILDVDTAVK	85	10	3.88	1402	8	8	4	1	88341870	66668		11068	4.2	b2b8y2y4y5y7y8y9y10	257136	1059	125609824146261	85609824146261	0.6651	Green	7509	10866371	10866395	258570	24027	24027.00	1.85	2
19	NCDO2118_RS00105	hypoxanthine-guanine phosphoribosyltransferase 25348:25899 forward MW:20648	Regular	5255242	0.46	207048970	15	2	15	13.66	36126	72081	12461	0	2	Pass2	PepFrag2	None	17329632	NLPYVGVLKPEVYNK	NLPYVGVLKPEVYNK	168	15	9.47	1403	2	2	0	0	5219377	54382	Identified	412	3.5	y13y15	270188	1644	168407272831315	128407272831315	0.2609	Yellow	11826	17329327	17329323	319918	9427	9427.00	2.00	2
19	NCDO2118_RS00105	hypoxanthine-guanine phosphoribosyltransferase 25348:25899 forward MW:20648	Regular	5255242	0.46	207048970	15	2	15	13.66	36126	72081	12461	0	3	Pass2	InSource	None	8604724	LDVDTAVK	LILDVDTAVK	87	8	3.88	1402	5	5	1	0	4326251	0.0000		981	0.0	b5b6b6b8y4y8	257136	811	105141347095775	170282694191551	0.0740	Green	7499	8604751	8604766	258470	2672	2672.00	1.00	1
19	NCDO2118_RS00105	hypoxanthine-guanine phosphoribosyltransferase 25348:25899 forward MW:20648	Regular	4669561	0.91	207048970	14	1	15	5.46	22531	60915	8513	1	1	Pass1	PepFrag1	None	10866405	LILDVDTAVK	LILDVDTAVK	85	10	3.88	465	9	9	3	2	85452970	66010		7534	4.0	b2b6y1y3y4y6y7y8y10	263169	1059	125609824146261	85609824146261	0.9012	Green	4775	10866361	10866389	258601	20305	20305.00	1.91	2
19	NCDO2118_RS00105	hypoxanthine-guanine phosphoribosyltransferase 25348:25899 forward MW:20648	Regular	4669561	0.91	207048970	14	1	15	5.46	22531	60915	8513	0	2	Pass2	InSource	None	8604724	LDVDTAVK	LILDVDTAVK	87	8	3.88	465	5	5	1	0	8026760	0.0000		979	0.0	b6b7y4y6y8	263169	811	105141347095775	170282694191551	0.0988	Green	4773	8604742	8604753	258534	2226	2226.00	1.00	1
19	NCDO2118_RS00105	hypoxanthine-guanine phosphoribosyltransferase 25348:25899 forward MW:20648	Regular	6032391	1.01	207048970	10	2	15	13.11	62056	93084	1202	1	1	Pass1	PepFrag1	None	12877042	VLVSEEEIIEK	VLVSEEEIIEK	12	11	3.79	411	2	2	0	1	3759387	53556		377	6.1	b2b5y6y9	266581	1226	138490488654813	984904886548132	0.9674	Yellow	5501	12877001	12877015	256450	60033	60033.00	2.00	2
19	NCDO2118_RS00105	hypoxanthine-guanine phosphoribosyltransferase 25348:25899 forward MW:20648	Regular	6032391	1.01	207048970	10	2	15	13.11	62056	93084	1202	0	2	Pass1	PepFrag1	None	14718003	DILIVEDIIDTGR	DILIVEDIIDTGR	97	13	3.50	410	8	8	5	2	81736480	66929		825	1.9	b3b4y5y6y8y9y10y11	360637	1396	151013780440696	111013780440696	0.0326	Green	8667	14718008	14718012	378427	2023	2023.00	2.00	2
19	NCDO2118_RS00105	hypoxanthine-guanine phosphoribosyltransferase 25348:25899 forward MW:20648	Regular	2025864	1.23	207048970	10	2	15	13.11	54911	82366.5	2985	1	1	Pass1	PepFrag1	None	12877042	VLVSEEEIIEK	VLVSEEEIIEK	12	11	3.79	285	3	3	1	0	2406189	46879		1570	5.7	b2b5b5b6y6y10	256288	1226	138490488654813	984904886548132	0.9201	Yellow	4496	12876980	12877008	256288	50526	50526.00	2.00	2
19	NCDO2118_RS00105	hypoxanthine-guanine phosphoribosyltransferase 25348:25899 forward MW:20648	Regular	2025864	1.23	207048970	10	2	15	13.11	54911	82366.5	2985	0	2	Pass1	PepFrag1	None	14718003	DILIVEDIIDTGR	DILIVEDIIDTGR	97	13	3.50	284	7	7	5	3	26481920	57296		1415	2.5	b2b3b4y8y9y10y11	378247	1396	151013780440696	111013780440696	0.0799	Green	6878	14717982	14717999	378247	4385	4385.00	2.00	2
19	NCDO2118_RS00105	hypoxanthine-guanine phosphoribosyltransferase 25348:25899 forward MW:20648	Regular	2431748	1.59	207048970	8	2	15	13.11	5324	6204	1142	1	1	Pass1	PepFrag1	None	14718003	DILIVEDIIDTGR	DILIVEDIIDTGR	97	13	3.50	2535	6	6	4	2	29909830	58617		849	1.9	b2b3b4y8y9y9y10	341621	1396	151013780440696	111013780440696	0.3884	Green	19130	14717967	14717972	378892	2068	2068.00	2.00	2
19	NCDO2118_RS00105	hypoxanthine-guanine phosphoribosyltransferase 25348:25899 forward MW:20648	Regular	2431748	1.59	207048970	8	2	15	13.11	5324	6204	1142	0	2	Pass2	PepFrag2	None	12877042	VLVSEEEIIEK	VLVSEEEIIEK	12	11	3.79	2536	2	2	0	0	5107466	50941		293	2.1	b11y8y10	261192	1226	138490488654813	984904886548132	0.6116	Yellow	6976	12876870	12876884	201604	3256	3256.00	2.00	2
20	NCDO2118_RS00110	ATP-dependent zinc metalloprotease FtsH 26105:28192 forward MW:75561	Regular	2754886	0	755608538	24	8	58	8.49	73781	39523	25542	1	1	Pass1	PepFrag1	None	15948475	NFQAYIIPTDSVVK	NFQAYIIPTDSVVK	99	14	6.78	599	2	2	0	0	9424802	54144	Identified	212	4.5	b14y7	326677	1493	157930559037942	117930559037942	0.2735	Red	8105	15948493	15948490	411452	20179	20179.00	2.00	2
20	NCDO2118_RS00110	ATP-dependent zinc metalloprotease FtsH 26105:28192 forward MW:75561	Regular	2754886	0	755608538	24	8	58	8.49	73781	39523	25542	0	2	Pass1	PepFrag1	None	14486322	EINAADIDEGMDR	EINAADIDEGMDR	420	13	3.43	596	11	11	7	3	127211500	65446		5229	4.2	b3b3b4b4*b5b5*b6*b6b7*b13y4y6y7y8y9y9y10y11	201773	1289	143195129239694	103195129239694	0.2472	Yellow	4897	14486270	14486276	202007	18241	18241.00	2.00	2
20	NCDO2118_RS00110	ATP-dependent zinc metalloprotease FtsH 26105:28192 forward MW:75561	Regular	2754886	0	755608538	24	8	58	8.49	73781	39523	25542	0	3	Pass1	PepFrag1	None	35457226	IGGYMLALPDEEIMQPTNFHLQDQLASLMGGR	IGGYMLALPDEEIMQPTNFHLQDQLASLMGGR	483	32	4.06	597	2	2	0	0	1518300	46215	Missing	311	2.1	b11y10y11*y13*	470650	3292	267546650671313	138364433780876	0.0149	Red	7622	35457562	35457376	384507	1103	1103.00	3.00	3
20	NCDO2118_RS00110	ATP-dependent zinc metalloprotease FtsH 26105:28192 forward MW:75561	Regular	2754886	0	755608538	24	8	58	8.49	73781	39523	25542	0	4	Pass2	PepFrag2	None	9194778	IQSMRER	IQSMRER	443	7	10.89	602	2	2	0	0	1710147	46731		10417	3.3	b7b7y5y7	62703	840	1076330940749	1752661881498	0.2482	Red	3609	9194397	9194406	160786	18313	18313.00	1.00	1
20	NCDO2118_RS00110	ATP-dependent zinc metalloprotease FtsH 26105:28192 forward MW:75561	Regular	2754886	0	755608538	24	8	58	8.49	73781	39523	25542	0	5	Pass2	PepFrag2	None	11325013	SMVTEYGMSK	SMVTEYGMSK	541	10	6.89	603	4	4	0	0	688318	42779		5446	2.9	b1b7b10y1y8y10	196316	1025	12290669611554	829066961155399	0.1150	Red	2633	11324711	11324730	137234	8487	8487.00	1.93	2
20	NCDO2118_RS00110	ATP-dependent zinc metalloprotease FtsH 26105:28192 forward MW:75561	Regular	2754886	0	755608538	24	8	58	8.49	73781	39523	25542	0	6	Pass2	PepFrag2	None	12605963	SMVTEYGMSKK	SMVTEYGMSKK	541	11	9.63	601	1	1	0	0	2530700	48433		39	1.4	y9	176857	1160	133474497242446	934744972424457	0.0152	Red	3770	12605598	12605612	163863	1121	1121.00	2.00	2
20	NCDO2118_RS00110	ATP-dependent zinc metalloprotease FtsH 26105:28192 forward MW:75561	Regular	2754886	0	755608538	24	8	58	8.49	73781	39523	25542	0	7	Pass2	PepFrag2	None	26783593	IENVTMQPSDSLITVTGEYKEPVK	IENVTMQPSDSLITVTGEYKEPVK	57	24	4.16	598	0	0	0	0	1402991	45872	Identified	32	1.7	b7	335046	2503	222877828243123	108585218828749	0.0106	Red	8978	26783372	26783327	474642	782	782.00	3.00	3
20	NCDO2118_RS00110	ATP-dependent zinc metalloprotease FtsH 26105:28192 forward MW:75561	Regular	2754886	0	755608538	24	8	58	8.49	73781	39523	25542	0	8	Pass2	VarMod	Phosphoryl STY(22)	31423524	TFEESLKDANANVDDFSNINIYNGDEK	TFEESLKDANANVDDFSNINIYNGDEK	650	27	3.63	600	2	2	0	0	2167719	47761		3856	3.5	b13y9*y11y13*y27	347853	2750	237309302808562	118206201872375	0.0753	Red	4606	31423419	31423306	189142	5555	5555.00	3.11	3
20	NCDO2118_RS00110	ATP-dependent zinc metalloprotease FtsH 26105:28192 forward MW:75561	Regular	13097340	0	755608538	75	14	58	22.30	185237	118120	94764	1	1	Pass1	PepFrag1	None	35457226	IGGYMLALPDEEIMQPTNFHLQDQLASLMGGR	IGGYMLALPDEEIMQPTNFHLQDQLASLMGGR	483	32	4.06	1139	5	5	0	0	12259170	62056	Identified	27081	8.0	b11b18b32y10y11y13y17y32	407785	3292	267546650671313	138364433780876	0.2389	Green	20130	35457416	35457212	382287	44244	44244.00	3.23	3
20	NCDO2118_RS00110	ATP-dependent zinc metalloprotease FtsH 26105:28192 forward MW:75561	Regular	13097340	0	755608538	75	14	58	22.30	185237	118120	94764	0	2	Pass1	PepFrag1	None	14087907	SDVLDPALLRPGR	SDVLDPALLRPGR	341	13	6.95	1133	10	10	5	2	92563690	70836	Identified	29834	5.7	b2b3b3b4y3y5y6y8y9y10y11y13	238418	1323	145702229398225	105702229398225	0.2304	Green	10272	14087886	14087900	255982	42682	42682.00	2.48	2
20	NCDO2118_RS00110	ATP-dependent zinc metalloprotease FtsH 26105:28192 forward MW:75561	Regular	13097340	0	755608538	75	14	58	22.30	185237	118120	94764	0	3	Pass1	PepFrag1	None	13187253	QELVEVVDFLK	QELVEVVDFLK	202	11	3.83	1134	14	14	11	3	446955400	77674		9920	4.8	b2b2*b2b3b3*b4b4*b6b7*b8b11y2y3y4y5y6y7y8y9y10y11	349995	1256	140740598584399	100740598584399	0.1684	Green	18643	13187256	13187274	355973	31194	31194.00	1.98	2
20	NCDO2118_RS00110	ATP-dependent zinc metalloprotease FtsH 26105:28192 forward MW:75561	Regular	13097340	0	755608538	75	14	58	22.30	185237	118120	94764	0	4	Pass1	PepFrag1	None	8975404	VLVGAPDVK	VLVGAPDVK	358	9	6.78	1131	9	9	5	2	173770000	73572	Identified	11965	4.1	b2b5y2y3y4y5y5y6y7y8y9	184950	870	110180769869336	701807698693355	0.1312	Green	3308	8975404	8975434	184031	24304	24304.00	1.77	2
20	NCDO2118_RS00110	ATP-dependent zinc metalloprotease FtsH 26105:28192 forward MW:75561	Regular	13097340	0	755608538	75	14	58	22.30	185237	118120	94764	0	5	Pass1	PepFrag1	None	8285189	AIAEALLK	AIAEALLK	611	8	7.00	1132	9	9	5	3	61525270	69062		3078	3.0	b2b4b5b6y2y3y4y5y8	226915	817	105659286072213	171318572144426	0.0650	Green	7053	8285195	8285210	225016	12033	12033.00	1.32	1
20	NCDO2118_RS00110	ATP-dependent zinc metalloprotease FtsH 26105:28192 forward MW:75561	Regular	13097340	0	755608538	75	14	58	22.30	185237	118120	94764	0	6	Pass1	PepFrag1	None	17169167	TAPSIIFIDEIDAVGR	TAPSIIFIDEIDAVGR	283	16	3.70	1135	4	4	0	0	19656300	64107	Identified	624	2.3	b13y5y14y16	359946	1613	166283521182289	126283521182289	0.0157	Green	20107	17169104	17169097	381735	2901	2901.00	2.00	2
20	NCDO2118_RS00110	ATP-dependent zinc metalloprotease FtsH 26105:28192 forward MW:75561	Regular	13097340	0	755608538	75	14	58	22.30	185237	118120	94764	0	7	Pass1	PepFrag1	None	9645098	DLFENAKK	DLFENAKK	275	8	7.00	1138	1	1	0	0	6853162	59531		51	1.7	y6	136316	892	112030481817647	720304818176469	0.0144	Green	3362	9645053	9645082	184574	2659	2659.00	2.00	2
20	NCDO2118_RS00110	ATP-dependent zinc metalloprotease FtsH 26105:28192 forward MW:75561	Regular	13097340	0	755608538	75	14	58	22.30	185237	118120	94764	0	8	Pass1	PepFrag1	None	5453657	TLLAK	TLLAK	239	5	10.10	1137	4	4	1	1	27370190	65545		266	1.2	b2b3y3y5	135469	543	804685521509633	120937104301927	0.0076	Green	5140	5453627	5453643	205458	1400	1400.00	1.00	1
20	NCDO2118_RS00110	ATP-dependent zinc metalloprotease FtsH 26105:28192 forward MW:75561	Regular	13097340	0	755608538	75	14	58	22.30	185237	118120	94764	0	9	Pass2	PepFrag2	None	22251006	IENVTMQPSDSLITVTGEYK	IENVTMQPSDSLITVTGEYK	57	20	3.83	1136	0	0	0	0	1410519	52666	Missing	35	2.2	y4	295091	2064	195989480989022	906596539926812	0.0109	Yellow	12084	22251232	22251238	275312	2013	2013.00	3.00	3
20	NCDO2118_RS00110	ATP-dependent zinc metalloprotease FtsH 26105:28192 forward MW:75561	Regular	13097340	0	755608538	75	14	58	22.30	185237	118120	94764	0	10	Pass2	MissedCleavage	None	17408473	TGKMPDEAAAAEVPEPK	TGKMPDEAAAAEVPEPK	633	17	4.16	1140	3	3	1	0	2273172	54738	Identified	491	1.7	b5b9b10b13y4y17	179516	1596	16511311045878	700754069725201	0.0062	Yellow	4383	17408522	17408565	196653	1157	1157.00	2.58	3
20	NCDO2118_RS00110	ATP-dependent zinc metalloprotease FtsH 26105:28192 forward MW:75561	Regular	13097340	0	755608538	75	14	58	22.30	185237	118120	94764	0	11	Pass2	VarMod	Phosphoryl STY(*)	20810427	TAPSIIFIDEIDAVGRQR	TAPSIIFIDEIDAVGRQR	283	18	4.31	1143	7	7	0	3	5246415	58370	Missing	10173	3.7	b7b11b13b14-H3PO4b17b17y1y5y7y7*y15*y18	320069	1875	183834555316206	143834555316206	0.0490	Green	12149	20810417	20810375	276200	9069	9069.00	2.17	2
20	NCDO2118_RS00110	ATP-dependent zinc metalloprotease FtsH 26105:28192 forward MW:75561	Regular	13097340	0	755608538	75	14	58	22.30	185237	118120	94764	0	12	Pass2	VarMod	Oxidation M(29)	35617175	IGGYMLALPDEEIMQPTNFHLQDQLASLMGGR	IGGYMLALPDEEIMQPTNFHLQDQLASLMGGR	483	32	4.06	1142	4	4	0	0	6523963	59317	Identified	423	3.3	b7y6y7y9*y11y24	407785	3292	267546650671313	937733253356567	0.0201	Green	17671	35617190	35617190	339579	3732	3732.00	4.00	4
20	NCDO2118_RS00110	ATP-dependent zinc metalloprotease FtsH 26105:28192 forward MW:75561	Regular	13097340	0	755608538	75	14	58	22.30	185237	118120	94764	0	13	Pass2	VarMod	Oxidation M(10)	17028720	YETLDAKQIMSLFK	YETLDAKQIMSLFK	619	14	6.95	1144	2	2	0	0	3832533	57007		199	2.2	b9b12b14*y10*	306215	1589	164629969982005	124629969982005	0.0166	Green	14616	17028834	17028829	302624	3082	3082.00	2.00	2
20	NCDO2118_RS00110	ATP-dependent zinc metalloprotease FtsH 26105:28192 forward MW:75561	Regular	13097340	0	755608538	75	14	58	22.30	185237	118120	94764	0	14	Pass2	VarMod	Oxidation M(*)	35617175	IGGYMLALPDEEIMQPTNFHLQDQLASLMGGR	IGGYMLALPDEEIMQPTNFHLQDQLASLMGGR	483	32	4.06	1141	2	2	0	0	1754359	53613	Missing	577	3.0	y11y13*y30	407785	3292	267546650671313	138364433780876	0.0165	Yellow	19106	35617150	35616943	363725	3060	3060.00	3.00	3
20	NCDO2118_RS00110	ATP-dependent zinc metalloprotease FtsH 26105:28192 forward MW:75561	Regular	13097340	0	755608538	75	14	58	22.30	185237	118120	94764	0	15	Pass2	InSource	None	8795523	PALLRPGR	SDVLDPALLRPGR	346	8	12.40	1133	1	1	0	0	6458212	0.0000	Missing	47	0.0	b3	238418	839	107547654026365	675476540263647	0.0092	Green	10294	8795480	8795509	256157	1707	1707.00	2.00	2
20	NCDO2118_RS00110	ATP-dependent zinc metalloprotease FtsH 26105:28192 forward MW:75561	Regular	8493726	0	755608538	78	17	58	31.22	203375	128306	70802	1	1	Pass1	PepFrag1	None	8364149	DLFENAK	DLFENAK	275	7	4.07	3769	2	2	0	0	6467941	57399		20471	5.6	b2b7y5y7y7*	169573	757	10042077156173	604207715617304	0.3722	Yellow	6355	8364091	8364115	232964	75695	75695.00	1.66	2
20	NCDO2118_RS00110	ATP-dependent zinc metalloprotease FtsH 26105:28192 forward MW:75561	Regular	8493726	0	755608538	78	17	58	31.22	203375	128306	70802	0	2	Pass1	PepFrag1	None	8285189	AIAEALLK	AIAEALLK	611	8	7.00	3759	13	13	11	5	366535300	74932		8662	4.1	b3b4b5b6b6b7y1y2y3y4y5y6y7y8	235948	817	105659286072213	171318572144426	0.1382	Green	3723	8285199	8285220	212622	28116	28116.00	1.29	1
20	NCDO2118_RS00110	ATP-dependent zinc metalloprotease FtsH 26105:28192 forward MW:75561	Regular	8493726	0	755608538	78	17	58	31.22	203375	128306	70802	0	3	Pass1	PepFrag1	None	8664804	QIMSLFK	QIMSLFK	626	7	10.10	3762	12	12	9	4	220277100	72721		6021	3.7	b2b3b3*b4b4*b5b5b6*b6b7y1y2y3y4y5y6y7	238800	829	106691377218832	666913772188325	0.1204	Green	12354	8664839	8664863	268131	24495	24495.00	1.56	2
20	NCDO2118_RS00110	ATP-dependent zinc metalloprotease FtsH 26105:28192 forward MW:75561	Regular	8493726	0	755608538	78	17	58	31.22	203375	128306	70802	0	4	Pass1	PepFrag1	None	15948475	NFQAYIIPTDSVVK	NFQAYIIPTDSVVK	99	14	6.78	3766	3	3	1	0	5823999	56943	Identified	390	4.7	b12*y2y3y7y14*	330852	1493	157930559037942	117930559037942	0.1168	Yellow	44499	15948466	15948475	431039	23762	23762.00	2.00	2
20	NCDO2118_RS00110	ATP-dependent zinc metalloprotease FtsH 26105:28192 forward MW:75561	Regular	8493726	0	755608538	78	17	58	31.22	203375	128306	70802	0	5	Pass1	PepFrag1	None	14087907	SDVLDPALLRPGR	SDVLDPALLRPGR	341	13	6.95	3760	5	5	2	0	23651690	63030	Identified	6920	3.6	b10y8y9y10y11y13	238610	1323	145702229398225	571348195988164	0.0590	Green	8766	14087768	14087804	248541	11999	11999.00	2.51	3
20	NCDO2118_RS00110	ATP-dependent zinc metalloprotease FtsH 26105:28192 forward MW:75561	Regular	8493726	0	755608538	78	17	58	31.22	203375	128306	70802	0	6	Pass1	PepFrag1	None	17169167	TAPSIIFIDEIDAVGR	TAPSIIFIDEIDAVGR	283	16	3.70	3763	6	6	1	1	21839230	62683	Identified	2568	3.1	b3b4b5b6b9y8y13y14	379344	1613	166283521182289	126283521182289	0.0323	Green	37362	17169095	17169098	374952	6567	6567.00	2.00	2
20	NCDO2118_RS00110	ATP-dependent zinc metalloprotease FtsH 26105:28192 forward MW:75561	Regular	8493726	0	755608538	78	17	58	31.22	203375	128306	70802	0	7	Pass1	PepFrag1	None	14058049	IPAGVLLEGPPGTGK	IPAGVLLEGPPGTGK	224	15	7.00	3761	6	6	1	1	6573145	57469	Missing	2828	3.0	b5b6y7y10y10y13y15	245533	1343	147166956772518	107166956772518	0.0316	Yellow	9768	14057949	14057965	254900	6422	6422.00	2.00	2
20	NCDO2118_RS00110	ATP-dependent zinc metalloprotease FtsH 26105:28192 forward MW:75561	Regular	8493726	0	755608538	78	17	58	31.22	203375	128306	70802	0	8	Pass1	PepFrag1	None	39460305	NKPLASDVDLHNVATQTPGYVGADLENVLNEAALVAAR	NKPLASDVDLHNVATQTPGYVGADLENVLNEAALVAAR	378	38	4.20	3764	8	8	0	0	7698712	58155	Missing	1692	3.6	b10*b11*b12b14b14b21b25y3y5y9y11*y12y13y18y24*y28y38*	475586	3680	288176246240716	104088123120358	0.0206	Yellow	43799	39460323	39460275	424440	4197	4197.00	3.65	4
20	NCDO2118_RS00110	ATP-dependent zinc metalloprotease FtsH 26105:28192 forward MW:75561	Regular	8493726	0	755608538	78	17	58	31.22	203375	128306	70802	0	9	Pass1	PepFrag1	None	5453657	TLLAK	TLLAK	239	5	10.10	3768	1	1	0	0	5721867	56866		151	1.7	b2y3	121612	543	804685521509633	120937104301927	0.0204	Yellow	5810	5453622	5453642	228623	4156	4156.00	1.00	1
20	NCDO2118_RS00110	ATP-dependent zinc metalloprotease FtsH 26105:28192 forward MW:75561	Regular	8493726	0	755608538	78	17	58	31.22	203375	128306	70802	0	10	Pass1	PepFrag1	None	13187253	QELVEVVDFLK	QELVEVVDFLK	202	11	3.83	3767	2	2	0	0	4234744	55559		241	1.7	b3b3*b6	349602	1256	140740598584399	100740598584399	0.0094	Yellow	31806	13187341	13187359	349199	1904	1904.00	2.00	2
20	NCDO2118_RS00110	ATP-dependent zinc metalloprotease FtsH 26105:28192 forward MW:75561	Regular	8493726	0	755608538	78	17	58	31.22	203375	128306	70802	0	11	Pass1	PepFrag1	None	20460390	LGEEIVFGVATPGASNDIEK	LGEEIVFGVATPGASNDIEK	515	20	3.69	3771	1	1	0	0	1377692	50683	Missing	375	1.7	b7y1y19	333651	1900	185465030305411	145465030305411	0.0053	Red	28519	20460294	20460276	335754	1070	1070.00	2.00	2
20	NCDO2118_RS00110	ATP-dependent zinc metalloprotease FtsH 26105:28192 forward MW:75561	Regular	8493726	0	755608538	78	17	58	31.22	203375	128306	70802	0	12	Pass1	PepFrag1	None	31905685	EQTLNQLLVEMDGFQDDGNSVIVIAATNR	EQTLNQLLVEMDGFQDDGNSVIVIAATNR	312	29	3.43	3770	1	1	0	0	2447721	53179		803	1.8	b6*b7b12*b19*b29*y15y29*	429317	2952	248792453491589	125861635661059	0.0041	Red	50554	31905762	31905680	510331	826	826.00	3.00	3
20	NCDO2118_RS00110	ATP-dependent zinc metalloprotease FtsH 26105:28192 forward MW:75561	Regular	8493726	0	755608538	78	17	58	31.22	203375	128306	70802	0	13	Pass2	PepFrag2	None	10705551	ISYSQLMTK	ISYSQLMTK	43	9	9.72	3765	2	2	0	0	7900351	58267		458	1.7	b5y3y7y8	190257	1001	120980586572634	809805865726335	0.0101	Yellow	2579	10705662	10705685	199863	2055	2055.00	2.00	2
20	NCDO2118_RS00110	ATP-dependent zinc metalloprotease FtsH 26105:28192 forward MW:75561	Regular	8493726	0	755608538	78	17	58	31.22	203375	128306	70802	0	14	Pass2	PepFrag2	None	8534302	TFEESLK	TFEESLK	650	7	4.26	3775	0	0	0	0	1318118	50491		32	1.2	y5	161367	778	102269476338066	164538952676133	0.0053	Red	10653	8534244	8534264	260002	1071	1071.00	1.00	1
20	NCDO2118_RS00110	ATP-dependent zinc metalloprotease FtsH 26105:28192 forward MW:75561	Regular	8493726	0	755608538	78	17	58	31.22	203375	128306	70802	0	15	Pass2	MissedCleavage	None	27523710	LDGNKIENVTMQPSDSLITVTGEYK	LDGNKIENVTMQPSDSLITVTGEYK	52	25	4.06	3772	5	5	0	0	8484185	58577	Identified	13588	2.3	b6b13b18y1y3y3y7y9y13y15y20*	311818	2558	2261309432483	730654716241501	0.0090	Yellow	28707	27523770	27523794	336381	1833	1833.00	3.48	4
20	NCDO2118_RS00110	ATP-dependent zinc metalloprotease FtsH 26105:28192 forward MW:75561	Regular	8493726	0	755608538	78	17	58	31.22	203375	128306	70802	0	16	Pass2	MissedCleavage	None	26954050	LGEEIVFGVATPGASNDIEKATHIAR	LGEEIVFGVATPGASNDIEKATHIAR	515	26	4.63	3773	1	1	0	0	1350909	50597	Identified	534	2.3	y2y10y15y24	308850	2517	223708135347424	718540676737121	0.0087	Red	19474	26954085	26954111	299007	1766	1766.00	3.72	4
20	NCDO2118_RS00110	ATP-dependent zinc metalloprotease FtsH 26105:28192 forward MW:75561	Regular	8493726	0	755608538	78	17	58	31.22	203375	128306	70802	0	17	Pass2	VarMod	Phosphoryl STY(5)	27423974	EIVAYHEAGHAIVGLVLENGSTVRK	EIVAYHEAGHAIVGLVLENGSTVRK	450	25	6.04	3774	6	6	0	0	3327144	54512		4483	3.6	b3b5b14b15b16y6y9y16*y17y25	295319	2510	22329317476201	18329317476201	0.0319	Red	39074	27423882	27423801	383465	6478	6478.00	2.27	2
20	NCDO2118_RS00110	ATP-dependent zinc metalloprotease FtsH 26105:28192 forward MW:75561	Regular	8493726	0	755608538	78	17	58	31.22	203375	128306	70802	0	18	Pass2	InSource	None	7384219	IMSLFK	QIMSLFK	627	6	10.10	3762	4	4	1	1	11086300	0.0000		585	0.0	b2b3y3y6	238800	715	96671174575233	153342349150466	0.0047	Green	12374	7384203	7384225	268167	963	963.00	1.00	1
20	NCDO2118_RS00110	ATP-dependent zinc metalloprotease FtsH 26105:28192 forward MW:75561	Regular	23336450	0	755608538	98	15	58	27.63	213854	144503	107689	1	1	Pass1	PepFrag1	None	14087907	SDVLDPALLRPGR	SDVLDPALLRPGR	341	13	6.95	955	12	12	7	2	239099900	77466	Identified	60889	7.1	b2b3b4b10b12y3y6y7y8y9y9y10y11y12y13	234497	1323	145702229398225	105702229398225	0.3594	Green	10111	14087892	14087912	253900	76851	76851.00	2.40	2
20	NCDO2118_RS00110	ATP-dependent zinc metalloprotease FtsH 26105:28192 forward MW:75561	Regular	23336450	0	755608538	98	15	58	27.63	213854	144503	107689	0	2	Pass1	PepFrag1	None	8285189	AIAEALLK	AIAEALLK	611	8	7.00	954	14	14	12	6	679278500	82001		11605	4.5	b2b3b4b4b5b5b6b6b7y1y2y3y4y5y6y7y8	225288	817	105659286072213	171318572144426	0.1656	Green	6738	8285199	8285216	224482	35407	35407.00	1.30	1
20	NCDO2118_RS00110	ATP-dependent zinc metalloprotease FtsH 26105:28192 forward MW:75561	Regular	23336450	0	755608538	98	15	58	27.63	213854	144503	107689	0	3	Pass1	PepFrag1	None	13187253	QELVEVVDFLK	QELVEVVDFLK	202	11	3.83	956	14	14	10	3	379197700	79469		10928	4.8	b2b2*b2b3b3*b3b4*b4b5*b6*b7b7b11y2y3y4y5y6y7y7y8y9y10y11	344423	1256	140740598584399	100740598584399	0.1508	Green	19189	13187218	13187240	355050	32245	32245.00	1.98	2
20	NCDO2118_RS00110	ATP-dependent zinc metalloprotease FtsH 26105:28192 forward MW:75561	Regular	23336450	0	755608538	98	15	58	27.63	213854	144503	107689	0	4	Pass1	PepFrag1	None	8975404	VLVGAPDVK	VLVGAPDVK	358	9	6.78	953	12	12	7	4	200966500	76712	Identified	14286	4.3	b2b3b5b7b8b8y2y3y4y5y5y6y7y8y9	184453	870	110180769869336	701807698693355	0.1299	Green	2820	8975435	8975463	183707	27784	27784.00	1.74	2
20	NCDO2118_RS00110	ATP-dependent zinc metalloprotease FtsH 26105:28192 forward MW:75561	Regular	23336450	0	755608538	98	15	58	27.63	213854	144503	107689	0	5	Pass1	PepFrag1	None	17169167	TAPSIIFIDEIDAVGR	TAPSIIFIDEIDAVGR	283	16	3.70	957	9	9	4	1	64682960	71788	Identified	1899	3.2	b5b5b6b6b15y2y11y12y13y14y16	359178	1613	166283521182289	126283521182289	0.0338	Green	20517	17169163	17169169	380183	7222	7222.00	2.00	2
20	NCDO2118_RS00110	ATP-dependent zinc metalloprotease FtsH 26105:28192 forward MW:75561	Regular	23336450	0	755608538	98	15	58	27.63	213854	144503	107689	0	6	Pass1	PepFrag1	None	11815321	FADVAGSEEEK	FADVAGSEEEK	191	11	3.69	958	2	2	0	0	4737627	60436		175	1.9	b6y2y7y9	170993	1048	124738491959315	847384919593145	0.0122	Green	4309	11815274	11815299	200247	2604	2604.00	2.00	2
20	NCDO2118_RS00110	ATP-dependent zinc metalloprotease FtsH 26105:28192 forward MW:75561	Regular	23336450	0	755608538	98	15	58	27.63	213854	144503	107689	0	7	Pass1	PepFrag1	None	30623861	TFEESLKDANANVDDFSNINIYNGDEK	TFEESLKDANANVDDFSNINIYNGDEK	650	27	3.63	962	1	1	0	0	1266129	54705		87	2.5	b8y13*	312803	2750	237309302808562	118206201872375	0.0105	Yellow	18591	30623967	30623903	344960	2255	2255.00	3.00	3
20	NCDO2118_RS00110	ATP-dependent zinc metalloprotease FtsH 26105:28192 forward MW:75561	Regular	23336450	0	755608538	98	15	58	27.63	213854	144503	107689	0	8	Pass1	PepFrag1	None	5453657	TLLAK	TLLAK	239	5	10.10	959	3	3	1	1	12928360	64796		142	1.2	b3y2y3	129289	543	804685521509633	120937104301927	0.0078	Green	4664	5453627	5453645	204648	1673	1673.00	1.00	1
20	NCDO2118_RS00110	ATP-dependent zinc metalloprotease FtsH 26105:28192 forward MW:75561	Regular	23336450	0	755608538	98	15	58	27.63	213854	144503	107689	0	9	Pass1	PepFrag1	None	16997843	TYSEATAVMIDDEVR	TYSEATAVMIDDEVR	574	15	3.59	961	2	2	0	1	19035970	66476		78	1.8	b2y13	263170	1540	161227869348147	121227869348147	0.0074	Green	8682	16997845	16997852	242247	1589	1589.00	2.00	2
20	NCDO2118_RS00110	ATP-dependent zinc metalloprotease FtsH 26105:28192 forward MW:75561	Regular	23336450	0	755608538	98	15	58	27.63	213854	144503	107689	0	10	Pass1	PepFrag1	None	35457226	IGGYMLALPDEEIMQPTNFHLQDQLASLMGGR	IGGYMLALPDEEIMQPTNFHLQDQLASLMGGR	483	32	4.06	960	2	2	1	0	6187706	61596	Missing	559	1.8	b32*y8y9y10	403629	3292	267546650671313	138364433780876	0.0037	Green	21270	35457402	35457270	401493	789	789.00	3.00	3
20	NCDO2118_RS00110	ATP-dependent zinc metalloprotease FtsH 26105:28192 forward MW:75561	Regular	23336450	0	755608538	98	15	58	27.63	213854	144503	107689	0	11	Pass2	PepFrag2	None	8364149	DLFENAK	DLFENAK	275	7	4.07	967	2	2	1	0	1595596	55710		1496	1.6	b7y6y7	171458	757	10042077156173	160841543123461	0.0121	Yellow	5044	8364290	8364307	208545	2591	2591.00	1.00	1
20	NCDO2118_RS00110	ATP-dependent zinc metalloprotease FtsH 26105:28192 forward MW:75561	Regular	23336450	0	755608538	98	15	58	27.63	213854	144503	107689	0	12	Pass2	PepFrag2	None	14486322	EINAADIDEGMDR	EINAADIDEGMDR	420	13	3.43	966	1	1	0	0	1219089	54541		310	2.0	b12	225213	1289	143195129239694	554634194931295	0.0109	Yellow	9492	14486260	14486307	247540	2337	2337.00	3.00	3
20	NCDO2118_RS00110	ATP-dependent zinc metalloprotease FtsH 26105:28192 forward MW:75561	Regular	23336450	0	755608538	98	15	58	27.63	213854	144503	107689	0	13	Pass2	VarMod	Oxidation M(29)	35617175	IGGYMLALPDEEIMQPTNFHLQDQLASLMGGR	IGGYMLALPDEEIMQPTNFHLQDQLASLMGGR	483	32	4.06	965	4	4	0	0	2474081	57614	Missing	569	2.7	b11b14y7y8y8y10y20y30*	403629	3292	267546650671313	937733253356567	0.0101	Green	18092	35617325	35617325	337869	2158	2158.00	4.00	4
20	NCDO2118_RS00110	ATP-dependent zinc metalloprotease FtsH 26105:28192 forward MW:75561	Regular	23336450	0	755608538	98	15	58	27.63	213854	144503	107689	0	14	Pass2	VarMod	Oxidation M(5)	35617175	IGGYMLALPDEEIMQPTNFHLQDQLASLMGGR	IGGYMLALPDEEIMQPTNFHLQDQLASLMGGR	483	32	4.06	964	4	4	2	0	6220559	61619	Identified	1292	2.4	b7b8b9b10b11y6y17y24*y31y32*	403629	3292	267546650671313	138364433780876	0.0077	Green	18955	35617442	35617308	350699	1654	1654.00	3.61	3
20	NCDO2118_RS00110	ATP-dependent zinc metalloprotease FtsH 26105:28192 forward MW:75561	Regular	23336450	0	755608538	98	15	58	27.63	213854	144503	107689	0	15	Pass2	VarMod	Phosphoryl STY(21);Phosphoryl STY(22)	28223637	EIVAYHEAGHAIVGLVLENGSTVRK	EIVAYHEAGHAIVGLVLENGSTVRK	450	25	6.04	963	1	1	0	0	870083	53076		320	1.8	b9y7-2(H3PO4)y10*y25*	298954	2510	22329317476201	108862116508007	0.0045	Yellow	10701	28223531	28223495	258955	971	971.00	3.00	3
20	NCDO2118_RS00110	ATP-dependent zinc metalloprotease FtsH 26105:28192 forward MW:75561	Regular	23336450	0	755608538	98	15	58	27.63	213854	144503	107689	0	16	Pass2	InSource	None	5863195	GAPDVK	VLVGAPDVK	361	6	6.78	953	6	6	3	0	99255820	0.0000	Identified	2305	0.0	b5b6y2y4y5y6	184453	536	797754924937232	119550984987446	0.0516	Green	2811	5863187	5863206	183644	11035	11035.00	1.00	1
20	NCDO2118_RS00110	ATP-dependent zinc metalloprotease FtsH 26105:28192 forward MW:75561	Regular	23336450	0	755608538	98	15	58	27.63	213854	144503	107689	0	17	Pass2	InSource	None	8795523	PALLRPGR	SDVLDPALLRPGR	346	8	12.40	955	4	4	1	0	4921289	0.0000	Identified	320	0.0	b2b3b5b7	234497	839	107547654026365	675476540263647	0.0114	Green	10115	8795474	8795502	253924	2443	2443.00	2.00	2
20	NCDO2118_RS00110	ATP-dependent zinc metalloprotease FtsH 26105:28192 forward MW:75561	Regular	23336450	0	755608538	98	15	58	27.63	213854	144503	107689	0	18	Pass2	InSource	None	5733606	EALLK	AIAEALLK	614	5	7.00	954	5	5	1	1	35366530	0.0000		429	0.0	b2b3b5y2y5	225288	559	820416096842264	124083219368453	0.0105	Green	6735	5733580	5733599	224468	2246	2246.00	1.00	1
20	NCDO2118_RS00110	ATP-dependent zinc metalloprotease FtsH 26105:28192 forward MW:75561	Regular	9684977	0	755608538	38	6	58	4.46	107536	99851	42515	1	1	Pass1	PepFrag1	None	14486322	EINAADIDEGMDR	EINAADIDEGMDR	420	13	3.43	715	22	22	18	8	455022700	76441		36542	7.3	b2b2b3b3b4b4b5b5b6b6b7b7b9b12b13y1y2y3y4y5y5y6y6y7y7y8y9y10y11y11y12y13	221026	1289	143195129239694	103195129239694	0.7842	Green	6378	14486240	14486249	204683	84331	84331.00	1.99	2
20	NCDO2118_RS00110	ATP-dependent zinc metalloprotease FtsH 26105:28192 forward MW:75561	Regular	9684977	0	755608538	38	6	58	4.46	107536	99851	42515	0	2	Pass1	PepFrag1	None	8394145	YETLDAK	YETLDAK	619	7	4.07	713	6	6	2	0	74752030	68597		2014	2.5	b3b5b5y3y5y6y7	120295	760	100685909104663	161371818209326	0.0810	Yellow	2522	8394144	8394155	135886	8709	8709.00	1.50	1
20	NCDO2118_RS00110	ATP-dependent zinc metalloprotease FtsH 26105:28192 forward MW:75561	Regular	9684977	0	755608538	38	6	58	4.46	107536	99851	42515	0	3	Pass1	PepFrag1	None	11815321	FADVAGSEEEK	FADVAGSEEEK	191	11	3.69	714	6	6	2	1	25704130	63961		1061	2.7	b2b3y3y6y9y10	178841	1048	124738491959315	847384919593145	0.0633	Yellow	3182	11815312	11815328	146736	6811	6811.00	2.00	2
20	NCDO2118_RS00110	ATP-dependent zinc metalloprotease FtsH 26105:28192 forward MW:75561	Regular	9684977	0	755608538	38	6	58	4.46	107536	99851	42515	0	4	Pass2	PepFrag2	None	11325013	SMVTEYGMSK	SMVTEYGMSK	541	10	6.89	717	3	3	0	0	818315	48990		2638	2.2	b1b7y6y10	198311	1025	12290669611554	829066961155399	0.0375	Red	2834	11324725	11324742	140782	4034	4034.00	2.00	2
20	NCDO2118_RS00110	ATP-dependent zinc metalloprotease FtsH 26105:28192 forward MW:75561	Regular	9684977	0	755608538	38	6	58	4.46	107536	99851	42515	0	5	Pass2	PepFrag2	None	8554319	EAIETHR	EAIETHR	600	7	5.30	718	0	0	0	0	224603	43375		42	1.1	b6	68783	768	101391243059154	613912430591538	0.0072	Red	2323	8554158	8554178	132471	779	779.00	2.00	2
20	NCDO2118_RS00110	ATP-dependent zinc metalloprotease FtsH 26105:28192 forward MW:75561	Regular	9684977	0	755608538	38	6	58	4.46	107536	99851	42515	0	6	Pass2	VarMod	Phosphoryl STY(22)	31423524	TFEESLKDANANVDDFSNINIYNGDEK	TFEESLKDANANVDDFSNINIYNGDEK	650	27	3.63	716	0	0	0	0	1025702	49971		117	2.3	b22*y11*y14	342243	2750	237309302808562	118206201872375	0.0160	Red	5385	31423475	31423351	182443	1720	1720.00	3.00	3
20	NCDO2118_RS00110	ATP-dependent zinc metalloprotease FtsH 26105:28192 forward MW:75561	Regular	9684977	0	755608538	38	6	58	4.46	107536	99851	42515	0	7	Pass2	InSource	None	5473086	TLDAK	YETLDAK	621	5	6.78	713	1	1	0	0	680366	0.0000		101	0.0	y5	120295	510	771743685868323	114348737173665	0.0107	Yellow	2521	5473072	5473093	135878	1152	1152.00	1.00	1
20	NCDO2118_RS00110	ATP-dependent zinc metalloprotease FtsH 26105:28192 forward MW:75561	Regular	14755700	0	755608538	76	12	58	20.29	162573	87255	65760	1	1	Pass1	PepFrag1	None	14087907	SDVLDPALLRPGR	SDVLDPALLRPGR	341	13	6.95	980	11	11	7	2	101071700	71736	Identified	34592	5.8	b2b3b4b7b12y7y8y9y9y10y11y12y13	238946	1323	145702229398225	105702229398225	0.2791	Green	8712	14087893	14087911	254531	45380	45380.00	2.54	2
20	NCDO2118_RS00110	ATP-dependent zinc metalloprotease FtsH 26105:28192 forward MW:75561	Regular	14755700	0	755608538	76	12	58	20.29	162573	87255	65760	0	2	Pass1	PepFrag1	None	8285189	AIAEALLK	AIAEALLK	611	8	7.00	979	11	11	8	5	471372900	78423		6648	3.8	b2b3b4b5b5b6y2y3y4y5y6y8	223909	817	105659286072213	171318572144426	0.1444	Green	5767	8285197	8285215	224432	23476	23476.00	1.32	1
20	NCDO2118_RS00110	ATP-dependent zinc metalloprotease FtsH 26105:28192 forward MW:75561	Regular	14755700	0	755608538	76	12	58	20.29	162573	87255	65760	0	3	Pass1	PepFrag1	None	8975404	VLVGAPDVK	VLVGAPDVK	358	9	6.78	986	10	10	6	2	179942600	74241	Identified	9061	3.7	b2b7b7b8y2y3y4y5y5y6y7y8y9	184854	870	110180769869336	701807698693355	0.1132	Green	2595	8975411	8975441	183658	18399	18399.00	1.78	2
20	NCDO2118_RS00110	ATP-dependent zinc metalloprotease FtsH 26105:28192 forward MW:75561	Regular	14755700	0	755608538	76	12	58	20.29	162573	87255	65760	0	4	Pass1	PepFrag1	None	13187253	QELVEVVDFLK	QELVEVVDFLK	202	11	3.83	983	11	11	7	2	244515300	75573		4934	3.9	b2b2*b2b3*b7b8b11y2y3y4y5y6y7y8y9	346012	1256	140740598584399	100740598584399	0.1119	Green	15599	13187248	13187269	355087	18198	18198.00	2.00	2
20	NCDO2118_RS00110	ATP-dependent zinc metalloprotease FtsH 26105:28192 forward MW:75561	Regular	14755700	0	755608538	76	12	58	20.29	162573	87255	65760	0	5	Pass1	PepFrag1	None	17169167	TAPSIIFIDEIDAVGR	TAPSIIFIDEIDAVGR	283	16	3.70	984	6	6	1	0	29654790	66411	Identified	1495	2.5	b5b6y2y6y10y11y14y16	356668	1613	166283521182289	126283521182289	0.0220	Green	16600	17169137	17169138	380577	3579	3579.00	2.00	2
20	NCDO2118_RS00110	ATP-dependent zinc metalloprotease FtsH 26105:28192 forward MW:75561	Regular	14755700	0	755608538	76	12	58	20.29	162573	87255	65760	0	6	Pass1	PepFrag1	None	30623861	TFEESLKDANANVDDFSNINIYNGDEK	TFEESLKDANANVDDFSNINIYNGDEK	650	27	3.63	982	1	1	0	0	3904697	57605		191	2.6	b12*b13*y10	318765	2750	237309302808562	118206201872375	0.0142	Green	15159	30623876	30623793	344749	2314	2314.00	3.00	3
20	NCDO2118_RS00110	ATP-dependent zinc metalloprotease FtsH 26105:28192 forward MW:75561	Regular	14755700	0	755608538	76	12	58	20.29	162573	87255	65760	0	7	Pass1	PepFrag1	None	22251006	IENVTMQPSDSLITVTGEYK	IENVTMQPSDSLITVTGEYK	57	20	3.83	981	2	2	0	0	3119220	56630	Missing	287	2.1	b16b20y7y10	297449	2064	195989480989022	906596539926812	0.0110	Yellow	10336	22251055	22251062	274108	1786	1786.00	3.00	3
20	NCDO2118_RS00110	ATP-dependent zinc metalloprotease FtsH 26105:28192 forward MW:75561	Regular	14755700	0	755608538	76	12	58	20.29	162573	87255	65760	0	8	Pass1	PepFrag1	None	35457226	IGGYMLALPDEEIMQPTNFHLQDQLASLMGGR	IGGYMLALPDEEIMQPTNFHLQDQLASLMGGR	483	32	4.06	987	0	0	0	0	4024536	57737	Missing	192	2.3	b24*y10	404789	3292	267546650671313	138364433780876	0.0094	Green	17087	35457385	35457227	397072	1521	1521.00	3.34	3
20	NCDO2118_RS00110	ATP-dependent zinc metalloprotease FtsH 26105:28192 forward MW:75561	Regular	14755700	0	755608538	76	12	58	20.29	162573	87255	65760	0	9	Pass1	PepFrag1	None	5453657	TLLAK	TLLAK	239	5	10.10	985	4	4	1	1	18014420	64246		233	1.1	b2y2y3y5	131821	543	804685521509633	120937104301927	0.0074	Green	4132	5453629	5453648	204758	1200	1200.00	1.00	1
20	NCDO2118_RS00110	ATP-dependent zinc metalloprotease FtsH 26105:28192 forward MW:75561	Regular	14755700	0	755608538	76	12	58	20.29	162573	87255	65760	0	10	Pass2	VarMod	Oxidation M(5)	35617175	IGGYMLALPDEEIMQPTNFHLQDQLASLMGGR	IGGYMLALPDEEIMQPTNFHLQDQLASLMGGR	483	32	4.06	990	5	5	1	0	3804539	57493	Identified	524	3.5	b8b11b12b12b13b16y10y14*	404789	3292	267546650671313	937733253356567	0.0280	Green	14825	35617209	35617209	337791	4554	4554.00	3.66	4
20	NCDO2118_RS00110	ATP-dependent zinc metalloprotease FtsH 26105:28192 forward MW:75561	Regular	14755700	0	755608538	76	12	58	20.29	162573	87255	65760	0	11	Pass2	VarMod	Oxidation M(14)	35617175	IGGYMLALPDEEIMQPTNFHLQDQLASLMGGR	IGGYMLALPDEEIMQPTNFHLQDQLASLMGGR	483	32	4.06	989	1	1	0	0	1480031	53392	Missing	88	2.6	b11y9*	404789	3292	267546650671313	138364433780876	0.0121	Yellow	15454	35617311	35617150	351152	1969	1969.00	3.53	3
20	NCDO2118_RS00110	ATP-dependent zinc metalloprotease FtsH 26105:28192 forward MW:75561	Regular	14755700	0	755608538	76	12	58	20.29	162573	87255	65760	0	12	Pass2	VarMod	Oxidation M(29)	35617175	IGGYMLALPDEEIMQPTNFHLQDQLASLMGGR	IGGYMLALPDEEIMQPTNFHLQDQLASLMGGR	483	32	4.06	988	1	1	0	0	828539	50873	Missing	116	1.9	b11b16	404789	3292	267546650671313	138364433780876	0.0049	Yellow	16499	35617217	35617056	377875	795	795.00	3.00	3
20	NCDO2118_RS00110	ATP-dependent zinc metalloprotease FtsH 26105:28192 forward MW:75561	Regular	14755700	0	755608538	76	12	58	20.29	162573	87255	65760	0	13	Pass2	InSource	None	6443978	AEALLK	AIAEALLK	613	6	7.00	979	8	8	5	3	319366200	0.0000		6308	0.0	b2b3b4y1y2y3y4y6	223909	626	884726813484685	136945362696937	0.1549	Green	5773	6443969	6443987	224463	25175	25175.00	1.00	1
20	NCDO2118_RS00110	ATP-dependent zinc metalloprotease FtsH 26105:28192 forward MW:75561	Regular	14755700	0	755608538	76	12	58	20.29	162573	87255	65760	0	14	Pass2	InSource	None	9945792	DPALLRPGR	SDVLDPALLRPGR	345	9	10.89	980	1	1	0	0	440728	0.0000	Missing	31	0.0	b8	238946	930	115190041098929	751900410989287	0.0549	Green	8738	9945723	9945752	254648	8922	8922.00	2.00	2
20	NCDO2118_RS00110	ATP-dependent zinc metalloprotease FtsH 26105:28192 forward MW:75561	Regular	14755700	0	755608538	76	12	58	20.29	162573	87255	65760	0	15	Pass2	InSource	None	7984720	LVGAPDVK	VLVGAPDVK	359	8	6.78	986	3	3	0	0	64145180	0.0000	Identified	1012	0.0	y4y6y8	184854	765	101127031163723	162254062327446	0.0213	Green	2590	7984696	7984714	183607	3470	3470.00	1.27	1
20	NCDO2118_RS00110	ATP-dependent zinc metalloprotease FtsH 26105:28192 forward MW:75561	Regular	14755700	0	755608538	76	12	58	20.29	162573	87255	65760	0	16	Pass2	InSource	None	8795523	PALLRPGR	SDVLDPALLRPGR	346	8	12.40	980	1	1	0	0	637444	0.0000	Identified	48	0.0	b5	238946	839	107547654026365	675476540263647	0.0113	Green	8730	8795462	8795491	254609	1835	1835.00	2.00	2
20	NCDO2118_RS00110	ATP-dependent zinc metalloprotease FtsH 26105:28192 forward MW:75561	Regular	15888280	0	755608538	72	12	58	18.27	91128	48946	27774	1	1	Pass1	PepFrag1	None	13187253	QELVEVVDFLK	QELVEVVDFLK	202	11	3.83	779	13	13	9	2	248788600	75969		5912	3.9	b2b2b3b3*b3b4*b6*b11y1y2y3y4y5y6y7y8y9y11	343295	1256	140740598584399	100740598584399	0.1983	Green	13722	13187247	13187264	355584	18070	18070.00	1.97	2
20	NCDO2118_RS00110	ATP-dependent zinc metalloprotease FtsH 26105:28192 forward MW:75561	Regular	15888280	0	755608538	72	12	58	18.27	91128	48946	27774	0	2	Pass1	PepFrag1	None	8285189	AIAEALLK	AIAEALLK	611	8	7.00	777	11	11	8	4	529031000	79246		4858	3.4	b2b3b4b4b5b6b7y3y4y5y6y8	226583	817	105659286072213	171318572144426	0.1906	Green	4828	8285190	8285205	225009	17366	17366.00	1.40	1
20	NCDO2118_RS00110	ATP-dependent zinc metalloprotease FtsH 26105:28192 forward MW:75561	Regular	15888280	0	755608538	72	12	58	18.27	91128	48946	27774	0	3	Pass1	PepFrag1	None	14087907	SDVLDPALLRPGR	SDVLDPALLRPGR	341	13	6.95	778	10	10	6	3	141564000	73520	Identified	8666	3.8	b2b3b4y3y7y8y9y10y11y13	238671	1323	145702229398225	571348195988164	0.1483	Green	7270	14087875	14087904	255297	13510	13510.00	2.55	3
20	NCDO2118_RS00110	ATP-dependent zinc metalloprotease FtsH 26105:28192 forward MW:75561	Regular	15888280	0	755608538	72	12	58	18.27	91128	48946	27774	0	4	Pass1	PepFrag1	None	8975404	VLVGAPDVK	VLVGAPDVK	358	9	6.78	783	6	6	2	0	4113359	58153	Missing	1662	3.2	b2b7y1y2y5y5y8y9	183590	870	110180769869336	701807698693355	0.1441	Green	2190	8975407	8975434	183956	13136	13136.00	1.84	2
20	NCDO2118_RS00110	ATP-dependent zinc metalloprotease FtsH 26105:28192 forward MW:75561	Regular	15888280	0	755608538	72	12	58	18.27	91128	48946	27774	0	5	Pass1	PepFrag1	None	22251006	IENVTMQPSDSLITVTGEYK	IENVTMQPSDSLITVTGEYK	57	20	3.83	781	3	3	0	0	3202687	57066	Missing	838	3.6	b4b18y20	294235	2064	195989480989022	906596539926812	0.0882	Green	8600	22251138	22251162	274662	8038	8038.00	2.94	3
20	NCDO2118_RS00110	ATP-dependent zinc metalloprotease FtsH 26105:28192 forward MW:75561	Regular	15888280	0	755608538	72	12	58	18.27	91128	48946	27774	0	6	Pass1	PepFrag1	None	17169167	TAPSIIFIDEIDAVGR	TAPSIIFIDEIDAVGR	283	16	3.70	780	11	11	2	1	114911200	72614	Identified	2310	3.2	b5b5b6b6b10b16y2y5y7y7y9y11y13y14	352939	1613	166283521182289	126283521182289	0.0777	Green	14814	17169159	17169156	380932	7085	7085.00	2.00	2
20	NCDO2118_RS00110	ATP-dependent zinc metalloprotease FtsH 26105:28192 forward MW:75561	Regular	15888280	0	755608538	72	12	58	18.27	91128	48946	27774	0	7	Pass1	PepFrag1	None	5453657	TLLAK	TLLAK	239	5	10.10	782	4	4	1	1	30813720	66898		271	1.2	b2y2y3y5	139663	543	804685521509633	120937104301927	0.0154	Green	3457	5453637	5453654	205212	1404	1404.00	1.00	1
20	NCDO2118_RS00110	ATP-dependent zinc metalloprotease FtsH 26105:28192 forward MW:75561	Regular	15888280	0	755608538	72	12	58	18.27	91128	48946	27774	0	8	Pass2	PepFrag2	None	35457226	IGGYMLALPDEEIMQPTNFHLQDQLASLMGGR	IGGYMLALPDEEIMQPTNFHLQDQLASLMGGR	483	32	4.06	785	2	2	0	0	3876275	57895	Missing	83	2.5	y11y31	406336	3292	267546650671313	138364433780876	0.0188	Green	14257	35457463	35457441	367643	1711	1711.00	3.00	3
20	NCDO2118_RS00110	ATP-dependent zinc metalloprotease FtsH 26105:28192 forward MW:75561	Regular	15888280	0	755608538	72	12	58	18.27	91128	48946	27774	0	9	Pass2	PepFrag2	None	11815321	FADVAGSEEEK	FADVAGSEEEK	191	11	3.69	788	0	0	0	0	453995	48581		49	1.6	y4	166802	1048	124738491959315	847384919593145	0.0178	Red	4153	11815445	11815467	216318	1621	1621.00	2.00	2
20	NCDO2118_RS00110	ATP-dependent zinc metalloprotease FtsH 26105:28192 forward MW:75561	Regular	15888280	0	755608538	72	12	58	18.27	91128	48946	27774	0	10	Pass2	PepFrag2	None	14486322	EINAADIDEGMDR	EINAADIDEGMDR	420	13	3.43	784	1	1	0	0	795356	51016		248	1.7	b7*b12	228358	1289	143195129239694	554634194931295	0.0169	Yellow	6771	14486182	14486212	248781	1536	1536.00	3.00	3
20	NCDO2118_RS00110	ATP-dependent zinc metalloprotease FtsH 26105:28192 forward MW:75561	Regular	15888280	0	755608538	72	12	58	18.27	91128	48946	27774	0	11	Pass2	VarMod	Oxidation M(5)	35617175	IGGYMLALPDEEIMQPTNFHLQDQLASLMGGR	IGGYMLALPDEEIMQPTNFHLQDQLASLMGGR	483	32	4.06	787	2	2	0	0	1553939	53925	Missing	143	1.9	y9y6	406336	3292	267546650671313	138364433780876	0.0097	Yellow	14790	35617411	35617389	380093	880	880.00	3.00	3
20	NCDO2118_RS00110	ATP-dependent zinc metalloprotease FtsH 26105:28192 forward MW:75561	Regular	15888280	0	755608538	72	12	58	18.27	91128	48946	27774	0	12	Pass2	VarMod	Oxidation M(14)	35617175	IGGYMLALPDEEIMQPTNFHLQDQLASLMGGR	IGGYMLALPDEEIMQPTNFHLQDQLASLMGGR	483	32	4.06	786	3	3	0	0	2754483	56411	Missing	406	1.8	b3y8y9*y11y26	406336	3292	267546650671313	937733253356567	0.0084	Green	13673	35617233	35617233	354246	767	767.00	4.00	4
20	NCDO2118_RS00110	ATP-dependent zinc metalloprotease FtsH 26105:28192 forward MW:75561	Regular	15888280	0	755608538	72	12	58	18.27	91128	48946	27774	0	13	Pass2	InSource	None	11076633	LDPALLRPGR	SDVLDPALLRPGR	344	10	10.89	778	2	2	1	0	2567242	0.0000	Missing	1749	0.0	y9y10	238671	1054	125214139930828	852141399308275	0.0520	Green	7251	11076587	11076611	255062	4737	4737.00	2.00	2
20	NCDO2118_RS00110	ATP-dependent zinc metalloprotease FtsH 26105:28192 forward MW:75561	Regular	15888280	0	755608538	72	12	58	18.27	91128	48946	27774	0	14	Pass2	InSource	None	7984720	LVGAPDVK	VLVGAPDVK	359	8	6.78	783	4	4	0	0	72239540	0.0000	Identified	579	0.0	b3y4y6y8	183590	765	101127031163723	162254062327446	0.0139	Green	2187	7984714	7984730	183927	1267	1267.00	1.00	1
20	NCDO2118_RS00110	ATP-dependent zinc metalloprotease FtsH 26105:28192 forward MW:75561	Regular	6620322	0.23	755608538	75	20	58	41.15	545704	442677	307477	1	1	Pass1	PepFrag1	None	8534302	TFEESLK	TFEESLK	650	7	4.26	4392	3	3	1	0	3488404	53635		256861	6.0	b7y6y7	161229	778	102269476338066	164538952676133	0.7012	Yellow	12301	8534226	8534251	270413	382650	382650.00	1.03	1
20	NCDO2118_RS00110	ATP-dependent zinc metalloprotease FtsH 26105:28192 forward MW:75561	Regular	6620322	0.23	755608538	75	20	58	41.15	545704	442677	307477	0	2	Pass1	PepFrag1	None	10915844	VRDLFENAK	VRDLFENAK	273	9	7.03	4389	1	1	0	0	4479758	54721		306	4.7	b4y5y9*	118475	1010	12170466260244	817046626024404	0.0672	Yellow	4042	10915824	10915859	216544	36670	36670.00	1.84	2
20	NCDO2118_RS00110	ATP-dependent zinc metalloprotease FtsH 26105:28192 forward MW:75561	Regular	6620322	0.23	755608538	75	20	58	41.15	545704	442677	307477	0	3	Pass1	PepFrag1	None	8664804	QIMSLFK	QIMSLFK	626	7	10.10	4381	8	8	5	2	134710300	69503		4181	3.7	b2b3*b4b4*b5b5b6b7*y3y4y4y5y6y7	231916	829	106691377218832	173382754437665	0.0428	Green	11442	8664751	8664776	266680	23357	23357.00	1.51	1
20	NCDO2118_RS00110	ATP-dependent zinc metalloprotease FtsH 26105:28192 forward MW:75561	Regular	6620322	0.23	755608538	75	20	58	41.15	545704	442677	307477	0	4	Pass1	PepFrag1	None	35457226	IGGYMLALPDEEIMQPTNFHLQDQLASLMGGR	IGGYMLALPDEEIMQPTNFHLQDQLASLMGGR	483	32	4.06	4390	7	7	0	0	25213100	62225	Identified	16917	6.1	b7b13b15b17b20*y1y4y10y11y12y15y16*y17*y21y32	449771	3292	267546650671313	138364433780876	0.0375	Green	35308	35457321	35457200	375976	20466	20466.00	3.04	3
20	NCDO2118_RS00110	ATP-dependent zinc metalloprotease FtsH 26105:28192 forward MW:75561	Regular	6620322	0.23	755608538	75	20	58	41.15	545704	442677	307477	0	5	Pass1	PepFrag1	None	8285189	AIAEALLK	AIAEALLK	611	8	7.00	4379	10	10	6	3	128420700	69295		4703	3.2	b3b4b5b6b7y2y3y4y6y8	233816	817	105659286072213	171318572144426	0.0252	Green	3299	8285194	8285219	210248	13729	13729.00	1.00	1
20	NCDO2118_RS00110	ATP-dependent zinc metalloprotease FtsH 26105:28192 forward MW:75561	Regular	6620322	0.23	755608538	75	20	58	41.15	545704	442677	307477	0	6	Pass1	PepFrag1	None	18078796	LGMVSYEGDHQVFIGR	LGMVSYEGDHQVFIGR	552	16	5.22	4391	4	4	0	0	2234455	51701		1504	3.6	b3y1y6y10*y12	276866	1655	169157646025708	727717640171389	0.0178	Red	3953	18078689	18078723	215825	9717	9717.00	2.95	3
20	NCDO2118_RS00110	ATP-dependent zinc metalloprotease FtsH 26105:28192 forward MW:75561	Regular	6620322	0.23	755608538	75	20	58	41.15	545704	442677	307477	0	7	Pass1	PepFrag1	None	17169167	TAPSIIFIDEIDAVGR	TAPSIIFIDEIDAVGR	283	16	3.70	4384	5	5	1	1	15652400	60155	Missing	1379	3.5	b3b4b5b6b9y2y10	379336	1613	166283521182289	126283521182289	0.0163	Green	34884	17169177	17169195	374033	8870	8870.00	2.03	2
20	NCDO2118_RS00110	ATP-dependent zinc metalloprotease FtsH 26105:28192 forward MW:75561	Regular	6620322	0.23	755608538	75	20	58	41.15	545704	442677	307477	0	8	Pass1	PepFrag1	None	14058049	IPAGVLLEGPPGTGK	IPAGVLLEGPPGTGK	224	15	7.00	4380	6	6	3	1	56714030	65746	Identified	2182	2.5	b5b6y4y10y13y14y15	240165	1343	147166956772518	107166956772518	0.0068	Green	9067	14057988	14058018	253320	3696	3696.00	2.00	2
20	NCDO2118_RS00110	ATP-dependent zinc metalloprotease FtsH 26105:28192 forward MW:75561	Regular	6620322	0.23	755608538	75	20	58	41.15	545704	442677	307477	0	9	Pass1	PepFrag1	None	39460305	NKPLASDVDLHNVATQTPGYVGADLENVLNEAALVAAR	NKPLASDVDLHNVATQTPGYVGADLENVLNEAALVAAR	378	38	4.20	4385	4	4	3	0	7607079	57021	Identified	742	3.1	b17y4y5y6y7y8y13*	462340	3680	288176246240716	104088123120358	0.0049	Yellow	40705	39460174	39460149	421664	2665	2665.00	4.00	4
20	NCDO2118_RS00110	ATP-dependent zinc metalloprotease FtsH 26105:28192 forward MW:75561	Regular	6620322	0.23	755608538	75	20	58	41.15	545704	442677	307477	0	10	Pass1	PepFrag1	None	15948475	NFQAYIIPTDSVVK	NFQAYIIPTDSVVK	99	14	6.78	4387	3	3	0	0	1023065	48308	Missing	122	1.7	b6y9y11	323999	1493	157930559037942	117930559037942	0.0025	Red	45424	15948397	15948420	491517	1391	1391.00	2.00	2
20	NCDO2118_RS00110	ATP-dependent zinc metalloprotease FtsH 26105:28192 forward MW:75561	Regular	6620322	0.23	755608538	75	20	58	41.15	545704	442677	307477	0	11	Pass1	PepFrag1	None	22279738	DANANVDDFSNINIYNGDEK	DANANVDDFSNINIYNGDEK	657	20	3.37	4382	2	2	0	0	3418203	53547		611	1.8	b9b10y4y6y9y10*y10	309653	1972	190121358094478	550606790472389	0.0021	Yellow	15419	22279601	22279621	285242	1129	1129.00	3.31	4
20	NCDO2118_RS00110	ATP-dependent zinc metalloprotease FtsH 26105:28192 forward MW:75561	Regular	6620322	0.23	755608538	75	20	58	41.15	545704	442677	307477	0	12	Pass1	PepFrag1	None	28194799	EREIVAYHEAGHAIVGLVLENGSTVR	EREIVAYHEAGHAIVGLVLENGSTVR	448	26	5.30	4383	0	0	0	0	3552122	53714		42	1.8	b15	316809	2632	230471320859712	113647547239808	0.0017	Yellow	30232	28194908	28194874	350352	948	948.00	3.00	3
20	NCDO2118_RS00110	ATP-dependent zinc metalloprotease FtsH 26105:28192 forward MW:75561	Regular	6620322	0.23	755608538	75	20	58	41.15	545704	442677	307477	0	13	Pass2	PepFrag2	None	13187253	QELVEVVDFLK	QELVEVVDFLK	202	11	3.83	4388	2	2	0	0	2015075	51252		540	1.9	b10*y7y9	345435	1256	140740598584399	100740598584399	0.0043	Red	6702	13187350	13187382	238843	2372	2372.00	2.00	2
20	NCDO2118_RS00110	ATP-dependent zinc metalloprotease FtsH 26105:28192 forward MW:75561	Regular	6620322	0.23	755608538	75	20	58	41.15	545704	442677	307477	0	14	Pass2	PepFrag2	None	10705551	ISYSQLMTK	ISYSQLMTK	43	9	9.72	4386	2	2	0	0	8596909	57552		514	1.6	b7y6*y8y8*y8	188196	1001	120980586572634	809805865726335	0.0033	Yellow	2210	10705616	10705652	196656	1786	1786.00	2.00	2
20	NCDO2118_RS00110	ATP-dependent zinc metalloprotease FtsH 26105:28192 forward MW:75561	Regular	6620322	0.23	755608538	75	20	58	41.15	545704	442677	307477	0	15	Pass2	PepFrag2	None	15767272	KEINAADIDEGMDR	KEINAADIDEGMDR	419	14	3.86	4398	0	0	0	0	4191535	54433		433	1.7	b2b3b8y10	371498	1424	15302637614116	11302637614116	0.0026	Yellow	28303	15766771	15766795	341927	1411	1411.00	2.00	2
20	NCDO2118_RS00110	ATP-dependent zinc metalloprotease FtsH 26105:28192 forward MW:75561	Regular	6620322	0.23	755608538	75	20	58	41.15	545704	442677	307477	0	16	Pass2	MissedCleavage	None	19359745	KLGMVSYEGDHQVFIGR	KLGMVSYEGDHQVFIGR	551	17	7.74	4394	4	4	1	0	4350684	54594		2855	3.7	b11y9y13y14y17	416382	1790	178235819866554	138235819866554	0.0186	Yellow	38276	19359919	19359923	392270	10144	10144.00	2.00	2
20	NCDO2118_RS00110	ATP-dependent zinc metalloprotease FtsH 26105:28192 forward MW:75561	Regular	6620322	0.23	755608538	75	20	58	41.15	545704	442677	307477	0	17	Pass2	MissedCleavage	None	24812395	FADVAGSEEEKQELVEVVDFLK	FADVAGSEEEKQELVEVVDFLK	191	22	3.74	4393	2	2	0	0	6185175	56122		303	1.8	b17b19y8y16	385211	2304	210902284486469	170902284486469	0.0020	Yellow	35410	24812203	24812162	376490	1093	1093.00	2.00	2
20	NCDO2118_RS00110	ATP-dependent zinc metalloprotease FtsH 26105:28192 forward MW:75561	Regular	6620322	0.23	755608538	75	20	58	41.15	545704	442677	307477	0	18	Pass2	VarMod	Phosphoryl STY(13)	14857712	IPAGVLLEGPPGTGK	IPAGVLLEGPPGTGK	224	15	7.00	4395	2	2	0	0	12421320	59150	Identified	11654	4.3	b15y11y14-H3PO4y15	240165	1343	147166956772518	107166956772518	0.0308	Green	11618	14857756	14857783	267239	16825	16825.00	2.00	2
20	NCDO2118_RS00110	ATP-dependent zinc metalloprotease FtsH 26105:28192 forward MW:75561	Regular	6620322	0.23	755608538	75	20	58	41.15	545704	442677	307477	0	19	Pass2	VarMod	Phosphoryl STY(2)	33196246	GTNNFPLLGNSSSEVKNFQAYIIPTDSVVK	GTNNFPLLGNSSSEVKNFQAYIIPTDSVVK	83	30	6.95	4396	3	3	0	0	7924355	57198	Identified	983	2.4	b21*b25*b30y5y7y11y13y30	383454	3011	25209649325287	128064328835247	0.0032	Yellow	40183	33196575	33196485	416396	1737	1737.00	3.00	3
20	NCDO2118_RS00110	ATP-dependent zinc metalloprotease FtsH 26105:28192 forward MW:75561	Regular	6620322	0.23	755608538	75	20	58	41.15	545704	442677	307477	0	20	Pass2	VarMod	Oxidation M(14)	17978622	ATHIARSMVTEYGMSK	ATHIARSMVTEYGMSK	535	16	9.72	4397	2	2	0	0	4696885	54927		113	1.8	b11b13y7	185856	1642	168270661771182	128270661771182	0.0026	Yellow	32456	17978628	17978641	361561	1422	1422.00	2.00	2
20	NCDO2118_RS00110	ATP-dependent zinc metalloprotease FtsH 26105:28192 forward MW:75561	Regular	6620322	0.23	755608538	75	20	58	41.15	545704	442677	307477	0	21	Pass2	InSource	None	6253378	MSLFK	QIMSLFK	628	5	10.10	4381	4	4	1	0	37579000	0.0000		487	0.0	b2b2b3b5y4y5	231916	591	851434586985685	130286917397137	0.0050	Green	11444	6253362	6253387	266687	2717	2717.00	1.00	1
20	NCDO2118_RS00110	ATP-dependent zinc metalloprotease FtsH 26105:28192 forward MW:75561	Regular	6620322	0.23	755608538	75	20	58	41.15	545704	442677	307477	0	22	Pass2	InSource	None	4942973	SLFK	QIMSLFK	629	4	10.10	4381	1	1	0	0	768216	0.0000		45	0.0	y4	231916	467	727731020852716	105546204170543	0.0017	Green	11439	4942939	4942961	266675	909	909.00	1.00	1
20	NCDO2118_RS00110	ATP-dependent zinc metalloprotease FtsH 26105:28192 forward MW:75561	Regular	521886	0.84	755608538	14	5	58	3.88	29463	29943	6010	1	1	Pass1	PepFrag1	None	14486322	EINAADIDEGMDR	EINAADIDEGMDR	420	13	3.43	414	10	10	8	2	23812090	50944		3474	3.8	b2b3b3*b3b4b4*b4b5*b6*b6y4y5y6y7y8y9y10y11	201765	1289	143195129239694	103195129239694	0.4636	Yellow	3964	14486230	14486250	201765	13658	13658.00	2.00	2
20	NCDO2118_RS00110	ATP-dependent zinc metalloprotease FtsH 26105:28192 forward MW:75561	Regular	521886	0.84	755608538	14	5	58	3.88	29463	29943	6010	0	2	Pass1	PepFrag1	None	15948475	NFQAYIIPTDSVVK	NFQAYIIPTDSVVK	99	14	6.78	415	0	0	0	0	2115208	40429	Missing	52	2.9	y12*	421578	1493	157930559037942	117930559037942	0.2140	Red	6396	15948495	15948508	421578	6304	6304.00	2.00	2
20	NCDO2118_RS00110	ATP-dependent zinc metalloprotease FtsH 26105:28192 forward MW:75561	Regular	521886	0.84	755608538	14	5	58	3.88	29463	29943	6010	0	3	Pass2	PepFrag2	None	11325013	SMVTEYGMSK	SMVTEYGMSK	541	10	6.89	418	3	3	0	0	899360	36715		2349	2.3	b7b10y1y10	137220	1025	12290669611554	829066961155399	0.1508	Red	2384	11324727	11324756	137220	4442	4442.00	2.00	2
20	NCDO2118_RS00110	ATP-dependent zinc metalloprotease FtsH 26105:28192 forward MW:75561	Regular	521886	0.84	755608538	14	5	58	3.88	29463	29943	6010	0	4	Pass2	PepFrag2	None	8554319	EAIETHR	EAIETHR	600	7	5.30	417	0	0	0	0	2078109	40352		55	1.9	b3	119195	768	101391243059154	613912430591538	0.1373	Red	1767	8554427	8554458	119195	4044	4044.00	2.00	2
20	NCDO2118_RS00110	ATP-dependent zinc metalloprotease FtsH 26105:28192 forward MW:75561	Regular	521886	0.84	755608538	14	5	58	3.88	29463	29943	6010	0	5	Pass2	MissedCleavage	None	43162270	NKPLASDVDLHNVATQTPGYVGADLENVLNEAALVAARQNK	NKPLASDVDLHNVATQTPGYVGADLENVLNEAALVAARQNK	378	41	4.62	416	1	1	0	0	573109	34758	Missing	80	2.2	b6	395788	4025	305916961721067	474048462060192	0.0344	Red	6001	43162564	43162564	395788	1015	1015.00	7.00	7
20	NCDO2118_RS00110	ATP-dependent zinc metalloprotease FtsH 26105:28192 forward MW:75561	Regular	1448287	1.4	755608538	41	10	58	10.79	69556	28149	24851	1	1	Pass1	PepFrag1	None	8975404	VLVGAPDVK	VLVGAPDVK	358	9	6.78	2187	9	9	5	1	85293560	60918	Identified	6027	3.3	b2b8y2y3y4y5y5y6y7y8y9	182021	870	110180769869336	701807698693355	0.2040	Green	3603	8975345	8975380	184555	14191	14191.00	1.81	2
20	NCDO2118_RS00110	ATP-dependent zinc metalloprotease FtsH 26105:28192 forward MW:75561	Regular	1448287	1.4	755608538	41	10	58	10.79	69556	28149	24851	0	2	Pass1	PepFrag1	None	11325013	SMVTEYGMSK	SMVTEYGMSK	541	10	6.89	2191	2	2	1	0	4720665	48349		268	3.2	y9y10	178319	1025	12290669611554	829066961155399	0.1654	Yellow	3876	11324983	11325015	187678	11508	11508.00	2.00	2
20	NCDO2118_RS00110	ATP-dependent zinc metalloprotease FtsH 26105:28192 forward MW:75561	Regular	1448287	1.4	755608538	41	10	58	10.79	69556	28149	24851	0	3	Pass1	PepFrag1	None	10915844	VRDLFENAK	VRDLFENAK	273	9	7.03	2190	2	2	0	0	2525722	45632		1204	1.8	b5b5y3y5*	154079	1010	12170466260244	817046626024404	0.0352	Red	9224	10915788	10915821	249530	2450	2450.00	2.00	2
20	NCDO2118_RS00110	ATP-dependent zinc metalloprotease FtsH 26105:28192 forward MW:75561	Regular	1448287	1.4	755608538	41	10	58	10.79	69556	28149	24851	0	4	Pass1	PepFrag1	None	22251006	IENVTMQPSDSLITVTGEYK	IENVTMQPSDSLITVTGEYK	57	20	3.83	2188	2	2	0	0	3041649	46440	Missing	243	1.7	b4b6b9y16*	293290	2064	195989480989022	906596539926812	0.0141	Red	11226	22251120	22251117	275965	980	980.00	3.00	3
20	NCDO2118_RS00110	ATP-dependent zinc metalloprotease FtsH 26105:28192 forward MW:75561	Regular	1448287	1.4	755608538	41	10	58	10.79	69556	28149	24851	0	5	Pass1	PepFrag1	None	30623861	TFEESLKDANANVDDFSNINIYNGDEK	TFEESLKDANANVDDFSNINIYNGDEK	650	27	3.63	2189	2	2	0	0	2166780	44967		105	1.9	b5b11*y8	325437	2750	237309302808562	118206201872375	0.0139	Red	14082	30623753	30623682	345680	970	970.00	3.00	3
20	NCDO2118_RS00110	ATP-dependent zinc metalloprotease FtsH 26105:28192 forward MW:75561	Regular	1448287	1.4	755608538	41	10	58	10.79	69556	28149	24851	0	6	Pass2	PepFrag2	None	8534302	TFEESLK	TFEESLK	650	7	4.26	2195	4	4	0	0	4143379	47782		7658	2.9	b3b7y5y7	165659	778	102269476338066	164538952676133	0.1760	Red	3947	8534062	8534078	188697	12243	12243.00	1.10	1
20	NCDO2118_RS00110	ATP-dependent zinc metalloprotease FtsH 26105:28192 forward MW:75561	Regular	1448287	1.4	755608538	41	10	58	10.79	69556	28149	24851	0	7	Pass2	PepFrag2	None	22279738	DANANVDDFSNINIYNGDEK	DANANVDDFSNINIYNGDEK	657	20	3.37	2196	1	1	0	0	1031964	41745		69	1.7	y10	278336	1972	190121358094478	150121358094478	0.0135	Red	11748	22280469	22280415	284236	942	942.00	2.00	2
20	NCDO2118_RS00110	ATP-dependent zinc metalloprotease FtsH 26105:28192 forward MW:75561	Regular	1448287	1.4	755608538	41	10	58	10.79	69556	28149	24851	0	8	Pass2	MissedCleavage	None	14367016	VRFADVAGSEEEK	VRFADVAGSEEEK	189	13	4.16	2192	2	2	0	0	3347815	46856		2708	2.5	y10y13	161049	1301	144082476723823	104082476723823	0.0629	Red	5113	14367106	14367126	202247	4374	4374.00	2.00	2
20	NCDO2118_RS00110	ATP-dependent zinc metalloprotease FtsH 26105:28192 forward MW:75561	Regular	1448287	1.4	755608538	41	10	58	10.79	69556	28149	24851	0	9	Pass2	VarMod	Phosphoryl STY(6)	12155769	ILGEAYDRAK	ILGEAYDRAK	590	10	6.95	2194	1	1	0	0	1614309	43688		191	1.9	y5y9	158942	1054	125214139930828	852141399308275	0.0400	Red	3645	12155824	12155853	185021	2785	2785.00	2.00	2
20	NCDO2118_RS00110	ATP-dependent zinc metalloprotease FtsH 26105:28192 forward MW:75561	Regular	1448287	1.4	755608538	41	10	58	10.79	69556	28149	24851	0	10	Pass2	VarMod	Oxidation M(*);Phosphoryl STY(*)	23210618	IENVTMQPSDSLITVTGEYK	IENVTMQPSDSLITVTGEYK	57	20	3.83	2193	2	2	0	0	1765135	44076	Identified	685	1.6	b7b11-H3PO4b14*b15y10	293290	2064	195989480989022	906596539926812	0.0119	Red	10501	23210610	23210601	265499	826	826.00	3.00	3
20	NCDO2118_RS00110	ATP-dependent zinc metalloprotease FtsH 26105:28192 forward MW:75561	Regular	1448287	1.4	755608538	41	10	58	10.79	69556	28149	24851	0	11	Pass2	InSource	None	6853879	VGAPDVK	VLVGAPDVK	360	7	6.78	2187	8	8	3	2	235252300	0.0000	Identified	4572	0.0	b3b5b6b7y2y4y5y6y7	182021	641	898803980730476	139760796146095	0.1897	Green	3611	6853886	6853906	184609	13193	13193.00	1.00	1
20	NCDO2118_RS00110	ATP-dependent zinc metalloprotease FtsH 26105:28192 forward MW:75561	Regular	1448287	1.4	755608538	41	10	58	10.79	69556	28149	24851	0	12	Pass2	InSource	None	5863195	GAPDVK	VLVGAPDVK	361	6	6.78	2187	6	6	3	0	103888100	0.0000	Identified	1121	0.0	b5b6y2y3y4y6	182021	536	797754924937232	119550984987446	0.0732	Green	3604	5863207	5863226	184569	5094	5094.00	1.00	1
20	NCDO2118_RS00110	ATP-dependent zinc metalloprotease FtsH 26105:28192 forward MW:75561	Regular	3311984	1.41	755608538	64	18	58	16.40	104724	44448	31787	1	1	Pass1	PepFrag1	None	8664804	QIMSLFK	QIMSLFK	626	7	10.10	6654	7	7	4	1	69414260	63615		7422	4.1	b2b4*b5b6b7y3y4y4y5y6y7	224141	829	106691377218832	173382754437665	0.3037	Green	13923	8664727	8664750	264348	31801	31801.00	1.52	1
20	NCDO2118_RS00110	ATP-dependent zinc metalloprotease FtsH 26105:28192 forward MW:75561	Regular	3311984	1.41	755608538	64	18	58	16.40	104724	44448	31787	0	2	Pass1	PepFrag1	None	14087907	SDVLDPALLRPGR	SDVLDPALLRPGR	341	13	6.95	6649	4	4	0	0	19917810	58193	Identified	5122	3.0	b3y8y11y12y13	218039	1323	145702229398225	105702229398225	0.0700	Yellow	9789	14087871	14087895	245019	7333	7333.00	2.12	2
20	NCDO2118_RS00110	ATP-dependent zinc metalloprotease FtsH 26105:28192 forward MW:75561	Regular	3311984	1.41	755608538	64	18	58	16.40	104724	44448	31787	0	3	Pass1	PepFrag1	None	14058049	IPAGVLLEGPPGTGK	IPAGVLLEGPPGTGK	224	15	7.00	6650	6	6	1	0	3544484	50696	Identified	2238	2.8	b7b8y2y3y4y5y10y15	236799	1343	147166956772518	107166956772518	0.0507	Red	11274	14058058	14058081	252985	5314	5314.00	2.00	2
20	NCDO2118_RS00110	ATP-dependent zinc metalloprotease FtsH 26105:28192 forward MW:75561	Regular	3311984	1.41	755608538	64	18	58	16.40	104724	44448	31787	0	4	Pass1	PepFrag1	None	39460305	NKPLASDVDLHNVATQTPGYVGADLENVLNEAALVAAR	NKPLASDVDLHNVATQTPGYVGADLENVLNEAALVAAR	378	38	4.20	6652	14	14	2	2	16169330	57288	Identified	4562	3.5	b4b7b7b8b9*b10b10*b13*b14*b14b17*b19b21*b29y4y5y7y8y9y10y12y13y13*y15*y16y17*y21y25y26*y28y30*y38*	472592	3680	288176246240716	104088123120358	0.0370	Yellow	46996	39460209	39460140	419481	3872	3872.00	3.90	4
20	NCDO2118_RS00110	ATP-dependent zinc metalloprotease FtsH 26105:28192 forward MW:75561	Regular	3311984	1.41	755608538	64	18	58	16.40	104724	44448	31787	0	5	Pass1	PepFrag1	None	35457226	IGGYMLALPDEEIMQPTNFHLQDQLASLMGGR	IGGYMLALPDEEIMQPTNFHLQDQLASLMGGR	483	32	4.06	6653	5	5	1	0	19004430	57989	Identified	2872	3.1	b7b8y13y17y32	445615	3292	267546650671313	138364433780876	0.0315	Yellow	47805	35457224	35457053	427198	3296	3296.00	3.31	3
20	NCDO2118_RS00110	ATP-dependent zinc metalloprotease FtsH 26105:28192 forward MW:75561	Regular	3311984	1.41	755608538	64	18	58	16.40	104724	44448	31787	0	6	Pass1	PepFrag1	None	10705551	ISYSQLMTK	ISYSQLMTK	43	9	9.72	6648	5	5	2	1	16402820	57350		1201	1.9	b2b4b6y3y6y6y7y8y8	181938	1001	120980586572634	809805865726335	0.0286	Yellow	2826	10705602	10705631	198347	2997	2997.00	2.00	2
20	NCDO2118_RS00110	ATP-dependent zinc metalloprotease FtsH 26105:28192 forward MW:75561	Regular	3311984	1.41	755608538	64	18	58	16.40	104724	44448	31787	0	7	Pass2	PepFrag2	None	15948475	NFQAYIIPTDSVVK	NFQAYIIPTDSVVK	99	14	6.78	6651	1	1	0	0	3248337	50317	Identified	92	2.9	y7	324782	1493	157930559037942	117930559037942	0.0617	Red	45481	15948508	15948525	403761	6457	6457.00	2.00	2
20	NCDO2118_RS00110	ATP-dependent zinc metalloprotease FtsH 26105:28192 forward MW:75561	Regular	3311984	1.41	755608538	64	18	58	16.40	104724	44448	31787	0	8	Pass2	PepFrag2	None	8364149	DLFENAK	DLFENAK	275	7	4.07	6665	1	1	0	0	376486	40958		3058	2.1	b3y7	154633	757	10042077156173	160841543123461	0.0465	Red	15832	8364059	8364082	271475	4869	4869.00	1.00	1
20	NCDO2118_RS00110	ATP-dependent zinc metalloprotease FtsH 26105:28192 forward MW:75561	Regular	3311984	1.41	755608538	64	18	58	16.40	104724	44448	31787	0	9	Pass2	PepFrag2	None	25001925	LGMVSYEGDHQVFIGRDYGQTK	LGMVSYEGDHQVFIGRDYGQTK	552	22	5.28	6662	4	4	1	0	2157743	48541		338	3.1	b2y4y5y15	253431	2277	209251375398959	995009169326396	0.0458	Red	34838	25002164	25002144	346850	4799	4799.00	3.00	3
20	NCDO2118_RS00110	ATP-dependent zinc metalloprotease FtsH 26105:28192 forward MW:75561	Regular	3311984	1.41	755608538	64	18	58	16.40	104724	44448	31787	0	10	Pass2	PepFrag2	None	15767272	KEINAADIDEGMDR	KEINAADIDEGMDR	419	14	3.86	6663	1	1	0	0	1642398	47356		210	1.9	b13y11	392100	1424	15302637614116	11302637614116	0.0177	Red	33330	15766675	15766692	341022	1854	1854.00	2.00	2
20	NCDO2118_RS00110	ATP-dependent zinc metalloprotease FtsH 26105:28192 forward MW:75561	Regular	3311984	1.41	755608538	64	18	58	16.40	104724	44448	31787	0	11	Pass2	PepFrag2	None	13187253	QELVEVVDFLK	QELVEVVDFLK	202	11	3.83	6664	1	1	0	0	1368372	46563		209	1.3	b9y6y10	342987	1256	140740598584399	100740598584399	0.0090	Red	40966	13187576	13187602	374814	943	943.00	2.00	2
20	NCDO2118_RS00110	ATP-dependent zinc metalloprotease FtsH 26105:28192 forward MW:75561	Regular	3311984	1.41	755608538	64	18	58	16.40	104724	44448	31787	0	12	Pass2	MissedCleavage	None	26954050	LGEEIVFGVATPGASNDIEKATHIAR	LGEEIVFGVATPGASNDIEKATHIAR	515	26	4.63	6656	4	4	0	0	3153084	50188	Missing	646	2.4	b2b5b10y13y19	308286	2517	223708135347424	109138756898283	0.0183	Red	20032	26953885	26953842	287504	1914	1914.00	3.00	3
20	NCDO2118_RS00110	ATP-dependent zinc metalloprotease FtsH 26105:28192 forward MW:75561	Regular	3311984	1.41	755608538	64	18	58	16.40	104724	44448	31787	0	13	Pass2	MissedCleavage	None	19321528	IPAGVLLEGPPGTGKTLLAK	IPAGVLLEGPPGTGKTLLAK	224	20	9.88	6655	2	2	0	0	3143762	50175	Identified	441	1.7	b3b9b13	301612	1886	184552851495267	144552851495267	0.0093	Red	29372	19321551	19321549	324721	976	976.00	2.26	2
20	NCDO2118_RS00110	ATP-dependent zinc metalloprotease FtsH 26105:28192 forward MW:75561	Regular	3311984	1.41	755608538	64	18	58	16.40	104724	44448	31787	0	14	Pass2	VarMod	Phosphoryl STY(3)	17668434	YETLDAKQIMSLFK	YETLDAKQIMSLFK	619	14	6.95	6661	6	6	2	1	5315745	52457		2591	4.2	b10b11b12*y2y3y8y11y12y13-H3PO4y14y14*	309785	1589	164629969982005	124629969982005	0.1621	Red	22883	17668293	17668301	298713	16978	16978.00	2.06	2
20	NCDO2118_RS00110	ATP-dependent zinc metalloprotease FtsH 26105:28192 forward MW:75561	Regular	3311984	1.41	755608538	64	18	58	16.40	104724	44448	31787	0	15	Pass2	VarMod	Oxidation M(6)	22410955	IENVTMQPSDSLITVTGEYK	IENVTMQPSDSLITVTGEYK	57	20	3.83	6657	0	0	0	0	1508185	46985	Identified	88	2.9	b5*b7*	319793	2064	195989480989022	155989480989022	0.0415	Red	54772	22410947	22410921	511929	4341	4341.00	2.48	2
20	NCDO2118_RS00110	ATP-dependent zinc metalloprotease FtsH 26105:28192 forward MW:75561	Regular	3311984	1.41	755608538	64	18	58	16.40	104724	44448	31787	0	16	Pass2	VarMod	Phosphoryl STY(20)	22981642	YHDLGARIPAGVLLEGPPGTGK	YHDLGARIPAGVLLEGPPGTGK	217	22	7.74	6660	2	2	0	0	5513098	52615	Identified	224	2.8	b2y7y14	256210	2080	197001042400332	157001042400332	0.0343	Red	24545	22981657	22981626	304831	3593	3593.00	2.14	2
20	NCDO2118_RS00110	ATP-dependent zinc metalloprotease FtsH 26105:28192 forward MW:75561	Regular	3311984	1.41	755608538	64	18	58	16.40	104724	44448	31787	0	17	Pass2	VarMod	Oxidation M(*)	35617175	IGGYMLALPDEEIMQPTNFHLQDQLASLMGGR	IGGYMLALPDEEIMQPTNFHLQDQLASLMGGR	483	32	4.06	6658	1	1	0	0	9851183	55136	Identified	346	2.6	y11y14y17	445615	3292	267546650671313	937733253356567	0.0191	Yellow	29763	35617474	35617433	326287	2004	2004.00	4.00	4
20	NCDO2118_RS00110	ATP-dependent zinc metalloprotease FtsH 26105:28192 forward MW:75561	Regular	3311984	1.41	755608538	64	18	58	16.40	104724	44448	31787	0	18	Pass2	VarMod	Phosphoryl STY(24)	28323373	LDGNKIENVTMQPSDSLITVTGEYK	LDGNKIENVTMQPSDSLITVTGEYK	52	25	4.06	6659	0	0	0	0	3506447	50650	Identified	127	2.1	b12*b23*	304686	2558	2261309432483	110753962165533	0.0132	Red	49701	28323251	28323191	446749	1383	1383.00	3.00	3
20	NCDO2118_RS00110	ATP-dependent zinc metalloprotease FtsH 26105:28192 forward MW:75561	Regular	3046261	1.44	755608538	52	21	58	30.79	143996	100933	70490	1	1	Pass1	PepFrag1	None	8534302	TFEESLK	TFEESLK	650	7	4.26	4288	3	3	1	0	2219313	48300		54225	5.8	b7y6y7	161864	778	102269476338066	164538952676133	0.5878	Red	9579	8534236	8534255	274108	84640	84640.00	1.03	1
20	NCDO2118_RS00110	ATP-dependent zinc metalloprotease FtsH 26105:28192 forward MW:75561	Regular	3046261	1.44	755608538	52	21	58	30.79	143996	100933	70490	0	2	Pass1	PepFrag1	None	8285189	AIAEALLK	AIAEALLK	611	8	7.00	4276	8	8	5	3	90970860	64427		2065	2.7	b4b5b6y2y3y4y5y8	235122	817	105659286072213	171318572144426	0.0602	Green	2513	8285167	8285186	211763	8666	8666.00	1.37	1
20	NCDO2118_RS00110	ATP-dependent zinc metalloprotease FtsH 26105:28192 forward MW:75561	Regular	3046261	1.44	755608538	52	21	58	30.79	143996	100933	70490	0	3	Pass1	PepFrag1	None	17169167	TAPSIIFIDEIDAVGR	TAPSIIFIDEIDAVGR	283	16	3.70	4279	9	9	1	2	26817830	59122	Missing	5378	3.3	b3b5b7b9b10b12y5y7y8y9y11y13	387337	1613	166283521182289	126283521182289	0.0530	Green	29344	17169142	17169149	375758	7627	7627.00	2.05	2
20	NCDO2118_RS00110	ATP-dependent zinc metalloprotease FtsH 26105:28192 forward MW:75561	Regular	3046261	1.44	755608538	52	21	58	30.79	143996	100933	70490	0	4	Pass1	PepFrag1	None	26624311	EIVAYHEAGHAIVGLVLENGSTVRK	EIVAYHEAGHAIVGLVLENGSTVRK	450	25	6.04	4285	0	0	0	0	1598123	46874		65	3.2	b22	326144	2510	22329317476201	716465873810051	0.0311	Red	10993	26624236	26624245	282986	4483	4483.00	4.00	4
20	NCDO2118_RS00110	ATP-dependent zinc metalloprotease FtsH 26105:28192 forward MW:75561	Regular	3046261	1.44	755608538	52	21	58	30.79	143996	100933	70490	0	5	Pass1	PepFrag1	None	14087907	SDVLDPALLRPGR	SDVLDPALLRPGR	341	13	6.95	4277	2	2	1	0	11612260	55487	Identified	420	2.2	b7y8y9	228178	1323	145702229398225	105702229398225	0.0206	Yellow	6114	14087970	14087990	248943	2960	2960.00	2.39	2
20	NCDO2118_RS00110	ATP-dependent zinc metalloprotease FtsH 26105:28192 forward MW:75561	Regular	3046261	1.44	755608538	52	21	58	30.79	143996	100933	70490	0	6	Pass1	PepFrag1	None	29064029	AVAGEAGVPFYSISGSDFVEMFVGVGASR	AVAGEAGVPFYSISGSDFVEMFVGVGASR	244	29	3.83	4283	1	1	0	0	3861920	50706	Missing	88	2.7	b11y4	434442	2666	232451880680401	114967920453601	0.0174	Red	35447	29064128	29064073	434775	2505	2505.00	2.56	3
20	NCDO2118_RS00110	ATP-dependent zinc metalloprotease FtsH 26105:28192 forward MW:75561	Regular	3046261	1.44	755608538	52	21	58	30.79	143996	100933	70490	0	7	Pass1	PepFrag1	None	15948475	NFQAYIIPTDSVVK	NFQAYIIPTDSVVK	99	14	6.78	4282	0	0	0	0	2821424	49342	Identified	180	2.0	b8*b10*y7y12*	324934	1493	157930559037942	117930559037942	0.0147	Red	38257	15948383	15948396	476063	2122	2122.00	2.00	2
20	NCDO2118_RS00110	ATP-dependent zinc metalloprotease FtsH 26105:28192 forward MW:75561	Regular	3046261	1.44	755608538	52	21	58	30.79	143996	100933	70490	0	8	Pass1	PepFrag1	None	39460305	NKPLASDVDLHNVATQTPGYVGADLENVLNEAALVAAR	NKPLASDVDLHNVATQTPGYVGADLENVLNEAALVAAR	378	38	4.20	4284	4	4	0	0	3275441	49990	Missing	209	2.6	b13b26y3y11	486262	3680	288176246240716	104088123120358	0.0119	Red	34398	39460330	39460255	422221	1718	1718.00	4.00	4
20	NCDO2118_RS00110	ATP-dependent zinc metalloprotease FtsH 26105:28192 forward MW:75561	Regular	3046261	1.44	755608538	52	21	58	30.79	143996	100933	70490	0	9	Pass1	PepFrag1	None	30623861	TFEESLKDANANVDDFSNINIYNGDEK	TFEESLKDANANVDDFSNINIYNGDEK	650	27	3.63	4278	0	0	0	0	2790522	49295		251	2.3	b6y19y22	337947	2750	237309302808562	118206201872375	0.0119	Red	17920	30623893	30623818	317292	1712	1712.00	3.00	3
20	NCDO2118_RS00110	ATP-dependent zinc metalloprotease FtsH 26105:28192 forward MW:75561	Regular	3046261	1.44	755608538	52	21	58	30.79	143996	100933	70490	0	10	Pass1	PepFrag1	None	31905685	EQTLNQLLVEMDGFQDDGNSVIVIAATNR	EQTLNQLLVEMDGFQDDGNSVIVIAATNR	312	29	3.43	4280	4	4	0	0	3837417	50678		947	1.8	b5b7b8b10b15y1y9*y14y21*	438070	2952	248792453491589	125861635661059	0.0053	Red	34290	31905748	31905656	420931	756	756.00	3.00	3
20	NCDO2118_RS00110	ATP-dependent zinc metalloprotease FtsH 26105:28192 forward MW:75561	Regular	3046261	1.44	755608538	52	21	58	30.79	143996	100933	70490	0	11	Pass2	PepFrag2	None	8664804	QIMSLFK	QIMSLFK	626	7	10.10	4287	1	1	0	0	1917997	47666		469	2.2	b4y5	239397	829	106691377218832	666913772188325	0.0406	Red	8828	8664700	8664729	269305	5840	5840.00	2.00	2
20	NCDO2118_RS00110	ATP-dependent zinc metalloprotease FtsH 26105:28192 forward MW:75561	Regular	3046261	1.44	755608538	52	21	58	30.79	143996	100933	70490	0	12	Pass2	PepFrag2	None	16997843	TYSEATAVMIDDEVR	TYSEATAVMIDDEVR	574	15	3.59	4286	3	3	1	1	8749480	54257		595	2.5	b3b7b8y4y7y11y13	298234	1540	161227869348147	121227869348147	0.0260	Yellow	18914	16997997	16998004	321335	3738	3738.00	2.14	2
20	NCDO2118_RS00110	ATP-dependent zinc metalloprotease FtsH 26105:28192 forward MW:75561	Regular	3046261	1.44	755608538	52	21	58	30.79	143996	100933	70490	0	13	Pass2	PepFrag2	None	16638286	GTNNFPLLGNSSSEVK	GTNNFPLLGNSSSEVK	83	16	7.00	4281	5	5	0	0	2706266	49161	Identified	1125	2.1	b10b10*b13b14b16y8y11y12	255723	1518	159688686462042	119688686462042	0.0148	Red	30666	16638147	16638156	383877	2124	2124.00	2.00	2
20	NCDO2118_RS00110	ATP-dependent zinc metalloprotease FtsH 26105:28192 forward MW:75561	Regular	3046261	1.44	755608538	52	21	58	30.79	143996	100933	70490	0	14	Pass2	PepFrag2	None	26783593	IENVTMQPSDSLITVTGEYKEPVK	IENVTMQPSDSLITVTGEYKEPVK	57	24	4.16	4295	3	3	1	0	1931671	47697	Missing	1645	2.3	b12b16*b17y8y9	307477	2503	222877828243123	714389141215617	0.0128	Red	10840	26783729	26783737	282085	1843	1843.00	4.00	4
20	NCDO2118_RS00110	ATP-dependent zinc metalloprotease FtsH 26105:28192 forward MW:75561	Regular	3046261	1.44	755608538	52	21	58	30.79	143996	100933	70490	0	15	Pass2	PepFrag2	None	34347961	IQSMREREIVAYHEAGHAIVGLVLENGSTVR	IQSMREREIVAYHEAGHAIVGLVLENGSTVR	443	31	6.05	4296	1	1	0	0	1836499	47478		65	1.9	b12b13	329087	3215	263358264970309	135572176646873	0.0060	Red	25392	34347242	34347114	354213	859	859.00	3.00	3
20	NCDO2118_RS00110	ATP-dependent zinc metalloprotease FtsH 26105:28192 forward MW:75561	Regular	3046261	1.44	755608538	52	21	58	30.79	143996	100933	70490	0	16	Pass2	MissedCleavage	None	15978254	ISYSQLMTKLDGNK	ISYSQLMTKLDGNK	43	14	9.63	4289	0	0	0	0	1403504	46310		38	2.2	y7	205014	1495	158071568477359	653810456515728	0.0203	Red	11573	15978209	15978251	286406	2925	2925.00	3.00	3
20	NCDO2118_RS00110	ATP-dependent zinc metalloprotease FtsH 26105:28192 forward MW:75561	Regular	3046261	1.44	755608538	52	21	58	30.79	143996	100933	70490	0	17	Pass2	MissedCleavage	None	9595057	KYHDLGAR	KYHDLGAR	216	8	9.72	4291	0	0	0	0	911394	44435		40	1.5	y6	214694	872	110349564655678	703495646556783	0.0123	Red	9737	9594990	9595018	275118	1777	1777.00	2.00	2
20	NCDO2118_RS00110	ATP-dependent zinc metalloprotease FtsH 26105:28192 forward MW:75561	Regular	3046261	1.44	755608538	52	21	58	30.79	143996	100933	70490	0	18	Pass2	MissedCleavage	None	26954050	LGEEIVFGVATPGASNDIEKATHIAR	LGEEIVFGVATPGASNDIEKATHIAR	515	26	4.63	4292	2	2	0	0	3768950	50600	Missing	246	1.9	b7b13y8y21	315411	2517	223708135347424	718540676737121	0.0071	Red	13376	26953770	26953777	296392	1021	1021.00	4.00	4
20	NCDO2118_RS00110	ATP-dependent zinc metalloprotease FtsH 26105:28192 forward MW:75561	Regular	3046261	1.44	755608538	52	21	58	30.79	143996	100933	70490	0	19	Pass2	MissedCleavage	None	18909920	VKGTNNFPLLGNSSSEVK	VKGTNNFPLLGNSSSEVK	81	18	9.88	4290	0	0	0	0	3736722	50563	Missing	39	1.5	y8	295312	1758	176105214097747	136105214097747	0.0053	Red	15896	18909952	18909948	308913	758	758.00	2.00	2
20	NCDO2118_RS00110	ATP-dependent zinc metalloprotease FtsH 26105:28192 forward MW:75561	Regular	3046261	1.44	755608538	52	21	58	30.79	143996	100933	70490	0	20	Pass2	VarMod	Oxidation M(4)	34507910	IQSMREREIVAYHEAGHAIVGLVLENGSTVR	IQSMREREIVAYHEAGHAIVGLVLENGSTVR	443	31	6.05	4293	4	4	0	0	2601877	48991		2011	3.1	b4b5b7b11*b13b17y6*y8y9*y12y13y29	329087	3215	263358264970309	135572176646873	0.0228	Red	27627	34508237	34508107	366146	3286	3286.00	3.19	3
20	NCDO2118_RS00110	ATP-dependent zinc metalloprotease FtsH 26105:28192 forward MW:75561	Regular	3046261	1.44	755608538	52	21	58	30.79	143996	100933	70490	0	21	Pass2	VarMod	Phosphoryl STY(5)	27423974	EIVAYHEAGHAIVGLVLENGSTVRK	EIVAYHEAGHAIVGLVLENGSTVRK	450	25	6.04	4294	2	2	0	0	3462164	50231		389	2.6	b9b12b13b24*	326144	2510	22329317476201	18329317476201	0.0183	Red	28907	27424031	27423947	373647	2636	2636.00	2.00	2
20	NCDO2118_RS00110	ATP-dependent zinc metalloprotease FtsH 26105:28192 forward MW:75561	Regular	371546	1.8	755608538	11	4	58	3.88	11529	10441.5	2735	1	1	Pass1	PepFrag1	None	14486322	EINAADIDEGMDR	EINAADIDEGMDR	420	13	3.43	658	6	6	3	0	15921700	47720		1137	2.8	b3b4*b4b6*y5y6y7y8y11y13	234583	1289	143195129239694	103195129239694	0.5360	Red	3306	14486233	14486248	201659	6180	6180.00	2.00	2
20	NCDO2118_RS00110	ATP-dependent zinc metalloprotease FtsH 26105:28192 forward MW:75561	Regular	371546	1.8	755608538	11	4	58	3.88	11529	10441.5	2735	0	2	Pass1	PepFrag1	None	15948475	NFQAYIIPTDSVVK	NFQAYIIPTDSVVK	99	14	6.78	659	1	1	0	0	2178709	39082	Missing	36	1.4	b9	313957	1493	157930559037942	117930559037942	0.0677	Red	6513	15948400	15948408	425317	781	781.00	2.00	2
20	NCDO2118_RS00110	ATP-dependent zinc metalloprotease FtsH 26105:28192 forward MW:75561	Regular	371546	1.8	755608538	11	4	58	3.88	11529	10441.5	2735	0	3	Pass2	PepFrag2	None	11325013	SMVTEYGMSK	SMVTEYGMSK	541	10	6.89	661	4	4	1	0	691844	34100		1530	2.1	b1b9b10y10	236658	1025	12290669611554	829066961155399	0.3300	Red	1911	11324710	11324737	136691	3805	3805.00	2.00	2
20	NCDO2118_RS00110	ATP-dependent zinc metalloprotease FtsH 26105:28192 forward MW:75561	Regular	371546	1.8	755608538	11	4	58	3.88	11529	10441.5	2735	0	4	Pass2	PepFrag2	None	10474953	TDSKPEENK	TDSKPEENK	677	9	4.44	660	0	0	0	0	1535796	37563	Missing	32	1.1	y7*	36282	931	115272599814041	752725998140409	0.0662	Red	2209	10474826	10474854	148737	763	763.00	2.00	2
20	NCDO2118_RS00110	ATP-dependent zinc metalloprotease FtsH 26105:28192 forward MW:75561	Regular	2131076	1.88	755608538	28	12	58	4.17	62564	33228	16165	1	1	Pass1	PepFrag1	None	8975404	VLVGAPDVK	VLVGAPDVK	358	9	6.78	2982	9	9	5	2	138249400	64693	Identified	11402	4.2	b2b5y2y3y4y5y5y6y7y8y9	180566	870	110180769869336	701807698693355	0.4138	Green	5174	8975407	8975439	183512	25891	25891.00	1.69	2
20	NCDO2118_RS00110	ATP-dependent zinc metalloprotease FtsH 26105:28192 forward MW:75561	Regular	2131076	1.88	755608538	28	12	58	4.17	62564	33228	16165	0	2	Pass1	PepFrag1	None	8364149	DLFENAK	DLFENAK	275	7	4.07	2984	1	1	0	0	4390396	49711		446	2.2	y6*y7	169678	757	10042077156173	160841543123461	0.0927	Red	2164	8364147	8364164	153693	5799	5799.00	1.08	1
20	NCDO2118_RS00110	ATP-dependent zinc metalloprotease FtsH 26105:28192 forward MW:75561	Regular	2131076	1.88	755608538	28	12	58	4.17	62564	33228	16165	0	3	Pass1	PepFrag1	None	11224997	GGGGGGNPMSFGK	GGGGGGNPMSFGK	164	13	10.10	2981	2	2	0	0	5809840	50928	Identified	193	1.7	b5y4y6y10	154366	989	120011766568736	800117665687363	0.0246	Yellow	3338	11225027	11225058	166327	1538	1538.00	2.00	2
20	NCDO2118_RS00110	ATP-dependent zinc metalloprotease FtsH 26105:28192 forward MW:75561	Regular	2131076	1.88	755608538	28	12	58	4.17	62564	33228	16165	0	4	Pass2	PepFrag2	None	14486322	EINAADIDEGMDR	EINAADIDEGMDR	420	13	3.43	2992	0	0	0	0	1533466	45143		40	2.6	y3	216224	1289	143195129239694	103195129239694	0.0826	Red	9367	14486801	14486824	218125	5166	5166.00	2.00	2
20	NCDO2118_RS00110	ATP-dependent zinc metalloprotease FtsH 26105:28192 forward MW:75561	Regular	2131076	1.88	755608538	28	12	58	4.17	62564	33228	16165	0	5	Pass2	PepFrag2	None	5593450	EAVLK	EAVLK	369	5	7.00	2990	2	2	0	1	3298169	48469		145	1.3	b3y2	119382	540	801718934734121	120343786946824	0.0291	Red	4935	5593356	5593374	181545	1819	1819.00	1.00	1
20	NCDO2118_RS00110	ATP-dependent zinc metalloprotease FtsH 26105:28192 forward MW:75561	Regular	2131076	1.88	755608538	28	12	58	4.17	62564	33228	16165	0	6	Pass2	PepFrag2	None	11325013	SMVTEYGMSK	SMVTEYGMSK	541	10	6.89	2991	1	1	0	0	1535446	45148		85	1.6	y9y9	176840	1025	12290669611554	829066961155399	0.0268	Red	9072	11325179	11325210	215132	1678	1678.00	2.00	2
20	NCDO2118_RS00110	ATP-dependent zinc metalloprotease FtsH 26105:28192 forward MW:75561	Regular	2131076	1.88	755608538	28	12	58	4.17	62564	33228	16165	0	7	Pass2	PepFrag2	None	16638286	GTNNFPLLGNSSSEVK	GTNNFPLLGNSSSEVK	83	16	7.00	2983	0	0	0	0	2589230	47418	Identified	596	1.6	y6y11*	246059	1518	159688686462042	664591243080279	0.0174	Red	9078	16638120	16638152	215193	1087	1087.00	3.00	3
20	NCDO2118_RS00110	ATP-dependent zinc metalloprotease FtsH 26105:28192 forward MW:75561	Regular	2131076	1.88	755608538	28	12	58	4.17	62564	33228	16165	0	8	Pass2	PepFrag2	None	30623861	TFEESLKDANANVDDFSNINIYNGDEK	TFEESLKDANANVDDFSNINIYNGDEK	650	27	3.63	2986	1	1	0	0	1315511	44477		70	1.8	y8y10*	306293	2750	237309302808562	118206201872375	0.0146	Red	12441	30623764	30623686	246261	915	915.00	3.00	3
20	NCDO2118_RS00110	ATP-dependent zinc metalloprotease FtsH 26105:28192 forward MW:75561	Regular	2131076	1.88	755608538	28	12	58	4.17	62564	33228	16165	0	9	Pass2	PepFrag2	None	10915844	VRDLFENAK	VRDLFENAK	273	9	7.03	2985	1	1	0	0	207362	36453		76	1.2	y2y6*	176404	1010	12170466260244	817046626024404	0.0133	Red	12748	10915718	10915750	248553	829	829.00	2.00	2
20	NCDO2118_RS00110	ATP-dependent zinc metalloprotease FtsH 26105:28192 forward MW:75561	Regular	2131076	1.88	755608538	28	12	58	4.17	62564	33228	16165	0	10	Pass2	MissedCleavage	None	10925796	RILGEAYDR	RILGEAYDR	589	9	6.97	2987	1	1	0	0	770781	42155		37	1.5	y4	177222	1000	120.9	80.9	0.0265	Red	3453	10925708	10925739	167482	1660	1660.00	2.00	2
20	NCDO2118_RS00110	ATP-dependent zinc metalloprotease FtsH 26105:28192 forward MW:75561	Regular	2131076	1.88	755608538	28	12	58	4.17	62564	33228	16165	0	11	Pass2	VarMod	Oxidation M(7)	10865500	ISYSQLMTK	ISYSQLMTK	43	9	9.72	2988	2	2	0	0	3425895	48634		227	1.9	y4y7	183225	1001	120980586572634	809805865726335	0.0484	Red	7994	10865416	10865448	207199	3028	3028.00	2.00	2
20	NCDO2118_RS00110	ATP-dependent zinc metalloprotease FtsH 26105:28192 forward MW:75561	Regular	2131076	1.88	755608538	28	12	58	4.17	62564	33228	16165	0	12	Pass2	VarMod	Phosphoryl STY(21);Phosphoryl STY(22)	26942688	EIVAYHEAGHAIVGLVLENGSTVR	EIVAYHEAGHAIVGLVLENGSTVR	450	24	5.23	2989	2	2	0	0	2269839	46846		331	1.8	b10y10y12y12y19-2(H3PO4)	303012	2375	215213103422813	676065517114064	0.0163	Red	15015	26942847	26942847	272211	1017	1017.00	3.59	4
20	NCDO2118_RS00110	ATP-dependent zinc metalloprotease FtsH 26105:28192 forward MW:75561	Regular	2131076	1.88	755608538	28	12	58	4.17	62564	33228	16165	0	13	Pass2	InSource	None	5863195	GAPDVK	VLVGAPDVK	361	6	6.78	2982	6	6	4	0	170285100	0.0000	Identified	2517	0.0	b5y2y3y4y4y5y6	180566	536	797754924937232	119550984987446	0.1940	Green	5179	5863197	5863215	183552	12137	12137.00	1.00	1
20	NCDO2118_RS00110	ATP-dependent zinc metalloprotease FtsH 26105:28192 forward MW:75561	Regular	2862363	2.35	755608538	31	11	58	10.07	62268	14081	5626	1	1	Pass1	PepFrag1	None	5453657	TLLAK	TLLAK	239	5	10.10	2087	6	6	3	2	308022900	69453		1203	2.0	b2b3y1y2y3y5	135330	543	804685521509633	120937104301927	0.0945	Green	1740	5453651	5453667	133855	5887	5887.00	1.00	1
20	NCDO2118_RS00110	ATP-dependent zinc metalloprotease FtsH 26105:28192 forward MW:75561	Regular	2862363	2.35	755608538	31	11	58	10.07	62268	14081	5626	0	2	Pass1	PepFrag1	None	9364785	ILGEAYDR	ILGEAYDR	590	8	4.07	2090	2	2	0	0	5289106	51801		123	2.2	b5b7	158359	852	108655745869932	686557458699324	0.0860	Yellow	4588	9364739	9364764	168732	5352	5352.00	1.68	2
20	NCDO2118_RS00110	ATP-dependent zinc metalloprotease FtsH 26105:28192 forward MW:75561	Regular	2862363	2.35	755608538	31	11	58	10.07	62268	14081	5626	0	3	Pass1	PepFrag1	None	8364149	DLFENAK	DLFENAK	275	7	4.07	2088	1	1	0	0	7847870	53515		64	1.7	y5	166887	757	10042077156173	604207715617304	0.0456	Yellow	3281	8364135	8364161	155725	2842	2842.00	2.00	2
20	NCDO2118_RS00110	ATP-dependent zinc metalloprotease FtsH 26105:28192 forward MW:75561	Regular	2862363	2.35	755608538	31	11	58	10.07	62268	14081	5626	0	4	Pass1	PepFrag1	None	18558855	TYSEATAVMIDDEVRR	TYSEATAVMIDDEVRR	574	16	4.06	2089	1	1	0	0	3793671	50358		209	1.9	b2b4y6	245482	1688	171398860006321	742659066708809	0.0280	Yellow	12368	18558860	18558871	241344	1744	1744.00	3.00	3
20	NCDO2118_RS00110	ATP-dependent zinc metalloprotease FtsH 26105:28192 forward MW:75561	Regular	2862363	2.35	755608538	31	11	58	10.07	62268	14081	5626	0	5	Pass1	PepFrag1	None	22251006	IENVTMQPSDSLITVTGEYK	IENVTMQPSDSLITVTGEYK	57	20	3.83	2086	3	3	0	1	3225325	49653	Missing	154	1.7	b5b13y7	292504	2064	195989480989022	906596539926812	0.0168	Red	16811	22250849	22250839	301363	1049	1049.00	3.00	3
20	NCDO2118_RS00110	ATP-dependent zinc metalloprotease FtsH 26105:28192 forward MW:75561	Regular	2862363	2.35	755608538	31	11	58	10.07	62268	14081	5626	0	6	Pass2	PepFrag2	None	14546832	MPDEAAAAEVPEPK	MPDEAAAAEVPEPK	636	14	3.69	2095	6	6	0	2	14096220	56058	Identified	1111	2.4	b6b10y4y8y10y14	191804	1320	145481885709551	105481885709551	0.0586	Yellow	6359	14546561	14546568	185529	3650	3650.00	2.00	2
20	NCDO2118_RS00110	ATP-dependent zinc metalloprotease FtsH 26105:28192 forward MW:75561	Regular	2862363	2.35	755608538	31	11	58	10.07	62268	14081	5626	0	7	Pass2	PepFrag2	None	23352292	NFQAYIIPTDSVVKDIQNAAK	NFQAYIIPTDSVVKDIQNAAK	99	21	6.84	2096	0	0	0	0	1401291	46033	Missing	47	2.8	b11*	299194	2187	20370052870765	958003524717666	0.0574	Red	17714	23351335	23351318	321431	3573	3573.00	2.77	3
20	NCDO2118_RS00110	ATP-dependent zinc metalloprotease FtsH 26105:28192 forward MW:75561	Regular	2862363	2.35	755608538	31	11	58	10.07	62268	14081	5626	0	8	Pass2	MissedCleavage	None	17818673	ATHIARSMVTEYGMSK	ATHIARSMVTEYGMSK	535	16	9.72	2091	2	2	0	0	3152231	49553		113	3.4	b5b9	192699	1642	168270661771182	721804411807879	0.1349	Red	9815	17818721	17818735	215877	8403	8403.00	3.00	3
20	NCDO2118_RS00110	ATP-dependent zinc metalloprotease FtsH 26105:28192 forward MW:75561	Regular	2862363	2.35	755608538	31	11	58	10.07	62268	14081	5626	0	9	Pass2	VarMod	Oxidation M(6)	22410955	IENVTMQPSDSLITVTGEYK	IENVTMQPSDSLITVTGEYK	57	20	3.83	2092	7	7	2	0	4727549	51314	Missing	2357	5.6	b3b3*b6*b8*b9b10b11b20y6y19y20	292504	2064	195989480989022	906596539926812	0.4250	Yellow	15612	22411041	22411030	279979	26461	26461.00	2.95	3
20	NCDO2118_RS00110	ATP-dependent zinc metalloprotease FtsH 26105:28192 forward MW:75561	Regular	2862363	2.35	755608538	31	11	58	10.07	62268	14081	5626	0	10	Pass2	VarMod	Phosphoryl STY(*)	17668434	YETLDAKQIMSLFK	YETLDAKQIMSLFK	619	14	6.95	2094	1	1	0	0	1419255	46088		153	2.1	b8*b10b11y10	296550	1589	164629969982005	124629969982005	0.0394	Red	8466	17668496	17668483	203213	2456	2456.00	2.00	2
20	NCDO2118_RS00110	ATP-dependent zinc metalloprotease FtsH 26105:28192 forward MW:75561	Regular	2862363	2.35	755608538	31	11	58	10.07	62268	14081	5626	0	11	Pass2	VarMod	Phosphoryl STY(13)	14857712	IPAGVLLEGPPGTGK	IPAGVLLEGPPGTGK	224	15	7.00	2093	2	2	0	0	1745426	46986	Missing	92	1.4	b13y12	244267	1343	147166956772518	107166956772518	0.0137	Red	6688	14857673	14857679	188495	851	851.00	2.00	2
20	NCDO2118_RS00110	ATP-dependent zinc metalloprotease FtsH 26105:28192 forward MW:75561	Regular	1408437	2.72	755608538	34	6	58	6.47	60689	18677	19608	1	1	Pass1	PepFrag1	None	8975404	VLVGAPDVK	VLVGAPDVK	358	9	6.78	2918	9	9	5	2	90772320	61067	Identified	6313	3.4	b2b7y2y3y4y5y6y7y8y9	182623	870	110180769869336	701807698693355	0.2550	Green	4358	8975415	8975444	184192	15477	15477.00	1.78	2
20	NCDO2118_RS00110	ATP-dependent zinc metalloprotease FtsH 26105:28192 forward MW:75561	Regular	1408437	2.72	755608538	34	6	58	6.47	60689	18677	19608	0	2	Pass1	PepFrag1	None	30623861	TFEESLKDANANVDDFSNINIYNGDEK	TFEESLKDANANVDDFSNINIYNGDEK	650	27	3.63	2920	0	0	0	0	2564496	45577		45	2.6	b11*	316714	2750	237309302808562	118206201872375	0.0384	Red	15682	30623978	30623906	345988	2331	2331.00	3.00	3
20	NCDO2118_RS00110	ATP-dependent zinc metalloprotease FtsH 26105:28192 forward MW:75561	Regular	1408437	2.72	755608538	34	6	58	6.47	60689	18677	19608	0	3	Pass1	PepFrag1	None	10915844	VRDLFENAK	VRDLFENAK	273	9	7.03	2919	1	1	0	0	1950410	44389		42	1.2	y3	169048	1010	12170466260244	817046626024404	0.0143	Red	10603	10915862	10915891	249154	869	869.00	2.00	2
20	NCDO2118_RS00110	ATP-dependent zinc metalloprotease FtsH 26105:28192 forward MW:75561	Regular	1408437	2.72	755608538	34	6	58	6.47	60689	18677	19608	0	4	Pass2	PepFrag2	None	8534302	TFEESLK	TFEESLK	650	7	4.26	2922	5	5	1	1	5774802	49103		6585	2.8	b2b3b7y5y7	160993	778	102269476338066	164538952676133	0.1881	Red	4726	8534058	8534077	188060	11414	11414.00	1.12	1
20	NCDO2118_RS00110	ATP-dependent zinc metalloprotease FtsH 26105:28192 forward MW:75561	Regular	1408437	2.72	755608538	34	6	58	6.47	60689	18677	19608	0	5	Pass2	PepFrag2	None	11224997	GGGGGGNPMSFGK	GGGGGGNPMSFGK	164	13	10.10	2923	3	3	0	0	2668801	45751	Missing	461	2.6	b13y5y13	155706	989	120011766568736	800117665687363	0.0785	Red	1589	11225217	11225245	148233	4766	4766.00	2.00	2
20	NCDO2118_RS00110	ATP-dependent zinc metalloprotease FtsH 26105:28192 forward MW:75561	Regular	1408437	2.72	755608538	34	6	58	6.47	60689	18677	19608	0	6	Pass2	VarMod	Phosphoryl STY(*)	19358518	TYSEATAVMIDDEVRR	TYSEATAVMIDDEVRR	574	16	4.06	2921	2	2	0	0	1900863	44277		120	2.0	y5y7y7	243141	1688	171398860006321	742659066708809	0.0302	Red	6023	19358491	19358508	201362	1835	1835.00	3.00	3
20	NCDO2118_RS00110	ATP-dependent zinc metalloprotease FtsH 26105:28192 forward MW:75561	Regular	1408437	2.72	755608538	34	6	58	6.47	60689	18677	19608	0	7	Pass2	InSource	None	6853879	VGAPDVK	VLVGAPDVK	360	7	6.78	2918	8	8	4	2	335996800	0.0000	Identified	4497	0.0	b3b5b6y2y4y5y5y6y7	182623	641	898803980730476	139760796146095	0.2386	Green	4359	6853866	6853887	184193	14480	14480.00	1.00	1
20	NCDO2118_RS00110	ATP-dependent zinc metalloprotease FtsH 26105:28192 forward MW:75561	Regular	1408437	2.72	755608538	34	6	58	6.47	60689	18677	19608	0	8	Pass2	InSource	None	5863195	GAPDVK	VLVGAPDVK	361	6	6.78	2918	3	3	0	0	38455160	0.0000	Identified	992	0.0	y2y4y6	182623	536	797754924937232	119550984987446	0.1005	Green	4355	5863193	5863214	184184	6099	6099.00	1.00	1
20	NCDO2118_RS00110	ATP-dependent zinc metalloprotease FtsH 26105:28192 forward MW:75561	Regular	1408437	2.72	755608538	34	6	58	6.47	60689	18677	19608	0	9	Pass2	InSource	None	7984720	LVGAPDVK	VLVGAPDVK	359	8	6.78	2918	3	3	0	0	22852640	0.0000	Identified	553	0.0	b7y4y8	182623	765	101127031163723	162254062327446	0.0326	Green	4351	7984716	7984735	184156	1978	1978.00	1.00	1
20	NCDO2118_RS00110	ATP-dependent zinc metalloprotease FtsH 26105:28192 forward MW:75561	Regular	1408437	2.72	755608538	34	6	58	6.47	60689	18677	19608	0	10	Pass2	InSource	None	9024690	IDDEVRR	TYSEATAVMIDDEVRR	583	7	4.31	2921	0	0	0	0	333165	0.0000		0	0.0		243141	816	105573051186756	655730511867559	0.0237	Red	6041	9024633	9024663	201607	1440	1440.00	2.00	2
20	NCDO2118_RS00110	ATP-dependent zinc metalloprotease FtsH 26105:28192 forward MW:75561	Regular	418359	3.92	755608538	15	7	58	9.93	44921	5294	13413	1	1	Pass1	PepFrag1	None	26783593	IENVTMQPSDSLITVTGEYKEPVK	IENVTMQPSDSLITVTGEYKEPVK	57	24	4.16	1092	1	1	0	0	1626194	38327	Missing	74	2.4	b13	310790	2503	222877828243123	108585218828749	0.0484	Red	9912	26783468	26783439	480217	2173	2173.00	3.00	3
20	NCDO2118_RS00110	ATP-dependent zinc metalloprotease FtsH 26105:28192 forward MW:75561	Regular	418359	3.92	755608538	15	7	58	9.93	44921	5294	13413	0	2	Pass1	PepFrag1	None	35457226	IGGYMLALPDEEIMQPTNFHLQDQLASLMGGR	IGGYMLALPDEEIMQPTNFHLQDQLASLMGGR	483	32	4.06	1091	1	1	0	0	988522	36165	Missing	326	2.4	y8y11y11	450022	3292	267546650671313	138364433780876	0.0362	Red	8345	35457491	35457393	383983	1626	1626.00	3.21	3
20	NCDO2118_RS00110	ATP-dependent zinc metalloprotease FtsH 26105:28192 forward MW:75561	Regular	418359	3.92	755608538	15	7	58	9.93	44921	5294	13413	0	3	Pass1	PepFrag1	None	14486322	EINAADIDEGMDR	EINAADIDEGMDR	420	13	3.43	1090	4	4	2	0	10301280	46344		336	1.7	y6y8y9y10	218517	1289	143195129239694	103195129239694	0.0333	Red	4664	14486248	14486252	202364	1495	1495.00	2.00	2
20	NCDO2118_RS00110	ATP-dependent zinc metalloprotease FtsH 26105:28192 forward MW:75561	Regular	418359	3.92	755608538	15	7	58	9.93	44921	5294	13413	0	4	Pass2	PepFrag2	None	8534302	TFEESLK	TFEESLK	650	7	4.26	1095	1	1	0	0	534739	33497		3145	2.5	b6y7	173365	778	102269476338066	164538952676133	0.1895	Red	4112	8533956	8533970	184448	8512	8512.00	1.00	1
20	NCDO2118_RS00110	ATP-dependent zinc metalloprotease FtsH 26105:28192 forward MW:75561	Regular	418359	3.92	755608538	15	7	58	9.93	44921	5294	13413	0	5	Pass2	PepFrag2	None	8364149	DLFENAK	DLFENAK	275	7	4.07	1094	2	2	0	0	11066410	46656		1641	2.3	y5y7	172544	757	10042077156173	160841543123461	0.1408	Red	1913	8363824	8363840	133387	6325	6325.00	1.00	1
20	NCDO2118_RS00110	ATP-dependent zinc metalloprotease FtsH 26105:28192 forward MW:75561	Regular	418359	3.92	755608538	15	7	58	9.93	44921	5294	13413	0	6	Pass2	PepFrag2	None	14087907	SDVLDPALLRPGR	SDVLDPALLRPGR	341	13	6.95	1096	1	1	0	0	382556	32042	Missing	43	1.3	b3	232293	1323	145702229398225	105702229398225	0.0169	Red	2821	14087517	14087523	156317	758	758.00	2.00	2
20	NCDO2118_RS00110	ATP-dependent zinc metalloprotease FtsH 26105:28192 forward MW:75561	Regular	418359	3.92	755608538	15	7	58	9.93	44921	5294	13413	0	7	Pass2	MissedCleavage	None	13026648	DIQNAAKSNDVK	DIQNAAKSNDVK	113	12	6.89	1093	3	3	0	1	1370235	37583		7725	4.3	b8y4y12	88838	1194	136070041963757	960700419637568	0.4636	Red	2681	13026534	13026544	154223	20825	20825.00	2.00	2
20	NCDO2118_RS00110	ATP-dependent zinc metalloprotease FtsH 26105:28192 forward MW:75561	Regular	418359	3.92	755608538	15	7	58	9.93	44921	5294	13413	0	8	Pass2	InSource	None	4752511	NDVK	DIQNAAKSNDVK	121	4	6.78	1093	2	2	0	0	558225	0.0000		123	0.0	b3y4	88838	427	685559075126308	971118150252615	0.0714	Red	2671	4752485	4752508	153970	3207	3207.00	1.00	1
23	NCDO2118_RS00165	PTS mannitol transporter subunit IIA 33127:33558 forward MW:15909	Regular	3123347	1.56	160234890	10	4	15	11.19	45013	65022	4611	1	1	Pass1	PepFrag1	None	5172980	EIQK	EIQK	1	4	7.00	218	5	5	2	1	100963400	64988		4284	0.0	b3b3b4y1y3y4	223390	482	74323187392592	108646374785184	0.9451	Green	3412	5172961	5172981	223390	42543	42543.00	1.00	1
23	NCDO2118_RS00165	PTS mannitol transporter subunit IIA 33127:33558 forward MW:15909	Regular	3123347	1.56	160234890	10	4	15	11.19	45013	65022	4611	0	2	Pass1	PepFrag1	None	12716842	LADAQAIEEIAK	LADAQAIEEIAK	127	12	3.83	217	4	4	1	0	2847369	49491		204	1.3	b3y6y7y10	238817	1198	136373769893458	963737698934584	0.0179	Yellow	4004	12716779	12716807	238817	805	805.00	2.00	2
23	NCDO2118_RS00165	PTS mannitol transporter subunit IIA 33127:33558 forward MW:15909	Regular	3123347	1.56	160234890	10	4	15	11.19	45013	65022	4611	0	3	Pass2	PepFrag2	Carbamidomethyl C(5)	14797512	ISIFCADVDNVVK	ISIFCADVDNVVK	114	13	3.88	219	1	1	0	0	662827	43160		68	1.4	y9	289644	1337	146728306718363	106728306718363	0.0186	Red	5394	14797643	14797660	289644	835	835.00	2.00	2
23	NCDO2118_RS00165	PTS mannitol transporter subunit IIA 33127:33558 forward MW:15909	Regular	3123347	1.56	160234890	10	4	15	11.19	45013	65022	4611	0	4	Pass2	MissedCleavage	None	18249014	LADAQAIEEIAKYFEN	LADAQAIEEIAKYFEN	127	16	3.69	220	0	0	0	0	738181	43628		55	1.5	b9*	253496	1679	170789079681194	130789079681194	0.0184	Red	4406	18248843	18248829	253496	830	830.00	2.00	2
23	NCDO2118_RS00165	PTS mannitol transporter subunit IIA 33127:33558 forward MW:15909	Regular	1187502	2.81	160234890	6	4	15	23.08	34483	4590	1584	1	1	Pass1	PepFrag1	None	22080641	ELSVYMGNFIAIPHGTDESK	ELSVYMGNFIAIPHGTDESK	47	20	4.42	3044	2	2	0	0	1544306	42634	Missing	930	2.2	b5y9y14y20	312701	2027	193640175088559	153640175088559	0.0625	Red	7144	22080544	22080502	239172	2154	2154.00	2.36	2
23	NCDO2118_RS00165	PTS mannitol transporter subunit IIA 33127:33558 forward MW:15909	Regular	1187502	2.81	160234890	6	4	15	23.08	34483	4590	1584	0	2	Pass1	PepFrag1	Carbamidomethyl C(5)	14797512	ISIFCADVDNVVK	ISIFCADVDNVVK	114	13	3.88	3045	1	1	0	0	2001315	43760		48	1.4	b7	293676	1337	146728306718363	106728306718363	0.0263	Red	14126	14797414	14797429	326647	906	906.00	2.00	2
23	NCDO2118_RS00165	PTS mannitol transporter subunit IIA 33127:33558 forward MW:15909	Regular	1187502	2.81	160234890	6	4	15	23.08	34483	4590	1584	0	3	Pass2	PepFrag2	None	11615899	GVNFGTVENPK	GVNFGTVENPK	82	11	7.00	3046	3	3	1	1	2904076	45376	Identified	303	4.7	b6b7b9*y4	177535	1060	125688886194619	856888861946188	0.8538	Red	7197	11616041	11616067	239698	29443	29443.00	2.00	2
23	NCDO2118_RS00165	PTS mannitol transporter subunit IIA 33127:33558 forward MW:15909	Regular	1187502	2.81	160234890	6	4	15	23.08	34483	4590	1584	0	4	Pass2	PepFrag2	Carbamidomethyl C(2)	26052789	YCGSLLVDGGYVKPNYISAMIER	YCGSLLVDGGYVKPNYISAMIER	22	23	6.56	3043	0	0	0	0	3520207	46212	Missing	303	2.3	b22y16*	339617	2365	214608571735848	103072381157232	0.0574	Red	13834	26053049	26053021	321567	1980	1980.00	2.67	3
23	NCDO2118_RS00165	PTS mannitol transporter subunit IIA 33127:33558 forward MW:15909	Regular	1476732	3.26	160234890	7	6	15	31.47	19244	9932	3863	1	1	Pass1	PepFrag1	None	12716842	LADAQAIEEIAK	LADAQAIEEIAK	127	12	3.83	3479	4	4	1	0	6522292	49837		794	2.7	y7y9y11y12	212980	1198	136373769893458	963737698934584	0.3063	Yellow	11650	12716784	12716813	237736	5895	5895.00	2.00	2
23	NCDO2118_RS00165	PTS mannitol transporter subunit IIA 33127:33558 forward MW:15909	Regular	1476732	3.26	160234890	7	6	15	31.47	19244	9932	3863	0	2	Pass1	PepFrag1	Carbamidomethyl C(5)	14797512	ISIFCADVDNVVK	ISIFCADVDNVVK	114	13	3.88	3481	0	0	0	0	1722197	44054		41	2.1	b5	264248	1337	146728306718363	578188711455754	0.1388	Red	12964	14797502	14797539	250305	2671	2671.00	3.00	3
23	NCDO2118_RS00165	PTS mannitol transporter subunit IIA 33127:33558 forward MW:15909	Regular	1476732	3.26	160234890	7	6	15	31.47	19244	9932	3863	0	3	Pass1	PepFrag1	None	22080641	ELSVYMGNFIAIPHGTDESK	ELSVYMGNFIAIPHGTDESK	47	20	4.42	3480	0	0	0	0	3621372	47282	Identified	161	1.9	y8y15	301301	2027	193640175088559	890934500590396	0.0710	Red	14684	22080766	22080770	268371	1366	1366.00	3.00	3
23	NCDO2118_RS00165	PTS mannitol transporter subunit IIA 33127:33558 forward MW:15909	Regular	1476732	3.26	160234890	7	6	15	31.47	19244	9932	3863	0	4	Pass2	PepFrag2	None	24791922	DRELSVYMGNFIAIPHGTDESK	DRELSVYMGNFIAIPHGTDESK	45	22	4.54	3484	0	0	0	0	1731330	44077	Missing	37	1.6	b5	308860	2266	208576914150883	990512761005888	0.0422	Red	17091	24791230	24791213	300309	813	813.00	3.00	3
23	NCDO2118_RS00165	PTS mannitol transporter subunit IIA 33127:33558 forward MW:15909	Regular	1476732	3.26	160234890	7	6	15	31.47	19244	9932	3863	0	5	Pass2	MissedCleavage	None	18249014	LADAQAIEEIAKYFEN	LADAQAIEEIAKYFEN	127	16	3.69	3482	0	0	0	0	1108361	42140		70	1.9	b9	289274	1679	170789079681194	130789079681194	0.0921	Red	13445	18249075	18249079	255334	1772	1772.00	2.00	2
23	NCDO2118_RS00165	PTS mannitol transporter subunit IIA 33127:33558 forward MW:15909	Regular	1476732	3.26	160234890	7	6	15	31.47	19244	9932	3863	0	6	Pass2	VarMod	Oxidation M(8)	24951871	DRELSVYMGNFIAIPHGTDESK	DRELSVYMGNFIAIPHGTDESK	45	22	4.54	3483	3	3	1	0	2609148	45858	Missing	2760	3.5	y7y18y20*y21y22	308860	2266	208576914150883	990512761005888	0.3496	Red	19768	24951974	24951955	365092	6727	6727.00	2.73	3
28	NCDO2118_RS00195	acetyltransferase 38155:38676 forward MW:19369	Regular	8233492	0	193690373	18	5	19	30.64	36618	33694	7037	1	1	Pass1	PepFrag1	None	16619585	GLVLAPLDVLTTHQGK	GLVLAPLDVLTTHQGK	78	16	7.82	3831	7	7	3	0	27025670	63474	Identified	2582	4.4	b3b4y2y3y6y10y11	316340	1603	165595545103273	703970300688488	0.4753	Green	28937	16619492	16619521	337466	17403	17403.00	3.00	3
28	NCDO2118_RS00195	acetyltransferase 38155:38676 forward MW:19369	Regular	8233492	0	193690373	18	5	19	30.64	36618	33694	7037	0	2	Pass1	PepFrag1	None	21691267	ILDYPFISILGHETYYPK	ILDYPFISILGHETYYPK	109	18	5.22	3833	6	6	2	1	27703490	63581	Identified	2384	4.2	b3b6b6b7b17y2y14y15	373982	2025	193512780230782	890085201538546	0.3745	Green	39252	21691219	21691227	384285	13712	13712.00	2.96	3
28	NCDO2118_RS00195	acetyltransferase 38155:38676 forward MW:19369	Regular	8233492	0	193690373	18	5	19	30.64	36618	33694	7037	0	3	Pass1	PepFrag1	None	14007209	FGYVPASQYQIK	FGYVPASQYQIK	127	12	9.52	3834	2	2	0	0	40748980	65257	Identified	405	2.0	b3y8	219788	1287	143046970786289	103046970786289	0.0704	Green	5927	14007254	14007270	229511	2579	2579.00	2.00	2
28	NCDO2118_RS00195	acetyltransferase 38155:38676 forward MW:19369	Regular	8233492	0	193690373	18	5	19	30.64	36618	33694	7037	0	4	Pass1	PepFrag1	None	8594884	EVTELIR	EVTELIR	12	7	4.26	3832	1	1	0	0	618991	47073		952	1.4	b6y7	181102	812	105227758728806	170455517457613	0.0502	Red	18880	8594899	8594919	296636	1839	1839.00	1.00	1
28	NCDO2118_RS00195	acetyltransferase 38155:38676 forward MW:19369	Regular	8233492	0	193690373	18	5	19	30.64	36618	33694	7037	0	5	Pass2	VarMod	Phosphoryl STY(*);Phosphoryl STY(*)	19949235	TINLENYKEVTELIR	TINLENYKEVTELIR	4	15	4.56	3835	2	2	0	0	1517549	50967		714	1.6	b8-H3PO4y9y12y12y13	289800	1730	174230307433588	134230307433588	0.0296	Red	44606	19949291	19949277	432091	1085	1085.00	2.00	2
28	NCDO2118_RS00195	acetyltransferase 38155:38676 forward MW:19369	Regular	13113590	0	193690373	26	6	19	50.29	42909	24965	9557	1	1	Pass1	PepFrag1	None	21691267	ILDYPFISILGHETYYPK	ILDYPFISILGHETYYPK	109	18	5.22	825	6	6	2	1	26948160	65483	Identified	1816	3.8	b2b8y2y12y13y14y16	381890	2025	193512780230782	890085201538546	0.2415	Green	20005	21691210	21691221	386906	10362	10362.00	3.00	3
28	NCDO2118_RS00195	acetyltransferase 38155:38676 forward MW:19369	Regular	13113590	0	193690373	26	6	19	50.29	42909	24965	9557	0	2	Pass1	PepFrag1	None	19100229	IVGHGLLSEVEIVSDSQK	IVGHGLLSEVEIVSDSQK	58	18	4.42	826	0	0	0	0	1524263	53008		32	3.5	y11*	288407	1802	179031517139171	793543447594475	0.1884	Yellow	22592	19100082	19100101	412786	8085	8085.00	3.00	3
28	NCDO2118_RS00195	acetyltransferase 38155:38676 forward MW:19369	Regular	13113590	0	193690373	26	6	19	50.29	42909	24965	9557	0	3	Pass1	PepFrag1	None	16619585	GLVLAPLDVLTTHQGK	GLVLAPLDVLTTHQGK	78	16	7.82	824	11	11	8	0	106976900	71470	Identified	1800	3.1	b3y2y4y5y6y7y8y9y10y11y12	316024	1603	165595545103273	703970300688488	0.1519	Green	14495	16619550	16619576	341558	6518	6518.00	3.00	3
28	NCDO2118_RS00195	acetyltransferase 38155:38676 forward MW:19369	Regular	13113590	0	193690373	26	6	19	50.29	42909	24965	9557	0	4	Pass2	PepFrag2	None	18349909	TINLENYKEVTELIR	TINLENYKEVTELIR	4	15	4.56	829	2	2	0	0	761958	49997		3668	3.9	b6b8*b11*y15	291745	1730	174230307433588	134230307433588	0.2964	Red	15455	18349762	18349765	349057	12718	12718.00	2.00	2
28	NCDO2118_RS00195	acetyltransferase 38155:38676 forward MW:19369	Regular	13113590	0	193690373	26	6	19	50.29	42909	24965	9557	0	5	Pass2	PepFrag2	None	25362276	APFEVPDENFMIKELTDGGLEGK	APFEVPDENFMIKELTDGGLEGK	139	23	3.82	828	5	5	0	0	1438653	52757	Identified	1534	2.3	b4b5b10b12b14b18*y4y6y6y7y8y9y9	388792	2339	213032786839762	665163934198812	0.0458	Yellow	8557	25361600	25361600	296778	1964	1964.00	4.00	4
28	NCDO2118_RS00195	acetyltransferase 38155:38676 forward MW:19369	Regular	13113590	0	193690373	26	6	19	50.29	42909	24965	9557	0	6	Pass2	MissedCleavage	None	29184433	FGYVPASQYQIKAPFEVPDENFMIK	FGYVPASQYQIKAPFEVPDENFMIK	127	25	4.44	827	2	2	0	0	2285420	54767	Missing	707	2.8	b7b8b21b22*y13*y16y22	391471	2697	23425035901353	11616690600902	0.0760	Yellow	17380	29184329	29184297	364513	3262	3262.00	2.80	3
28	NCDO2118_RS00195	acetyltransferase 38155:38676 forward MW:19369	Regular	10784270	0	193690373	20	4	19	34.10	54817	21634.5	3727	1	1	Pass1	PepFrag1	None	21691267	ILDYPFISILGHETYYPK	ILDYPFISILGHETYYPK	109	18	5.22	649	7	7	2	1	35587000	65841	Identified	1466	3.5	b2b3b7y2y3y14y16	387076	2025	193512780230782	890085201538546	0.1519	Green	15630	21691240	21691255	387481	8325	8325.00	3.00	3
28	NCDO2118_RS00195	acetyltransferase 38155:38676 forward MW:19369	Regular	10784270	0	193690373	20	4	19	34.10	54817	21634.5	3727	0	2	Pass1	PepFrag1	None	16619585	GLVLAPLDVLTTHQGK	GLVLAPLDVLTTHQGK	78	16	7.82	648	11	11	6	2	76158130	69145	Identified	1874	3.0	b2b3b5b9y4y6y7y8y9y10*y11y11y12y13	310876	1603	165595545103273	703970300688488	0.1112	Green	11387	16619512	16619556	342263	6098	6098.00	2.79	3
28	NCDO2118_RS00195	acetyltransferase 38155:38676 forward MW:19369	Regular	10784270	0	193690373	20	4	19	34.10	54817	21634.5	3727	0	3	Pass2	PepFrag2	None	18349909	TINLENYKEVTELIR	TINLENYKEVTELIR	4	15	4.56	650	1	1	0	0	438849	46751		216	5.8	b1b7b12*y11*	300994	1730	174230307433588	761535382890588	0.7217	Red	9754	18349701	18349737	325912	39562	39562.00	2.98	3
28	NCDO2118_RS00195	acetyltransferase 38155:38676 forward MW:19369	Regular	10784270	0	193690373	20	4	19	34.10	54817	21634.5	3727	0	4	Pass2	MissedCleavage	None	29184433	FGYVPASQYQIKAPFEVPDENFMIK	FGYVPASQYQIKAPFEVPDENFMIK	127	25	4.44	651	1	1	0	0	2653491	54566	Identified	171	1.7	b13b20	392578	2697	23425035901353	11616690600902	0.0152	Yellow	12025	29184469	29184404	349120	832	832.00	3.00	3
28	NCDO2118_RS00195	acetyltransferase 38155:38676 forward MW:19369	Regular	23982180	0	193690373	34	7	19	56.07	68885	61513	18704	1	1	Pass1	PepFrag1	None	16619585	GLVLAPLDVLTTHQGK	GLVLAPLDVLTTHQGK	78	16	7.82	2518	12	12	7	2	91500210	73413	Identified	6826	5.8	b2b3b5y3y5y5y6y7y8y9y10y11y11y12y13	304056	1603	165595545103273	703970300688488	0.5312	Green	31547	16619483	16619523	333237	36595	36595.00	3.00	3
28	NCDO2118_RS00195	acetyltransferase 38155:38676 forward MW:19369	Regular	23982180	0	193690373	34	7	19	56.07	68885	61513	18704	0	2	Pass1	PepFrag1	None	21691267	ILDYPFISILGHETYYPK	ILDYPFISILGHETYYPK	109	18	5.22	2519	12	12	5	1	137068800	75168	Identified	7342	4.7	b2b3b18y2y3y7y10y11y12y14y15y17	373283	2025	193512780230782	890085201538546	0.2677	Green	41809	21691255	21691265	379313	18438	18438.00	3.02	3
28	NCDO2118_RS00195	acetyltransferase 38155:38676 forward MW:19369	Regular	23982180	0	193690373	34	7	19	56.07	68885	61513	18704	0	3	Pass1	PepFrag1	None	12127198	GIGAAVLLELEK	GIGAAVLLELEK	94	12	4.26	2521	3	3	1	0	7749437	62692		567	2.8	b5b6y5y10	345384	1184	135309234100625	953092341006245	0.0941	Green	12366	12127188	12127216	257835	6480	6480.00	2.00	2
28	NCDO2118_RS00195	acetyltransferase 38155:38676 forward MW:19369	Regular	23982180	0	193690373	34	7	19	56.07	68885	61513	18704	0	4	Pass1	PepFrag1	None	18349909	TINLENYKEVTELIR	TINLENYKEVTELIR	4	15	4.56	2520	0	0	0	0	4117193	59945		485	1.5	b10b13y5y11y12	286748	1730	174230307433588	134230307433588	0.0139	Green	49457	18349769	18349773	444331	958	958.00	2.00	2
28	NCDO2118_RS00195	acetyltransferase 38155:38676 forward MW:19369	Regular	23982180	0	193690373	34	7	19	56.07	68885	61513	18704	0	5	Pass2	PepFrag2	None	14007209	FGYVPASQYQIK	FGYVPASQYQIK	127	12	9.52	2522	0	0	0	0	5243682	60995	Identified	32	1.6	y8	221597	1287	143046970786289	103046970786289	0.0210	Green	53634	14007237	14007260	495964	1445	1445.00	2.00	2
28	NCDO2118_RS00195	acetyltransferase 38155:38676 forward MW:19369	Regular	23982180	0	193690373	34	7	19	56.07	68885	61513	18704	0	6	Pass2	MissedCleavage	None	14798240	MIIKTINLENYK	MIIKTINLENYK	0	12	9.63	2523	3	3	0	0	5894875	61504		2014	1.3	b3b10y4y6y6y8*y9*y9	244871	1425	153098009320626	113098009320626	0.0109	Green	13953	14798236	14798257	264506	754	754.00	2.32	2
28	NCDO2118_RS00195	acetyltransferase 38155:38676 forward MW:19369	Regular	23982180	0	193690373	34	7	19	56.07	68885	61513	18704	0	7	Pass2	VarMod	Phosphoryl STY(8)	22651526	IVGHGLLSEVEIVSDSQKFK	IVGHGLLSEVEIVSDSQKFK	58	20	5.35	2524	4	4	0	0	4847894	60654		1438	2.9	b8b8-H3PO4b11-H3PO4b13b13y5*y6y6y7y11y18y18*y18-H3PO4y20	296169	2072	196495587165785	156495587165785	0.0612	Green	46417	22651656	22651628	414616	4215	4215.00	2.28	2
28	NCDO2118_RS00195	acetyltransferase 38155:38676 forward MW:19369	Regular	4678946	0	193690373	6	1	19	5.78	8522	25566	2227	1	1	Pass1	PepFrag1	None	10185051	ELTDGGLEGK	ELTDGGLEGK	152	10	3.83	954	6	6	3	0	80945760	65783		2227	2.9	b6y2y3y3y6y7y8y10	151752	929	115107452787569	751074527875687	10000	Yellow	3639	10185019	10185037	153506	8522	8522.00	1.92	2
28	NCDO2118_RS00195	acetyltransferase 38155:38676 forward MW:19369	Regular	10389330	0	193690373	29	7	19	50.87	57389	25318	7519	1	1	Pass1	PepFrag1	None	21691267	ILDYPFISILGHETYYPK	ILDYPFISILGHETYYPK	109	18	5.22	2500	5	5	1	0	33092900	65363	Identified	2210	4.2	b2b3y8y11y14y17	384205	2025	193512780230782	890085201538546	0.2338	Green	30936	21691216	21691231	385778	13418	13418.00	2.98	3
28	NCDO2118_RS00195	acetyltransferase 38155:38676 forward MW:19369	Regular	10389330	0	193690373	29	7	19	50.87	57389	25318	7519	0	2	Pass1	PepFrag1	None	16619585	GLVLAPLDVLTTHQGK	GLVLAPLDVLTTHQGK	78	16	7.82	2498	10	10	6	0	60924960	68014	Identified	1754	3.5	b3y1y3y6y7y8y8y9y10y11y12	318389	1603	165595545103273	703970300688488	0.1558	Green	22273	16619524	16619564	337530	8941	8941.00	2.94	3
28	NCDO2118_RS00195	acetyltransferase 38155:38676 forward MW:19369	Regular	10389330	0	193690373	29	7	19	50.87	57389	25318	7519	0	3	Pass1	PepFrag1	None	12356154	DLEIVAFEDGK	DLEIVAFEDGK	47	11	3.59	2503	3	3	0	0	5866180	57849		358	2.0	b8b11y5y9y11	283284	1138	131781508793591	917815087935915	0.0516	Yellow	12359	12356114	12356139	290769	2959	2959.00	1.84	2
28	NCDO2118_RS00195	acetyltransferase 38155:38676 forward MW:19369	Regular	10389330	0	193690373	29	7	19	50.87	57389	25318	7519	0	4	Pass1	PepFrag1	None	8594884	EVTELIR	EVTELIR	12	7	4.26	2501	1	1	0	0	417114	46368		445	1.6	b6y7	185379	812	105227758728806	170455517457613	0.0419	Red	11387	8594897	8594915	285279	2403	2403.00	1.00	1
28	NCDO2118_RS00195	acetyltransferase 38155:38676 forward MW:19369	Regular	10389330	0	193690373	29	7	19	50.87	57389	25318	7519	0	5	Pass1	PepFrag1	None	20690073	NEEGYIKDLEIVAFEDGK	NEEGYIKDLEIVAFEDGK	40	18	3.82	2499	4	4	1	0	6145944	58052		855	1.8	b9b11b12b13*y8	348873	1900	185465030305411	145465030305411	0.0227	Yellow	25005	20689978	20689961	352089	1305	1305.00	2.00	2
28	NCDO2118_RS00195	acetyltransferase 38155:38676 forward MW:19369	Regular	10389330	0	193690373	29	7	19	50.87	57389	25318	7519	0	6	Pass2	PepFrag2	None	18349909	TINLENYKEVTELIR	TINLENYKEVTELIR	4	15	4.56	2502	0	0	0	0	3253854	55290		87	4.9	b10*	299340	1730	174230307433588	761535382890588	0.4217	Yellow	19358	18349713	18349746	323349	24201	24201.00	3.00	3
28	NCDO2118_RS00195	acetyltransferase 38155:38676 forward MW:19369	Regular	10389330	0	193690373	29	7	19	50.87	57389	25318	7519	0	7	Pass2	MissedCleavage	None	22230564	ELTDGGLEGKSGVIHYSEAFN	ELTDGGLEGKSGVIHYSEAFN	152	21	4.16	2504	6	6	0	1	11453160	60755		1810	2.9	b4b11b13b19b20y8y11y21y21*	307718	2018	193066567527917	153066567527917	0.0725	Green	9705	22230531	22230502	274905	4162	4162.00	2.20	2
28	NCDO2118_RS00195	acetyltransferase 38155:38676 forward MW:19369	Regular	10829870	0.29	193690373	21	7	19	34.10	48290	40365	10829	1	1	Pass1	PepFrag1	None	21691267	ILDYPFISILGHETYYPK	ILDYPFISILGHETYYPK	109	18	5.22	3503	6	6	0	2	34459460	65719	Identified	2879	4.4	b2b4b6b6b14y2y14y16	372079	2025	193512780230782	890085201538546	0.3196	Green	36449	21691267	21691284	382650	15432	15432.00	2.96	3
28	NCDO2118_RS00195	acetyltransferase 38155:38676 forward MW:19369	Regular	10829870	0.29	193690373	21	7	19	34.10	48290	40365	10829	0	2	Pass1	PepFrag1	None	12356154	DLEIVAFEDGK	DLEIVAFEDGK	47	11	3.59	3498	2	2	0	0	5579628	57812		366	1.9	b8b10y4y6	297222	1138	131781508793591	917815087935915	0.0522	Yellow	15828	12356049	12356083	287004	2520	2520.00	1.79	2
28	NCDO2118_RS00195	acetyltransferase 38155:38676 forward MW:19369	Regular	10829870	0.29	193690373	21	7	19	34.10	48290	40365	10829	0	3	Pass1	PepFrag1	None	8594884	EVTELIR	EVTELIR	12	7	4.26	3499	1	1	0	0	2916525	54995		801	1.3	b5y7	185866	812	105227758728806	170455517457613	0.0259	Yellow	17887	8594824	8594849	296147	1250	1250.00	1.00	1
28	NCDO2118_RS00195	acetyltransferase 38155:38676 forward MW:19369	Regular	10829870	0.29	193690373	21	7	19	34.10	48290	40365	10829	0	4	Pass2	PepFrag2	None	16619585	GLVLAPLDVLTTHQGK	GLVLAPLDVLTTHQGK	78	16	7.82	3502	11	11	7	2	67255410	68624	Identified	6220	4.9	b3b5y3y4y4*y6*y7y8y9y10y10*y11y12y13	306259	1603	165595545103273	703970300688488	0.4641	Green	27091	16619373	16619411	335240	22413	22413.00	2.75	3
28	NCDO2118_RS00195	acetyltransferase 38155:38676 forward MW:19369	Regular	10829870	0.29	193690373	21	7	19	34.10	48290	40365	10829	0	5	Pass2	PepFrag2	None	18349909	TINLENYKEVTELIR	TINLENYKEVTELIR	4	15	4.56	3500	0	0	0	0	738851	49032		32	2.3	y4	289530	1730	174230307433588	761535382890588	0.0637	Red	39376	18349704	18349737	407018	3076	3076.00	3.00	3
28	NCDO2118_RS00195	acetyltransferase 38155:38676 forward MW:19369	Regular	10829870	0.29	193690373	21	7	19	34.10	48290	40365	10829	0	6	Pass2	PepFrag2	None	14007209	FGYVPASQYQIK	FGYVPASQYQIK	127	12	9.52	3504	0	0	0	0	1085759	50704	Missing	214	1.9	b8	216691	1287	143046970786289	103046970786289	0.0499	Red	6041	14007033	14007063	233873	2411	2411.00	2.00	2
28	NCDO2118_RS00195	acetyltransferase 38155:38676 forward MW:19369	Regular	10829870	0.29	193690373	21	7	19	34.10	48290	40365	10829	0	7	Pass2	PepFrag2	None	20690073	NEEGYIKDLEIVAFEDGK	NEEGYIKDLEIVAFEDGK	40	18	3.82	3501	1	1	0	0	3961551	56325		317	1.7	b8b12	353197	1900	185465030305411	145465030305411	0.0246	Yellow	30197	20689857	20689852	350151	1188	1188.00	2.00	2
28	NCDO2118_RS00195	acetyltransferase 38155:38676 forward MW:19369	Regular	2477718	1.65	193690373	8	6	19	38.15	11974	7557	3733	1	1	Pass1	PepFrag1	None	8594884	EVTELIR	EVTELIR	12	7	4.26	1560	4	4	2	0	44152950	60390		2508	2.1	y3y4y5y7	190162	812	105227758728806	170455517457613	0.4426	Green	5105	8594844	8594859	189050	5300	5300.00	1.42	1
28	NCDO2118_RS00195	acetyltransferase 38155:38676 forward MW:19369	Regular	2477718	1.65	193690373	8	6	19	38.15	11974	7557	3733	0	2	Pass1	PepFrag1	None	20690073	NEEGYIKDLEIVAFEDGK	NEEGYIKDLEIVAFEDGK	40	18	3.82	1562	0	0	0	0	978918	43848		210	1.7	b2b7*y5	316887	1900	185465030305411	836433535369406	0.0968	Red	9991	20690153	20690155	244942	1159	1159.00	3.00	3
28	NCDO2118_RS00195	acetyltransferase 38155:38676 forward MW:19369	Regular	2477718	1.65	193690373	8	6	19	38.15	11974	7557	3733	0	3	Pass1	PepFrag1	None	10185051	ELTDGGLEGK	ELTDGGLEGK	152	10	3.83	1564	2	2	0	0	951970	43727		793	1.4	b6b6y10	160804	929	115107452787569	190214905575137	0.0917	Red	8261	10185009	10185017	222869	1098	1098.00	1.28	1
28	NCDO2118_RS00195	acetyltransferase 38155:38676 forward MW:19369	Regular	2477718	1.65	193690373	8	6	19	38.15	11974	7557	3733	0	4	Pass1	PepFrag1	None	29664014	EVTELIRESFSQSEHGYGNEAELVDK	EVTELIRESFSQSEHGYGNEAELVDK	12	26	4.07	1561	1	1	0	0	1280182	45013		111	1.9	b20y9*	284462	2689	233786898240192	115857932160128	0.0863	Red	12986	29663868	29663810	296553	1033	1033.00	3.00	3
28	NCDO2118_RS00195	acetyltransferase 38155:38676 forward MW:19369	Regular	2477718	1.65	193690373	8	6	19	38.15	11974	7557	3733	0	5	Pass2	PepFrag2	None	14007209	FGYVPASQYQIK	FGYVPASQYQIK	127	12	9.52	1563	0	0	0	0	3785939	49722	Identified	77	2.0	y8*y8	217708	1287	143046970786289	103046970786289	0.2144	Yellow	11784	14007035	14007054	271544	2567	2567.00	2.00	2
28	NCDO2118_RS00195	acetyltransferase 38155:38676 forward MW:19369	Regular	2477718	1.65	193690373	8	6	19	38.15	11974	7557	3733	0	6	Pass2	PepFrag2	None	16619585	GLVLAPLDVLTTHQGK	GLVLAPLDVLTTHQGK	78	16	7.82	1565	1	1	0	0	857399	43272	Missing	34	1.5	y6	295951	1603	165595545103273	125595545103273	0.0682	Red	9962	16619846	16619856	244326	817	817.00	2.00	2
28	NCDO2118_RS00195	acetyltransferase 38155:38676 forward MW:19369	Regular	1038737	1.84	193690373	5	2	19	9.83	6029	9043.5	851	1	1	Pass1	PepFrag1	None	10185051	ELTDGGLEGK	ELTDGGLEGK	152	10	3.83	868	4	4	2	0	15307400	52014		820	2.2	b6y3y6y7y8y8	159982	929	115107452787569	751074527875687	0.6726	Yellow	2577	10184979	10184996	152089	4055	4055.00	2.00	2
28	NCDO2118_RS00195	acetyltransferase 38155:38676 forward MW:19369	Regular	1038737	1.84	193690373	5	2	19	9.83	6029	9043.5	851	0	2	Pass1	PepFrag1	None	8524098	NEEGYIK	NEEGYIK	40	7	4.26	869	1	1	0	0	3803925	45967		31	1.5	b6	118787	762	100862473666398	608624736663978	0.3274	Red	1240	8524044	8524064	109990	1974	1974.00	2.00	2
28	NCDO2118_RS00195	acetyltransferase 38155:38676 forward MW:19369	Regular	3062738	2.42	193690373	6	2	19	9.83	6003	9004.5	2754	1	1	Pass1	PepFrag1	None	8594884	EVTELIR	EVTELIR	12	7	4.26	2027	6	6	2	1	73659310	63533		2713	2.0	b4y1y2y3y5y7	191363	812	105227758728806	170455517457613	0.7816	Green	6878	8594797	8594813	189891	4692	4692.00	1.47	1
28	NCDO2118_RS00195	acetyltransferase 38155:38676 forward MW:19369	Regular	3062738	2.42	193690373	6	2	19	9.83	6003	9004.5	2754	0	2	Pass1	PepFrag1	None	10185051	ELTDGGLEGK	ELTDGGLEGK	152	10	3.83	2026	0	0	0	0	1423849	46396		41	1.5	b4	156928	929	115107452787569	751074527875687	0.2184	Red	2336	10185048	10185072	143634	1311	1311.00	2.00	2
28	NCDO2118_RS00195	acetyltransferase 38155:38676 forward MW:19369	Regular	1450211	3.3	193690373	5	3	19	14.45	7889	10182	3495	1	1	Pass1	PepFrag1	None	8594884	EVTELIR	EVTELIR	12	7	4.26	2483	4	4	1	0	29813250	56358		3334	2.2	b4b5b5y4y5y7	189933	812	105227758728806	170455517457613	0.7295	Yellow	6145	8594848	8594864	189438	5755	5755.00	1.35	1
28	NCDO2118_RS00195	acetyltransferase 38155:38676 forward MW:19369	Regular	1450211	3.3	193690373	5	3	19	14.45	7889	10182	3495	0	2	Pass1	PepFrag1	None	20690073	NEEGYIKDLEIVAFEDGK	NEEGYIKDLEIVAFEDGK	40	18	3.82	2484	0	0	0	0	695331	40036		128	1.7	b7b15	316271	1900	185465030305411	836433535369406	0.1309	Red	11359	20690193	20690199	245647	1033	1033.00	3.00	3
28	NCDO2118_RS00195	acetyltransferase 38155:38676 forward MW:19369	Regular	1450211	3.3	193690373	5	3	19	14.45	7889	10182	3495	0	3	Pass2	PepFrag2	None	10185051	ELTDGGLEGK	ELTDGGLEGK	152	10	3.83	2485	1	1	0	0	2967773	46339		33	1.4	y8	158160	929	115107452787569	751074527875687	0.1396	Red	2000	10185110	10185137	143583	1101	1101.00	2.00	2
29	NCDO2118_RS00205	aminotransferase A 39007:40182 forward MW:43199	Regular	10405620	0	431986822	16	7	30	7.16	90296	64338	34912	1	1	Pass1	PepFrag1	None	12626263	IPADLEQDSFK	IPADLEQDSFK	326	11	3.70	1136	10	10	5	1	361610700	75755	Identified	31387	6.2	b4b11b11*y1y3y5y6y7y8y9y10y10y11	213734	1153	132936989368312	929369893683116	0.6898	Green	9027	12626277	12626294	208731	62288	62288.00	2.00	2
29	NCDO2118_RS00205	aminotransferase A 39007:40182 forward MW:43199	Regular	10405620	0	431986822	16	7	30	7.16	90296	64338	34912	0	2	Pass1	PepFrag1	None	8474308	FNPNLDK	FNPNLDK	6	7	6.78	1137	1	1	0	0	5527237	57598	Identified	325	1.2	y5y7	133931	767	101303210716176	162606421432352	0.0130	Green	7250	8474283	8474299	193097	1176	1176.00	1.40	1
29	NCDO2118_RS00205	aminotransferase A 39007:40182 forward MW:43199	Regular	10405620	0	431986822	16	7	30	7.16	90296	64338	34912	0	3	Pass2	PepFrag2	None	11535670	QAASEFMNKK	QAASEFMNKK	73	10	9.88	1138	0	0	0	0	428997	46497		78	2.1	b9	123435	1055	125293326741987	852933267419869	0.0391	Red	4936	11535797	11535817	171839	3531	3531.00	2.00	2
29	NCDO2118_RS00205	aminotransferase A 39007:40182 forward MW:43199	Regular	10405620	0	431986822	16	7	30	7.16	90296	64338	34912	0	4	Pass2	PepFrag2	None	10254721	QAASEFMNK	QAASEFMNK	73	9	7.00	1142	1	1	0	0	5322242	57434		183	1.2	y4	153538	920	11436281910869	743628191086898	0.0097	Green	2088	10254664	10254688	140352	874	874.00	2.00	2
29	NCDO2118_RS00205	aminotransferase A 39007:40182 forward MW:43199	Regular	10405620	0	431986822	16	7	30	7.16	90296	64338	34912	0	5	Pass2	VarMod	Oxidation M(10);Phosphoryl STY(7)	24851680	ANDFVLTPEMLEQAIVEREGK	ANDFVLTPEMLEQAIVEREGK	145	21	4.00	1140	1	1	0	0	473308	46924	Missing	161	4.9	b8-H3PO4b9b9-H3PO4	347810	2226	206115067482983	974100449886553	0.1908	Red	15702	24851603	24851574	281354	17228	17228.00	2.93	3
29	NCDO2118_RS00205	aminotransferase A 39007:40182 forward MW:43199	Regular	10405620	0	431986822	16	7	30	7.16	90296	64338	34912	0	6	Pass2	VarMod	Phosphoryl STY(9)	13425926	IPADLEQDSFK	IPADLEQDSFK	326	11	3.70	1141	2	2	0	0	1513395	51972	Missing	2410	2.3	b3b7b7*y3-H3PO4	213734	1153	132936989368312	929369893683116	0.0486	Yellow	4684	13425846	13425859	169435	4390	4390.00	2.00	2
29	NCDO2118_RS00205	aminotransferase A 39007:40182 forward MW:43199	Regular	10405620	0	431986822	16	7	30	7.16	90296	64338	34912	0	7	Pass2	VarMod	Oxidation M(7)	11695619	QAASEFMNKK	QAASEFMNKK	73	10	9.88	1139	1	1	0	0	1046921	50372		368	1.2	b9*b9y7y9	123435	1055	125293326741987	852933267419869	0.0090	Yellow	3911	11695525	11695545	162304	809	809.00	2.00	2
29	NCDO2118_RS00205	aminotransferase A 39007:40182 forward MW:43199	Regular	34590840	0	431986822	57	9	30	25.32	122001	81575	38644	1	1	Pass1	PepFrag1	None	18629759	AVILNYPANPTGVTYNR	AVILNYPANPTGVTYNR	168	17	9.59	1616	20	20	11	8	613069300	83265	Identified	19214	5.9	b3b4b5b5*b6b6*b8b9b13b13b14b17y3y4y5*y6y6*y7*y8y9y11y11*y12y13y14y15y17y17*	249861	1724	173827229574288	133827229574288	0.2928	Green	8663	18629809	18629804	248004	35718	35718.00	2.05	2
29	NCDO2118_RS00205	aminotransferase A 39007:40182 forward MW:43199	Regular	34590840	0	431986822	57	9	30	25.32	122001	81575	38644	0	2	Pass1	PepFrag1	None	14837831	IIEPDGAFYIFAK	IIEPDGAFYIFAK	313	13	4.07	1618	6	6	2	1	67057710	73654	Identified	6645	4.6	b3b11y5y6y8y10y11	355906	1390	150580765645106	110580765645106	0.1912	Green	30655	14837831	14837844	344778	23329	23329.00	2.00	2
29	NCDO2118_RS00205	aminotransferase A 39007:40182 forward MW:43199	Regular	34590840	0	431986822	57	9	30	25.32	122001	81575	38644	0	3	Pass1	PepFrag1	None	9135717	ELVAQIIK	ELVAQIIK	253	8	7.00	1621	2	2	0	0	2435379	59255		3078	3.8	b7b7y8	231677	902	112866223174165	728662231741653	0.1847	Yellow	6159	9135664	9135688	231405	22528	22528.00	1.78	2
29	NCDO2118_RS00205	aminotransferase A 39007:40182 forward MW:43199	Regular	34590840	0	431986822	57	9	30	25.32	122001	81575	38644	0	4	Pass1	PepFrag1	None	22081448	ENAVAIIPGIAFGQYGEGFVR	ENAVAIIPGIAFGQYGEGFVR	344	21	4.26	1619	12	12	7	3	82937170	74577	Identified	7187	4.4	b3b4b5b5b6b6b7b7*b7b16*b16y1y11y13y13*y13y14y15y16y21	399533	2052	195229093835235	155229093835235	0.1042	Green	38981	22081591	22081562	383011	12714	12714.00	2.20	2
29	NCDO2118_RS00205	aminotransferase A 39007:40182 forward MW:43199	Regular	34590840	0	431986822	57	9	30	25.32	122001	81575	38644	0	5	Pass1	PepFrag1	None	8605353	IGLIFAAR	IGLIFAAR	245	8	11.05	1617	5	5	1	1	56605380	72918		889	1.9	b3y2y4y5y7	266543	837	107376672019426	673766720194256	0.0298	Green	14974	8605283	8605306	279876	3641	3641.00	2.00	2
29	NCDO2118_RS00205	aminotransferase A 39007:40182 forward MW:43199	Regular	34590840	0	431986822	57	9	30	25.32	122001	81575	38644	0	6	Pass2	PepFrag2	None	6193484	MDLLK	MDLLK	0	5	6.78	1620	4	4	2	0	2417925	59224		454	2.0	b2b3b4y4	180852	598	858144500315464	131628900063093	0.1161	Yellow	16732	6193527	6193548	287161	14166	14166.00	1.00	1
29	NCDO2118_RS00205	aminotransferase A 39007:40182 forward MW:43199	Regular	34590840	0	431986822	57	9	30	25.32	122001	81575	38644	0	7	Pass2	PepFrag2	None	10254721	QAASEFMNK	QAASEFMNK	73	9	7.00	1624	1	1	0	0	554601	52829		40	2.2	y3	149463	920	11436281910869	743628191086898	0.0385	Red	11522	10254495	10254519	264560	4695	4695.00	2.00	2
29	NCDO2118_RS00205	aminotransferase A 39007:40182 forward MW:43199	Regular	34590840	0	431986822	57	9	30	25.32	122001	81575	38644	0	8	Pass2	VarMod	Phosphoryl STY(11)	23692013	AVILNYPANPTGVTYNRGQIK	AVILNYPANPTGVTYNRGQIK	168	21	10.04	1622	3	3	0	0	2704442	59710	Identified	281	2.9	b11*b11y2y9y12	244562	2145	201084146389369	940560975929125	0.0352	Yellow	39845	23692028	23692023	387249	4297	4297.00	3.00	3
29	NCDO2118_RS00205	aminotransferase A 39007:40182 forward MW:43199	Regular	34590840	0	431986822	57	9	30	25.32	122001	81575	38644	0	9	Pass2	VarMod	Oxidation M(9)	26242405	LSYAASMDMIEQAMARLTDYVTK	LSYAASMDMIEQAMARLTDYVTK	365	23	4.31	1623	4	4	1	0	2186781	58788		856	1.7	b2b6b17y4y7y9y10	371718	2419	217863033515024	10524202234335	0.0075	Yellow	34138	26242543	26242518	359392	913	913.00	2.69	3
29	NCDO2118_RS00205	aminotransferase A 39007:40182 forward MW:43199	Regular	22195560	0	431986822	23	7	30	14.58	107121	100311	54333	1	1	Pass1	PepFrag1	None	12626263	IPADLEQDSFK	IPADLEQDSFK	326	11	3.70	614	16	16	13	5	775015500	82356	Identified	51336	6.8	b2b3b4b7*b8b9b9b10y2y3y4y5y5*y6y6y7y8y9y9y10y11	217077	1153	132936989368312	929369893683116	0.7514	Green	9549	12626212	12626243	207509	80494	80494.00	2.00	2
29	NCDO2118_RS00205	aminotransferase A 39007:40182 forward MW:43199	Regular	22195560	0	431986822	23	7	30	14.58	107121	100311	54333	0	2	Pass1	PepFrag1	None	11595776	NGADDALPMKK	NGADDALPMKK	283	11	6.89	616	1	1	0	0	10112570	63511	Identified	546	3.9	y4y11*	156692	1068	126320490295024	863204902950241	0.1701	Green	4481	11595711	11595743	166578	18218	18218.00	2.00	2
29	NCDO2118_RS00205	aminotransferase A 39007:40182 forward MW:43199	Regular	22195560	0	431986822	23	7	30	14.58	107121	100311	54333	0	3	Pass2	PepFrag2	None	4883079	DLLK	DLLK	1	4	6.78	620	1	1	0	0	1172678	54154		680	0.0	b3y4	140970	474	734985089361023	106997017872205	0.0260	Yellow	1930	4883163	4883186	137333	2781	1404.30	1.00	1
29	NCDO2118_RS00205	aminotransferase A 39007:40182 forward MW:43199	Regular	22195560	0	431986822	23	7	30	14.58	107121	100311	54333	0	4	Pass2	PepFrag2	None	10254721	QAASEFMNK	QAASEFMNK	73	9	7.00	615	1	1	0	0	3825915	59290		219	1.5	b3b8y8	153756	920	11436281910869	743628191086898	0.0149	Green	3199	10254741	10254774	154282	1599	1599.00	2.00	2
29	NCDO2118_RS00205	aminotransferase A 39007:40182 forward MW:43199	Regular	22195560	0	431986822	23	7	30	14.58	107121	100311	54333	0	5	Pass2	PepFrag2	None	8474308	FNPNLDK	FNPNLDK	6	7	6.78	619	2	2	0	0	418491	49680	Missing	276	1.1	b7*y3y7	145139	767	101303210716176	162606421432352	0.0086	Yellow	7779	8474125	8474149	193519	926	926.00	1.00	1
29	NCDO2118_RS00205	aminotransferase A 39007:40182 forward MW:43199	Regular	22195560	0	431986822	23	7	30	14.58	107121	100311	54333	0	6	Pass2	VarMod	Phosphoryl STY(9)	13425926	IPADLEQDSFK	IPADLEQDSFK	326	11	3.70	618	1	1	0	0	1398303	54919	Missing	359	1.6	b6b10-H3PO4y11	217077	1153	132936989368312	929369893683116	0.0156	Yellow	4075	13425904	13425934	163398	1673	1673.00	2.00	2
29	NCDO2118_RS00205	aminotransferase A 39007:40182 forward MW:43199	Regular	22195560	0	431986822	23	7	30	14.58	107121	100311	54333	0	7	Pass2	VarMod	Phosphoryl STY(*)	18258408	LTLGEPDFYTPEHVK	LTLGEPDFYTPEHVK	34	15	4.42	617	1	1	0	0	1480954	55168	Missing	917	1.7	b13-H3PO4b14y15	243783	1605	165733254506207	704888363374711	0.0133	Yellow	6949	18258383	18258412	187534	1430	1430.00	2.36	3
29	NCDO2118_RS00205	aminotransferase A 39007:40182 forward MW:43199	Regular	10187110	0	431986822	25	5	30	12.79	96841	85678	49549	1	1	Pass1	PepFrag1	None	8474308	FNPNLDK	FNPNLDK	6	7	6.78	1869	3	3	0	0	37145830	65780	Identified	40082	5.1	b7y5y7y7*	140899	767	101303210716176	162606421432352	0.6132	Green	1399	8474258	8474274	160304	59385	59385.00	1.04	1
29	NCDO2118_RS00205	aminotransferase A 39007:40182 forward MW:43199	Regular	10187110	0	431986822	25	5	30	12.79	96841	85678	49549	0	2	Pass1	PepFrag1	None	16178483	QFDQQVSSIPDIIK	QFDQQVSSIPDIIK	20	14	3.88	1867	13	13	7	2	230835200	73714	Identified	6771	4.6	b2b3b4b4*b5b5*b6*b7b9b11b13b14b14y5y7y8y8y9y10y10*y14	289268	1507	158916308824543	118916308824543	0.2255	Green	13204	16178495	16178506	284523	21839	21839.00	2.00	2
29	NCDO2118_RS00205	aminotransferase A 39007:40182 forward MW:43199	Regular	10187110	0	431986822	25	5	30	12.79	96841	85678	49549	0	3	Pass1	PepFrag1	None	20750478	ANDFVLTPEMLEQAIVER	ANDFVLTPEMLEQAIVER	145	18	3.69	1868	8	8	2	2	27302490	64443	Identified	1891	2.8	b5b6*b7b7b10b12*y6y11y12y13y18	380964	1934	187671048641265	147671048641265	0.0460	Green	21327	20750617	20750599	403573	4454	4454.00	2.20	2
29	NCDO2118_RS00205	aminotransferase A 39007:40182 forward MW:43199	Regular	10187110	0	431986822	25	5	30	12.79	96841	85678	49549	0	4	Pass2	MissedCleavage	None	11697252	GQIKALAEVLK	GQIKALAEVLK	185	11	9.88	1870	1	1	0	0	2016854	53127		30	1.4	b8	214886	1152	13286011384771	928601138477099	0.0110	Yellow	3964	11697208	11697234	196558	1064	1064.00	2.00	2
29	NCDO2118_RS00205	aminotransferase A 39007:40182 forward MW:43199	Regular	10187110	0	431986822	25	5	30	12.79	96841	85678	49549	0	5	Pass2	VarMod	Phosphoryl STY(22)	28073579	IIEPDGAFYIFAKIPADLEQDSFK	IIEPDGAFYIFAKIPADLEQDSFK	313	24	3.86	1871	0	0	0	0	1026421	50194	Missing	775	4.2	b7b8y11y14y24*	401670	2543	225246062384872	110164041589915	0.1043	Red	16146	28073755	28073720	313354	10099	10099.00	3.00	3
29	NCDO2118_RS00205	aminotransferase A 39007:40182 forward MW:43199	Regular	51787620	0	431986822	81	17	30	48.34	250124	151498	58848	1	1	Pass1	PepFrag1	None	18629759	AVILNYPANPTGVTYNR	AVILNYPANPTGVTYNR	168	17	9.59	1215	23	23	18	9	1037289000	87301	Identified	25503	7.4	b3b4b5b5*b6b6*b7b8b9b9*b10b13b14y2y3y4y5y5*y6y8y9y10y11y11*y12y12*y13y14y17y17*	255957	1724	173827229574288	133827229574288	0.2669	Green	9951	18629787	18629789	246057	66761	66761.00	2.04	2
29	NCDO2118_RS00205	aminotransferase A 39007:40182 forward MW:43199	Regular	51787620	0	431986822	81	17	30	48.34	250124	151498	58848	0	2	Pass1	PepFrag1	None	9135717	ELVAQIIK	ELVAQIIK	253	8	7.00	1223	1	1	0	0	494233	54082		386	5.1	b6*y2	235500	902	112866223174165	728662231741653	0.2035	Red	6855	9135630	9135660	228647	50899	50899.00	2.00	2
29	NCDO2118_RS00205	aminotransferase A 39007:40182 forward MW:43199	Regular	51787620	0	431986822	81	17	30	48.34	250124	151498	58848	0	3	Pass1	PepFrag1	None	7973862	MSDLGFK	MSDLGFK	306	7	6.78	1225	3	3	0	0	5344264	64421		4121	4.2	b6b6y3y7	170231	730	98018535093507	156037070187014	0.1353	Green	20528	7973868	7973892	289626	33838	33838.00	1.00	1
29	NCDO2118_RS00205	aminotransferase A 39007:40182 forward MW:43199	Regular	51787620	0	431986822	81	17	30	48.34	250124	151498	58848	0	4	Pass1	PepFrag1	None	14837831	IIEPDGAFYIFAK	IIEPDGAFYIFAK	313	13	4.07	1217	3	3	1	0	17588700	69595	Identified	8857	5.1	b3y6y10y11	354728	1390	150580765645106	110580765645106	0.1278	Green	33555	14837837	14837858	341743	31954	31954.00	2.00	2
29	NCDO2118_RS00205	aminotransferase A 39007:40182 forward MW:43199	Regular	51787620	0	431986822	81	17	30	48.34	250124	151498	58848	0	5	Pass1	PepFrag1	None	16178483	QFDQQVSSIPDIIK	QFDQQVSSIPDIIK	20	14	3.88	1216	7	7	2	0	14657260	68803	Missing	5628	4.2	b4*b5b5*b14y7y8y11y12y14	273598	1507	158916308824543	118916308824543	0.0697	Green	17450	16178533	16178549	277394	17443	17443.00	2.00	2
29	NCDO2118_RS00205	aminotransferase A 39007:40182 forward MW:43199	Regular	51787620	0	431986822	81	17	30	48.34	250124	151498	58848	0	6	Pass1	PepFrag1	None	22081448	ENAVAIIPGIAFGQYGEGFVR	ENAVAIIPGIAFGQYGEGFVR	344	21	4.26	1219	11	11	6	4	55492720	74585	Identified	8279	4.7	b5b5b6b6*b7b7*b8b10b13*y6y13y14y15y16y17y21	414457	2052	195229093835235	155229093835235	0.0620	Green	41982	22081548	22081525	380289	15507	15507.00	2.02	2
29	NCDO2118_RS00205	aminotransferase A 39007:40182 forward MW:43199	Regular	51787620	0	431986822	81	17	30	48.34	250124	151498	58848	0	7	Pass1	PepFrag1	None	17878125	LSYAASMDMIEQAMAR	LSYAASMDMIEQAMAR	365	16	4.07	1218	9	9	2	1	18856060	69897		1504	3.2	b4b6b8b9y1y3y5y11y12	329490	1637	16792889121334	12792889121334	0.0287	Green	34206	17878188	17878195	343953	7188	7188.00	2.08	2
29	NCDO2118_RS00205	aminotransferase A 39007:40182 forward MW:43199	Regular	51787620	0	431986822	81	17	30	48.34	250124	151498	58848	0	8	Pass1	PepFrag1	None	7974192	FAVDFAK	FAVDFAK	337	7	6.78	1214	6	6	2	0	38950710	73047		988	1.8	b4y1y2y4y6y7	195050	735	984655989339305	156931197867861	0.0139	Green	4293	7974196	7974219	211757	3487	3487.00	1.51	1
29	NCDO2118_RS00205	aminotransferase A 39007:40182 forward MW:43199	Regular	51787620	0	431986822	81	17	30	48.34	250124	151498	58848	0	9	Pass1	PepFrag1	None	12626263	IPADLEQDSFK	IPADLEQDSFK	326	11	3.70	1226	1	1	0	0	17052240	69460	Identified	32	1.7	y10	230876	1153	132936989368312	929369893683116	0.0072	Green	11111	12626250	12626277	252349	1794	1794.00	2.00	2
29	NCDO2118_RS00205	aminotransferase A 39007:40182 forward MW:43199	Regular	51787620	0	431986822	81	17	30	48.34	250124	151498	58848	0	10	Pass1	PepFrag1	None	23942300	THQYLVTSASTQSQFAAIEALK	THQYLVTSASTQSQFAAIEALK	261	22	7.77	1224	1	1	0	0	883942	56607		577	1.9	b3*b6*b10*y1y7	325950	2223	205929837121419	972865580809459	0.0052	Yellow	43244	23942299	23942289	385877	1309	1309.00	3.00	3
29	NCDO2118_RS00205	aminotransferase A 39007:40182 forward MW:43199	Regular	51787620	0	431986822	81	17	30	48.34	250124	151498	58848	0	11	Pass2	PepFrag2	None	8605353	IGLIFAAR	IGLIFAAR	245	8	11.05	1222	4	4	2	0	1141693	57718		666	2.4	b4b5b6y8	257428	837	107376672019426	174753344038851	0.0244	Yellow	39142	8605265	8605288	366528	6112	6112.00	1.00	1
29	NCDO2118_RS00205	aminotransferase A 39007:40182 forward MW:43199	Regular	51787620	0	431986822	81	17	30	48.34	250124	151498	58848	0	12	Pass2	PepFrag2	None	20750478	ANDFVLTPEMLEQAIVER	ANDFVLTPEMLEQAIVER	145	18	3.69	1220	7	7	0	1	7020219	65606	Missing	1291	2.7	b2b5b10*b13*b17y3y5y6y13y17	415240	1934	187671048641265	147671048641265	0.0166	Green	44688	20750651	20750639	393122	4146	4146.00	2.09	2
29	NCDO2118_RS00205	aminotransferase A 39007:40182 forward MW:43199	Regular	51787620	0	431986822	81	17	30	48.34	250124	151498	58848	0	13	Pass2	PepFrag2	None	6193484	MDLLK	MDLLK	0	5	6.78	1230	2	2	0	0	1785956	59661		140	1.7	b5y3	157725	598	858144500315464	131628900063093	0.0162	Yellow	10410	6193280	6193303	248475	4059	4059.00	1.00	1
29	NCDO2118_RS00205	aminotransferase A 39007:40182 forward MW:43199	Regular	51787620	0	431986822	81	17	30	48.34	250124	151498	58848	0	14	Pass2	PepFrag2	None	23892068	ANDFVLTPEMLEQAIVEREGK	ANDFVLTPEMLEQAIVEREGK	145	21	4.00	1221	1	1	0	0	2317925	60793	Missing	246	1.7	b14b20*y16y16*y16	369667	2226	206115067482983	166115067482983	0.0036	Green	38980	23892324	23892285	365611	906	906.00	2.00	2
29	NCDO2118_RS00205	aminotransferase A 39007:40182 forward MW:43199	Regular	51787620	0	431986822	81	17	30	48.34	250124	151498	58848	0	15	Pass2	MissedCleavage	None	17869534	SHAMTGWRIGLIFAAR	SHAMTGWRIGLIFAAR	237	16	12.40	1227	1	1	0	0	7706102	66011		45	1.9	y4	321603	1671	17024613746856	13024613746856	0.0065	Green	12350	17869525	17869532	257758	1626	1626.00	2.50	2
29	NCDO2118_RS00205	aminotransferase A 39007:40182 forward MW:43199	Regular	51787620	0	431986822	81	17	30	48.34	250124	151498	58848	0	16	Pass2	VarMod	Phosphoryl STY(11)	23692013	AVILNYPANPTGVTYNRGQIK	AVILNYPANPTGVTYNRGQIK	168	21	10.04	1229	0	0	0	0	1510020	58932	Missing	157	2.2	y6*y8*	247576	2145	201084146389369	940560975929125	0.0074	Yellow	46732	23692167	23692159	417432	1854	1854.00	3.00	3
29	NCDO2118_RS00205	aminotransferase A 39007:40182 forward MW:43199	Regular	51787620	0	431986822	81	17	30	48.34	250124	151498	58848	0	17	Pass2	VarMod	Phosphoryl STY(4)	9234961	IEISLIR	IEISLIR	13	7	7.00	1228	1	1	0	0	3839565	62985		428	1.3	y4y6	228963	826	10643382394892	664338239489203	0.0050	Green	3970	9234927	9234957	209227	1241	1241.00	2.00	2
29	NCDO2118_RS00205	aminotransferase A 39007:40182 forward MW:43199	Regular	6576383	0	431986822	15	3	30	8.95	59840	142170	21179	1	1	Pass1	PepFrag1	None	12626263	IPADLEQDSFK	IPADLEQDSFK	326	11	3.70	1307	11	11	4	2	232716300	71848	Identified	19510	5.6	b2b4b5b8b11y1y3y4y6y6y7y8*y9y10y10y11	223050	1153	132936989368312	929369893683116	0.7919	Green	8070	12626233	12626258	208457	47390	47390.00	2.00	2
29	NCDO2118_RS00205	aminotransferase A 39007:40182 forward MW:43199	Regular	6576383	0	431986822	15	3	30	8.95	59840	142170	21179	0	2	Pass2	PepFrag2	None	17458745	LTLGEPDFYTPEHVK	LTLGEPDFYTPEHVK	34	15	4.42	1309	1	1	0	0	765776	47021	Missing	125	2.0	b8	258233	1605	165733254506207	125733254506207	0.0327	Red	12252	17458253	17458265	256847	1959	1959.00	2.27	2
29	NCDO2118_RS00205	aminotransferase A 39007:40182 forward MW:43199	Regular	6576383	0	431986822	15	3	30	8.95	59840	142170	21179	0	3	Pass2	VarMod	Phosphoryl STY(15)	26372490	QAGIAAIENNQSHYTGMAGLLELR	QAGIAAIENNQSHYTGMAGLLELR	49	24	5.30	1308	3	3	0	0	2164636	51534		1544	4.3	b5*b7*b12*y4y10-H3PO4y11y24	321787	2367	214729546132035	673647730660177	0.1753	Yellow	7866	26372511	26372511	206665	10491	10491.00	3.72	4
29	NCDO2118_RS00205	aminotransferase A 39007:40182 forward MW:43199	Regular	5887883	0	431986822	20	5	30	16.62	23760	18787	6821	1	1	Pass1	PepFrag1	None	16178483	QFDQQVSSIPDIIK	QFDQQVSSIPDIIK	20	14	3.88	1710	10	10	6	2	143906900	69280	Identified	3317	3.6	b4*b5b5*b6b6*b12*b13b14*y5y6y7y8y9y10y14	292984	1507	158916308824543	118916308824543	0.4655	Green	11131	16178498	16178505	284572	11060	11060.00	2.00	2
29	NCDO2118_RS00205	aminotransferase A 39007:40182 forward MW:43199	Regular	5887883	0	431986822	20	5	30	16.62	23760	18787	6821	0	2	Pass1	PepFrag1	None	11595776	NGADDALPMKK	NGADDALPMKK	283	11	6.89	1714	2	2	0	0	1365400	49052	Missing	2651	2.3	b9y11	144800	1068	126320490295024	863204902950241	0.1785	Red	5175	11595793	11595819	217996	4241	4241.00	2.00	2
29	NCDO2118_RS00205	aminotransferase A 39007:40182 forward MW:43199	Regular	5887883	0	431986822	20	5	30	16.62	23760	18787	6821	0	3	Pass1	PepFrag1	None	18629759	AVILNYPANPTGVTYNR	AVILNYPANPTGVTYNR	168	17	9.59	1713	2	2	0	0	3281800	52861	Identified	132	2.5	b9*y9y16	253928	1724	173827229574288	758848197161917	0.1467	Yellow	10045	18629757	18629787	270249	3486	3486.00	3.00	3
29	NCDO2118_RS00205	aminotransferase A 39007:40182 forward MW:43199	Regular	5887883	0	431986822	20	5	30	16.62	23760	18787	6821	0	4	Pass1	PepFrag1	None	20750478	ANDFVLTPEMLEQAIVER	ANDFVLTPEMLEQAIVER	145	18	3.69	1711	4	4	0	0	11314210	58236	Identified	561	2.5	b5y8y11y18	381464	1934	187671048641265	147671048641265	0.1306	Green	17231	20750543	20750514	403307	3102	3102.00	2.30	2
29	NCDO2118_RS00205	aminotransferase A 39007:40182 forward MW:43199	Regular	5887883	0	431986822	20	5	30	16.62	23760	18787	6821	0	5	Pass1	PepFrag1	None	6193484	MDLLK	MDLLK	0	5	6.78	1712	2	2	0	0	2599845	51849		160	1.3	b3b3y1	179284	598	858144500315464	131628900063093	0.0787	Yellow	8637	6193453	6193472	253726	1871	1871.00	1.00	1
29	NCDO2118_RS00205	aminotransferase A 39007:40182 forward MW:43199	Regular	24931020	0	431986822	60	14	30	32.74	138917	75572	34157	1	1	Pass1	PepFrag1	None	18629759	AVILNYPANPTGVTYNR	AVILNYPANPTGVTYNR	168	17	9.59	1976	16	16	7	4	344147200	79335	Identified	16109	5.7	b3b4b5b5*b6b6*b7b11b13*y2y4y5*y6y6*y6y7*y8y9y11y11*y13y14y15y17y17*	254603	1724	173827229574288	133827229574288	0.2335	Green	7944	18629772	18629781	246184	32433	32433.00	2.08	2
29	NCDO2118_RS00205	aminotransferase A 39007:40182 forward MW:43199	Regular	24931020	0	431986822	60	14	30	32.74	138917	75572	34157	0	2	Pass1	PepFrag1	None	7434662	ALAEVLK	ALAEVLK	189	7	7.00	1981	3	3	0	1	17570820	66415		397	3.6	b2b6y5y5	188345	731	981080293127274	156216058625455	0.1669	Green	17607	7434619	7434644	294843	23182	23182.00	1.00	1
29	NCDO2118_RS00205	aminotransferase A 39007:40182 forward MW:43199	Regular	24931020	0	431986822	60	14	30	32.74	138917	75572	34157	0	3	Pass1	PepFrag1	None	14837831	IIEPDGAFYIFAK	IIEPDGAFYIFAK	313	13	4.07	1978	6	6	1	1	40515680	70044	Identified	4329	4.3	b3b4y2y7y10y10y13	352594	1390	150580765645106	110580765645106	0.1437	Green	28646	14837808	14837836	343792	19957	19957.00	2.00	2
29	NCDO2118_RS00205	aminotransferase A 39007:40182 forward MW:43199	Regular	24931020	0	431986822	60	14	30	32.74	138917	75572	34157	0	4	Pass1	PepFrag1	None	22081448	ENAVAIIPGIAFGQYGEGFVR	ENAVAIIPGIAFGQYGEGFVR	344	21	4.26	1979	11	11	4	2	86319440	73328	Identified	7573	4.8	b3b4b5*b6b6b7b7*b17*b18y6y9y10y10y12y14y15y21	409716	2052	195229093835235	155229093835235	0.1164	Green	36363	22081521	22081506	382005	16165	16165.00	2.25	2
29	NCDO2118_RS00205	aminotransferase A 39007:40182 forward MW:43199	Regular	24931020	0	431986822	60	14	30	32.74	138917	75572	34157	0	5	Pass1	PepFrag1	None	16178483	QFDQQVSSIPDIIK	QFDQQVSSIPDIIK	20	14	3.88	1977	9	9	2	2	97923850	73876	Identified	3547	3.6	b2b2*b4b5b5*b6y2y5y6y8y12y14y14*	284374	1507	158916308824543	118916308824543	0.0778	Green	14178	16178422	16178445	279320	10804	10804.00	2.00	2
29	NCDO2118_RS00205	aminotransferase A 39007:40182 forward MW:43199	Regular	24931020	0	431986822	60	14	30	32.74	138917	75572	34157	0	6	Pass1	PepFrag1	None	8605353	IGLIFAAR	IGLIFAAR	245	8	11.05	1982	3	3	2	0	1612099	56041		357	2.0	b4b5b6	259133	837	107376672019426	174753344038851	0.0290	Yellow	33673	8605270	8605296	367895	4031	4031.00	1.00	1
29	NCDO2118_RS00205	aminotransferase A 39007:40182 forward MW:43199	Regular	24931020	0	431986822	60	14	30	32.74	138917	75572	34157	0	7	Pass1	PepFrag1	None	9365149	RDYIIEK	RDYIIEK	299	7	6.95	1983	2	2	0	0	3334280	59197		154	1.5	b4b6	85191	872	110349564655678	703495646556783	0.0159	Green	1666	9365071	9365107	186031	2211	2211.00	1.82	2
29	NCDO2118_RS00205	aminotransferase A 39007:40182 forward MW:43199	Regular	24931020	0	431986822	60	14	30	32.74	138917	75572	34157	0	8	Pass2	PepFrag2	None	6803978	KEYLK	KEYLK	293	5	9.63	1989	1	1	0	0	1145375	54557		37	2.0	b3	171046	644	901606178359022	140321235671804	0.0591	Yellow	3534	6803790	6803815	212680	8207	8207.00	1.00	1
29	NCDO2118_RS00205	aminotransferase A 39007:40182 forward MW:43199	Regular	24931020	0	431986822	60	14	30	32.74	138917	75572	34157	0	9	Pass2	PepFrag2	None	7973862	MSDLGFK	MSDLGFK	306	7	6.78	1988	3	3	1	0	1285889	55059		374	1.9	b3b4b7	177964	730	98018535093507	156037070187014	0.0296	Yellow	12215	7973632	7973658	269954	4109	4109.00	1.00	1
29	NCDO2118_RS00205	aminotransferase A 39007:40182 forward MW:43199	Regular	24931020	0	431986822	60	14	30	32.74	138917	75572	34157	0	10	Pass2	PepFrag2	None	6193484	MDLLK	MDLLK	0	5	6.78	1980	1	1	0	0	2644030	58190		159	1.4	b3y5	166187	598	858144500315464	131628900063093	0.0168	Yellow	16611	6193392	6193417	290658	2327	2327.00	1.00	1
29	NCDO2118_RS00205	aminotransferase A 39007:40182 forward MW:43199	Regular	24931020	0	431986822	60	14	30	32.74	138917	75572	34157	0	11	Pass2	MissedCleavage	None	9755258	KFNPNLDK	KFNPNLDK	5	8	9.88	1984	1	1	0	0	1418873	55487	Missing	125	1.4	y6	230547	902	112866223174165	728662231741653	0.0109	Yellow	12226	9755211	9755247	270013	1509	1509.00	2.00	2
29	NCDO2118_RS00205	aminotransferase A 39007:40182 forward MW:43199	Regular	24931020	0	431986822	60	14	30	32.74	138917	75572	34157	0	12	Pass2	MissedCleavage	None	16719428	FNPNLDKIEISLIR	FNPNLDKIEISLIR	6	14	7.03	1985	1	1	0	0	319073	49006	Identified	129	1.4	b2b7	320689	1593	164906136923836	124906136923836	0.0063	Red	36200	16719467	16719487	381223	875	875.00	2.00	2
29	NCDO2118_RS00205	aminotransferase A 39007:40182 forward MW:43199	Regular	24931020	0	431986822	60	14	30	32.74	138917	75572	34157	0	13	Pass2	VarMod	Oxidation M(1)	22781464	MSDLGFKIIEPDGAFYIFAK	MSDLGFKIIEPDGAFYIFAK	306	20	4.31	1987	3	3	0	0	4725911	60712	Missing	774	4.2	b9b20y8	442021	2120	199518670166049	159518670166049	0.0874	Green	20591	22781492	22781471	307505	12141	12141.00	2.08	2
29	NCDO2118_RS00205	aminotransferase A 39007:40182 forward MW:43199	Regular	24931020	0	431986822	60	14	30	32.74	138917	75572	34157	0	14	Pass2	VarMod	Phosphoryl STY(*)	18677788	LSYAASMDMIEQAMAR	LSYAASMDMIEQAMAR	365	16	4.07	1986	0	0	0	0	2105925	57202		93	1.5	b7y6	328977	1637	16792889121334	439644456066701	0.0070	Yellow	7646	18677830	18677852	243654	966	966.00	3.63	4
29	NCDO2118_RS00205	aminotransferase A 39007:40182 forward MW:43199	Regular	9901649	0	431986822	51	14	30	32.74	65770	30406	14722	1	1	Pass1	PepFrag1	None	18629759	AVILNYPANPTGVTYNR	AVILNYPANPTGVTYNR	168	17	9.59	2591	14	14	7	5	103968700	70126	Identified	5247	4.0	b3b4b5b5*b6b9b10b13y4y6*y8y8*y8y9y12y13y14y17	255972	1724	173827229574288	133827229574288	0.1845	Green	6006	18629800	18629798	248098	12132	12132.00	2.06	2
29	NCDO2118_RS00205	aminotransferase A 39007:40182 forward MW:43199	Regular	9901649	0	431986822	51	14	30	32.74	65770	30406	14722	0	2	Pass1	PepFrag1	None	7973862	MSDLGFK	MSDLGFK	306	7	6.78	2596	2	2	0	0	870614	49355		1013	2.6	b6y7	175974	730	98018535093507	156037070187014	0.1460	Red	12862	7973878	7973898	293829	9602	9602.00	1.06	1
29	NCDO2118_RS00205	aminotransferase A 39007:40182 forward MW:43199	Regular	9901649	0	431986822	51	14	30	32.74	65770	30406	14722	0	3	Pass1	PepFrag1	None	14837831	IIEPDGAFYIFAK	IIEPDGAFYIFAK	313	13	4.07	2593	3	3	0	0	16605600	62160	Identified	677	3.2	b3y3y9y10y11	355110	1390	150580765645106	110580765645106	0.1319	Green	23716	14837824	14837841	345405	8672	8672.00	2.00	2
29	NCDO2118_RS00205	aminotransferase A 39007:40182 forward MW:43199	Regular	9901649	0	431986822	51	14	30	32.74	65770	30406	14722	0	4	Pass1	PepFrag1	None	9135717	ELVAQIIK	ELVAQIIK	253	8	7.00	2594	4	4	1	0	4419709	56411		1136	2.6	b7y2y7y8	236387	902	112866223174165	728662231741653	0.1260	Yellow	4224	9135650	9135678	230763	8284	8284.00	1.83	2
29	NCDO2118_RS00205	aminotransferase A 39007:40182 forward MW:43199	Regular	9901649	0	431986822	51	14	30	32.74	65770	30406	14722	0	5	Pass1	PepFrag1	None	22081448	ENAVAIIPGIAFGQYGEGFVR	ENAVAIIPGIAFGQYGEGFVR	344	21	4.26	2598	8	8	1	1	48522240	66816	Identified	2668	3.7	b3b5b5*b5b6b6*b7*b9b13*b16y5y7y10y14	415071	2052	195229093835235	155229093835235	0.1257	Green	30642	22081482	22081454	383743	8267	8267.00	2.30	2
29	NCDO2118_RS00205	aminotransferase A 39007:40182 forward MW:43199	Regular	9901649	0	431986822	51	14	30	32.74	65770	30406	14722	0	6	Pass1	PepFrag1	None	16178483	QFDQQVSSIPDIIK	QFDQQVSSIPDIIK	20	14	3.88	2592	4	4	1	0	37535010	65701	Identified	681	2.4	y5y6y8y14	278608	1507	158916308824543	118916308824543	0.0554	Green	10691	16178474	16178486	281040	3643	3643.00	2.00	2
29	NCDO2118_RS00205	aminotransferase A 39007:40182 forward MW:43199	Regular	9901649	0	431986822	51	14	30	32.74	65770	30406	14722	0	7	Pass1	PepFrag1	None	7974192	FAVDFAK	FAVDFAK	337	7	6.78	2597	2	2	0	0	1519502	51774		226	1.6	b3b6b7	190751	735	984655989339305	156931197867861	0.0390	Red	15211	7974164	7974183	305813	2568	2568.00	1.00	1
29	NCDO2118_RS00205	aminotransferase A 39007:40182 forward MW:43199	Regular	9901649	0	431986822	51	14	30	32.74	65770	30406	14722	0	8	Pass2	PepFrag2	None	7804138	DYIIEK	DYIIEK	300	6	4.07	2604	0	0	0	0	316123	44956		201	1.6	b3b4	155872	724	974807087926016	154961417585203	0.0444	Red	8149	7804317	7804336	265276	2923	2923.00	1.32	1
29	NCDO2118_RS00205	aminotransferase A 39007:40182 forward MW:43199	Regular	9901649	0	431986822	51	14	30	32.74	65770	30406	14722	0	9	Pass2	PepFrag2	None	8605353	IGLIFAAR	IGLIFAAR	245	8	11.05	2602	4	4	2	0	29104030	64597		1020	1.7	y4y6y7y8	269629	837	107376672019426	673766720194256	0.0378	Green	10747	8605214	8605243	281375	2488	2488.00	1.61	2
29	NCDO2118_RS00205	aminotransferase A 39007:40182 forward MW:43199	Regular	9901649	0	431986822	51	14	30	32.74	65770	30406	14722	0	10	Pass2	PepFrag2	None	23942300	THQYLVTSASTQSQFAAIEALK	THQYLVTSASTQSQFAAIEALK	261	22	7.77	2595	3	3	0	0	2287582	53551		473	2.1	b5b8*y10y22	362067	2223	205929837121419	972865580809459	0.0248	Yellow	34009	23942076	23942073	417773	1631	1631.00	2.54	3
29	NCDO2118_RS00205	aminotransferase A 39007:40182 forward MW:43199	Regular	9901649	0	431986822	51	14	30	32.74	65770	30406	14722	0	11	Pass2	PepFrag2	None	7434662	ALAEVLK	ALAEVLK	189	7	7.00	2603	1	1	0	0	943171	49703		31	1.3	b5	192302	731	981080293127274	156216058625455	0.0199	Red	15910	7434541	7434561	308997	1308	1308.00	1.00	1
29	NCDO2118_RS00205	aminotransferase A 39007:40182 forward MW:43199	Regular	9901649	0	431986822	51	14	30	32.74	65770	30406	14722	0	12	Pass2	MissedCleavage	None	16719428	FNPNLDKIEISLIR	FNPNLDKIEISLIR	6	14	7.03	2599	2	2	0	0	1708582	52283	Identified	435	1.4	b2b5b11*	319213	1593	164906136923836	699374246158909	0.0140	Red	15306	16719368	16719407	306511	924	924.00	2.57	3
29	NCDO2118_RS00205	aminotransferase A 39007:40182 forward MW:43199	Regular	9901649	0	431986822	51	14	30	32.74	65770	30406	14722	0	13	Pass2	VarMod	Phosphoryl STY(*)	23692013	AVILNYPANPTGVTYNRGQIK	AVILNYPANPTGVTYNRGQIK	168	21	10.04	2600	1	1	0	0	1178220	50669	Missing	80	2.3	y6*y7	250586	2145	201084146389369	940560975929125	0.0316	Red	34955	23692132	23692132	428796	2081	2081.00	3.00	3
29	NCDO2118_RS00205	aminotransferase A 39007:40182 forward MW:43199	Regular	9901649	0	431986822	51	14	30	32.74	65770	30406	14722	0	14	Pass2	VarMod	Phosphoryl STY(9)	28073579	IIEPDGAFYIFAKIPADLEQDSFK	IIEPDGAFYIFAKIPADLEQDSFK	313	24	3.86	2601	3	3	0	0	1922366	52795	Identified	834	2.0	b6b8b10b11b14y24	429004	2543	225246062384872	110164041589915	0.0190	Yellow	15718	28073776	28073732	308112	1247	1247.00	3.00	3
29	NCDO2118_RS00205	aminotransferase A 39007:40182 forward MW:43199	Regular	6038817	0.49	431986822	18	4	30	9.97	13079	15712.5	4958	1	1	Pass1	PepFrag1	None	16178483	QFDQQVSSIPDIIK	QFDQQVSSIPDIIK	20	14	3.88	1326	11	11	5	1	142588300	69350	Identified	3374	3.3	b3b3*b4*b5*b5b6b6*b12b13*b14y5y6y7y8y9y10y12y14	291644	1507	158916308824543	118916308824543	0.6906	Green	9329	16178432	16178435	284882	9033	9033.00	2.00	2
29	NCDO2118_RS00205	aminotransferase A 39007:40182 forward MW:43199	Regular	6038817	0.49	431986822	18	4	30	9.97	13079	15712.5	4958	0	2	Pass2	PepFrag2	None	7434662	ALAEVLK	ALAEVLK	189	7	7.00	1328	3	3	0	0	3775440	53579		955	1.4	b4y4y7	195430	731	981080293127274	156216058625455	0.1170	Yellow	2973	7434426	7434443	197897	1530	1530.00	1.00	1
29	NCDO2118_RS00205	aminotransferase A 39007:40182 forward MW:43199	Regular	6038817	0.49	431986822	18	4	30	9.97	13079	15712.5	4958	0	3	Pass2	PepFrag2	None	20750478	ANDFVLTPEMLEQAIVER	ANDFVLTPEMLEQAIVER	145	18	3.69	1327	4	4	1	1	17722080	60295	Identified	576	1.9	b7b9y11y12	373772	1934	187671048641265	147671048641265	0.1103	Green	15430	20750700	20750668	403693	1442	1442.00	2.21	2
29	NCDO2118_RS00205	aminotransferase A 39007:40182 forward MW:43199	Regular	6038817	0.49	431986822	18	4	30	9.97	13079	15712.5	4958	0	4	Pass2	PepFrag2	None	18629759	AVILNYPANPTGVTYNR	AVILNYPANPTGVTYNR	168	17	9.59	1329	0	0	0	0	1147955	48409	Missing	53	1.6	y12	259703	1724	173827229574288	758848197161917	0.0821	Red	5477	18629314	18629343	233819	1074	1074.00	3.00	3
29	NCDO2118_RS00205	aminotransferase A 39007:40182 forward MW:43199	Regular	4842177	0.7	431986822	25	9	30	20.97	23031	13807	7399	1	1	Pass1	PepFrag1	None	16178483	QFDQQVSSIPDIIK	QFDQQVSSIPDIIK	20	14	3.88	2036	8	8	3	0	111010500	67304	Identified	4153	3.6	b4*b5*b9b14y5y7y8y9y9y10y12y14	290902	1507	158916308824543	118916308824543	0.4774	Green	13002	16178480	16178481	285019	10996	10996.00	2.00	2
29	NCDO2118_RS00205	aminotransferase A 39007:40182 forward MW:43199	Regular	4842177	0.7	431986822	25	9	30	20.97	23031	13807	7399	0	2	Pass1	PepFrag1	None	6193484	MDLLK	MDLLK	0	5	6.78	2038	1	1	0	0	2644586	51074		94	1.2	b3b3	173576	598	858144500315464	131628900063093	0.0628	Yellow	10033	6193483	6193499	254016	1446	1446.00	1.00	1
29	NCDO2118_RS00205	aminotransferase A 39007:40182 forward MW:43199	Regular	4842177	0.7	431986822	25	9	30	20.97	23031	13807	7399	0	3	Pass1	PepFrag1	None	20750478	ANDFVLTPEMLEQAIVER	ANDFVLTPEMLEQAIVER	145	18	3.69	2037	5	5	0	0	14885100	58578	Identified	532	1.8	b5b11y9y10y11y12y13*y14y18	385507	1934	187671048641265	147671048641265	0.0593	Green	20874	20750530	20750489	404282	1365	1365.00	2.00	2
29	NCDO2118_RS00205	aminotransferase A 39007:40182 forward MW:43199	Regular	4842177	0.7	431986822	25	9	30	20.97	23031	13807	7399	0	4	Pass1	PepFrag1	None	7804138	DYIIEK	DYIIEK	300	6	4.07	2039	1	1	0	0	9664819	56702		448	1.1	y3y6	191172	724	974807087926016	154961417585203	0.0446	Green	3333	7804105	7804121	184392	1028	1028.00	1.00	1
29	NCDO2118_RS00205	aminotransferase A 39007:40182 forward MW:43199	Regular	4842177	0.7	431986822	25	9	30	20.97	23031	13807	7399	0	5	Pass2	MissedCleavage	None	26082456	LSYAASMDMIEQAMARLTDYVTK	LSYAASMDMIEQAMARLTDYVTK	365	23	4.31	2040	4	4	0	0	5239161	54043		917	1.9	b6b9y1y10y14*y23	313190	2419	217863033515024	10524202234335	0.0491	Yellow	15827	26082540	26082502	315516	1130	1130.00	3.22	3
29	NCDO2118_RS00205	aminotransferase A 39007:40182 forward MW:43199	Regular	4842177	0.7	431986822	25	9	30	20.97	23031	13807	7399	0	6	Pass2	VarMod	Phosphoryl STY(7)	24691731	ANDFVLTPEMLEQAIVEREGK	ANDFVLTPEMLEQAIVEREGK	145	21	4.00	2041	0	0	0	0	2828243	51366	Missing	291	2.3	b15y5y11b9-H3PO4y15-H3PO4	349417	2226	206115067482983	974100449886553	0.0964	Yellow	18251	24691749	24691728	349120	2220	2220.00	2.56	3
29	NCDO2118_RS00205	aminotransferase A 39007:40182 forward MW:43199	Regular	4842177	0.7	431986822	25	9	30	20.97	23031	13807	7399	0	7	Pass2	VarMod	Phosphoryl STY(16)	23421178	MSDLGFKIIEPDGAFYIFAK	MSDLGFKIIEPDGAFYIFAK	306	20	4.31	2044	2	2	0	0	1664307	49063	Missing	125	2.1	y9y16	414757	2120	199518670166049	930124467773661	0.0797	Red	19481	23421143	23421137	371032	1835	1835.00	2.62	3
29	NCDO2118_RS00205	aminotransferase A 39007:40182 forward MW:43199	Regular	4842177	0.7	431986822	25	9	30	20.97	23031	13807	7399	0	8	Pass2	VarMod	Oxidation M(*);Phosphoryl STY(*)	18837737	LSYAASMDMIEQAMAR	LSYAASMDMIEQAMAR	365	16	4.07	2043	2	2	0	0	4815013	53676		337	1.9	b5b6-H3PO4y4y6y7y10	273532	1637	16792889121334	719525941422269	0.0751	Yellow	11520	18837769	18837804	269052	1730	1730.00	2.61	3
29	NCDO2118_RS00205	aminotransferase A 39007:40182 forward MW:43199	Regular	4842177	0.7	431986822	25	9	30	20.97	23031	13807	7399	0	9	Pass2	VarMod	Phosphoryl STY(9)	15637494	IIEPDGAFYIFAK	IIEPDGAFYIFAK	313	13	4.07	2042	2	2	1	0	7528457	55617	Identified	502	1.6	y7y8y10	346242	1390	150580765645106	110580765645106	0.0556	Yellow	7603	15637472	15637477	231390	1281	1281.00	2.00	2
29	NCDO2118_RS00205	aminotransferase A 39007:40182 forward MW:43199	Regular	5631317	1.1	431986822	13	3	30	2.81	75633	120891	24001	1	1	Pass1	PepFrag1	None	12626263	IPADLEQDSFK	IPADLEQDSFK	326	11	3.70	1165	10	10	6	3	199729900	70511	Identified	17985	5.3	b2b3b4b6y3y5*y7y8y9y10y11	222452	1153	132936989368312	929369893683116	0.5328	Green	6868	12626239	12626260	207873	40297	40297.00	2.00	2
29	NCDO2118_RS00205	aminotransferase A 39007:40182 forward MW:43199	Regular	5631317	1.1	431986822	13	3	30	2.81	75633	120891	24001	0	2	Pass2	PepFrag2	None	10254721	QAASEFMNK	QAASEFMNK	73	9	7.00	1166	1	1	0	0	535136	44791		5097	3.8	b7y2*y9	150107	920	11436281910869	18872563821738	0.2646	Red	3671	10254618	10254626	172687	20016	20016.00	1.21	1
29	NCDO2118_RS00205	aminotransferase A 39007:40182 forward MW:43199	Regular	5631317	1.1	431986822	13	3	30	2.81	75633	120891	24001	0	3	Pass2	VarMod	Phosphoryl STY(10)	18258408	LTLGEPDFYTPEHVK	LTLGEPDFYTPEHVK	34	15	4.42	1167	2	2	0	0	1026610	47620	Missing	919	4.1	b9y11-H3PO4y15	241116	1605	165733254506207	125733254506207	0.2026	Red	13479	18258538	18258542	307550	15320	15320.00	2.09	2
29	NCDO2118_RS00205	aminotransferase A 39007:40182 forward MW:43199	Regular	1107674	2.54	431986822	10	5	30	8.95	13951	10737	2051	1	1	Pass1	PepFrag1	None	10254721	QAASEFMNK	QAASEFMNK	73	9	7.00	2447	2	2	0	0	2909627	45083		426	2.7	b9y5y9	156509	920	11436281910869	18872563821738	0.5488	Red	1342	10254736	10254747	149306	7657	7657.00	1.38	1
29	NCDO2118_RS00205	aminotransferase A 39007:40182 forward MW:43199	Regular	1107674	2.54	431986822	10	5	30	8.95	13951	10737	2051	0	2	Pass1	PepFrag1	None	12626263	IPADLEQDSFK	IPADLEQDSFK	326	11	3.70	2445	5	5	3	0	29103140	55084	Identified	1343	1.8	b7*b8b8y8y9y10y11	231219	1153	132936989368312	929369893683116	0.1427	Green	5647	12626251	12626279	208170	1991	1991.00	2.00	2
29	NCDO2118_RS00205	aminotransferase A 39007:40182 forward MW:43199	Regular	1107674	2.54	431986822	10	5	30	8.95	13951	10737	2051	0	3	Pass1	PepFrag1	None	17458745	LTLGEPDFYTPEHVK	LTLGEPDFYTPEHVK	34	15	4.42	2446	2	2	0	0	4393874	46873	Missing	189	1.6	y4y15	257754	1605	165733254506207	125733254506207	0.0781	Red	9161	17458643	17458641	248917	1089	1089.00	2.00	2
29	NCDO2118_RS00205	aminotransferase A 39007:40182 forward MW:43199	Regular	1107674	2.54	431986822	10	5	30	8.95	13951	10737	2051	0	4	Pass2	PepFrag2	None	22081448	ENAVAIIPGIAFGQYGEGFVR	ENAVAIIPGIAFGQYGEGFVR	344	21	4.26	2449	0	0	0	0	993877	40417	Missing	50	1.9	y13	369385	2052	195229093835235	155229093835235	0.0964	Red	13838	22081029	22080978	337854	1345	1345.00	2.00	2
29	NCDO2118_RS00205	aminotransferase A 39007:40182 forward MW:43199	Regular	1107674	2.54	431986822	10	5	30	8.95	13951	10737	2051	0	5	Pass2	VarMod	Phosphoryl STY(14)	26372490	QAGIAAIENNQSHYTGMAGLLELR	QAGIAAIENNQSHYTGMAGLLELR	49	24	5.30	2448	1	1	0	0	913317	40050		43	2.3	y10	314813	2367	214729546132035	673647730660177	0.1340	Red	5973	26372433	26372433	211596	1869	1869.00	3.68	4
29	NCDO2118_RS00205	aminotransferase A 39007:40182 forward MW:43199	Regular	1784553	2.86	431986822	13	7	30	15.09	198443	185395	9328	1	1	Pass1	PepFrag1	None	8474308	FNPNLDK	FNPNLDK	6	7	6.78	3189	2	2	0	0	9431426	52261	Identified	4385	6.0	b7b7*y5y7*	137565	767	101303210716176	162606421432352	0.8385	Yellow	2672	8474248	8474266	159590	166388	166388.00	1.06	1
29	NCDO2118_RS00205	aminotransferase A 39007:40182 forward MW:43199	Regular	1784553	2.86	431986822	13	7	30	15.09	198443	185395	9328	0	2	Pass1	PepFrag1	None	11595776	NGADDALPMKK	NGADDALPMKK	283	11	6.89	3191	0	0	0	0	2002269	45531	Missing	48	3.4	y8	156002	1068	126320490295024	863204902950241	0.0595	Red	3352	11595717	11595748	166368	11798	11798.00	2.00	2
29	NCDO2118_RS00205	aminotransferase A 39007:40182 forward MW:43199	Regular	1784553	2.86	431986822	13	7	30	15.09	198443	185395	9328	0	3	Pass1	PepFrag1	None	12626263	IPADLEQDSFK	IPADLEQDSFK	326	11	3.70	3188	5	5	3	1	49234630	59438	Identified	3027	2.8	b2b3y9y9y10y11	227031	1153	132936989368312	929369893683116	0.0363	Green	7987	12626246	12626275	207180	7209	7209.00	2.00	2
29	NCDO2118_RS00205	aminotransferase A 39007:40182 forward MW:43199	Regular	1784553	2.86	431986822	13	7	30	15.09	198443	185395	9328	0	4	Pass1	PepFrag1	None	10254721	QAASEFMNK	QAASEFMNK	73	9	7.00	3190	0	0	0	0	2687558	46809		48	1.6	y7	149327	920	11436281910869	743628191086898	0.0089	Red	2231	10254701	10254734	154409	1775	1775.00	2.00	2
29	NCDO2118_RS00205	aminotransferase A 39007:40182 forward MW:43199	Regular	1784553	2.86	431986822	13	7	30	15.09	198443	185395	9328	0	5	Pass1	PepFrag1	None	22081448	ENAVAIIPGIAFGQYGEGFVR	ENAVAIIPGIAFGQYGEGFVR	344	21	4.26	3192	1	1	0	0	717494	41073	Missing	66	2.0	b9y10	369353	2052	195229093835235	9015272922349	0.0076	Red	19283	22081290	22081294	349480	1512	1512.00	3.00	3
29	NCDO2118_RS00205	aminotransferase A 39007:40182 forward MW:43199	Regular	1784553	2.86	431986822	13	7	30	15.09	198443	185395	9328	0	6	Pass2	PepFrag2	None	7804138	DYIIEK	DYIIEK	300	6	4.07	3194	3	3	1	0	1199762	43306		1638	2.4	b3b5b5b6y6	179473	724	974807087926016	154961417585203	0.0431	Red	10710	7803883	7803901	228914	8546	8546.00	1.00	1
29	NCDO2118_RS00205	aminotransferase A 39007:40182 forward MW:43199	Regular	1784553	2.86	431986822	13	7	30	15.09	198443	185395	9328	0	7	Pass2	PepFrag2	None	17458745	LTLGEPDFYTPEHVK	LTLGEPDFYTPEHVK	34	15	4.42	3193	2	2	0	0	1445370	44115	Identified	116	1.6	b9y10y13	257497	1605	165733254506207	125733254506207	0.0061	Red	18370	17458330	17458339	325469	1215	1215.00	2.00	2
29	NCDO2118_RS00205	aminotransferase A 39007:40182 forward MW:43199	Regular	2949814	3.88	431986822	9	5	30	18.67	257258	2770.5	141034	1	1	Pass1	PepFrag1	None	14837831	IIEPDGAFYIFAK	IIEPDGAFYIFAK	313	13	4.07	1376	2	2	0	0	7715242	53571	Identified	738	1.5	b2b8b11b13y10	353867	1390	150580765645106	110580765645106	0.0042	Yellow	15272	14837874	14837891	347851	1079	1079.00	2.00	2
29	NCDO2118_RS00205	aminotransferase A 39007:40182 forward MW:43199	Regular	2949814	3.88	431986822	9	5	30	18.67	257258	2770.5	141034	0	2	Pass1	PepFrag1	None	22081448	ENAVAIIPGIAFGQYGEGFVR	ENAVAIIPGIAFGQYGEGFVR	344	21	4.26	1377	3	3	1	1	49768900	61668	Identified	234	1.6	b6b7y14	399109	2052	195229093835235	155229093835235	0.0030	Green	19830	22081458	22081438	384807	768	768.00	2.00	2
29	NCDO2118_RS00205	aminotransferase A 39007:40182 forward MW:43199	Regular	2949814	3.88	431986822	9	5	30	18.67	257258	2770.5	141034	0	3	Pass2	PepFrag2	None	16178483	QFDQQVSSIPDIIK	QFDQQVSSIPDIIK	20	14	3.88	1378	0	0	0	0	566577	42231	Missing	34	2.3	b12*	274524	1507	158916308824543	118916308824543	0.0123	Red	22548	16178301	16178313	411969	3161	3161.00	2.00	2
29	NCDO2118_RS00205	aminotransferase A 39007:40182 forward MW:43199	Regular	2949814	3.88	431986822	9	5	30	18.67	257258	2770.5	141034	0	4	Pass2	MissedCleavage	None	34066947	THQYLVTSASTQSQFAAIEALKNGADDALPMK	THQYLVTSASTQSQFAAIEALKNGADDALPMK	261	32	5.28	1379	0	0	0	0	4167108	50896	Missing	3012	4.3	b1b6*b12b22y11*y17y28*	356534	3156	26012632011068	900631600553402	0.0311	Yellow	17210	34066891	34066891	363019	7991	7991.00	3.79	4
29	NCDO2118_RS00205	aminotransferase A 39007:40182 forward MW:43199	Regular	2949814	3.88	431986822	9	5	30	18.67	257258	2770.5	141034	0	5	Pass2	VarMod	Oxidation M(1)	22781464	MSDLGFKIIEPDGAFYIFAK	MSDLGFKIIEPDGAFYIFAK	306	20	4.31	1380	4	4	2	0	7756419	53595	Identified	137016	12.6	b10b11y19y20	448712	2120	199518670166049	159518670166049	0.9495	Yellow	10154	22781484	22781459	309207	244259	244259.00	2.41	2
31	NCDO2118_RS00215	dihydrolipoamide dehydrogenase 41393:42811 reverse MW:49867	Regular	17062530	0	499809479	44	8	32	14.41	180374	165949	74399	1	1	Pass1	PepFrag1	None	10485092	EMSDIIANR	EMSDIIANR	222	9	4.07	750	12	12	9	4	626800100	80292		49032	6.3	b2b2b3b3b4b4b5b5b6y2y2*y3y3*y4y4*y5y6*y7y7*y8y9y9*	188225	956	117327071037588	773270710375882	0.4510	Green	6212	10485039	10485071	181469	81354	81354.00	1.90	2
31	NCDO2118_RS00215	dihydrolipoamide dehydrogenase 41393:42811 reverse MW:49867	Regular	17062530	0	499809479	44	8	32	14.41	180374	165949	74399	0	2	Pass1	PepFrag1	None	7024396	VTIIEK	VTIIEK	34	6	7.00	754	11	11	9	4	241742700	76154		20779	4.0	b2b2b3b3b4b4b5b6y1y2y2y3y4y5y6	151083	690	944044271688475	148808854337695	0.3791	Green	2690	7024397	7024423	148790	68374	68374.00	1.00	1
31	NCDO2118_RS00215	dihydrolipoamide dehydrogenase 41393:42811 reverse MW:49867	Regular	17062530	0	499809479	44	8	32	14.41	180374	165949	74399	0	3	Pass1	PepFrag1	None	19549604	SATQTDKDVTLTFEVDGK	SATQTDKDVTLTFEVDGK	246	18	3.97	753	13	13	6	2	47652280	69101		1854	4.5	b7b7b8*b12b14y1y3y4y5y6y6y7y7y8y9y13y18	229069	1795	178567575816541	790450505443604	0.0899	Green	13299	19549558	19549583	240062	16221	16221.00	2.52	3
31	NCDO2118_RS00215	dihydrolipoamide dehydrogenase 41393:42811 reverse MW:49867	Regular	17062530	0	499809479	44	8	32	14.41	180374	165949	74399	0	4	Pass1	PepFrag1	None	12996249	SAGSEIFTSAMAK	SAGSEIFTSAMAK	233	13	7.00	751	1	1	0	0	695207	50742		845	1.5	y9y13	209351	1188	135613813291255	956138132912545	0.0064	Yellow	6638	12996175	12996206	184963	1163	1163.00	2.00	2
31	NCDO2118_RS00215	dihydrolipoamide dehydrogenase 41393:42811 reverse MW:49867	Regular	17062530	0	499809479	44	8	32	14.41	180374	165949	74399	0	5	Pass1	PepFrag1	None	13256518	AISMNDTTGFLR	AISMNDTTGFLR	392	12	7.00	752	3	3	1	0	6926942	60726		783	1.5	b5*b9b11y1y2y8y8*y8	242103	1216	1377363861906	977363861906001	0.0060	Green	12853	13256498	13256528	235048	1083	1083.00	2.00	2
31	NCDO2118_RS00215	dihydrolipoamide dehydrogenase 41393:42811 reverse MW:49867	Regular	17062530	0	499809479	44	8	32	14.41	180374	165949	74399	0	6	Pass2	PepFrag2	None	9754894	LNWESAQK	LNWESAQK	86	8	7.00	755	1	1	0	0	1236728	53243		94	2.5	y6	141091	881	111107550495296	711075504952956	0.0418	Yellow	2486	9754759	9754791	145497	7534	7534.00	2.00	2
31	NCDO2118_RS00215	dihydrolipoamide dehydrogenase 41393:42811 reverse MW:49867	Regular	17062530	0	499809479	44	8	32	14.41	180374	165949	74399	0	7	Pass2	PepFrag2	None	8794472	FPFAANGR	FPFAANGR	384	8	11.05	757	1	1	0	0	257469	46428	Missing	33	1.2	y6	166877	786	102969356396621	62969356396621	0.0052	Red	10539	8794557	8794588	215059	934	934.00	2.00	2
31	NCDO2118_RS00215	dihydrolipoamide dehydrogenase 41393:42811 reverse MW:49867	Regular	17062530	0	499809479	44	8	32	14.41	180374	165949	74399	0	8	Pass2	MissedCleavage	None	15267883	VKSAGSEIFTSAMAK	VKSAGSEIFTSAMAK	231	15	9.88	756	2	2	0	0	19048240	65119		979	2.5	y7y15	193541	1428	153312808395605	113312808395605	0.0206	Green	5668	15267891	15267917	177598	3711	3711.00	2.00	2
31	NCDO2118_RS00215	dihydrolipoamide dehydrogenase 41393:42811 reverse MW:49867	Regular	6816602	0	499809479	37	10	32	16.95	162232	127354	98886	1	1	Pass1	PepFrag1	None	10485092	EMSDIIANR	EMSDIIANR	222	9	4.07	1948	12	12	8	3	315048200	73319		83016	6.8	b2b2b3b3b4b4b5b9y1y2y2*y3y3*y4y4*y5y5*y6y7y9	184016	956	117327071037588	773270710375882	0.6125	Green	4848	10485136	10485168	180728	99370	99370.00	1.91	2
31	NCDO2118_RS00215	dihydrolipoamide dehydrogenase 41393:42811 reverse MW:49867	Regular	6816602	0	499809479	37	10	32	16.95	162232	127354	98886	0	2	Pass1	PepFrag1	None	9754894	LNWESAQK	LNWESAQK	86	8	7.00	1952	1	1	0	0	2585187	52461		221	1.5	b8y4	139656	881	111107550495296	711075504952956	0.0117	Yellow	1690	9754852	9754885	144859	1904	1904.00	2.00	2
31	NCDO2118_RS00215	dihydrolipoamide dehydrogenase 41393:42811 reverse MW:49867	Regular	6816602	0	499809479	37	10	32	16.95	162232	127354	98886	0	3	Pass1	PepFrag1	None	7024396	VTIIEK	VTIIEK	34	6	7.00	1950	2	2	1	0	5458529	55706		200	1.3	b3y2y3	153510	690	944044271688475	148808854337695	0.0109	Yellow	1861	7024375	7024393	147957	1770	1770.00	1.00	1
31	NCDO2118_RS00215	dihydrolipoamide dehydrogenase 41393:42811 reverse MW:49867	Regular	6816602	0	499809479	37	10	32	16.95	162232	127354	98886	0	4	Pass1	PepFrag1	None	12236154	DVTLTFEVDGK	DVTLTFEVDGK	253	11	3.70	1949	3	3	0	0	6301418	56330		198	1.4	b11y2y6y9	249729	1129	131085783888653	91085783888653	0.0060	Green	11075	12236147	12236177	232288	981	981.00	2.00	2
31	NCDO2118_RS00215	dihydrolipoamide dehydrogenase 41393:42811 reverse MW:49867	Regular	6816602	0	499809479	37	10	32	16.95	162232	127354	98886	0	5	Pass1	PepFrag1	None	19549604	SATQTDKDVTLTFEVDGK	SATQTDKDVTLTFEVDGK	246	18	3.97	1953	4	4	1	0	2753698	52735		357	1.6	b2b7*b10y6y7	236048	1795	178567575816541	790450505443604	0.0059	Yellow	11914	19549514	19549534	240618	954	954.00	3.00	3
31	NCDO2118_RS00215	dihydrolipoamide dehydrogenase 41393:42811 reverse MW:49867	Regular	6816602	0	499809479	37	10	32	16.95	162232	127354	98886	0	6	Pass2	PepFrag2	None	8794472	FPFAANGR	FPFAANGR	384	8	11.05	1957	2	2	0	0	12159970	59185	Identified	1145	3.9	b8y7y8*	164863	786	102969356396621	165938712793242	0.1539	Green	3872	8794693	8794710	171588	24967	24967.00	1.00	1
31	NCDO2118_RS00215	dihydrolipoamide dehydrogenase 41393:42811 reverse MW:49867	Regular	6816602	0	499809479	37	10	32	16.95	162232	127354	98886	0	7	Pass2	PepFrag2	Carbamidomethyl C(7);Carbamidomethyl C(12)	17028252	DNVGGVCLNIGCIPSK	DNVGGVCLNIGCIPSK	40	16	5.96	1951	0	0	0	0	7025530	56802	Identified	166	2.3	y3	235248	1479	156941723222252	116941723222252	0.0186	Green	9435	17028092	17028104	218848	3017	3017.00	2.00	2
31	NCDO2118_RS00215	dihydrolipoamide dehydrogenase 41393:42811 reverse MW:49867	Regular	6816602	0	499809479	37	10	32	16.95	162232	127354	98886	0	8	Pass2	MissedCleavage	None	12756725	EMSDIIANRVK	EMSDIIANRVK	222	11	7.03	1954	1	1	0	0	2181156	51723		42	2.1	b3	190096	1196	136221948254149	962219482541493	0.0189	Yellow	6169	12756708	12756737	192171	3064	3064.00	2.00	2
31	NCDO2118_RS00215	dihydrolipoamide dehydrogenase 41393:42811 reverse MW:49867	Regular	6816602	0	499809479	37	10	32	16.95	162232	127354	98886	0	9	Pass2	MissedCleavage	None	15267883	VKSAGSEIFTSAMAK	VKSAGSEIFTSAMAK	231	15	9.88	1955	3	3	0	1	12194100	59197		733	2.2	b8y7y15	219504	1428	153312808395605	113312808395605	0.0168	Green	4387	15267878	15267898	176831	2730	2730.00	2.00	2
31	NCDO2118_RS00215	dihydrolipoamide dehydrogenase 41393:42811 reverse MW:49867	Regular	6816602	0	499809479	37	10	32	16.95	162232	127354	98886	0	10	Pass2	VarMod	Oxidation M(2)	10645041	EMSDIIANR	EMSDIIANR	222	9	4.07	1956	3	3	1	0	8928806	57844		419	1.6	b4y3y4y7	184016	956	117327071037588	773270710375882	0.0118	Green	1431	10645059	10645091	139515	1911	1911.00	2.00	2
31	NCDO2118_RS00215	dihydrolipoamide dehydrogenase 41393:42811 reverse MW:49867	Regular	6816602	0	499809479	37	10	32	16.95	162232	127354	98886	0	11	Pass2	InSource	None	7884261	SDIIANR	EMSDIIANR	224	7	7.00	1948	6	6	2	1	47257070	0.0000		12290	0.0	b3b5b7y3y3*y4y5y7	184016	723	973909268746553	154781853749311	0.1211	Green	4846	7884249	7884267	180694	19649	19649.00	1.05	1
31	NCDO2118_RS00215	dihydrolipoamide dehydrogenase 41393:42811 reverse MW:49867	Regular	6816602	0	499809479	37	10	32	16.95	162232	127354	98886	0	12	Pass2	InSource	None	5582228	EMSDI	EMSDIIANR	222	5	3.01	1948	0	0	0	0	686935	0.0000		99	0.0	b2b3	184016	521	782801140493743	116560228098749	0.0118	Green	4845	5582212	5582230	180681	1915	1915.00	1.00	1
31	NCDO2118_RS00215	dihydrolipoamide dehydrogenase 41393:42811 reverse MW:49867	Regular	5529401	0	499809479	32	7	32	16.95	66792	49247	10571	1	1	Pass1	PepFrag1	None	10145942	VVNQLTGGVK	VVNQLTGGVK	99	10	10.10	2550	3	3	0	1	9466627	57189		1468	4.4	b6y4y10	157125	973	118713887700363	787138877003631	0.4201	Green	3667	10145915	10145943	193717	28059	28059.00	1.90	2
31	NCDO2118_RS00215	dihydrolipoamide dehydrogenase 41393:42811 reverse MW:49867	Regular	5529401	0	499809479	32	7	32	16.95	66792	49247	10571	0	2	Pass1	PepFrag1	None	39660230	VAAAAIAGAEDDVDLHVALPAVAYTTTELATVGETPESVK	VAAAAIAGAEDDVDLHVALPAVAYTTTELATVGETPESVK	335	40	3.68	2549	15	15	9	0	33699190	62703	Identified	2069	5.1	b4b5b6b13b16b17y5y6y7y8y9y10y11y12y13y22y40	353140	3713	289896474399621	104948237199811	0.1552	Green	21066	39660271	39660271	394563	10364	10364.00	3.90	4
31	NCDO2118_RS00215	dihydrolipoamide dehydrogenase 41393:42811 reverse MW:49867	Regular	5529401	0	499809479	32	7	32	16.95	66792	49247	10571	0	3	Pass1	PepFrag1	None	10485092	EMSDIIANR	EMSDIIANR	222	9	4.07	2547	4	4	3	0	51891540	64578		1509	2.7	b4y3y4y5y6	185889	956	117327071037588	773270710375882	0.1218	Green	2641	10485085	10485113	181311	8137	8137.00	2.00	2
31	NCDO2118_RS00215	dihydrolipoamide dehydrogenase 41393:42811 reverse MW:49867	Regular	5529401	0	499809479	32	7	32	16.95	66792	49247	10571	0	4	Pass1	PepFrag1	None	12996249	SAGSEIFTSAMAK	SAGSEIFTSAMAK	233	13	7.00	2548	5	5	2	1	43797710	63841		1245	2.2	b5b5b6y7y8y9y11	222850	1188	135613813291255	956138132912545	0.0496	Green	7491	12996243	12996266	231240	3314	3314.00	2.00	2
31	NCDO2118_RS00215	dihydrolipoamide dehydrogenase 41393:42811 reverse MW:49867	Regular	5529401	0	499809479	32	7	32	16.95	66792	49247	10571	0	5	Pass2	PepFrag2	None	8794472	FPFAANGR	FPFAANGR	384	8	11.05	2552	3	3	1	0	14775340	59122	Identified	3871	2.9	b7y5*y7y8	166324	786	102969356396621	165938712793242	0.1621	Green	7023	8794595	8794611	227232	10824	10824.00	1.11	1
31	NCDO2118_RS00215	dihydrolipoamide dehydrogenase 41393:42811 reverse MW:49867	Regular	5529401	0	499809479	32	7	32	16.95	66792	49247	10571	0	6	Pass2	PepFrag2	None	15398629	IIDSTGALSLPEVPK	IIDSTGALSLPEVPK	167	15	4.07	2553	1	1	0	0	843110	46686	Missing	239	2.8	b8	275875	1470	1563043953304	1163043953304	0.0753	Red	14746	15398915	15398929	299652	5030	5030.00	2.00	2
31	NCDO2118_RS00215	dihydrolipoamide dehydrogenase 41393:42811 reverse MW:49867	Regular	5529401	0	499809479	32	7	32	16.95	66792	49247	10571	0	7	Pass2	VarMod	Phosphoryl STY(*)	20349267	SATQTDKDVTLTFEVDGK	SATQTDKDVTLTFEVDGK	246	18	3.97	2551	1	1	0	0	570361	44988		170	1.7	b13*y8	233852	1795	178567575816541	138567575816541	0.0159	Red	11500	20349170	20349155	267453	1064	1064.00	2.00	2
31	NCDO2118_RS00215	dihydrolipoamide dehydrogenase 41393:42811 reverse MW:49867	Regular	30776930	0	499809479	70	12	32	43.64	532042	460156	266943	1	1	Pass1	PepFrag1	None	15398629	IIDSTGALSLPEVPK	IIDSTGALSLPEVPK	167	15	4.07	2011	24	24	19	9	648624700	83002	Identified	235578	13.8	b3b4b4b5b5b6b7b7b9b9b10b11b12b12b13b15y2y3y4y5y6y7y8y9y9y10y10y11y12y12y13y14y15	278436	1470	1563043953304	1163043953304	0.7860	Green	17035	15398573	15398591	276063	418202	418202.00	1.99	2
31	NCDO2118_RS00215	dihydrolipoamide dehydrogenase 41393:42811 reverse MW:49867	Regular	30776930	0	499809479	70	12	32	43.64	532042	460156	266943	0	2	Pass1	PepFrag1	None	24983613	VVGAQATEVDLVVIGSGPGGYVAAIR	VVGAQATEVDLVVIGSGPGGYVAAIR	1	26	4.07	2012	21	21	9	3	172724100	77256	Identified	13829	6.4	b3b8b8*b9b10b10b12b13b14b15b16b16b17*b18b20b24b26y4y7y9y12y13y14y15y26	368283	2369	214850486460521	103233657640347	0.0553	Green	34746	24983603	24983583	346334	29430	29430.00	2.61	3
31	NCDO2118_RS00215	dihydrolipoamide dehydrogenase 41393:42811 reverse MW:49867	Regular	30776930	0	499809479	70	12	32	43.64	532042	460156	266943	0	3	Pass1	PepFrag1	None	32916718	GLIEVDDSYATNVPHIYAIGDVVPGPMLAHK	GLIEVDDSYATNVPHIYAIGDVVPGPMLAHK	298	31	4.42	2013	2	2	0	0	6368077	62922	Identified	2940	5.0	b4b16b19*y8y25	403367	3076	255711654155966	878558270779829	0.0235	Green	35769	32916747	32916723	350911	12524	12524.00	4.00	4
31	NCDO2118_RS00215	dihydrolipoamide dehydrogenase 41393:42811 reverse MW:49867	Regular	30776930	0	499809479	70	12	32	43.64	532042	460156	266943	0	4	Pass1	PepFrag1	None	12996249	SAGSEIFTSAMAK	SAGSEIFTSAMAK	233	13	7.00	2016	1	1	0	0	1365380	56235		88	2.4	y9	254506	1188	135613813291255	956138132912545	0.0074	Yellow	5650	12996174	12996200	221508	3931	3931.00	2.00	2
[truncated: 39,326 more rows]
[truncated: 11 more columns]
