# Supplementary material for: Quantitative Proteomic Analysis of the Response of Probiotic Putative Lactococcus lactis NCDO 2118 Strain to Different Oxygen Availability Under Temperature Variation
Source: Front Microbiol. 2019 Apr 11;10:759. doi: 10.3389/fmicb.2019.00759 (PMC6470185; doi:10.3389/fmicb.2019.00759)
Supplement: FILE S4 (TABLE 3) — Total list of peptide and proteins identified in AN condition. [file Table_3.xlsx]

## Sheet: Plan1
Table 3: Total list of peptide and proteins identified in AN condition.
protein.key	protein.Accession	protein.Description	protein.dataBaseType	protein.score	protein.falsePositiveRate	protein.avgMass	protein.MatchedProducts	protein.matchedPeptides	protein.digestPeps	protein.seqCover(%)	protein.MatchedPeptideIntenSum	protein.top3MatchedPeptideIntenSum	protein.MatchedProductIntenSum	protein.SumForTotalProteins	peptide.Rank	peptide.Pass	peptide.matchType	peptide.modification	peptide.mhp	peptide.seq	peptide.OriginatingSeq	peptide.seqStart	peptide.seqLength	peptide.pI	peptide.componentID	peptide.MatchedProducts	peptide.UniqueProducts	peptide.ConsectiveMatchedProducts	peptide.ComplementaryMatchedProducts	peptide.rawScore	peptide.score	peptide.(X)-P Bond	peptide.MatchedProductsSumInten	peptide.MatchedProductsTheoretical	peptide.MatchedProductsString	peptide.ModelRT	peptide.Volume	peptide.CSA	peptide.ModelDrift	peptide.RelIntensity	peptide.AutoCurate	precursor.leID	precursor.mhp	precursor.mhpCal	precursor.retT	precursor.inten	precursor.calcInten	precursor.charge	precursor.z
1362	NCDO2118_RS07185	pyruvate kinase 1499467:1500975 reverse MW:54255	Regular	179586000	0	543119936	291	28	33	65.14	2682813	1435874	1396393	0	35	Pass2	InSource	None	5492780	YNPR	IVVTATNMLESMTYNPR	315	4	9.84	148	3	3	1	0	3230724	0.0000	Identified	1745	0.0	b2b3y4	302339	475	736018460525308	107203692105062	0.0014	Green	26676	5492778	5492800	313498	3850	3850.00	1.00	1
1362	NCDO2118_RS07185	pyruvate kinase 1499467:1500975 reverse MW:54255	Regular	179586000	0	543119936	291	28	33	65.14	2682813	1435874	1396393	0	36	Pass2	InSource	None	5863307	PVGTGR	VALASGLVESGDNIIIVAGVPVGTGR	486	6	11.05	150	0	0	0	0	462835	0.0000	Missing	0	0.0		391814	532	793781042037651	11875620840753	0.0013	Green	37977	5863265	5863288	360605	3523	3523.00	1.00	1
1362	NCDO2118_RS07185	pyruvate kinase 1499467:1500975 reverse MW:54255	Regular	179586000	0	543119936	291	28	33	65.14	2682813	1435874	1396393	0	37	Pass2	InSource	None	6633573	GANVFR	NIAALIEEGANVFR	48	6	11.05	153	2	2	0	0	1172745	0.0000		1438	0.0	y2y6	352322	599	85910091671144	131820183342288	0.0009	Green	45075	6633533	6633557	395898	2543	2543.00	1.00	1
1362	NCDO2118_RS07185	pyruvate kinase 1499467:1500975 reverse MW:54255	Regular	179586000	0	543119936	291	28	33	65.14	2682813	1435874	1396393	0	38	Pass2	InSource	None	8304441	IVVTATNM	IVVTATNMLESMTYNPR	302	8	6.13	148	0	0	0	0	4335860	0.0000		263	0.0	b8*y5y6	302339	807	104795344739875	16959068947975	0.0009	Green	26681	8304397	8304420	313505	2416	2416.00	1.00	1
1362	NCDO2118_RS07185	pyruvate kinase 1499467:1500975 reverse MW:54255	Regular	179586000	0	543119936	291	28	33	65.14	2682813	1435874	1396393	0	39	Pass2	InSource	None	8714495	GLMINWGV	GLMINWGVIPTMTEKPSSTDDMFEVAEKVALASGLVESGDNIIIVAGVPVGTGR	438	8	6.13	169	1	1	0	0	2281995	0.0000		182	0.0	b3b8*	394937	832	106948619995804	173897239991608	0.0006	Green	43810	8714454	8714477	388473	1714	1714.00	1.00	1
1362	NCDO2118_RS07185	pyruvate kinase 1499467:1500975 reverse MW:54255	Regular	179586000	0	543119936	291	28	33	65.14	2682813	1435874	1396393	0	40	Pass2	InSource	None	9125261	VAGVPVGTGR	VALASGLVESGDNIIIVAGVPVGTGR	482	10	11.05	150	2	2	0	0	18134990	0.0000	Identified	1094	0.0	y6y10	391814	857	109080431890802	178160863781604	0.0006	Green	37997	9125222	9125245	360688	1520	1520.00	1.00	1
1362	NCDO2118_RS07185	pyruvate kinase 1499467:1500975 reverse MW:54255	Regular	179586000	0	543119936	291	28	33	65.14	2682813	1435874	1396393	0	41	Pass2	InSource	None	4172496	VGFL	VGFLLDTK	82	4	6.13	147	1	1	0	0	251087	0.0000		36	0.0	b2	238152	412	669408328781834	938816657563668	0.0006	Green	10746	4172493	4172512	250304	1506	1506.00	1.00	1
1362	NCDO2118_RS07185	pyruvate kinase 1499467:1500975 reverse MW:54255	Regular	179586000	0	543119936	291	28	33	65.14	2682813	1435874	1396393	0	42	Pass2	InSource	None	7923999	EGANVFR	NIAALIEEGANVFR	47	7	7.00	153	1	1	0	0	4270198	0.0000		107	0.0	y6	352322	708	960391864878618	152078372975724	0.0005	Green	45076	7923964	7923988	395924	1388	1388.00	1.00	1
1362	NCDO2118_RS07185	pyruvate kinase 1499467:1500975 reverse MW:54255	Regular	179586000	0	543119936	291	28	33	65.14	2682813	1435874	1396393	0	43	Pass2	InSource	None	5853606	LGLSLT	LGLSLTGK	155	6	6.13	143	0	0	0	0	349175	0.0000		0	0.0		158068	586	846625564537901	12932511290758	0.0005	Green	3505	5853591	5853613	204605	1380	1380.00	1.00	1
1362	NCDO2118_RS07185	pyruvate kinase 1499467:1500975 reverse MW:54255	Regular	179586000	0	543119936	291	28	33	65.14	2682813	1435874	1396393	0	44	Pass2	InSource	None	5352987	NVFR	NIAALIEEGANVFR	50	4	11.05	153	0	0	0	0	169155	0.0000		0	0.0		352322	484	74528642116772	109057284233544	0.0005	Green	45152	5352945	5352967	396731	1245	1245.00	1.00	1
1362	NCDO2118_RS07185	pyruvate kinase 1499467:1500975 reverse MW:54255	Regular	59250460	0	543119936	115	16	33	44.42	208761	134607	69732	1	1	Pass1	PepFrag1	None	24643770	VALASGLVESGDNIIIVAGVPVGTGR	VALASGLVESGDNIIIVAGVPVGTGR	466	26	4.07	140	33	33	25	12	670539000	85991	Identified	39564	10.0	b2b3b4b5b5b6b7b7b8b9b10b12b13b13b14b14b15b15b16b17b18b19b20b26y4y6y7y8y9y10y11y12y14y16y17y18y19y26	397881	2359	214245443756502	102830295837668	0.4819	Green	9815	24643865	24643833	369450	100602	100602.00	2.84	3
1362	NCDO2118_RS07185	pyruvate kinase 1499467:1500975 reverse MW:54255	Regular	59250460	0	543119936	115	16	33	44.42	208761	134607	69732	0	2	Pass1	PepFrag1	None	19399616	IVVTATNMLESMTYNPR	IVVTATNMLESMTYNPR	302	17	7.00	139	17	17	10	3	310821400	82652	Identified	2923	4.3	b2b3b4b5b6b7b7b8b10y2y3y4y5y6y7y8y10y12y13y17	335565	1805	179230165172554	139230165172554	0.0730	Green	8933	19399625	19399609	324927	15231	15231.00	2.36	2
1362	NCDO2118_RS07185	pyruvate kinase 1499467:1500975 reverse MW:54255	Regular	59250460	0	543119936	115	16	33	44.42	208761	134607	69732	0	3	Pass1	PepFrag1	None	7043210	DDADIR	DDADIR	201	6	3.59	146	7	7	2	2	39274460	73668		6638	2.9	b2b4b6y2y4y5y6	78395	612	871486336156241	134297267231248	0.0685	Green	895	7043211	7043229	101168	14290	14290.00	1.00	1
1362	NCDO2118_RS07185	pyruvate kinase 1499467:1500975 reverse MW:54255	Regular	59250460	0	543119936	115	16	33	44.42	208761	134607	69732	0	4	Pass1	PepFrag1	None	13447482	LIVALTESGNTAR	LIVALTESGNTAR	403	13	7.00	136	12	12	9	4	310030200	82641		4575	3.6	b2b3b4b5b13y5y6y7y8y9y9y10y11y11	244058	1271	141858926121739	101858926121739	0.0596	Green	7010	13447437	13447449	232478	12437	12437.00	2.00	2
1362	NCDO2118_RS07185	pyruvate kinase 1499467:1500975 reverse MW:54255	Regular	59250460	0	543119936	115	16	33	44.42	208761	134607	69732	0	5	Pass1	PepFrag1	Carbamidomethyl C(2)	17088687	ICEETGNPHVQLLAK	ICEETGNPHVQLLAK	235	15	5.30	135	6	6	1	0	14163000	69238	Identified	1987	3.8	y1y5y8y12y13y14y14*y15	222897	1542	161367430379895	6757828691993	0.0583	Yellow	6364	17088618	17088647	204364	12173	12173.00	2.88	3
1362	NCDO2118_RS07185	pyruvate kinase 1499467:1500975 reverse MW:54255	Regular	59250460	0	543119936	115	16	33	44.42	208761	134607	69732	0	6	Pass1	PepFrag1	None	8925138	VGFLLDTK	VGFLLDTK	82	8	6.78	138	5	5	4	0	59934440	75504		888	1.9	y4y5y6y7y8	274310	855	108910656856658	689106568566584	0.0162	Green	7671	8925098	8925118	266365	3388	3388.00	1.84	2
1362	NCDO2118_RS07185	pyruvate kinase 1499467:1500975 reverse MW:54255	Regular	59250460	0	543119936	115	16	33	44.42	208761	134607	69732	0	7	Pass1	PepFrag1	None	26553294	IENQQGIENLDEIIEAADGIMIAR	IENQQGIENLDEIIEAADGIMIAR	250	24	3.43	142	5	5	1	0	4122893	63879		390	2.6	b7b12y7y8y11	403341	2475	221212553895603	107475035930402	0.0125	Yellow	11132	26553384	26553330	446012	2611	2611.00	3.00	3
1362	NCDO2118_RS07185	pyruvate kinase 1499467:1500975 reverse MW:54255	Regular	59250460	0	543119936	115	16	33	44.42	208761	134607	69732	0	8	Pass1	PepFrag1	None	7884876	LGLSLTGK	LGLSLTGK	155	8	10.10	144	2	2	1	0	5727203	65306		531	1.7	y7y8	184994	769	101479237201927	614792372019271	0.0120	Yellow	6846	7884879	7884899	224745	2506	2506.00	1.52	2
1362	NCDO2118_RS07185	pyruvate kinase 1499467:1500975 reverse MW:54255	Regular	59250460	0	543119936	115	16	33	44.42	208761	134607	69732	0	9	Pass1	PepFrag1	None	12547416	IVSTLGPAVEIR	IVSTLGPAVEIR	6	12	7.00	137	4	4	2	0	15645120	69671	Identified	524	1.9	y6y7y9y10	292498	1210	137282932554542	972829325545422	0.0112	Green	7421	12547415	12547429	253258	2339	2339.00	2.00	2
1362	NCDO2118_RS07185	pyruvate kinase 1499467:1500975 reverse MW:54255	Regular	59250460	0	543119936	115	16	33	44.42	208761	134607	69732	0	10	Pass1	PepFrag1	None	15168118	NIAALIEEGANVFR	NIAALIEEGANVFR	40	14	4.26	141	7	7	4	1	22055350	71162		602	2.0	b2b3b4b5y7y8y11	332479	1419	152667958378682	112667958378682	0.0104	Green	10763	15168080	15168086	415421	2162	2162.00	2.00	2
1362	NCDO2118_RS07185	pyruvate kinase 1499467:1500975 reverse MW:54255	Regular	59250460	0	543119936	115	16	33	44.42	208761	134607	69732	0	11	Pass1	PepFrag1	None	31264832	GLMINWGVIPTMTEKPSSTDDMFEVAEK	GLMINWGVIPTMTEKPSSTDDMFEVAEK	438	28	3.92	148	1	1	0	0	3026475	62536	Identified	41	2.3	b9	400564	2895	245579444639063	123719629759375	0.0076	Yellow	10424	31265062	31264940	398239	1596	1596.00	3.00	3
1362	NCDO2118_RS07185	pyruvate kinase 1499467:1500975 reverse MW:54255	Regular	59250460	0	543119936	115	16	33	44.42	208761	134607	69732	0	12	Pass2	PepFrag2	None	10135778	IPFPALAER	IPFPALAER	192	9	7.00	145	8	8	6	2	144232800	79318	Identified	7177	3.7	b2b3y4y5y6y7y7y8y9	269497	954	117163377846316	771633778463164	0.0899	Green	7865	10135670	10135688	276986	18774	18774.00	2.00	2
1362	NCDO2118_RS07185	pyruvate kinase 1499467:1500975 reverse MW:54255	Regular	59250460	0	543119936	115	16	33	44.42	208761	134607	69732	0	13	Pass2	PepFrag2	None	8054236	NAQTMLK	NAQTMLK	363	7	10.10	147	3	3	1	0	2286152	61318		2735	3.0	b6b6b7y7	126718	753	100066709325229	160133418650458	0.0637	Yellow	1522	8054308	8054322	117475	13300	13300.00	1.27	1
1362	NCDO2118_RS07185	pyruvate kinase 1499467:1500975 reverse MW:54255	Regular	59250460	0	543119936	115	16	33	44.42	208761	134607	69732	0	14	Pass2	PepFrag2	None	8544367	AEEIAGHK	AEEIAGHK	74	8	5.30	143	0	0	0	0	731693	56370		35	1.6	y6	66948	777	102181823041159	621818230411586	0.0110	Red	857	8544312	8544331	99442	2290	2290.00	1.74	2
1362	NCDO2118_RS07185	pyruvate kinase 1499467:1500975 reverse MW:54255	Regular	59250460	0	543119936	115	16	33	44.42	208761	134607	69732	0	15	Pass2	PepFrag2	None	18088913	TELFADGADAISVVTGDK	TELFADGADAISVVTGDK	95	18	3.50	150	1	1	0	0	1212050	58562		34	1.5	y11	319425	1666	169906358587853	129906358587853	0.0039	Yellow	9598	18089059	18089052	358476	816	816.00	2.00	2
1362	NCDO2118_RS07185	pyruvate kinase 1499467:1500975 reverse MW:54255	Regular	59250460	0	543119936	115	16	33	44.42	208761	134607	69732	0	16	Pass2	MissedCleavage	None	26083518	DDADIRFGLSQPGGINFIAISFVR	DDADIRFGLSQPGGINFIAISFVR	201	24	4.17	149	0	0	0	0	1226380	58613	Missing	39	1.7	b12	435798	2423	218103136075778	105402090717185	0.0038	Yellow	11579	26083785	26083737	493126	794	794.00	3.00	3
1362	NCDO2118_RS07185	pyruvate kinase 1499467:1500975 reverse MW:54255	Regular	59250460	0	543119936	115	16	33	44.42	208761	134607	69732	0	17	Pass2	InSource	None	6754036	GLSLTGK	LGLSLTGK	156	7	10.10	144	2	2	0	0	5479503	0.0000		162	0.0	y3y7	184994	645	902539276707172	140507855341434	0.0067	Yellow	6842	6754036	6754055	224646	1400	1400.00	1.00	1
1362	NCDO2118_RS07185	pyruvate kinase 1499467:1500975 reverse MW:54255	Regular	59250460	0	543119936	115	16	33	44.42	208761	134607	69732	0	18	Pass2	InSource	None	7424206	GVPVGTGR	VALASGLVESGDNIIIVAGVPVGTGR	484	8	11.05	140	1	1	0	0	2252431	0.0000	Missing	659	0.0	y8	397881	685	939478145556335	147895629111267	0.0057	Green	9818	7424195	7424212	369470	1200	1200.00	1.00	1
1362	NCDO2118_RS07185	pyruvate kinase 1499467:1500975 reverse MW:54255	Regular	59250460	0	543119936	115	16	33	44.42	208761	134607	69732	0	19	Pass2	InSource	None	7934454	GFLLDTK	VGFLLDTK	83	7	6.78	138	1	1	0	0	1569810	0.0000		228	0.0	y7	274310	750	998007510978401	15960150219568	0.0041	Green	7673	7934460	7934474	266403	852	852.00	1.00	1
1362	NCDO2118_RS07185	pyruvate kinase 1499467:1500975 reverse MW:54255	Regular	24398290	0	543119936	37	7	33	16.14	75621	69833	20756	1	1	Pass1	PepFrag1	None	24643770	VALASGLVESGDNIIIVAGVPVGTGR	VALASGLVESGDNIIIVAGVPVGTGR	466	26	4.07	461	24	24	16	7	457369300	80476	Identified	17740	8.0	b3b4b5b5b6b7b8b9b10b13b14b14b15b15b16b17b18b20y4y6y7y8y9y10y11y12y16y26	370535	2359	214245443756502	102830295837668	0.7187	Green	16447	24643800	24643792	368438	54350	54350.00	2.89	3
1362	NCDO2118_RS07185	pyruvate kinase 1499467:1500975 reverse MW:54255	Regular	24398290	0	543119936	37	7	33	16.14	75621	69833	20756	0	2	Pass1	PepFrag1	None	15347384	EFEVEAQNDGVIGK	EFEVEAQNDGVIGK	168	14	3.69	459	5	5	1	1	8116466	62967		815	3.8	b2b3b4b5b11b12y3y8y8*	228928	1395	150941654454293	110941654454293	0.1746	Green	7970	15347463	15347482	207686	13205	13205.00	2.00	2
1362	NCDO2118_RS07185	pyruvate kinase 1499467:1500975 reverse MW:54255	Regular	24398290	0	543119936	37	7	33	16.14	75621	69833	20756	0	3	Pass1	PepFrag1	None	13447482	LIVALTESGNTAR	LIVALTESGNTAR	403	13	7.00	460	3	3	0	0	5961264	61627		291	1.7	b2b11y6y10	226457	1271	141858926121739	101858926121739	0.0197	Green	9986	13447456	13447480	228012	1489	1489.00	2.00	2
1362	NCDO2118_RS07185	pyruvate kinase 1499467:1500975 reverse MW:54255	Regular	24398290	0	543119936	37	7	33	16.14	75621	69833	20756	0	4	Pass2	PepFrag2	None	13106521	NAQTMLKEYGR	NAQTMLKEYGR	363	11	9.72	463	0	0	0	0	4838672	60721		61	1.8	y7	153145	1199	136449649027853	964496490278527	0.0301	Green	4411	13106174	13106199	171721	2278	2278.00	2.00	2
1362	NCDO2118_RS07185	pyruvate kinase 1499467:1500975 reverse MW:54255	Regular	24398290	0	543119936	37	7	33	16.14	75621	69833	20756	0	5	Pass2	PepFrag2	None	9624612	NAAEAMDIK	NAAEAMDIK	394	9	4.07	464	2	2	0	0	7048188	62354		1306	1.6	b9*y3y9y9*	149417	880	111023457736826	182046915473652	0.0270	Green	4954	9624445	9624457	177466	2042	2042.00	1.00	1
1362	NCDO2118_RS07185	pyruvate kinase 1499467:1500975 reverse MW:54255	Regular	24398290	0	543119936	37	7	33	16.14	75621	69833	20756	0	6	Pass2	PepFrag2	None	7643971	TMATVNK	TMATVNK	356	7	10.10	465	1	1	0	0	329129	49047		34	1.3	b6	96619	713	964908178407953	152981635681591	0.0166	Red	1716	7643694	7643712	138643	1256	1256.00	1.00	1
1362	NCDO2118_RS07185	pyruvate kinase 1499467:1500975 reverse MW:54255	Regular	24398290	0	543119936	37	7	33	16.14	75621	69833	20756	0	7	Pass2	PepFrag2	None	8424730	GVNIPNTK	GVNIPNTK	184	8	10.10	462	2	2	0	0	5781405	61494	Identified	509	1.2	y3y4y8	120170	787	103056674068113	166113348136225	0.0132	Green	1953	8424787	8424803	143060	1001	1001.00	1.00	1
1362	NCDO2118_RS07185	pyruvate kinase 1499467:1500975 reverse MW:54255	Regular	20922870	0	543119936	55	12	33	35.46	236166	215988	171563	1	1	Pass1	PepFrag1	Carbamidomethyl C(2)	17088687	ICEETGNPHVQLLAK	ICEETGNPHVQLLAK	235	15	5.30	701	20	20	13	5	125416000	74190	Identified	158651	10.3	b2b3b4b4b5b5b6b6b7*b7b9b10*b11b12b13b14b15y1y3y4y5y6y8y9y9*y13*y13y14y15	236234	1542	161367430379895	121367430379895	0.7859	Green	5541	17088623	17088632	196405	185609	185609.00	2.12	2
1362	NCDO2118_RS07185	pyruvate kinase 1499467:1500975 reverse MW:54255	Regular	20922870	0	543119936	55	12	33	35.46	236166	215988	171563	0	2	Pass1	PepFrag1	None	24643770	VALASGLVESGDNIIIVAGVPVGTGR	VALASGLVESGDNIIIVAGVPVGTGR	466	26	4.07	703	18	18	12	5	320272500	78261	Identified	7987	6.1	b3b6b7b8b13b14b14b15b16b17b20y6y7y8y9y10y11y12y26	365814	2359	214245443756502	102830295837668	0.1061	Green	16231	24643773	24643757	368140	25051	25051.00	2.87	3
1362	NCDO2118_RS07185	pyruvate kinase 1499467:1500975 reverse MW:54255	Regular	20922870	0	543119936	55	12	33	35.46	236166	215988	171563	0	3	Pass1	PepFrag1	None	18088913	TELFADGADAISVVTGDK	TELFADGADAISVVTGDK	95	18	3.50	702	5	5	0	0	4288488	59529		765	3.0	b6b11y10y13y15	300279	1666	169906358587853	129906358587853	0.0226	Green	13445	18088967	18088971	288997	5328	5328.00	2.00	2
1362	NCDO2118_RS07185	pyruvate kinase 1499467:1500975 reverse MW:54255	Regular	20922870	0	543119936	55	12	33	35.46	236166	215988	171563	0	4	Pass1	PepFrag1	None	26553294	IENQQGIENLDEIIEAADGIMIAR	IENQQGIENLDEIIEAADGIMIAR	250	24	3.43	704	3	3	1	0	4997265	60194		301	2.2	b12b13y8	365912	2475	221212553895603	107475035930402	0.0069	Green	16463	26553368	26553336	383514	1626	1626.00	3.00	3
1362	NCDO2118_RS07185	pyruvate kinase 1499467:1500975 reverse MW:54255	Regular	20922870	0	543119936	55	12	33	35.46	236166	215988	171563	0	5	Pass1	PepFrag1	None	15347384	EFEVEAQNDGVIGK	EFEVEAQNDGVIGK	168	14	3.69	705	1	1	0	0	1207838	54026		35	1.6	y7	225103	1395	150941654454293	606277696361955	0.0053	Yellow	14020	15347323	15347354	300201	1261	1261.00	3.00	3
1362	NCDO2118_RS07185	pyruvate kinase 1499467:1500975 reverse MW:54255	Regular	20922870	0	543119936	55	12	33	35.46	236166	215988	171563	0	6	Pass1	PepFrag1	None	8424730	GVNIPNTK	GVNIPNTK	184	8	10.10	700	2	2	0	0	6828878	61550	Identified	592	1.3	y4y8	109324	787	103056674068113	166113348136225	0.0047	Green	1335	8424738	8424757	141973	1107	1107.00	1.00	1
1362	NCDO2118_RS07185	pyruvate kinase 1499467:1500975 reverse MW:54255	Regular	20922870	0	543119936	55	12	33	35.46	236166	215988	171563	0	7	Pass2	PepFrag2	None	10135778	IPFPALAER	IPFPALAER	192	9	7.00	711	0	0	0	0	2920962	57861	Identified	70	1.2	y2y6	239203	954	117163377846316	771633778463164	0.0034	Green	10528	10135393	10135422	248437	795	795.00	2.00	2
1362	NCDO2118_RS07185	pyruvate kinase 1499467:1500975 reverse MW:54255	Regular	20922870	0	543119936	55	12	33	35.46	236166	215988	171563	0	8	Pass2	MissedCleavage	None	22681475	IVVTATNMLESMTYNPRATR	IVVTATNMLESMTYNPRATR	302	20	9.84	706	1	1	0	0	2616976	57384	Missing	322	1.8	y6*y7y20	271307	2113	199079236075698	927194907171321	0.0049	Green	13238	22681420	22681417	286053	1164	1164.00	3.00	3
1362	NCDO2118_RS07185	pyruvate kinase 1499467:1500975 reverse MW:54255	Regular	20922870	0	543119936	55	12	33	35.46	236166	215988	171563	0	9	Pass2	VarMod	Phosphoryl STY(*)	12706290	STVTEVVAASVK	STVTEVVAASVK	382	12	7.00	709	3	3	1	0	2993105	57967		1856	3.3	y4y11y12	193767	1130	131163177712208	911631777122084	0.0439	Green	7876	12706308	12706334	218803	10358	10358.00	2.00	2
1362	NCDO2118_RS07185	pyruvate kinase 1499467:1500975 reverse MW:54255	Regular	20922870	0	543119936	55	12	33	35.46	236166	215988	171563	0	10	Pass2	VarMod	Oxidation M(1)	15657853	MATVHRAEEIAGHK	MATVHRAEEIAGHK	68	14	7.97	710	1	1	0	0	819107	52340		222	1.8	b9b13y7y12	109082	1432	153598973330711	113598973330711	0.0069	Yellow	13823	15657852	15657868	296582	1638	1638.00	2.00	2
1362	NCDO2118_RS07185	pyruvate kinase 1499467:1500975 reverse MW:54255	Regular	20922870	0	543119936	55	12	33	35.46	236166	215988	171563	0	11	Pass2	VarMod	Oxidation M(5)	13266470	NAQTMLKEYGR	NAQTMLKEYGR	363	11	9.72	708	0	0	0	0	1279084	54275		239	1.5	b6b9	153306	1199	136449649027853	964496490278527	0.0052	Yellow	4673	13266485	13266510	187566	1233	1233.00	2.00	2
1362	NCDO2118_RS07185	pyruvate kinase 1499467:1500975 reverse MW:54255	Regular	20922870	0	543119936	55	12	33	35.46	236166	215988	171563	0	12	Pass2	VarMod	Oxidation M(2)	7803920	TMATVNK	TMATVNK	356	7	10.10	707	1	1	0	0	3269027	58350		523	1.2	y3*y5*y7	90851	713	964908178407953	152981635681591	0.0042	Green	4330	7803917	7803937	183932	996	996.00	1.00	1
1362	NCDO2118_RS07185	pyruvate kinase 1499467:1500975 reverse MW:54255	Regular	14281260	0	543119936	99	17	33	42.43	250333	99651	105619	1	1	Pass1	PepFrag1	Carbamidomethyl C(2)	17088687	ICEETGNPHVQLLAK	ICEETGNPHVQLLAK	235	15	5.30	1028	12	12	4	3	93278160	71245	Identified	70517	7.6	b4b5b5b7*b10b11b13b14b15y2y4y6y7y11y12y13y14y14*	213716	1542	161367430379895	121367430379895	0.3238	Green	3492	17088752	17088753	196011	81053	81053.00	2.00	2
1362	NCDO2118_RS07185	pyruvate kinase 1499467:1500975 reverse MW:54255	Regular	14281260	0	543119936	99	17	33	42.43	250333	99651	105619	0	2	Pass1	PepFrag1	None	24643770	VALASGLVESGDNIIIVAGVPVGTGR	VALASGLVESGDNIIIVAGVPVGTGR	466	26	4.07	1035	10	10	7	1	42879900	67870	Identified	2793	4.2	b7b13b13*b14b15b16y6y7y8y9y10	361845	2359	214245443756502	102830295837668	0.0376	Green	16077	24643697	24643684	367575	9407	9407.00	2.86	3
1362	NCDO2118_RS07185	pyruvate kinase 1499467:1500975 reverse MW:54255	Regular	14281260	0	543119936	99	17	33	42.43	250333	99651	105619	0	3	Pass1	PepFrag1	None	26553294	IENQQGIENLDEIIEAADGIMIAR	IENQQGIENLDEIIEAADGIMIAR	250	24	3.43	1036	13	13	6	2	77663540	70450		3291	4.1	b5b7b7*b8b9b10*b12*b13b13b18y7y8y9y10y10y11y16y24	374470	2475	221212553895603	107475035930402	0.0367	Green	16680	26553315	26553282	382324	9191	9191.00	2.86	3
1362	NCDO2118_RS07185	pyruvate kinase 1499467:1500975 reverse MW:54255	Regular	14281260	0	543119936	99	17	33	42.43	250333	99651	105619	0	4	Pass1	PepFrag1	None	17399075	HRPNADILAITFDEK	HRPNADILAITFDEK	420	15	5.28	1034	4	4	2	1	10890210	61918	Missing	727	3.4	b7b8b9y2y6y7	279431	1612	166214787680525	708098584536835	0.0366	Green	15348	17398992	17399028	349054	9164	9164.00	3.00	3
1362	NCDO2118_RS07185	pyruvate kinase 1499467:1500975 reverse MW:54255	Regular	14281260	0	543119936	99	17	33	42.43	250333	99651	105619	0	5	Pass1	PepFrag1	None	11906627	STVTEVVAASVK	STVTEVVAASVK	382	12	7.00	1030	5	5	2	0	16246930	63655		778	2.8	b2b3b4y4y5y7y8y9	204303	1130	131163177712208	911631777122084	0.0266	Green	5833	11906602	11906628	224913	6656	6656.00	2.00	2
1362	NCDO2118_RS07185	pyruvate kinase 1499467:1500975 reverse MW:54255	Regular	14281260	0	543119936	99	17	33	42.43	250333	99651	105619	0	6	Pass1	PepFrag1	None	18088913	TELFADGADAISVVTGDK	TELFADGADAISVVTGDK	95	18	3.50	1033	11	11	6	3	81862550	70679		1524	3.2	b2b3b4b5b6y4y5y12y14y15y18	309204	1666	169906358587853	129906358587853	0.0243	Green	13894	18088930	18088924	322441	6093	6093.00	2.00	2
1362	NCDO2118_RS07185	pyruvate kinase 1499467:1500975 reverse MW:54255	Regular	14281260	0	543119936	99	17	33	42.43	250333	99651	105619	0	7	Pass1	PepFrag1	None	16988810	IPFPALAERDDADIR	IPFPALAERDDADIR	192	15	3.97	1031	3	3	0	0	29769960	66285	Identified	853	2.4	y2y12y14	271793	1566	163037487006469	686916580043129	0.0143	Green	10030	16988802	16988840	270124	3574	3574.00	3.00	3
1362	NCDO2118_RS07185	pyruvate kinase 1499467:1500975 reverse MW:54255	Regular	14281260	0	543119936	99	17	33	42.43	250333	99651	105619	0	8	Pass1	PepFrag1	None	19318658	FGESGYWGESLDVEASAK	FGESGYWGESLDVEASAK	22	18	3.69	1032	1	1	0	0	5147410	58664		1187	2.4	y7y9y18	294029	1718	17342368383482	756157892232132	0.0120	Green	13033	19318699	19318726	309752	3001	3001.00	2.59	3
1362	NCDO2118_RS07185	pyruvate kinase 1499467:1500975 reverse MW:54255	Regular	14281260	0	543119936	99	17	33	42.43	250333	99651	105619	0	9	Pass1	PepFrag1	None	5733970	LIISK	LIISK	291	5	10.10	1037	4	4	1	1	52376980	68739		575	1.5	b2y2y3y5	150808	580	840836643499463	128167328699893	0.0119	Green	1187	5733955	5733973	149836	2984	2984.00	1.00	1
1362	NCDO2118_RS07185	pyruvate kinase 1499467:1500975 reverse MW:54255	Regular	14281260	0	543119936	99	17	33	42.43	250333	99651	105619	0	10	Pass1	PepFrag1	None	15347384	EFEVEAQNDGVIGK	EFEVEAQNDGVIGK	168	14	3.69	1029	2	2	0	0	5774012	59162		138	1.6	y10y12	245696	1395	150941654454293	110941654454293	0.0048	Green	4272	15347333	15347345	206853	1196	1196.00	2.00	2
1362	NCDO2118_RS07185	pyruvate kinase 1499467:1500975 reverse MW:54255	Regular	14281260	0	543119936	99	17	33	42.43	250333	99651	105619	0	11	Pass1	PepFrag1	None	15987095	FNFSHGDHPEQGAR	FNFSHGDHPEQGAR	54	14	6.02	1027	1	1	0	0	1922819	54387	Identified	35	1.6	y6	133470	1390	150580765645106	603871770967373	0.0046	Yellow	1665	15986983	15987024	165292	1161	1161.00	3.00	3
1362	NCDO2118_RS07185	pyruvate kinase 1499467:1500975 reverse MW:54255	Regular	14281260	0	543119936	99	17	33	42.43	250333	99651	105619	0	12	Pass2	PepFrag2	None	10135778	IPFPALAER	IPFPALAER	192	9	7.00	1043	3	3	2	0	5614621	59041	Identified	355	1.5	y6y7y8	236399	954	117163377846316	771633778463164	0.0059	Green	10222	10135508	10135537	272527	1466	1466.00	2.00	2
1362	NCDO2118_RS07185	pyruvate kinase 1499467:1500975 reverse MW:54255	Regular	14281260	0	543119936	99	17	33	42.43	250333	99651	105619	0	13	Pass2	VarMod	Phosphoryl STY(1)	12706290	STVTEVVAASVK	STVTEVVAASVK	382	12	7.00	1040	6	6	0	2	10941470	61938		9547	6.2	b8b10b12y2y4y12	204303	1130	131163177712208	911631777122084	0.2338	Green	5425	12706309	12706332	220573	58528	58528.00	2.00	2
1362	NCDO2118_RS07185	pyruvate kinase 1499467:1500975 reverse MW:54255	Regular	14281260	0	543119936	99	17	33	42.43	250333	99651	105619	0	14	Pass2	VarMod	Phosphoryl STY(*)	12706290	STVTEVVAASVK	STVTEVVAASVK	382	12	7.00	1041	5	5	1	1	6105395	59405		7395	5.4	b8b10y4y11y12	204303	1130	131163177712208	911631777122084	0.1617	Green	5226	12706322	12706346	218592	40489	40489.00	2.00	2
1362	NCDO2118_RS07185	pyruvate kinase 1499467:1500975 reverse MW:54255	Regular	14281260	0	543119936	99	17	33	42.43	250333	99651	105619	0	15	Pass2	VarMod	Oxidation M(21)	26713243	IENQQGIENLDEIIEAADGIMIAR	IENQQGIENLDEIIEAADGIMIAR	250	24	3.43	1038	13	13	7	2	28068580	66030		4099	4.5	b4b7b10*b11b12b12b13b14b17*y4y6y7y7y8y9y10y11y14y24	374470	2475	221212553895603	107475035930402	0.0473	Green	16968	26713327	26713292	393005	11849	11849.00	2.91	3
1362	NCDO2118_RS07185	pyruvate kinase 1499467:1500975 reverse MW:54255	Regular	14281260	0	543119936	99	17	33	42.43	250333	99651	105619	0	16	Pass2	VarMod	Phosphoryl STY(*)	23481138	IVVTATNMLESMTYNPRATR	IVVTATNMLESMTYNPRATR	302	20	9.84	1042	2	2	0	0	2788708	56002	Missing	980	2.4	b10y8*y20	248375	2113	199079236075698	159079236075698	0.0104	Yellow	13218	23481150	23481092	312391	2605	2605.00	2.15	2
1362	NCDO2118_RS07185	pyruvate kinase 1499467:1500975 reverse MW:54255	Regular	14281260	0	543119936	99	17	33	42.43	250333	99651	105619	0	17	Pass2	VarMod	Oxidation M(3)	19549289	GDMGIEVPFEMVPVYQK	GDMGIEVPFEMVPVYQK	274	17	3.83	1039	4	4	0	0	4651243	58223	Identified	825	2.0	b17*y5y9*y10y10y12y15	360200	1797	178700191922053	138700191922053	0.0077	Green	11804	19549220	19549202	294791	1916	1916.00	2.00	2
1362	NCDO2118_RS07185	pyruvate kinase 1499467:1500975 reverse MW:54255	Regular	170502700	0	543119936	257	22	33	56.18	2002948	1150442	879591	1	1	Pass1	PepFrag1	None	19399616	IVVTATNMLESMTYNPR	IVVTATNMLESMTYNPR	302	17	7.00	115	29	29	23	12	1356164000	93640	Identified	161042	15.8	b2b3b4b4b5b5b6b6b7b8b8b9b10b10b11b11b12b12b14b14b15b15*b17y1y2y3y3*y4y4*y5y5y6y6*y6y7y7y8y9y9y10y11y11y12y12*y12y13y14y15y15*y15y17	304715	1805	179230165172554	139230165172554	0.2656	Green	22509	19399596	19399600	315392	531954	531954.00	2.32	2
1362	NCDO2118_RS07185	pyruvate kinase 1499467:1500975 reverse MW:54255	Regular	170502700	0	543119936	257	22	33	56.18	2002948	1150442	879591	0	2	Pass1	PepFrag1	None	24643770	VALASGLVESGDNIIIVAGVPVGTGR	VALASGLVESGDNIIIVAGVPVGTGR	466	26	4.07	117	38	38	30	13	948288700	92087	Identified	143418	15.7	b2b3b4b5b6b7b8b8b9b10b10b11b12b13b13b14b14*b14b15b15*b16b16b17b18b19b20b20b26y1y2y3y4y5y6y7y8y9y10y11y12y14y15y16y17y18y18y19y24y26	389357	2359	214245443756502	102830295837668	0.1698	Green	32535	24643838	24643835	361959	340072	340072.00	2.69	3
1362	NCDO2118_RS07185	pyruvate kinase 1499467:1500975 reverse MW:54255	Regular	170502700	0	543119936	257	22	33	56.18	2002948	1150442	879591	0	3	Pass1	PepFrag1	None	31264832	GLMINWGVIPTMTEKPSSTDDMFEVAEK	GLMINWGVIPTMTEKPSSTDDMFEVAEK	438	28	3.92	118	21	21	13	8	262812400	86514	Identified	182726	15.0	b2b3b4b5b5*b6b6*b7b7*b8b8*b9b9*b14*b15b15*b21b22*y6y6y13y16y17y19y21y21y22y22y23y23y24y25y25*y26y28	430981	2895	245579444639063	123719629759375	0.1390	Green	36490	31264846	31264780	382908	278416	278416.00	2.97	3
1362	NCDO2118_RS07185	pyruvate kinase 1499467:1500975 reverse MW:54255	Regular	170502700	0	543119936	257	22	33	56.18	2002948	1150442	879591	0	4	Pass1	PepFrag1	None	8925138	VGFLLDTK	VGFLLDTK	82	8	6.78	113	9	9	6	1	277662900	86752		124085	8.0	b2b3b4b5b6b6b7b7b8y2y3y7y8	236898	855	108910656856658	177821313713317	0.1229	Green	8815	8925112	8925137	251283	246104	246104.00	1.00	1
1362	NCDO2118_RS07185	pyruvate kinase 1499467:1500975 reverse MW:54255	Regular	170502700	0	543119936	257	22	33	56.18	2002948	1150442	879591	0	5	Pass1	PepFrag1	None	12547416	IVSTLGPAVEIR	IVSTLGPAVEIR	6	12	7.00	112	15	15	11	4	597680700	90082	Identified	111805	9.9	b2b3b3b4b4b5b5b12b12y2y3y4y6y7y8y9y9y10y10y11y12	253728	1210	137282932554542	972829325545422	0.1045	Green	7130	12547334	12547367	241213	209304	209304.00	1.97	2
1362	NCDO2118_RS07185	pyruvate kinase 1499467:1500975 reverse MW:54255	Regular	170502700	0	543119936	257	22	33	56.18	2002948	1150442	879591	0	6	Pass1	PepFrag1	None	7884876	LGLSLTGK	LGLSLTGK	155	8	10.10	111	15	15	13	6	526900700	89535		78474	7.5	b2b3b4b4b5b5b6b6b7b7b8b8y1y2y3y3y4y4y5y5y6y6y7y7y8	159961	769	101479237201927	162958474403854	0.0741	Green	2804	7884858	7884884	204360	148346	148346.00	1.03	1
1362	NCDO2118_RS07185	pyruvate kinase 1499467:1500975 reverse MW:54255	Regular	170502700	0	543119936	257	22	33	56.18	2002948	1150442	879591	0	7	Pass1	PepFrag1	None	19230487	FGLSQPGGINFIAISFVR	FGLSQPGGINFIAISFVR	207	18	11.05	119	21	21	12	8	380526400	88121	Identified	17970	5.9	b3b4b5b5*b5b6b7b10b10*b10b11b14b16*b17b18y1y3y4y6y7y8y12y13y14y15y18	410946	1811	179627131410996	139627131410996	0.0168	Green	40555	19230408	19230414	420169	33685	33685.00	2.09	2
1362	NCDO2118_RS07185	pyruvate kinase 1499467:1500975 reverse MW:54255	Regular	170502700	0	543119936	257	22	33	56.18	2002948	1150442	879591	0	8	Pass1	PepFrag1	None	15168118	NIAALIEEGANVFR	NIAALIEEGANVFR	40	14	4.26	121	17	17	12	4	211807100	85577		10115	5.2	b3b4b5b6*b7b7b10*b12*b14y2y3y4y5y6y7y8y9y10y10y11y11y12y14	353073	1419	152667958378682	112667958378682	0.0154	Green	39058	15168141	15168168	403082	30818	30818.00	2.08	2
1362	NCDO2118_RS07185	pyruvate kinase 1499467:1500975 reverse MW:54255	Regular	170502700	0	543119936	257	22	33	56.18	2002948	1150442	879591	0	9	Pass1	PepFrag1	None	26553294	IENQQGIENLDEIIEAADGIMIAR	IENQQGIENLDEIIEAADGIMIAR	250	24	3.43	120	17	17	10	2	215719200	85656		9503	5.8	b1b5b7b12b13b13*b15b16y2y3y4y5y6y7y8y9y10y11y24	429359	2475	221212553895603	107475035930402	0.0120	Green	42254	26553322	26553304	440649	24054	24054.00	2.83	3
1362	NCDO2118_RS07185	pyruvate kinase 1499467:1500975 reverse MW:54255	Regular	170502700	0	543119936	257	22	33	56.18	2002948	1150442	879591	0	10	Pass1	PepFrag1	Carbamidomethyl C(2)	17088687	ICEETGNPHVQLLAK	ICEETGNPHVQLLAK	235	15	5.30	110	11	11	6	1	39762450	78312	Identified	2871	4.9	b2y2y3y5y6y7y8y10y11y11*y13y13y14y14*	198629	1542	161367430379895	6757828691993	0.0120	Green	1390	17088558	17088596	179195	24005	24005.00	2.92	3
1362	NCDO2118_RS07185	pyruvate kinase 1499467:1500975 reverse MW:54255	Regular	170502700	0	543119936	257	22	33	56.18	2002948	1150442	879591	0	11	Pass1	PepFrag1	None	19389340	GDMGIEVPFEMVPVYQK	GDMGIEVPFEMVPVYQK	274	17	3.83	116	6	6	3	2	55157430	79733	Identified	3611	3.5	b4b5b6b7y10y12	384805	1797	178700191922053	138700191922053	0.0042	Green	31722	19389413	19389418	358102	8370	8370.00	2.00	2
1362	NCDO2118_RS07185	pyruvate kinase 1499467:1500975 reverse MW:54255	Regular	170502700	0	543119936	257	22	33	56.18	2002948	1150442	879591	0	12	Pass1	PepFrag1	None	13447482	LIVALTESGNTAR	LIVALTESGNTAR	403	13	7.00	122	4	4	1	0	25338180	76355		545	2.6	b4y5y10y11y12	226655	1271	141858926121739	101858926121739	0.0025	Green	7685	13447453	13447485	244080	5013	5013.00	2.00	2
1362	NCDO2118_RS07185	pyruvate kinase 1499467:1500975 reverse MW:54255	Regular	170502700	0	543119936	257	22	33	56.18	2002948	1150442	879591	0	13	Pass1	PepFrag1	None	17399075	HRPNADILAITFDEK	HRPNADILAITFDEK	420	15	5.28	114	2	2	0	0	3937853	68270	Missing	399	1.7	b7*b10y2y4	233042	1612	166214787680525	708098584536835	0.0007	Green	18773	17398994	17399031	299868	1326	1326.00	3.00	3
1362	NCDO2118_RS07185	pyruvate kinase 1499467:1500975 reverse MW:54255	Regular	170502700	0	543119936	257	22	33	56.18	2002948	1150442	879591	0	14	Pass2	MissedCleavage	None	15508029	TMATVNKNAQTMLK	TMATVNKNAQTMLK	356	14	10.60	124	4	4	0	0	6978412	70755		457	3.1	b4b12*y2y4y5y6	177542	1466	15602072119427	11602072119427	0.0038	Green	3237	15507937	15507962	209463	7535	7535.00	2.22	2
1362	NCDO2118_RS07185	pyruvate kinase 1499467:1500975 reverse MW:54255	Regular	170502700	0	543119936	257	22	33	56.18	2002948	1150442	879591	0	15	Pass2	MissedCleavage	None	21341060	STVTEVVAASVKNAAEAMDIK	STVTEVVAASVKNAAEAMDIK	382	21	4.44	125	3	3	0	0	3563094	67836		656	3.4	b4b6b6b15b18*y8y11y12y13y14	312593	2010	19255597788594	883706519239597	0.0031	Green	35838	21340806	21340825	378964	6226	6226.00	2.61	3
1362	NCDO2118_RS07185	pyruvate kinase 1499467:1500975 reverse MW:54255	Regular	170502700	0	543119936	257	22	33	56.18	2002948	1150442	879591	0	16	Pass2	MissedCleavage	None	24933132	GDMGIEVPFEMVPVYQKLIISK	GDMGIEVPFEMVPVYQKLIISK	274	22	4.44	123	1	1	0	0	1214340	63161	Missing	44	1.9	y14	448075	2377	215333907863163	175333907863163	0.0006	Green	46063	24933375	24933333	506576	1187	1187.00	2.00	2
1362	NCDO2118_RS07185	pyruvate kinase 1499467:1500975 reverse MW:54255	Regular	170502700	0	543119936	257	22	33	56.18	2002948	1150442	879591	0	17	Pass2	VarMod	Oxidation M(4)	9074778	TNTMRIR	TNTMRIR	492	7	12.40	131	3	3	1	0	1973451	65270		4654	2.9	b4y6y7y7*	32666	826	10643382394892	172867647897841	0.0063	Green	20157	9074718	9074743	305675	12692	12692.00	1.16	1
1362	NCDO2118_RS07185	pyruvate kinase 1499467:1500975 reverse MW:54255	Regular	170502700	0	543119936	257	22	33	56.18	2002948	1150442	879591	0	18	Pass2	VarMod	Phosphoryl STY(*);Phosphoryl STY(*)	57317749	GLMINWGVIPTMTEKPSSTDDMFEVAEKVALASGLVESGDNIIIVAGVPVGTGR	GLMINWGVIPTMTEKPSSTDDMFEVAEKVALASGLVESGDNIIIVAGVPVGTGR	438	54	3.96	130	4	4	0	0	1977702	65279	Identified	7425	5.5	b8-H3PO4b9b9-H3PO4b10*b10-H3PO4b13*b13-H3PO4b17-H3PO4b18*b21b28-2(H3PO4)b29*y13y54	393665	5254	365386933962884	142693466981442	0.0046	Green	38079	57318063	57317936	391436	9232	9232.00	4.37	4
1362	NCDO2118_RS07185	pyruvate kinase 1499467:1500975 reverse MW:54255	Regular	170502700	0	543119936	257	22	33	56.18	2002948	1150442	879591	0	19	Pass2	VarMod	Oxidation M(8)	19559565	IVVTATNMLESMTYNPR	IVVTATNMLESMTYNPR	302	17	7.00	126	10	10	5	1	22279400	75796	Missing	5581	2.8	b4b4b5b5b6b7b10b11y3y4y5y6y8y8*y8y9	304715	1805	179230165172554	794867767817027	0.0023	Green	22537	19559572	19559600	315524	4665	4665.00	2.94	3
1362	NCDO2118_RS07185	pyruvate kinase 1499467:1500975 reverse MW:54255	Regular	170502700	0	543119936	257	22	33	56.18	2002948	1150442	879591	0	20	Pass2	VarMod	Oxidation M(8);Phosphoryl STY(19)	23641087	IVVTATNMLESMTYNPRATR	IVVTATNMLESMTYNPRATR	302	20	9.84	129	1	1	0	0	645725	60418	Identified	614	2.5	b4b5b7b8y5y6-H3PO4y12-H3PO4	266169	2113	199079236075698	927194907171321	0.0014	Green	14962	23641235	23641240	283191	2837	2837.00	3.00	3
1362	NCDO2118_RS07185	pyruvate kinase 1499467:1500975 reverse MW:54255	Regular	170502700	0	543119936	257	22	33	56.18	2002948	1150442	879591	0	21	Pass2	VarMod	Phosphoryl STY(15);Phosphoryl STY(21)	26532458	GDMGIEVPFEMVPVYQKLIISK	GDMGIEVPFEMVPVYQKLIISK	274	22	4.44	128	3	3	0	0	5394564	69637	Identified	539	2.2	y1y3y5y9*y10y10y14	448075	2377	215333907863163	676669539315816	0.0009	Green	33074	26532374	26532388	364577	1751	1751.00	3.50	4
1362	NCDO2118_RS07185	pyruvate kinase 1499467:1500975 reverse MW:54255	Regular	170502700	0	543119936	257	22	33	56.18	2002948	1150442	879591	0	22	Pass2	VarMod	Phosphoryl STY(7)	19169993	GVNIPNTKIPFPALAER	GVNIPNTKIPFPALAER	184	17	10.12	127	2	2	1	0	3235950	67417	Identified	844	1.7	y7y8y12y17-H3PO4	272455	1741	174968075484337	766453836562247	0.0006	Green	21543	19170008	19170037	311440	1199	1199.00	3.00	3
1362	NCDO2118_RS07185	pyruvate kinase 1499467:1500975 reverse MW:54255	Regular	170502700	0	543119936	257	22	33	56.18	2002948	1150442	879591	0	23	Pass2	InSource	None	5052980	SLTGK	LGLSLTGK	158	5	10.10	111	8	8	6	3	209773600	0.0000		3927	0.0	b2b3b3b4b5y1y2y3y3y4y4	159961	473	73395099123788	106790198247576	0.0147	Green	2811	5052964	5052986	204415	29441	29441.00	1.00	1
1362	NCDO2118_RS07185	pyruvate kinase 1499467:1500975 reverse MW:54255	Regular	170502700	0	543119936	257	22	33	56.18	2002948	1150442	879591	0	24	Pass2	InSource	Oxidation M(3)	8064301	NTMRIR	TNTMRIR	493	6	12.40	131	1	1	0	0	669813	0.0000		4591	0.0	y6	32666	733	982868954262199	15657379085244	0.0069	Green	20108	8064250	8064276	305578	13776	13776.00	1.07	1
1362	NCDO2118_RS07185	pyruvate kinase 1499467:1500975 reverse MW:54255	Regular	170502700	0	543119936	257	22	33	56.18	2002948	1150442	879591	0	25	Pass2	InSource	None	6453606	VGFLLD	VGFLLDTK	82	6	3.10	113	1	1	0	0	4552076	0.0000		209	0.0	b3	236898	627	885668763889684	137133752777937	0.0031	Green	8792	6453619	6453644	251159	6297	6297.00	1.00	1
1362	NCDO2118_RS07185	pyruvate kinase 1499467:1500975 reverse MW:54255	Regular	170502700	0	543119936	257	22	33	56.18	2002948	1150442	879591	0	26	Pass2	InSource	None	7424206	GVPVGTGR	VALASGLVESGDNIIIVAGVPVGTGR	484	8	11.05	117	1	1	0	0	238106	0.0000	Missing	40	0.0	y1	389357	685	939478145556335	147895629111267	0.0031	Green	32443	7424155	7424180	361521	6191	6191.00	1.00	1
1362	NCDO2118_RS07185	pyruvate kinase 1499467:1500975 reverse MW:54255	Regular	170502700	0	543119936	257	22	33	56.18	2002948	1150442	879591	0	27	Pass2	InSource	None	6503257	TYNPR	IVVTATNMLESMTYNPR	314	5	9.84	115	1	1	0	0	103006	0.0000	Missing	82	0.0	y1	304715	568	829198532217113	125839706443423	0.0026	Green	22489	6503262	6503287	315306	5131	5131.00	1.00	1
1362	NCDO2118_RS07185	pyruvate kinase 1499467:1500975 reverse MW:54255	Regular	170502700	0	543119936	257	22	33	56.18	2002948	1150442	879591	0	28	Pass2	InSource	None	5863307	PVGTGR	VALASGLVESGDNIIIVAGVPVGTGR	486	6	11.05	117	1	1	0	0	1257457	0.0000	Identified	437	0.0	y6	389357	532	793781042037651	11875620840753	0.0014	Green	32531	5863307	5863331	361955	2847	2847.00	1.00	1
1362	NCDO2118_RS07185	pyruvate kinase 1499467:1500975 reverse MW:54255	Regular	170502700	0	543119936	257	22	33	56.18	2002948	1150442	879591	0	29	Pass2	InSource	None	5492780	YNPR	IVVTATNMLESMTYNPR	315	4	9.84	115	1	1	0	0	1755733	0.0000	Missing	1099	0.0	y4	304715	475	736018460525308	107203692105062	0.0013	Green	22479	5492788	5492811	315272	2629	2629.00	1.00	1
1362	NCDO2118_RS07185	pyruvate kinase 1499467:1500975 reverse MW:54255	Regular	170502700	0	543119936	257	22	33	56.18	2002948	1150442	879591	0	30	Pass2	InSource	None	7813661	MTYNPR	IVVTATNMLESMTYNPR	313	6	9.84	126	2	2	0	0	2075302	0.0000	Identified	1020	0.0	y2y6	304715	692	945867631684957	149173526336991	0.0010	Green	22483	7813642	7813667	315281	1980	1980.00	1.00	1
1362	NCDO2118_RS07185	pyruvate kinase 1499467:1500975 reverse MW:54255	Regular	170502700	0	543119936	257	22	33	56.18	2002948	1150442	879591	0	31	Pass2	InSource	None	8304441	IVVTATNM	IVVTATNMLESMTYNPR	302	8	6.13	115	1	1	0	0	2558879	0.0000		109	0.0	b8y6	304715	807	104795344739875	16959068947975	0.0010	Green	22460	8304408	8304433	315203	1912	1912.00	1.00	1
1362	NCDO2118_RS07185	pyruvate kinase 1499467:1500975 reverse MW:54255	Regular	170502700	0	543119936	257	22	33	56.18	2002948	1150442	879591	0	32	Pass2	InSource	None	4182660	LTGK	LGLSLTGK	159	4	10.10	111	1	1	0	0	10305900	0.0000		111	0.0	y3	159961	400	656346179692648	912692359385296	0.0008	Green	2803	4182636	4182656	204353	1669	1669.00	1.00	1
1362	NCDO2118_RS07185	pyruvate kinase 1499467:1500975 reverse MW:54255	Regular	170502700	0	543119936	257	22	33	56.18	2002948	1150442	879591	0	33	Pass2	InSource	None	9125261	VAGVPVGTGR	VALASGLVESGDNIIIVAGVPVGTGR	482	10	11.05	117	1	1	0	0	7067510	0.0000	Identified	44	0.0	y6	389357	857	109080431890802	178160863781604	0.0007	Green	32549	9125272	9125297	362009	1407	1407.00	1.00	1
1362	NCDO2118_RS07185	pyruvate kinase 1499467:1500975 reverse MW:54255	Regular	170502700	0	543119936	257	22	33	56.18	2002948	1150442	879591	0	34	Pass2	InSource	None	6633573	GANVFR	NIAALIEEGANVFR	48	6	11.05	121	2	2	0	0	1535631	0.0000		544	0.0	b6y6	353073	599	85910091671144	131820183342288	0.0004	Green	39006	6633558	6633583	402801	877	877.00	1.00	1
1362	NCDO2118_RS07185	pyruvate kinase 1499467:1500975 reverse MW:54255	Regular	39615600	0	543119936	70	10	33	29.28	106289	85600	37021	1	1	Pass1	PepFrag1	None	24643770	VALASGLVESGDNIIIVAGVPVGTGR	VALASGLVESGDNIIIVAGVPVGTGR	466	26	4.07	85	31	31	24	9	649318200	84103	Identified	26278	8.8	b2b3b4b5b5b6b7b8b9b10b12b13b14b14*b15b15b16b17b18b20b26y4y5y6y7y8y9y10y11y12y16y17y18y26	392824	2359	214245443756502	102830295837668	0.6482	Green	5507	24643737	24643736	368553	68897	68897.00	2.83	3
1362	NCDO2118_RS07185	pyruvate kinase 1499467:1500975 reverse MW:54255	Regular	39615600	0	543119936	70	10	33	29.28	106289	85600	37021	0	2	Pass1	PepFrag1	None	7043210	DDADIR	DDADIR	201	6	3.59	89	6	6	2	1	10585600	66226		4232	2.4	b4b6y2y4y5y6	61377	612	871486336156241	134297267231248	0.0845	Green	866	7043216	7043239	98744	8986	8986.00	1.00	1
1362	NCDO2118_RS07185	pyruvate kinase 1499467:1500975 reverse MW:54255	Regular	39615600	0	543119936	70	10	33	29.28	106289	85600	37021	0	3	Pass1	PepFrag1	None	13447482	LIVALTESGNTAR	LIVALTESGNTAR	403	13	7.00	80	10	10	8	3	142395300	77514		2494	3.1	b2b3b4y5y6y7y8y9y10y10y11	250105	1271	141858926121739	101858926121739	0.0726	Green	3618	13447471	13447490	229848	7717	7717.00	2.00	2
1362	NCDO2118_RS07185	pyruvate kinase 1499467:1500975 reverse MW:54255	Regular	39615600	0	543119936	70	10	33	29.28	106289	85600	37021	0	4	Pass1	PepFrag1	None	10135778	IPFPALAER	IPFPALAER	192	9	7.00	83	4	4	1	1	11114370	66438	Identified	2208	2.6	b2y6y7y9	246985	954	117163377846316	771633778463164	0.0697	Green	4136	10135727	10135756	275038	7404	7404.00	2.00	2
1362	NCDO2118_RS07185	pyruvate kinase 1499467:1500975 reverse MW:54255	Regular	39615600	0	543119936	70	10	33	29.28	106289	85600	37021	0	5	Pass1	PepFrag1	None	19399616	IVVTATNMLESMTYNPR	IVVTATNMLESMTYNPR	302	17	7.00	84	7	7	3	1	14488790	67589	Missing	533	3.3	b9y3y4y5y7y8y11	311557	1805	179230165172554	139230165172554	0.0657	Green	4822	19399651	19399632	323491	6986	6986.00	2.40	2
1362	NCDO2118_RS07185	pyruvate kinase 1499467:1500975 reverse MW:54255	Regular	39615600	0	543119936	70	10	33	29.28	106289	85600	37021	0	6	Pass1	PepFrag1	None	15168118	NIAALIEEGANVFR	NIAALIEEGANVFR	40	14	4.26	86	4	4	0	0	3615193	61560		443	1.9	b5y6y8y8y10	332970	1419	152667958378682	112667958378682	0.0185	Green	6369	15168155	15168166	413870	1967	1967.00	2.00	2
1362	NCDO2118_RS07185	pyruvate kinase 1499467:1500975 reverse MW:54255	Regular	39615600	0	543119936	70	10	33	29.28	106289	85600	37021	0	7	Pass1	PepFrag1	None	8925138	VGFLLDTK	VGFLLDTK	82	8	6.78	82	1	1	0	0	14903930	67712		137	1.3	y7	249250	855	108910656856658	689106568566584	0.0125	Green	4007	8925053	8925082	264275	1329	1329.00	2.00	2
1362	NCDO2118_RS07185	pyruvate kinase 1499467:1500975 reverse MW:54255	Regular	39615600	0	543119936	70	10	33	29.28	106289	85600	37021	0	8	Pass1	PepFrag1	None	26553294	IENQQGIENLDEIIEAADGIMIAR	IENQQGIENLDEIIEAADGIMIAR	250	24	3.43	88	4	4	1	0	5621177	63477		248	1.9	b8b12y8y9	409009	2475	221212553895603	107475035930402	0.0105	Green	6694	26553253	26553232	445284	1120	1120.00	3.00	3
1362	NCDO2118_RS07185	pyruvate kinase 1499467:1500975 reverse MW:54255	Regular	39615600	0	543119936	70	10	33	29.28	106289	85600	37021	0	9	Pass1	PepFrag1	None	12547416	IVSTLGPAVEIR	IVSTLGPAVEIR	6	12	7.00	81	1	1	0	0	14563480	67611	Missing	125	1.5	y10	274566	1210	137282932554542	972829325545422	0.0103	Green	3869	12547349	12547372	250974	1098	1098.00	2.00	2
1362	NCDO2118_RS07185	pyruvate kinase 1499467:1500975 reverse MW:54255	Regular	39615600	0	543119936	70	10	33	29.28	106289	85600	37021	0	10	Pass1	PepFrag1	None	19230487	FGLSQPGGINFIAISFVR	FGLSQPGGINFIAISFVR	207	18	11.05	87	2	2	0	0	14680560	67646	Identified	323	1.5	y13y18	432761	1811	179627131410996	139627131410996	0.0074	Green	6534	19230582	19230566	427156	785	785.00	2.00	2
1362	NCDO2118_RS07185	pyruvate kinase 1499467:1500975 reverse MW:54255	Regular	13733630	0	543119936	35	9	33	21.91	84062	57084	17472	1	1	Pass1	PepFrag1	None	24643770	VALASGLVESGDNIIIVAGVPVGTGR	VALASGLVESGDNIIIVAGVPVGTGR	466	26	4.07	641	23	23	19	5	260150600	75530	Identified	14983	7.7	b2b3b4b5b6b7b8b9b12b13b14b14b15b16b17b18y6y7y8y9y10y11y12y26	376941	2359	214245443756502	102830295837668	0.5682	Green	14943	24643688	24643667	368604	47764	47764.00	2.89	3
1362	NCDO2118_RS07185	pyruvate kinase 1499467:1500975 reverse MW:54255	Regular	13733630	0	543119936	35	9	33	21.91	84062	57084	17472	0	2	Pass1	PepFrag1	None	13106521	NAQTMLKEYGR	NAQTMLKEYGR	363	11	9.72	644	1	1	0	0	558911	48851		183	2.9	b8*b11	151284	1199	136449649027853	964496490278527	0.0934	Red	4327	13106591	13106611	180380	7849	7849.00	2.00	2
1362	NCDO2118_RS07185	pyruvate kinase 1499467:1500975 reverse MW:54255	Regular	13733630	0	543119936	35	9	33	21.91	84062	57084	17472	0	3	Pass1	PepFrag1	None	13447482	LIVALTESGNTAR	LIVALTESGNTAR	403	13	7.00	640	2	2	0	0	3950601	57344		277	1.7	b2b12y8	220482	1271	141858926121739	101858926121739	0.0175	Green	8729	13447471	13447490	227924	1471	1471.00	2.00	2
1362	NCDO2118_RS07185	pyruvate kinase 1499467:1500975 reverse MW:54255	Regular	13733630	0	543119936	35	9	33	21.91	84062	57084	17472	0	4	Pass2	PepFrag2	Carbamidomethyl C(2)	17088687	ICEETGNPHVQLLAK	ICEETGNPHVQLLAK	235	15	5.30	648	1	1	0	0	613433	49256	Missing	90	1.9	b2y14*	220238	1542	161367430379895	121367430379895	0.0231	Yellow	7115	17088159	17088168	210647	1944	1944.00	2.00	2
1362	NCDO2118_RS07185	pyruvate kinase 1499467:1500975 reverse MW:54255	Regular	13733630	0	543119936	35	9	33	21.91	84062	57084	17472	0	5	Pass2	PepFrag2	None	19389340	GDMGIEVPFEMVPVYQK	GDMGIEVPFEMVPVYQK	274	17	3.83	643	1	1	0	0	639625	49437	Missing	557	1.7	b9y17	364923	1797	178700191922053	138700191922053	0.0152	Yellow	13454	19389195	19389193	306731	1277	1277.00	2.00	2
1362	NCDO2118_RS07185	pyruvate kinase 1499467:1500975 reverse MW:54255	Regular	13733630	0	543119936	35	9	33	21.91	84062	57084	17472	0	6	Pass2	PepFrag2	None	9624612	NAAEAMDIK	NAAEAMDIK	394	9	4.07	647	2	2	0	0	3233835	56475		828	1.4	y4y9	152965	880	111023457736826	182046915473652	0.0149	Yellow	4025	9624437	9624447	177067	1251	1251.00	1.00	1
1362	NCDO2118_RS07185	pyruvate kinase 1499467:1500975 reverse MW:54255	Regular	13733630	0	543119936	35	9	33	21.91	84062	57084	17472	0	7	Pass2	PepFrag2	None	20489883	DAATREFEVEAQNDGVIGK	DAATREFEVEAQNDGVIGK	163	19	3.92	642	1	1	0	0	1246374	52334		159	1.5	b11b12y12*	254842	1861	18291832518074	81945550120493	0.0096	Yellow	11471	20489693	20489696	266220	806	806.00	3.00	3
1362	NCDO2118_RS07185	pyruvate kinase 1499467:1500975 reverse MW:54255	Regular	13733630	0	543119936	35	9	33	21.91	84062	57084	17472	0	8	Pass2	VarMod	Oxidation M(5)	13266470	NAQTMLKEYGR	NAQTMLKEYGR	363	11	9.72	645	3	3	0	0	2526549	55403		229	4.1	b8y1y8y11	151284	1199	136449649027853	964496490278527	0.2372	Yellow	7738	13266423	13266443	217239	19942	19942.00	2.00	2
1362	NCDO2118_RS07185	pyruvate kinase 1499467:1500975 reverse MW:54255	Regular	13733630	0	543119936	35	9	33	21.91	84062	57084	17472	0	9	Pass2	VarMod	Oxidation M(8)	22841424	IVVTATNMLESMTYNPRATR	IVVTATNMLESMTYNPRATR	302	20	9.84	646	1	1	0	0	305487	46228	Missing	166	2.1	b9y9*y12	280104	2113	199079236075698	927194907171321	0.0209	Red	11433	22841268	22841259	265512	1758	1758.00	3.00	3
1362	NCDO2118_RS07185	pyruvate kinase 1499467:1500975 reverse MW:54255	Regular	8668765	0	543119936	28	5	33	19.92	48272	21974	9197	1	1	Pass1	PepFrag1	None	24643770	VALASGLVESGDNIIIVAGVPVGTGR	VALASGLVESGDNIIIVAGVPVGTGR	466	26	4.07	1053	13	13	9	2	139412700	70823	Identified	4916	5.1	b3b7b8b13b14b15b16y6y7y8y9y10y11	360460	2359	214245443756502	102830295837668	0.3196	Green	14544	24643810	24643791	368426	15428	15428.00	2.87	3
1362	NCDO2118_RS07185	pyruvate kinase 1499467:1500975 reverse MW:54255	Regular	8668765	0	543119936	28	5	33	19.92	48272	21974	9197	0	2	Pass1	PepFrag1	None	18088913	TELFADGADAISVVTGDK	TELFADGADAISVVTGDK	95	18	3.50	1052	9	9	3	1	36529420	65006		617	2.9	b5b14y4y7y8y10y11y12y15	300053	1666	169906358587853	129906358587853	0.0976	Green	12000	18088957	18088950	288747	4713	4713.00	2.00	2
1362	NCDO2118_RS07185	pyruvate kinase 1499467:1500975 reverse MW:54255	Regular	8668765	0	543119936	28	5	33	19.92	48272	21974	9197	0	3	Pass1	PepFrag1	None	26553294	IENQQGIENLDEIIEAADGIMIAR	IENQQGIENLDEIIEAADGIMIAR	250	24	3.43	1054	4	4	1	0	2894190	53995		415	2.3	b6b7*b10*b13y8y9	358451	2475	221212553895603	107475035930402	0.0380	Yellow	14779	26553214	26553181	383309	1833	1833.00	3.00	3
1362	NCDO2118_RS07185	pyruvate kinase 1499467:1500975 reverse MW:54255	Regular	8668765	0	543119936	28	5	33	19.92	48272	21974	9197	0	4	Pass2	MissedCleavage	None	22681475	IVVTATNMLESMTYNPRATR	IVVTATNMLESMTYNPRATR	302	20	9.84	1055	0	0	0	0	3049792	54222	Missing	87	1.9	y7*y9*	273455	2113	199079236075698	927194907171321	0.0273	Yellow	11842	22681481	22681475	285807	1318	1318.00	3.00	3
1362	NCDO2118_RS07185	pyruvate kinase 1499467:1500975 reverse MW:54255	Regular	8668765	0	543119936	28	5	33	19.92	48272	21974	9197	0	5	Pass2	VarMod	Phosphoryl STY(*)	12706290	STVTEVVAASVK	STVTEVVAASVK	382	12	7.00	1056	2	2	0	0	1732381	51766		3162	4.6	b12y4y12	195865	1130	131163177712208	911631777122084	0.5175	Yellow	6675	12706293	12706321	219004	24980	24980.00	2.00	2
1362	NCDO2118_RS07185	pyruvate kinase 1499467:1500975 reverse MW:54255	Regular	28559150	0	543119936	81	16	33	36.25	425048	153279	115725	1	1	Pass1	PepFrag1	None	26553294	IENQQGIENLDEIIEAADGIMIAR	IENQQGIENLDEIIEAADGIMIAR	250	24	3.43	484	31	31	26	10	503030000	81573		58047	10.8	b2b4b5b5*b5b6b6*b7b7*b7b8b9b9*b10b10*b11b11*b11b12b12*b13b13*b13b14b15b15*b16b17b18b19y2y3y4y5y6y7y8y8y9y9y10y11y12y13y14y20y24	371176	2475	221212553895603	107475035930402	0.3161	Green	16108	26553250	26553264	443908	134374	134374.00	2.97	3
1362	NCDO2118_RS07185	pyruvate kinase 1499467:1500975 reverse MW:54255	Regular	28559150	0	543119936	81	16	33	36.25	425048	153279	115725	0	2	Pass1	PepFrag1	None	24643770	VALASGLVESGDNIIIVAGVPVGTGR	VALASGLVESGDNIIIVAGVPVGTGR	466	26	4.07	483	11	11	4	1	65104500	72694	Identified	2801	4.1	b6b9b13b14b15y6y8y9y10y12y26	353142	2359	214245443756502	102830295837668	0.0209	Green	14264	24643687	24643706	367854	8888	8888.00	2.87	3
1362	NCDO2118_RS07185	pyruvate kinase 1499467:1500975 reverse MW:54255	Regular	28559150	0	543119936	81	16	33	36.25	425048	153279	115725	0	3	Pass1	PepFrag1	None	17399075	HRPNADILAITFDEK	HRPNADILAITFDEK	420	15	5.28	486	3	3	1	1	10160480	64627	Missing	438	3.0	b7y7y7y8	277179	1612	166214787680525	708098584536835	0.0143	Green	14502	17399014	17399043	373241	6065	6065.00	3.00	3
1362	NCDO2118_RS07185	pyruvate kinase 1499467:1500975 reverse MW:54255	Regular	28559150	0	543119936	81	16	33	36.25	425048	153279	115725	0	4	Pass1	PepFrag1	None	11906627	STVTEVVAASVK	STVTEVVAASVK	382	12	7.00	480	3	3	0	0	5900478	62266		306	2.0	b3y4y6y8	202585	1130	131163177712208	911631777122084	0.0065	Green	4879	11906607	11906629	225600	2767	2767.00	2.00	2
1362	NCDO2118_RS07185	pyruvate kinase 1499467:1500975 reverse MW:54255	Regular	28559150	0	543119936	81	16	33	36.25	425048	153279	115725	0	5	Pass1	PepFrag1	None	19318658	FGESGYWGESLDVEASAK	FGESGYWGESLDVEASAK	22	18	3.69	482	2	2	0	0	2812863	59049		853	2.0	y10y12y18	291237	1718	17342368383482	756157892232132	0.0040	Green	11141	19318538	19318566	309639	1689	1689.00	2.54	3
1362	NCDO2118_RS07185	pyruvate kinase 1499467:1500975 reverse MW:54255	Regular	28559150	0	543119936	81	16	33	36.25	425048	153279	115725	0	6	Pass1	PepFrag1	Carbamidomethyl C(2)	17088687	ICEETGNPHVQLLAK	ICEETGNPHVQLLAK	235	15	5.30	479	2	2	0	0	4634699	61218	Identified	240	1.8	b7y9*y14	227310	1542	161367430379895	6757828691993	0.0038	Green	3521	17088671	17088701	206395	1608	1608.00	3.00	3
1362	NCDO2118_RS07185	pyruvate kinase 1499467:1500975 reverse MW:54255	Regular	28559150	0	543119936	81	16	33	36.25	425048	153279	115725	0	7	Pass1	PepFrag1	None	19389340	GDMGIEVPFEMVPVYQK	GDMGIEVPFEMVPVYQK	274	17	3.83	481	3	3	1	1	7850693	63507	Identified	493	1.5	b6b7y10	352925	1797	178700191922053	138700191922053	0.0019	Green	10087	19389338	19389318	295670	816	816.00	2.00	2
1362	NCDO2118_RS07185	pyruvate kinase 1499467:1500975 reverse MW:54255	Regular	28559150	0	543119936	81	16	33	36.25	425048	153279	115725	0	8	Pass2	PepFrag2	None	20489883	DAATREFEVEAQNDGVIGK	DAATREFEVEAQNDGVIGK	163	19	3.92	485	0	0	0	0	1764761	57024		71	3.9	y10*	243232	1861	18291832518074	14291832518074	0.0236	Green	8308	20489763	20489733	270791	10017	10017.00	2.00	2
1362	NCDO2118_RS07185	pyruvate kinase 1499467:1500975 reverse MW:54255	Regular	28559150	0	543119936	81	16	33	36.25	425048	153279	115725	0	9	Pass2	PepFrag2	None	10135778	IPFPALAER	IPFPALAER	192	9	7.00	494	2	2	0	0	6766586	62861	Identified	257	1.2	y6y8	243314	954	117163377846316	771633778463164	0.0021	Green	8480	10135513	10135539	273117	886	886.00	2.00	2
1362	NCDO2118_RS07185	pyruvate kinase 1499467:1500975 reverse MW:54255	Regular	28559150	0	543119936	81	16	33	36.25	425048	153279	115725	0	10	Pass2	MissedCleavage	None	15968479	YDKSTVTEVVAASVK	YDKSTVTEVVAASVK	379	15	6.95	487	0	0	0	0	1484389	56273		62	1.8	b5	193665	1497	158212515050309	654750100335392	0.0035	Green	2388	15968600	15968630	187616	1506	1506.00	3.00	3
1362	NCDO2118_RS07185	pyruvate kinase 1499467:1500975 reverse MW:54255	Regular	28559150	0	543119936	81	16	33	36.25	425048	153279	115725	0	11	Pass2	VarMod	Phosphoryl STY(4)	26313330	FGLSQPGGINFIAISFVRTANDVK	FGLSQPGGINFIAISFVRTANDVK	207	24	10.12	493	4	4	0	0	2894714	59174	Identified	8576	10.2	b21y5y10y17y19y21*y24	351840	2398	216600316407505	104400210938337	0.2696	Green	13493	26313278	26313292	350015	114606	114606.00	2.65	3
1362	NCDO2118_RS07185	pyruvate kinase 1499467:1500975 reverse MW:54255	Regular	28559150	0	543119936	81	16	33	36.25	425048	153279	115725	0	12	Pass2	VarMod	Phosphoryl STY(*)	12706290	STVTEVVAASVK	STVTEVVAASVK	382	12	7.00	490	9	9	4	3	14473790	66163		35043	6.9	b8b8b10b10b11b11b12b12y1y2y4y4y11y11y12	202585	1130	131163177712208	911631777122084	0.1843	Green	4528	12706261	12706280	221186	78346	78346.00	1.99	2
1362	NCDO2118_RS07185	pyruvate kinase 1499467:1500975 reverse MW:54255	Regular	28559150	0	543119936	81	16	33	36.25	425048	153279	115725	0	13	Pass2	VarMod	Phosphoryl STY(1)	12706290	STVTEVVAASVK	STVTEVVAASVK	382	12	7.00	491	4	4	0	1	4329609	60922		7561	6.1	b8b10b11y2y4y12	202585	1130	131163177712208	911631777122084	0.1293	Green	4362	12706282	12706302	219108	54954	54954.00	2.00	2
1362	NCDO2118_RS07185	pyruvate kinase 1499467:1500975 reverse MW:54255	Regular	28559150	0	543119936	81	16	33	36.25	425048	153279	115725	0	14	Pass2	VarMod	Oxidation M(21)	26713243	IENQQGIENLDEIIEAADGIMIAR	IENQQGIENLDEIIEAADGIMIAR	250	24	3.43	488	4	4	1	1	7032931	63029		410	3.0	b12b13y7y11	371176	2475	221212553895603	107475035930402	0.0093	Green	15182	26713153	26713166	393284	3932	3932.00	2.90	3
1362	NCDO2118_RS07185	pyruvate kinase 1499467:1500975 reverse MW:54255	Regular	28559150	0	543119936	81	16	33	36.25	425048	153279	115725	0	15	Pass2	VarMod	Phosphoryl STY(*)	12706290	STVTEVVAASVK	STVTEVVAASVK	382	12	7.00	492	2	2	0	0	3983155	60560		461	2.3	y7y9	202585	1130	131163177712208	911631777122084	0.0086	Green	4939	12706318	12706337	226271	3674	3674.00	2.00	2
1362	NCDO2118_RS07185	pyruvate kinase 1499467:1500975 reverse MW:54255	Regular	28559150	0	543119936	81	16	33	36.25	425048	153279	115725	0	16	Pass2	VarMod	Oxidation M(11)	19549289	GDMGIEVPFEMVPVYQK	GDMGIEVPFEMVPVYQK	274	17	3.83	489	1	1	0	0	4000513	60579	Identified	106	1.6	y10*y13	352925	1797	178700191922053	138700191922053	0.0022	Green	10490	19549355	19549334	301412	920	920.00	2.00	2
1362	NCDO2118_RS07185	pyruvate kinase 1499467:1500975 reverse MW:54255	Regular	170225200	0	543119936	258	26	33	61.55	1281694	730215	588920	1	1	Pass1	PepFrag1	None	24643770	VALASGLVESGDNIIIVAGVPVGTGR	VALASGLVESGDNIIIVAGVPVGTGR	466	26	4.07	87	38	38	31	14	675393800	90606	Identified	147591	15.3	b2b3b4b5b5b6b6b7b7b8b9b10b10b11b12b13b14b14*b14b15b15*b15b16b16*b17b17b18b18*b19b20b20y1y2y3y4y5y6y7y8y9y10y11y12y13y14*y16y17y18y18*y19y19*y22y24y26	400266	2359	214245443756502	102830295837668	0.2492	Green	27232	24643884	24643875	363917	319412	319412.00	2.69	3
1362	NCDO2118_RS07185	pyruvate kinase 1499467:1500975 reverse MW:54255	Regular	170225200	0	543119936	258	26	33	61.55	1281694	730215	588920	0	2	Pass1	PepFrag1	None	19399616	IVVTATNMLESMTYNPR	IVVTATNMLESMTYNPR	302	17	7.00	84	27	27	23	10	1628400000	94428	Identified	63345	11.5	b2b3b4b4b5b5b6b6b7b7b8b8b9b10b11b11b12b14b15b17y3y3*y4y5y6y7y7*y7y8y8y9y9y10y10*y11y12y12*y12y13y13*y13y14y14y15y15*y16y16*y17	310814	1805	179230165172554	139230165172554	0.1749	Green	17828	19399615	19399608	316987	224138	224138.00	2.32	2
1362	NCDO2118_RS07185	pyruvate kinase 1499467:1500975 reverse MW:54255	Regular	170225200	0	543119936	258	26	33	61.55	1281694	730215	588920	0	3	Pass1	PepFrag1	None	8925138	VGFLLDTK	VGFLLDTK	82	8	6.78	82	15	15	13	6	970597400	92181		126784	8.0	b2b3b4b5b6b6b7b8y1y2y2y3y3y4y4y5y6y7y7y8	242428	855	108910656856658	177821313713317	0.1456	Green	6693	8925142	8925160	253748	186665	186665.00	1.19	1
1362	NCDO2118_RS07185	pyruvate kinase 1499467:1500975 reverse MW:54255	Regular	170225200	0	543119936	258	26	33	61.55	1281694	730215	588920	0	4	Pass1	PepFrag1	None	31264832	GLMINWGVIPTMTEKPSSTDDMFEVAEK	GLMINWGVIPTMTEKPSSTDDMFEVAEK	438	28	3.92	88	19	19	10	6	147673900	84003	Identified	66893	10.3	b3b4b5b6b6*b7b7*b8b9b9*b12*b12b18b28y3y11y13y17y19y20y22y23y24y25y28	428457	2895	245579444639063	123719629759375	0.0782	Green	30916	31264982	31264899	385666	100225	100225.00	2.97	3
1362	NCDO2118_RS07185	pyruvate kinase 1499467:1500975 reverse MW:54255	Regular	170225200	0	543119936	258	26	33	61.55	1281694	730215	588920	0	5	Pass1	PepFrag1	None	13447482	LIVALTESGNTAR	LIVALTESGNTAR	403	13	7.00	80	20	20	16	7	1082295000	92654		46935	7.2	b2b3b4b5b6b6b7b7b10b13y2y3y4y5y6y7y7*y8y8y9y9*y9y10y10*y10y11y11y12y13	231088	1271	141858926121739	101858926121739	0.0626	Green	3696	13447437	13447459	224825	80260	80260.00	1.98	2
1362	NCDO2118_RS07185	pyruvate kinase 1499467:1500975 reverse MW:54255	Regular	170225200	0	543119936	258	26	33	61.55	1281694	730215	588920	0	6	Pass1	PepFrag1	None	12547416	IVSTLGPAVEIR	IVSTLGPAVEIR	6	12	7.00	81	11	11	6	3	254200600	86362	Identified	26084	6.7	b2b3b4b4b5b5b12b12y3y6y7y8y9y10y10y11	261334	1210	137282932554542	972829325545422	0.0560	Green	5560	12547414	12547438	244457	71783	71783.00	1.99	2
1362	NCDO2118_RS07185	pyruvate kinase 1499467:1500975 reverse MW:54255	Regular	170225200	0	543119936	258	26	33	61.55	1281694	730215	588920	0	7	Pass1	PepFrag1	None	7884876	LGLSLTGK	LGLSLTGK	155	8	10.10	79	13	13	10	4	286543300	86882		35613	5.6	b3b4b4b5b5b6b6b7b8b8y1y2y3y3y4y4y5y5y6y6y7y8	165218	769	101479237201927	162958474403854	0.0518	Green	2165	7884871	7884890	205885	66431	66431.00	1.28	1
1362	NCDO2118_RS07185	pyruvate kinase 1499467:1500975 reverse MW:54255	Regular	170225200	0	543119936	258	26	33	61.55	1281694	730215	588920	0	8	Pass1	PepFrag1	None	15168118	NIAALIEEGANVFR	NIAALIEEGANVFR	40	14	4.26	89	19	19	14	6	210529800	85543		25520	6.8	b2b3b4b4*b5b5*b6b6*b7b7*b11*b12b14y3y4y5y6y7y8y8y9y10y11y12y12*y14	356006	1419	152667958378682	112667958378682	0.0503	Green	32892	15168146	15168162	403785	64473	64473.00	2.06	2
1362	NCDO2118_RS07185	pyruvate kinase 1499467:1500975 reverse MW:54255	Regular	170225200	0	543119936	258	26	33	61.55	1281694	730215	588920	0	9	Pass1	PepFrag1	None	19230487	FGLSQPGGINFIAISFVR	FGLSQPGGINFIAISFVR	207	18	11.05	90	16	16	7	4	244800600	86198	Identified	18833	6.2	b4b4b5b5*b6*b8*b9b9b11b12b15b18y3y4y5y6y7y7y8y12y13y14y15y18	415749	1811	179627131410996	139627131410996	0.0297	Green	34389	19230421	19230416	422131	38076	38076.00	2.10	2
1362	NCDO2118_RS07185	pyruvate kinase 1499467:1500975 reverse MW:54255	Regular	170225200	0	543119936	258	26	33	61.55	1281694	730215	588920	0	10	Pass1	PepFrag1	Carbamidomethyl C(2)	17088687	ICEETGNPHVQLLAK	ICEETGNPHVQLLAK	235	15	5.30	78	6	6	1	0	10891090	72681	Missing	1077	3.5	b2b5y6y11y12y14y14y15	196287	1542	161367430379895	6757828691993	0.0074	Green	1248	17088626	17088664	182402	9530	9530.00	2.96	3
1362	NCDO2118_RS07185	pyruvate kinase 1499467:1500975 reverse MW:54255	Regular	170225200	0	543119936	258	26	33	61.55	1281694	730215	588920	0	11	Pass1	PepFrag1	None	10135778	IPFPALAER	IPFPALAER	192	9	7.00	83	3	3	1	0	14767550	74003	Identified	1915	2.6	y6y8y9	238264	954	117163377846316	771633778463164	0.0057	Green	9376	10135817	10135845	272727	7304	7304.00	1.92	2
1362	NCDO2118_RS07185	pyruvate kinase 1499467:1500975 reverse MW:54255	Regular	170225200	0	543119936	258	26	33	61.55	1281694	730215	588920	0	12	Pass1	PepFrag1	None	26553294	IENQQGIENLDEIIEAADGIMIAR	IENQQGIENLDEIIEAADGIMIAR	250	24	3.43	91	9	9	3	1	16582550	74507		1721	3.7	b2b7b8b12b13b16b20y7y7y8y11y13	421539	2475	221212553895603	107475035930402	0.0055	Green	36018	26553387	26553360	441832	6992	6992.00	2.66	3
1362	NCDO2118_RS07185	pyruvate kinase 1499467:1500975 reverse MW:54255	Regular	170225200	0	543119936	258	26	33	61.55	1281694	730215	588920	0	13	Pass1	PepFrag1	None	19389340	GDMGIEVPFEMVPVYQK	GDMGIEVPFEMVPVYQK	274	17	3.83	86	6	6	2	2	41775690	78519	Identified	2065	2.6	b5b6b7b7y10y12y15	384240	1797	178700191922053	138700191922053	0.0030	Green	26454	19389400	19389393	359723	3790	3790.00	2.00	2
1362	NCDO2118_RS07185	pyruvate kinase 1499467:1500975 reverse MW:54255	Regular	170225200	0	543119936	258	26	33	61.55	1281694	730215	588920	0	14	Pass1	PepFrag1	None	8054236	NAQTMLK	NAQTMLK	363	7	10.10	92	3	3	1	0	8731100	71721		1068	1.3	y4y4y5y7	131385	753	100066709325229	160133418650458	0.0011	Green	5248	8054208	8054227	242108	1439	1439.00	1.00	1
1362	NCDO2118_RS07185	pyruvate kinase 1499467:1500975 reverse MW:54255	Regular	170225200	0	543119936	258	26	33	61.55	1281694	730215	588920	0	15	Pass1	PepFrag1	None	17399075	HRPNADILAITFDEK	HRPNADILAITFDEK	420	15	5.28	85	2	2	0	0	3169874	67321	Missing	467	1.7	b7b12y2y5	268646	1612	166214787680525	708098584536835	0.0011	Green	21366	17398953	17398990	332871	1397	1397.00	3.00	3
1362	NCDO2118_RS07185	pyruvate kinase 1499467:1500975 reverse MW:54255	Regular	170225200	0	543119936	258	26	33	61.55	1281694	730215	588920	0	16	Pass1	PepFrag1	None	11906627	STVTEVVAASVK	STVTEVVAASVK	382	12	7.00	93	1	1	0	0	2568545	66407		76	1.3	y5y6	223130	1130	131163177712208	911631777122084	0.0006	Green	23719	11906591	11906617	345425	824	824.00	2.00	2
1362	NCDO2118_RS07185	pyruvate kinase 1499467:1500975 reverse MW:54255	Regular	170225200	0	543119936	258	26	33	61.55	1281694	730215	588920	0	17	Pass2	MissedCleavage	None	24933132	GDMGIEVPFEMVPVYQKLIISK	GDMGIEVPFEMVPVYQKLIISK	274	22	4.44	95	0	0	0	0	2531853	66345	Identified	119	2.9	b14y10*	454096	2377	215333907863163	175333907863163	0.0031	Green	39618	24933361	24933305	506728	3936	3936.00	2.00	2
1362	NCDO2118_RS07185	pyruvate kinase 1499467:1500975 reverse MW:54255	Regular	170225200	0	543119936	258	26	33	61.55	1281694	730215	588920	0	18	Pass2	MissedCleavage	None	22881915	NAAEAMDIKLIVALTESGNTAR	NAAEAMDIKLIVALTESGNTAR	394	22	4.44	96	1	1	0	0	2539055	66357		1233	2.4	b14*b15y10y22	364761	2151	201458953880691	943059692537937	0.0018	Green	29938	22881769	22881775	379355	2283	2283.00	2.59	3
1362	NCDO2118_RS07185	pyruvate kinase 1499467:1500975 reverse MW:54255	Regular	170225200	0	543119936	258	26	33	61.55	1281694	730215	588920	0	19	Pass2	MissedCleavage	None	26083518	DDADIRFGLSQPGGINFIAISFVR	DDADIRFGLSQPGGINFIAISFVR	201	24	4.17	94	0	0	0	0	7043793	70788	Identified	32	2.1	b11	436206	2423	218103136075778	105402090717185	0.0012	Green	36825	26083766	26083744	452471	1521	1521.00	2.49	3
1362	NCDO2118_RS07185	pyruvate kinase 1499467:1500975 reverse MW:54255	Regular	170225200	0	543119936	258	26	33	61.55	1281694	730215	588920	0	20	Pass2	VarMod	Oxidation M(4)	9074778	TNTMRIR	TNTMRIR	492	7	12.40	103	2	2	0	0	2190087	65715		5132	2.9	b6y4y7y7*	49047	826	10643382394892	172867647897841	0.0095	Green	15514	9074736	9074753	307345	12191	12191.00	1.20	1
1362	NCDO2118_RS07185	pyruvate kinase 1499467:1500975 reverse MW:54255	Regular	170225200	0	543119936	258	26	33	61.55	1281694	730215	588920	0	21	Pass2	VarMod	Oxidation M(15)	22121100	AGKIVVTATNMLESMTYNPR	AGKIVVTATNMLESMTYNPR	299	20	9.72	101	2	2	0	0	2832661	66832	Missing	80	2.9	y3y8	312158	2055	195419329268253	902795528455023	0.0035	Green	12594	22121222	22121233	292225	4501	4501.00	3.48	3
1362	NCDO2118_RS07185	pyruvate kinase 1499467:1500975 reverse MW:54255	Regular	170225200	0	543119936	258	26	33	61.55	1281694	730215	588920	0	22	Pass2	VarMod	Phosphoryl STY(*);Phosphoryl STY(*)	42711386	STPELIALNVAGGLDIFDDVEIGQTILIDDGKLGLSLTGK	STPELIALNVAGGLDIFDDVEIGQTILIDDGKLGLSLTGK	123	40	3.57	100	4	4	0	0	6939427	70723	Missing	1289	3.5	b13-H3PO4b21y10y13y14y15y18y21y40	515419	3923	300726596821578	160484397881052	0.0028	Green	34701	42711478	42711195	425439	3621	3621.00	3.34	3
1362	NCDO2118_RS07185	pyruvate kinase 1499467:1500975 reverse MW:54255	Regular	170225200	0	543119936	258	26	33	61.55	1281694	730215	588920	0	23	Pass2	VarMod	Oxidation M(6)	23041864	NAAEAMDIKLIVALTESGNTAR	NAAEAMDIKLIVALTESGNTAR	394	22	4.44	102	2	2	0	0	2949867	67008		717	2.5	b16*y9*y11*y12y13y17*y22	364761	2151	201458953880691	161458953880691	0.0020	Green	39595	23041940	23041904	506647	2601	2601.00	2.00	2
1362	NCDO2118_RS07185	pyruvate kinase 1499467:1500975 reverse MW:54255	Regular	170225200	0	543119936	258	26	33	61.55	1281694	730215	588920	0	24	Pass2	VarMod	Oxidation M(8)	19559565	IVVTATNMLESMTYNPR	IVVTATNMLESMTYNPR	302	17	7.00	97	1	1	0	0	866664	61689	Missing	427	2.2	b6b13*y15	310814	1805	179230165172554	794867767817027	0.0020	Green	17806	19559547	19559574	316921	2526	2526.00	3.00	3
1362	NCDO2118_RS07185	pyruvate kinase 1499467:1500975 reverse MW:54255	Regular	170225200	0	543119936	258	26	33	61.55	1281694	730215	588920	0	25	Pass2	VarMod	Phosphoryl STY(9)	13906184	NAQTMLKEYGR	NAQTMLKEYGR	363	11	9.72	98	1	1	0	0	989614	62265		540	1.7	b4*b7b8y5	141105	1199	136449649027853	964496490278527	0.0015	Green	23637	13906095	13906115	344959	1889	1889.00	2.00	2
1362	NCDO2118_RS07185	pyruvate kinase 1499467:1500975 reverse MW:54255	Regular	170225200	0	543119936	258	26	33	61.55	1281694	730215	588920	0	26	Pass2	VarMod	Oxidation M(12)	31424781	GLMINWGVIPTMTEKPSSTDDMFEVAEK	GLMINWGVIPTMTEKPSSTDDMFEVAEK	438	28	3.92	99	1	1	0	0	1224670	63190	Missing	137	2.1	y24	428457	2895	245579444639063	123719629759375	0.0011	Green	30928	31424921	31424835	385737	1349	1349.00	3.00	3
1362	NCDO2118_RS07185	pyruvate kinase 1499467:1500975 reverse MW:54255	Regular	170225200	0	543119936	258	26	33	61.55	1281694	730215	588920	0	27	Pass2	InSource	None	6183821	LSLTGK	LGLSLTGK	157	6	10.10	79	6	6	4	1	81328670	0.0000		2188	0.0	b2b2b3b4y2y3y3y4y5y5y6	165218	597	85718755065108	131437510130216	0.0142	Green	2174	6183824	6183843	205970	18249	18249.00	1.00	1
1362	NCDO2118_RS07185	pyruvate kinase 1499467:1500975 reverse MW:54255	Regular	170225200	0	543119936	258	26	33	61.55	1281694	730215	588920	0	28	Pass2	InSource	None	5052980	SLTGK	LGLSLTGK	158	5	10.10	79	7	7	4	1	111117400	0.0000		2474	0.0	b2b4b5b5y2y3y3y4y5	165218	473	73395099123788	106790198247576	0.0087	Green	2176	5052953	5052970	205994	11090	11090.00	1.00	1
1362	NCDO2118_RS07185	pyruvate kinase 1499467:1500975 reverse MW:54255	Regular	170225200	0	543119936	258	26	33	61.55	1281694	730215	588920	0	29	Pass2	InSource	None	7083927	NIAALIE	NIAALIEEGANVFR	40	7	3.31	89	2	2	0	0	2097771	0.0000		908	0.0	b2b7*y3	356006	711	963102923907379	152620584781476	0.0055	Green	32882	7083942	7083962	403711	7067	7067.00	1.00	1
1362	NCDO2118_RS07185	pyruvate kinase 1499467:1500975 reverse MW:54255	Regular	170225200	0	543119936	258	26	33	61.55	1281694	730215	588920	0	30	Pass2	InSource	None	4762715	LDTK	VGFLLDTK	86	4	6.78	82	6	6	3	1	185794700	0.0000		1092	0.0	b2b4y1y2y2y3y3y4	242428	443	702579464350205	100515892870041	0.0053	Green	6687	4762705	4762722	253707	6787	6787.00	1.00	1
1362	NCDO2118_RS07185	pyruvate kinase 1499467:1500975 reverse MW:54255	Regular	170225200	0	543119936	258	26	33	61.55	1281694	730215	588920	0	31	Pass2	InSource	None	7424206	GVPVGTGR	VALASGLVESGDNIIIVAGVPVGTGR	484	8	11.05	87	0	0	0	0	728834	0.0000	Missing	0	0.0		400266	685	939478145556335	147895629111267	0.0045	Green	27169	7424173	7424193	363545	5721	5721.00	1.00	1
1362	NCDO2118_RS07185	pyruvate kinase 1499467:1500975 reverse MW:54255	Regular	170225200	0	543119936	258	26	33	61.55	1281694	730215	588920	0	32	Pass2	InSource	None	6453606	VGFLLD	VGFLLDTK	82	6	3.10	82	2	2	1	0	5975750	0.0000		245	0.0	b3b4	242428	627	885668763889684	137133752777937	0.0028	Green	6668	6453619	6453638	253636	3625	3625.00	1.00	1
1362	NCDO2118_RS07185	pyruvate kinase 1499467:1500975 reverse MW:54255	Regular	170225200	0	543119936	258	26	33	61.55	1281694	730215	588920	0	33	Pass2	InSource	None	5863307	PVGTGR	VALASGLVESGDNIIIVAGVPVGTGR	486	6	11.05	87	1	1	0	0	896818	0.0000	Identified	399	0.0	y6	400266	532	793781042037651	11875620840753	0.0019	Green	27243	5863267	5863286	363970	2490	2490.00	1.00	1
1362	NCDO2118_RS07185	pyruvate kinase 1499467:1500975 reverse MW:54255	Regular	170225200	0	543119936	258	26	33	61.55	1281694	730215	588920	0	34	Pass2	InSource	None	8683982	SMTYNPR	IVVTATNMLESMTYNPR	312	7	9.84	84	4	4	1	0	11489270	0.0000	Identified	1409	0.0	b6y2y4y5y5*y7	310814	765	101127031163723	162254062327446	0.0015	Green	17856	8684018	8684037	317047	1911	1911.00	1.26	1
1362	NCDO2118_RS07185	pyruvate kinase 1499467:1500975 reverse MW:54255	Regular	170225200	0	543119936	258	26	33	61.55	1281694	730215	588920	0	35	Pass2	InSource	None	7414254	GPAVEIR	IVSTLGPAVEIR	11	7	7.00	81	3	3	1	0	13783510	0.0000	Identified	2191	0.0	y1y4y6y6y7	261334	691	944956171580674	148991234316135	0.0010	Green	5507	7414228	7414247	244175	1237	1237.00	1.00	1
1362	NCDO2118_RS07185	pyruvate kinase 1499467:1500975 reverse MW:54255	Regular	170225200	0	543119936	258	26	33	61.55	1281694	730215	588920	0	36	Pass2	InSource	None	9125261	VAGVPVGTGR	VALASGLVESGDNIIIVAGVPVGTGR	482	10	11.05	87	1	1	0	0	1227098	0.0000	Missing	810	0.0	y10	400266	857	109080431890802	178160863781604	0.0009	Green	27217	9125301	9125319	363858	1191	1191.00	1.00	1
1362	NCDO2118_RS07185	pyruvate kinase 1499467:1500975 reverse MW:54255	Regular	170225200	0	543119936	258	26	33	61.55	1281694	730215	588920	0	37	Pass2	InSource	None	5492780	YNPR	IVVTATNMLESMTYNPR	315	4	9.84	84	3	3	0	0	2538443	0.0000	Missing	574	0.0	b4y1y4	310814	475	736018460525308	107203692105062	0.0009	Green	17849	5492750	5492768	317039	1160	1160.00	1.00	1
1362	NCDO2118_RS07185	pyruvate kinase 1499467:1500975 reverse MW:54255	Regular	170225200	0	543119936	258	26	33	61.55	1281694	730215	588920	0	38	Pass2	InSource	None	8353904	TESGNTAR	LIVALTESGNTAR	408	8	7.00	80	1	1	0	0	1548666	0.0000		813	0.0	y8	231088	727	977498068907836	155499613781567	0.0009	Green	3715	8353918	8353937	224964	1118	1118.00	1.00	1
1362	NCDO2118_RS07185	pyruvate kinase 1499467:1500975 reverse MW:54255	Regular	170225200	0	543119936	258	26	33	61.55	1281694	730215	588920	0	39	Pass2	InSource	None	8304441	IVVTATNM	IVVTATNMLESMTYNPR	302	8	6.13	84	0	0	0	0	1246905	0.0000		124	0.0	b8*b8	310814	807	104795344739875	16959068947975	0.0007	Green	17893	8304431	8304450	317144	891	891.00	1.00	1
1362	NCDO2118_RS07185	pyruvate kinase 1499467:1500975 reverse MW:54255	Regular	2326454	1.3	543119936	28	5	33	8.17	41683	40177.5	5965	1	1	Pass1	PepFrag1	Carbamidomethyl C(2)	17088687	ICEETGNPHVQLLAK	ICEETGNPHVQLLAK	235	15	5.30	273	14	14	8	1	42224050	59923	Identified	4117	4.9	b2b11y1y2y3y5y6y7y8y10y11y12y13y13y14*y15	196843	1542	161367430379895	6757828691993	0.5736	Green	2403	17088559	17088605	196843	23909	23909.00	2.91	3
1362	NCDO2118_RS07185	pyruvate kinase 1499467:1500975 reverse MW:54255	Regular	2326454	1.3	543119936	28	5	33	8.17	41683	40177.5	5965	0	2	Pass1	PepFrag1	None	24643770	VALASGLVESGDNIIIVAGVPVGTGR	VALASGLVESGDNIIIVAGVPVGTGR	466	26	4.07	271	6	6	2	1	19576370	56584	Identified	643	2.7	b14b15y6y8y10y11	368650	2359	214245443756502	102830295837668	0.0690	Green	6758	24643772	24643771	368650	2876	2876.00	3.00	3
1362	NCDO2118_RS07185	pyruvate kinase 1499467:1500975 reverse MW:54255	Regular	2326454	1.3	543119936	28	5	33	8.17	41683	40177.5	5965	0	3	Pass2	PepFrag2	None	20489883	DAATREFEVEAQNDGVIGK	DAATREFEVEAQNDGVIGK	163	19	3.92	272	4	4	0	0	1343879	44951		686	3.1	b6b19*y7y10y19	264326	1861	18291832518074	81945550120493	0.1318	Red	4777	20489665	20489695	264326	5495	5495.00	3.00	3
1362	NCDO2118_RS07185	pyruvate kinase 1499467:1500975 reverse MW:54255	Regular	2326454	1.3	543119936	28	5	33	8.17	41683	40177.5	5965	0	4	Pass2	MissedCleavage	None	22681475	IVVTATNMLESMTYNPRATR	IVVTATNMLESMTYNPRATR	302	20	9.84	275	0	0	0	0	698339	42108	Missing	133	3.1	y9y12	271461	2113	199079236075698	927194907171321	0.1290	Red	4936	22681252	22681266	271461	5376	5376.00	3.00	3
1362	NCDO2118_RS07185	pyruvate kinase 1499467:1500975 reverse MW:54255	Regular	2326454	1.3	543119936	28	5	33	8.17	41683	40177.5	5965	0	5	Pass2	MissedCleavage	None	10986266	QKGVNIPNTK	QKGVNIPNTK	182	10	10.60	274	4	4	1	0	521661	40841	Missing	386	2.2	b10y1y8y9y9	210135	1036	123784463240813	837844632408126	0.0966	Red	2868	10986125	10986159	210135	4027	4027.00	2.00	2
1363	NCDO2118_RS07190	ATP-dependent 6-phosphofructokinase 1501063:1502085 reverse MW:35806	Regular	5193208	0	358627035	19	5	23	20.59	15649	13857	5082	1	1	Pass1	PepFrag1	None	42181129	LTEHGFPAVGLPGTIDNDIVGTDFTIGFDTAVSTVVDALDK	LTEHGFPAVGLPGTIDNDIVGTDFTIGFDTAVSTVVDALDK	111	41	3.53	449	10	10	4	0	25040600	61141	Identified	1522	4.3	b6b10b11b11b14b26*b31*y6y7y8y10y12y13	447617	3930	301084224596082	110542112298041	0.3928	Yellow	9448	42181151	42181151	509960	6147	6147.00	3.72	4
1363	NCDO2118_RS07190	ATP-dependent 6-phosphofructokinase 1501063:1502085 reverse MW:35806	Regular	5193208	0	358627035	19	5	23	20.59	15649	13857	5082	0	2	Pass1	PepFrag1	None	20200386	YPEFAQVEGQLAGIEQLK	YPEFAQVEGQLAGIEQLK	72	18	3.96	448	7	7	1	0	21615410	60502	Missing	2947	3.1	b6b10b18y6y7y10y18	337574	1877	183965258881789	826435059211928	0.3838	Yellow	6915	20200330	20200351	342371	6006	6006.00	2.53	3
1363	NCDO2118_RS07190	ATP-dependent 6-phosphofructokinase 1501063:1502085 reverse MW:35806	Regular	5193208	0	358627035	19	5	23	20.59	15649	13857	5082	0	3	Pass1	PepFrag1	None	10135738	DGIGGVAVGIR	DGIGGVAVGIR	277	11	7.00	447	2	2	1	0	29459560	61847		502	1.7	y7y8	205999	956	117327071037588	773270710375882	0.1089	Yellow	5278	10135729	10135750	228902	1704	1704.00	2.00	2
1363	NCDO2118_RS07190	ATP-dependent 6-phosphofructokinase 1501063:1502085 reverse MW:35806	Regular	5193208	0	358627035	19	5	23	20.59	15649	13857	5082	0	4	Pass2	PepFrag2	None	17138952	IAVLTSGGDAPGMNAAIR	IAVLTSGGDAPGMNAAIR	3	18	7.00	451	0	0	0	0	1438546	48734	Missing	35	1.5	b16	291578	1604	165664406959219	125664406959219	0.0519	Red	8158	17139088	17139076	413516	812	812.00	2.00	2
1363	NCDO2118_RS07190	ATP-dependent 6-phosphofructokinase 1501063:1502085 reverse MW:35806	Regular	5193208	0	358627035	19	5	23	20.59	15649	13857	5082	0	5	Pass2	MissedCleavage	None	24372908	NHHIIVLAEGVMTGEEFATKLK	NHHIIVLAEGVMTGEEFATKLK	213	22	6.04	450	0	0	0	0	3005576	51934		76	1.7	b10*	373202	2310	211268275550397	100845517033598	0.0626	Red	7056	24372777	24372760	351879	980	980.00	3.00	3
1363	NCDO2118_RS07190	ATP-dependent 6-phosphofructokinase 1501063:1502085 reverse MW:35806	Regular	39577030	0	358627035	52	5	23	29.41	304455	267718	281460	1	1	Pass1	PepFrag1	None	10135738	DGIGGVAVGIR	DGIGGVAVGIR	277	11	7.00	378	21	21	19	9	1064039000	86244		254751	10.0	b2b3b3b4b4b5b5b6b6b7b8b8b9b10b11b11y1y2y3y4y5y6y7y8y9y10y11	214891	956	117327071037588	194654142075176	0.7795	Green	9972	10135757	10135765	226181	237313	237313.00	1.61	1
1363	NCDO2118_RS07190	ATP-dependent 6-phosphofructokinase 1501063:1502085 reverse MW:35806	Regular	39577030	0	358627035	52	5	23	29.41	304455	267718	281460	0	2	Pass1	PepFrag1	None	7004352	AVELLR	AVELLR	271	6	7.00	381	9	9	6	3	152494000	77807		17413	3.7	b2b3b4b5b6y1y2y3y6	185662	677	932149161649599	14642983232992	0.0903	Green	5877	7004346	7004361	191903	27491	27491.00	1.00	1
1363	NCDO2118_RS07190	ATP-dependent 6-phosphofructokinase 1501063:1502085 reverse MW:35806	Regular	39577030	0	358627035	52	5	23	29.41	304455	267718	281460	0	3	Pass1	PepFrag1	Carbamidomethyl C(19)	22691129	NAGDIALNAGIAAGADDICIPEK	NAGDIALNAGIAAGADDICIPEK	171	23	3.50	379	4	4	0	0	14041840	67449	Identified	1048	2.4	b11b13*b13y3y11y23	317551	2051	1951656614265	901104409510003	0.0071	Green	15830	22691025	22691015	294527	2159	2159.00	2.50	3
1363	NCDO2118_RS07190	ATP-dependent 6-phosphofructokinase 1501063:1502085 reverse MW:35806	Regular	39577030	0	358627035	52	5	23	29.41	304455	267718	281460	0	4	Pass2	PepFrag2	None	42181129	LTEHGFPAVGLPGTIDNDIVGTDFTIGFDTAVSTVVDALDK	LTEHGFPAVGLPGTIDNDIVGTDFTIGFDTAVSTVVDALDK	111	41	3.53	380	6	6	2	0	12532400	66955	Identified	871	3.3	b10b11b16y6y9y10y10y15	388325	3930	301084224596082	110542112298041	0.0096	Green	20415	42181558	42181558	509696	2914	2914.00	4.00	4
1363	NCDO2118_RS07190	ATP-dependent 6-phosphofructokinase 1501063:1502085 reverse MW:35806	Regular	39577030	0	358627035	52	5	23	29.41	304455	267718	281460	0	5	Pass2	VarMod	Phosphoryl STY(*)	19499626	RIAVLTSGGDAPGMNAAIR	RIAVLTSGGDAPGMNAAIR	2	19	10.89	382	0	0	0	0	2225910	59450	Missing	96	2.0	b9y5*	229742	1752	175704291367449	135704291367449	0.0057	Green	17561	19499653	19499622	328888	1747	1747.00	2.00	2
1363	NCDO2118_RS07190	ATP-dependent 6-phosphofructokinase 1501063:1502085 reverse MW:35806	Regular	39577030	0	358627035	52	5	23	29.41	304455	267718	281460	0	6	Pass2	InSource	None	5153300	AVGIR	DGIGGVAVGIR	283	5	11.05	378	7	7	4	1	50561070	0.0000		6319	0.0	b3b4b5y1y3y4y5	214891	492	75347648430133	110695296860266	0.0685	Green	9971	5153288	5153303	226172	20846	20846.00	1.00	1
1363	NCDO2118_RS07190	ATP-dependent 6-phosphofructokinase 1501063:1502085 reverse MW:35806	Regular	39577030	0	358627035	52	5	23	29.41	304455	267718	281460	0	7	Pass2	InSource	None	4992511	DGIGGV	DGIGGVAVGIR	277	6	3.10	378	1	1	0	0	3191555	0.0000		66	0.0	b5	214891	464	724611053362086	104922210672417	0.0102	Green	9988	4992495	4992509	226233	3119	3119.00	1.00	1
1363	NCDO2118_RS07190	ATP-dependent 6-phosphofructokinase 1501063:1502085 reverse MW:35806	Regular	39577030	0	358627035	52	5	23	29.41	304455	267718	281460	0	8	Pass2	InSource	None	2861397	DGI	DGIGGVAVGIR	277	3	3.10	378	0	0	0	0	93451	0.0000		0	0.0		214891	263	496283839156139	592567678312277	0.0093	Green	9981	2861375	2861386	226204	2834	2834.00	1.00	1
1363	NCDO2118_RS07190	ATP-dependent 6-phosphofructokinase 1501063:1502085 reverse MW:35806	Regular	39577030	0	358627035	52	5	23	29.41	304455	267718	281460	0	9	Pass2	InSource	None	4442929	VGIR	DGIGGVAVGIR	284	4	11.05	378	2	2	0	0	1953832	0.0000		734	0.0	y1y4	214891	425	683416700833789	966833401667577	0.0070	Green	9989	4442901	4442915	226234	2127	2127.00	1.00	1
1363	NCDO2118_RS07190	ATP-dependent 6-phosphofructokinase 1501063:1502085 reverse MW:35806	Regular	39577030	0	358627035	52	5	23	29.41	304455	267718	281460	0	10	Pass2	InSource	None	8985469	GIGGVAVGIR	DGIGGVAVGIR	278	10	11.05	378	0	0	0	0	1467694	0.0000		0	0.0		214891	865	109758215932617	697582159326165	0.0070	Green	9974	8985465	8985489	226186	2116	2116.00	2.00	2
1363	NCDO2118_RS07190	ATP-dependent 6-phosphofructokinase 1501063:1502085 reverse MW:35806	Regular	39577030	0	358627035	52	5	23	29.41	304455	267718	281460	0	11	Pass2	InSource	None	5702882	DGIGGVA	DGIGGVAVGIR	277	7	3.10	378	2	2	0	0	2140785	0.0000		162	0.0	b5b7b7	214891	531	792786017064859	118557203412972	0.0059	Green	9969	5702878	5702892	226165	1789	1789.00	1.00	1
1363	NCDO2118_RS07190	ATP-dependent 6-phosphofructokinase 1501063:1502085 reverse MW:35806	Regular	47863240	0	358627035	84	10	23	37.35	399952	360475	231972	1	1	Pass1	PepFrag1	None	20200386	YPEFAQVEGQLAGIEQLK	YPEFAQVEGQLAGIEQLK	72	18	3.96	368	30	30	25	12	734627300	85461	Identified	141904	11.4	b2b3b4b5b6b6*b7b8b8*b9b9b10b10*b10b11b11*b11b12*b13b14b16b18*y1y2y3y4y4*y5y6y7y7y8y9y9y10y10*y11y11*y12y13y14y15y17y18y18*	348678	1877	183965258881789	143965258881789	0.5082	Green	17730	20200427	20200392	340347	203245	203245.00	2.38	2
1363	NCDO2118_RS07190	ATP-dependent 6-phosphofructokinase 1501063:1502085 reverse MW:35806	Regular	47863240	0	358627035	84	10	23	37.35	399952	360475	231972	0	2	Pass1	PepFrag1	None	10135738	DGIGGVAVGIR	DGIGGVAVGIR	277	11	7.00	367	14	14	10	5	146488100	78458		32927	6.7	b2b3b3b4b4b5b5b6b7b7b8b11y1y2y3y4y5y6y7y9	225073	956	117327071037588	773270710375882	0.1996	Green	7175	10135649	10135677	226515	79832	79832.00	2.00	2
1363	NCDO2118_RS07190	ATP-dependent 6-phosphofructokinase 1501063:1502085 reverse MW:35806	Regular	47863240	0	358627035	84	10	23	37.35	399952	360475	231972	0	3	Pass1	PepFrag1	None	7004352	AVELLR	AVELLR	271	6	7.00	372	10	10	7	4	183423100	79435		48516	4.0	b2b3b4b5b6y1y2y3y4y6	194133	677	932149161649599	14642983232992	0.1935	Green	3860	7004329	7004345	190781	77398	77398.00	1.00	1
1363	NCDO2118_RS07190	ATP-dependent 6-phosphofructokinase 1501063:1502085 reverse MW:35806	Regular	47863240	0	358627035	84	10	23	37.35	399952	360475	231972	0	4	Pass1	PepFrag1	None	29044724	NEELVESPILGTAEEGALFSLTTEGGIK	NEELVESPILGTAEEGALFSLTTEGGIK	288	28	3.58	369	3	3	0	0	5335461	64072	Missing	287	2.4	b8*b13b15b16y9y12	419351	2710	235002506696719	116668337797813	0.0045	Green	20968	29044769	29044688	407817	1796	1796.00	3.00	3
1363	NCDO2118_RS07190	ATP-dependent 6-phosphofructokinase 1501063:1502085 reverse MW:35806	Regular	47863240	0	358627035	84	10	23	37.35	399952	360475	231972	0	5	Pass2	PepFrag2	None	11906164	FENVVNNINK	FENVVNNINK	197	10	7.00	370	2	2	0	0	3800762	62599		181	2.0	b2y4y7	192077	1097	128596965077436	885969650774356	0.0079	Green	1992	11906257	11906281	162719	3142	3142.00	2.00	2
1363	NCDO2118_RS07190	ATP-dependent 6-phosphofructokinase 1501063:1502085 reverse MW:35806	Regular	47863240	0	358627035	84	10	23	37.35	399952	360475	231972	0	6	Pass2	PepFrag2	None	21961118	NHHIIVLAEGVMTGEEFATK	NHHIIVLAEGVMTGEEFATK	213	20	5.23	371	3	3	0	0	7201468	65374		836	2.4	b4y9y20	365646	2051	1951656614265	1551656614265	0.0064	Green	19946	21960975	21960919	379104	2557	2557.00	2.00	2
1363	NCDO2118_RS07190	ATP-dependent 6-phosphofructokinase 1501063:1502085 reverse MW:35806	Regular	47863240	0	358627035	84	10	23	37.35	399952	360475	231972	0	7	Pass2	PepFrag2	None	8214516	AGLELYR	AGLELYR	322	7	7.00	376	0	0	0	0	981640	56720		91	1.3	y6	190917	761	100774210720246	161548421440491	0.0033	Green	10826	8214342	8214357	260913	1323	1323.00	1.00	1
1363	NCDO2118_RS07190	ATP-dependent 6-phosphofructokinase 1501063:1502085 reverse MW:35806	Regular	47863240	0	358627035	84	10	23	37.35	399952	360475	231972	0	8	Pass2	VarMod	Oxidation M(7)	10535397	TFVVEVMGR	TFVVEVMGR	162	9	7.00	373	6	6	2	2	25944910	70941		1321	2.4	b2b3b5y3y6y7	242419	972	118632535023639	78632535023639	0.0138	Green	5214	10535376	10535403	206438	5530	5530.00	2.00	2
1363	NCDO2118_RS07190	ATP-dependent 6-phosphofructokinase 1501063:1502085 reverse MW:35806	Regular	47863240	0	358627035	84	10	23	37.35	399952	360475	231972	0	9	Pass2	VarMod	Phosphoryl STY(2)	17148748	VSVLGHIQRGGSPTAR	VSVLGHIQRGGSPTAR	244	16	12.40	375	1	1	0	0	2022198	59858	Identified	700	2.3	b2-H3PO4b7-H3PO4b10y4y6y16	150011	1526	160249244219217	120249244219217	0.0074	Green	9449	17148774	17148767	247929	2946	2946.00	2.00	2
1363	NCDO2118_RS07190	ATP-dependent 6-phosphofructokinase 1501063:1502085 reverse MW:35806	Regular	47863240	0	358627035	84	10	23	37.35	399952	360475	231972	0	10	Pass2	VarMod	Phosphoryl STY(13)	25172571	NHHIIVLAEGVMTGEEFATKLK	NHHIIVLAEGVMTGEEFATKLK	213	22	6.04	374	0	0	0	0	1853847	59481		140	2.0	b6*y11	369636	2310	211268275550397	100845517033598	0.0038	Green	19709	25172526	25172500	375108	1500	1500.00	3.00	3
1363	NCDO2118_RS07190	ATP-dependent 6-phosphofructokinase 1501063:1502085 reverse MW:35806	Regular	47863240	0	358627035	84	10	23	37.35	399952	360475	231972	0	11	Pass2	InSource	None	5153300	AVGIR	DGIGGVAVGIR	283	5	11.05	367	4	4	1	0	11741030	0.0000		3510	0.0	b2b3y1y5	225073	492	75347648430133	110695296860266	0.0276	Green	7142	5153278	5153293	226340	11050	11050.00	1.00	1
1363	NCDO2118_RS07190	ATP-dependent 6-phosphofructokinase 1501063:1502085 reverse MW:35806	Regular	47863240	0	358627035	84	10	23	37.35	399952	360475	231972	0	12	Pass2	InSource	None	6874036	GIEQLK	YPEFAQVEGQLAGIEQLK	84	6	7.00	368	3	3	1	0	12262070	0.0000		535	0.0	b3b4y4*y6	348678	654	910915586100609	142183117220122	0.0063	Green	17737	6874011	6874027	340376	2522	2522.00	1.00	1
1363	NCDO2118_RS07190	ATP-dependent 6-phosphofructokinase 1501063:1502085 reverse MW:35806	Regular	47863240	0	358627035	84	10	23	37.35	399952	360475	231972	0	13	Pass2	InSource	None	6693566	DGIGGVAV	DGIGGVAVGIR	277	8	3.10	367	3	3	2	0	13327330	0.0000		242	0.0	b5b6b6b7b7	225073	636	894123915508906	138824783101781	0.0053	Green	7144	6693580	6693596	226346	2115	2115.00	1.00	1
1363	NCDO2118_RS07190	ATP-dependent 6-phosphofructokinase 1501063:1502085 reverse MW:35806	Regular	47863240	0	358627035	84	10	23	37.35	399952	360475	231972	0	14	Pass2	InSource	None	4442929	VGIR	DGIGGVAVGIR	284	4	11.05	367	2	2	0	0	1728294	0.0000		455	0.0	y1y4	225073	425	683416700833789	966833401667577	0.0040	Green	7162	4442885	4442899	226407	1591	1591.00	1.00	1
1363	NCDO2118_RS07190	ATP-dependent 6-phosphofructokinase 1501063:1502085 reverse MW:35806	Regular	47863240	0	358627035	84	10	23	37.35	399952	360475	231972	0	15	Pass2	InSource	None	4012871	LLR	AVELLR	274	3	11.05	372	1	1	0	0	1480479	0.0000		110	0.0	y3	194133	396	65196321315687	90392642631374	0.0039	Green	3862	4012838	4012852	190810	1567	1567.00	1.00	1
1363	NCDO2118_RS07190	ATP-dependent 6-phosphofructokinase 1501063:1502085 reverse MW:35806	Regular	47863240	0	358627035	84	10	23	37.35	399952	360475	231972	0	16	Pass2	InSource	None	5702882	DGIGGVA	DGIGGVAVGIR	277	7	3.10	367	0	0	0	0	1167748	0.0000		0	0.0		225073	531	792786017064859	118557203412972	0.0026	Green	7138	5702868	5702884	226323	1024	1024.00	1.00	1
1363	NCDO2118_RS07190	ATP-dependent 6-phosphofructokinase 1501063:1502085 reverse MW:35806	Regular	47863240	0	358627035	84	10	23	37.35	399952	360475	231972	0	17	Pass2	InSource	None	8715247	LAGIEQLK	YPEFAQVEGQLAGIEQLK	82	8	7.00	368	2	2	0	0	3396222	0.0000		217	0.0	y6y8	348678	845	108059786919021	176119573838043	0.0020	Green	17729	8715273	8715287	340346	814	814.00	1.00	1
1363	NCDO2118_RS07190	ATP-dependent 6-phosphofructokinase 1501063:1502085 reverse MW:35806	Regular	25915870	0	358627035	72	11	23	55.29	266342	239602	136535	1	1	Pass1	PepFrag1	None	20200386	YPEFAQVEGQLAGIEQLK	YPEFAQVEGQLAGIEQLK	72	18	3.96	1904	24	24	19	9	256030700	78219	Identified	111370	11.5	b3b4b5b6b6*b7b8b9b10b10b11b12*b13b14b15b16b18*y3y4y5y6y7y7*y9y10y11y12y12*y13y13*y14y17*y18	364758	1877	183965258881789	143965258881789	0.7854	Green	28230	20200400	20200384	334622	209198	209198.00	2.42	2
1363	NCDO2118_RS07190	ATP-dependent 6-phosphofructokinase 1501063:1502085 reverse MW:35806	Regular	25915870	0	358627035	72	11	23	55.29	266342	239602	136535	0	2	Pass1	PepFrag1	None	10135738	DGIGGVAVGIR	DGIGGVAVGIR	277	11	7.00	1902	8	8	5	2	144539100	75736		7991	4.2	b2b3b4b6b8y3y5y6y7y8	219779	956	117327071037588	773270710375882	0.0837	Green	4146	10135751	10135775	216137	22288	22288.00	1.92	2
1363	NCDO2118_RS07190	ATP-dependent 6-phosphofructokinase 1501063:1502085 reverse MW:35806	Regular	25915870	0	358627035	72	11	23	55.29	266342	239602	136535	0	3	Pass1	PepFrag1	None	17138952	IAVLTSGGDAPGMNAAIR	IAVLTSGGDAPGMNAAIR	3	18	7.00	1903	9	9	1	0	19426370	67020	Identified	3318	3.5	b3b5b8b12b18y5*y7y8*y9y12y13y15*y18	277386	1604	165664406959219	125664406959219	0.0305	Green	7660	17139022	17139025	242607	8116	8116.00	2.00	2
1363	NCDO2118_RS07190	ATP-dependent 6-phosphofructokinase 1501063:1502085 reverse MW:35806	Regular	25915870	0	358627035	72	11	23	55.29	266342	239602	136535	0	4	Pass1	PepFrag1	None	34386886	AISEGIEVYGINHGYAGMVAGDIFPLTSASVGDK	AISEGIEVYGINHGYAGMVAGDIFPLTSASVGDK	26	34	4.06	1906	9	9	1	1	19729940	67087	Identified	6170	3.8	b6b13b15b15b16b24b24b29*b32*y5y11y11y18y26y34	394469	3183	261607822891141	134405215260761	0.0194	Green	36989	34386861	34386749	373154	5164	5164.00	3.03	3
1363	NCDO2118_RS07190	ATP-dependent 6-phosphofructokinase 1501063:1502085 reverse MW:35806	Regular	25915870	0	358627035	72	11	23	55.29	266342	239602	136535	0	5	Pass1	PepFrag1	None	42181129	LTEHGFPAVGLPGTIDNDIVGTDFTIGFDTAVSTVVDALDK	LTEHGFPAVGLPGTIDNDIVGTDFTIGFDTAVSTVVDALDK	111	41	3.53	1905	5	5	0	0	29209450	68791	Identified	1953	3.6	b11b12b31y12y15y15y41	427679	3930	301084224596082	110542112298041	0.0147	Green	50551	42181332	42181260	510316	3912	3912.00	3.60	4
1363	NCDO2118_RS07190	ATP-dependent 6-phosphofructokinase 1501063:1502085 reverse MW:35806	Regular	25915870	0	358627035	72	11	23	55.29	266342	239602	136535	0	6	Pass1	PepFrag1	Carbamidomethyl C(19)	26733189	NAGDIALNAGIAAGADDICIPEKEFK	NAGDIALNAGIAAGADDICIPEKEFK	171	26	3.86	1909	4	4	0	0	7079020	62635	Missing	1431	2.7	b6b8*b13*y12y14y15y25	377964	2430	218522997895323	178522997895323	0.0104	Green	37034	26733258	26733185	373322	2766	2766.00	2.31	2
1363	NCDO2118_RS07190	ATP-dependent 6-phosphofructokinase 1501063:1502085 reverse MW:35806	Regular	25915870	0	358627035	72	11	23	55.29	266342	239602	136535	0	7	Pass1	PepFrag1	None	11906164	FENVVNNINK	FENVVNNINK	197	10	7.00	1910	4	4	0	0	6174483	62042		1028	1.7	b5b10y1y3y5y7y8*	172354	1097	128596965077436	885969650774356	0.0081	Green	11879	11906162	11906183	266402	2163	2163.00	1.66	2
1363	NCDO2118_RS07190	ATP-dependent 6-phosphofructokinase 1501063:1502085 reverse MW:35806	Regular	25915870	0	358627035	72	11	23	55.29	266342	239602	136535	0	8	Pass1	PepFrag1	None	20209909	FGIEGVVVIGGDGSYHGAMR	FGIEGVVVIGGDGSYHGAMR	91	20	5.22	1907	1	1	0	0	6203341	62062		108	1.5	y8	302568	1857	182656123619213	817707490794755	0.0029	Green	20127	20209892	20209908	301802	767	767.00	3.00	3
1363	NCDO2118_RS07190	ATP-dependent 6-phosphofructokinase 1501063:1502085 reverse MW:35806	Regular	25915870	0	358627035	72	11	23	55.29	266342	239602	136535	0	9	Pass2	PepFrag2	None	10375448	TFVVEVMGR	TFVVEVMGR	162	9	7.00	1908	2	2	0	0	1934515	57001		365	1.9	b6y2y6	240035	972	118632535023639	78632535023639	0.0111	Yellow	17608	10375517	10375540	290976	2954	2954.00	2.00	2
1363	NCDO2118_RS07190	ATP-dependent 6-phosphofructokinase 1501063:1502085 reverse MW:35806	Regular	25915870	0	358627035	72	11	23	55.29	266342	239602	136535	0	10	Pass2	PepFrag2	None	11996379	LNSALNNLNLN	LNSALNNLNLN	329	11	6.13	1911	0	0	0	0	687036	52505		167	1.3	y2*y9*	281191	1116	130077574610854	90077574610854	0.0030	Red	34733	11996229	11996250	361997	791	791.00	2.00	2
1363	NCDO2118_RS07190	ATP-dependent 6-phosphofructokinase 1501063:1502085 reverse MW:35806	Regular	25915870	0	358627035	72	11	23	55.29	266342	239602	136535	0	11	Pass2	MissedCleavage	None	21490859	KFGIEGVVVIGGDGSYHGAMR	KFGIEGVVVIGGDGSYHGAMR	90	21	7.74	1912	1	1	0	0	4158056	60325		37	1.7	y12	457546	1992	19140466729043	876031115269536	0.0036	Green	47726	21490908	21490917	465867	955	955.00	3.00	3
1363	NCDO2118_RS07190	ATP-dependent 6-phosphofructokinase 1501063:1502085 reverse MW:35806	Regular	25915870	0	358627035	72	11	23	55.29	266342	239602	136535	0	12	Pass2	InSource	None	7284414	GGVAVGIR	DGIGGVAVGIR	280	8	11.05	1902	3	3	0	0	2754442	0.0000		2361	0.0	b4b8y8	219779	693	946778652848494	149355730569699	0.0152	Green	4152	7284417	7284438	216206	4054	4054.00	1.00	1
1363	NCDO2118_RS07190	ATP-dependent 6-phosphofructokinase 1501063:1502085 reverse MW:35806	Regular	25915870	0	358627035	72	11	23	55.29	266342	239602	136535	0	13	Pass2	InSource	None	7584407	AGIEQLK	YPEFAQVEGQLAGIEQLK	83	7	7.00	1904	2	2	0	0	4827511	0.0000		236	0.0	b5b7y4*	364758	721	97211238753916	154422477507832	0.0121	Green	28201	7584391	7584412	334541	3214	3214.00	1.00	1
1363	NCDO2118_RS07190	ATP-dependent 6-phosphofructokinase 1501063:1502085 reverse MW:35806	Regular	9292161	0	358627035	40	6	23	30.00	105325	91357	17336	1	1	Pass1	PepFrag1	None	11906164	FENVVNNINK	FENVVNNINK	197	10	7.00	451	5	5	0	0	3616606	55264		2979	6.2	b5b5*b8b8y1y2*y3y9	221738	1097	128596965077436	885969650774356	0.6474	Yellow	2747	11906151	11906164	154798	68192	68192.00	2.00	2
1363	NCDO2118_RS07190	ATP-dependent 6-phosphofructokinase 1501063:1502085 reverse MW:35806	Regular	9292161	0	358627035	40	6	23	30.00	105325	91357	17336	0	2	Pass1	PepFrag1	None	20200386	YPEFAQVEGQLAGIEQLK	YPEFAQVEGQLAGIEQLK	72	18	3.96	448	15	15	8	5	121826700	70539	Missing	6293	4.2	b5b6b7b8b10b11y4y6y7y8y10y11y12y14y18y18*	330801	1877	183965258881789	826435059211928	0.1272	Green	7404	20200366	20200369	341332	13394	13394.00	2.49	3
1363	NCDO2118_RS07190	ATP-dependent 6-phosphofructokinase 1501063:1502085 reverse MW:35806	Regular	9292161	0	358627035	40	6	23	30.00	105325	91357	17336	0	3	Pass1	PepFrag1	None	10135738	DGIGGVAVGIR	DGIGGVAVGIR	277	11	7.00	447	6	6	4	1	37315550	65400		2922	3.1	b3y4y5y6y7y8	194051	956	117327071037588	773270710375882	0.0928	Green	5202	10135745	10135763	228989	9771	9771.00	2.00	2
1363	NCDO2118_RS07190	ATP-dependent 6-phosphofructokinase 1501063:1502085 reverse MW:35806	Regular	9292161	0	358627035	40	6	23	30.00	105325	91357	17336	0	4	Pass1	PepFrag1	None	42181129	LTEHGFPAVGLPGTIDNDIVGTDFTIGFDTAVSTVVDALDK	LTEHGFPAVGLPGTIDNDIVGTDFTIGFDTAVSTVVDALDK	111	41	3.53	449	10	10	5	0	12252500	60563	Missing	3692	5.0	b8b9b15b19b20*b31*y5y6y7y9y10y11y41	432788	3930	301084224596082	110542112298041	0.0895	Green	10241	42181345	42181345	510100	9431	9431.00	3.66	4
1363	NCDO2118_RS07190	ATP-dependent 6-phosphofructokinase 1501063:1502085 reverse MW:35806	Regular	9292161	0	358627035	40	6	23	30.00	105325	91357	17336	0	5	Pass2	PepFrag2	None	17138952	IAVLTSGGDAPGMNAAIR	IAVLTSGGDAPGMNAAIR	3	18	7.00	450	1	1	0	0	970236	49550	Missing	67	1.5	b12y10	283561	1604	165664406959219	125664406959219	0.0081	Red	8987	17139135	17139125	412904	854	854.00	2.00	2
1363	NCDO2118_RS07190	ATP-dependent 6-phosphofructokinase 1501063:1502085 reverse MW:35806	Regular	9292161	0	358627035	40	6	23	30.00	105325	91357	17336	0	6	Pass2	MissedCleavage	None	24372908	NHHIIVLAEGVMTGEEFATKLK	NHHIIVLAEGVMTGEEFATKLK	213	22	6.04	452	2	2	0	0	2555938	53757		526	2.4	b11y7y10y22	385923	2310	211268275550397	100845517033598	0.0232	Yellow	7576	24372773	24372758	350218	2446	2446.00	2.73	3
1363	NCDO2118_RS07190	ATP-dependent 6-phosphofructokinase 1501063:1502085 reverse MW:35806	Regular	9292161	0	358627035	40	6	23	30.00	105325	91357	17336	0	7	Pass2	InSource	None	7284414	GGVAVGIR	DGIGGVAVGIR	280	8	11.05	447	1	1	0	0	1666092	0.0000		857	0.0	y8	194051	693	946778652848494	149355730569699	0.0117	Green	5200	7284368	7284388	228929	1237	1237.00	1.00	1
1363	NCDO2118_RS07190	ATP-dependent 6-phosphofructokinase 1501063:1502085 reverse MW:35806	Regular	11805370	0	358627035	23	4	23	25.00	65208	38539.5	14493	1	1	Pass1	PepFrag1	None	10135738	DGIGGVAVGIR	DGIGGVAVGIR	277	11	7.00	323	11	11	6	2	270257400	75039		7351	3.9	b3b5b11y3y4y5y6y7y8y9y11	215497	956	117327071037588	773270710375882	0.2638	Green	3157	10135686	10135715	226452	17199	17199.00	1.96	2
1363	NCDO2118_RS07190	ATP-dependent 6-phosphofructokinase 1501063:1502085 reverse MW:35806	Regular	11805370	0	358627035	23	4	23	25.00	65208	38539.5	14493	0	2	Pass1	PepFrag1	None	20200386	YPEFAQVEGQLAGIEQLK	YPEFAQVEGQLAGIEQLK	72	18	3.96	324	10	10	5	2	54485800	68084	Missing	3955	3.6	b5b6b7b8b10y6y7y10y11y18y18*	330865	1877	183965258881789	826435059211928	0.1303	Green	7350	20200307	20200332	339933	8494	8494.00	2.58	3
1363	NCDO2118_RS07190	ATP-dependent 6-phosphofructokinase 1501063:1502085 reverse MW:35806	Regular	11805370	0	358627035	23	4	23	25.00	65208	38539.5	14493	0	3	Pass2	PepFrag2	None	34386886	AISEGIEVYGINHGYAGMVAGDIFPLTSASVGDK	AISEGIEVYGINHGYAGMVAGDIFPLTSASVGDK	26	34	4.06	326	0	0	0	0	1772064	53206	Missing	51	1.9	b12	366227	3183	261607822891141	134405215260761	0.0124	Yellow	8115	34386437	34386306	375276	809	809.00	3.00	3
1363	NCDO2118_RS07190	ATP-dependent 6-phosphofructokinase 1501063:1502085 reverse MW:35806	Regular	11805370	0	358627035	23	4	23	25.00	65208	38539.5	14493	0	4	Pass2	VarMod	Phosphoryl STY(13)	25172571	NHHIIVLAEGVMTGEEFATKLK	NHHIIVLAEGVMTGEEFATKLK	213	22	6.04	325	1	1	0	0	1342772	52001		1609	6.5	b12*b13*y15-H3PO4y16-H3PO4y22y22*	428701	2310	211268275550397	100845517033598	0.5553	Yellow	7753	25172503	25172490	358025	36207	36207.00	2.90	3
1363	NCDO2118_RS07190	ATP-dependent 6-phosphofructokinase 1501063:1502085 reverse MW:35806	Regular	11805370	0	358627035	23	4	23	25.00	65208	38539.5	14493	0	5	Pass2	InSource	None	7284414	GGVAVGIR	DGIGGVAVGIR	280	8	11.05	323	1	1	0	0	3175035	0.0000		1527	0.0	y8	215497	693	946778652848494	149355730569699	0.0383	Green	3156	7284409	7284425	226439	2499	2499.00	1.00	1
1363	NCDO2118_RS07190	ATP-dependent 6-phosphofructokinase 1501063:1502085 reverse MW:35806	Regular	1358501	0	358627035	25	7	23	16.47	41891	14970	10765	1	1	Pass1	PepFrag1	None	10135738	DGIGGVAVGIR	DGIGGVAVGIR	277	11	7.00	325	7	7	5	1	19827280	54303		2609	2.9	b3y3y4y5y6y7y8	226045	956	117327071037588	773270710375882	0.1962	Yellow	2592	10135676	10135704	226045	8218	8218.00	2.00	2
1363	NCDO2118_RS07190	ATP-dependent 6-phosphofructokinase 1501063:1502085 reverse MW:35806	Regular	1358501	0	358627035	25	7	23	16.47	41891	14970	10765	0	2	Pass1	PepFrag1	None	20200386	YPEFAQVEGQLAGIEQLK	YPEFAQVEGQLAGIEQLK	72	18	3.96	326	8	8	4	1	11304400	51863	Missing	2482	3.1	b6b7b9b10y6y7y8y18	340075	1877	183965258881789	826435059211928	0.1375	Yellow	5947	20200365	20200365	340075	5762	5762.00	2.55	3
1363	NCDO2118_RS07190	ATP-dependent 6-phosphofructokinase 1501063:1502085 reverse MW:35806	Regular	1358501	0	358627035	25	7	23	16.47	41891	14970	10765	0	3	Pass1	PepFrag1	None	7004352	AVELLR	AVELLR	271	6	7.00	327	2	2	0	0	4303593	47669		673	1.1	b3y6	191056	677	932149161649599	14642983232992	0.0236	Yellow	1685	7004342	7004353	191056	990	990.00	1.00	1
1363	NCDO2118_RS07190	ATP-dependent 6-phosphofructokinase 1501063:1502085 reverse MW:35806	Regular	1358501	0	358627035	25	7	23	16.47	41891	14970	10765	0	4	Pass2	PepFrag2	None	11725767	IRDTSSSHNR	IRDTSSSHNR	152	10	10.89	331	0	0	0	0	488336	38218		34	1.7	b8	235183	1037	123864105813485	838641058134854	0.0504	Red	2931	11725925	11725948	235183	2112	2112.00	2.00	2
1363	NCDO2118_RS07190	ATP-dependent 6-phosphofructokinase 1501063:1502085 reverse MW:35806	Regular	1358501	0	358627035	25	7	23	16.47	41891	14970	10765	0	5	Pass2	PepFrag2	Carbamidomethyl C(19)	26733189	NAGDIALNAGIAAGADDICIPEKEFK	NAGDIALNAGIAAGADDICIPEKEFK	171	26	3.86	330	1	1	0	0	369462	37006	Missing	133	2.2	b10*y1	256861	2430	218522997895323	105681998596882	0.0378	Red	3856	26733716	26733716	256861	1582	1582.00	3.00	3
1363	NCDO2118_RS07190	ATP-dependent 6-phosphofructokinase 1501063:1502085 reverse MW:35806	Regular	1358501	0	358627035	25	7	23	16.47	41891	14970	10765	0	6	Pass2	MissedCleavage	None	29725152	GGTFLYSARYPEFAQVEGQLAGIEQLK	GGTFLYSARYPEFAQVEGQLAGIEQLK	63	27	4.56	328	2	2	0	0	381396	37144	Missing	2948	5.3	b8b27y27	309150	2754	237539365170201	787696825851004	0.3969	Red	5202	29725068	29725068	309150	16627	16627.00	3.82	4
1363	NCDO2118_RS07190	ATP-dependent 6-phosphofructokinase 1501063:1502085 reverse MW:35806	Regular	1358501	0	358627035	25	7	23	16.47	41891	14970	10765	0	7	Pass2	VarMod	Oxidation M(20)	21650808	KFGIEGVVVIGGDGSYHGAMR	KFGIEGVVVIGGDGSYHGAMR	90	21	7.74	329	3	3	0	0	4010247	47362		1079	3.2	b7y13y15y21	339121	1992	19140466729043	15140466729043	0.1252	Yellow	5931	21650789	21650733	339121	5243	5243.00	2.17	2
1363	NCDO2118_RS07190	ATP-dependent 6-phosphofructokinase 1501063:1502085 reverse MW:35806	Regular	1358501	0	358627035	25	7	23	16.47	41891	14970	10765	0	8	Pass2	InSource	None	7284414	GGVAVGIR	DGIGGVAVGIR	280	8	11.05	325	2	2	0	0	1145906	0.0000		807	0.0	b4y8	226124	693	946778652848494	149355730569699	0.0324	Yellow	2597	7284357	7284367	226124	1357	1357.00	1.00	1
1363	NCDO2118_RS07190	ATP-dependent 6-phosphofructokinase 1501063:1502085 reverse MW:35806	Regular	35742700	0	358627035	65	8	23	20.29	521549	398584	402300	1	1	Pass1	PepFrag1	None	10135738	DGIGGVAVGIR	DGIGGVAVGIR	277	11	7.00	546	21	21	19	9	958104600	85346		305280	10.4	b2b3b3b4b4b5b5b6b6b7b8b9b10b10b11y1y2y3y4y5y6y7y8y9y10y11	213780	956	117327071037588	194654142075176	0.5074	Green	10316	10135731	10135746	225140	264654	264654.00	1.46	1
1363	NCDO2118_RS07190	ATP-dependent 6-phosphofructokinase 1501063:1502085 reverse MW:35806	Regular	35742700	0	358627035	65	8	23	20.29	521549	398584	402300	0	2	Pass1	PepFrag1	None	7004352	AVELLR	AVELLR	271	6	7.00	549	8	8	5	3	173882400	77934		53401	4.0	b2b3b4b5y2y3y4y6	191151	677	932149161649599	14642983232992	0.1517	Green	5930	7004337	7004355	189698	79145	79145.00	1.00	1
1363	NCDO2118_RS07190	ATP-dependent 6-phosphofructokinase 1501063:1502085 reverse MW:35806	Regular	35742700	0	358627035	65	8	23	20.29	521549	398584	402300	0	3	Pass1	PepFrag1	None	9714945	GGTFLYSAR	GGTFLYSAR	63	9	9.84	547	1	1	0	0	2576104	59642		525	1.8	b4y9	209948	877	110770988111791	707709881117911	0.0049	Green	8827	9714848	9714880	213650	2551	2551.00	1.71	2
1363	NCDO2118_RS07190	ATP-dependent 6-phosphofructokinase 1501063:1502085 reverse MW:35806	Regular	35742700	0	358627035	65	8	23	20.29	521549	398584	402300	0	4	Pass2	PepFrag2	None	11906164	FENVVNNINK	FENVVNNINK	197	10	7.00	548	8	8	5	0	53258780	72796		17986	5.7	b8b8*y1y2*y5y6y7y8y8*y9y9y10y10*	166844	1097	128596965077436	885969650774356	0.1050	Green	3685	11906263	11906294	169613	54785	54785.00	1.99	2
1363	NCDO2118_RS07190	ATP-dependent 6-phosphofructokinase 1501063:1502085 reverse MW:35806	Regular	35742700	0	358627035	65	8	23	20.29	521549	398584	402300	0	5	Pass2	PepFrag2	None	8214516	AGLELYR	AGLELYR	322	7	7.00	551	2	2	0	0	724060	54130		240	4.1	b5b5y7	196753	761	100774210720246	161548421440491	0.0621	Yellow	14027	8214406	8214424	260941	32390	32390.00	1.00	1
1363	NCDO2118_RS07190	ATP-dependent 6-phosphofructokinase 1501063:1502085 reverse MW:35806	Regular	35742700	0	358627035	65	8	23	20.29	521549	398584	402300	0	6	Pass2	PepFrag2	None	10375448	TFVVEVMGR	TFVVEVMGR	162	9	7.00	553	0	0	0	0	386659	51405		32	2.6	y7	234658	972	118632535023639	78632535023639	0.0137	Yellow	18613	10375590	10375623	332388	7157	7157.00	1.84	2
1363	NCDO2118_RS07190	ATP-dependent 6-phosphofructokinase 1501063:1502085 reverse MW:35806	Regular	35742700	0	358627035	65	8	23	20.29	521549	398584	402300	0	7	Pass2	PepFrag2	None	11996379	LNSALNNLNLN	LNSALNNLNLN	329	11	6.13	552	0	0	0	0	522776	52715		74	2.0	b8	236070	1116	130077574610854	90077574610854	0.0052	Yellow	4346	11996554	11996584	176480	2694	2694.00	2.00	2
1363	NCDO2118_RS07190	ATP-dependent 6-phosphofructokinase 1501063:1502085 reverse MW:35806	Regular	35742700	0	358627035	65	8	23	20.29	521549	398584	402300	0	8	Pass2	VarMod	Phosphoryl STY(12)	15907788	VNNPHKAGLELYR	VNNPHKAGLELYR	316	13	9.72	550	2	2	0	0	1788627	58057	Missing	78	2.2	b10y6	166232	1401	151374152400878	111374152400878	0.0060	Green	17575	15907856	15907874	308424	3104	3104.00	2.00	2
1363	NCDO2118_RS07190	ATP-dependent 6-phosphofructokinase 1501063:1502085 reverse MW:35806	Regular	35742700	0	358627035	65	8	23	20.29	521549	398584	402300	0	9	Pass2	InSource	None	6714199	GVAVGIR	DGIGGVAVGIR	281	7	11.05	546	10	10	5	3	91797040	0.0000		14898	0.0	b2b3b4b5b7y1y3y4y5y7	213780	645	902539276707172	140507855341434	0.0577	Green	10309	6714184	6714203	225132	30103	30103.00	1.00	1
1363	NCDO2118_RS07190	ATP-dependent 6-phosphofructokinase 1501063:1502085 reverse MW:35806	Regular	35742700	0	358627035	65	8	23	20.29	521549	398584	402300	0	10	Pass2	InSource	None	5153300	AVGIR	DGIGGVAVGIR	283	5	11.05	546	6	6	2	2	56079880	0.0000		8679	0.0	b2b3b4y1y3y5	213780	492	75347648430133	110695296860266	0.0518	Green	10304	5153277	5153295	225124	27007	27007.00	1.00	1
1363	NCDO2118_RS07190	ATP-dependent 6-phosphofructokinase 1501063:1502085 reverse MW:35806	Regular	35742700	0	358627035	65	8	23	20.29	521549	398584	402300	0	11	Pass2	InSource	None	2861397	DGI	DGIGGVAVGIR	277	3	3.10	546	1	1	0	0	54497	0.0000		42	0.0	b2	213780	263	496283839156139	592567678312277	0.0073	Green	10314	2861377	2861389	225139	3812	3812.00	1.00	1
1363	NCDO2118_RS07190	ATP-dependent 6-phosphofructokinase 1501063:1502085 reverse MW:35806	Regular	35742700	0	358627035	65	8	23	20.29	521549	398584	402300	0	12	Pass2	InSource	None	4992511	DGIGGV	DGIGGVAVGIR	277	6	3.10	546	1	1	0	0	2936883	0.0000		30	0.0	b5	213780	464	724611053362086	104922210672417	0.0065	Green	10317	4992485	4992502	225150	3384	3384.00	1.00	1
1363	NCDO2118_RS07190	ATP-dependent 6-phosphofructokinase 1501063:1502085 reverse MW:35806	Regular	35742700	0	358627035	65	8	23	20.29	521549	398584	402300	0	13	Pass2	InSource	None	4442929	VGIR	DGIGGVAVGIR	284	4	11.05	546	2	2	0	0	1435662	0.0000		886	0.0	y1y4	213780	425	683416700833789	966833401667577	0.0055	Green	10301	4442900	4442916	225112	2887	2887.00	1.00	1
1363	NCDO2118_RS07190	ATP-dependent 6-phosphofructokinase 1501063:1502085 reverse MW:35806	Regular	35742700	0	358627035	65	8	23	20.29	521549	398584	402300	0	14	Pass2	InSource	None	3431612	DGIG	DGIGGVAVGIR	277	4	3.10	546	0	0	0	0	251277	0.0000		0	0.0		213780	311	554966234272045	709932468544091	0.0055	Green	10318	3431592	3431606	225152	2846	2846.00	1.00	1
1363	NCDO2118_RS07190	ATP-dependent 6-phosphofructokinase 1501063:1502085 reverse MW:35806	Regular	35742700	0	358627035	65	8	23	20.29	521549	398584	402300	0	15	Pass2	InSource	None	8985469	GIGGVAVGIR	DGIGGVAVGIR	278	10	11.05	546	3	3	0	0	1817083	0.0000		116	0.0	b4y2y4	213780	865	109758215932617	697582159326165	0.0054	Green	10303	8985432	8985465	225114	2816	2816.00	2.00	2
1363	NCDO2118_RS07190	ATP-dependent 6-phosphofructokinase 1501063:1502085 reverse MW:35806	Regular	35742700	0	358627035	65	8	23	20.29	521549	398584	402300	0	16	Pass2	InSource	None	5702882	DGIGGVA	DGIGGVAVGIR	277	7	3.10	546	0	0	0	0	3506645	0.0000		33	0.0	b6	213780	531	792786017064859	118557203412972	0.0042	Green	10322	5702867	5702885	225159	2214	2214.00	1.00	1
1363	NCDO2118_RS07190	ATP-dependent 6-phosphofructokinase 1501063:1502085 reverse MW:35806	Regular	99459000	0	358627035	97	12	23	40.88	579704	492388	462974	1	1	Pass1	PepFrag1	None	20200386	YPEFAQVEGQLAGIEQLK	YPEFAQVEGQLAGIEQLK	72	18	3.96	128	32	32	28	14	1343757000	91260	Identified	211233	12.4	b2b3b4b5b6b6*b7b7*b7b8b8*b9b9b10b10b11b11*b11b12b12*b13b13*b14b14*b15b17y1y2y3y3*y4y4y5y6y6*y7y7*y8y9y9*y9y10y10*y11y11*y12y13y14y14*y15y17y18y18*	338531	1877	183965258881789	143965258881789	0.4465	Green	18234	20200407	20200393	339422	258833	258833.00	2.28	2
1363	NCDO2118_RS07190	ATP-dependent 6-phosphofructokinase 1501063:1502085 reverse MW:35806	Regular	99459000	0	358627035	97	12	23	40.88	579704	492388	462974	0	2	Pass1	PepFrag1	None	10135738	DGIGGVAVGIR	DGIGGVAVGIR	277	11	7.00	127	17	17	13	5	785496400	88928		158304	8.0	b2b3b3b4b4b5b5b6b7b7b11b11y1y2y3y4y5y6y7y8y9y10y11	218169	956	117327071037588	194654142075176	0.2194	Green	6892	10135750	10135762	226138	127174	127174.00	1.57	1
1363	NCDO2118_RS07190	ATP-dependent 6-phosphofructokinase 1501063:1502085 reverse MW:35806	Regular	99459000	0	358627035	97	12	23	40.88	579704	492388	462974	0	3	Pass1	PepFrag1	None	7004352	AVELLR	AVELLR	271	6	7.00	132	9	9	6	4	143492200	81545		72683	4.0	b2b3b4b5y1y2y3y4y6	188097	677	932149161649599	14642983232992	0.1835	Green	3369	7004344	7004362	190185	106381	106381.00	1.00	1
1363	NCDO2118_RS07190	ATP-dependent 6-phosphofructokinase 1501063:1502085 reverse MW:35806	Regular	99459000	0	358627035	97	12	23	40.88	579704	492388	462974	0	4	Pass1	PepFrag1	None	11906164	FENVVNNINK	FENVVNNINK	197	10	7.00	126	3	3	1	0	8010930	69013		159	1.6	b2b3y6	184698	1097	128596965077436	885969650774356	0.0029	Green	2788	11906174	11906199	183385	1697	1697.00	2.00	2
1363	NCDO2118_RS07190	ATP-dependent 6-phosphofructokinase 1501063:1502085 reverse MW:35806	Regular	99459000	0	358627035	97	12	23	40.88	579704	492388	462974	0	5	Pass1	PepFrag1	Carbamidomethyl C(19)	22691129	NAGDIALNAGIAAGADDICIPEK	NAGDIALNAGIAAGADDICIPEK	171	23	3.50	131	0	0	0	0	1106993	60418	Missing	279	1.7	b12y10	333285	2051	1951656614265	901104409510003	0.0015	Green	11887	22691189	22691201	271532	886	886.00	3.00	3
1363	NCDO2118_RS07190	ATP-dependent 6-phosphofructokinase 1501063:1502085 reverse MW:35806	Regular	99459000	0	358627035	97	12	23	40.88	579704	492388	462974	0	6	Pass2	PepFrag2	None	10375448	TFVVEVMGR	TFVVEVMGR	162	9	7.00	130	0	0	0	0	581995	57626		347	2.0	b7y8	234626	972	118632535023639	78632535023639	0.0063	Green	2241	10375517	10375545	175865	3644	3644.00	2.00	2
1363	NCDO2118_RS07190	ATP-dependent 6-phosphofructokinase 1501063:1502085 reverse MW:35806	Regular	99459000	0	358627035	97	12	23	40.88	579704	492388	462974	0	7	Pass2	PepFrag2	None	20209909	FGIEGVVVIGGDGSYHGAMR	FGIEGVVVIGGDGSYHGAMR	91	20	5.22	129	0	0	0	0	810478	59064		34	1.8	b18	291629	1857	182656123619213	142656123619213	0.0019	Green	10055	20210076	20210061	253251	1089	1089.00	2.00	2
1363	NCDO2118_RS07190	ATP-dependent 6-phosphofructokinase 1501063:1502085 reverse MW:35806	Regular	99459000	0	358627035	97	12	23	40.88	579704	492388	462974	0	8	Pass2	MissedCleavage	None	23812282	GKNHHIIVLAEGVMTGEEFATK	GKNHHIIVLAEGVMTGEEFATK	211	22	6.04	133	2	2	0	0	1936152	62846		309	1.9	b19*y11y19	300354	2234	206608608795017	166608608795017	0.0021	Green	20201	23812138	23812092	373830	1241	1241.00	2.59	2
1363	NCDO2118_RS07190	ATP-dependent 6-phosphofructokinase 1501063:1502085 reverse MW:35806	Regular	99459000	0	358627035	97	12	23	40.88	579704	492388	462974	0	9	Pass2	VarMod	Oxidation M(14);Phosphoryl STY(6);Phosphoryl STY(7)	20459238	RIAVLTSGGDAPGMNAAIR	RIAVLTSGGDAPGMNAAIR	2	19	10.89	136	2	2	0	0	1139734	60544	Missing	2044	3.9	b7-H3PO4b9b15-H3PO4b16y15-2(H3PO4)y19y19*	249215	1752	175704291367449	135704291367449	0.0180	Green	13494	20459115	20459098	287540	10421	10421.00	2.06	2
1363	NCDO2118_RS07190	ATP-dependent 6-phosphofructokinase 1501063:1502085 reverse MW:35806	Regular	99459000	0	358627035	97	12	23	40.88	579704	492388	462974	0	10	Pass2	VarMod	Oxidation M(19)	20369858	FGIEGVVVIGGDGSYHGAMR	FGIEGVVVIGGDGSYHGAMR	91	20	5.22	134	1	1	0	0	2513602	63979		437	4.0	b4b20y12y19	291629	1857	182656123619213	142656123619213	0.0175	Green	13254	20369832	20369817	284954	10154	10154.00	2.18	2
1363	NCDO2118_RS07190	ATP-dependent 6-phosphofructokinase 1501063:1502085 reverse MW:35806	Regular	99459000	0	358627035	97	12	23	40.88	579704	492388	462974	0	11	Pass2	VarMod	Oxidation M(20)	21650808	KFGIEGVVVIGGDGSYHGAMR	KFGIEGVVVIGGDGSYHGAMR	90	21	7.74	137	2	2	1	0	1243539	60923		118	2.5	b5b6b20	297057	1992	19140466729043	15140466729043	0.0047	Green	17490	21650782	21650756	330076	2729	2729.00	2.00	2
1363	NCDO2118_RS07190	ATP-dependent 6-phosphofructokinase 1501063:1502085 reverse MW:35806	Regular	99459000	0	358627035	97	12	23	40.88	579704	492388	462974	0	12	Pass2	VarMod	Oxidation M(7)	10535397	TFVVEVMGR	TFVVEVMGR	162	9	7.00	135	5	5	2	2	14928610	71717		857	1.8	b2b3b8y6y7	234626	972	118632535023639	78632535023639	0.0046	Green	4770	10535346	10535373	205913	2639	2639.00	2.00	2
1363	NCDO2118_RS07190	ATP-dependent 6-phosphofructokinase 1501063:1502085 reverse MW:35806	Regular	99459000	0	358627035	97	12	23	40.88	579704	492388	462974	0	13	Pass2	InSource	None	6714199	GVAVGIR	DGIGGVAVGIR	281	7	11.05	127	4	4	2	0	10502340	0.0000		7915	0.0	b3b4b5y7	218169	645	902539276707172	140507855341434	0.0271	Green	6885	6714182	6714200	226117	15722	15722.00	1.00	1
1363	NCDO2118_RS07190	ATP-dependent 6-phosphofructokinase 1501063:1502085 reverse MW:35806	Regular	99459000	0	358627035	97	12	23	40.88	579704	492388	462974	0	14	Pass2	InSource	None	5153300	AVGIR	DGIGGVAVGIR	283	5	11.05	127	4	4	0	1	91301260	0.0000		4295	0.0	b2b4y3y5	218169	492	75347648430133	110695296860266	0.0244	Green	6878	5153272	5153290	226069	14149	14149.00	1.00	1
1363	NCDO2118_RS07190	ATP-dependent 6-phosphofructokinase 1501063:1502085 reverse MW:35806	Regular	99459000	0	358627035	97	12	23	40.88	579704	492388	462974	0	15	Pass2	InSource	None	6874036	GIEQLK	YPEFAQVEGQLAGIEQLK	84	6	7.00	128	6	6	2	2	27861660	0.0000		840	0.0	b2b4b5y1y2y3*y6	338531	654	910915586100609	142183117220122	0.0067	Green	18247	6874037	6874055	339509	3903	3903.00	1.00	1
1363	NCDO2118_RS07190	ATP-dependent 6-phosphofructokinase 1501063:1502085 reverse MW:35806	Regular	99459000	0	358627035	97	12	23	40.88	579704	492388	462974	0	16	Pass2	InSource	None	7584407	AGIEQLK	YPEFAQVEGQLAGIEQLK	83	7	7.00	128	5	5	2	1	12787100	0.0000		1027	0.0	b4b5b6y3y7	338531	721	97211238753916	154422477507832	0.0060	Green	18241	7584410	7584428	339477	3474	3474.00	1.00	1
1363	NCDO2118_RS07190	ATP-dependent 6-phosphofructokinase 1501063:1502085 reverse MW:35806	Regular	99459000	0	358627035	97	12	23	40.88	579704	492388	462974	0	17	Pass2	InSource	None	12626052	YPEFAQVEGQL	YPEFAQVEGQLAGIEQLK	72	11	3.13	128	0	0	0	0	11436850	0.0000	Identified	108	0.0	b6y10	338531	1156	133167482703312	931674827033122	0.0047	Green	18217	12626048	12626072	339332	2737	2737.00	2.00	2
1363	NCDO2118_RS07190	ATP-dependent 6-phosphofructokinase 1501063:1502085 reverse MW:35806	Regular	99459000	0	358627035	97	12	23	40.88	579704	492388	462974	0	18	Pass2	InSource	None	2861397	DGI	DGIGGVAVGIR	277	3	3.10	127	0	0	0	0	99414	0.0000		0	0.0		218169	263	496283839156139	592567678312277	0.0045	Green	6889	2861378	2861392	226131	2584	2584.00	1.00	1
1363	NCDO2118_RS07190	ATP-dependent 6-phosphofructokinase 1501063:1502085 reverse MW:35806	Regular	99459000	0	358627035	97	12	23	40.88	579704	492388	462974	0	19	Pass2	InSource	None	4012871	LLR	AVELLR	274	3	11.05	132	1	1	0	0	3146256	0.0000		210	0.0	y3	188097	396	65196321315687	90392642631374	0.0036	Green	3383	4012856	4012873	190239	2105	2105.00	1.00	1
1363	NCDO2118_RS07190	ATP-dependent 6-phosphofructokinase 1501063:1502085 reverse MW:35806	Regular	99459000	0	358627035	97	12	23	40.88	579704	492388	462974	0	20	Pass2	InSource	None	4442929	VGIR	DGIGGVAVGIR	284	4	11.05	127	1	1	0	0	1482024	0.0000		675	0.0	y4	218169	425	683416700833789	966833401667577	0.0033	Green	6903	4442891	4442908	226220	1931	1931.00	1.00	1
1363	NCDO2118_RS07190	ATP-dependent 6-phosphofructokinase 1501063:1502085 reverse MW:35806	Regular	99459000	0	358627035	97	12	23	40.88	579704	492388	462974	0	21	Pass2	InSource	None	11495211	YPEFAQVEGQ	YPEFAQVEGQLAGIEQLK	72	10	3.13	128	2	2	0	0	2694254	0.0000	Missing	389	0.0	b7b10	338531	1032	12346563632802	20693127265604	0.0033	Green	18219	11495208	11495213	339351	1892	1892.00	1.39	1
1363	NCDO2118_RS07190	ATP-dependent 6-phosphofructokinase 1501063:1502085 reverse MW:35806	Regular	99459000	0	358627035	97	12	23	40.88	579704	492388	462974	0	22	Pass2	InSource	None	5702882	DGIGGVA	DGIGGVAVGIR	277	7	3.10	127	0	0	0	0	655809	0.0000		0	0.0		218169	531	792786017064859	118557203412972	0.0021	Green	6872	5702880	5702899	226009	1223	1223.00	1.00	1
1363	NCDO2118_RS07190	ATP-dependent 6-phosphofructokinase 1501063:1502085 reverse MW:35806	Regular	99459000	0	358627035	97	12	23	40.88	579704	492388	462974	0	23	Pass2	InSource	None	8715247	LAGIEQLK	YPEFAQVEGQLAGIEQLK	82	8	7.00	128	1	1	0	0	2574960	0.0000		376	0.0	y8	338531	845	108059786919021	176119573838043	0.0017	Green	18229	8715251	8715267	339404	984	984.00	1.00	1
1363	NCDO2118_RS07190	ATP-dependent 6-phosphofructokinase 1501063:1502085 reverse MW:35806	Regular	99459000	0	358627035	97	12	23	40.88	579704	492388	462974	0	24	Pass2	NeutralLoss_H2O	None	9955633	DGIGGVAVGIR	DGIGGVAVGIR	277	11	7.00	127	0	0	0	0	1152170	0.0000		335	0.0	b7b8b11	218169	956	117327071037588	773270710375882	0.0036	Green	6881	9955543	9955570	226102	2112	2112.00	2.00	2
1363	NCDO2118_RS07190	ATP-dependent 6-phosphofructokinase 1501063:1502085 reverse MW:35806	Regular	24520410	0	358627035	91	10	23	56.76	410581	361790	174551	1	1	Pass1	PepFrag1	None	20200386	YPEFAQVEGQLAGIEQLK	YPEFAQVEGQLAGIEQLK	72	18	3.96	2419	24	24	18	6	272385400	78247	Identified	131042	11.9	b2b3b4b5b6b7b7*b8b9b9*b10b10*b11*b13*b13b18y2y3y3*y4y5y6y7y8y10y10*y11y12y13y14y15y17y18	362101	1877	183965258881789	143965258881789	0.5621	Green	31275	20200398	20200390	332143	230784	230784.00	2.39	2
1363	NCDO2118_RS07190	ATP-dependent 6-phosphofructokinase 1501063:1502085 reverse MW:35806	Regular	24520410	0	358627035	91	10	23	56.76	410581	361790	174551	0	2	Pass1	PepFrag1	None	10375448	TFVVEVMGR	TFVVEVMGR	162	9	7.00	2422	5	5	2	1	31237950	68842		10973	6.9	b3b6y5y6y6y7y9	234668	972	118632535023639	78632535023639	0.2539	Green	10913	10375367	10375397	251287	104232	104232.00	1.90	2
1363	NCDO2118_RS07190	ATP-dependent 6-phosphofructokinase 1501063:1502085 reverse MW:35806	Regular	24520410	0	358627035	91	10	23	56.76	410581	361790	174551	0	3	Pass1	PepFrag1	None	34386886	AISEGIEVYGINHGYAGMVAGDIFPLTSASVGDK	AISEGIEVYGINHGYAGMVAGDIFPLTSASVGDK	26	34	4.06	2420	12	12	3	2	13166660	65090	Identified	9672	5.0	b6b6b12b15b19b23b24b25b26y3y10y11y19y26y33y34	402735	3183	261607822891141	134405215260761	0.0284	Green	39620	34387192	34387040	368901	11654	11654.00	3.00	3
1363	NCDO2118_RS07190	ATP-dependent 6-phosphofructokinase 1501063:1502085 reverse MW:35806	Regular	24520410	0	358627035	91	10	23	56.76	410581	361790	174551	0	4	Pass1	PepFrag1	None	17138952	IAVLTSGGDAPGMNAAIR	IAVLTSGGDAPGMNAAIR	3	18	7.00	2417	13	13	6	3	54348960	71247	Identified	3578	3.7	b3b4b5b5b10b18y5y6y8y11y12y13y14y15y18	273363	1604	165664406959219	125664406959219	0.0230	Green	8929	17138953	17138963	240509	9432	9432.00	2.00	2
1363	NCDO2118_RS07190	ATP-dependent 6-phosphofructokinase 1501063:1502085 reverse MW:35806	Regular	24520410	0	358627035	91	10	23	56.76	410581	361790	174551	0	5	Pass1	PepFrag1	None	20209909	FGIEGVVVIGGDGSYHGAMR	FGIEGVVVIGGDGSYHGAMR	91	20	5.22	2418	5	5	2	1	16359370	66033		760	3.3	b5b6b6b9b11y10y11y14	308842	1857	182656123619213	817707490794755	0.0152	Green	23755	20209894	20209915	302220	6257	6257.00	2.70	3
1363	NCDO2118_RS07190	ATP-dependent 6-phosphofructokinase 1501063:1502085 reverse MW:35806	Regular	24520410	0	358627035	91	10	23	56.76	410581	361790	174551	0	6	Pass1	PepFrag1	None	42181129	LTEHGFPAVGLPGTIDNDIVGTDFTIGFDTAVSTVVDALDK	LTEHGFPAVGLPGTIDNDIVGTDFTIGFDTAVSTVVDALDK	111	41	3.53	2421	8	8	1	0	8592446	63236	Missing	836	3.9	b8b12b13b19b21y5y7y9y10y13y15y16	423839	3930	301084224596082	110542112298041	0.0120	Green	54712	42181284	42181191	510353	4920	4920.00	3.63	4
1363	NCDO2118_RS07190	ATP-dependent 6-phosphofructokinase 1501063:1502085 reverse MW:35806	Regular	24520410	0	358627035	91	10	23	56.76	410581	361790	174551	0	7	Pass2	PepFrag2	None	10135738	DGIGGVAVGIR	DGIGGVAVGIR	277	11	7.00	2423	11	11	7	4	95221260	73683		10531	4.5	b2b3b4b5b8b11y5y6y7y8y9y11	206156	956	117327071037588	773270710375882	0.0652	Green	4519	10135788	10135818	213569	26774	26774.00	1.89	2
1363	NCDO2118_RS07190	ATP-dependent 6-phosphofructokinase 1501063:1502085 reverse MW:35806	Regular	24520410	0	358627035	91	10	23	56.76	410581	361790	174551	0	8	Pass2	MissedCleavage	None	20020716	AGLELYRLNSALNNLNLN	AGLELYRLNSALNNLNLN	322	18	7.00	2424	0	0	0	0	2337592	57583		226	2.2	y3*y5*	383754	1877	183965258881789	826435059211928	0.0054	Yellow	44553	20020774	20020796	392614	2199	2199.00	3.00	3
1363	NCDO2118_RS07190	ATP-dependent 6-phosphofructokinase 1501063:1502085 reverse MW:35806	Regular	24520410	0	358627035	91	10	23	56.76	410581	361790	174551	0	9	Pass2	VarMod	Carbamidomethyl C(28);Phosphoryl STY(1)	33676062	TFVVEVMGRNAGDIALNAGIAAGADDICIPEK	TFVVEVMGRNAGDIALNAGIAAGADDICIPEK	162	32	3.86	2426	4	4	0	0	4244479	60174	Missing	2815	3.0	b1-H3PO4b8-H3PO4b23y12y12y15y32	392163	3023	25276585051311	12851056700874	0.0075	Green	52727	33676214	33676074	480594	3065	3065.00	3.00	3
1363	NCDO2118_RS07190	ATP-dependent 6-phosphofructokinase 1501063:1502085 reverse MW:35806	Regular	24520410	0	358627035	91	10	23	56.76	410581	361790	174551	0	10	Pass2	VarMod	Oxidation M(20)	21650808	KFGIEGVVVIGGDGSYHGAMR	KFGIEGVVVIGGDGSYHGAMR	90	21	7.74	2425	2	2	0	1	3705681	59584		171	2.1	b7y14	468568	1992	19140466729043	15140466729043	0.0040	Yellow	49913	21650670	21650651	448697	1623	1623.00	2.25	2
1363	NCDO2118_RS07190	ATP-dependent 6-phosphofructokinase 1501063:1502085 reverse MW:35806	Regular	24520410	0	358627035	91	10	23	56.76	410581	361790	174551	0	11	Pass2	InSource	None	7284414	GGVAVGIR	DGIGGVAVGIR	280	8	11.05	2423	2	2	0	0	1930477	0.0000		2396	0.0	b4y8	206156	693	946778652848494	149355730569699	0.0106	Green	4527	7284400	7284424	213633	4357	4357.00	1.00	1
1363	NCDO2118_RS07190	ATP-dependent 6-phosphofructokinase 1501063:1502085 reverse MW:35806	Regular	24520410	0	358627035	91	10	23	56.76	410581	361790	174551	0	12	Pass2	InSource	None	7584407	AGIEQLK	YPEFAQVEGQLAGIEQLK	83	7	7.00	2419	3	3	1	0	4173720	0.0000		1049	0.0	b3b4y3*y4*y7	362101	721	97211238753916	154422477507832	0.0068	Green	31255	7584376	7584400	332094	2775	2775.00	1.00	1
1363	NCDO2118_RS07190	ATP-dependent 6-phosphofructokinase 1501063:1502085 reverse MW:35806	Regular	24520410	0	358627035	91	10	23	56.76	410581	361790	174551	0	13	Pass2	InSource	None	6874036	GIEQLK	YPEFAQVEGQLAGIEQLK	84	6	7.00	2419	2	2	0	0	12713490	0.0000		502	0.0	b4y3*y4y6	362101	654	910915586100609	142183117220122	0.0061	Green	31318	6874011	6874035	332271	2509	2509.00	1.00	1
1363	NCDO2118_RS07190	ATP-dependent 6-phosphofructokinase 1501063:1502085 reverse MW:35806	Regular	7262015	0	358627035	16	3	23	8.53	31146	35053.5	8846	1	1	Pass1	PepFrag1	None	20200386	YPEFAQVEGQLAGIEQLK	YPEFAQVEGQLAGIEQLK	72	18	3.96	763	13	13	6	4	114623900	69203	Missing	7190	4.7	b5b7b8b9b10b10b12y4y6y7y8y10y11y18	340782	1877	183965258881789	826435059211928	0.5884	Yellow	9295	20200393	20200403	342801	18327	18327.00	2.54	3
1363	NCDO2118_RS07190	ATP-dependent 6-phosphofructokinase 1501063:1502085 reverse MW:35806	Regular	7262015	0	358627035	16	3	23	8.53	31146	35053.5	8846	0	2	Pass1	PepFrag1	None	10135738	DGIGGVAVGIR	DGIGGVAVGIR	277	11	7.00	762	3	3	1	0	36293670	64209		1501	2.5	y5y7y8	214508	956	117327071037588	773270710375882	0.1619	Yellow	6962	10135707	10135725	230057	5042	5042.00	2.00	2
1363	NCDO2118_RS07190	ATP-dependent 6-phosphofructokinase 1501063:1502085 reverse MW:35806	Regular	7262015	0	358627035	16	3	23	8.53	31146	35053.5	8846	0	3	Pass2	PepFrag2	None	9714945	GGTFLYSAR	GGTFLYSAR	63	9	9.84	764	0	0	0	0	736025	47280		155	2.7	y6	222641	877	110770988111791	707709881117911	0.2497	Red	4191	9714758	9714777	162375	7777	7777.00	2.00	2
1363	NCDO2118_RS07190	ATP-dependent 6-phosphofructokinase 1501063:1502085 reverse MW:35806	Regular	37218110	0	358627035	52	7	23	31.47	329401	265330	246812	1	1	Pass1	PepFrag1	None	10135738	DGIGGVAVGIR	DGIGGVAVGIR	277	11	7.00	423	20	20	17	8	1004601000	85727		210577	9.2	b2b3b3b4b4b5b5b6b7b8b9b10b11y1y2y3y4y5y6y7y8y9y10y11	217141	956	117327071037588	194654142075176	0.5711	Green	8634	10135762	10135776	225690	188133	188133.00	1.56	1
1363	NCDO2118_RS07190	ATP-dependent 6-phosphofructokinase 1501063:1502085 reverse MW:35806	Regular	37218110	0	358627035	52	7	23	31.47	329401	265330	246812	0	2	Pass1	PepFrag1	None	7004352	AVELLR	AVELLR	271	6	7.00	427	8	8	5	3	155414700	77622		27519	4.0	b2b3b4b5y1y2y3y6	183432	677	932149161649599	14642983232992	0.1331	Green	4995	7004331	7004351	190996	43833	43833.00	1.00	1
1363	NCDO2118_RS07190	ATP-dependent 6-phosphofructokinase 1501063:1502085 reverse MW:35806	Regular	37218110	0	358627035	52	7	23	31.47	329401	265330	246812	0	3	Pass1	PepFrag1	Carbamidomethyl C(19)	22691129	NAGDIALNAGIAAGADDICIPEK	NAGDIALNAGIAAGADDICIPEK	171	23	3.50	424	3	3	1	0	7882060	64674	Missing	322	3.4	b11*y5y10y11	316240	2051	1951656614265	901104409510003	0.0178	Green	13730	22691123	22691121	294340	5861	5861.00	2.50	3
1363	NCDO2118_RS07190	ATP-dependent 6-phosphofructokinase 1501063:1502085 reverse MW:35806	Regular	37218110	0	358627035	52	7	23	31.47	329401	265330	246812	0	4	Pass1	PepFrag1	None	42181129	LTEHGFPAVGLPGTIDNDIVGTDFTIGFDTAVSTVVDALDK	LTEHGFPAVGLPGTIDNDIVGTDFTIGFDTAVSTVVDALDK	111	41	3.53	425	4	4	0	0	10172820	65782	Identified	315	3.7	b11y9y11y15	393183	3930	301084224596082	110542112298041	0.0125	Green	17456	42181422	42181422	509534	4117	4117.00	3.70	4
1363	NCDO2118_RS07190	ATP-dependent 6-phosphofructokinase 1501063:1502085 reverse MW:35806	Regular	37218110	0	358627035	52	7	23	31.47	329401	265330	246812	0	5	Pass1	PepFrag1	None	9714945	GGTFLYSAR	GGTFLYSAR	63	9	9.84	422	1	1	0	0	1713176	58046		228	1.2	b7y8	206844	877	110770988111791	707709881117911	0.0026	Green	7391	9714886	9714916	214370	852	852.00	2.00	2
1363	NCDO2118_RS07190	ATP-dependent 6-phosphofructokinase 1501063:1502085 reverse MW:35806	Regular	37218110	0	358627035	52	7	23	31.47	329401	265330	246812	0	6	Pass2	PepFrag2	None	11906164	FENVVNNINK	FENVVNNINK	197	10	7.00	426	3	3	0	0	5227582	62891		1267	4.7	b9y5y8y9y10*	176783	1097	128596965077436	885969650774356	0.1013	Green	3142	11906235	11906263	170170	33364	33364.00	2.00	2
1363	NCDO2118_RS07190	ATP-dependent 6-phosphofructokinase 1501063:1502085 reverse MW:35806	Regular	37218110	0	358627035	52	7	23	31.47	329401	265330	246812	0	7	Pass2	PepFrag2	None	8214516	AGLELYR	AGLELYR	322	7	7.00	428	2	2	0	0	713487	54241		271	4.0	b5b5y7	186137	761	100774210720246	161548421440491	0.0905	Yellow	11626	8214407	8214426	261458	29819	29819.00	1.00	1
1363	NCDO2118_RS07190	ATP-dependent 6-phosphofructokinase 1501063:1502085 reverse MW:35806	Regular	37218110	0	358627035	52	7	23	31.47	329401	265330	246812	0	8	Pass2	InSource	None	5153300	AVGIR	DGIGGVAVGIR	283	5	11.05	423	7	7	3	2	52506450	0.0000		6040	0.0	b2b3b5y1y2y3y5	217141	492	75347648430133	110695296860266	0.0563	Green	8631	5153276	5153296	225686	18560	18560.00	1.00	1
1363	NCDO2118_RS07190	ATP-dependent 6-phosphofructokinase 1501063:1502085 reverse MW:35806	Regular	37218110	0	358627035	52	7	23	31.47	329401	265330	246812	0	9	Pass2	InSource	None	6693566	DGIGGVAV	DGIGGVAVGIR	277	8	3.10	423	4	4	2	0	28910810	0.0000		273	0.0	b3b5b6b7b7	217141	636	894123915508906	138824783101781	0.0148	Green	8643	6693516	6693537	225757	4862	4862.00	1.00	1
1363	NCDO2118_RS07190	ATP-dependent 6-phosphofructokinase 1501063:1502085 reverse MW:35806	Regular	60814640	0	358627035	91	12	23	58.53	442607	370215	338785	1	1	Pass1	PepFrag1	None	20200386	YPEFAQVEGQLAGIEQLK	YPEFAQVEGQLAGIEQLK	72	18	3.96	260	31	31	26	13	828339900	87022	Identified	135846	11.2	b2b3b4b5b6b7b7*b8b8*b8b9b9b10b10b11b11b12b13b14b14*b15b17b18b18y1y2y3y4y4*y5y6y6y7y7*y7y8y9y10y10*y11y11*y11y12y13y14y15y16y17y18y18*	340647	1877	183965258881789	143965258881789	0.4441	Green	14916	20200388	20200364	339450	196570	196570.00	2.35	2
1363	NCDO2118_RS07190	ATP-dependent 6-phosphofructokinase 1501063:1502085 reverse MW:35806	Regular	60814640	0	358627035	91	12	23	58.53	442607	370215	338785	0	2	Pass1	PepFrag1	None	10135738	DGIGGVAVGIR	DGIGGVAVGIR	277	11	7.00	265	18	18	14	7	390501200	83756		137410	7.3	b2b3b3b4b4b5b5b6b6b7b8b9b11b11y1y3y4y5y6y7y8y9y10y11	217235	956	117327071037588	773270710375882	0.2216	Green	5929	10135753	10135781	226043	98081	98081.00	1.65	2
1363	NCDO2118_RS07190	ATP-dependent 6-phosphofructokinase 1501063:1502085 reverse MW:35806	Regular	60814640	0	358627035	91	12	23	58.53	442607	370215	338785	0	3	Pass1	PepFrag1	None	7004352	AVELLR	AVELLR	271	6	7.00	264	9	9	5	3	190143200	80631		46114	4.0	b2b3b4b5b6y1y3y4y6	188302	677	932149161649599	14642983232992	0.1707	Green	3053	7004351	7004370	190340	75564	75564.00	1.00	1
1363	NCDO2118_RS07190	ATP-dependent 6-phosphofructokinase 1501063:1502085 reverse MW:35806	Regular	60814640	0	358627035	91	12	23	58.53	442607	370215	338785	0	4	Pass1	PepFrag1	Carbamidomethyl C(19)	22691129	NAGDIALNAGIAAGADDICIPEK	NAGDIALNAGIAAGADDICIPEK	171	23	3.50	259	3	3	0	0	801941	56882	Missing	531	2.1	b12b12*b13y10y10y23	330253	2051	1951656614265	901104409510003	0.0037	Green	11722	22690986	22690990	293419	1629	1629.00	2.63	3
1363	NCDO2118_RS07190	ATP-dependent 6-phosphofructokinase 1501063:1502085 reverse MW:35806	Regular	60814640	0	358627035	91	12	23	58.53	442607	370215	338785	0	5	Pass1	PepFrag1	None	29044724	NEELVESPILGTAEEGALFSLTTEGGIK	NEELVESPILGTAEEGALFSLTTEGGIK	288	28	3.58	261	1	1	0	0	4439635	64314	Missing	92	1.9	b16y10	408972	2710	235002506696719	116668337797813	0.0021	Green	17284	29044688	29044626	406391	922	922.00	3.00	3
1363	NCDO2118_RS07190	ATP-dependent 6-phosphofructokinase 1501063:1502085 reverse MW:35806	Regular	60814640	0	358627035	91	12	23	58.53	442607	370215	338785	0	6	Pass2	PepFrag2	None	21961118	NHHIIVLAEGVMTGEEFATK	NHHIIVLAEGVMTGEEFATK	213	20	5.23	263	1	1	0	0	679124	56160		508	2.3	b10*y20	343767	2051	1951656614265	1551656614265	0.0050	Yellow	16509	21960947	21960905	378341	2223	2223.00	2.13	2
1363	NCDO2118_RS07190	ATP-dependent 6-phosphofructokinase 1501063:1502085 reverse MW:35806	Regular	60814640	0	358627035	91	12	23	58.53	442607	370215	338785	0	7	Pass2	PepFrag2	None	11906164	FENVVNNINK	FENVVNNINK	197	10	7.00	262	2	2	0	0	6398760	65901		132	1.6	b3y6	188880	1097	128596965077436	885969650774356	0.0037	Green	2574	11906226	11906252	183427	1647	1647.00	2.00	2
1363	NCDO2118_RS07190	ATP-dependent 6-phosphofructokinase 1501063:1502085 reverse MW:35806	Regular	60814640	0	358627035	91	12	23	58.53	442607	370215	338785	0	8	Pass2	PepFrag2	None	20209909	FGIEGVVVIGGDGSYHGAMR	FGIEGVVVIGGDGSYHGAMR	91	20	5.22	270	1	1	0	0	5181620	64985		444	2.0	y11y20	289331	1857	182656123619213	142656123619213	0.0036	Green	10798	20209508	20209484	279996	1598	1598.00	2.00	2
1363	NCDO2118_RS07190	ATP-dependent 6-phosphofructokinase 1501063:1502085 reverse MW:35806	Regular	60814640	0	358627035	91	12	23	58.53	442607	370215	338785	0	9	Pass2	PepFrag2	None	8214516	AGLELYR	AGLELYR	322	7	7.00	266	0	0	0	0	932942	57539		31	1.3	y6	184288	761	100774210720246	161548421440491	0.0031	Green	9303	8214421	8214439	260594	1377	1377.00	1.00	1
1363	NCDO2118_RS07190	ATP-dependent 6-phosphofructokinase 1501063:1502085 reverse MW:35806	Regular	60814640	0	358627035	91	12	23	58.53	442607	370215	338785	0	10	Pass2	MissedCleavage	None	18699963	RIAVLTSGGDAPGMNAAIR	RIAVLTSGGDAPGMNAAIR	2	19	10.89	267	2	2	0	0	2829409	62357	Missing	575	2.2	y15y17*y19	250697	1752	175704291367449	135704291367449	0.0046	Green	13911	18700126	18700115	322697	2026	2026.00	2.00	2
1363	NCDO2118_RS07190	ATP-dependent 6-phosphofructokinase 1501063:1502085 reverse MW:35806	Regular	60814640	0	358627035	91	12	23	58.53	442607	370215	338785	0	11	Pass2	VarMod	Phosphoryl STY(13)	25172571	NHHIIVLAEGVMTGEEFATKLK	NHHIIVLAEGVMTGEEFATKLK	213	22	6.04	269	2	2	0	0	3495883	63276		3622	5.4	b5*b6*b22*y13-H3PO4y15-H3PO4y16-H3PO4y19y22y22*	348813	2310	211268275550397	100845517033598	0.0480	Green	14087	25172544	25172526	325852	21224	21224.00	2.71	3
1363	NCDO2118_RS07190	ATP-dependent 6-phosphofructokinase 1501063:1502085 reverse MW:35806	Regular	60814640	0	358627035	91	12	23	58.53	442607	370215	338785	0	12	Pass2	VarMod	Oxidation M(19)	35827785	KAISEGIEVYGINHGYAGMVAGDIFPLTSASVGDK	KAISEGIEVYGINHGYAGMVAGDIFPLTSASVGDK	25	35	4.54	268	2	2	0	0	2181320	61227	Missing	83	2.7	b22y16	358575	3318	268953513428054	944767567140267	0.0045	Green	16489	35828009	35828009	377641	2001	2001.00	3.67	4
1363	NCDO2118_RS07190	ATP-dependent 6-phosphofructokinase 1501063:1502085 reverse MW:35806	Regular	60814640	0	358627035	91	12	23	58.53	442607	370215	338785	0	13	Pass2	InSource	None	6714199	GVAVGIR	DGIGGVAVGIR	281	7	11.05	265	5	5	0	0	8697926	0.0000		7331	0.0	b3b5b7y1y7	217235	645	902539276707172	140507855341434	0.0287	Green	5903	6714185	6714204	225825	12716	12716.00	1.00	1
1363	NCDO2118_RS07190	ATP-dependent 6-phosphofructokinase 1501063:1502085 reverse MW:35806	Regular	60814640	0	358627035	91	12	23	58.53	442607	370215	338785	0	14	Pass2	InSource	None	5153300	AVGIR	DGIGGVAVGIR	283	5	11.05	265	5	5	1	1	26864720	0.0000		4072	0.0	b2b3y1y3y5	217235	492	75347648430133	110695296860266	0.0276	Green	5896	5153275	5153292	225789	12194	12194.00	1.00	1
1363	NCDO2118_RS07190	ATP-dependent 6-phosphofructokinase 1501063:1502085 reverse MW:35806	Regular	60814640	0	358627035	91	12	23	58.53	442607	370215	338785	0	15	Pass2	InSource	None	7584407	AGIEQLK	YPEFAQVEGQLAGIEQLK	83	7	7.00	260	3	3	0	0	12401670	0.0000		781	0.0	b4y4y7	340647	721	97211238753916	154422477507832	0.0064	Green	14918	7584409	7584427	339463	2819	2819.00	1.00	1
1363	NCDO2118_RS07190	ATP-dependent 6-phosphofructokinase 1501063:1502085 reverse MW:35806	Regular	60814640	0	358627035	91	12	23	58.53	442607	370215	338785	0	16	Pass2	InSource	None	6693566	DGIGGVAV	DGIGGVAVGIR	277	8	3.10	265	1	1	0	0	4365710	0.0000		125	0.0	b6b7b7	217235	636	894123915508906	138824783101781	0.0059	Green	5886	6693568	6693587	225745	2625	2625.00	1.00	1
1363	NCDO2118_RS07190	ATP-dependent 6-phosphofructokinase 1501063:1502085 reverse MW:35806	Regular	60814640	0	358627035	91	12	23	58.53	442607	370215	338785	0	17	Pass2	InSource	None	6874036	GIEQLK	YPEFAQVEGQLAGIEQLK	84	6	7.00	260	3	3	1	0	6117327	0.0000		480	0.0	b3b4y6	340647	654	910915586100609	142183117220122	0.0055	Green	14933	6874028	6874047	339635	2450	2450.00	1.00	1
1363	NCDO2118_RS07190	ATP-dependent 6-phosphofructokinase 1501063:1502085 reverse MW:35806	Regular	60814640	0	358627035	91	12	23	58.53	442607	370215	338785	0	18	Pass2	InSource	None	12626052	YPEFAQVEGQL	YPEFAQVEGQLAGIEQLK	72	11	3.13	260	0	0	0	0	2425457	0.0000	Missing	68	0.0	y8*	340647	1156	133167482703312	931674827033122	0.0047	Green	14909	12626000	12626024	339379	2083	2083.00	2.00	2
1363	NCDO2118_RS07190	ATP-dependent 6-phosphofructokinase 1501063:1502085 reverse MW:35806	Regular	60814640	0	358627035	91	12	23	58.53	442607	370215	338785	0	19	Pass2	InSource	None	4442929	VGIR	DGIGGVAVGIR	284	4	11.05	265	2	2	0	0	1533529	0.0000		505	0.0	y1y4	217235	425	683416700833789	966833401667577	0.0043	Green	5918	4442895	4442912	225894	1896	1896.00	1.00	1
1363	NCDO2118_RS07190	ATP-dependent 6-phosphofructokinase 1501063:1502085 reverse MW:35806	Regular	60814640	0	358627035	91	12	23	58.53	442607	370215	338785	0	20	Pass2	InSource	None	5702882	DGIGGVA	DGIGGVAVGIR	277	7	3.10	265	0	0	0	0	767390	0.0000		35	0.0	b7	217235	531	792786017064859	118557203412972	0.0022	Green	5904	5702854	5702872	225825	962	962.00	1.00	1
1363	NCDO2118_RS07190	ATP-dependent 6-phosphofructokinase 1501063:1502085 reverse MW:35806	Regular	2072103	0	358627035	11	2	23	8.53	10919	16378.5	4294	1	1	Pass1	PepFrag1	None	20200386	YPEFAQVEGQLAGIEQLK	YPEFAQVEGQLAGIEQLK	72	18	3.96	512	8	8	3	2	32378850	58267	Missing	3506	3.6	b6b7b10b12y6y7y8y18	343354	1877	183965258881789	826435059211928	0.7725	Yellow	5091	20200330	20200363	341469	8435	8435.00	2.57	3
1363	NCDO2118_RS07190	ATP-dependent 6-phosphofructokinase 1501063:1502085 reverse MW:35806	Regular	2072103	0	358627035	11	2	23	8.53	10919	16378.5	4294	0	2	Pass1	PepFrag1	None	10135738	DGIGGVAVGIR	DGIGGVAVGIR	277	11	7.00	511	3	3	1	0	11063230	53603		788	1.9	y5y7y8	192821	956	117327071037588	773270710375882	0.2275	Yellow	3592	10135654	10135682	227595	2484	2484.00	2.00	2
1363	NCDO2118_RS07190	ATP-dependent 6-phosphofructokinase 1501063:1502085 reverse MW:35806	Regular	39090890	0	358627035	75	9	23	39.12	375737	197076	302028	1	1	Pass1	PepFrag1	None	10135738	DGIGGVAVGIR	DGIGGVAVGIR	277	11	7.00	263	20	20	17	8	1069186000	86211		189254	8.5	b2b3b3b4b4b5b5b6b6b7b8b8b9b11y1y2y3y4y5y6y7y8y9y10y11	211047	956	117327071037588	194654142075176	0.4014	Green	7378	10135745	10135756	226105	150818	150818.00	1.52	1
1363	NCDO2118_RS07190	ATP-dependent 6-phosphofructokinase 1501063:1502085 reverse MW:35806	Regular	39090890	0	358627035	75	9	23	39.12	375737	197076	302028	0	2	Pass1	PepFrag1	None	7004352	AVELLR	AVELLR	271	6	7.00	267	9	9	6	3	131862800	77122		27269	4.0	b2b3b4b5b6y1y2y3y6	185956	677	932149161649599	14642983232992	0.1138	Green	4197	7004349	7004368	191948	42771	42771.00	1.00	1
1363	NCDO2118_RS07190	ATP-dependent 6-phosphofructokinase 1501063:1502085 reverse MW:35806	Regular	39090890	0	358627035	75	9	23	39.12	375737	197076	302028	0	3	Pass1	PepFrag1	None	42181129	LTEHGFPAVGLPGTIDNDIVGTDFTIGFDTAVSTVVDALDK	LTEHGFPAVGLPGTIDNDIVGTDFTIGFDTAVSTVVDALDK	111	41	3.53	265	7	7	2	0	14393070	67502	Missing	1257	3.5	y6y8y9y10y13y15y41	391935	3930	301084224596082	110542112298041	0.0093	Green	15782	42181182	42181182	509860	3487	3487.00	3.69	4
1363	NCDO2118_RS07190	ATP-dependent 6-phosphofructokinase 1501063:1502085 reverse MW:35806	Regular	39090890	0	358627035	75	9	23	39.12	375737	197076	302028	0	4	Pass1	PepFrag1	None	9714945	GGTFLYSAR	GGTFLYSAR	63	9	9.84	261	4	4	0	0	7056239	64406		294	1.5	b3b7y1y4y9	206352	877	110770988111791	707709881117911	0.0045	Green	6285	9714928	9714963	214819	1708	1708.00	1.71	2
1363	NCDO2118_RS07190	ATP-dependent 6-phosphofructokinase 1501063:1502085 reverse MW:35806	Regular	39090890	0	358627035	75	9	23	39.12	375737	197076	302028	0	5	Pass1	PepFrag1	None	21961118	NHHIIVLAEGVMTGEEFATK	NHHIIVLAEGVMTGEEFATK	213	20	5.23	264	0	0	0	0	1124276	56429		39	1.8	y9	310103	2051	1951656614265	901104409510003	0.0031	Green	14056	21961245	21961244	344715	1178	1178.00	3.00	3
1363	NCDO2118_RS07190	ATP-dependent 6-phosphofructokinase 1501063:1502085 reverse MW:35806	Regular	39090890	0	358627035	75	9	23	39.12	375737	197076	302028	0	6	Pass1	PepFrag1	None	20200386	YPEFAQVEGQLAGIEQLK	YPEFAQVEGQLAGIEQLK	72	18	3.96	266	1	1	0	0	1425240	57460	Missing	601	1.7	b6*b9y18	328255	1877	183965258881789	143965258881789	0.0031	Green	13944	20200326	20200297	339850	1176	1176.00	2.49	2
1363	NCDO2118_RS07190	ATP-dependent 6-phosphofructokinase 1501063:1502085 reverse MW:35806	Regular	39090890	0	358627035	75	9	23	39.12	375737	197076	302028	0	7	Pass1	PepFrag1	None	11906164	FENVVNNINK	FENVVNNINK	197	10	7.00	262	0	0	0	0	480640	52739		35	1.2	b6*	179805	1097	128596965077436	885969650774356	0.0021	Yellow	6603	11906066	11906097	218137	802	802.00	2.00	2
1363	NCDO2118_RS07190	ATP-dependent 6-phosphofructokinase 1501063:1502085 reverse MW:35806	Regular	39090890	0	358627035	75	9	23	39.12	375737	197076	302028	0	8	Pass2	PepFrag2	None	8214516	AGLELYR	AGLELYR	322	7	7.00	269	1	1	0	0	422578	52180		150	3.7	b5y7	189469	761	100774210720246	161548421440491	0.0649	Yellow	10198	8214392	8214409	261713	24373	24373.00	1.00	1
1363	NCDO2118_RS07190	ATP-dependent 6-phosphofructokinase 1501063:1502085 reverse MW:35806	Regular	39090890	0	358627035	75	9	23	39.12	375737	197076	302028	0	9	Pass2	PepFrag2	None	11996379	LNSALNNLNLN	LNSALNNLNLN	329	11	6.13	268	2	2	0	1	2650432	60154		191	1.7	b2y9	242609	1116	130077574610854	90077574610854	0.0046	Green	5963	11996655	11996686	211481	1735	1735.00	2.00	2
1363	NCDO2118_RS07190	ATP-dependent 6-phosphofructokinase 1501063:1502085 reverse MW:35806	Regular	39090890	0	358627035	75	9	23	39.12	375737	197076	302028	0	10	Pass2	InSource	None	7284414	GGVAVGIR	DGIGGVAVGIR	280	8	11.05	263	12	12	9	5	190933400	0.0000		63674	0.0	b3b4b5b6b7b8y1y2y3y4y5y8	211047	693	946778652848494	149355730569699	0.2638	Green	7369	7284390	7284409	226082	99128	99128.00	1.00	1
1363	NCDO2118_RS07190	ATP-dependent 6-phosphofructokinase 1501063:1502085 reverse MW:35806	Regular	39090890	0	358627035	75	9	23	39.12	375737	197076	302028	0	11	Pass2	InSource	None	6714199	GVAVGIR	DGIGGVAVGIR	281	7	11.05	263	7	7	2	1	30006350	0.0000		10517	0.0	b3b5b6b7y1y3y7	211047	645	902539276707172	140507855341434	0.0516	Green	7363	6714188	6714208	226070	19396	19396.00	1.00	1
1363	NCDO2118_RS07190	ATP-dependent 6-phosphofructokinase 1501063:1502085 reverse MW:35806	Regular	39090890	0	358627035	75	9	23	39.12	375737	197076	302028	0	12	Pass2	InSource	None	5153300	AVGIR	DGIGGVAVGIR	283	5	11.05	263	7	7	3	1	31585570	0.0000		5713	0.0	b2b3b5y1y2y4y5	211047	492	75347648430133	110695296860266	0.0502	Green	7375	5153280	5153299	226092	18854	18854.00	1.00	1
1363	NCDO2118_RS07190	ATP-dependent 6-phosphofructokinase 1501063:1502085 reverse MW:35806	Regular	39090890	0	358627035	75	9	23	39.12	375737	197076	302028	0	13	Pass2	InSource	None	6143984	VAVGIR	DGIGGVAVGIR	282	6	11.05	263	3	3	0	0	3459771	0.0000		2321	0.0	b2b4y6	211047	597	85718755065108	131437510130216	0.0137	Green	7365	6143973	6143993	226077	5161	5161.00	1.00	1
1363	NCDO2118_RS07190	ATP-dependent 6-phosphofructokinase 1501063:1502085 reverse MW:35806	Regular	39090890	0	358627035	75	9	23	39.12	375737	197076	302028	0	14	Pass2	InSource	None	8985469	GIGGVAVGIR	DGIGGVAVGIR	278	10	11.05	263	0	0	0	0	1437773	0.0000		0	0.0		211047	865	109758215932617	697582159326165	0.0053	Green	7376	8985424	8985460	226093	1982	1982.00	2.00	2
1363	NCDO2118_RS07190	ATP-dependent 6-phosphofructokinase 1501063:1502085 reverse MW:35806	Regular	39090890	0	358627035	75	9	23	39.12	375737	197076	302028	0	15	Pass2	InSource	None	4442929	VGIR	DGIGGVAVGIR	284	4	11.05	263	2	2	0	0	3053243	0.0000		680	0.0	y1y4	211047	425	683416700833789	966833401667577	0.0049	Green	7367	4442904	4442922	226079	1842	1842.00	1.00	1
1363	NCDO2118_RS07190	ATP-dependent 6-phosphofructokinase 1501063:1502085 reverse MW:35806	Regular	39090890	0	358627035	75	9	23	39.12	375737	197076	302028	0	16	Pass2	InSource	None	5702882	DGIGGVA	DGIGGVAVGIR	277	7	3.10	263	0	0	0	0	4158126	0.0000		33	0.0	b6	211047	531	792786017064859	118557203412972	0.0035	Green	7357	5702866	5702886	226032	1326	1326.00	1.00	1
1363	NCDO2118_RS07190	ATP-dependent 6-phosphofructokinase 1501063:1502085 reverse MW:35806	Regular	94261850	0	358627035	75	7	23	22.35	328364	306079	227171	1	1	Pass1	PepFrag1	None	20200386	YPEFAQVEGQLAGIEQLK	YPEFAQVEGQLAGIEQLK	72	18	3.96	108	31	31	28	13	1468714000	91413	Identified	114453	10.9	b2b3b4b5b6b7b7*b8b8*b9b9*b9b10b10b11b12b13b14b14*b15y1y2y3y3*y4y5y6y6y7y8y9y9y10y11y11y12y13y15y16y17y18y18*	340775	1877	183965258881789	143965258881789	0.5481	Green	13002	20200430	20200402	339695	179972	179972.00	2.40	2
1363	NCDO2118_RS07190	ATP-dependent 6-phosphofructokinase 1501063:1502085 reverse MW:35806	Regular	94261850	0	358627035	75	7	23	22.35	328364	306079	227171	0	2	Pass1	PepFrag1	None	10135738	DGIGGVAVGIR	DGIGGVAVGIR	277	11	7.00	107	17	17	13	5	417515400	85950		75659	6.7	b2b3b3b4b4b5b5b6b7b11b11y1y2y3y4y5y6y7y8y9y10y11	221169	956	117327071037588	773270710375882	0.2355	Green	4940	10135775	10135800	226273	77321	77321.00	1.85	2
1363	NCDO2118_RS07190	ATP-dependent 6-phosphofructokinase 1501063:1502085 reverse MW:35806	Regular	94261850	0	358627035	75	7	23	22.35	328364	306079	227171	0	3	Pass1	PepFrag1	None	7004352	AVELLR	AVELLR	271	6	7.00	110	9	9	6	3	164460500	81904		29870	4.0	b2b3b4b5b6y1y2y3y6	190370	677	932149161649599	14642983232992	0.1486	Green	2573	7004346	7004364	190900	48786	48786.00	1.00	1
1363	NCDO2118_RS07190	ATP-dependent 6-phosphofructokinase 1501063:1502085 reverse MW:35806	Regular	94261850	0	358627035	75	7	23	22.35	328364	306079	227171	0	4	Pass1	PepFrag1	None	17138952	IAVLTSGGDAPGMNAAIR	IAVLTSGGDAPGMNAAIR	3	18	7.00	109	2	2	0	0	1818575	62341	Missing	351	1.6	b3y18	255440	1604	165664406959219	125664406959219	0.0030	Green	10261	17138953	17138950	298513	987	987.00	2.00	2
1363	NCDO2118_RS07190	ATP-dependent 6-phosphofructokinase 1501063:1502085 reverse MW:35806	Regular	94261850	0	358627035	75	7	23	22.35	328364	306079	227171	0	5	Pass2	VarMod	Phosphoryl STY(12)	15907788	VNNPHKAGLELYR	VNNPHKAGLELYR	316	13	9.72	113	2	2	0	1	3014668	64536	Missing	218	2.2	b7y6y6	165505	1401	151374152400878	111374152400878	0.0097	Green	11354	15907880	15907885	312802	3199	3199.00	2.00	2
1363	NCDO2118_RS07190	ATP-dependent 6-phosphofructokinase 1501063:1502085 reverse MW:35806	Regular	94261850	0	358627035	75	7	23	22.35	328364	306079	227171	0	6	Pass2	VarMod	Oxidation M(14)	18859912	RIAVLTSGGDAPGMNAAIR	RIAVLTSGGDAPGMNAAIR	2	19	10.89	112	1	1	0	0	1380166	61143	Missing	70	1.7	y7y10*	231730	1752	175704291367449	135704291367449	0.0031	Green	12196	18859931	18859915	326749	1024	1024.00	2.00	2
1363	NCDO2118_RS07190	ATP-dependent 6-phosphofructokinase 1501063:1502085 reverse MW:35806	Regular	94261850	0	358627035	75	7	23	22.35	328364	306079	227171	0	7	Pass2	VarMod	Oxidation M(7)	10535397	TFVVEVMGR	TFVVEVMGR	162	9	7.00	111	4	4	1	1	10108070	69790		356	1.2	b2b3b5b8y5y7	234260	972	118632535023639	78632535023639	0.0026	Green	3495	10535380	10535405	206170	846	846.00	2.00	2
1363	NCDO2118_RS07190	ATP-dependent 6-phosphofructokinase 1501063:1502085 reverse MW:35806	Regular	94261850	0	358627035	75	7	23	22.35	328364	306079	227171	0	8	Pass2	InSource	None	6714199	GVAVGIR	DGIGGVAVGIR	281	7	11.05	107	3	3	0	0	6712683	0.0000		3245	0.0	b3b5y7	221169	645	902539276707172	140507855341434	0.0188	Green	4929	6714171	6714188	226198	6182	6182.00	1.00	1
1363	NCDO2118_RS07190	ATP-dependent 6-phosphofructokinase 1501063:1502085 reverse MW:35806	Regular	94261850	0	358627035	75	7	23	22.35	328364	306079	227171	0	9	Pass2	InSource	None	5153300	AVGIR	DGIGGVAVGIR	283	5	11.05	107	3	3	0	0	1386374	0.0000		1927	0.0	b2y1y5	221169	492	75347648430133	110695296860266	0.0162	Green	4924	5153259	5153276	226168	5334	5334.00	1.00	1
1363	NCDO2118_RS07190	ATP-dependent 6-phosphofructokinase 1501063:1502085 reverse MW:35806	Regular	94261850	0	358627035	75	7	23	22.35	328364	306079	227171	0	10	Pass2	InSource	None	6874036	GIEQLK	YPEFAQVEGQLAGIEQLK	84	6	7.00	108	1	1	0	0	1474857	0.0000		318	0.0	y6	340775	654	910915586100609	142183117220122	0.0072	Green	12986	6874014	6874031	339560	2374	2374.00	1.00	1
1363	NCDO2118_RS07190	ATP-dependent 6-phosphofructokinase 1501063:1502085 reverse MW:35806	Regular	94261850	0	358627035	75	7	23	22.35	328364	306079	227171	0	11	Pass2	InSource	None	7584407	AGIEQLK	YPEFAQVEGQLAGIEQLK	83	7	7.00	108	2	2	0	0	9087539	0.0000		704	0.0	y3y7	340775	721	97211238753916	154422477507832	0.0071	Green	12992	7584384	7584401	339596	2339	2339.00	1.00	1
1363	NCDO2118_RS07190	ATP-dependent 6-phosphofructokinase 1501063:1502085 reverse MW:35806	Regular	7571794	0.31	358627035	49	10	23	50.59	202232	186756	60667	1	1	Pass1	PepFrag1	None	20200386	YPEFAQVEGQLAGIEQLK	YPEFAQVEGQLAGIEQLK	72	18	3.96	2918	21	21	10	4	84582940	68065	Missing	52471	8.8	b4b5b6b7b8b9b10b10*b10b11b11*b11b13b13b15b16b18y1y2y3*y4y6y7y8y9*y9y10y11*y12y13y16y18	365918	1877	183965258881789	143965258881789	0.4981	Green	21740	20200326	20200313	334814	100728	100728.00	2.38	2
1363	NCDO2118_RS07190	ATP-dependent 6-phosphofructokinase 1501063:1502085 reverse MW:35806	Regular	7571794	0.31	358627035	49	10	23	50.59	202232	186756	60667	0	2	Pass1	PepFrag1	None	10375448	TFVVEVMGR	TFVVEVMGR	162	9	7.00	2921	3	3	0	0	15608150	60726		1318	6.2	b2b9y6	254259	972	118632535023639	78632535023639	0.3848	Green	6755	10375381	10375409	254316	77820	77820.00	1.94	2
1363	NCDO2118_RS07190	ATP-dependent 6-phosphofructokinase 1501063:1502085 reverse MW:35806	Regular	7571794	0.31	358627035	49	10	23	50.59	202232	186756	60667	0	3	Pass1	PepFrag1	None	10135738	DGIGGVAVGIR	DGIGGVAVGIR	277	11	7.00	2917	5	5	3	0	21745390	62166		1936	2.9	b8y5y6y7y8y11	208768	956	117327071037588	773270710375882	0.0406	Green	2804	10135745	10135774	215381	8208	8208.00	1.95	2
1363	NCDO2118_RS07190	ATP-dependent 6-phosphofructokinase 1501063:1502085 reverse MW:35806	Regular	7571794	0.31	358627035	49	10	23	50.59	202232	186756	60667	0	4	Pass1	PepFrag1	None	9714945	GGTFLYSAR	GGTFLYSAR	63	9	9.84	2920	2	2	0	0	1255148	49779		271	2.1	y6y9	195207	877	110770988111791	181541976223582	0.0207	Red	17853	9714881	9714898	317045	4177	4177.00	1.32	1
1363	NCDO2118_RS07190	ATP-dependent 6-phosphofructokinase 1501063:1502085 reverse MW:35806	Regular	7571794	0.31	358627035	49	10	23	50.59	202232	186756	60667	0	5	Pass1	PepFrag1	None	42181129	LTEHGFPAVGLPGTIDNDIVGTDFTIGFDTAVSTVVDALDK	LTEHGFPAVGLPGTIDNDIVGTDFTIGFDTAVSTVVDALDK	111	41	3.53	2919	6	6	1	0	12155660	59640	Identified	629	3.4	b5b11b20y8y9y12y16	432441	3930	301084224596082	110542112298041	0.0158	Green	39958	42181124	42181023	510604	3204	3204.00	4.00	4
1363	NCDO2118_RS07190	ATP-dependent 6-phosphofructokinase 1501063:1502085 reverse MW:35806	Regular	7571794	0.31	358627035	49	10	23	50.59	202232	186756	60667	0	6	Pass2	PepFrag2	None	34386886	AISEGIEVYGINHGYAGMVAGDIFPLTSASVGDK	AISEGIEVYGINHGYAGMVAGDIFPLTSASVGDK	26	34	4.06	2925	5	5	0	0	4536052	55359	Missing	1277	2.7	b2b3b16b27b30y7y15	408654	3183	261607822891141	134405215260761	0.0101	Yellow	29025	34386978	34386850	374159	2039	2039.00	3.00	3
1363	NCDO2118_RS07190	ATP-dependent 6-phosphofructokinase 1501063:1502085 reverse MW:35806	Regular	7571794	0.31	358627035	49	10	23	50.59	202232	186756	60667	0	7	Pass2	PepFrag2	None	7004352	AVELLR	AVELLR	271	6	7.00	2926	2	2	0	0	1390026	50222		1426	1.2	b4y1	181288	677	932149161649599	14642983232992	0.0062	Red	7106	7004379	7004398	257482	1258	1258.00	1.00	1
1363	NCDO2118_RS07190	ATP-dependent 6-phosphofructokinase 1501063:1502085 reverse MW:35806	Regular	7571794	0.31	358627035	49	10	23	50.59	202232	186756	60667	0	8	Pass2	MissedCleavage	None	35938333	NEELVESPILGTAEEGALFSLTTEGGIKVNNPHK	NEELVESPILGTAEEGALFSLTTEGGIKVNNPHK	288	34	4.25	2922	0	0	0	0	7171134	57348	Missing	222	2.3	b29*y13*y14y28*	400883	3350	270680002746871	140453335164581	0.0070	Yellow	33967	35938515	35938361	417408	1420	1420.00	3.00	3
1363	NCDO2118_RS07190	ATP-dependent 6-phosphofructokinase 1501063:1502085 reverse MW:35806	Regular	7571794	0.31	358627035	49	10	23	50.59	202232	186756	60667	0	9	Pass2	VarMod	Oxidation M(7)	10535397	TFVVEVMGR	TFVVEVMGR	162	9	7.00	2923	2	2	0	0	4728897	55540		354	1.5	b5b6y6y7	254259	972	118632535023639	78632535023639	0.0080	Yellow	2426	10535386	10535414	210281	1611	1611.00	2.00	2
1363	NCDO2118_RS07190	ATP-dependent 6-phosphofructokinase 1501063:1502085 reverse MW:35806	Regular	7571794	0.31	358627035	49	10	23	50.59	202232	186756	60667	0	10	Pass2	VarMod	Phosphoryl STY(12)	17148748	VSVLGHIQRGGSPTAR	VSVLGHIQRGGSPTAR	244	16	12.40	2924	2	2	0	0	2353983	52510	Identified	553	1.5	b10b12b13b15y5y15	135611	1526	160249244219217	120249244219217	0.0046	Yellow	17233	17148854	17148861	314586	934	934.00	2.00	2
1363	NCDO2118_RS07190	ATP-dependent 6-phosphofructokinase 1501063:1502085 reverse MW:35806	Regular	7571794	0.31	358627035	49	10	23	50.59	202232	186756	60667	0	11	Pass2	InSource	None	6874036	GIEQLK	YPEFAQVEGQLAGIEQLK	84	6	7.00	2918	1	1	0	0	1438686	0.0000		210	0.0	y6	365918	654	910915586100609	142183117220122	0.0041	Green	21766	6874039	6874058	334932	833	833.00	1.00	1
1363	NCDO2118_RS07190	ATP-dependent 6-phosphofructokinase 1501063:1502085 reverse MW:35806	Regular	12536970	0.32	358627035	64	12	23	48.82	314881	268515	108338	1	1	Pass1	PepFrag1	None	20200386	YPEFAQVEGQLAGIEQLK	YPEFAQVEGQLAGIEQLK	72	18	3.96	3162	21	21	14	5	137463100	72364	Identified	88695	10.7	b5b6b7b8b8*b10b10b17b18y1y3y3*y4y5y5*y6y7y8y9y9*y10y11y13y14y15y15y17y18	371926	1877	183965258881789	143965258881789	0.5432	Green	26631	20200331	20200330	333306	171030	171030.00	2.34	2
1363	NCDO2118_RS07190	ATP-dependent 6-phosphofructokinase 1501063:1502085 reverse MW:35806	Regular	12536970	0.32	358627035	64	12	23	48.82	314881	268515	108338	0	2	Pass1	PepFrag1	None	10375448	TFVVEVMGR	TFVVEVMGR	162	9	7.00	3165	6	6	2	1	81334990	70085		6372	6.0	b3b9y5y6y7y9	236429	972	118632535023639	78632535023639	0.2237	Green	8902	10375391	10375427	252125	70436	70436.00	1.92	2
1363	NCDO2118_RS07190	ATP-dependent 6-phosphofructokinase 1501063:1502085 reverse MW:35806	Regular	12536970	0.32	358627035	64	12	23	48.82	314881	268515	108338	0	3	Pass1	PepFrag1	None	10135738	DGIGGVAVGIR	DGIGGVAVGIR	277	11	7.00	3160	6	6	3	0	32429140	66091		6561	4.0	b2b6b8y5y6y7y8y11	214729	956	117327071037588	773270710375882	0.0604	Green	3670	10135763	10135798	213956	19013	19013.00	1.93	2
1363	NCDO2118_RS07190	ATP-dependent 6-phosphofructokinase 1501063:1502085 reverse MW:35806	Regular	12536970	0.32	358627035	64	12	23	48.82	314881	268515	108338	0	4	Pass1	PepFrag1	None	42181129	LTEHGFPAVGLPGTIDNDIVGTDFTIGFDTAVSTVVDALDK	LTEHGFPAVGLPGTIDNDIVGTDFTIGFDTAVSTVVDALDK	111	41	3.53	3163	5	5	1	0	4827775	57819	Missing	2215	3.6	b16y6y8y9y12y14y41	426710	3930	301084224596082	110542112298041	0.0118	Yellow	46375	42181230	42181193	510463	3705	3705.00	3.58	4
1363	NCDO2118_RS07190	ATP-dependent 6-phosphofructokinase 1501063:1502085 reverse MW:35806	Regular	12536970	0.32	358627035	64	12	23	48.82	314881	268515	108338	0	5	Pass1	PepFrag1	None	17138952	IAVLTSGGDAPGMNAAIR	IAVLTSGGDAPGMNAAIR	3	18	7.00	3161	5	5	1	0	13106390	62157	Identified	613	2.6	b3b4b6b6b13b13y8y10*	276474	1604	165664406959219	125664406959219	0.0110	Green	11003	17138956	17138974	264568	3466	3466.00	2.00	2
1363	NCDO2118_RS07190	ATP-dependent 6-phosphofructokinase 1501063:1502085 reverse MW:35806	Regular	12536970	0.32	358627035	64	12	23	48.82	314881	268515	108338	0	6	Pass1	PepFrag1	None	20209909	FGIEGVVVIGGDGSYHGAMR	FGIEGVVVIGGDGSYHGAMR	91	20	5.22	3164	2	2	0	0	4383388	57400		263	1.9	b11y2y13	307777	1857	182656123619213	817707490794755	0.0044	Yellow	22841	20209870	20209896	316700	1388	1388.00	3.00	3
1363	NCDO2118_RS07190	ATP-dependent 6-phosphofructokinase 1501063:1502085 reverse MW:35806	Regular	12536970	0.32	358627035	64	12	23	48.82	314881	268515	108338	0	7	Pass2	PepFrag2	None	21481335	YPEFAQVEGQLAGIEQLKK	YPEFAQVEGQLAGIEQLKK	72	19	4.56	3171	4	4	1	1	6430256	59064	Missing	1145	5.5	b11b11b19y5y8y9	325184	2012	192683688704514	152683688704514	0.0859	Green	22582	21480982	21480971	315670	27049	27049.00	2.25	2
1363	NCDO2118_RS07190	ATP-dependent 6-phosphofructokinase 1501063:1502085 reverse MW:35806	Regular	12536970	0.32	358627035	64	12	23	48.82	314881	268515	108338	0	8	Pass2	PepFrag2	None	7004352	AVELLR	AVELLR	271	6	7.00	3166	1	1	0	0	186487	43688		211	1.3	b4y1	172690	677	932149161649599	14642983232992	0.0050	Red	15218	7004380	7004406	284381	1578	1578.00	1.00	1
1363	NCDO2118_RS07190	ATP-dependent 6-phosphofructokinase 1501063:1502085 reverse MW:35806	Regular	12536970	0.32	358627035	64	12	23	48.82	314881	268515	108338	0	9	Pass2	PepFrag2	None	29044724	NEELVESPILGTAEEGALFSLTTEGGIK	NEELVESPILGTAEEGALFSLTTEGGIK	288	28	3.58	3167	5	5	0	1	1952948	53889	Missing	748	1.8	b2b5b18b20y1y8y10y14	473245	2710	235002506696719	775012533483597	0.0025	Yellow	38157	29045006	29045014	391740	797	797.00	4.00	4
1363	NCDO2118_RS07190	ATP-dependent 6-phosphofructokinase 1501063:1502085 reverse MW:35806	Regular	12536970	0.32	358627035	64	12	23	48.82	314881	268515	108338	0	10	Pass2	MissedCleavage	None	35938333	NEELVESPILGTAEEGALFSLTTEGGIKVNNPHK	NEELVESPILGTAEEGALFSLTTEGGIKVNNPHK	288	34	4.25	3169	3	3	1	0	3656351	56612	Identified	333	3.3	b6b7b11b14b29*	400061	3350	270680002746871	140453335164581	0.0113	Yellow	40133	35938352	35938225	415816	3572	3572.00	3.09	3
1363	NCDO2118_RS07190	ATP-dependent 6-phosphofructokinase 1501063:1502085 reverse MW:35806	Regular	12536970	0.32	358627035	64	12	23	48.82	314881	268515	108338	0	11	Pass2	MissedCleavage	None	16678388	FENVVNNINKGYEK	FENVVNNINKGYEK	197	14	14.00	3168	2	2	0	0	8085355	60059		387	2.0	y5y6y14	178777	1530	160529155651715	670194371011432	0.0073	Green	1548	16678260	16678298	183002	2290	2290.00	2.78	3
1363	NCDO2118_RS07190	ATP-dependent 6-phosphofructokinase 1501063:1502085 reverse MW:35806	Regular	12536970	0.32	358627035	64	12	23	48.82	314881	268515	108338	0	12	Pass2	VarMod	Phosphoryl STY(6)	13776674	IGRGGTFLYSAR	IGRGGTFLYSAR	60	12	11.14	3170	2	2	0	0	616920	48884		635	3.1	b7b12-H3PO4y9-H3PO4y12	153194	1197	136297869643399	962978696433986	0.0286	Red	32178	13776738	13776769	360362	9002	9002.00	1.88	2
1363	NCDO2118_RS07190	ATP-dependent 6-phosphofructokinase 1501063:1502085 reverse MW:35806	Regular	12536970	0.32	358627035	64	12	23	48.82	314881	268515	108338	0	13	Pass2	InSource	None	7584407	AGIEQLK	YPEFAQVEGQLAGIEQLK	83	7	7.00	3162	2	2	0	0	851662	0.0000		160	0.0	b4b7	371926	721	97211238753916	154422477507832	0.0049	Green	26625	7584416	7584441	333290	1555	1555.00	1.00	1
1363	NCDO2118_RS07190	ATP-dependent 6-phosphofructokinase 1501063:1502085 reverse MW:35806	Regular	2938003	0.7	358627035	23	7	23	24.12	63411	10459	5332	1	1	Pass1	PepFrag1	None	42181129	LTEHGFPAVGLPGTIDNDIVGTDFTIGFDTAVSTVVDALDK	LTEHGFPAVGLPGTIDNDIVGTDFTIGFDTAVSTVVDALDK	111	41	3.53	1899	8	8	3	0	19305310	57537	Identified	1284	4.3	b10b11b18b26*y6y8y9y10y12y30*	397203	3930	301084224596082	110542112298041	0.0999	Green	17639	42181333	42181333	509966	6336	6336.00	4.00	4
1363	NCDO2118_RS07190	ATP-dependent 6-phosphofructokinase 1501063:1502085 reverse MW:35806	Regular	2938003	0.7	358627035	23	7	23	24.12	63411	10459	5332	0	2	Pass1	PepFrag1	None	20200386	YPEFAQVEGQLAGIEQLK	YPEFAQVEGQLAGIEQLK	72	18	3.96	1898	5	5	2	0	7272146	53297	Missing	440	2.5	b7b8b10y3*y6y7y7*	317331	1877	183965258881789	826435059211928	0.0485	Yellow	15873	20200388	20200397	340940	3076	3076.00	2.54	3
1363	NCDO2118_RS07190	ATP-dependent 6-phosphofructokinase 1501063:1502085 reverse MW:35806	Regular	2938003	0.7	358627035	23	7	23	24.12	63411	10459	5332	0	3	Pass1	PepFrag1	Carbamidomethyl C(19)	22691129	NAGDIALNAGIAAGADDICIPEK	NAGDIALNAGIAAGADDICIPEK	171	23	3.50	1897	2	2	0	1	1899669	47467	Missing	206	1.8	b13y10	313508	2051	1951656614265	901104409510003	0.0165	Red	12821	22691070	22691070	265473	1047	1047.00	3.00	3
1363	NCDO2118_RS07190	ATP-dependent 6-phosphofructokinase 1501063:1502085 reverse MW:35806	Regular	2938003	0.7	358627035	23	7	23	24.12	63411	10459	5332	0	4	Pass2	PepFrag2	None	11996379	LNSALNNLNLN	LNSALNNLNLN	329	11	6.13	1903	3	3	1	0	796769	43694		338	1.6	b3b4y9	273990	1116	130077574610854	90077574610854	0.0242	Red	8096	11996026	11996052	208713	1536	1536.00	2.00	2
1363	NCDO2118_RS07190	ATP-dependent 6-phosphofructokinase 1501063:1502085 reverse MW:35806	Regular	2938003	0.7	358627035	23	7	23	24.12	63411	10459	5332	0	5	Pass2	PepFrag2	None	10135738	DGIGGVAVGIR	DGIGGVAVGIR	277	11	7.00	1900	1	1	0	0	2186147	48077		105	1.4	b9y5	220811	956	117327071037588	773270710375882	0.0164	Red	9816	10135621	10135648	226370	1041	1041.00	2.00	2
1363	NCDO2118_RS07190	ATP-dependent 6-phosphofructokinase 1501063:1502085 reverse MW:35806	Regular	2938003	0.7	358627035	23	7	23	24.12	63411	10459	5332	0	6	Pass2	VarMod	Phosphoryl STY(1)	11175111	TFVVEVMGR	TFVVEVMGR	162	9	7.00	1902	1	1	0	0	631170	42682		1741	5.2	b6y9	246143	972	118632535023639	78632535023639	0.7423	Red	7169	11175149	11175176	198872	47072	47072.00	1.94	2
1363	NCDO2118_RS07190	ATP-dependent 6-phosphofructokinase 1501063:1502085 reverse MW:35806	Regular	2938003	0.7	358627035	23	7	23	24.12	63411	10459	5332	0	7	Pass2	VarMod	Phosphoryl STY(*)	17938615	IAVLTSGGDAPGMNAAIR	IAVLTSGGDAPGMNAAIR	3	18	7.00	1901	3	3	1	0	2297875	48294	Missing	1218	2.5	y6y7y18y18*	268526	1604	165664406959219	125664406959219	0.0521	Red	8242	17938552	17938561	210315	3303	3303.00	2.00	2
1363	NCDO2118_RS07190	ATP-dependent 6-phosphofructokinase 1501063:1502085 reverse MW:35806	Regular	4379364	0.93	358627035	18	5	23	27.35	17814	12673	6548	1	1	Pass1	PepFrag1	None	10135738	DGIGGVAVGIR	DGIGGVAVGIR	277	11	7.00	445	10	10	6	3	71812010	64976		4091	2.9	b3b5b6b10y4y5y6y7y8y9y11	213605	956	117327071037588	773270710375882	0.4320	Green	4245	10135683	10135707	223857	7696	7696.00	1.85	2
1363	NCDO2118_RS07190	ATP-dependent 6-phosphofructokinase 1501063:1502085 reverse MW:35806	Regular	4379364	0.93	358627035	18	5	23	27.35	17814	12673	6548	0	2	Pass1	PepFrag1	Carbamidomethyl C(19)	22691129	NAGDIALNAGIAAGADDICIPEK	NAGDIALNAGIAAGADDICIPEK	171	23	3.50	446	0	0	0	0	1043125	46597	Missing	180	2.0	b4*y6	328038	2051	1951656614265	901104409510003	0.0717	Red	6366	22691198	22691194	279303	1278	1278.00	3.00	3
1363	NCDO2118_RS07190	ATP-dependent 6-phosphofructokinase 1501063:1502085 reverse MW:35806	Regular	4379364	0.93	358627035	18	5	23	27.35	17814	12673	6548	0	3	Pass2	PepFrag2	None	42181129	LTEHGFPAVGLPGTIDNDIVGTDFTIGFDTAVSTVVDALDK	LTEHGFPAVGLPGTIDNDIVGTDFTIGFDTAVSTVVDALDK	111	41	3.53	448	5	5	1	0	15643540	58357	Identified	496	3.6	b10b11y6y9y12	403546	3930	301084224596082	110542112298041	0.2076	Green	9795	42181532	42181532	510015	3699	3699.00	3.73	4
1363	NCDO2118_RS07190	ATP-dependent 6-phosphofructokinase 1501063:1502085 reverse MW:35806	Regular	4379364	0.93	358627035	18	5	23	27.35	17814	12673	6548	0	4	Pass2	PepFrag2	None	20200386	YPEFAQVEGQLAGIEQLK	YPEFAQVEGQLAGIEQLK	72	18	3.96	447	1	1	0	0	1870797	49134	Missing	61	1.9	y7*y11	330758	1877	183965258881789	826435059211928	0.0878	Yellow	8000	20200259	20200274	339080	1564	1564.00	2.57	3
1363	NCDO2118_RS07190	ATP-dependent 6-phosphofructokinase 1501063:1502085 reverse MW:35806	Regular	4379364	0.93	358627035	18	5	23	27.35	17814	12673	6548	0	5	Pass2	MissedCleavage	None	15948224	EFKFENVVNNINK	EFKFENVVNNINK	194	13	7.08	449	1	1	0	0	663605	44633		354	1.6	b4y4	264073	1476	156729424604522	644862830696813	0.0739	Red	5120	15948079	15948116	246192	1317	1317.00	3.00	3
1363	NCDO2118_RS07190	ATP-dependent 6-phosphofructokinase 1501063:1502085 reverse MW:35806	Regular	4379364	0.93	358627035	18	5	23	27.35	17814	12673	6548	0	6	Pass2	InSource	None	7284414	GGVAVGIR	DGIGGVAVGIR	280	8	11.05	445	1	1	0	0	2311070	0.0000		1366	0.0	y8	213605	693	946778652848494	149355730569699	0.1269	Green	4247	7284383	7284398	223870	2260	2260.00	1.00	1
1363	NCDO2118_RS07190	ATP-dependent 6-phosphofructokinase 1501063:1502085 reverse MW:35806	Regular	4495980	1	358627035	14	3	23	24.12	24754	24754	5346	1	1	Pass1	PepFrag1	Carbamidomethyl C(19)	22691129	NAGDIALNAGIAAGADDICIPEK	NAGDIALNAGIAAGADDICIPEK	171	23	3.50	446	1	1	0	0	415971	42719	Missing	1387	4.8	b13b23*y23y23*	326894	2051	1951656614265	901104409510003	0.6067	Red	7081	22691160	22691163	265024	15019	15019.00	2.96	3
1363	NCDO2118_RS07190	ATP-dependent 6-phosphofructokinase 1501063:1502085 reverse MW:35806	Regular	4495980	1	358627035	14	3	23	24.12	24754	24754	5346	0	2	Pass1	PepFrag1	None	42181129	LTEHGFPAVGLPGTIDNDIVGTDFTIGFDTAVSTVVDALDK	LTEHGFPAVGLPGTIDNDIVGTDFTIGFDTAVSTVVDALDK	111	41	3.53	445	9	9	3	0	34425530	61897	Identified	3037	4.6	b10b11y6y7y9y10y13y15y41	448376	3930	301084224596082	110542112298041	0.3055	Green	10882	42181071	42181071	510020	7562	7562.00	3.66	4
1363	NCDO2118_RS07190	ATP-dependent 6-phosphofructokinase 1501063:1502085 reverse MW:35806	Regular	4495980	1	358627035	14	3	23	24.12	24754	24754	5346	0	3	Pass1	PepFrag1	None	20200386	YPEFAQVEGQLAGIEQLK	YPEFAQVEGQLAGIEQLK	72	18	3.96	444	4	4	0	0	5978831	54294	Missing	922	2.2	b8y6y8y18	334839	1877	183965258881789	826435059211928	0.0878	Yellow	9269	20200400	20200418	340716	2173	2173.00	2.53	3
1363	NCDO2118_RS07190	ATP-dependent 6-phosphofructokinase 1501063:1502085 reverse MW:35806	Regular	3961320	1.51	358627035	22	5	23	25.88	27591	12966	8780	1	1	Pass1	PepFrag1	None	20200386	YPEFAQVEGQLAGIEQLK	YPEFAQVEGQLAGIEQLK	72	18	3.96	1185	12	12	5	3	50770980	63035	Missing	4936	3.6	b4b7b8b8*b10b10*b12b13b16y4y5y6y7y8y10y11y12y18	370324	1877	183965258881789	143965258881789	0.3200	Green	13934	20200344	20200337	336966	8828	8828.00	2.45	2
1363	NCDO2118_RS07190	ATP-dependent 6-phosphofructokinase 1501063:1502085 reverse MW:35806	Regular	3961320	1.51	358627035	22	5	23	25.88	27591	12966	8780	0	2	Pass1	PepFrag1	None	42181129	LTEHGFPAVGLPGTIDNDIVGTDFTIGFDTAVSTVVDALDK	LTEHGFPAVGLPGTIDNDIVGTDFTIGFDTAVSTVVDALDK	111	41	3.53	1186	4	4	1	0	5857657	53656	Identified	316	2.9	b11y9y10y13	417395	3930	301084224596082	110542112298041	0.0802	Yellow	27200	42180857	42180857	510548	2214	2214.00	3.60	4
1363	NCDO2118_RS07190	ATP-dependent 6-phosphofructokinase 1501063:1502085 reverse MW:35806	Regular	3961320	1.51	358627035	22	5	23	25.88	27591	12966	8780	0	3	Pass1	PepFrag1	None	10135738	DGIGGVAVGIR	DGIGGVAVGIR	277	11	7.00	1184	2	2	1	0	15735350	57947		500	1.7	y7y8	204350	956	117327071037588	773270710375882	0.0697	Green	2370	10135761	10135787	214759	1924	1924.00	2.00	2
1363	NCDO2118_RS07190	ATP-dependent 6-phosphofructokinase 1501063:1502085 reverse MW:35806	Regular	3961320	1.51	358627035	22	5	23	25.88	27591	12966	8780	0	4	Pass2	PepFrag2	None	10085949	VSVLGHIQR	VSVLGHIQR	244	9	11.05	1188	3	3	0	0	2190938	49385		2676	3.3	b2b9y6y9	157176	959	117572396964229	775723969642285	0.4821	Red	2140	10086122	10086147	210558	13301	13301.00	2.00	2
1363	NCDO2118_RS07190	ATP-dependent 6-phosphofructokinase 1501063:1502085 reverse MW:35806	Regular	3961320	1.51	358627035	22	5	23	25.88	27591	12966	8780	0	5	Pass2	VarMod	Phosphoryl STY(6)	20820379	AGLELYRLNSALNNLNLN	AGLELYRLNSALNNLNLN	322	18	7.00	1187	1	1	0	0	4188939	52199		352	1.8	b3b8b13y9*y12y13	395759	1877	183965258881789	143965258881789	0.0480	Yellow	24349	20820427	20820416	438975	1324	1324.00	2.55	2
1363	NCDO2118_RS07190	ATP-dependent 6-phosphofructokinase 1501063:1502085 reverse MW:35806	Regular	2331442	1.62	358627035	17	6	23	18.82	25791	28296	5207	1	1	Pass1	PepFrag1	Carbamidomethyl C(19)	22691129	NAGDIALNAGIAAGADDICIPEK	NAGDIALNAGIAAGADDICIPEK	171	23	3.50	1589	4	4	0	1	3086562	48571	Missing	1215	4.4	b13y8y10y23y23*	323817	2051	1951656614265	901104409510003	0.4685	Red	11395	22691025	22691016	265015	12082	12082.00	2.93	3
1363	NCDO2118_RS07190	ATP-dependent 6-phosphofructokinase 1501063:1502085 reverse MW:35806	Regular	2331442	1.62	358627035	17	6	23	18.82	25791	28296	5207	0	2	Pass1	PepFrag1	None	42181129	LTEHGFPAVGLPGTIDNDIVGTDFTIGFDTAVSTVVDALDK	LTEHGFPAVGLPGTIDNDIVGTDFTIGFDTAVSTVVDALDK	111	41	3.53	1587	7	7	2	0	15632720	55617	Identified	2144	4.4	b10b11y6y9y10y13y41	392916	3930	301084224596082	110542112298041	0.2630	Yellow	16110	42181413	42181413	510234	6782	6782.00	3.71	4
1363	NCDO2118_RS07190	ATP-dependent 6-phosphofructokinase 1501063:1502085 reverse MW:35806	Regular	2331442	1.62	358627035	17	6	23	18.82	25791	28296	5207	0	3	Pass2	PepFrag2	None	11906164	FENVVNNINK	FENVVNNINK	197	10	7.00	1590	1	1	0	0	731956	42321		944	1.9	b5*b7b10*y10	203859	1097	128596965077436	885969650774356	0.1121	Red	8425	11906054	11906076	224721	2891	2891.00	1.72	2
1363	NCDO2118_RS07190	ATP-dependent 6-phosphofructokinase 1501063:1502085 reverse MW:35806	Regular	2331442	1.62	358627035	17	6	23	18.82	25791	28296	5207	0	4	Pass2	PepFrag2	None	20200386	YPEFAQVEGQLAGIEQLK	YPEFAQVEGQLAGIEQLK	72	18	3.96	1588	4	4	0	0	2910853	48316	Missing	711	2.1	b10y7y11*y12y18	317732	1877	183965258881789	143965258881789	0.0793	Red	14417	20200230	20200224	340587	2046	2046.00	2.51	2
1363	NCDO2118_RS07190	ATP-dependent 6-phosphofructokinase 1501063:1502085 reverse MW:35806	Regular	2331442	1.62	358627035	17	6	23	18.82	25791	28296	5207	0	5	Pass2	PepFrag2	None	10135738	DGIGGVAVGIR	DGIGGVAVGIR	277	11	7.00	1592	1	1	0	0	1912986	46493		84	1.4	b6y5	231287	956	117327071037588	773270710375882	0.0416	Red	8593	10135469	10135493	226341	1073	1073.00	2.00	2
1363	NCDO2118_RS07190	ATP-dependent 6-phosphofructokinase 1501063:1502085 reverse MW:35806	Regular	2331442	1.62	358627035	17	6	23	18.82	25791	28296	5207	0	6	Pass2	MissedCleavage	None	10085109	EAGYKGDLR	EAGYKGDLR	235	9	6.95	1591	0	0	0	0	1031665	43812		109	1.2	b5y7	117010	911	113615753267925	736157532679247	0.0356	Red	1300	10085031	10085054	135994	917	917.00	2.00	2
1363	NCDO2118_RS07190	ATP-dependent 6-phosphofructokinase 1501063:1502085 reverse MW:35806	Regular	739868	3.51	358627035	12	6	23	3.24	50657	28842	6544	1	1	Pass1	PepFrag1	None	10135738	DGIGGVAVGIR	DGIGGVAVGIR	277	11	7.00	393	7	7	3	1	19462570	51584		3674	3.1	b3b5y3y5y6y7y8y11	224315	956	117327071037588	773270710375882	0.1898	Yellow	3486	10135676	10135713	224315	9614	9614.00	1.87	2
1363	NCDO2118_RS07190	ATP-dependent 6-phosphofructokinase 1501063:1502085 reverse MW:35806	Regular	739868	3.51	358627035	12	6	23	3.24	50657	28842	6544	0	2	Pass2	PepFrag2	None	20200386	YPEFAQVEGQLAGIEQLK	YPEFAQVEGQLAGIEQLK	72	18	3.96	394	1	1	0	0	451846	35241	Missing	1288	3.8	b7*y18	334162	1877	183965258881789	826435059211928	0.1948	Red	6201	20200177	20200209	334162	9868	9868.00	2.85	3
1363	NCDO2118_RS07190	ATP-dependent 6-phosphofructokinase 1501063:1502085 reverse MW:35806	Regular	739868	3.51	358627035	12	6	23	3.24	50657	28842	6544	0	3	Pass2	PepFrag2	None	21961118	NHHIIVLAEGVMTGEEFATK	NHHIIVLAEGVMTGEEFATK	213	20	5.23	397	1	1	0	0	573850	36280		36	2.1	y3	311101	2051	1951656614265	901104409510003	0.0357	Red	5820	21960426	21960446	311101	1808	1808.00	3.00	3
1363	NCDO2118_RS07190	ATP-dependent 6-phosphofructokinase 1501063:1502085 reverse MW:35806	Regular	739868	3.51	358627035	12	6	23	3.24	50657	28842	6544	0	4	Pass2	PepFrag2	None	8084563	LKEAGYK	LKEAGYK	233	7	9.63	398	0	0	0	0	270409	33012		73	1.4	b5	128623	759	100597568751794	161195137503589	0.0344	Red	969	8084306	8084324	128623	1743	1743.00	1.00	1
1363	NCDO2118_RS07190	ATP-dependent 6-phosphofructokinase 1501063:1502085 reverse MW:35806	Regular	739868	3.51	358627035	12	6	23	3.24	50657	28842	6544	0	5	Pass2	PepFrag2	Carbamidomethyl C(19)	22691129	NAGDIALNAGIAAGADDICIPEK	NAGDIALNAGIAAGADDICIPEK	171	23	3.50	395	0	0	0	0	694074	37106	Missing	58	1.7	y8	282867	2051	1951656614265	901104409510003	0.0164	Red	5223	22690918	22690933	282867	831	831.00	3.00	3
1363	NCDO2118_RS07190	ATP-dependent 6-phosphofructokinase 1501063:1502085 reverse MW:35806	Regular	739868	3.51	358627035	12	6	23	3.24	50657	28842	6544	0	6	Pass2	MissedCleavage	None	10085109	EAGYKGDLR	EAGYKGDLR	235	9	6.95	396	1	1	0	0	1818297	41288		116	4.1	b7	170781	911	113615753267925	736157532679247	0.4806	Red	1706	10085052	10085089	170781	24348	24348.00	2.00	2
1363	NCDO2118_RS07190	ATP-dependent 6-phosphofructokinase 1501063:1502085 reverse MW:35806	Regular	739868	3.51	358627035	12	6	23	3.24	50657	28842	6544	0	7	Pass2	InSource	None	7284414	GGVAVGIR	DGIGGVAVGIR	280	8	11.05	393	2	2	0	0	816213	0.0000		1299	0.0	b4y8	224328	693	946778652848494	149355730569699	0.0483	Yellow	3488	7284429	7284449	224328	2445	2445.00	1.00	1
1365	NCDO2118_RS07200	N-acetylglucosamine-6-phosphate deacetylase 1502471:1503619 reverse MW:41211	Regular	14770620	0	413827396	23	4	20	8.38	76053	108372	28153	1	1	Pass1	PepFrag1	Carbamidomethyl C(3)	16187643	AVCTVVGEHYQEAR	AVCTVVGEHYQEAR	104	14	5.30	1195	16	16	10	5	396923900	77681		25333	6.9	b2b3b4b4b5b5b6b9y2y3y4y5y6y8y9y11y11y12y12*y12y14	154098	1415	152380920983341	615872806555605	0.8899	Green	2519	16187661	16187694	158162	67683	67683.00	2.65	3
1365	NCDO2118_RS07200	N-acetylglucosamine-6-phosphate deacetylase 1502471:1503619 reverse MW:41211	Regular	14770620	0	413827396	23	4	20	8.38	76053	108372	28153	0	2	Pass1	PepFrag1	None	16748446	IGLAPERDGSEDFIR	IGLAPERDGSEDFIR	166	15	4.06	1197	3	3	0	0	5151405	58813	Missing	468	2.7	b6b15y8	260842	1529	160459200685454	120459200685454	0.0600	Green	12578	16748416	16748429	247372	4565	4565.00	2.00	2
1365	NCDO2118_RS07200	N-acetylglucosamine-6-phosphate deacetylase 1502471:1503619 reverse MW:41211	Regular	14770620	0	413827396	23	4	20	8.38	76053	108372	28153	0	3	Pass2	PepFrag2	None	7554410	IGLAPER	IGLAPER	166	7	7.00	1196	1	1	0	0	1167124	52365	Missing	640	1.1	y4y7	151474	710	962199661996764	152439932399353	0.0127	Yellow	4531	7554465	7554483	178119	966	966.00	1.00	1
1365	NCDO2118_RS07200	N-acetylglucosamine-6-phosphate deacetylase 1502471:1503619 reverse MW:41211	Regular	14770620	0	413827396	23	4	20	8.38	76053	108372	28153	0	4	Pass2	VarMod	Carbamidomethyl C(3);Phosphoryl STY(4)	19548841	AVCTVVGEHYQEARGAK	AVCTVVGEHYQEARGAK	104	17	7.16	1198	3	3	0	0	2614850	55868		1712	2.3	b3b8b11-H3PO4b17y17	145831	1665	169838362045012	129838362045012	0.0373	Yellow	9739	19548828	19548823	220712	2839	2839.00	2.00	2
1365	NCDO2118_RS07200	N-acetylglucosamine-6-phosphate deacetylase 1502471:1503619 reverse MW:41211	Regular	33939220	0	413827396	66	9	20	32.20	327477	164076	91610	1	1	Pass1	PepFrag1	None	15477417	GIFFEGPFFTEEK	GIFFEGPFFTEEK	123	13	3.96	1791	16	16	9	7	199427200	78305	Identified	37628	7.9	b2b3b4b5b6b6b8b11y2y2y3y3y5y7y8y8y9y9y10y11y11y13	384002	1405	151662141384316	111662141384316	0.3218	Green	39032	15477453	15477471	365947	105383	105383.00	1.97	2
1365	NCDO2118_RS07200	N-acetylglucosamine-6-phosphate deacetylase 1502471:1503619 reverse MW:41211	Regular	33939220	0	413827396	66	9	20	32.20	327477	164076	91610	0	2	Pass1	PepFrag1	None	19738884	MWELEDWQEAAHGMLK	MWELEDWQEAAHGMLK	149	16	4.16	1790	11	11	4	3	127134500	76350		10864	6.1	b2b3b5b6b6y4y5y8y9*y10y11*y13y14y15*y16	368924	1789	178169431628378	787796210855852	0.1245	Green	33278	19738872	19738895	340857	40761	40761.00	2.72	3
1365	NCDO2118_RS07200	N-acetylglucosamine-6-phosphate deacetylase 1502471:1503619 reverse MW:41211	Regular	33939220	0	413827396	66	9	20	32.20	327477	164076	91610	0	3	Pass1	PepFrag1	None	24002302	NVIDWGIATPAEAIMMASLTPAK	NVIDWGIATPAEAIMMASLTPAK	318	23	4.07	1792	19	19	9	5	357471100	80839	Identified	7159	5.1	b2b4b6b6b7b7*b8b9b9b13b13*b14y1y3y4y4y5y5y7y9y14y15y16y17y23y23*	462961	2265	208515545437082	168515545437082	0.0548	Green	50058	24002338	24002297	449829	17932	17932.00	2.39	2
1365	NCDO2118_RS07200	N-acetylglucosamine-6-phosphate deacetylase 1502471:1503619 reverse MW:41211	Regular	33939220	0	413827396	66	9	20	32.20	327477	164076	91610	0	4	Pass1	PepFrag1	None	14137155	GADHVVLITDSMR	GADHVVLITDSMR	263	13	5.10	1789	3	3	0	0	3447082	60682		621	1.7	b12y6y7y9y11	249801	1311	144819850668613	104819850668613	0.0049	Green	22958	14137129	14137152	298961	1602	1602.00	2.00	2
1365	NCDO2118_RS07200	N-acetylglucosamine-6-phosphate deacetylase 1502471:1503619 reverse MW:41211	Regular	33939220	0	413827396	66	9	20	32.20	327477	164076	91610	0	5	Pass2	PepFrag2	None	20659899	AAGLPDGPYMLGEYEVEVR	AAGLPDGPYMLGEYEVEVR	276	19	3.69	1795	3	3	0	0	2020509	58362	Missing	460	2.9	b10y1y4y6	343853	1888	184683300593056	144683300593056	0.0138	Yellow	22606	20659331	20659319	297727	4511	4511.00	2.00	2
1365	NCDO2118_RS07200	N-acetylglucosamine-6-phosphate deacetylase 1502471:1503619 reverse MW:41211	Regular	33939220	0	413827396	66	9	20	32.20	327477	164076	91610	0	6	Pass2	PepFrag2	None	15107213	ADQFFYAYETKK	ADQFFYAYETKK	6	12	6.89	1796	1	1	0	0	1382694	56714		77	1.6	y5	204773	1363	148624430928756	590829539525039	0.0046	Yellow	7540	15106763	15106808	233005	1498	1498.00	2.79	3
1365	NCDO2118_RS07200	N-acetylglucosamine-6-phosphate deacetylase 1502471:1503619 reverse MW:41211	Regular	33939220	0	413827396	66	9	20	32.20	327477	164076	91610	0	7	Pass2	PepFrag2	None	19380807	DGAAWLPTGRPAASILTLK	DGAAWLPTGRPAASILTLK	295	19	10.12	1797	2	2	0	0	865666	54681	Missing	353	1.7	b5b7y17y19	324823	1836	181276462984937	808509753232914	0.0033	Yellow	42203	19381376	19381402	381587	1067	1067.00	3.00	3
1365	NCDO2118_RS07200	N-acetylglucosamine-6-phosphate deacetylase 1502471:1503619 reverse MW:41211	Regular	33939220	0	413827396	66	9	20	32.20	327477	164076	91610	0	8	Pass2	MissedCleavage	None	8835360	KIGLAPER	KIGLAPER	165	8	10.12	1793	7	7	1	0	9186391	64938	Identified	34053	7.6	b1b4b7b8y3y5y8	258811	845	108059786919021	176119573838043	0.4681	Green	25577	8835250	8835273	309106	153285	153285.00	1.00	1
1365	NCDO2118_RS07200	N-acetylglucosamine-6-phosphate deacetylase 1502471:1503619 reverse MW:41211	Regular	33939220	0	413827396	66	9	20	32.20	327477	164076	91610	0	9	Pass2	VarMod	Phosphoryl STY(36)	40650191	AAGLPDGPYMLGEYEVEVRDGAAWLPTGRPAASILTLK	AAGLPDGPYMLGEYEVEVRDGAAWLPTGRPAASILTLK	276	38	4.28	1794	4	4	0	0	2633080	59512	Missing	395	2.4	b10b17y4y7	394959	3724	290468749963636	105234374981818	0.0044	Yellow	36511	40650184	40650105	354230	1438	1438.00	4.00	4
1365	NCDO2118_RS07200	N-acetylglucosamine-6-phosphate deacetylase 1502471:1503619 reverse MW:41211	Regular	8986782	0	413827396	17	4	20	2.09	86563	85629	14543	1	1	Pass1	PepFrag1	None	9384214	DGSEDFIR	DGSEDFIR	173	8	3.70	725	11	11	8	3	426044100	75831		11427	4.1	b2b3b3b4b5b5b8y1y2y3y4y4y5y5y6y7y7y8	170661	819	105831650371297	658316503712966	0.3297	Green	5294	9384221	9384240	179891	28543	28543.00	1.81	2
1365	NCDO2118_RS07200	N-acetylglucosamine-6-phosphate deacetylase 1502471:1503619 reverse MW:41211	Regular	8986782	0	413827396	17	4	20	2.09	86563	85629	14543	0	2	Pass2	PepFrag2	None	15477417	GIFFEGPFFTEEK	GIFFEGPFFTEEK	123	13	3.96	727	1	1	0	0	521663	46710	Missing	44	6.1	b5	398907	1405	151662141384316	111662141384316	0.5832	Red	8313	15477395	15477400	296614	50486	50486.00	2.00	2
1365	NCDO2118_RS07200	N-acetylglucosamine-6-phosphate deacetylase 1502471:1503619 reverse MW:41211	Regular	8986782	0	413827396	17	4	20	2.09	86563	85629	14543	0	3	Pass2	PepFrag2	None	8184117	MTYYIK	MTYYIK	0	6	9.52	728	3	3	0	0	555472	46983		1982	2.0	b5y2y6	172810	758	100509189593575	16101837918715	0.0583	Red	1632	8183920	8183933	119576	5050	5050.00	1.00	1
1365	NCDO2118_RS07200	N-acetylglucosamine-6-phosphate deacetylase 1502471:1503619 reverse MW:41211	Regular	8986782	0	413827396	17	4	20	2.09	86563	85629	14543	0	4	Pass2	PepFrag2	None	14137155	GADHVVLITDSMR	GADHVVLITDSMR	263	13	5.10	726	0	0	0	0	1114103	50005		32	1.4	y10	264294	1311	144819850668613	104819850668613	0.0099	Red	8029	14137383	14137392	285583	854	854.00	2.00	2
1365	NCDO2118_RS07200	N-acetylglucosamine-6-phosphate deacetylase 1502471:1503619 reverse MW:41211	Regular	8986782	0	413827396	17	4	20	2.09	86563	85629	14543	0	5	Pass2	InSource	None	7663730	SEDFIR	DGSEDFIR	175	6	4.07	725	2	2	0	0	7346814	0.0000		1058	0.0	y3y6	170661	680	934900895986338	146980179197268	0.0188	Green	5289	7663745	7663760	179834	1630	1630.00	1.00	1
1365	NCDO2118_RS07200	N-acetylglucosamine-6-phosphate deacetylase 1502471:1503619 reverse MW:41211	Regular	23160460	0	413827396	49	7	20	22.51	386504	116861	99214	1	1	Pass1	PepFrag1	None	15477417	GIFFEGPFFTEEK	GIFFEGPFFTEEK	123	13	3.96	2060	12	12	9	3	318875400	78684	Identified	26423	7.4	b3b4b5b9y2y3y4y5y7y8y9y10y11y11	383962	1405	151662141384316	111662141384316	0.2250	Green	33799	15477378	15477403	368617	86951	86951.00	2.00	2
1365	NCDO2118_RS07200	N-acetylglucosamine-6-phosphate deacetylase 1502471:1503619 reverse MW:41211	Regular	23160460	0	413827396	49	7	20	22.51	386504	116861	99214	0	2	Pass1	PepFrag1	None	19738884	MWELEDWQEAAHGMLK	MWELEDWQEAAHGMLK	149	16	4.16	2059	13	13	5	2	118860100	74398		7164	4.6	b2b3b6b12b16*y4y5y7y9y10*y11y12y13y15y16	369843	1789	178169431628378	787796210855852	0.0506	Green	28765	19738837	19738864	344125	19559	19559.00	2.80	3
1365	NCDO2118_RS07200	N-acetylglucosamine-6-phosphate deacetylase 1502471:1503619 reverse MW:41211	Regular	23160460	0	413827396	49	7	20	22.51	386504	116861	99214	0	3	Pass1	PepFrag1	None	24002302	NVIDWGIATPAEAIMMASLTPAK	NVIDWGIATPAEAIMMASLTPAK	318	23	4.07	2061	17	17	9	4	118690500	74392	Identified	3602	4.2	b2b5b6b7b8b9b13b14y3y4y5y7y14y15y16y18y23	461839	2265	208515545437082	168515545437082	0.0268	Green	43047	24002174	24002141	450745	10351	10351.00	2.46	2
1365	NCDO2118_RS07200	N-acetylglucosamine-6-phosphate deacetylase 1502471:1503619 reverse MW:41211	Regular	23160460	0	413827396	49	7	20	22.51	386504	116861	99214	0	4	Pass1	PepFrag1	None	19380807	DGAAWLPTGRPAASILTLK	DGAAWLPTGRPAASILTLK	295	19	10.12	2062	2	2	0	0	3698643	59328	Missing	628	1.6	b3b11b11y7	333715	1836	181276462984937	808509753232914	0.0023	Green	28463	19380750	19380779	342787	886	886.00	2.52	3
1365	NCDO2118_RS07200	N-acetylglucosamine-6-phosphate deacetylase 1502471:1503619 reverse MW:41211	Regular	23160460	0	413827396	49	7	20	22.51	386504	116861	99214	0	5	Pass2	MissedCleavage	None	8835360	KIGLAPER	KIGLAPER	165	8	10.12	2064	2	2	0	0	550564	51056	Missing	57202	8.0	b8y5y6y6y8	238002	845	108059786919021	176119573838043	0.6467	Red	20658	8835244	8835269	307769	249934	249934.00	1.00	1
1365	NCDO2118_RS07200	N-acetylglucosamine-6-phosphate deacetylase 1502471:1503619 reverse MW:41211	Regular	23160460	0	413827396	49	7	20	22.51	386504	116861	99214	0	6	Pass2	MissedCleavage	None	11646259	KGGFLEITDGK	KGGFLEITDGK	17	11	7.00	2063	2	2	0	0	2251071	57171		3579	3.9	y2y4y5y11	340795	1090	128049326774957	880493267749569	0.0448	Yellow	15029	11646182	11646216	283462	17319	17319.00	2.00	2
1365	NCDO2118_RS07200	N-acetylglucosamine-6-phosphate deacetylase 1502471:1503619 reverse MW:41211	Regular	23160460	0	413827396	49	7	20	22.51	386504	116861	99214	0	7	Pass2	VarMod	Phosphoryl STY(*)	24172952	DGAAWLPTGRPAASILTLKTAVK	DGAAWLPTGRPAASILTLKTAVK	295	23	10.59	2065	1	1	0	0	1061943	53908	Identified	616	2.1	b11y8y13	321865	2236	206731902016832	633659510084159	0.0039	Yellow	23593	24172967	24172984	319656	1504	1504.00	4.00	4
1365	NCDO2118_RS07200	N-acetylglucosamine-6-phosphate deacetylase 1502471:1503619 reverse MW:41211	Regular	4868589	0	413827396	13	3	20	4.97	20130	28572	4659	1	1	Pass1	PepFrag1	Carbamidomethyl C(3)	16187643	AVCTVVGEHYQEAR	AVCTVVGEHYQEAR	104	14	5.30	1431	10	10	7	2	129834300	68008		4524	4.3	b2b4y5y6y7y8y9y10y11y12y12	161472	1415	152380920983341	615872806555605	0.9026	Green	1788	16187610	16187633	159058	18170	18170.00	2.66	3
1365	NCDO2118_RS07200	N-acetylglucosamine-6-phosphate deacetylase 1502471:1503619 reverse MW:41211	Regular	4868589	0	413827396	13	3	20	4.97	20130	28572	4659	0	2	Pass1	PepFrag1	None	6873712	TYYIK	TYYIK	1	5	9.52	1432	2	2	0	0	5262283	54086		103	1.0	b3y5	126751	634	892248458087377	138449691617475	0.0436	Yellow	1241	6873674	6873694	146684	878	878.00	1.00	1
1365	NCDO2118_RS07200	N-acetylglucosamine-6-phosphate deacetylase 1502471:1503619 reverse MW:41211	Regular	4868589	0	413827396	13	3	20	4.97	20130	28572	4659	0	3	Pass2	PepFrag2	None	21019834	MWELEDWQEAAHGMLKK	MWELEDWQEAAHGMLKK	149	17	4.63	1433	1	1	0	0	929908	46558		32	1.6	b5	300059	1924	187023571388428	846823809256185	0.0538	Red	12290	21019671	21019675	294741	1082	1082.00	3.00	3
1365	NCDO2118_RS07200	N-acetylglucosamine-6-phosphate deacetylase 1502471:1503619 reverse MW:41211	Regular	6399953	0.24	413827396	30	5	20	14.40	318962	102772.5	81824	1	1	Pass1	PepFrag1	None	15477417	GIFFEGPFFTEEK	GIFFEGPFFTEEK	123	13	3.96	4383	14	14	8	4	154675100	69956	Identified	21065	6.6	b2b3b4b5b6b9b9b12b13y2y5y7y8y9y9y10y10y11y11	384920	1405	151662141384316	111662141384316	0.1985	Green	36224	15477459	15477469	369539	63298	63298.00	2.00	2
1365	NCDO2118_RS07200	N-acetylglucosamine-6-phosphate deacetylase 1502471:1503619 reverse MW:41211	Regular	6399953	0.24	413827396	30	5	20	14.40	318962	102772.5	81824	0	2	Pass1	PepFrag1	None	24002302	NVIDWGIATPAEAIMMASLTPAK	NVIDWGIATPAEAIMMASLTPAK	318	23	4.07	4384	7	7	1	2	18869820	60819	Identified	1470	3.3	b5b6b8*b9b11*b15*b20y3y5y7y9y14y19y23	470465	2265	208515545437082	168515545437082	0.0164	Green	46495	24002263	24002217	452168	5217	5217.00	2.52	2
1365	NCDO2118_RS07200	N-acetylglucosamine-6-phosphate deacetylase 1502471:1503619 reverse MW:41211	Regular	6399953	0.24	413827396	30	5	20	14.40	318962	102772.5	81824	0	3	Pass2	MissedCleavage	None	8835360	KIGLAPER	KIGLAPER	165	8	10.12	4385	1	1	0	0	1398713	49519	Identified	37631	7.7	y3y4y8	263920	845	108059786919021	176119573838043	0.5004	Red	22422	8835258	8835278	311229	159624	159624.00	1.00	1
1365	NCDO2118_RS07200	N-acetylglucosamine-6-phosphate deacetylase 1502471:1503619 reverse MW:41211	Regular	6399953	0.24	413827396	30	5	20	14.40	318962	102772.5	81824	0	4	Pass2	MissedCleavage	None	23373289	DGAAWLPTGRPAASILTLKTAVK	DGAAWLPTGRPAASILTLKTAVK	295	23	10.59	4386	1	1	0	0	1098371	48469	Missing	122	1.8	b8b19	337605	2236	206731902016832	166731902016832	0.0034	Red	27849	23373227	23373187	333158	1074	1074.00	2.00	2
1365	NCDO2118_RS07200	N-acetylglucosamine-6-phosphate deacetylase 1502471:1503619 reverse MW:41211	Regular	6399953	0.24	413827396	30	5	20	14.40	318962	102772.5	81824	0	5	Pass2	VarMod	Phosphoryl STY(8)	20180470	DGAAWLPTGRPAASILTLK	DGAAWLPTGRPAASILTLK	295	19	10.12	4387	7	7	0	1	13227500	59277	Identified	21536	8.6	b7b11b19y2y8y13y19y19-H3PO4	347163	1836	181276462984937	141276462984937	0.2814	Yellow	33791	20180499	20180484	357627	89749	89749.00	2.24	2
1365	NCDO2118_RS07200	N-acetylglucosamine-6-phosphate deacetylase 1502471:1503619 reverse MW:41211	Regular	6934975	0.3	413827396	25	7	20	16.75	65822	59619	15040	1	1	Pass1	PepFrag1	None	15477417	GIFFEGPFFTEEK	GIFFEGPFFTEEK	123	13	3.96	3082	12	12	7	3	151537100	70216	Identified	11096	5.9	b2b3b4b5b12y2y3y4y7y9y9y10y11y11	379867	1405	151662141384316	111662141384316	0.7189	Green	28415	15477456	15477471	371011	47317	47317.00	2.00	2
1365	NCDO2118_RS07200	N-acetylglucosamine-6-phosphate deacetylase 1502471:1503619 reverse MW:41211	Regular	6934975	0.3	413827396	25	7	20	16.75	65822	59619	15040	0	2	Pass1	PepFrag1	None	19738884	MWELEDWQEAAHGMLK	MWELEDWQEAAHGMLK	149	16	4.16	3081	7	7	2	1	28926250	63023		1396	3.5	b2b5b13b14y8y8y9y10y14y15*	362021	1789	178169431628378	787796210855852	0.1361	Green	24101	19738805	19738832	347329	8956	8956.00	2.72	3
1365	NCDO2118_RS07200	N-acetylglucosamine-6-phosphate deacetylase 1502471:1503619 reverse MW:41211	Regular	6934975	0.3	413827396	25	7	20	16.75	65822	59619	15040	0	3	Pass1	PepFrag1	None	24002302	NVIDWGIATPAEAIMMASLTPAK	NVIDWGIATPAEAIMMASLTPAK	318	23	4.07	3083	2	2	0	0	5778181	56028	Identified	760	2.8	b9b9b13*y7y11y23	463250	2265	208515545437082	168515545437082	0.0508	Yellow	36784	24002331	24002284	451983	3346	3346.00	2.45	2
1365	NCDO2118_RS07200	N-acetylglucosamine-6-phosphate deacetylase 1502471:1503619 reverse MW:41211	Regular	6934975	0.3	413827396	25	7	20	16.75	65822	59619	15040	0	4	Pass1	PepFrag1	None	13826263	ADQFFYAYETK	ADQFFYAYETK	6	11	4.07	3080	0	0	0	0	1200052	49202		40	1.3	b7	254242	1228	13864106273005	986410627300498	0.0133	Red	8050	13826159	13826180	264564	876	876.00	2.00	2
1365	NCDO2118_RS07200	N-acetylglucosamine-6-phosphate deacetylase 1502471:1503619 reverse MW:41211	Regular	6934975	0.3	413827396	25	7	20	16.75	65822	59619	15040	0	5	Pass2	PepFrag2	None	21019834	MWELEDWQEAAHGMLKK	MWELEDWQEAAHGMLKK	149	17	4.63	3086	1	1	0	0	4132867	54573		38	1.6	y11	314884	1924	187023571388428	846823809256185	0.0157	Yellow	18653	21020277	21020296	320450	1033	1033.00	2.40	3
1365	NCDO2118_RS07200	N-acetylglucosamine-6-phosphate deacetylase 1502471:1503619 reverse MW:41211	Regular	6934975	0.3	413827396	25	7	20	16.75	65822	59619	15040	0	6	Pass2	MissedCleavage	None	8835360	KIGLAPER	KIGLAPER	165	8	10.12	3084	3	3	0	0	2290257	52009	Identified	1364	1.5	b1y3y7y8	278282	845	108059786919021	176119573838043	0.0294	Red	6326	8835262	8835280	250603	1935	1935.00	1.00	1
1365	NCDO2118_RS07200	N-acetylglucosamine-6-phosphate deacetylase 1502471:1503619 reverse MW:41211	Regular	6934975	0.3	413827396	25	7	20	16.75	65822	59619	15040	0	7	Pass2	VarMod	Phosphoryl STY(8)	24172952	DGAAWLPTGRPAASILTLKTAVK	DGAAWLPTGRPAASILTLKTAVK	295	23	10.59	3085	0	0	0	0	837351	47640	Missing	346	2.4	y12b9-H3PO4	322239	2236	206731902016832	633659510084159	0.0358	Red	19439	24173081	24173099	323656	2359	2359.00	4.00	4
1365	NCDO2118_RS07200	N-acetylglucosamine-6-phosphate deacetylase 1502471:1503619 reverse MW:41211	Regular	8567420	0.5	413827396	29	8	20	16.23	208011	47968	69535	1	1	Pass1	PepFrag1	Carbamidomethyl C(3)	16187643	AVCTVVGEHYQEAR	AVCTVVGEHYQEAR	104	14	5.30	1420	11	11	4	2	189917600	72114		12290	5.6	b4b6y2y4y5y7y8y9y10y12y14y14*	154802	1415	152380920983341	615872806555605	0.1813	Green	2176	16187637	16187665	158482	37714	37714.00	2.66	3
1365	NCDO2118_RS07200	N-acetylglucosamine-6-phosphate deacetylase 1502471:1503619 reverse MW:41211	Regular	8567420	0.5	413827396	29	8	20	16.23	208011	47968	69535	0	2	Pass1	PepFrag1	None	16748446	IGLAPERDGSEDFIR	IGLAPERDGSEDFIR	166	15	4.06	1421	3	3	1	0	29817550	64073	Missing	2115	3.4	y4y12y14y14y15	258484	1529	160459200685454	120459200685454	0.0429	Green	10501	16748453	16748464	248075	8926	8926.00	2.00	2
1365	NCDO2118_RS07200	N-acetylglucosamine-6-phosphate deacetylase 1502471:1503619 reverse MW:41211	Regular	8567420	0.5	413827396	29	8	20	16.23	208011	47968	69535	0	3	Pass1	PepFrag1	None	6873712	TYYIK	TYYIK	1	5	9.52	1422	3	3	1	1	27380450	63703		226	1.1	b2b3y3	124737	634	892248458087377	138449691617475	0.0064	Green	1492	6873685	6873706	145974	1328	1328.00	1.00	1
1365	NCDO2118_RS07200	N-acetylglucosamine-6-phosphate deacetylase 1502471:1503619 reverse MW:41211	Regular	8567420	0.5	413827396	29	8	20	16.23	208011	47968	69535	0	4	Pass2	PepFrag2	None	7554410	IGLAPER	IGLAPER	166	7	7.00	1427	2	2	0	0	1328660	50563	Missing	51965	6.0	b2y6y7	144374	710	962199661996764	152439932399353	0.6922	Yellow	7054	7554274	7554295	211163	143976	143976.00	1.00	1
1365	NCDO2118_RS07200	N-acetylglucosamine-6-phosphate deacetylase 1502471:1503619 reverse MW:41211	Regular	8567420	0.5	413827396	29	8	20	16.23	208011	47968	69535	0	5	Pass2	PepFrag2	None	15477417	GIFFEGPFFTEEK	GIFFEGPFFTEEK	123	13	3.96	1426	2	2	0	0	1572456	51294	Identified	142	1.8	b9b9y7	373488	1405	151662141384316	111662141384316	0.0090	Yellow	15554	15477921	15477938	340723	1878	1878.00	2.00	2
1365	NCDO2118_RS07200	N-acetylglucosamine-6-phosphate deacetylase 1502471:1503619 reverse MW:41211	Regular	8567420	0.5	413827396	29	8	20	16.23	208011	47968	69535	0	6	Pass2	VarMod	Phosphoryl STY(*);Phosphoryl STY(*)	21059668	KATESGVVIALGHSNATYK	KATESGVVIALGHSNATYK	181	19	9.63	1425	2	2	0	0	942131	49070		788	4.0	b17y1y11y12y15	215733	1821	180287769086764	801918460578428	0.0515	Red	14247	21059615	21059623	304437	10705	10705.00	2.72	3
1365	NCDO2118_RS07200	N-acetylglucosamine-6-phosphate deacetylase 1502471:1503619 reverse MW:41211	Regular	8567420	0.5	413827396	29	8	20	16.23	208011	47968	69535	0	7	Pass2	VarMod	Carbamidomethyl C(3);Phosphoryl STY(*)	19548841	AVCTVVGEHYQEARGAK	AVCTVVGEHYQEARGAK	104	17	7.16	1424	4	4	0	0	1513024	51127		979	2.1	b3y1y3y17	145815	1665	169838362045012	129838362045012	0.0099	Yellow	8087	19548870	19548864	220904	2056	2056.00	2.00	2
1365	NCDO2118_RS07200	N-acetylglucosamine-6-phosphate deacetylase 1502471:1503619 reverse MW:41211	Regular	8567420	0.5	413827396	29	8	20	16.23	208011	47968	69535	0	8	Pass2	VarMod	Phosphoryl STY(16)	22619865	MTYYIKADQFFYAYETK	MTYYIKADQFFYAYETK	0	17	6.79	1423	2	2	0	0	4293457	55657		1030	1.8	b14y10-H3PO4y17	331407	1986	191020127365074	151020127365074	0.0069	Yellow	10523	22620032	22620001	248373	1428	1428.00	2.00	2
1365	NCDO2118_RS07200	N-acetylglucosamine-6-phosphate deacetylase 1502471:1503619 reverse MW:41211	Regular	1818261	1.49	413827396	16	8	20	6.81	213196	12241.5	81588	1	1	Pass1	PepFrag1	Carbamidomethyl C(3)	16187643	AVCTVVGEHYQEAR	AVCTVVGEHYQEAR	104	14	5.30	1756	5	5	2	0	40730130	58696		1407	3.1	y8y9y11y12y14	154481	1415	152380920983341	615872806555605	0.0346	Green	2573	16187602	16187620	160285	7373	7373.00	2.77	3
1365	NCDO2118_RS07200	N-acetylglucosamine-6-phosphate deacetylase 1502471:1503619 reverse MW:41211	Regular	1818261	1.49	413827396	16	8	20	6.81	213196	12241.5	81588	0	2	Pass1	PepFrag1	None	15107213	ADQFFYAYETKK	ADQFFYAYETKK	6	12	6.89	1757	1	1	0	0	2311225	46235		41	1.3	y5	227839	1363	148624430928756	108624430928756	0.0037	Red	8696	15107109	15107124	227173	788	788.00	2.00	2
1365	NCDO2118_RS07200	N-acetylglucosamine-6-phosphate deacetylase 1502471:1503619 reverse MW:41211	Regular	1818261	1.49	413827396	16	8	20	6.81	213196	12241.5	81588	0	3	Pass2	PepFrag2	None	7554410	IGLAPER	IGLAPER	166	7	7.00	1763	3	3	0	0	1152633	43213	Missing	62097	6.0	b2b6b7y6y7	147832	710	962199661996764	152439932399353	0.7223	Red	7165	7554294	7554311	211337	153994	153994.00	1.00	1
1365	NCDO2118_RS07200	N-acetylglucosamine-6-phosphate deacetylase 1502471:1503619 reverse MW:41211	Regular	1818261	1.49	413827396	16	8	20	6.81	213196	12241.5	81588	0	4	Pass2	PepFrag2	None	21019834	MWELEDWQEAAHGMLKK	MWELEDWQEAAHGMLKK	149	17	4.63	1758	3	3	0	0	3028588	47409		9721	4.2	b6b17y17	294473	1924	187023571388428	846823809256185	0.0669	Red	12984	21019621	21019621	296506	14264	14264.00	3.00	3
1365	NCDO2118_RS07200	N-acetylglucosamine-6-phosphate deacetylase 1502471:1503619 reverse MW:41211	Regular	1818261	1.49	413827396	16	8	20	6.81	213196	12241.5	81588	0	5	Pass2	PepFrag2	None	10665164	DGSEDFIRK	DGSEDFIRK	173	9	4.31	1762	0	0	0	0	1189225	43349		608	1.4	y5y6	155997	954	117163377846316	771633778463164	0.0063	Red	4108	10664876	10664900	178054	1351	1351.00	2.00	2
1365	NCDO2118_RS07200	N-acetylglucosamine-6-phosphate deacetylase 1502471:1503619 reverse MW:41211	Regular	1818261	1.49	413827396	16	8	20	6.81	213196	12241.5	81588	0	6	Pass2	PepFrag2	None	16748446	IGLAPERDGSEDFIR	IGLAPERDGSEDFIR	166	15	4.06	1759	0	0	0	0	1277221	43659	Missing	64	1.6	y6	263047	1529	160459200685454	120459200685454	0.0058	Red	12107	16748565	16748575	276858	1230	1230.00	2.00	2
1365	NCDO2118_RS07200	N-acetylglucosamine-6-phosphate deacetylase 1502471:1503619 reverse MW:41211	Regular	1818261	1.49	413827396	16	8	20	6.81	213196	12241.5	81588	0	7	Pass2	PepFrag2	None	14137155	GADHVVLITDSMR	GADHVVLITDSMR	263	13	5.10	1760	1	1	0	0	554099	40032		376	1.5	b6b7	239948	1311	144819850668613	104819850668613	0.0050	Red	3367	14137272	14137290	169071	1065	1065.00	2.00	2
1365	NCDO2118_RS07200	N-acetylglucosamine-6-phosphate deacetylase 1502471:1503619 reverse MW:41211	Regular	1818261	1.49	413827396	16	8	20	6.81	213196	12241.5	81588	0	8	Pass2	VarMod	Phosphoryl STY(9)	24801965	NVIDWGIATPAEAIMMASLTPAK	NVIDWGIATPAEAIMMASLTPAK	318	23	4.07	1761	3	3	0	0	1156122	43227	Missing	7274	6.4	b6b6b8b13-H3PO4b17*y23	397599	2265	208515545437082	168515545437082	0.1554	Red	13350	24802051	24802012	304255	33131	33131.00	2.46	2
1365	NCDO2118_RS07200	N-acetylglucosamine-6-phosphate deacetylase 1502471:1503619 reverse MW:41211	Regular	1398580	3.47	413827396	10	5	20	3.66	26496	58482	4153	1	1	Pass1	PepFrag1	Carbamidomethyl C(3)	16187643	AVCTVVGEHYQEAR	AVCTVVGEHYQEAR	104	14	5.30	3061	9	9	4	2	35593080	56971		2697	4.4	b3b5b7y3y5y7y8y9y10y11y12y12*	146086	1415	152380920983341	615872806555605	0.7357	Green	2730	16187585	16187601	159585	19494	19494.00	2.66	3
1365	NCDO2118_RS07200	N-acetylglucosamine-6-phosphate deacetylase 1502471:1503619 reverse MW:41211	Regular	1398580	3.47	413827396	10	5	20	3.66	26496	58482	4153	0	2	Pass2	PepFrag2	None	7554410	IGLAPER	IGLAPER	166	7	7.00	3063	0	0	0	0	1728130	43833	Identified	166	1.2	y2y3	147930	710	962199661996764	152439932399353	0.0396	Red	3625	7554558	7554571	169226	1049	1049.00	1.00	1
1365	NCDO2118_RS07200	N-acetylglucosamine-6-phosphate deacetylase 1502471:1503619 reverse MW:41211	Regular	1398580	3.47	413827396	10	5	20	3.66	26496	58482	4153	0	3	Pass2	PepFrag2	None	15107213	ADQFFYAYETKK	ADQFFYAYETKK	6	12	6.89	3064	0	0	0	0	1399413	42916		1103	1.4	b5b11*y8	226763	1363	148624430928756	108624430928756	0.0370	Red	6380	15107248	15107251	196708	980	980.00	2.00	2
1365	NCDO2118_RS07200	N-acetylglucosamine-6-phosphate deacetylase 1502471:1503619 reverse MW:41211	Regular	1398580	3.47	413827396	10	5	20	3.66	26496	58482	4153	0	4	Pass2	PepFrag2	None	8184117	MTYYIK	MTYYIK	0	6	9.52	3065	0	0	0	0	1177429	42166		38	1.1	y5	168052	758	100509189593575	16101837918715	0.0348	Red	7676	8184367	8184380	208209	923	923.00	1.33	1
1365	NCDO2118_RS07200	N-acetylglucosamine-6-phosphate deacetylase 1502471:1503619 reverse MW:41211	Regular	1398580	3.47	413827396	10	5	20	3.66	26496	58482	4153	0	5	Pass2	VarMod	Carbamidomethyl C(3);Phosphoryl STY(4)	16987306	AVCTVVGEHYQEAR	AVCTVVGEHYQEAR	104	14	5.30	3062	1	1	0	0	1397170	42909		149	2.5	y4y5*y9*y12-H3PO4	146086	1415	152380920983341	112380920983341	0.1529	Red	12876	16987447	16987438	256750	4050	4050.00	2.00	2
1365	NCDO2118_RS07200	N-acetylglucosamine-6-phosphate deacetylase 1502471:1503619 reverse MW:41211	Regular	1311094	3.74	413827396	18	7	20	10.21	143603	19981	45454	1	1	Pass1	PepFrag1	Carbamidomethyl C(3)	16187643	AVCTVVGEHYQEAR	AVCTVVGEHYQEAR	104	14	5.30	3049	7	7	2	1	31631430	56178		4218	4.2	b2b5y6y8y9y9y10y11y12y14	154026	1415	152380920983341	615872806555605	0.1161	Yellow	3650	16187522	16187555	159246	16675	16675.00	2.74	3
1365	NCDO2118_RS07200	N-acetylglucosamine-6-phosphate deacetylase 1502471:1503619 reverse MW:41211	Regular	1311094	3.74	413827396	18	7	20	10.21	143603	19981	45454	0	2	Pass1	PepFrag1	None	15107213	ADQFFYAYETKK	ADQFFYAYETKK	6	12	6.89	3050	0	0	0	0	1606349	43235		41	1.7	y10	222914	1363	148624430928756	108624430928756	0.0121	Red	12033	15107085	15107111	227379	1736	1736.00	2.00	2
1365	NCDO2118_RS07200	N-acetylglucosamine-6-phosphate deacetylase 1502471:1503619 reverse MW:41211	Regular	1311094	3.74	413827396	18	7	20	10.21	143603	19981	45454	0	3	Pass1	PepFrag1	None	14137155	GADHVVLITDSMR	GADHVVLITDSMR	263	13	5.10	3051	1	1	0	0	1876202	43909		37	1.7	b8	233190	1311	144819850668613	104819850668613	0.0109	Red	9102	14137036	14137064	203997	1570	1570.00	2.00	2
1365	NCDO2118_RS07200	N-acetylglucosamine-6-phosphate deacetylase 1502471:1503619 reverse MW:41211	Regular	1311094	3.74	413827396	18	7	20	10.21	143603	19981	45454	0	4	Pass2	PepFrag2	None	9384214	DGSEDFIR	DGSEDFIR	173	8	3.70	3055	2	2	0	0	1791399	43708		258	1.4	y3y8	189177	819	105831650371297	658316503712966	0.0098	Red	9878	9384323	9384355	209843	1406	1406.00	1.66	2
1365	NCDO2118_RS07200	N-acetylglucosamine-6-phosphate deacetylase 1502471:1503619 reverse MW:41211	Regular	1311094	3.74	413827396	18	7	20	10.21	143603	19981	45454	0	5	Pass2	MissedCleavage	None	21820202	MTYYIKADQFFYAYETK	MTYYIKADQFFYAYETK	0	17	6.79	3052	1	1	0	0	1338784	42443		123	1.5	b8y7	309128	1986	191020127365074	151020127365074	0.0056	Red	18201	21820032	21820027	311263	810	810.00	2.00	2
1365	NCDO2118_RS07200	N-acetylglucosamine-6-phosphate deacetylase 1502471:1503619 reverse MW:41211	Regular	1311094	3.74	413827396	18	7	20	10.21	143603	19981	45454	0	6	Pass2	VarMod	Oxidation M(4);Oxidation M(17)	23200373	DAKMWELEDWQEAAHGMLK	DAKMWELEDWQEAAHGMLK	146	19	4.28	3054	3	3	0	0	3273155	46326		39023	9.5	b7b9b19y11*y18*y19	324059	2082	197127304890847	157127304890847	0.8161	Red	10965	23200311	23200296	218917	117193	117193.00	2.00	2
1365	NCDO2118_RS07200	N-acetylglucosamine-6-phosphate deacetylase 1502471:1503619 reverse MW:41211	Regular	1311094	3.74	413827396	18	7	20	10.21	143603	19981	45454	0	7	Pass2	VarMod	Carbamidomethyl C(3);Phosphoryl STY(10)	19548841	AVCTVVGEHYQEARGAK	AVCTVVGEHYQEARGAK	104	17	7.16	3053	3	3	0	0	6063665	49004		1648	2.5	b17y12y14y17	142384	1665	169838362045012	129838362045012	0.0235	Red	11199	19548770	19548779	220715	3373	3373.00	2.00	2
1365	NCDO2118_RS07200	N-acetylglucosamine-6-phosphate deacetylase 1502471:1503619 reverse MW:41211	Regular	1311094	3.74	413827396	18	7	20	10.21	143603	19981	45454	0	8	Pass2	InSource	Oxidation M(3);Oxidation M(16)	21879838	AKMWELEDWQEAAHGMLK	DAKMWELEDWQEAAHGMLK	147	18	4.63	3054	1	1	0	0	466928	0.0000		106	0.0	b2	324059	1991	191340604142736	875604027618239	0.0058	Red	10954	21879792	21879809	218776	840	840.00	3.00	3
1366	NCDO2118_RS07205	tellurite resistance protein TelA 1503792:1504970 reverse MW:44310	Regular	5081201	0	443103053	19	7	32	7.40	29611	24673	5301	1	1	Pass1	PepFrag1	None	12175644	EAEQLDEQQK	EAEQLDEQQK	17	10	3.69	455	11	11	6	4	178418800	69574		2995	3.4	b2b3b4b5b7b10y2y3y4y5y5*y6y7y7*y8y8y10	108598	1086	127735864334797	877358643347971	0.4713	Green	1391	12175682	12175697	108610	13956	13956.00	2.00	2
1366	NCDO2118_RS07205	tellurite resistance protein TelA 1503792:1504970 reverse MW:44310	Regular	5081201	0	443103053	19	7	32	7.40	29611	24673	5301	0	2	Pass1	PepFrag1	None	6733879	IGAGIDK	IGAGIDK	145	7	6.78	458	2	2	1	0	19086630	59867		1621	2.6	y2y4y6y7	112758	637	895060906881961	139012181376392	0.3027	Yellow	1818	6733833	6733850	119370	8962	8962.00	1.11	1
1366	NCDO2118_RS07205	tellurite resistance protein TelA 1503792:1504970 reverse MW:44310	Regular	5081201	0	443103053	19	7	32	7.40	29611	24673	5301	0	3	Pass1	PepFrag1	None	12916124	ASTIEAATENER	ASTIEAATENER	319	12	3.96	456	1	1	0	0	3652268	52685		166	1.7	b3y6	141354	1155	133090673770468	930906737704675	0.0593	Red	2692	12916192	12916205	138905	1755	1755.00	2.00	2
1366	NCDO2118_RS07205	tellurite resistance protein TelA 1503792:1504970 reverse MW:44310	Regular	5081201	0	443103053	19	7	32	7.40	29611	24673	5301	0	4	Pass2	PepFrag2	None	5753399	SEIVK	SEIVK	27	5	7.00	457	1	1	0	0	3227157	52148		131	1.4	b3b3	87101	546	807646649952985	121529329990597	0.0778	Red	1550	5753323	5753342	112952	2304	2304.00	1.00	1
1366	NCDO2118_RS07205	tellurite resistance protein TelA 1503792:1504970 reverse MW:44310	Regular	5081201	0	443103053	19	7	32	7.40	29611	24673	5301	0	5	Pass2	PepFrag2	None	15317598	EAQDSTDNALIVQK	EAQDSTDNALIVQK	209	14	3.70	460	1	1	0	0	627757	45038		42	1.4	b12	211209	1403	151518181103703	111518181103703	0.0282	Red	6694	15317933	15317933	327708	836	836.00	2.00	2
1366	NCDO2118_RS07205	tellurite resistance protein TelA 1503792:1504970 reverse MW:44310	Regular	5081201	0	443103053	19	7	32	7.40	29611	24673	5301	0	6	Pass2	PepFrag2	None	12606794	IVSETTNDLLR	IVSETTNDLLR	301	11	4.07	461	1	1	0	0	480361	43875		32	1.2	y5	242605	1180	135004311721448	950043117214483	0.0260	Red	6311	12607023	12607037	302473	770	770.00	2.00	2
1366	NCDO2118_RS07205	tellurite resistance protein TelA 1503792:1504970 reverse MW:44310	Regular	5081201	0	443103053	19	7	32	7.40	29611	24673	5301	0	7	Pass2	VarMod	Phosphoryl STY(5);Phosphoryl STY(7)	13535851	ISAFSQSVLNK	ISAFSQSVLNK	78	11	10.10	459	2	2	0	0	1250222	48030		314	1.4	b3b6b9y7*y11	244105	1119	130310584226708	903105842267078	0.0347	Red	4156	13535827	13535837	173078	1028	1028.00	2.00	2
1366	NCDO2118_RS07205	tellurite resistance protein TelA 1503792:1504970 reverse MW:44310	Regular	22548340	0	443103053	79	16	32	54.08	305299	148344	113915	1	1	Pass1	PepFrag1	None	14848471	IQTSINTAIPLWK	IQTSINTAIPLWK	268	13	10.10	2127	8	8	2	0	58490910	71202	Identified	13184	6.4	b3b3b4b4b5*b6*b12*b13b13*y2y4y5y8*y11y11*y13	310250	1420	152739675565711	112739675565711	0.1901	Green	21007	14848415	14848428	305740	58036	58036.00	1.95	2
1366	NCDO2118_RS07205	tellurite resistance protein TelA 1503792:1504970 reverse MW:44310	Regular	22548340	0	443103053	79	16	32	54.08	305299	148344	113915	0	2	Pass1	PepFrag1	None	11936525	ISAFSQSVLNK	ISAFSQSVLNK	78	11	10.10	2125	15	15	10	4	374171300	79262		17473	5.7	b2b2b3b3b4b6*b9b11y1y2y3y5y6y6y7y8y9y10y10*y10y11	222457	1119	130310584226708	903105842267078	0.1615	Green	3072	11936489	11936510	205916	49296	49296.00	1.98	2
1366	NCDO2118_RS07205	tellurite resistance protein TelA 1503792:1504970 reverse MW:44310	Regular	22548340	0	443103053	79	16	32	54.08	305299	148344	113915	0	3	Pass1	PepFrag1	None	17899113	LTQQNLVDTIQETMR	LTQQNLVDTIQETMR	340	15	4.07	2128	14	14	9	2	186925300	76248		14293	5.9	b3b4b5*b6b6*b6b7*b12b15*y2y3y3y4y5y6y8y9y10y11y12y13y13*y15	269564	1666	169906358587853	129906358587853	0.1343	Green	21840	17899122	17899121	308800	41012	41012.00	2.16	2
1366	NCDO2118_RS07205	tellurite resistance protein TelA 1503792:1504970 reverse MW:44310	Regular	22548340	0	443103053	79	16	32	54.08	305299	148344	113915	0	4	Pass1	PepFrag1	None	11837409	NQVAIALTLLK	NQVAIALTLLK	281	11	10.10	2129	9	9	1	2	35768690	69066		4077	3.7	b2b2*b3b5*b6b9b9y2y4y7y9y11y11*	349417	1173	134469867085327	944698670853269	0.0520	Green	27706	11837364	11837386	332681	15885	15885.00	1.79	2
1366	NCDO2118_RS07205	tellurite resistance protein TelA 1503792:1504970 reverse MW:44310	Regular	22548340	0	443103053	79	16	32	54.08	305299	148344	113915	0	5	Pass1	PepFrag1	None	35727537	VQAQDLGEVGSSLTDLMFNLQQANPNELVAENK	VQAQDLGEVGSSLTDLMFNLQQANPNELVAENK	89	33	3.50	2130	7	7	0	0	12603960	64536	Missing	3028	4.7	b5b12*b16b20y4y6y6*y7y11y14y18y33	406819	3304	2681964304281	1387976202854	0.0323	Green	43126	35727709	35727579	418500	9862	9862.00	3.23	3
1366	NCDO2118_RS07205	tellurite resistance protein TelA 1503792:1504970 reverse MW:44310	Regular	22548340	0	443103053	79	16	32	54.08	305299	148344	113915	0	6	Pass1	PepFrag1	None	13186314	LYDENLNYFK	LYDENLNYFK	173	10	4.07	2126	2	2	1	0	17664880	66002		1054	2.8	b6y8y9	246494	1192	135918050833169	959180508331692	0.0269	Green	7659	13186340	13186358	242604	8221	8221.00	2.00	2
1366	NCDO2118_RS07205	tellurite resistance protein TelA 1503792:1504970 reverse MW:44310	Regular	22548340	0	443103053	79	16	32	54.08	305299	148344	113915	0	7	Pass1	PepFrag1	None	16598548	KEAQDSTDNALIVQK	KEAQDSTDNALIVQK	208	15	4.31	2131	6	6	1	1	4464559	60029		764	1.7	b5b14b15*y1y8y10*y12y13y15*	367897	1538	16108824788727	12108824788727	0.0047	Yellow	45575	16598545	16598551	442380	1428	1428.00	2.00	2
1366	NCDO2118_RS07205	tellurite resistance protein TelA 1503792:1504970 reverse MW:44310	Regular	22548340	0	443103053	79	16	32	54.08	305299	148344	113915	0	8	Pass2	PepFrag2	None	16399014	VQELDTEIIPQARK	VQELDTEIIPQARK	195	14	4.44	2133	7	7	0	0	3511645	58986	Identified	56364	7.5	b7b7*b10b12b14y1y5y13	216673	1547	161716069266701	678107128444674	0.2718	Yellow	10454	16398800	16398830	258944	82981	82981.00	3.00	3
1366	NCDO2118_RS07205	tellurite resistance protein TelA 1503792:1504970 reverse MW:44310	Regular	22548340	0	443103053	79	16	32	54.08	305299	148344	113915	0	9	Pass2	PepFrag2	None	12606794	IVSETTNDLLR	IVSETTNDLLR	301	11	4.07	2134	1	1	0	0	533732	50804		272	3.7	y4y7	233684	1180	135004311721448	950043117214483	0.0496	Red	23118	12606937	12606957	314128	15140	15140.00	2.00	2
1366	NCDO2118_RS07205	tellurite resistance protein TelA 1503792:1504970 reverse MW:44310	Regular	22548340	0	443103053	79	16	32	54.08	305299	148344	113915	0	10	Pass2	PepFrag2	None	16888953	ASLAAVEVLSTEELEK	ASLAAVEVLSTEELEK	36	16	3.79	2132	1	1	0	0	3173033	58546		93	2.3	y13	352877	1593	164906136923836	124906136923836	0.0099	Yellow	34350	16889120	16889124	360252	3014	3014.00	2.00	2
1366	NCDO2118_RS07205	tellurite resistance protein TelA 1503792:1504970 reverse MW:44310	Regular	22548340	0	443103053	79	16	32	54.08	305299	148344	113915	0	11	Pass2	MissedCleavage	None	19939495	NSEMLKASTIEAATENER	NSEMLKASTIEAATENER	313	18	4.26	2138	1	1	0	0	8014659	62570		581	3.2	b7b9*b10y9*y11	265316	1816	17995760182712	13995760182712	0.0215	Green	10970	19939513	19939500	261765	6555	6555.00	2.10	2
1366	NCDO2118_RS07205	tellurite resistance protein TelA 1503792:1504970 reverse MW:44310	Regular	22548340	0	443103053	79	16	32	54.08	305299	148344	113915	0	12	Pass2	MissedCleavage	None	20320669	DALTSQRIVSETTNDLLR	DALTSQRIVSETTNDLLR	294	18	4.31	2137	2	2	0	0	2737737	57905		993	3.0	b6b10b11b15y7y8y15y17*	295429	1890	184813703636431	144813703636431	0.0178	Yellow	13971	20320639	20320623	275102	5430	5430.00	2.00	2
1366	NCDO2118_RS07205	tellurite resistance protein TelA 1503792:1504970 reverse MW:44310	Regular	22548340	0	443103053	79	16	32	54.08	305299	148344	113915	0	13	Pass2	MissedCleavage	None	18880273	ASLAAVEVLSTEELEKAK	ASLAAVEVLSTEELEKAK	36	18	4.26	2136	3	3	0	0	3293954	58708		484	2.7	b5y4y7y14	315369	1795	178567575816541	138567575816541	0.0130	Yellow	25811	18880050	18880043	324669	3982	3982.00	2.00	2
1366	NCDO2118_RS07205	tellurite resistance protein TelA 1503792:1504970 reverse MW:44310	Regular	22548340	0	443103053	79	16	32	54.08	305299	148344	113915	0	14	Pass2	MissedCleavage	None	19749875	MDNPILDDLMTNDKVIK	MDNPILDDLMTNDKVIK	0	17	3.87	2135	0	0	0	0	5089075	60598	Identified	176	1.7	y8y14*y15*	341573	1858	182721691644367	142721691644367	0.0036	Green	36141	19749761	19749748	369093	1111	1111.00	2.00	2
1366	NCDO2118_RS07205	tellurite resistance protein TelA 1503792:1504970 reverse MW:44310	Regular	22548340	0	443103053	79	16	32	54.08	305299	148344	113915	0	15	Pass2	VarMod	Oxidation M(6)	11165718	SEIVKMHEK	SEIVKMHEK	27	9	7.82	2139	3	3	0	1	11728940	64224		338	1.6	b3b7y6	86934	1032	12346563632802	834656363280198	0.0061	Green	8757	11165772	11165794	248505	1868	1868.00	2.00	2
1366	NCDO2118_RS07205	tellurite resistance protein TelA 1503792:1504970 reverse MW:44310	Regular	22548340	0	443103053	79	16	32	54.08	305299	148344	113915	0	16	Pass2	VarMod	Phosphoryl STY(5)	13646933	LLQLSNNKQLN	LLQLSNNKQLN	381	11	10.10	2140	0	0	0	0	2113596	56781		741	1.6	b9*b11-H3PO4y8*y9-H3PO4	199900	1220	138038274311234	980382743112345	0.0048	Yellow	15620	13646890	13646907	282257	1478	1478.00	2.00	2
1366	NCDO2118_RS07205	tellurite resistance protein TelA 1503792:1504970 reverse MW:44310	Regular	3838589	0	443103053	29	6	32	8.42	44081	31358	14321	1	1	Pass1	PepFrag1	None	12175644	EAEQLDEQQK	EAEQLDEQQK	17	10	3.69	149	13	13	11	4	136355100	67188		7513	4.4	b2b2b3b3b4b4*b4b5b5y2y2*y3y3*y4y4*y4y5y5y6y6*y7y7*y8y8y9y10	108249	1086	127735864334797	877358643347971	0.6303	Green	1357	12175624	12175652	108249	27785	27785.00	1.97	2
1366	NCDO2118_RS07205	tellurite resistance protein TelA 1503792:1504970 reverse MW:44310	Regular	3838589	0	443103053	29	6	32	8.42	44081	31358	14321	0	2	Pass1	PepFrag1	None	12916124	ASTIEAATENER	ASTIEAATENER	319	12	3.96	150	4	4	2	1	6519981	53984		606	1.9	b3b5y6y7y8	138886	1155	133090673770468	930906737704675	0.0480	Yellow	2437	12916049	12916075	138886	2117	2117.00	2.00	2
1366	NCDO2118_RS07205	tellurite resistance protein TelA 1503792:1504970 reverse MW:44310	Regular	3838589	0	443103053	29	6	32	8.42	44081	31358	14321	0	3	Pass1	PepFrag1	None	5753399	SEIVK	SEIVK	27	5	7.00	151	3	3	0	1	8168721	54963		244	1.2	b3y2y5	117718	546	807646649952985	121529329990597	0.0330	Yellow	1715	5753360	5753378	117718	1456	1456.00	1.00	1
1366	NCDO2118_RS07205	tellurite resistance protein TelA 1503792:1504970 reverse MW:44310	Regular	3838589	0	443103053	29	6	32	8.42	44081	31358	14321	0	4	Pass1	PepFrag1	None	7783651	MEEEIK	MEEEIK	373	6	3.96	152	2	2	0	0	3682100	51503		352	1.2	b4y6	121842	710	962199661996764	152439932399353	0.0276	Yellow	1891	7783648	7783665	121842	1218	1218.00	1.00	1
1366	NCDO2118_RS07205	tellurite resistance protein TelA 1503792:1504970 reverse MW:44310	Regular	3838589	0	443103053	29	6	32	8.42	44081	31358	14321	0	5	Pass2	MissedCleavage	None	10926048	YQKIGAGIDK	YQKIGAGIDK	142	10	9.63	153	2	2	0	0	773912	44729		3006	2.4	b7y10	409366	1027	123066522796621	206133045593241	0.1144	Red	6261	10925934	10925942	409366	5042	5042.00	1.12	1
1366	NCDO2118_RS07205	tellurite resistance protein TelA 1503792:1504970 reverse MW:44310	Regular	3838589	0	443103053	29	6	32	8.42	44081	31358	14321	0	6	Pass2	VarMod	Phosphoryl STY(9)	11526024	IGAGIDKISAK	IGAGIDKISAK	145	11	9.88	154	5	5	0	1	2047817	48955		2600	2.7	b2b11y7y9y9y11y11-H3PO4	181934	1036	123784463240813	837844632408126	0.1466	Yellow	3609	11525982	11526011	181934	6463	6463.00	2.00	2
1366	NCDO2118_RS07205	tellurite resistance protein TelA 1503792:1504970 reverse MW:44310	Regular	5580890	0	443103053	34	11	32	26.28	258733	216980	62325	1	1	Pass1	PepFrag1	None	14007380	LIQNTNQELAEK	LIQNTNQELAEK	256	12	4.26	2132	12	12	9	3	139779000	68921		7527	4.7	b2b3b4b7b8y2y6y6*y7y8y9y9*y10y10*y10y11y12	172199	1305	144377652221186	104377652221186	0.1076	Green	1935	14007340	14007366	149631	27846	27846.00	2.00	2
1366	NCDO2118_RS07205	tellurite resistance protein TelA 1503792:1504970 reverse MW:44310	Regular	5580890	0	443103053	34	11	32	26.28	258733	216980	62325	0	2	Pass1	PepFrag1	None	5653344	GIFTK	GIFTK	122	5	10.10	2134	4	4	2	0	34446170	62838		828	1.9	b3y3y3y4y5	137300	535	796762383657417	119352476731483	0.0210	Green	2725	5653318	5653336	160299	5435	5435.00	1.00	1
1366	NCDO2118_RS07205	tellurite resistance protein TelA 1503792:1504970 reverse MW:44310	Regular	5580890	0	443103053	34	11	32	26.28	258733	216980	62325	0	3	Pass1	PepFrag1	None	15036995	DNPILDDLMTNDK	DNPILDDLMTNDK	1	13	3.43	2133	2	2	0	0	1191281	48227	Missing	475	1.8	b4b7b13y13	271790	1370	149132859655726	109132859655726	0.0067	Red	8021	15036908	15036930	207427	1727	1727.00	2.31	2
1366	NCDO2118_RS07205	tellurite resistance protein TelA 1503792:1504970 reverse MW:44310	Regular	5580890	0	443103053	34	11	32	26.28	258733	216980	62325	0	4	Pass2	PepFrag2	None	7213549	NSEMLK	NSEMLK	313	6	7.00	2136	6	6	2	1	16288680	59586		47631	4.0	b3b3b5b5*b6b6*y3y5y6y6*	128533	661	917403953113942	143480790622788	0.7100	Green	4746	7213477	7213496	179630	183699	183699.00	1.00	1
1366	NCDO2118_RS07205	tellurite resistance protein TelA 1503792:1504970 reverse MW:44310	Regular	5580890	0	443103053	34	11	32	26.28	258733	216980	62325	0	5	Pass2	PepFrag2	None	13186314	LYDENLNYFK	LYDENLNYFK	173	10	4.07	2142	1	1	0	0	1158051	48104		1874	4.7	b6y8*b9y4*y9	253750	1192	135918050833169	959180508331692	0.1236	Red	9465	13186094	13186122	219069	31982	31982.00	2.00	2
1366	NCDO2118_RS07205	tellurite resistance protein TelA 1503792:1504970 reverse MW:44310	Regular	5580890	0	443103053	34	11	32	26.28	258733	216980	62325	0	6	Pass2	PepFrag2	None	15317598	EAQDSTDNALIVQK	EAQDSTDNALIVQK	209	14	3.70	2140	2	2	0	0	10170650	57541		483	1.9	y3y14	194929	1403	151518181103703	111518181103703	0.0071	Green	8778	15317356	15317376	213106	1836	1836.00	2.00	2
1366	NCDO2118_RS07205	tellurite resistance protein TelA 1503792:1504970 reverse MW:44310	Regular	5580890	0	443103053	34	11	32	26.28	258733	216980	62325	0	7	Pass2	PepFrag2	None	9674731	VNDLESYK	VNDLESYK	223	8	4.07	2135	2	2	0	0	1724273	49833		894	1.2	y2y4y6y7y7	149062	874	110518230443205	70518230443205	0.0039	Yellow	4917	9674596	9674629	181383	997	997.00	2.00	2
1366	NCDO2118_RS07205	tellurite resistance protein TelA 1503792:1504970 reverse MW:44310	Regular	5580890	0	443103053	34	11	32	26.28	258733	216980	62325	0	8	Pass2	PepFrag2	None	35727537	VQAQDLGEVGSSLTDLMFNLQQANPNELVAENK	VQAQDLGEVGSSLTDLMFNLQQANPNELVAENK	89	33	3.50	2141	0	0	0	0	1731757	49852	Missing	627	2.0	y21*	345742	3304	2681964304281	1387976202854	0.0038	Yellow	19792	35726685	35726535	366010	990	990.00	3.00	3
1366	NCDO2118_RS07205	tellurite resistance protein TelA 1503792:1504970 reverse MW:44310	Regular	5580890	0	443103053	34	11	32	26.28	258733	216980	62325	0	9	Pass2	MissedCleavage	None	13707314	SIFEVTQKYQK	SIFEVTQKYQK	134	11	9.63	2137	1	1	0	0	1155477	48095		1190	1.5	y4*y11y11*	179647	1278	142379305459987	102379305459987	0.0053	Red	2980	13707244	13707270	163019	1366	1366.00	2.00	2
1366	NCDO2118_RS07205	tellurite resistance protein TelA 1503792:1504970 reverse MW:44310	Regular	5580890	0	443103053	34	11	32	26.28	258733	216980	62325	0	10	Pass2	MissedCleavage	None	19939495	NSEMLKASTIEAATENER	NSEMLKASTIEAATENER	313	18	4.26	2138	2	2	0	0	1720185	49823		218	1.5	b2b12y16*	226326	1816	17995760182712	799717345514136	0.0029	Yellow	9495	19939519	19939536	219254	763	763.00	3.00	3
1366	NCDO2118_RS07205	tellurite resistance protein TelA 1503792:1504970 reverse MW:44310	Regular	5580890	0	443103053	34	11	32	26.28	258733	216980	62325	0	11	Pass2	VarMod	Phosphoryl STY(5)	14807043	LIQNTNQELAEK	LIQNTNQELAEK	256	12	4.26	2139	1	1	0	0	4106781	53602		311	1.6	b10*y10-H3PO4y12	172199	1305	144377652221186	104377652221186	0.0051	Yellow	14059	14807090	14807112	261350	1331	1331.00	2.00	2
1366	NCDO2118_RS07205	tellurite resistance protein TelA 1503792:1504970 reverse MW:44310	Regular	5580890	0	443103053	34	11	32	26.28	258733	216980	62325	0	12	Pass2	InSource	None	8503941	NDLESYK	VNDLESYK	224	7	4.07	2135	1	1	0	0	201369	0.0000		267	0.0	b7	149062	769	101479237201927	162958474403854	0.0029	Yellow	4900	8503973	8503991	181179	761	761.00	1.00	1
1366	NCDO2118_RS07205	tellurite resistance protein TelA 1503792:1504970 reverse MW:44310	Regular	32362110	0	443103053	85	18	32	50.77	349305	232975	128560	1	1	Pass1	PepFrag1	None	11936525	ISAFSQSVLNK	ISAFSQSVLNK	78	11	10.10	1914	18	18	13	6	591623700	82821		50735	7.4	b2b2b3b3b4b4b5b7b8b9b11y1y2y3y3*y4y5y6y7y7*y7y8y9y9y10y10y11	214822	1119	130310584226708	903105842267078	0.2968	Green	3483	11936526	11936555	204400	103661	103661.00	1.97	2
1366	NCDO2118_RS07205	tellurite resistance protein TelA 1503792:1504970 reverse MW:44310	Regular	32362110	0	443103053	85	18	32	50.77	349305	232975	128560	0	2	Pass1	PepFrag1	None	17899113	LTQQNLVDTIQETMR	LTQQNLVDTIQETMR	340	15	4.07	1916	18	18	13	6	197027200	78046		29440	8.1	b3b4b5b5b6*b8b9b9*b11b12b13y3y4y5y6y6*y7y8y8y9y10y11y13y13y14y15	254141	1666	169906358587853	129906358587853	0.2794	Green	24870	17899179	17899186	306490	97593	97593.00	2.17	2
1366	NCDO2118_RS07205	tellurite resistance protein TelA 1503792:1504970 reverse MW:44310	Regular	32362110	0	443103053	85	18	32	50.77	349305	232975	128560	0	3	Pass1	PepFrag1	None	13186314	LYDENLNYFK	LYDENLNYFK	173	10	4.07	1915	8	8	4	2	95951570	74921		7019	4.7	b3b4b8y4y6y7y7y8y8*y9y9*	251026	1192	135918050833169	959180508331692	0.0908	Green	8850	13186299	13186325	240028	31721	31721.00	2.00	2
1366	NCDO2118_RS07205	tellurite resistance protein TelA 1503792:1504970 reverse MW:44310	Regular	32362110	0	443103053	85	18	32	50.77	349305	232975	128560	0	4	Pass1	PepFrag1	None	11837409	NQVAIALTLLK	NQVAIALTLLK	281	11	10.10	1917	11	11	5	3	128648500	76194		7979	4.6	b2b2*b3b3*b6b8b8b9b9b11*y3y6y7y8y9y11	335935	1173	134469867085327	944698670853269	0.0793	Green	30648	11837370	11837399	329746	27693	27693.00	1.81	2
1366	NCDO2118_RS07205	tellurite resistance protein TelA 1503792:1504970 reverse MW:44310	Regular	32362110	0	443103053	85	18	32	50.77	349305	232975	128560	0	5	Pass1	PepFrag1	None	35727537	VQAQDLGEVGSSLTDLMFNLQQANPNELVAENK	VQAQDLGEVGSSLTDLMFNLQQANPNELVAENK	89	33	3.50	1918	10	10	1	1	23253100	68765	Missing	5470	6.2	b8b9b10b11b13*b14b23b29b32*b33y4y6y10y12y15y28*y33	400196	3304	2681964304281	1387976202854	0.0609	Green	46703	35727728	35727551	417257	21289	21289.00	3.23	3
1366	NCDO2118_RS07205	tellurite resistance protein TelA 1503792:1504970 reverse MW:44310	Regular	32362110	0	443103053	85	18	32	50.77	349305	232975	128560	0	6	Pass2	PepFrag2	None	14848471	IQTSINTAIPLWK	IQTSINTAIPLWK	268	13	10.10	1931	0	0	0	0	913931	54710	Missing	37	3.0	b11	296851	1420	152739675565711	112739675565711	0.0216	Yellow	12237	14848670	14848691	257046	7549	7549.00	2.00	2
1366	NCDO2118_RS07205	tellurite resistance protein TelA 1503792:1504970 reverse MW:44310	Regular	32362110	0	443103053	85	18	32	50.77	349305	232975	128560	0	7	Pass2	PepFrag2	None	9674731	VNDLESYK	VNDLESYK	223	8	4.07	1928	3	3	1	0	2820785	59604		373	1.7	b6y7y8	139510	874	110518230443205	18103646088641	0.0066	Yellow	9190	9674866	9674888	241875	2321	2321.00	1.29	1
1366	NCDO2118_RS07205	tellurite resistance protein TelA 1503792:1504970 reverse MW:44310	Regular	32362110	0	443103053	85	18	32	50.77	349305	232975	128560	0	8	Pass2	PepFrag2	None	12617151	ALNVYIAGAELK	ALNVYIAGAELK	183	12	6.89	1930	2	2	0	0	1462561	56752		376	1.6	b10*y6y12	287501	1207	137055924746872	970559247468722	0.0043	Yellow	4298	12617420	12617447	211815	1512	1512.00	2.00	2
1366	NCDO2118_RS07205	tellurite resistance protein TelA 1503792:1504970 reverse MW:44310	Regular	32362110	0	443103053	85	18	32	50.77	349305	232975	128560	0	9	Pass2	PepFrag2	None	16598548	KEAQDSTDNALIVQK	KEAQDSTDNALIVQK	208	15	4.31	1929	1	1	0	0	1911844	57915		347	1.7	b12*y8*y12y14	369139	1538	16108824788727	12108824788727	0.0036	Yellow	41464	16599106	16599120	377370	1274	1274.00	2.00	2
1366	NCDO2118_RS07205	tellurite resistance protein TelA 1503792:1504970 reverse MW:44310	Regular	32362110	0	443103053	85	18	32	50.77	349305	232975	128560	0	10	Pass2	MissedCleavage	None	19939495	NSEMLKASTIEAATENER	NSEMLKASTIEAATENER	313	18	4.26	1922	1	1	0	0	3734452	60823		12074	4.6	b2*y6y18	261269	1816	17995760182712	13995760182712	0.0495	Green	12763	19939511	19939504	259628	17304	17304.00	2.08	2
1366	NCDO2118_RS07205	tellurite resistance protein TelA 1503792:1504970 reverse MW:44310	Regular	32362110	0	443103053	85	18	32	50.77	349305	232975	128560	0	11	Pass2	MissedCleavage	None	16359653	LARQLTIQQAPQIR	LARQLTIQQAPQIR	242	14	12.40	1921	3	3	1	0	1651905	57280	Missing	9895	4.2	b9*b13b14y7*y8*y14	168929	1565	162968072428466	122968072428466	0.0476	Yellow	6200	16359532	16359546	224273	16627	16627.00	2.00	2
1366	NCDO2118_RS07205	tellurite resistance protein TelA 1503792:1504970 reverse MW:44310	Regular	32362110	0	443103053	85	18	32	50.77	349305	232975	128560	0	12	Pass2	MissedCleavage	None	27545036	ALNVYIAGAELKVQELDTEIIPQAR	ALNVYIAGAELKVQELDTEIIPQAR	183	25	4.16	1919	1	1	0	0	884679	54568	Identified	948	2.4	b6*y4y14	394130	2619	229711797298957	113141198199305	0.0058	Yellow	32894	27544947	27544898	339308	2026	2026.00	3.00	3
1366	NCDO2118_RS07205	tellurite resistance protein TelA 1503792:1504970 reverse MW:44310	Regular	32362110	0	443103053	85	18	32	50.77	349305	232975	128560	0	13	Pass2	MissedCleavage	None	24802151	EAQDSTDNALIVQKVNDLESYK	EAQDSTDNALIVQKVNDLESYK	209	22	3.86	1920	2	2	0	0	3212362	60169		100	1.9	b22y4	289605	2277	209251375398959	995009169326396	0.0036	Green	7441	24802342	24802323	232091	1262	1262.00	3.00	3
1366	NCDO2118_RS07205	tellurite resistance protein TelA 1503792:1504970 reverse MW:44310	Regular	32362110	0	443103053	85	18	32	50.77	349305	232975	128560	0	14	Pass2	VarMod	Phosphoryl STY(5)	13416814	ALNVYIAGAELK	ALNVYIAGAELK	183	12	6.89	1923	2	2	0	0	2805010	59580		562	3.1	y5y10*y10y11	287501	1207	137055924746872	970559247468722	0.0255	Yellow	21042	13416716	13416742	291566	8924	8924.00	2.00	2
1366	NCDO2118_RS07205	tellurite resistance protein TelA 1503792:1504970 reverse MW:44310	Regular	32362110	0	443103053	85	18	32	50.77	349305	232975	128560	0	15	Pass2	VarMod	Phosphoryl STY(5)	13646933	LLQLSNNKQLN	LLQLSNNKQLN	381	11	10.10	1927	2	2	0	0	2997696	59868		993	1.7	b3b5b9y3*y5*	190756	1220	138038274311234	980382743112345	0.0056	Green	17435	13646892	13646917	277323	1963	1963.00	2.00	2
1366	NCDO2118_RS07205	tellurite resistance protein TelA 1503792:1504970 reverse MW:44310	Regular	32362110	0	443103053	85	18	32	50.77	349305	232975	128560	0	16	Pass2	VarMod	Phosphoryl STY(6)	17198677	VQELDTEIIPQARK	VQELDTEIIPQARK	195	14	4.44	1924	2	2	0	0	2188976	58503	Missing	118	1.7	b3y10	199391	1547	161716069266701	121716069266701	0.0040	Yellow	20630	17198796	17198807	289977	1411	1411.00	2.00	2
1366	NCDO2118_RS07205	tellurite resistance protein TelA 1503792:1504970 reverse MW:44310	Regular	32362110	0	443103053	85	18	32	50.77	349305	232975	128560	0	17	Pass2	VarMod	Phosphoryl STY(2)	25242225	LTQQNLVDTIQETMRIQAEGR	LTQQNLVDTIQETMRIQAEGR	340	21	4.44	1926	0	0	0	0	3007857	59883		514	1.7	b9b11b12b14-H3PO4y11*	260421	2276	209190105688904	994600704592691	0.0029	Green	29461	25242277	25242254	325053	1009	1009.00	3.00	3
1366	NCDO2118_RS07205	tellurite resistance protein TelA 1503792:1504970 reverse MW:44310	Regular	32362110	0	443103053	85	18	32	50.77	349305	232975	128560	0	18	Pass2	VarMod	Phosphoryl STY(7)	10675384	GLVDIETLK	GLVDIETLK	331	9	4.07	1925	0	0	0	0	845365	54371		198	1.2	b8-H3PO4y7-H3PO4y8	256112	953	117081488359117	770814883591171	0.0025	Yellow	31567	10675363	10675393	333300	874	874.00	2.00	2
1366	NCDO2118_RS07205	tellurite resistance protein TelA 1503792:1504970 reverse MW:44310	Regular	32362110	0	443103053	85	18	32	50.77	349305	232975	128560	0	19	Pass2	InSource	None	10805684	SAFSQSVLNK	ISAFSQSVLNK	79	10	10.10	1914	1	1	0	0	1985389	0.0000		1339	0.0	y10	214822	995	120496663418186	200993326836373	0.0057	Green	3488	10805701	10805720	204440	1991	1991.00	1.00	1
1366	NCDO2118_RS07205	tellurite resistance protein TelA 1503792:1504970 reverse MW:44310	Regular	32362110	0	443103053	85	18	32	50.77	349305	232975	128560	0	20	Pass2	InSource	None	6643083	QETMR	LTQQNLVDTIQETMR	350	5	7.00	1916	0	0	0	0	306126	0.0000		43	0.0	b3	254141	588	848550808472105	129710161694421	0.0037	Green	24892	6643083	6643106	306565	1301	1301.00	1.00	1
1366	NCDO2118_RS07205	tellurite resistance protein TelA 1503792:1504970 reverse MW:44310	Regular	13375290	0	443103053	38	10	32	14.54	111939	26187	29691	1	1	Pass1	PepFrag1	None	12916124	ASTIEAATENER	ASTIEAATENER	319	12	3.96	568	12	12	8	3	316206100	76263		6451	3.9	b3b3b4b4b5b5b12y3y4y5y6y7y7y8y8*y9y10y12	149491	1155	133090673770468	930906737704675	0.1470	Green	2947	12916121	12916135	142509	16457	16457.00	1.97	2
1366	NCDO2118_RS07205	tellurite resistance protein TelA 1503792:1504970 reverse MW:44310	Regular	13375290	0	443103053	38	10	32	14.54	111939	26187	29691	0	2	Pass1	PepFrag1	None	12175644	EAEQLDEQQK	EAEQLDEQQK	17	10	3.69	567	6	6	4	1	87240830	70670		1076	2.4	b2b3b4y4y5y6y7y7*y8	113183	1086	127735864334797	877358643347971	0.0476	Green	1262	12175595	12175610	112042	5325	5325.00	2.00	2
1366	NCDO2118_RS07205	tellurite resistance protein TelA 1503792:1504970 reverse MW:44310	Regular	13375290	0	443103053	38	10	32	14.54	111939	26187	29691	0	3	Pass1	PepFrag1	None	6733879	IGAGIDK	IGAGIDK	145	7	6.78	570	3	3	1	0	10414290	61439		1073	2.0	y1y6y7	130984	637	895060906881961	139012181376392	0.0394	Yellow	5262	6733881	6733900	179144	4405	4405.00	1.00	1
1366	NCDO2118_RS07205	tellurite resistance protein TelA 1503792:1504970 reverse MW:44310	Regular	13375290	0	443103053	38	10	32	14.54	111939	26187	29691	0	4	Pass1	PepFrag1	None	5753399	SEIVK	SEIVK	27	5	7.00	569	2	2	0	0	5613403	58755		313	1.3	b3y5	115865	546	807646649952985	121529329990597	0.0189	Yellow	1614	5753376	5753397	119296	2119	2119.00	1.00	1
1366	NCDO2118_RS07205	tellurite resistance protein TelA 1503792:1504970 reverse MW:44310	Regular	13375290	0	443103053	38	10	32	14.54	111939	26187	29691	0	5	Pass1	PepFrag1	None	13186314	LYDENLNYFK	LYDENLNYFK	173	10	4.07	571	2	2	0	0	1972816	54214		81	1.3	b6y6	263652	1192	135918050833169	959180508331692	0.0086	Red	7426	13186346	13186358	253521	963	963.00	2.00	2
1366	NCDO2118_RS07205	tellurite resistance protein TelA 1503792:1504970 reverse MW:44310	Regular	13375290	0	443103053	38	10	32	14.54	111939	26187	29691	0	6	Pass2	PepFrag2	None	7904054	DALTSQR	DALTSQR	294	7	7.00	576	2	2	0	0	633012	49277		11506	4.7	b5b6b7y7	85728	710	962199661996764	152439932399353	0.4047	Red	4235	7903944	7903958	163045	45302	45302.00	1.00	1
1366	NCDO2118_RS07205	tellurite resistance protein TelA 1503792:1504970 reverse MW:44310	Regular	13375290	0	443103053	38	10	32	14.54	111939	26187	29691	0	7	Pass2	PepFrag2	None	10175211	QQGEVELSK	QQGEVELSK	364	9	4.26	573	4	4	0	0	48330490	68105		1599	2.7	b3*b4*b6b9y3y5y7y7	127418	931	115272599814041	752725998140409	0.0744	Yellow	2369	10175005	10175024	133212	8327	8327.00	2.00	2
1366	NCDO2118_RS07205	tellurite resistance protein TelA 1503792:1504970 reverse MW:44310	Regular	13375290	0	443103053	38	10	32	14.54	111939	26187	29691	0	8	Pass2	PepFrag2	None	12606794	IVSETTNDLLR	IVSETTNDLLR	301	11	4.07	575	0	0	0	0	719034	49831		34	2.3	b7	262334	1180	135004311721448	950043117214483	0.0383	Red	8448	12607023	12607037	302740	4286	4286.00	2.00	2
1366	NCDO2118_RS07205	tellurite resistance protein TelA 1503792:1504970 reverse MW:44310	Regular	13375290	0	443103053	38	10	32	14.54	111939	26187	29691	0	9	Pass2	PepFrag2	None	10355027	MEEEIKEK	MEEEIKEK	373	8	4.26	574	1	1	0	0	1028006	51383		67	1.5	y6	80586	954	117163377846316	194326755692633	0.0146	Red	1787	10354684	10354680	122951	1631	1631.00	1.58	1
1366	NCDO2118_RS07205	tellurite resistance protein TelA 1503792:1504970 reverse MW:44310	Regular	13375290	0	443103053	38	10	32	14.54	111939	26187	29691	0	10	Pass2	VarMod	Oxidation M(6);Phosphoryl STY(1)	11965381	SEIVKMHEK	SEIVKMHEK	27	9	7.82	572	5	5	0	1	4567976	57860		7165	3.8	b4-H3PO4b5-H3PO4b6b8y3y7y9	124312	1032	12346563632802	834656363280198	0.1857	Yellow	4836	11965387	11965403	170672	20791	20791.00	1.69	2
1366	NCDO2118_RS07205	tellurite resistance protein TelA 1503792:1504970 reverse MW:44310	Regular	13375290	0	443103053	38	10	32	14.54	111939	26187	29691	0	11	Pass2	InSource	None	5603039	GAGIDK	IGAGIDK	146	6	6.78	570	1	1	0	0	513215	0.0000		326	0.0	y6	130984	513	774767172322126	114953434464425	0.0208	Yellow	5259	5603035	5603056	179119	2333	2333.00	1.00	1
1366	NCDO2118_RS07205	tellurite resistance protein TelA 1503792:1504970 reverse MW:44310	Regular	28247530	0	443103053	63	12	32	40.82	228243	152138	71627	1	1	Pass1	PepFrag1	None	17899113	LTQQNLVDTIQETMR	LTQQNLVDTIQETMR	340	15	4.07	1767	15	15	9	3	215628500	77847		22173	7.2	b3b3b4b5b5*b9b11y2y3y4y5y6y6*y7y8y8y9y10y11y12y12*y13y13y15	263840	1666	169906358587853	129906358587853	0.3054	Green	20776	17899119	17899133	308460	69701	69701.00	2.15	2
1366	NCDO2118_RS07205	tellurite resistance protein TelA 1503792:1504970 reverse MW:44310	Regular	28247530	0	443103053	63	12	32	40.82	228243	152138	71627	0	2	Pass1	PepFrag1	None	11936525	ISAFSQSVLNK	ISAFSQSVLNK	78	11	10.10	1765	13	13	10	3	426462100	80809		23632	6.2	b2b2b3b4b4b5b5y2y3y4y5y6y6y7y7*y8y8*y9y9*y9y10y10y11	221435	1119	130310584226708	903105842267078	0.2727	Green	2744	11936493	11936527	203501	62237	62237.00	1.98	2
1366	NCDO2118_RS07205	tellurite resistance protein TelA 1503792:1504970 reverse MW:44310	Regular	28247530	0	443103053	63	12	32	40.82	228243	152138	71627	0	3	Pass1	PepFrag1	None	11837409	NQVAIALTLLK	NQVAIALTLLK	281	11	10.10	1768	10	10	5	3	101663400	74581		6100	4.1	b2b2*b3b3*b4b6b9y4y6y7y8y9y11	338192	1173	134469867085327	944698670853269	0.0885	Green	26269	11837349	11837383	331486	20200	20200.00	1.79	2
1366	NCDO2118_RS07205	tellurite resistance protein TelA 1503792:1504970 reverse MW:44310	Regular	28247530	0	443103053	63	12	32	40.82	228243	152138	71627	0	4	Pass1	PepFrag1	None	13186314	LYDENLNYFK	LYDENLNYFK	173	10	4.07	1766	5	5	3	1	44692520	71012		3593	3.6	b3b9*y6y7y7y8y9	249678	1192	135918050833169	959180508331692	0.0692	Green	7209	13186328	13186360	241389	15787	15787.00	2.00	2
1366	NCDO2118_RS07205	tellurite resistance protein TelA 1503792:1504970 reverse MW:44310	Regular	28247530	0	443103053	63	12	32	40.82	228243	152138	71627	0	5	Pass1	PepFrag1	None	35727537	VQAQDLGEVGSSLTDLMFNLQQANPNELVAENK	VQAQDLGEVGSSLTDLMFNLQQANPNELVAENK	89	33	3.50	1769	9	9	2	0	46447260	71179	Identified	1499	5.2	b5b5*b9b9*b12b16y3y4y4*y5*y6y7y9y9y12*y12y16*y25	402185	3304	2681964304281	1387976202854	0.0584	Green	40292	35727664	35727539	417475	13322	13322.00	3.24	3
1366	NCDO2118_RS07205	tellurite resistance protein TelA 1503792:1504970 reverse MW:44310	Regular	28247530	0	443103053	63	12	32	40.82	228243	152138	71627	0	6	Pass2	PepFrag2	None	16598548	KEAQDSTDNALIVQK	KEAQDSTDNALIVQK	208	15	4.31	1770	1	1	0	0	1796367	57054		2260	4.8	b11*y15	349281	1538	16108824788727	12108824788727	0.0985	Yellow	29607	16598649	16598670	347621	22472	22472.00	2.00	2
1366	NCDO2118_RS07205	tellurite resistance protein TelA 1503792:1504970 reverse MW:44310	Regular	28247530	0	443103053	63	12	32	40.82	228243	152138	71627	0	7	Pass2	PepFrag2	None	12606794	IVSETTNDLLR	IVSETTNDLLR	301	11	4.07	1771	3	3	0	0	2054005	57636		2323	2.5	b2b7b9y7y9y10	228870	1180	135004311721448	950043117214483	0.0235	Yellow	30477	12606877	12606910	351691	5368	5368.00	2.00	2
1366	NCDO2118_RS07205	tellurite resistance protein TelA 1503792:1504970 reverse MW:44310	Regular	28247530	0	443103053	63	12	32	40.82	228243	152138	71627	0	8	Pass2	MissedCleavage	None	19939495	NSEMLKASTIEAATENER	NSEMLKASTIEAATENER	313	18	4.26	1774	1	1	0	0	3438920	59874		6584	3.7	b9*y7y10y18y18*	266548	1816	17995760182712	13995760182712	0.0412	Green	10285	19939497	19939498	260475	9399	9399.00	2.08	2
1366	NCDO2118_RS07205	tellurite resistance protein TelA 1503792:1504970 reverse MW:44310	Regular	28247530	0	443103053	63	12	32	40.82	228243	152138	71627	0	9	Pass2	MissedCleavage	None	16359653	LARQLTIQQAPQIR	LARQLTIQQAPQIR	242	14	12.40	1773	1	1	0	0	1146811	55105	Identified	3032	2.9	b10*y7*y10y14	175747	1565	162968072428466	122968072428466	0.0262	Yellow	5024	16359576	16359597	224841	5973	5973.00	2.00	2
1366	NCDO2118_RS07205	tellurite resistance protein TelA 1503792:1504970 reverse MW:44310	Regular	28247530	0	443103053	63	12	32	40.82	228243	152138	71627	0	10	Pass2	MissedCleavage	None	18880273	ASLAAVEVLSTEELEKAK	ASLAAVEVLSTEELEKAK	36	18	4.26	1772	1	1	0	0	680734	52840		32	1.6	y5	316483	1795	178567575816541	138567575816541	0.0040	Red	11346	18880369	18880377	266332	918	918.00	2.00	2
1366	NCDO2118_RS07205	tellurite resistance protein TelA 1503792:1504970 reverse MW:44310	Regular	28247530	0	443103053	63	12	32	40.82	228243	152138	71627	0	11	Pass2	VarMod	Phosphoryl STY(5)	13416814	ALNVYIAGAELK	ALNVYIAGAELK	183	12	6.89	1775	2	2	0	0	3176547	59529		322	1.4	y5y5y8y8	283388	1207	137055924746872	970559247468722	0.0043	Green	9678	13416732	13416764	256851	977	977.00	2.00	2
1366	NCDO2118_RS07205	tellurite resistance protein TelA 1503792:1504970 reverse MW:44310	Regular	28247530	0	443103053	63	12	32	40.82	228243	152138	71627	0	12	Pass2	VarMod	Phosphoryl STY(9)	12535885	RQQGEVELSK	RQQGEVELSK	363	10	7.11	1776	2	2	0	0	896713	54036		77	1.3	y4y6	46247	1079	127186377299843	871863772998428	0.0043	Yellow	4541	12535772	12535805	221396	972	972.00	2.00	2
1366	NCDO2118_RS07205	tellurite resistance protein TelA 1503792:1504970 reverse MW:44310	Regular	28247530	0	443103053	63	12	32	40.82	228243	152138	71627	0	13	Pass2	InSource	None	6643083	QETMR	LTQQNLVDTIQETMR	350	5	7.00	1767	0	0	0	0	301950	0.0000		0	0.0		263840	588	848550808472105	129710161694421	0.0040	Green	20782	6643050	6643075	308537	917	917.00	1.00	1
1366	NCDO2118_RS07205	tellurite resistance protein TelA 1503792:1504970 reverse MW:44310	Regular	3539918	0	443103053	16	4	32	7.40	26594	14634	5864	1	1	Pass1	PepFrag1	None	12175644	EAEQLDEQQK	EAEQLDEQQK	17	10	3.69	423	11	11	7	3	100260600	65501		2341	3.2	b2b2b3b4b5b5*y2y3y4y5y5*y6y7y7*y8y8*y10	149019	1086	127735864334797	877358643347971	0.4095	Green	1086	12175609	12175633	108081	10891	10891.00	2.00	2
1366	NCDO2118_RS07205	tellurite resistance protein TelA 1503792:1504970 reverse MW:44310	Regular	3539918	0	443103053	16	4	32	7.40	26594	14634	5864	0	2	Pass1	PepFrag1	None	6733879	IGAGIDK	IGAGIDK	145	7	6.78	425	2	2	0	0	34116000	60820		141	1.7	b7y6	99710	637	895060906881961	139012181376392	0.1063	Green	1391	6733842	6733865	118677	2827	2827.00	1.00	1
1366	NCDO2118_RS07205	tellurite resistance protein TelA 1503792:1504970 reverse MW:44310	Regular	3539918	0	443103053	16	4	32	7.40	26594	14634	5864	0	3	Pass1	PepFrag1	None	12916124	ASTIEAATENER	ASTIEAATENER	319	12	3.96	424	2	2	1	0	11912370	56250		347	1.4	y5y7y8	181381	1155	133090673770468	930906737704675	0.0344	Yellow	1962	12916116	12916138	138250	916	916.00	2.00	2
1366	NCDO2118_RS07205	tellurite resistance protein TelA 1503792:1504970 reverse MW:44310	Regular	3539918	0	443103053	16	4	32	7.40	26594	14634	5864	0	4	Pass2	PepFrag2	None	7904054	DALTSQR	DALTSQR	294	7	7.00	426	1	1	0	0	468817	42200		3035	2.9	b6*y7y7*	78992	710	962199661996764	152439932399353	0.4497	Red	2458	7903936	7903955	159216	11960	11960.00	1.00	1
1366	NCDO2118_RS07205	tellurite resistance protein TelA 1503792:1504970 reverse MW:44310	Regular	16595010	0	443103053	70	14	32	47.96	156195	112707	38686	1	1	Pass1	PepFrag1	None	14848471	IQTSINTAIPLWK	IQTSINTAIPLWK	268	13	10.10	1982	13	13	8	1	159597900	74230	Identified	9957	6.0	b2*b3b4b4*b5b6b12b13y2y4y5y6y7y7y10y11y11y12y12*y12y13	302712	1420	152739675565711	112739675565711	0.3095	Green	15621	14848425	14848442	307654	48349	48349.00	1.97	2
1366	NCDO2118_RS07205	tellurite resistance protein TelA 1503792:1504970 reverse MW:44310	Regular	16595010	0	443103053	70	14	32	47.96	156195	112707	38686	0	2	Pass1	PepFrag1	None	11936525	ISAFSQSVLNK	ISAFSQSVLNK	78	11	10.10	1980	11	11	8	1	130063400	73341		8652	4.9	b2b2b3b5b8b10y3y4y5y6y6y7y8y9y9y10y10y11	225266	1119	130310584226708	903105842267078	0.2156	Green	2085	11936460	11936485	204679	33678	33678.00	2.00	2
1366	NCDO2118_RS07205	tellurite resistance protein TelA 1503792:1504970 reverse MW:44310	Regular	16595010	0	443103053	70	14	32	47.96	156195	112707	38686	0	3	Pass1	PepFrag1	None	17899113	LTQQNLVDTIQETMR	LTQQNLVDTIQETMR	340	15	4.07	1983	9	9	3	1	56887830	69750		9758	5.3	b3b3b4b4b6*b8b9b9*b12*y4y5y7*y8y9y11y15	267319	1666	169906358587853	129906358587853	0.1964	Green	16126	17899124	17899127	310014	30680	30680.00	2.20	2
1366	NCDO2118_RS07205	tellurite resistance protein TelA 1503792:1504970 reverse MW:44310	Regular	16595010	0	443103053	70	14	32	47.96	156195	112707	38686	0	4	Pass1	PepFrag1	None	11837409	NQVAIALTLLK	NQVAIALTLLK	281	11	10.10	1985	7	7	3	2	56966830	69756		3710	3.5	b2b3*b5y6y7y8y9y10y11	346168	1173	134469867085327	944698670853269	0.0867	Green	21457	11837373	11837399	333366	13541	13541.00	1.78	2
1366	NCDO2118_RS07205	tellurite resistance protein TelA 1503792:1504970 reverse MW:44310	Regular	16595010	0	443103053	70	14	32	47.96	156195	112707	38686	0	5	Pass1	PepFrag1	None	13186314	LYDENLNYFK	LYDENLNYFK	173	10	4.07	1981	7	7	4	1	105435600	72430		2460	3.1	b3y3y4y6y7y8y9	244506	1192	135918050833169	959180508331692	0.0686	Green	5387	13186304	13186327	243266	10722	10722.00	2.00	2
1366	NCDO2118_RS07205	tellurite resistance protein TelA 1503792:1504970 reverse MW:44310	Regular	16595010	0	443103053	70	14	32	47.96	156195	112707	38686	0	6	Pass1	PepFrag1	None	35727537	VQAQDLGEVGSSLTDLMFNLQQANPNELVAENK	VQAQDLGEVGSSLTDLMFNLQQANPNELVAENK	89	33	3.50	1986	7	7	2	0	9637601	62039	Identified	1205	4.0	b7b9*b12b27*y3y5y8*y9y10y11y20y33*	404144	3304	2681964304281	1387976202854	0.0405	Green	34082	35727508	35727358	418566	6322	6322.00	3.34	3
1366	NCDO2118_RS07205	tellurite resistance protein TelA 1503792:1504970 reverse MW:44310	Regular	16595010	0	443103053	70	14	32	47.96	156195	112707	38686	0	7	Pass1	PepFrag1	None	12606794	IVSETTNDLLR	IVSETTNDLLR	301	11	4.07	1987	5	5	0	1	3611275	57776		586	2.1	b7b11y4y7y11	228583	1180	135004311721448	950043117214483	0.0222	Yellow	23899	12606719	12606743	346391	3471	3471.00	1.85	2
1366	NCDO2118_RS07205	tellurite resistance protein TelA 1503792:1504970 reverse MW:44310	Regular	16595010	0	443103053	70	14	32	47.96	156195	112707	38686	0	8	Pass1	PepFrag1	None	20019546	LNNEQQGLLQDNEMLDK	LNNEQQGLLQDNEMLDK	156	17	3.59	1984	2	2	1	0	2647620	56428		388	1.8	b10y10*y12y13	293266	1833	181078940254982	141078940254982	0.0085	Yellow	18313	20019633	20019621	318892	1334	1334.00	2.00	2
1366	NCDO2118_RS07205	tellurite resistance protein TelA 1503792:1504970 reverse MW:44310	Regular	16595010	0	443103053	70	14	32	47.96	156195	112707	38686	0	9	Pass2	PepFrag2	None	16598548	KEAQDSTDNALIVQK	KEAQDSTDNALIVQK	208	15	4.31	1992	1	1	0	0	2702778	56518		585	1.6	b3y12	379651	1538	16108824788727	12108824788727	0.0075	Yellow	30193	16599137	16599147	381120	1170	1170.00	2.00	2
1366	NCDO2118_RS07205	tellurite resistance protein TelA 1503792:1504970 reverse MW:44310	Regular	16595010	0	443103053	70	14	32	47.96	156195	112707	38686	0	10	Pass2	PepFrag2	None	15317598	EAQDSTDNALIVQK	EAQDSTDNALIVQK	209	14	3.70	1993	0	0	0	0	1582194	54192		79	1.5	y7*	214069	1403	151518181103703	111518181103703	0.0060	Yellow	3402	15317793	15317809	222170	944	944.00	2.00	2
1366	NCDO2118_RS07205	tellurite resistance protein TelA 1503792:1504970 reverse MW:44310	Regular	16595010	0	443103053	70	14	32	47.96	156195	112707	38686	0	11	Pass2	MissedCleavage	None	22141322	MHEKASLAAVEVLSTEELEK	MHEKASLAAVEVLSTEELEK	32	20	4.42	1988	4	4	0	0	3516596	57661		275	2.3	b11b13y3y6y6	331333	2079	196937895980103	156937895980103	0.0139	Yellow	27901	22141288	22141259	367736	2169	2169.00	2.15	2
1366	NCDO2118_RS07205	tellurite resistance protein TelA 1503792:1504970 reverse MW:44310	Regular	16595010	0	443103053	70	14	32	47.96	156195	112707	38686	0	12	Pass2	MissedCleavage	None	19939495	NSEMLKASTIEAATENER	NSEMLKASTIEAATENER	313	18	4.26	1990	0	0	0	0	2755311	56601		60	2.1	y9	258937	1816	17995760182712	13995760182712	0.0127	Yellow	7788	19939441	19939430	262548	1982	1982.00	2.00	2
1366	NCDO2118_RS07205	tellurite resistance protein TelA 1503792:1504970 reverse MW:44310	Regular	16595010	0	443103053	70	14	32	47.96	156195	112707	38686	0	13	Pass2	MissedCleavage	None	16359653	LARQLTIQQAPQIR	LARQLTIQQAPQIR	242	14	12.40	1989	2	2	0	0	4772029	58987	Identified	702	1.4	b10*y6y8*y14	189024	1565	162968072428466	122968072428466	0.0053	Green	5005	16359609	16359620	239266	822	822.00	2.00	2
1366	NCDO2118_RS07205	tellurite resistance protein TelA 1503792:1504970 reverse MW:44310	Regular	16595010	0	443103053	70	14	32	47.96	156195	112707	38686	0	14	Pass2	VarMod	Phosphoryl STY(8)	15198607	NQVAIALTLLKQK	NQVAIALTLLKQK	281	13	10.60	1991	2	2	0	0	885006	51669		269	1.5	b4b8-H3PO4b10	288984	1422	152883059456422	619220396376148	0.0065	Red	24508	15198595	15198640	349628	1011	1011.00	3.00	3
1366	NCDO2118_RS07205	tellurite resistance protein TelA 1503792:1504970 reverse MW:44310	Regular	7479592	0.91	443103053	33	10	32	21.17	53275	18052	8850	1	1	Pass1	PepFrag1	None	14007380	LIQNTNQELAEK	LIQNTNQELAEK	256	12	4.26	1521	14	14	10	4	209646300	71954		4128	3.8	b2b3b5b6b7*y2y3y5y6y7y8y9y9y10y10*y10y11y12	179129	1305	144377652221186	104377652221186	0.2828	Green	1635	14007355	14007377	149661	15068	15068.00	2.00	2
1366	NCDO2118_RS07205	tellurite resistance protein TelA 1503792:1504970 reverse MW:44310	Regular	7479592	0.91	443103053	33	10	32	21.17	53275	18052	8850	0	2	Pass1	PepFrag1	None	5653344	GIFTK	GIFTK	122	5	10.10	1523	2	2	0	0	15672030	60690		238	1.4	y3y5	134884	535	796762383657417	119352476731483	0.0408	Green	2368	5653320	5653341	161210	2175	2175.00	1.00	1
1366	NCDO2118_RS07205	tellurite resistance protein TelA 1503792:1504970 reverse MW:44310	Regular	7479592	0.91	443103053	33	10	32	21.17	53275	18052	8850	0	3	Pass1	PepFrag1	None	15317598	EAQDSTDNALIVQK	EAQDSTDNALIVQK	209	14	3.70	1524	2	2	0	0	5588415	56212		217	1.4	y11y14	195714	1403	151518181103703	111518181103703	0.0152	Green	7332	15317479	15317496	213729	809	809.00	2.00	2
1366	NCDO2118_RS07205	tellurite resistance protein TelA 1503792:1504970 reverse MW:44310	Regular	7479592	0.91	443103053	33	10	32	21.17	53275	18052	8850	0	4	Pass1	PepFrag1	None	20019546	LNNEQQGLLQDNEMLDK	LNNEQQGLLQDNEMLDK	156	17	3.59	1522	2	2	0	0	14829500	60450		207	1.5	y8y17	265478	1833	181078940254982	141078940254982	0.0150	Green	11231	20019550	20019541	256961	800	800.00	2.00	2
1366	NCDO2118_RS07205	tellurite resistance protein TelA 1503792:1504970 reverse MW:44310	Regular	7479592	0.91	443103053	33	10	32	21.17	53275	18052	8850	0	5	Pass2	PepFrag2	None	17899113	LTQQNLVDTIQETMR	LTQQNLVDTIQETMR	340	15	4.07	1530	1	1	0	0	503052	45755		68	1.8	b6y7*	244285	1666	169906358587853	129906358587853	0.0278	Red	4295	17898671	17898676	183611	1483	1483.00	2.00	2
1366	NCDO2118_RS07205	tellurite resistance protein TelA 1503792:1504970 reverse MW:44310	Regular	7479592	0.91	443103053	33	10	32	21.17	53275	18052	8850	0	6	Pass2	MissedCleavage	None	17768684	QQGEVELSKMEEEIK	QQGEVELSKMEEEIK	364	15	4.08	1526	2	2	0	0	1086370	49099		670	3.2	y2y8y15	220679	1641	168202335443028	128202335443028	0.1453	Red	13147	17768822	17768827	284506	7739	7739.00	2.00	2
1366	NCDO2118_RS07205	tellurite resistance protein TelA 1503792:1504970 reverse MW:44310	Regular	7479592	0.91	443103053	33	10	32	21.17	53275	18052	8850	0	7	Pass2	MissedCleavage	None	10926048	YQKIGAGIDK	YQKIGAGIDK	142	10	9.63	1525	2	2	1	0	2290076	52337		244	1.5	y5y6y7	144121	1027	123066522796621	830665227966207	0.0277	Yellow	4135	10926000	10926028	181865	1475	1475.00	2.00	2
1366	NCDO2118_RS07205	tellurite resistance protein TelA 1503792:1504970 reverse MW:44310	Regular	7479592	0.91	443103053	33	10	32	21.17	53275	18052	8850	0	8	Pass2	VarMod	Phosphoryl STY(*)	13406457	IVSETTNDLLR	IVSETTNDLLR	301	11	4.07	1527	1	1	0	0	348445	44160		185	3.5	b7-H3PO4b10*b11	225310	1180	135004311721448	950043117214483	0.2560	Red	9920	13406480	13406504	240505	13637	13637.00	2.00	2
1366	NCDO2118_RS07205	tellurite resistance protein TelA 1503792:1504970 reverse MW:44310	Regular	7479592	0.91	443103053	33	10	32	21.17	53275	18052	8850	0	9	Pass2	VarMod	Phosphoryl STY(2);Phosphoryl STY(9)	26041888	LTQQNLVDTIQETMRIQAEGR	LTQQNLVDTIQETMRIQAEGR	340	21	4.44	1529	5	5	0	0	8240132	57898		2767	3.7	b6b8b8*b16b21y5*y9*y10y21	261819	2276	209190105688904	994600704592691	0.1560	Green	6892	26041959	26041932	209446	8312	8312.00	3.00	3
1366	NCDO2118_RS07205	tellurite resistance protein TelA 1503792:1504970 reverse MW:44310	Regular	7479592	0.91	443103053	33	10	32	21.17	53275	18052	8850	0	10	Pass2	VarMod	Oxidation M(6)	10445547	GIFTKMFGK	GIFTKMFGK	122	9	10.60	1528	2	2	1	0	2118525	51999		126	1.6	y4y5	227965	977	119039020135367	79039020135367	0.0334	Yellow	2459	10445515	10445544	162295	1777	1777.00	2.00	2
1366	NCDO2118_RS07205	tellurite resistance protein TelA 1503792:1504970 reverse MW:44310	Regular	1358031	1.37	443103053	19	8	32	7.91	110998	99548	25017	1	1	Pass1	PepFrag1	None	7213549	NSEMLK	NSEMLK	313	6	7.00	2251	4	4	0	1	6940361	49743		20676	4.0	b3b3b5*b5b6y3y6y6*	122402	661	917403953113942	143480790622788	0.8138	Yellow	3338	7213507	7213526	181312	90329	90329.00	1.00	1
1366	NCDO2118_RS07205	tellurite resistance protein TelA 1503792:1504970 reverse MW:44310	Regular	1358031	1.37	443103053	19	8	32	7.91	110998	99548	25017	0	2	Pass1	PepFrag1	None	14007380	LIQNTNQELAEK	LIQNTNQELAEK	256	12	4.26	2249	9	9	4	2	37861810	57111		2016	3.0	b2b3y3y5y6y8y9y9*y10y10*y10y12	179159	1305	144377652221186	104377652221186	0.0735	Green	1360	14007329	14007350	150006	8156	8156.00	2.00	2
1366	NCDO2118_RS07205	tellurite resistance protein TelA 1503792:1504970 reverse MW:44310	Regular	1358031	1.37	443103053	19	8	32	7.91	110998	99548	25017	0	3	Pass1	PepFrag1	None	15036995	DNPILDDLMTNDK	DNPILDDLMTNDK	1	13	3.43	2250	1	1	0	0	2157024	44668	Missing	127	1.5	b8*y9	270085	1370	149132859655726	109132859655726	0.0096	Red	7106	15036983	15036999	223311	1063	1063.00	2.00	2
1366	NCDO2118_RS07205	tellurite resistance protein TelA 1503792:1504970 reverse MW:44310	Regular	1358031	1.37	443103053	19	8	32	7.91	110998	99548	25017	0	4	Pass2	PepFrag2	None	17899113	LTQQNLVDTIQETMR	LTQQNLVDTIQETMR	340	15	4.07	2256	1	1	0	0	554872	38771		262	2.1	y11	245332	1666	169906358587853	129906358587853	0.0205	Red	15035	17899640	17899634	400145	2277	2277.00	2.00	2
1366	NCDO2118_RS07205	tellurite resistance protein TelA 1503792:1504970 reverse MW:44310	Regular	1358031	1.37	443103053	19	8	32	7.91	110998	99548	25017	0	5	Pass2	MissedCleavage	None	10285598	GIFTKMFGK	GIFTKMFGK	122	9	10.60	2252	1	1	0	0	1079266	41660		76	1.9	b2y7	235499	977	119039020135367	79039020135367	0.0255	Red	3973	10285564	10285598	188855	2827	2827.00	2.00	2
1366	NCDO2118_RS07205	tellurite resistance protein TelA 1503792:1504970 reverse MW:44310	Regular	1358031	1.37	443103053	19	8	32	7.91	110998	99548	25017	0	6	Pass2	MissedCleavage	None	19939495	NSEMLKASTIEAATENER	NSEMLKASTIEAATENER	313	18	4.26	2253	0	0	0	0	2294711	44936		39	1.9	y5*	228127	1816	17995760182712	799717345514136	0.0134	Red	6790	19939635	19939645	220048	1490	1490.00	3.00	3
1366	NCDO2118_RS07205	tellurite resistance protein TelA 1503792:1504970 reverse MW:44310	Regular	1358031	1.37	443103053	19	8	32	7.91	110998	99548	25017	0	7	Pass2	VarMod	Phosphoryl STY(2);Phosphoryl STY(13)	26041888	LTQQNLVDTIQETMRIQAEGR	LTQQNLVDTIQETMRIQAEGR	340	21	4.44	2255	1	1	0	0	1384308	42741		1153	2.8	b10b11-H3PO4b16y8y9-H3PO4y21	267367	2276	209190105688904	994600704592691	0.0323	Red	5817	26041929	26041900	209773	3583	3583.00	3.00	3
1366	NCDO2118_RS07205	tellurite resistance protein TelA 1503792:1504970 reverse MW:44310	Regular	1358031	1.37	443103053	19	8	32	7.91	110998	99548	25017	0	8	Pass2	VarMod	Phosphoryl STY(*)	17398211	KEAQDSTDNALIVQK	KEAQDSTDNALIVQK	208	15	4.31	2254	2	2	0	0	1508355	43114		668	1.7	b9-H3PO4b12-H3PO4y8y8y15	184967	1538	16108824788727	673921652581797	0.0115	Red	11158	17398135	17398154	274653	1273	1273.00	2.57	3
1366	NCDO2118_RS07205	tellurite resistance protein TelA 1503792:1504970 reverse MW:44310	Regular	1552221	1.97	443103053	23	8	32	15.05	49946	9543	12189	1	1	Pass1	PepFrag1	None	9875721	GLVDIETLK	GLVDIETLK	331	9	4.07	3743	4	4	2	0	24253740	55757		1709	2.2	y5y6y7y9	246529	953	117081488359117	770814883591171	0.0865	Yellow	10484	9875625	9875653	256581	4319	4319.00	1.72	2
1366	NCDO2118_RS07205	tellurite resistance protein TelA 1503792:1504970 reverse MW:44310	Regular	1552221	1.97	443103053	23	8	32	15.05	49946	9543	12189	0	2	Pass1	PepFrag1	None	13186314	LYDENLNYFK	LYDENLNYFK	173	10	4.07	3739	3	3	2	0	16747350	54149		712	1.9	y7y8y9	244685	1192	135918050833169	959180508331692	0.0562	Yellow	9532	13186298	13186320	247880	2808	2808.00	2.00	2
1366	NCDO2118_RS07205	tellurite resistance protein TelA 1503792:1504970 reverse MW:44310	Regular	1552221	1.97	443103053	23	8	32	15.05	49946	9543	12189	0	3	Pass1	PepFrag1	None	16598548	KEAQDSTDNALIVQK	KEAQDSTDNALIVQK	208	15	4.31	3742	0	0	0	0	1625429	44019		74	2.1	b6y8	204918	1538	16108824788727	673921652581797	0.0484	Red	7572	16598513	16598555	232371	2416	2416.00	3.00	3
1366	NCDO2118_RS07205	tellurite resistance protein TelA 1503792:1504970 reverse MW:44310	Regular	1552221	1.97	443103053	23	8	32	15.05	49946	9543	12189	0	4	Pass1	PepFrag1	None	15036995	DNPILDDLMTNDK	DNPILDDLMTNDK	1	13	3.43	3740	5	5	1	2	10273130	52027	Identified	1300	1.8	b3b3b8y5y5y6y10y11	279827	1370	149132859655726	109132859655726	0.0363	Yellow	13397	15036876	15036892	286398	1814	1814.00	2.00	2
1366	NCDO2118_RS07205	tellurite resistance protein TelA 1503792:1504970 reverse MW:44310	Regular	1552221	1.97	443103053	23	8	32	15.05	49946	9543	12189	0	5	Pass1	PepFrag1	None	14007380	LIQNTNQELAEK	LIQNTNQELAEK	256	12	4.26	3738	2	2	0	0	4692119	48623		175	1.4	y9y10y12	177303	1305	144377652221186	104377652221186	0.0203	Red	1025	14007355	14007374	150332	1013	1013.00	2.00	2
1366	NCDO2118_RS07205	tellurite resistance protein TelA 1503792:1504970 reverse MW:44310	Regular	1552221	1.97	443103053	23	8	32	15.05	49946	9543	12189	0	6	Pass2	PepFrag2	None	9515146	SIFEVTQK	SIFEVTQK	134	8	7.00	3741	2	2	0	0	1059513	42161		1388	4.1	b2y6*y8y8*	185023	888	111695311775979	716953117759785	0.5427	Red	8949	9515209	9515237	244135	27104	27104.00	1.91	2
1366	NCDO2118_RS07205	tellurite resistance protein TelA 1503792:1504970 reverse MW:44310	Regular	1552221	1.97	443103053	23	8	32	15.05	49946	9543	12189	0	7	Pass2	MissedCleavage	None	19939495	NSEMLKASTIEAATENER	NSEMLKASTIEAATENER	313	18	4.26	3744	1	1	0	0	814900	41021		6100	3.5	b7y10y18	214109	1816	17995760182712	13995760182712	0.1636	Red	11398	19939464	19939452	266405	8172	8172.00	2.08	2
1366	NCDO2118_RS07205	tellurite resistance protein TelA 1503792:1504970 reverse MW:44310	Regular	1552221	1.97	443103053	23	8	32	15.05	49946	9543	12189	0	8	Pass2	VarMod	Phosphoryl STY(7)	11875820	RSIFEVTQK	RSIFEVTQK	133	9	10.12	3745	4	4	1	1	3154325	46899		413	1.4	b2b3b4b6b8-H3PO4b9*y7	157993	1036	123784463240813	837844632408126	0.0265	Red	20432	11875879	11875904	379160	1324	1324.00	2.00	2
1366	NCDO2118_RS07205	tellurite resistance protein TelA 1503792:1504970 reverse MW:44310	Regular	1552221	1.97	443103053	23	8	32	15.05	49946	9543	12189	0	9	Pass2	InSource	None	8174666	VDIETLK	GLVDIETLK	333	7	4.07	3743	2	2	0	0	6049789	0.0000		318	0.0	y3y7	246529	781	102532211203983	165064422407966	0.0195	Yellow	10481	8174648	8174665	256574	976	976.00	1.00	1
1366	NCDO2118_RS07205	tellurite resistance protein TelA 1503792:1504970 reverse MW:44310	Regular	1577825	3.2	443103053	23	5	32	4.59	114360	153451.5	25712	1	1	Pass1	PepFrag1	None	7213549	NSEMLK	NSEMLK	313	6	7.00	2914	4	4	0	1	25766190	56091		20977	4.0	b3b3b5b5*y3y6y6*	128899	661	917403953113942	143480790622788	0.8361	Green	4777	7213501	7213516	181466	95617	95617.00	1.00	1
1366	NCDO2118_RS07205	tellurite resistance protein TelA 1503792:1504970 reverse MW:44310	Regular	1577825	3.2	443103053	23	5	32	4.59	114360	153451.5	25712	0	2	Pass1	PepFrag1	None	14007380	LIQNTNQELAEK	LIQNTNQELAEK	256	12	4.26	2913	8	8	6	0	36656250	57622		1226	2.8	y2y3y7y8y9y10y10*y11y12	182154	1305	144377652221186	104377652221186	0.0584	Green	2057	14007394	14007404	150740	6684	6684.00	2.00	2
1366	NCDO2118_RS07205	tellurite resistance protein TelA 1503792:1504970 reverse MW:44310	Regular	1577825	3.2	443103053	23	5	32	4.59	114360	153451.5	25712	0	3	Pass2	PepFrag2	None	12916124	ASTIEAATENER	ASTIEAATENER	319	12	3.96	2915	0	0	0	0	2002956	44997		66	1.9	y6	146225	1155	133090673770468	930906737704675	0.0198	Red	2242	12915975	12915990	153783	2261	2261.00	2.00	2
1366	NCDO2118_RS07205	tellurite resistance protein TelA 1503792:1504970 reverse MW:44310	Regular	1577825	3.2	443103053	23	5	32	4.59	114360	153451.5	25712	0	4	Pass2	MissedCleavage	None	24802151	EAQDSTDNALIVQKVNDLESYK	EAQDSTDNALIVQKVNDLESYK	209	22	3.86	2916	5	5	0	1	3178061	47002		2019	3.5	b7b10y9y15y22	269829	2277	209251375398959	169251375398959	0.0564	Red	16401	24802063	24801968	304254	6445	6445.00	2.37	2
1366	NCDO2118_RS07205	tellurite resistance protein TelA 1503792:1504970 reverse MW:44310	Regular	1577825	3.2	443103053	23	5	32	4.59	114360	153451.5	25712	0	5	Pass2	VarMod	Oxidation M(4)	20099444	NSEMLKASTIEAATENER	NSEMLKASTIEAATENER	313	18	4.26	2917	6	6	0	0	3650104	47604		1424	2.5	b10*b12b15b18b18*y4y8y9y10*y13*y18	232890	1816	17995760182712	13995760182712	0.0293	Red	16214	20099451	20099414	300939	3353	3353.00	2.07	2
1366	NCDO2118_RS07205	tellurite resistance protein TelA 1503792:1504970 reverse MW:44310	Regular	1372396	3.23	443103053	15	10	32	15.05	55839	43159	8636	1	1	Pass1	PepFrag1	None	7213549	NSEMLK	NSEMLK	313	6	7.00	2270	2	2	0	0	5663632	48906		5399	3.9	b5y3y6	136943	661	917403953113942	143480790622788	0.5989	Red	2044	7213512	7213529	180774	33440	33440.00	1.00	1
1366	NCDO2118_RS07205	tellurite resistance protein TelA 1503792:1504970 reverse MW:44310	Regular	1372396	3.23	443103053	15	10	32	15.05	55839	43159	8636	0	2	Pass1	PepFrag1	None	11936525	ISAFSQSVLNK	ISAFSQSVLNK	78	11	10.10	2266	1	1	0	0	1009520	41416		109	2.6	b5b5	225147	1119	130310584226708	903105842267078	0.1076	Red	6169	11936473	11936495	242475	6011	6011.00	2.00	2
1366	NCDO2118_RS07205	tellurite resistance protein TelA 1503792:1504970 reverse MW:44310	Regular	1372396	3.23	443103053	15	10	32	15.05	55839	43159	8636	0	3	Pass1	PepFrag1	None	16598548	KEAQDSTDNALIVQK	KEAQDSTDNALIVQK	208	15	4.31	2268	0	0	0	0	920822	41017		124	2.5	b6*y8*y9	184287	1538	16108824788727	673921652581797	0.0664	Red	5419	16598477	16598506	232855	3708	3708.00	3.00	3
1366	NCDO2118_RS07205	tellurite resistance protein TelA 1503792:1504970 reverse MW:44310	Regular	1372396	3.23	443103053	15	10	32	15.05	55839	43159	8636	0	4	Pass1	PepFrag1	None	9875721	GLVDIETLK	GLVDIETLK	331	9	4.07	2265	3	3	0	0	23086690	55008		530	1.7	b7y6y9	248092	953	117081488359117	770814883591171	0.0400	Yellow	7417	9875682	9875708	257282	2231	2231.00	1.76	2
1366	NCDO2118_RS07205	tellurite resistance protein TelA 1503792:1504970 reverse MW:44310	Regular	1372396	3.23	443103053	15	10	32	15.05	55839	43159	8636	0	5	Pass1	PepFrag1	None	13186314	LYDENLNYFK	LYDENLNYFK	173	10	4.07	2264	3	3	2	0	13862310	52793		761	1.7	y7y8y9	260843	1192	135918050833169	959180508331692	0.0351	Yellow	6750	13186265	13186283	248496	1960	1960.00	2.00	2
1366	NCDO2118_RS07205	tellurite resistance protein TelA 1503792:1504970 reverse MW:44310	Regular	1372396	3.23	443103053	15	10	32	15.05	55839	43159	8636	0	6	Pass2	PepFrag2	None	9515146	SIFEVTQK	SIFEVTQK	134	8	7.00	2273	2	2	0	0	6780684	49688		1019	1.5	y6y8	192284	888	111695311775979	183390623551957	0.0341	Yellow	2558	9514917	9514930	190426	1903	1903.00	1.00	1
1366	NCDO2118_RS07205	tellurite resistance protein TelA 1503792:1504970 reverse MW:44310	Regular	1372396	3.23	443103053	15	10	32	15.05	55839	43159	8636	0	7	Pass2	PepFrag2	None	14848471	IQTSINTAIPLWK	IQTSINTAIPLWK	268	13	10.10	2269	1	1	0	0	345246	36756	Missing	30	1.5	b8	305036	1420	152739675565711	112739675565711	0.0192	Red	6276	14848308	14848319	243803	1073	1073.00	2.00	2
1366	NCDO2118_RS07205	tellurite resistance protein TelA 1503792:1504970 reverse MW:44310	Regular	1372396	3.23	443103053	15	10	32	15.05	55839	43159	8636	0	8	Pass2	PepFrag2	None	15317598	EAQDSTDNALIVQK	EAQDSTDNALIVQK	209	14	3.70	2267	1	1	0	0	5281677	48603		33	1.5	y12	223222	1403	151518181103703	111518181103703	0.0167	Red	4274	15317730	15317738	218006	931	931.00	2.00	2
1366	NCDO2118_RS07205	tellurite resistance protein TelA 1503792:1504970 reverse MW:44310	Regular	1372396	3.23	443103053	15	10	32	15.05	55839	43159	8636	0	9	Pass2	VarMod	Phosphoryl STY(*)	17688616	ASLAAVEVLSTEELEK	ASLAAVEVLSTEELEK	36	16	3.79	2271	1	1	0	0	2877528	45965		66	2.5	y8y13	307872	1593	164906136923836	699374246158909	0.0620	Red	4167	17688561	17688590	216503	3463	3463.00	2.74	3
1366	NCDO2118_RS07205	tellurite resistance protein TelA 1503792:1504970 reverse MW:44310	Regular	1372396	3.23	443103053	15	10	32	15.05	55839	43159	8636	0	10	Pass2	VarMod	Oxidation M(6)	11165718	SEIVKMHEK	SEIVKMHEK	27	9	7.82	2272	1	1	0	0	624638	39331		565	1.3	b6b7y9	115598	1032	12346563632802	834656363280198	0.0200	Red	10895	11165632	11165656	306458	1119	1119.00	1.66	2
1367	NCDO2118_RS07210	5-bromo-4-chloroindolyl phosphate hydrolase 1505115:1505723 reverse MW:23720	Regular	5014021	0.44	237204104	24	4	23	21.29	29574	32517	8882	1	1	Pass1	PepFrag1	None	18759182	EDDLQVVESVTGGLEASK	EDDLQVVESVTGGLEASK	96	18	3.50	1551	14	14	8	4	54894040	64397		3605	3.9	b2b3b4b4b5b5b6b6b7b8b10b11y3y7y8y9y11y12y14	263805	1723	173760004501375	133760004501375	0.3665	Green	15088	18759228	18759234	311884	10839	10839.00	2.14	2
1367	NCDO2118_RS07210	5-bromo-4-chloroindolyl phosphate hydrolase 1505115:1505723 reverse MW:23720	Regular	5014021	0.44	237204104	24	4	23	21.29	29574	32517	8882	0	2	Pass2	PepFrag2	None	9414727	QNEFLYK	QNEFLYK	129	7	6.89	1552	0	0	0	0	3534220	52485		77	1.2	b4	191534	854	108825719704185	688257197041846	0.0357	Yellow	5645	9414693	9414721	184337	1055	1055.00	2.00	2
1367	NCDO2118_RS07210	5-bromo-4-chloroindolyl phosphate hydrolase 1505115:1505723 reverse MW:23720	Regular	5014021	0.44	237204104	24	4	23	21.29	29574	32517	8882	0	3	Pass2	VarMod	Phosphoryl STY(10);Phosphoryl STY(17)	24151033	YIVQNPQELTKQNEFLYK	YIVQNPQELTKQNEFLYK	118	18	7.00	1554	6	6	0	0	4995799	53988	Identified	1940	3.7	b4b18y7y13y15y18	296937	2099	198198909166462	921326061109748	0.3205	Yellow	16536	24150964	24150959	374738	9478	9478.00	2.61	3
1367	NCDO2118_RS07210	5-bromo-4-chloroindolyl phosphate hydrolase 1505115:1505723 reverse MW:23720	Regular	5014021	0.44	237204104	24	4	23	21.29	29574	32517	8882	0	4	Pass2	VarMod	Oxidation M(5)	8324233	DLPNMVK	DLPNMVK	136	7	6.78	1553	4	4	2	0	1904890	49801	Identified	3260	2.5	b6b7y5*y6y7y7*	169698	765	101127031163723	162254062327446	0.2773	Yellow	8712	8324241	8324258	214960	8202	8202.00	1.00	1
1367	NCDO2118_RS07210	5-bromo-4-chloroindolyl phosphate hydrolase 1505115:1505723 reverse MW:23720	Regular	4432501	0.61	237204104	19	5	23	26.73	19630	16477	3973	1	1	Pass1	PepFrag1	None	9414727	QNEFLYK	QNEFLYK	129	7	6.89	2342	5	5	1	0	21732360	59838		1812	2.6	b2*b3*b3b4*b5b5b6*b7y3y6y7	190001	854	108825719704185	688257197041846	0.4767	Green	4925	9414691	9414723	181457	9357	9357.00	1.86	2
1367	NCDO2118_RS07210	5-bromo-4-chloroindolyl phosphate hydrolase 1505115:1505723 reverse MW:23720	Regular	4432501	0.61	237204104	19	5	23	26.73	19630	16477	3973	0	2	Pass1	PepFrag1	None	11726773	DLDETLLLIK	DLDETLLLIK	163	10	3.70	2345	1	1	0	0	1493871	48210		41	2.4	y9	334953	1139	131858698141081	918586981410812	0.2549	Red	18431	11726775	11726806	327409	5003	5003.00	2.00	2
1367	NCDO2118_RS07210	5-bromo-4-chloroindolyl phosphate hydrolase 1505115:1505723 reverse MW:23720	Regular	4432501	0.61	237204104	19	5	23	26.73	19630	16477	3973	0	3	Pass1	PepFrag1	None	18759182	EDDLQVVESVTGGLEASK	EDDLQVVESVTGGLEASK	96	18	3.50	2343	10	10	5	2	35947690	62023		1332	2.1	b4b5b6b9b12*b16b18y7y8y11y12y13y18	269003	1723	173760004501375	133760004501375	0.1078	Green	17687	18759217	18759218	310392	2117	2117.00	2.00	2
1367	NCDO2118_RS07210	5-bromo-4-chloroindolyl phosphate hydrolase 1505115:1505723 reverse MW:23720	Regular	4432501	0.61	237204104	19	5	23	26.73	19630	16477	3973	0	4	Pass2	PepFrag2	None	10675740	MIIGISFMR	MIIGISFMR	30	9	11.05	2344	2	2	0	0	3735154	52190		758	1.7	y6y9	305061	1024	122826743797091	828267437970914	0.1149	Yellow	10817	10675785	10675817	229823	2256	2256.00	2.00	2
1367	NCDO2118_RS07210	5-bromo-4-chloroindolyl phosphate hydrolase 1505115:1505723 reverse MW:23720	Regular	4432501	0.61	237204104	19	5	23	26.73	19630	16477	3973	0	5	Pass2	PepFrag2	None	12066477	IFRENLSEAK	IFRENLSEAK	74	10	7.11	2346	1	1	0	0	4762516	53245		30	1.3	y4	179567	1120	13038820780916	903882078091601	0.0457	Yellow	3091	12066769	12066799	164127	897	897.00	2.00	2
1367	NCDO2118_RS07210	5-bromo-4-chloroindolyl phosphate hydrolase 1505115:1505723 reverse MW:23720	Regular	4698234	0.77	237204104	15	4	23	12.38	47403	22449	9735	1	1	Pass1	PepFrag1	None	18759182	EDDLQVVESVTGGLEASK	EDDLQVVESVTGGLEASK	96	18	3.50	1866	10	10	5	2	48670740	63592		4568	4.1	b6b6b7b7b9b12y7y7y8y11y12y12y13y14y18	263603	1723	173760004501375	133760004501375	0.2705	Green	18214	18759193	18759205	311537	12822	12822.00	2.13	2
1367	NCDO2118_RS07210	5-bromo-4-chloroindolyl phosphate hydrolase 1505115:1505723 reverse MW:23720	Regular	4698234	0.77	237204104	15	4	23	12.38	47403	22449	9735	0	2	Pass2	PepFrag2	None	6673484	FIEMK	FIEMK	147	5	7.00	1869	1	1	0	0	138556	38136		249	2.0	y1y4	161866	627	885668763889684	137133752777937	0.4696	Red	3942	6673314	6673339	162196	22260	22260.00	1.00	1
1367	NCDO2118_RS07210	5-bromo-4-chloroindolyl phosphate hydrolase 1505115:1505723 reverse MW:23720	Regular	4698234	0.77	237204104	15	4	23	12.38	47403	22449	9735	0	3	Pass2	PepFrag2	None	8164284	DLPNMVK	DLPNMVK	136	7	6.78	1868	1	1	0	0	10325300	56858	Identified	507	1.5	y5*y7	169034	765	101127031163723	162254062327446	0.0452	Green	5423	8164460	8164485	175102	2144	2144.00	1.00	1
1367	NCDO2118_RS07210	5-bromo-4-chloroindolyl phosphate hydrolase 1505115:1505723 reverse MW:23720	Regular	4698234	0.77	237204104	15	4	23	12.38	47403	22449	9735	0	4	Pass2	VarMod	Oxidation M(5)	8324233	DLPNMVK	DLPNMVK	136	7	6.78	1867	3	3	1	0	2099490	49940	Missing	4411	2.7	b6y6y7y7*	169034	765	101127031163723	162254062327446	0.2147	Yellow	10418	8324251	8324275	213992	10177	10177.00	1.00	1
1367	NCDO2118_RS07210	5-bromo-4-chloroindolyl phosphate hydrolase 1505115:1505723 reverse MW:23720	Regular	3375693	1.82	237204104	14	4	23	12.38	94203	19416	9898	1	1	Pass1	PepFrag1	None	18759182	EDDLQVVESVTGGLEASK	EDDLQVVESVTGGLEASK	96	18	3.50	1434	10	10	7	3	34557770	60669		2266	3.2	b4b5b5*b5b6b6b7b8b8*b9b14y8y11y12y13y14y17	270040	1723	173760004501375	133760004501375	0.0687	Green	13661	18759184	18759185	311798	6472	6472.00	2.11	2
1367	NCDO2118_RS07210	5-bromo-4-chloroindolyl phosphate hydrolase 1505115:1505723 reverse MW:23720	Regular	3375693	1.82	237204104	14	4	23	12.38	94203	19416	9898	0	2	Pass2	PepFrag2	None	17028469	NYHEILMDDVNVIK	NYHEILMDDVNVIK	181	14	4.30	1437	1	1	0	0	1270882	46325		206	1.7	b5	287151	1583	16421528464466	12421528464466	0.0151	Red	8902	17028075	17028083	230211	1427	1427.00	2.00	2
1367	NCDO2118_RS07210	5-bromo-4-chloroindolyl phosphate hydrolase 1505115:1505723 reverse MW:23720	Regular	3375693	1.82	237204104	14	4	23	12.38	94203	19416	9898	0	3	Pass2	PepFrag2	None	9414727	QNEFLYK	QNEFLYK	129	7	6.89	1436	1	1	0	0	6008243	53071		34	1.1	y6	191424	854	108825719704185	688257197041846	0.0093	Yellow	4663	9414788	9414811	183838	872	872.00	2.00	2
1367	NCDO2118_RS07210	5-bromo-4-chloroindolyl phosphate hydrolase 1505115:1505723 reverse MW:23720	Regular	3375693	1.82	237204104	14	4	23	12.38	94203	19416	9898	0	4	Pass2	VarMod	Phosphoryl STY(10)	23351370	YIVQNPQELTKQNEFLYK	YIVQNPQELTKQNEFLYK	118	18	7.00	1435	2	2	0	0	2094334	48494	Missing	7392	8.3	b13b18y8*y12*y18	291714	2099	198198909166462	921326061109748	0.9069	Red	14562	23351399	23351387	348867	85432	85432.00	2.68	3
1368	NCDO2118_RS07215	glycerol-3-phosphate dehydrogenase 1505933:1506958 forward MW:37188	Regular	1624713	0	371883992	6	1	26	2.05	2582	7746	1214	1	1	Pass1	PepFrag1	None	8174302	DVVLDEK	DVVLDEK	53	7	3.70	764	6	6	3	1	79146750	61092		1214	1.6	b2b3y2y3y4y7	155116	760	100685909104663	161371818209326	10000	Yellow	3097	8174303	8174317	148862	2582	2582.00	1.00	1
1368	NCDO2118_RS07215	glycerol-3-phosphate dehydrogenase 1505933:1506958 forward MW:37188	Regular	11050020	0	371883992	31	6	26	17.60	66430	56744	29468	1	1	Pass1	PepFrag1	None	18789920	GEIVVVSGPSHAEETIVR	GEIVVVSGPSHAEETIVR	131	18	4.53	1240	8	8	4	2	15371960	62301	Identified	15702	4.6	b3b3b4b5b7b13y5y10y11y12y14y15	263259	1753	175771143567208	771807623781385	0.2520	Green	10088	18789907	18789915	226721	16741	16741.00	2.88	3
1368	NCDO2118_RS07215	glycerol-3-phosphate dehydrogenase 1505933:1506958 forward MW:37188	Regular	11050020	0	371883992	31	6	26	17.60	66430	56744	29468	0	2	Pass1	PepFrag1	None	17728272	IWGNNPEQMAEINEK	IWGNNPEQMAEINEK	30	15	3.96	1241	11	11	4	2	199214000	73427	Identified	6900	4.2	b3b4b5*b11b15y4y8y9y10y10*y11y13y15	229144	1604	165664406959219	125664406959219	0.2337	Green	10501	17728323	17728307	231029	15528	15528.00	2.00	2
1368	NCDO2118_RS07215	glycerol-3-phosphate dehydrogenase 1505933:1506958 forward MW:37188	Regular	11050020	0	371883992	31	6	26	17.60	66430	56744	29468	0	3	Pass1	PepFrag1	None	10785164	AENEFINNK	AENEFINNK	332	9	4.26	1244	0	0	0	0	3434150	55792		34	1.7	b5*	158703	967	118225352319487	782253523194874	0.0317	Green	4565	10785119	10785141	179372	2108	2108.00	2.00	2
1368	NCDO2118_RS07215	glycerol-3-phosphate dehydrogenase 1505933:1506958 forward MW:37188	Regular	11050020	0	371883992	31	6	26	17.60	66430	56744	29468	0	4	Pass1	PepFrag1	None	8174302	DVVLDEK	DVVLDEK	53	7	3.70	1242	2	2	0	0	1996288	53436		404	1.3	b5y7	170322	760	100685909104663	161371818209326	0.0220	Yellow	4755	8174279	8174292	181251	1462	1462.00	1.00	1
1368	NCDO2118_RS07215	glycerol-3-phosphate dehydrogenase 1505933:1506958 forward MW:37188	Regular	11050020	0	371883992	31	6	26	17.60	66430	56744	29468	0	5	Pass2	PepFrag2	None	10645623	VLYENLDAK	VLYENLDAK	311	9	4.07	1243	7	7	3	1	50918950	67502		3917	4.1	b3b5y3y6y6y7y8y9y9*	204172	992	120254337195495	802543371954953	0.3684	Green	7243	10645490	10645511	204285	24475	24475.00	1.97	2
1368	NCDO2118_RS07215	glycerol-3-phosphate dehydrogenase 1505933:1506958 forward MW:37188	Regular	11050020	0	371883992	31	6	26	17.60	66430	56744	29468	0	6	Pass2	MissedCleavage	None	10586092	DVVLDEKIK	DVVLDEKIK	53	9	4.31	1245	3	3	0	0	5964287	58189		2511	2.5	b2b2b5y5y5	200611	1019	122426591069237	824265910692372	0.0921	Green	9241	10586086	10586108	220658	6116	6116.00	2.00	2
1368	NCDO2118_RS07215	glycerol-3-phosphate dehydrogenase 1505933:1506958 forward MW:37188	Regular	21270080	0	371883992	24	5	26	21.11	23954	24573	10669	1	1	Pass1	PepFrag1	None	17728272	IWGNNPEQMAEINEK	IWGNNPEQMAEINEK	30	15	3.96	874	17	17	9	5	472903800	80025	Identified	7665	4.2	b2b3b5b5*b7*b8b11b12y2y3y4y5y6y8y10y10*y11y12y13y15y15*	245402	1604	165664406959219	125664406959219	0.6467	Green	7552	17728277	17728265	230939	15490	15490.00	2.00	2
1368	NCDO2118_RS07215	glycerol-3-phosphate dehydrogenase 1505933:1506958 forward MW:37188	Regular	21270080	0	371883992	24	5	26	21.11	23954	24573	10669	0	2	Pass1	PepFrag1	None	16118952	ISTILEEEIPAQLR	ISTILEEEIPAQLR	117	14	3.96	875	1	1	0	0	10792500	63609	Identified	188	1.4	y3*y5y13*	317239	1532	160669019880284	120669019880284	0.0372	Green	15700	16118896	16118897	314286	892	892.00	2.00	2
1368	NCDO2118_RS07215	glycerol-3-phosphate dehydrogenase 1505933:1506958 forward MW:37188	Regular	21270080	0	371883992	24	5	26	21.11	23954	24573	10669	0	3	Pass2	PepFrag2	None	6593471	AGDALGR	AGDALGR	261	7	7.00	878	3	3	0	0	1206186	54092		2053	2.0	b7y5y7	96294	593	853354395412723	130670879082545	0.1932	Yellow	2597	6593360	6593376	173882	4627	4627.00	1.00	1
1368	NCDO2118_RS07215	glycerol-3-phosphate dehydrogenase 1505933:1506958 forward MW:37188	Regular	21270080	0	371883992	24	5	26	21.11	23954	24573	10669	0	4	Pass2	MissedCleavage	None	19640521	VLYENLDAKTGILDIMR	VLYENLDAKTGILDIMR	311	17	4.31	877	3	3	0	0	3190591	58316		713	2.0	b3b9y14y17	331465	1868	183376726366764	143376726366764	0.0720	Green	16881	19640695	19640666	328704	1724	1724.00	2.00	2
1368	NCDO2118_RS07215	glycerol-3-phosphate dehydrogenase 1505933:1506958 forward MW:37188	Regular	21270080	0	371883992	24	5	26	21.11	23954	24573	10669	0	5	Pass2	MissedCleavage	None	20360402	LADIEKNMGMVIEGVSTTK	LADIEKNMGMVIEGVSTTK	271	19	4.44	876	0	0	0	0	2771604	57705		50	1.8	y11	266211	1927	187217932097617	848119547317449	0.0510	Green	12379	20360277	20360301	278267	1221	1221.00	2.53	3
1368	NCDO2118_RS07215	glycerol-3-phosphate dehydrogenase 1505933:1506958 forward MW:37188	Regular	16513620	0	371883992	51	10	26	43.99	93769	53944	22887	1	1	Pass1	PepFrag1	None	9185077	TGILDIMR	TGILDIMR	320	8	7.00	2613	7	7	5	1	98316210	72105		4893	3.5	b3y2y3y4y5y6y7	252943	876	110686767625355	706867676253554	0.1963	Green	17485	9185004	9185028	290151	18408	18408.00	2.00	2
1368	NCDO2118_RS07215	glycerol-3-phosphate dehydrogenase 1505933:1506958 forward MW:37188	Regular	16513620	0	371883992	51	10	26	43.99	93769	53944	22887	0	2	Pass1	PepFrag1	None	18950134	NIIAVGAGALHGLGFGDNAK	NIIAVGAGALHGLGFGDNAK	194	20	7.82	2614	5	5	0	0	17162120	64524		3639	4.9	b11y3y3*y4y7y11*y12*y15y17*y17y18	339474	1780	17757137968626	783809197908399	0.1904	Green	26359	18950091	18950113	327309	17852	17852.00	2.97	3
1368	NCDO2118_RS07215	glycerol-3-phosphate dehydrogenase 1505933:1506958 forward MW:37188	Regular	16513620	0	371883992	51	10	26	43.99	93769	53944	22887	0	3	Pass1	PepFrag1	None	30585878	LGVAMGAEPLTYSGLSGVGDLIVTGTSIHSR	LGVAMGAEPLTYSGLSGVGDLIVTGTSIHSR	227	31	5.22	2615	13	13	3	2	88036950	71625	Identified	3233	5.7	b4b6b7b8b26y3y6y8y9y18y23y25y28	378164	2873	244333707424317	122889138282878	0.1886	Green	39015	30585909	30585842	383178	17684	17684.00	3.00	3
1368	NCDO2118_RS07215	glycerol-3-phosphate dehydrogenase 1505933:1506958 forward MW:37188	Regular	16513620	0	371883992	51	10	26	43.99	93769	53944	22887	0	4	Pass1	PepFrag1	None	14947012	YAQAIFSNDYFR	YAQAIFSNDYFR	165	12	6.67	2612	7	7	4	2	131351300	73363		6265	4.0	b3b5b10*y6y7y8y8y9y10y10y12*	275381	1332	146362263555188	106362263555188	0.1872	Green	14917	14947003	14947016	279620	17557	17557.00	2.00	2
1368	NCDO2118_RS07215	glycerol-3-phosphate dehydrogenase 1505933:1506958 forward MW:37188	Regular	16513620	0	371883992	51	10	26	43.99	93769	53944	22887	0	5	Pass1	PepFrag1	None	13666705	NMGMVIEGVSTTK	NMGMVIEGVSTTK	277	13	7.00	2611	1	1	0	0	5063848	59223		81	1.6	y7	271046	1277	142305023832494	102305023832494	0.0132	Yellow	7359	13666739	13666756	240367	1240	1240.00	2.00	2
1368	NCDO2118_RS07215	glycerol-3-phosphate dehydrogenase 1505933:1506958 forward MW:37188	Regular	16513620	0	371883992	51	10	26	43.99	93769	53944	22887	0	6	Pass1	PepFrag1	None	17728272	IWGNNPEQMAEINEK	IWGNNPEQMAEINEK	30	15	3.96	2616	1	1	0	0	6031490	59983	Identified	141	1.5	y10	251574	1604	165664406959219	125664406959219	0.0103	Yellow	5218	17728189	17728189	224555	964	964.00	2.00	2
1368	NCDO2118_RS07215	glycerol-3-phosphate dehydrogenase 1505933:1506958 forward MW:37188	Regular	16513620	0	371883992	51	10	26	43.99	93769	53944	22887	0	7	Pass2	PepFrag2	None	10746088	TGILDIMRR	TGILDIMRR	320	9	10.89	2617	1	1	0	0	4412256	58625		32	1.2	y5	192506	1024	122826743797091	828267437970914	0.0101	Yellow	1969	10745936	10745958	188876	945	945.00	2.00	2
1368	NCDO2118_RS07215	glycerol-3-phosphate dehydrogenase 1505933:1506958 forward MW:37188	Regular	16513620	0	371883992	51	10	26	43.99	93769	53944	22887	0	8	Pass2	VarMod	Phosphoryl STY(3)	10985442	DITLISAASK	DITLISAASK	149	10	6.78	2619	5	5	1	0	2983029	56925		2073	3.1	b5b7b9-H3PO4y7y8y10	238227	971	118551154443402	785511544434018	0.1126	Yellow	35314	10985468	10985491	364865	10561	10561.00	1.77	2
1368	NCDO2118_RS07215	glycerol-3-phosphate dehydrogenase 1505933:1506958 forward MW:37188	Regular	16513620	0	371883992	51	10	26	43.99	93769	53944	22887	0	9	Pass2	VarMod	Phosphoryl STY(15)	19589583	GEIVVVSGPSHAEETIVR	GEIVVVSGPSHAEETIVR	131	18	4.53	2618	5	5	0	0	6455951	60278	Missing	520	2.5	b12b16b18y12y14	285411	1753	175771143567208	135771143567208	0.0357	Green	47385	19589607	19589596	461633	3352	3352.00	2.00	2
1368	NCDO2118_RS07215	glycerol-3-phosphate dehydrogenase 1505933:1506958 forward MW:37188	Regular	16513620	0	371883992	51	10	26	43.99	93769	53944	22887	0	10	Pass2	VarMod	Phosphoryl STY(21)	25403048	AFDRLDLALEDVDAILFVVPTK	AFDRLDLALEDVDAILFVVPTK	62	22	3.77	2620	3	3	0	1	4257489	58470	Identified	671	2.0	b8b11b15y3-H3PO4y8-H3PO4y11y14	487293	2345	213396945560493	666984727802466	0.0156	Yellow	26018	25403120	25403152	325675	1460	1460.00	3.75	4
1368	NCDO2118_RS07215	glycerol-3-phosphate dehydrogenase 1505933:1506958 forward MW:37188	Regular	16513620	0	371883992	51	10	26	43.99	93769	53944	22887	0	11	Pass2	InSource	None	5342704	DIMR	TGILDIMR	324	4	7.00	2613	2	2	1	0	13524820	0.0000		343	0.0	y3y4	252943	487	748362944351787	109672588870357	0.0205	Green	17490	5342701	5342721	290170	1918	1918.00	1.00	1
1368	NCDO2118_RS07215	glycerol-3-phosphate dehydrogenase 1505933:1506958 forward MW:37188	Regular	16513620	0	371883992	51	10	26	43.99	93769	53944	22887	0	12	Pass2	InSource	None	8174600	GILDIMR	TGILDIMR	321	7	7.00	2613	1	1	0	0	1823701	0.0000		996	0.0	y7	252943	783	102707180900706	165414361801413	0.0195	Green	17493	8174589	8174610	290200	1828	1828.00	1.00	1
1368	NCDO2118_RS07215	glycerol-3-phosphate dehydrogenase 1505933:1506958 forward MW:37188	Regular	36935760	0	371883992	41	9	26	31.67	80942	69031	31766	1	1	Pass1	PepFrag1	None	17728272	IWGNNPEQMAEINEK	IWGNNPEQMAEINEK	30	15	3.96	527	19	19	12	4	781731300	84605	Identified	23450	6.0	b2b3b4b5b5*b7b8*b11b11*b14b15*y2y3y5y6y7y8y8*y9y9y10y10*y11y11*y13y14y15y15*	216515	1604	165664406959219	125664406959219	0.5300	Green	10866	17728272	17728279	230259	42897	42897.00	2.01	2
1368	NCDO2118_RS07215	glycerol-3-phosphate dehydrogenase 1505933:1506958 forward MW:37188	Regular	36935760	0	371883992	41	9	26	31.67	80942	69031	31766	0	2	Pass1	PepFrag1	None	18789920	GEIVVVSGPSHAEETIVR	GEIVVVSGPSHAEETIVR	131	18	4.53	526	10	10	4	1	23473530	69380	Identified	4796	4.3	b2b4b10b11y4y10y11y12y14y15	261094	1753	175771143567208	771807623781385	0.1715	Green	10220	18789851	18789874	224197	13885	13885.00	3.00	3
1368	NCDO2118_RS07215	glycerol-3-phosphate dehydrogenase 1505933:1506958 forward MW:37188	Regular	36935760	0	371883992	41	9	26	31.67	80942	69031	31766	0	3	Pass1	PepFrag1	None	10645623	VLYENLDAK	VLYENLDAK	311	9	4.07	525	3	3	0	0	39031990	71589		1133	3.2	b9y3y8	203889	992	120254337195495	802543371954953	0.1513	Green	7445	10645597	10645629	202775	12249	12249.00	2.00	2
1368	NCDO2118_RS07215	glycerol-3-phosphate dehydrogenase 1505933:1506958 forward MW:37188	Regular	36935760	0	371883992	41	9	26	31.67	80942	69031	31766	0	4	Pass1	PepFrag1	None	14947012	YAQAIFSNDYFR	YAQAIFSNDYFR	165	12	6.67	529	0	0	0	0	1738707	58077		265	2.3	y5*y9	279442	1332	146362263555188	106362263555188	0.0492	Green	13198	14947018	14947040	252763	3982	3982.00	2.00	2
1368	NCDO2118_RS07215	glycerol-3-phosphate dehydrogenase 1505933:1506958 forward MW:37188	Regular	36935760	0	371883992	41	9	26	31.67	80942	69031	31766	0	5	Pass1	PepFrag1	None	8174302	DVVLDEK	DVVLDEK	53	7	3.70	528	3	3	0	0	1599669	57715		654	1.6	b4b6y7	174352	760	100685909104663	161371818209326	0.0325	Green	4714	8174232	8174250	179504	2627	2627.00	1.00	1
1368	NCDO2118_RS07215	glycerol-3-phosphate dehydrogenase 1505933:1506958 forward MW:37188	Regular	36935760	0	371883992	41	9	26	31.67	80942	69031	31766	0	6	Pass2	PepFrag2	None	30585878	LGVAMGAEPLTYSGLSGVGDLIVTGTSIHSR	LGVAMGAEPLTYSGLSGVGDLIVTGTSIHSR	227	31	5.22	533	0	0	0	0	1933582	58538	Missing	39	2.6	b16	340456	2873	244333707424317	122889138282878	0.0256	Green	18585	30585128	30585050	331552	2069	2069.00	2.51	3
1368	NCDO2118_RS07215	glycerol-3-phosphate dehydrogenase 1505933:1506958 forward MW:37188	Regular	36935760	0	371883992	41	9	26	31.67	80942	69031	31766	0	7	Pass2	PepFrag2	None	6883876	LADIEK	LADIEK	271	6	4.07	532	2	2	0	0	551754	53092		306	1.0	b3y1	132619	650	907197556834765	141439511366953	0.0107	Yellow	7176	6883713	6883731	200381	867	867.00	1.00	1
1368	NCDO2118_RS07215	glycerol-3-phosphate dehydrogenase 1505933:1506958 forward MW:37188	Regular	36935760	0	371883992	41	9	26	31.67	80942	69031	31766	0	8	Pass2	MissedCleavage	None	11155705	NWRAGDALGR	NWRAGDALGR	258	10	10.89	530	1	1	0	0	878305	55111		141	1.3	b5*b9*b10	153061	1000	120.9	80.9	0.0119	Yellow	2686	11155580	11155612	159708	962	962.00	2.00	2
1368	NCDO2118_RS07215	glycerol-3-phosphate dehydrogenase 1505933:1506958 forward MW:37188	Regular	36935760	0	371883992	41	9	26	31.67	80942	69031	31766	0	9	Pass2	VarMod	Oxidation M(9)	17888221	IWGNNPEQMAEINEK	IWGNNPEQMAEINEK	30	15	3.96	531	3	3	0	0	3793028	61464	Identified	982	1.7	b14b15*y10y15	216515	1604	165664406959219	125664406959219	0.0173	Green	10868	17888252	17888258	230271	1404	1404.00	2.00	2
1368	NCDO2118_RS07215	glycerol-3-phosphate dehydrogenase 1505933:1506958 forward MW:37188	Regular	16703940	0	371883992	21	7	26	26.39	43742	33398	14275	1	1	Pass1	PepFrag1	None	17728272	IWGNNPEQMAEINEK	IWGNNPEQMAEINEK	30	15	3.96	1282	18	18	12	7	367534100	77881	Identified	13474	5.1	b2b3b4b5b5*b6*b7*b9b9*b11b12b15b15y3y4y5y6y10y11y12y13y14y15	239285	1604	165664406959219	125664406959219	0.6082	Green	7359	17728361	17728364	230085	26604	26604.00	2.00	2
1368	NCDO2118_RS07215	glycerol-3-phosphate dehydrogenase 1505933:1506958 forward MW:37188	Regular	16703940	0	371883992	21	7	26	26.39	43742	33398	14275	0	2	Pass1	PepFrag1	None	9185077	TGILDIMR	TGILDIMR	320	8	7.00	1287	0	0	0	0	1768363	54704		93	2.1	b5y5	236143	876	110686767625355	706867676253554	0.0968	Yellow	7579	9185004	9185032	232402	4234	4234.00	2.00	2
1368	NCDO2118_RS07215	glycerol-3-phosphate dehydrogenase 1505933:1506958 forward MW:37188	Regular	16703940	0	371883992	21	7	26	26.39	43742	33398	14275	0	3	Pass1	PepFrag1	None	14947012	YAQAIFSNDYFR	YAQAIFSNDYFR	165	12	6.67	1284	0	0	0	0	2460283	56138		132	2.0	y8*	277977	1332	146362263555188	106362263555188	0.0585	Yellow	12535	14946973	14946989	277823	2560	2560.00	2.00	2
1368	NCDO2118_RS07215	glycerol-3-phosphate dehydrogenase 1505933:1506958 forward MW:37188	Regular	16703940	0	371883992	21	7	26	26.39	43742	33398	14275	0	4	Pass1	PepFrag1	None	25903372	IAVLGPGSWGTALSQVLNDNGHEVR	IAVLGPGSWGTALSQVLNDNGHEVR	5	25	5.22	1285	1	1	0	0	3247775	57344	Missing	133	1.8	y7	323330	2401	216780929567471	104520619711647	0.0229	Green	17109	25903473	25903459	325019	1001	1001.00	3.00	3
1368	NCDO2118_RS07215	glycerol-3-phosphate dehydrogenase 1505933:1506958 forward MW:37188	Regular	16703940	0	371883992	21	7	26	26.39	43742	33398	14275	0	5	Pass1	PepFrag1	None	17509222	LYTNTDVVGVETAGALK	LYTNTDVVGVETAGALK	177	17	4.07	1283	1	1	0	0	2078816	55406		209	1.6	b8b10*y9	257267	1644	168407272831315	128407272831315	0.0215	Yellow	9676	17509102	17509106	249566	939	939.00	2.00	2
1368	NCDO2118_RS07215	glycerol-3-phosphate dehydrogenase 1505933:1506958 forward MW:37188	Regular	16703940	0	371883992	21	7	26	26.39	43742	33398	14275	0	6	Pass2	PepFrag2	None	13666705	NMGMVIEGVSTTK	NMGMVIEGVSTTK	277	13	7.00	1286	0	0	0	0	1330099	53467		140	2.8	b7b9*y2	229663	1277	142305023832494	548700158883291	0.1404	Yellow	6461	13666542	13666590	222112	6140	6140.00	2.53	3
1368	NCDO2118_RS07215	glycerol-3-phosphate dehydrogenase 1505933:1506958 forward MW:37188	Regular	16703940	0	371883992	21	7	26	26.39	43742	33398	14275	0	7	Pass2	PepFrag2	None	10785164	AENEFINNK	AENEFINNK	332	9	4.26	1288	1	1	0	0	615077	50117		94	1.7	b9y5	165876	967	118225352319487	782253523194874	0.0518	Red	5261	10785214	10785242	210993	2264	2264.00	2.00	2
1368	NCDO2118_RS07215	glycerol-3-phosphate dehydrogenase 1505933:1506958 forward MW:37188	Regular	28583600	0	371883992	53	10	26	43.99	345730	271758	46708	1	1	Pass1	PepFrag1	None	9185077	TGILDIMR	TGILDIMR	320	8	7.00	2127	7	7	2	0	56126960	72053		15294	5.1	b3b5y2y4y6y7y8	240921	876	110686767625355	706867676253554	0.1453	Green	19820	9185058	9185088	286524	50237	50237.00	1.61	2
1368	NCDO2118_RS07215	glycerol-3-phosphate dehydrogenase 1505933:1506958 forward MW:37188	Regular	28583600	0	371883992	53	10	26	43.99	345730	271758	46708	0	2	Pass1	PepFrag1	None	14947012	YAQAIFSNDYFR	YAQAIFSNDYFR	165	12	6.67	2126	10	10	6	2	175528600	77005		13740	5.1	b4b5y2y3y6y7y8y9y10y10y12	277681	1332	146362263555188	106362263555188	0.0992	Green	16879	14947043	14947064	275492	34307	34307.00	2.00	2
1368	NCDO2118_RS07215	glycerol-3-phosphate dehydrogenase 1505933:1506958 forward MW:37188	Regular	28583600	0	371883992	53	10	26	43.99	345730	271758	46708	0	3	Pass1	PepFrag1	None	18950134	NIIAVGAGALHGLGFGDNAK	NIIAVGAGALHGLGFGDNAK	194	20	7.82	2131	7	7	3	1	29905590	69319		4937	5.9	b4y1y2y12y13y15y16y18	337406	1780	17757137968626	783809197908399	0.0872	Green	28937	18950142	18950171	322649	30138	30138.00	3.00	3
1368	NCDO2118_RS07215	glycerol-3-phosphate dehydrogenase 1505933:1506958 forward MW:37188	Regular	28583600	0	371883992	53	10	26	43.99	345730	271758	46708	0	4	Pass1	PepFrag1	None	30585878	LGVAMGAEPLTYSGLSGVGDLIVTGTSIHSR	LGVAMGAEPLTYSGLSGVGDLIVTGTSIHSR	227	31	5.22	2128	16	16	4	4	204168500	77661	Identified	8477	6.8	b3b5b7b8b15b16y3y4y6y8y13y16y21y23y26y27y28y31	376211	2873	244333707424317	122889138282878	0.0842	Green	41787	30585971	30585880	379204	29096	29096.00	3.00	3
1368	NCDO2118_RS07215	glycerol-3-phosphate dehydrogenase 1505933:1506958 forward MW:37188	Regular	28583600	0	371883992	53	10	26	43.99	345730	271758	46708	0	5	Pass1	PepFrag1	None	16118952	ISTILEEEIPAQLR	ISTILEEEIPAQLR	117	14	3.96	2130	2	2	0	0	12035380	65366	Identified	910	2.2	y5*y10y14	332698	1532	160669019880284	671126799201891	0.0079	Green	9038	16118933	16118975	241042	2734	2734.00	2.57	3
1368	NCDO2118_RS07215	glycerol-3-phosphate dehydrogenase 1505933:1506958 forward MW:37188	Regular	28583600	0	371883992	53	10	26	43.99	345730	271758	46708	0	6	Pass2	PepFrag2	None	10185779	DITLISAASK	DITLISAASK	149	10	6.78	2135	0	0	0	0	4062385	60649		1209	8.9	b2y2y5	219227	971	118551154443402	785511544434018	0.5415	Green	7182	10186091	10186121	230095	187214	187214.00	2.00	2
1368	NCDO2118_RS07215	glycerol-3-phosphate dehydrogenase 1505933:1506958 forward MW:37188	Regular	28583600	0	371883992	53	10	26	43.99	345730	271758	46708	0	7	Pass2	PepFrag2	None	19711049	LDLALEDVDAILFVVPTK	LDLALEDVDAILFVVPTK	66	18	3.50	2129	3	3	0	1	3066405	59427	Missing	347	1.8	b8b9y10y13	470455	1904	185725240853721	145725240853721	0.0040	Yellow	48831	19710830	19710826	437532	1381	1381.00	2.20	2
1368	NCDO2118_RS07215	glycerol-3-phosphate dehydrogenase 1505933:1506958 forward MW:37188	Regular	28583600	0	371883992	53	10	26	43.99	345730	271758	46708	0	8	Pass2	VarMod	Oxidation M(10)	20520351	LADIEKNMGMVIEGVSTTK	LADIEKNMGMVIEGVSTTK	271	19	4.44	2134	3	3	0	0	3165782	59566		555	2.7	b4b9*b10b13*y5y10y17*y18	291978	1927	187217932097617	147217932097617	0.0113	Yellow	39049	20520413	20520403	366002	3895	3895.00	2.30	2
1368	NCDO2118_RS07215	glycerol-3-phosphate dehydrogenase 1505933:1506958 forward MW:37188	Regular	28583600	0	371883992	53	10	26	43.99	345730	271758	46708	0	9	Pass2	VarMod	Oxidation M(7)	10906037	TGILDIMRR	TGILDIMRR	320	9	10.89	2132	2	2	1	0	1648762	56733		163	1.6	b3b4b5	175043	1024	122826743797091	828267437970914	0.0058	Yellow	20323	10906020	10906049	288707	2020	2020.00	2.00	2
1368	NCDO2118_RS07215	glycerol-3-phosphate dehydrogenase 1505933:1506958 forward MW:37188	Regular	28583600	0	371883992	53	10	26	43.99	345730	271758	46708	0	10	Pass2	VarMod	Phosphoryl STY(*)	19919811	VHILHASKGLEQGTHER	VHILHASKGLEQGTHER	100	17	8.06	2133	1	1	0	0	1634112	56694		109	2.0	b14y14*y16	105278	1775	177238693138861	137238693138861	0.0053	Yellow	50652	19919686	19919680	455545	1825	1825.00	2.00	2
1368	NCDO2118_RS07215	glycerol-3-phosphate dehydrogenase 1505933:1506958 forward MW:37188	Regular	28583600	0	371883992	53	10	26	43.99	345730	271758	46708	0	11	Pass2	InSource	None	5342704	DIMR	TGILDIMR	324	4	7.00	2127	2	2	1	0	25149990	0.0000		967	0.0	y3y4	240921	487	748362944351787	109672588870357	0.0083	Green	19835	5342701	5342722	286558	2883	2883.00	1.00	1
1368	NCDO2118_RS07215	glycerol-3-phosphate dehydrogenase 1505933:1506958 forward MW:37188	Regular	40980190	0	371883992	37	7	26	24.34	73692	64371	20873	1	1	Pass1	PepFrag1	None	10645623	VLYENLDAK	VLYENLDAK	311	9	4.07	384	4	4	1	0	42538920	72414		3838	4.4	b9y3y8y8y9	203739	992	120254337195495	802543371954953	0.4137	Green	6216	10645558	10645587	203466	30483	30483.00	1.98	2
1368	NCDO2118_RS07215	glycerol-3-phosphate dehydrogenase 1505933:1506958 forward MW:37188	Regular	40980190	0	371883992	37	7	26	24.34	73692	64371	20873	0	2	Pass1	PepFrag1	None	17728272	IWGNNPEQMAEINEK	IWGNNPEQMAEINEK	30	15	3.96	387	18	18	16	4	828660100	85310	Identified	10585	4.7	b2b3b4b5b6*b15*y2y3y4y5y6y7y8y9y10y10*y11y12y13y14y15	227101	1604	165664406959219	125664406959219	0.3025	Green	9063	17728287	17728293	230380	22292	22292.00	2.01	2
1368	NCDO2118_RS07215	glycerol-3-phosphate dehydrogenase 1505933:1506958 forward MW:37188	Regular	40980190	0	371883992	37	7	26	24.34	73692	64371	20873	0	3	Pass1	PepFrag1	None	18789920	GEIVVVSGPSHAEETIVR	GEIVVVSGPSHAEETIVR	131	18	4.53	386	9	9	2	1	52986330	73367	Identified	4392	4.0	b2b2b4b17y7y8y10y12y14y15	264152	1753	175771143567208	771807623781385	0.1574	Green	8553	18789897	18789916	224806	11596	11596.00	3.00	3
1368	NCDO2118_RS07215	glycerol-3-phosphate dehydrogenase 1505933:1506958 forward MW:37188	Regular	40980190	0	371883992	37	7	26	24.34	73692	64371	20873	0	4	Pass1	PepFrag1	None	14947012	YAQAIFSNDYFR	YAQAIFSNDYFR	165	12	6.67	388	2	2	0	0	6251704	64086		170	2.1	b5y9	289346	1332	146362263555188	106362263555188	0.0395	Green	10984	14946986	14947005	253709	2914	2914.00	2.00	2
1368	NCDO2118_RS07215	glycerol-3-phosphate dehydrogenase 1505933:1506958 forward MW:37188	Regular	40980190	0	371883992	37	7	26	24.34	73692	64371	20873	0	5	Pass1	PepFrag1	None	13666705	NMGMVIEGVSTTK	NMGMVIEGVSTTK	277	13	7.00	385	1	1	0	0	6496163	64252		69	1.6	b5y7	233610	1277	142305023832494	102305023832494	0.0186	Green	7704	13666655	13666678	217234	1373	1373.00	2.00	2
1368	NCDO2118_RS07215	glycerol-3-phosphate dehydrogenase 1505933:1506958 forward MW:37188	Regular	40980190	0	371883992	37	7	26	24.34	73692	64371	20873	0	6	Pass2	PepFrag2	None	6593471	AGDALGR	AGDALGR	261	7	7.00	390	2	2	1	0	6284481	64108		1424	1.9	y6y7	96470	593	853354395412723	130670879082545	0.0528	Green	2421	6593356	6593377	161910	3889	3889.00	1.39	1
1368	NCDO2118_RS07215	glycerol-3-phosphate dehydrogenase 1505933:1506958 forward MW:37188	Regular	40980190	0	371883992	37	7	26	24.34	73692	64371	20873	0	7	Pass2	PepFrag2	None	10785164	AENEFINNK	AENEFINNK	332	9	4.26	389	1	1	0	0	475197	52894		395	1.3	y7y8	156555	967	118225352319487	782253523194874	0.0155	Yellow	7113	10785220	10785249	211638	1145	1145.00	2.00	2
1368	NCDO2118_RS07215	glycerol-3-phosphate dehydrogenase 1505933:1506958 forward MW:37188	Regular	15990920	0	371883992	21	6	26	19.06	37755	27164	11080	1	1	Pass1	PepFrag1	None	17728272	IWGNNPEQMAEINEK	IWGNNPEQMAEINEK	30	15	3.96	910	15	15	6	4	356159500	77555	Identified	8598	4.5	b2b5b5*b8b9b12b15y3y6y8y10y11y12y13y14y15	246141	1604	165664406959219	125664406959219	0.4999	Green	6294	17728263	17728260	230182	18873	18873.00	2.00	2
1368	NCDO2118_RS07215	glycerol-3-phosphate dehydrogenase 1505933:1506958 forward MW:37188	Regular	15990920	0	371883992	21	6	26	19.06	37755	27164	11080	0	2	Pass1	PepFrag1	None	25903372	IAVLGPGSWGTALSQVLNDNGHEVR	IAVLGPGSWGTALSQVLNDNGHEVR	5	25	5.22	911	0	0	0	0	2188257	55440	Missing	41	3.6	y3	321487	2401	216780929567471	104520619711647	0.1723	Yellow	13813	25903290	25903264	321414	6506	6506.00	3.00	3
1368	NCDO2118_RS07215	glycerol-3-phosphate dehydrogenase 1505933:1506958 forward MW:37188	Regular	15990920	0	371883992	21	6	26	19.06	37755	27164	11080	0	3	Pass1	PepFrag1	None	10746088	TGILDIMRR	TGILDIMRR	320	9	10.89	913	0	0	0	0	4977017	59008		308	1.6	y6	198132	1024	122826743797091	828267437970914	0.0473	Green	4702	10746061	10746089	212083	1785	1785.00	2.00	2
1368	NCDO2118_RS07215	glycerol-3-phosphate dehydrogenase 1505933:1506958 forward MW:37188	Regular	15990920	0	371883992	21	6	26	19.06	37755	27164	11080	0	4	Pass2	PepFrag2	None	9185077	TGILDIMR	TGILDIMR	320	8	7.00	912	0	0	0	0	742244	50744		35	2.4	b5	240629	876	110686767625355	706867676253554	0.1647	Yellow	6529	9184972	9185001	232575	6217	6217.00	2.00	2
1368	NCDO2118_RS07215	glycerol-3-phosphate dehydrogenase 1505933:1506958 forward MW:37188	Regular	15990920	0	371883992	21	6	26	19.06	37755	27164	11080	0	5	Pass2	PepFrag2	None	6593471	AGDALGR	AGDALGR	261	7	7.00	915	4	4	1	0	724956	50642		1730	1.8	b6b7y5y7	96633	593	853354395412723	130670879082545	0.0894	Yellow	2033	6593334	6593353	173317	3375	3375.00	1.00	1
1368	NCDO2118_RS07215	glycerol-3-phosphate dehydrogenase 1505933:1506958 forward MW:37188	Regular	15990920	0	371883992	21	6	26	19.06	37755	27164	11080	0	6	Pass2	MissedCleavage	None	19640521	VLYENLDAKTGILDIMR	VLYENLDAKTGILDIMR	311	17	4.31	914	2	2	0	0	3771819	57804		368	1.6	b3y17	328091	1868	183376726366764	143376726366764	0.0265	Green	14229	19640656	19640637	328072	999	999.00	2.00	2
1368	NCDO2118_RS07215	glycerol-3-phosphate dehydrogenase 1505933:1506958 forward MW:37188	Regular	28214940	0	371883992	56	12	26	47.51	113260	72631	30743	1	1	Pass1	PepFrag1	None	14947012	YAQAIFSNDYFR	YAQAIFSNDYFR	165	12	6.67	1777	11	11	7	4	309466300	79411		8891	4.7	b2b3b4b6b10*b11y3y5y6y7y8y9y10y10y11*	285782	1332	146362263555188	106362263555188	0.2375	Green	13917	14946979	14947006	278493	26894	26894.00	2.00	2
1368	NCDO2118_RS07215	glycerol-3-phosphate dehydrogenase 1505933:1506958 forward MW:37188	Regular	28214940	0	371883992	56	12	26	47.51	113260	72631	30743	0	2	Pass1	PepFrag1	None	18950134	NIIAVGAGALHGLGFGDNAK	NIIAVGAGALHGLGFGDNAK	194	20	7.82	1779	9	9	4	2	39640040	70486		6245	5.4	b2b4b13*y3y7y11y11y12y15y16y17y18	337883	1780	17757137968626	783809197908399	0.2077	Green	24889	18950071	18950102	325331	23522	23522.00	2.99	3
1368	NCDO2118_RS07215	glycerol-3-phosphate dehydrogenase 1505933:1506958 forward MW:37188	Regular	28214940	0	371883992	56	12	26	47.51	113260	72631	30743	0	3	Pass1	PepFrag1	None	30585878	LGVAMGAEPLTYSGLSGVGDLIVTGTSIHSR	LGVAMGAEPLTYSGLSGVGDLIVTGTSIHSR	227	31	5.22	1780	16	16	4	1	132573500	75729	Identified	6147	6.2	b3b8b8b11b12b14b21y2y3y6y7y8y13y15y21y23y24y25y27y31	376843	2873	244333707424317	122889138282878	0.1961	Green	36309	30585934	30585875	381671	22215	22215.00	3.02	3
1368	NCDO2118_RS07215	glycerol-3-phosphate dehydrogenase 1505933:1506958 forward MW:37188	Regular	28214940	0	371883992	56	12	26	47.51	113260	72631	30743	0	4	Pass1	PepFrag1	None	9185077	TGILDIMR	TGILDIMR	320	8	7.00	1778	6	6	4	1	106887700	74794		4865	3.6	b3y2y3y4y5y6	247620	876	110686767625355	706867676253554	0.1707	Green	16349	9185034	9185070	289306	19339	19339.00	2.00	2
1368	NCDO2118_RS07215	glycerol-3-phosphate dehydrogenase 1505933:1506958 forward MW:37188	Regular	28214940	0	371883992	56	12	26	47.51	113260	72631	30743	0	5	Pass2	PepFrag2	None	10185779	DITLISAASK	DITLISAASK	149	10	6.78	1781	3	3	0	0	1704019	56820		494	2.2	b3b9y10	231998	971	118551154443402	785511544434018	0.0370	Yellow	8449	10185823	10185859	248970	4189	4189.00	1.87	2
1368	NCDO2118_RS07215	glycerol-3-phosphate dehydrogenase 1505933:1506958 forward MW:37188	Regular	28214940	0	371883992	56	12	26	47.51	113260	72631	30743	0	6	Pass2	PepFrag2	None	17509222	LYTNTDVVGVETAGALK	LYTNTDVVGVETAGALK	177	17	4.07	1782	0	0	0	0	4022990	60550		160	1.8	y13y16	280840	1644	168407272831315	128407272831315	0.0125	Green	20421	17509026	17509042	306600	1416	1416.00	2.00	2
1368	NCDO2118_RS07215	glycerol-3-phosphate dehydrogenase 1505933:1506958 forward MW:37188	Regular	28214940	0	371883992	56	12	26	47.51	113260	72631	30743	0	7	Pass2	PepFrag2	None	35738395	GEIVVVSGPSHAEETIVRDITLISAASKDHDEAK	GEIVVVSGPSHAEETIVRDITLISAASKDHDEAK	131	34	4.48	1788	0	0	0	0	1899616	57291	Missing	235	2.0	y18y21	321422	3335	269871398550477	139914265700318	0.0079	Yellow	37079	35738028	35737904	386148	899	899.00	3.00	3
1368	NCDO2118_RS07215	glycerol-3-phosphate dehydrogenase 1505933:1506958 forward MW:37188	Regular	28214940	0	371883992	56	12	26	47.51	113260	72631	30743	0	8	Pass2	VarMod	Phosphoryl STY(7)	19589583	GEIVVVSGPSHAEETIVR	GEIVVVSGPSHAEETIVR	131	18	4.53	1784	0	0	0	0	3206414	59565	Missing	119	2.0	b7b16-H3PO4y13-H3PO4	289368	1753	175771143567208	135771143567208	0.0161	Green	43794	19589591	19589594	460800	1820	1820.00	2.00	2
1368	NCDO2118_RS07215	glycerol-3-phosphate dehydrogenase 1505933:1506958 forward MW:37188	Regular	28214940	0	371883992	56	12	26	47.51	113260	72631	30743	0	9	Pass2	VarMod	Oxidation M(8);Oxidation M(10)	20680300	LADIEKNMGMVIEGVSTTK	LADIEKNMGMVIEGVSTTK	271	19	4.44	1787	2	2	0	0	2353617	58222		505	1.9	b9b15*b16*y11	292638	1927	187217932097617	147217932097617	0.0122	Yellow	31150	20680254	20680249	355207	1380	1380.00	2.00	2
1368	NCDO2118_RS07215	glycerol-3-phosphate dehydrogenase 1505933:1506958 forward MW:37188	Regular	28214940	0	371883992	56	12	26	47.51	113260	72631	30743	0	10	Pass2	VarMod	Phosphoryl STY(*)	10985442	DITLISAASK	DITLISAASK	149	10	6.78	1785	0	0	0	0	814654	53615		161	1.4	y7y9	231998	971	118551154443402	785511544434018	0.0107	Yellow	29667	10985431	10985466	347939	1209	1209.00	1.64	2
1368	NCDO2118_RS07215	glycerol-3-phosphate dehydrogenase 1505933:1506958 forward MW:37188	Regular	28214940	0	371883992	56	12	26	47.51	113260	72631	30743	0	11	Pass2	VarMod	Phosphoryl STY(10)	19589583	GEIVVVSGPSHAEETIVR	GEIVVVSGPSHAEETIVR	131	18	4.53	1783	3	3	0	0	4676387	61204	Identified	280	1.6	b10-H3PO4b12b15y10y12y13	289368	1753	175771143567208	135771143567208	0.0079	Green	45236	19589568	19589572	487054	899	899.00	2.00	2
1368	NCDO2118_RS07215	glycerol-3-phosphate dehydrogenase 1505933:1506958 forward MW:37188	Regular	28214940	0	371883992	56	12	26	47.51	113260	72631	30743	0	12	Pass2	VarMod	Phosphoryl STY(*)	24072884	LDLALEDVDAILFVVPTKVTR	LDLALEDVDAILFVVPTKVTR	66	21	3.97	1786	2	2	0	0	14188870	66024	Identified	228	1.6	b8y6	433648	2250	207593927887047	983959519246978	0.0074	Green	13627	24072860	24072861	277177	840	840.00	3.00	3
1368	NCDO2118_RS07215	glycerol-3-phosphate dehydrogenase 1505933:1506958 forward MW:37188	Regular	28214940	0	371883992	56	12	26	47.51	113260	72631	30743	0	13	Pass2	InSource	None	6473545	LDIMR	TGILDIMR	323	5	7.00	1778	2	2	0	0	7915160	0.0000		2032	0.0	y3y5	247620	611	870536745914895	134107349182979	0.0589	Green	16343	6473519	6473543	289275	6670	6670.00	1.00	1
1368	NCDO2118_RS07215	glycerol-3-phosphate dehydrogenase 1505933:1506958 forward MW:37188	Regular	28214940	0	371883992	56	12	26	47.51	113260	72631	30743	0	14	Pass2	InSource	None	5342704	DIMR	TGILDIMR	324	4	7.00	1778	2	2	1	0	16286000	0.0000		381	0.0	y3y4	247620	487	748362944351787	109672588870357	0.0174	Green	16348	5342687	5342710	289306	1968	1968.00	1.00	1
1368	NCDO2118_RS07215	glycerol-3-phosphate dehydrogenase 1505933:1506958 forward MW:37188	Regular	7853912	0	371883992	28	10	26	26.39	80658	63934	17179	1	1	Pass1	PepFrag1	None	10645623	VLYENLDAK	VLYENLDAK	311	9	4.07	1098	4	4	1	0	26662450	63210		5851	5.1	b9y3y3y6y8y8y9	204482	992	120254337195495	802543371954953	0.5477	Green	5261	10645549	10645583	203984	44176	44176.00	1.98	2
1368	NCDO2118_RS07215	glycerol-3-phosphate dehydrogenase 1505933:1506958 forward MW:37188	Regular	7853912	0	371883992	28	10	26	26.39	80658	63934	17179	0	2	Pass1	PepFrag1	None	17728272	IWGNNPEQMAEINEK	IWGNNPEQMAEINEK	30	15	3.96	1100	11	11	2	2	143281700	70513	Identified	7215	4.2	b3b5b5*b8*b10b15y4y7y8y9y10y12y13y14*y15	216950	1604	165664406959219	125664406959219	0.1943	Green	7785	17728310	17728306	230827	15668	15668.00	2.00	2
1368	NCDO2118_RS07215	glycerol-3-phosphate dehydrogenase 1505933:1506958 forward MW:37188	Regular	7853912	0	371883992	28	10	26	26.39	80658	63934	17179	0	3	Pass1	PepFrag1	None	18789920	GEIVVVSGPSHAEETIVR	GEIVVVSGPSHAEETIVR	131	18	4.53	1099	2	2	0	0	1637303	51092	Missing	492	2.7	b5y12	261887	1753	175771143567208	771807623781385	0.0507	Yellow	7394	18789836	18789850	226379	4090	4090.00	3.00	3
1368	NCDO2118_RS07215	glycerol-3-phosphate dehydrogenase 1505933:1506958 forward MW:37188	Regular	7853912	0	371883992	28	10	26	26.39	80658	63934	17179	0	4	Pass1	PepFrag1	None	6444090	AAIITR	AAIITR	214	6	11.05	1101	4	4	2	0	33176390	64159		638	1.0	y2y3y4y6	134611	623	881897947754241	136379589550848	0.0101	Green	2957	6444070	6444089	175940	812	812.00	1.00	1
1368	NCDO2118_RS07215	glycerol-3-phosphate dehydrogenase 1505933:1506958 forward MW:37188	Regular	7853912	0	371883992	28	10	26	26.39	80658	63934	17179	0	5	Pass2	PepFrag2	None	7594359	GLAEITR	GLAEITR	220	7	7.00	1106	0	0	0	0	1404004	50425		43	1.7	y5	147626	713	964908178407953	152981635681591	0.0365	Yellow	5851	7594251	7594269	210042	2944	2944.00	1.00	1
1368	NCDO2118_RS07215	glycerol-3-phosphate dehydrogenase 1505933:1506958 forward MW:37188	Regular	7853912	0	371883992	28	10	26	26.39	80658	63934	17179	0	6	Pass2	PepFrag2	None	13666705	NMGMVIEGVSTTK	NMGMVIEGVSTTK	277	13	7.00	1105	1	1	0	0	3271477	54098		411	1.8	y12	232290	1277	142305023832494	102305023832494	0.0238	Yellow	8328	13666397	13666420	237605	1921	1921.00	2.00	2
1368	NCDO2118_RS07215	glycerol-3-phosphate dehydrogenase 1505933:1506958 forward MW:37188	Regular	7853912	0	371883992	28	10	26	26.39	80658	63934	17179	0	7	Pass2	PepFrag2	None	10785164	AENEFINNK	AENEFINNK	332	9	4.26	1107	1	1	0	0	901036	48498		31	1.2	y6	156364	967	118225352319487	782253523194874	0.0107	Yellow	3136	10784962	10784996	178939	862	862.00	2.00	2
1368	NCDO2118_RS07215	glycerol-3-phosphate dehydrogenase 1505933:1506958 forward MW:37188	Regular	7853912	0	371883992	28	10	26	26.39	80658	63934	17179	0	8	Pass2	MissedCleavage	None	14647077	ETRAENEFINNK	ETRAENEFINNK	329	12	4.56	1102	1	1	0	0	1432533	50512		37	1.7	b7	153431	1317	145261375030427	105261375030427	0.0196	Yellow	4359	14646978	14646996	194003	1581	1581.00	2.00	2
1368	NCDO2118_RS07215	glycerol-3-phosphate dehydrogenase 1505933:1506958 forward MW:37188	Regular	7853912	0	371883992	28	10	26	26.39	80658	63934	17179	0	9	Pass2	VarMod	Oxidation M(2)	13826654	NMGMVIEGVSTTK	NMGMVIEGVSTTK	277	13	7.00	1104	2	2	0	0	3626073	54545		2080	2.9	y11y13y13*	232290	1277	142305023832494	102305023832494	0.0856	Yellow	13848	13826583	13826606	337876	6903	6903.00	1.70	2
1368	NCDO2118_RS07215	glycerol-3-phosphate dehydrogenase 1505933:1506958 forward MW:37188	Regular	7853912	0	371883992	28	10	26	26.39	80658	63934	17179	0	10	Pass2	VarMod	Phosphoryl STY(*)	10985442	DITLISAASK	DITLISAASK	149	10	6.78	1103	2	2	0	0	2375006	52708		381	1.6	b4b4b9y5y8-H3PO4y9	210141	971	118551154443402	785511544434018	0.0211	Yellow	5396	10985384	10985417	205634	1701	1701.00	2.00	2
1368	NCDO2118_RS07215	glycerol-3-phosphate dehydrogenase 1505933:1506958 forward MW:37188	Regular	5634970	0.27	371883992	26	7	26	25.81	37735	26417	10820	1	1	Pass1	PepFrag1	None	7864720	QVAEVLK	QVAEVLK	91	7	7.00	3405	5	5	2	1	5623535	55009		4744	2.7	b3b4b5b5*y2y7	148799	759	100597568751794	161195137503589	0.2623	Yellow	2941	7864727	7864747	217064	9898	9898.00	1.00	1
1368	NCDO2118_RS07215	glycerol-3-phosphate dehydrogenase 1505933:1506958 forward MW:37188	Regular	5634970	0.27	371883992	26	7	26	25.81	37735	26417	10820	0	2	Pass1	PepFrag1	None	18950134	NIIAVGAGALHGLGFGDNAK	NIIAVGAGALHGLGFGDNAK	194	20	7.82	3407	2	2	0	0	7527512	56275		1766	3.8	b5*b12*y3*y13y15y17y17*	347586	1780	17757137968626	783809197908399	0.2379	Yellow	20344	18950070	18950100	328124	8977	8977.00	3.00	3
1368	NCDO2118_RS07215	glycerol-3-phosphate dehydrogenase 1505933:1506958 forward MW:37188	Regular	5634970	0.27	371883992	26	7	26	25.81	37735	26417	10820	0	3	Pass1	PepFrag1	None	14947012	YAQAIFSNDYFR	YAQAIFSNDYFR	165	12	6.67	3402	3	3	1	1	52507450	64711		1330	2.9	b5y6y7	280494	1332	146362263555188	106362263555188	0.1999	Green	10679	14947055	14947072	280934	7542	7542.00	2.00	2
1368	NCDO2118_RS07215	glycerol-3-phosphate dehydrogenase 1505933:1506958 forward MW:37188	Regular	5634970	0.27	371883992	26	7	26	25.81	37735	26417	10820	0	4	Pass1	PepFrag1	None	30585878	LGVAMGAEPLTYSGLSGVGDLIVTGTSIHSR	LGVAMGAEPLTYSGLSGVGDLIVTGTSIHSR	227	31	5.22	3403	11	11	3	1	30662970	62375	Identified	2582	4.0	b4b6b11b15b15y6y8y13y23y24y25y26y31	391545	2873	244333707424317	122889138282878	0.1815	Green	30727	30585925	30585851	384128	6849	6849.00	3.03	3
1368	NCDO2118_RS07215	glycerol-3-phosphate dehydrogenase 1505933:1506958 forward MW:37188	Regular	5634970	0.27	371883992	26	7	26	25.81	37735	26417	10820	0	5	Pass1	PepFrag1	None	19711049	LDLALEDVDAILFVVPTK	LDLALEDVDAILFVVPTK	66	18	3.50	3404	3	3	1	0	8281693	56690	Identified	213	1.9	b6b10b11y3y5y6	476200	1904	185725240853721	838168272358139	0.0396	Yellow	36901	19710990	19711016	453310	1496	1496.00	2.58	3
1368	NCDO2118_RS07215	glycerol-3-phosphate dehydrogenase 1505933:1506958 forward MW:37188	Regular	5634970	0.27	371883992	26	7	26	25.81	37735	26417	10820	0	6	Pass2	PepFrag2	None	10185779	DITLISAASK	DITLISAASK	149	10	6.78	3406	1	1	0	0	189784	40292		150	1.3	b2b4b7	222704	971	118551154443402	785511544434018	0.0249	Red	15421	10185673	10185701	307074	938	938.00	2.00	2
1368	NCDO2118_RS07215	glycerol-3-phosphate dehydrogenase 1505933:1506958 forward MW:37188	Regular	5634970	0.27	371883992	26	7	26	25.81	37735	26417	10820	0	7	Pass2	VarMod	Phosphoryl STY(*)	31385541	LGVAMGAEPLTYSGLSGVGDLIVTGTSIHSR	LGVAMGAEPLTYSGLSGVGDLIVTGTSIHSR	227	31	5.22	3408	1	1	0	0	1147306	48106	Missing	35	2.6	b16	391545	2873	244333707424317	122889138282878	0.0539	Red	35493	31385503	31385419	435504	2035	2035.00	3.00	3
1368	NCDO2118_RS07215	glycerol-3-phosphate dehydrogenase 1505933:1506958 forward MW:37188	Regular	1375923	0.41	371883992	8	3	26	2.05	4314	5991	1109	1	1	Pass1	PepFrag1	None	8174302	DVVLDEK	DVVLDEK	53	7	3.70	1407	5	5	2	1	58985400	59093		893	1.5	b3y3y4y5y7	165027	760	100685909104663	161371818209326	0.4629	Yellow	3552	8174284	8174296	152166	1997	1997.00	1.00	1
1368	NCDO2118_RS07215	glycerol-3-phosphate dehydrogenase 1505933:1506958 forward MW:37188	Regular	1375923	0.41	371883992	8	3	26	2.05	4314	5991	1109	0	2	Pass2	PepFrag2	None	14947012	YAQAIFSNDYFR	YAQAIFSNDYFR	165	12	6.67	1409	0	0	0	0	3670268	47033		31	1.6	y9*	297333	1332	146362263555188	106362263555188	0.3484	Red	7096	14946785	14946792	237160	1503	1503.00	2.00	2
1368	NCDO2118_RS07215	glycerol-3-phosphate dehydrogenase 1505933:1506958 forward MW:37188	Regular	1375923	0.41	371883992	8	3	26	2.05	4314	5991	1109	0	3	Pass2	PepFrag2	None	10264963	GLEQGTHER	GLEQGTHER	108	9	5.30	1408	3	3	1	0	1360976	42724		185	1.2	y6y7y9	69824	911	113615753267925	736157532679247	0.1887	Red	1084	10264838	10264857	107668	814	814.00	2.00	2
1368	NCDO2118_RS07215	glycerol-3-phosphate dehydrogenase 1505933:1506958 forward MW:37188	Regular	4803608	0.43	371883992	23	6	26	14.37	45644	38094	7821	1	1	Pass1	PepFrag1	None	10645623	VLYENLDAK	VLYENLDAK	311	9	4.07	1576	3	3	1	0	50153300	63819		3437	4.2	y3y8y9	209094	992	120254337195495	802543371954953	0.5746	Green	7681	10645549	10645576	204185	26229	26229.00	1.97	2
1368	NCDO2118_RS07215	glycerol-3-phosphate dehydrogenase 1505933:1506958 forward MW:37188	Regular	4803608	0.43	371883992	23	6	26	14.37	45644	38094	7821	0	2	Pass1	PepFrag1	None	18789920	GEIVVVSGPSHAEETIVR	GEIVVVSGPSHAEETIVR	131	18	4.53	1574	4	4	1	1	12761600	57875	Missing	1513	3.1	b4y11y12y14	262617	1753	175771143567208	771807623781385	0.1308	Green	9874	18789877	18789888	226898	5968	5968.00	3.00	3
1368	NCDO2118_RS07215	glycerol-3-phosphate dehydrogenase 1505933:1506958 forward MW:37188	Regular	4803608	0.43	371883992	23	6	26	14.37	45644	38094	7821	0	3	Pass1	PepFrag1	None	10785164	AENEFINNK	AENEFINNK	332	9	4.26	1577	1	1	0	0	8650548	56186		45	2.4	y3	166434	967	118225352319487	782253523194874	0.1292	Yellow	7012	10785161	10785188	197428	5897	5897.00	2.00	2
1368	NCDO2118_RS07215	glycerol-3-phosphate dehydrogenase 1505933:1506958 forward MW:37188	Regular	4803608	0.43	371883992	23	6	26	14.37	45644	38094	7821	0	4	Pass1	PepFrag1	None	7864720	QVAEVLK	QVAEVLK	91	7	7.00	1573	9	9	5	3	120695900	67633		1924	2.1	b3b4b4*b5b5*b7y2y3y4y5y7y7*	152608	759	100597568751794	161195137503589	0.1095	Green	2584	7864707	7864724	153090	4998	4998.00	1.00	1
1368	NCDO2118_RS07215	glycerol-3-phosphate dehydrogenase 1505933:1506958 forward MW:37188	Regular	4803608	0.43	371883992	23	6	26	14.37	45644	38094	7821	0	5	Pass2	PepFrag2	None	13666705	NMGMVIEGVSTTK	NMGMVIEGVSTTK	277	13	7.00	1578	3	3	0	0	961053	46643		171	1.4	b2b7y10	226972	1277	142305023832494	102305023832494	0.0184	Red	7762	13666232	13666255	205346	842	842.00	2.00	2
1368	NCDO2118_RS07215	glycerol-3-phosphate dehydrogenase 1505933:1506958 forward MW:37188	Regular	4803608	0.43	371883992	23	6	26	14.37	45644	38094	7821	0	6	Pass2	PepFrag2	None	6883876	LADIEK	LADIEK	271	6	4.07	1575	2	2	0	0	3620341	52403		362	1.0	y4y6	122755	650	907197556834765	141439511366953	0.0172	Yellow	1292	6883931	6883950	129967	784	784.00	1.00	1
1368	NCDO2118_RS07215	glycerol-3-phosphate dehydrogenase 1505933:1506958 forward MW:37188	Regular	4803608	0.43	371883992	23	6	26	14.37	45644	38094	7821	0	7	Pass2	InSource	None	9654938	LYENLDAK	VLYENLDAK	312	8	4.07	1576	1	1	0	0	1582631	0.0000		369	0.0	y8	209094	887	11161144069031	183222881380621	0.0203	Green	7679	9654884	9654896	204143	926	926.00	1.00	1
1368	NCDO2118_RS07215	glycerol-3-phosphate dehydrogenase 1505933:1506958 forward MW:37188	Regular	5831331	0.88	371883992	25	8	26	17.89	76994	34230	23923	1	1	Pass1	PepFrag1	None	10645623	VLYENLDAK	VLYENLDAK	311	9	4.07	1623	1	1	0	0	5140234	54768		138	3.3	y3	199187	992	120254337195495	802543371954953	0.1725	Yellow	9013	10645569	10645601	203186	13283	13283.00	2.00	2
1368	NCDO2118_RS07215	glycerol-3-phosphate dehydrogenase 1505933:1506958 forward MW:37188	Regular	5831331	0.88	371883992	25	8	26	17.89	76994	34230	23923	0	2	Pass1	PepFrag1	None	18789920	GEIVVVSGPSHAEETIVR	GEIVVVSGPSHAEETIVR	131	18	4.53	1622	7	7	5	1	41023610	63788	Missing	5252	4.0	b4y11y12y13y14y15y16	253766	1753	175771143567208	771807623781385	0.1553	Green	11908	18789893	18789921	225685	11956	11956.00	3.00	3
1368	NCDO2118_RS07215	glycerol-3-phosphate dehydrogenase 1505933:1506958 forward MW:37188	Regular	5831331	0.88	371883992	25	8	26	17.89	76994	34230	23923	0	3	Pass1	PepFrag1	None	7864720	QVAEVLK	QVAEVLK	91	7	7.00	1620	9	9	6	3	164548300	69821		3192	2.6	b2b3b3*b4b4*b4b5b6b6*y3y4y5y7y7*	158051	759	100597568751794	161195137503589	0.1168	Green	2951	7864708	7864734	152006	8991	8991.00	1.00	1
1368	NCDO2118_RS07215	glycerol-3-phosphate dehydrogenase 1505933:1506958 forward MW:37188	Regular	5831331	0.88	371883992	25	8	26	17.89	76994	34230	23923	0	4	Pass1	PepFrag1	None	10785164	AENEFINNK	AENEFINNK	332	9	4.26	1621	1	1	0	0	557125	45117		695	2.2	b6y9	163488	967	118225352319487	782253523194874	0.0580	Red	5804	10785052	10785084	178761	4468	4468.00	2.00	2
1368	NCDO2118_RS07215	glycerol-3-phosphate dehydrogenase 1505933:1506958 forward MW:37188	Regular	5831331	0.88	371883992	25	8	26	17.89	76994	34230	23923	0	5	Pass2	PepFrag2	None	6883876	LADIEK	LADIEK	271	6	4.07	1627	3	3	0	0	1885205	50411		12676	3.6	b3b6y6	134139	650	907197556834765	141439511366953	0.3322	Yellow	3670	6883976	6884002	159422	25575	25575.00	1.00	1
1368	NCDO2118_RS07215	glycerol-3-phosphate dehydrogenase 1505933:1506958 forward MW:37188	Regular	5831331	0.88	371883992	25	8	26	17.89	76994	34230	23923	0	6	Pass2	PepFrag2	None	17728272	IWGNNPEQMAEINEK	IWGNNPEQMAEINEK	30	15	3.96	1626	1	1	0	0	530197	44902	Missing	1067	2.5	b12*y15	229037	1604	165664406959219	125664406959219	0.0497	Red	9916	17727685	17727702	210070	3828	3828.00	2.00	2
1368	NCDO2118_RS07215	glycerol-3-phosphate dehydrogenase 1505933:1506958 forward MW:37188	Regular	5831331	0.88	371883992	25	8	26	17.89	76994	34230	23923	0	7	Pass2	PepFrag2	None	14947012	YAQAIFSNDYFR	YAQAIFSNDYFR	165	12	6.67	1625	0	0	0	0	2306674	51288		106	1.5	y6*y7*	259160	1332	146362263555188	106362263555188	0.0164	Yellow	16983	14947265	14947292	287490	1264	1264.00	2.00	2
1368	NCDO2118_RS07215	glycerol-3-phosphate dehydrogenase 1505933:1506958 forward MW:37188	Regular	5831331	0.88	371883992	25	8	26	17.89	76994	34230	23923	0	8	Pass2	MissedCleavage	None	14647077	ETRAENEFINNK	ETRAENEFINNK	329	12	4.56	1624	3	3	0	0	649070	45781		757	2.4	b2b4b10y10*y12*	163425	1317	145261375030427	105261375030427	0.0565	Red	7707	14646901	14646929	193070	4353	4353.00	2.00	2
1368	NCDO2118_RS07215	glycerol-3-phosphate dehydrogenase 1505933:1506958 forward MW:37188	Regular	5831331	0.88	371883992	25	8	26	17.89	76994	34230	23923	0	9	Pass2	NeutralLoss_NH3	None	14476812	ETRAENEFINNK	ETRAENEFINNK	329	12	4.56	1624	0	0	0	0	912085	0.0000		40	0.0	y7*	163425	1317	145261375030427	105261375030427	0.0425	Red	7711	14476749	14476777	193080	3276	3276.00	2.00	2
1368	NCDO2118_RS07215	glycerol-3-phosphate dehydrogenase 1505933:1506958 forward MW:37188	Regular	5923253	0.93	371883992	25	8	26	19.65	57753	29880	8362	1	1	Pass1	PepFrag1	None	10645623	VLYENLDAK	VLYENLDAK	311	9	4.07	1480	1	1	0	0	3145422	52702		545	3.5	b5b6*y3y3y5*y9*	202773	992	120254337195495	802543371954953	0.2883	Yellow	8606	10645579	10645601	204548	16650	16650.00	2.00	2
1368	NCDO2118_RS07215	glycerol-3-phosphate dehydrogenase 1505933:1506958 forward MW:37188	Regular	5923253	0.93	371883992	25	8	26	19.65	57753	29880	8362	0	2	Pass1	PepFrag1	None	7864720	QVAEVLK	QVAEVLK	91	7	7.00	1476	8	8	5	3	192288300	70565		2660	2.4	b3b4b4*b4b5b5*b5y2y3y4y5y7y7*	159239	759	100597568751794	161195137503589	0.1287	Green	3000	7864714	7864731	153039	7430	7430.00	1.00	1
1368	NCDO2118_RS07215	glycerol-3-phosphate dehydrogenase 1505933:1506958 forward MW:37188	Regular	5923253	0.93	371883992	25	8	26	19.65	57753	29880	8362	0	3	Pass1	PepFrag1	None	18789920	GEIVVVSGPSHAEETIVR	GEIVVVSGPSHAEETIVR	131	18	4.53	1477	8	8	4	1	29786470	62466	Missing	3504	3.1	b4b9y6y11y12y13y14y15y15	262034	1753	175771143567208	771807623781385	0.1004	Green	11168	18789880	18789890	227766	5800	5800.00	3.00	3
1368	NCDO2118_RS07215	glycerol-3-phosphate dehydrogenase 1505933:1506958 forward MW:37188	Regular	5923253	0.93	371883992	25	8	26	19.65	57753	29880	8362	0	4	Pass2	PepFrag2	None	13666705	NMGMVIEGVSTTK	NMGMVIEGVSTTK	277	13	7.00	1479	0	0	0	0	1121061	48222		126	1.5	b11	234962	1277	142305023832494	102305023832494	0.0207	Red	10266	13666517	13666529	219986	1198	1198.00	2.00	2
1368	NCDO2118_RS07215	glycerol-3-phosphate dehydrogenase 1505933:1506958 forward MW:37188	Regular	5923253	0.93	371883992	25	8	26	19.65	57753	29880	8362	0	5	Pass2	PepFrag2	None	14947012	YAQAIFSNDYFR	YAQAIFSNDYFR	165	12	6.67	1478	3	3	0	0	7897650	56701		362	1.5	b2b11b11y5y7*y7y8	279503	1332	146362263555188	106362263555188	0.0196	Green	15859	14947197	14947202	284154	1132	1132.00	2.00	2
1368	NCDO2118_RS07215	glycerol-3-phosphate dehydrogenase 1505933:1506958 forward MW:37188	Regular	5923253	0.93	371883992	25	8	26	19.65	57753	29880	8362	0	6	Pass2	MissedCleavage	None	10586092	DVVLDEKIK	DVVLDEKIK	53	9	4.31	1481	4	4	1	1	6767545	56030		1027	3.9	b7b8y1y9	193476	1019	122426591069237	824265910692372	0.3808	Yellow	9802	10586081	10586104	215762	21994	21994.00	1.98	2
1368	NCDO2118_RS07215	glycerol-3-phosphate dehydrogenase 1505933:1506958 forward MW:37188	Regular	5923253	0.93	371883992	25	8	26	19.65	57753	29880	8362	0	7	Pass2	MissedCleavage	None	14647077	ETRAENEFINNK	ETRAENEFINNK	329	12	4.56	1483	0	0	0	0	2530878	51758		70	2.0	y3*y9*	157955	1317	145261375030427	105261375030427	0.0449	Yellow	6004	14647050	14647057	182362	2592	2592.00	2.00	2
1368	NCDO2118_RS07215	glycerol-3-phosphate dehydrogenase 1505933:1506958 forward MW:37188	Regular	5923253	0.93	371883992	25	8	26	19.65	57753	29880	8362	0	8	Pass2	MissedCleavage	None	11155705	NWRAGDALGR	NWRAGDALGR	258	10	10.89	1482	1	1	0	0	1556597	49647		68	1.3	b5*b9	146120	1000	120.9	80.9	0.0166	Red	2516	11155660	11155682	146474	957	957.00	2.00	2
1368	NCDO2118_RS07215	glycerol-3-phosphate dehydrogenase 1505933:1506958 forward MW:37188	Regular	2132483	1.29	371883992	12	7	26	11.73	20215	6468	4699	1	1	Pass1	PepFrag1	None	17728272	IWGNNPEQMAEINEK	IWGNNPEQMAEINEK	30	15	3.96	1907	5	5	0	1	36433230	58904	Identified	2057	2.5	b5b7y7y10y13y15	247190	1604	165664406959219	125664406959219	0.1967	Green	5247	17728308	17728301	230385	3977	3977.00	2.00	2
1368	NCDO2118_RS07215	glycerol-3-phosphate dehydrogenase 1505933:1506958 forward MW:37188	Regular	2132483	1.29	371883992	12	7	26	11.73	20215	6468	4699	0	2	Pass1	PepFrag1	None	10645623	VLYENLDAK	VLYENLDAK	311	9	4.07	1909	2	2	1	0	14152750	54797		358	1.5	b7y7y8	209966	992	120254337195495	802543371954953	0.0798	Yellow	3347	10645562	10645587	203672	1613	1613.00	2.00	2
1368	NCDO2118_RS07215	glycerol-3-phosphate dehydrogenase 1505933:1506958 forward MW:37188	Regular	2132483	1.29	371883992	12	7	26	11.73	20215	6468	4699	0	3	Pass1	PepFrag1	None	17138654	DITLISAASKDHDEAK	DITLISAASKDHDEAK	149	16	4.44	1908	1	1	0	0	510748	40371		209	1.5	b11	206359	1582	164146119524019	124146119524019	0.0434	Red	8982	17138553	17138550	279780	878	878.00	2.00	2
1368	NCDO2118_RS07215	glycerol-3-phosphate dehydrogenase 1505933:1506958 forward MW:37188	Regular	2132483	1.29	371883992	12	7	26	11.73	20215	6468	4699	0	4	Pass2	PepFrag2	None	13666705	NMGMVIEGVSTTK	NMGMVIEGVSTTK	277	13	7.00	1912	0	0	0	0	2542882	47342		368	2.9	b8y7	231201	1277	142305023832494	548700158883291	0.3452	Red	4757	13666410	13666440	223940	6978	6978.00	2.61	3
1368	NCDO2118_RS07215	glycerol-3-phosphate dehydrogenase 1505933:1506958 forward MW:37188	Regular	2132483	1.29	371883992	12	7	26	11.73	20215	6468	4699	0	5	Pass2	PepFrag2	None	6593471	AGDALGR	AGDALGR	261	7	7.00	1913	3	3	0	0	908361	42871		787	1.3	b6y5y7	104158	593	853354395412723	130670879082545	0.0661	Red	1731	6593361	6593379	173416	1337	1337.00	1.00	1
1368	NCDO2118_RS07215	glycerol-3-phosphate dehydrogenase 1505933:1506958 forward MW:37188	Regular	2132483	1.29	371883992	12	7	26	11.73	20215	6468	4699	0	6	Pass2	PepFrag2	None	10785164	AENEFINNK	AENEFINNK	332	9	4.26	1910	0	0	0	0	635065	41317		45	1.2	y5*	172430	967	118225352319487	782253523194874	0.0461	Red	3855	10785229	10785253	211584	932	932.00	2.00	2
1368	NCDO2118_RS07215	glycerol-3-phosphate dehydrogenase 1505933:1506958 forward MW:37188	Regular	2132483	1.29	371883992	12	7	26	11.73	20215	6468	4699	0	7	Pass2	MissedCleavage	None	19640521	VLYENLDAKTGILDIMR	VLYENLDAKTGILDIMR	311	17	4.31	1911	1	1	0	0	1582826	45283		875	2.8	b8*y17	318642	1868	183376726366764	143376726366764	0.2226	Red	9240	19640539	19640516	283814	4500	4500.00	2.29	2
1369	NCDO2118_RS07220	UTP--glucose-1-phosphate uridylyltransferase 1507001:1507942 forward MW:34834	Regular	5762070	0	348340308	8	4	23	13.10	47062	9378	3793	1	1	Pass1	PepFrag1	None	10256102	AVIPAAGLGTR	AVIPAAGLGTR	15	11	11.05	413	5	5	3	0	37893540	63391	Identified	1655	2.4	b2y4y5y6y7y8	217885	981	119363709156196	793637091561962	0.1002	Yellow	5000	10256077	10256098	208822	4714	4714.00	2.00	2
1369	NCDO2118_RS07220	UTP--glucose-1-phosphate uridylyltransferase 1507001:1507942 forward MW:34834	Regular	5762070	0	348340308	8	4	23	13.10	47062	9378	3793	0	2	Pass1	PepFrag1	None	33447260	YLLTPEIFDVLETQVPGAGNEIQLTDAIER	YLLTPEIFDVLETQVPGAGNEIQLTDAIER	218	30	3.43	414	1	1	0	0	42502340	63890	Identified	238	2.3	y15	438983	3133	258860963975681	132573975983787	0.0327	Yellow	8800	33447394	33447246	460305	1538	1538.00	3.00	3
1369	NCDO2118_RS07220	UTP--glucose-1-phosphate uridylyltransferase 1507001:1507942 forward MW:34834	Regular	5762070	0	348340308	8	4	23	13.10	47062	9378	3793	0	3	Pass2	PepFrag2	None	12776372	YGVIDPNGEVSK	YGVIDPNGEVSK	180	12	4.07	416	1	1	0	0	2335000	51289	Identified	60	5.1	b5	163144	1165	13385776963791	938577696379104	0.7399	Red	3725	12775829	12775842	163479	34823	34823.00	1.98	2
1369	NCDO2118_RS07220	UTP--glucose-1-phosphate uridylyltransferase 1507001:1507942 forward MW:34834	Regular	5762070	0	348340308	8	4	23	13.10	47062	9378	3793	0	4	Pass2	PepFrag2	None	26965307	AIAKEMLPIVDKPTIQFIVEEALK	AIAKEMLPIVDKPTIQFIVEEALK	32	24	4.65	415	0	0	0	0	3483693	53026	Missing	705	3.1	b24y9*y10*y10	459600	2624	230004070135665	11333604675711	0.0932	Red	9353	26964516	26964469	507071	4384	4384.00	2.73	3
1369	NCDO2118_RS07220	UTP--glucose-1-phosphate uridylyltransferase 1507001:1507942 forward MW:34834	Regular	5762070	0	348340308	8	4	23	13.10	47062	9378	3793	0	5	Pass2	InSource	None	7424206	PAAGLGTR	AVIPAAGLGTR	18	8	11.05	413	1	1	0	0	3491367	0.0000	Identified	1135	0.0	y8	217885	685	939478145556335	147895629111267	0.0341	Yellow	5004	7424208	7424223	208913	1603	1603.00	1.00	1
1369	NCDO2118_RS07220	UTP--glucose-1-phosphate uridylyltransferase 1507001:1507942 forward MW:34834	Regular	7775772	0	348340308	23	7	23	19.49	50869	38640	18646	1	1	Pass1	PepFrag1	None	10256102	AVIPAAGLGTR	AVIPAAGLGTR	15	11	11.05	1625	8	8	5	2	199411600	71905	Identified	16782	4.9	b2b3y5y6y7y8y9y11	197001	981	119363709156196	793637091561962	0.6357	Green	5234	10256054	10256082	206665	32338	32338.00	1.94	2
1369	NCDO2118_RS07220	UTP--glucose-1-phosphate uridylyltransferase 1507001:1507942 forward MW:34834	Regular	7775772	0	348340308	23	7	23	19.49	50869	38640	18646	0	2	Pass1	PepFrag1	None	9935840	GLGHAVLQAK	GLGHAVLQAK	116	10	10.10	1627	1	1	0	0	2638927	53122		74	2.0	y6	162317	950	116835647850589	768356478505889	0.0646	Yellow	1919	9935798	9935827	161220	3288	3288.00	2.00	2
1369	NCDO2118_RS07220	UTP--glucose-1-phosphate uridylyltransferase 1507001:1507942 forward MW:34834	Regular	7775772	0	348340308	23	7	23	19.49	50869	38640	18646	0	3	Pass1	PepFrag1	None	10355258	VFAHEFTGK	VFAHEFTGK	254	9	7.82	1624	3	3	1	0	6656936	57140		616	1.9	b5b5y7y8y9	176325	945	116425337760286	764253377602863	0.0593	Green	2349	10355181	10355208	169273	3014	3014.00	2.00	2
1369	NCDO2118_RS07220	UTP--glucose-1-phosphate uridylyltransferase 1507001:1507942 forward MW:34834	Regular	7775772	0	348340308	23	7	23	19.49	50869	38640	18646	0	4	Pass1	PepFrag1	None	20700866	FVEKPNVDEAPSDLAIIGR	FVEKPNVDEAPSDLAIIGR	199	19	4.06	1626	4	4	1	0	6152842	56798	Identified	626	2.3	b7b8b8*b10y14y17	287577	1931	187476922890483	849846152603218	0.0468	Green	11313	20700888	20700908	266827	2383	2383.00	2.87	3
1369	NCDO2118_RS07220	UTP--glucose-1-phosphate uridylyltransferase 1507001:1507942 forward MW:34834	Regular	7775772	0	348340308	23	7	23	19.49	50869	38640	18646	0	5	Pass1	PepFrag1	None	12776372	YGVIDPNGEVSK	YGVIDPNGEVSK	180	12	4.07	1628	3	3	1	0	2277024	52481	Identified	288	1.3	b2b5b10b11y9*	201272	1165	13385776963791	938577696379104	0.0170	Yellow	6031	12776320	12776340	215245	866	866.00	2.00	2
1369	NCDO2118_RS07220	UTP--glucose-1-phosphate uridylyltransferase 1507001:1507942 forward MW:34834	Regular	7775772	0	348340308	23	7	23	19.49	50869	38640	18646	0	6	Pass2	PepFrag2	None	11916269	VFAHEFTGKR	VFAHEFTGKR	254	10	10.12	1630	1	1	0	0	975848	48801		117	2.8	b5b6	137044	1093	128284172023191	882841720231909	0.1507	Red	2573	11916020	11916043	173514	7667	7667.00	2.00	2
1369	NCDO2118_RS07220	UTP--glucose-1-phosphate uridylyltransferase 1507001:1507942 forward MW:34834	Regular	7775772	0	348340308	23	7	23	19.49	50869	38640	18646	0	7	Pass2	VarMod	Phosphoryl STY(12)	21500529	FVEKPNVDEAPSDLAIIGR	FVEKPNVDEAPSDLAIIGR	199	19	4.06	1629	3	3	0	0	3027390	53718	Identified	143	1.8	y3y9y12	287577	1931	187476922890483	849846152603218	0.0258	Yellow	15597	21500656	21500669	313183	1313	1313.00	3.00	3
1369	NCDO2118_RS07220	UTP--glucose-1-phosphate uridylyltransferase 1507001:1507942 forward MW:34834	Regular	127852200	0	348340308	89	11	23	58.15	326317	246274	131048	1	1	Pass1	PepFrag1	None	33447260	YLLTPEIFDVLETQVPGAGNEIQLTDAIER	YLLTPEIFDVLETQVPGAGNEIQLTDAIER	218	30	3.43	300	32	32	23	8	1116143000	91544	Identified	76869	12.1	b2b3b4b4b7b8b9b10b11b12b12b13b13b14b15b15*b15b16b24b25y2y3y4y5y6y6y7y8y9y9y11y12y14y15y15*y15y16y17y18y20y21*y26y29*y30	471695	3133	258860963975681	132573975983787	0.4489	Green	47010	33447453	33447353	457206	146468	146468.00	3.06	3
1369	NCDO2118_RS07220	UTP--glucose-1-phosphate uridylyltransferase 1507001:1507942 forward MW:34834	Regular	127852200	0	348340308	89	11	23	58.15	326317	246274	131048	0	2	Pass1	PepFrag1	None	23132774	EMLPIVDKPTIQFIVEEALK	EMLPIVDKPTIQFIVEEALK	36	20	4.16	299	10	10	4	2	94960900	80843	Identified	25539	7.1	b2b3b3b4b5b12*b13b13b14b20y8y12y13y14y17y18y20	431846	2231	206423599951444	976157333009627	0.1565	Green	45176	23132725	23132724	438115	51064	51064.00	2.92	3
1369	NCDO2118_RS07220	UTP--glucose-1-phosphate uridylyltransferase 1507001:1507942 forward MW:34834	Regular	127852200	0	348340308	89	11	23	58.15	326317	246274	131048	0	3	Pass1	PepFrag1	None	24292711	LGFVETTIEYGLEHPQIGANLK	LGFVETTIEYGLEHPQIGANLK	270	22	4.53	298	12	12	4	1	43900620	77492	Identified	9780	7.3	b3b4b7b11b12b13b14b18b22b22y5y9*y11y13y14y15y15y16*y19y19	366715	2278	20931263614031	995417574268731	0.1494	Green	35388	24292739	24292729	365239	48742	48742.00	2.99	3
1369	NCDO2118_RS07220	UTP--glucose-1-phosphate uridylyltransferase 1507001:1507942 forward MW:34834	Regular	127852200	0	348340308	89	11	23	58.15	326317	246274	131048	0	4	Pass1	PepFrag1	None	30224900	AFVGNEPFVVMLGDDLMNITGNETPLTK	AFVGNEPFVVMLGDDLMNITGNETPLTK	126	28	3.59	301	18	18	7	2	106357400	81335	Identified	11368	6.5	b3b5b6b8*b8b9*b11*b12b14*b15b16b19b19b28y2y4y5y6y8y8*y9y10y10y11y12y13y16*y18y22y28	455390	2822	241433561256485	120955707504323	0.0870	Green	49215	30225007	30224944	488200	28378	28378.00	2.83	3
1369	NCDO2118_RS07220	UTP--glucose-1-phosphate uridylyltransferase 1507001:1507942 forward MW:34834	Regular	127852200	0	348340308	89	11	23	58.15	326317	246274	131048	0	5	Pass1	PepFrag1	None	10256102	AVIPAAGLGTR	AVIPAAGLGTR	15	11	11.05	297	3	3	0	0	19458770	73958	Identified	960	2.2	b2y6y8	187266	981	119363709156196	793637091561962	0.0116	Green	2224	10255997	10256021	194374	3787	3787.00	2.00	2
1369	NCDO2118_RS07220	UTP--glucose-1-phosphate uridylyltransferase 1507001:1507942 forward MW:34834	Regular	127852200	0	348340308	89	11	23	58.15	326317	246274	131048	0	6	Pass1	PepFrag1	None	10355258	VFAHEFTGK	VFAHEFTGK	254	9	7.82	305	6	6	4	0	16892140	73344		784	1.9	b7y5y6y7y8y9	148212	945	116425337760286	764253377602863	0.0090	Green	292	10355197	10355220	45733	2951	2951.00	2.00	2
1369	NCDO2118_RS07220	UTP--glucose-1-phosphate uridylyltransferase 1507001:1507942 forward MW:34834	Regular	127852200	0	348340308	89	11	23	58.15	326317	246274	131048	0	7	Pass1	PepFrag1	None	40129558	AFVGNEPFVVMLGDDLMNITGNETPLTKDLINDYEK	AFVGNEPFVVMLGDDLMNITGNETPLTKDLINDYEK	126	36	3.63	302	0	0	0	0	3106206	65989	Missing	293	2.5	b7*y13*y16*y17y28	454600	3733	29093655642459	15395770428306	0.0048	Green	50458	40130087	40129891	508815	1554	1554.00	3.35	3
1369	NCDO2118_RS07220	UTP--glucose-1-phosphate uridylyltransferase 1507001:1507942 forward MW:34834	Regular	127852200	0	348340308	89	11	23	58.15	326317	246274	131048	0	8	Pass2	PepFrag2	None	26383471	AKRPIEDHFDSNIELEQNLLEK	AKRPIEDHFDSNIELEQNLLEK	68	22	4.43	307	3	3	0	0	2078349	64244	Missing	4094	6.1	b14y7*y12y14y22	363787	2445	219421346844165	10628089789611	0.0945	Green	42717	26382522	26382496	414247	30843	30843.00	2.63	3
1369	NCDO2118_RS07220	UTP--glucose-1-phosphate uridylyltransferase 1507001:1507942 forward MW:34834	Regular	127852200	0	348340308	89	11	23	58.15	326317	246274	131048	0	9	Pass2	PepFrag2	None	20700866	FVEKPNVDEAPSDLAIIGR	FVEKPNVDEAPSDLAIIGR	199	19	4.06	304	4	4	1	1	6251975	69027	Identified	1021	1.8	b6b7*b10b11b15y9y18*	295357	1931	187476922890483	849846152603218	0.0036	Green	10649	20700677	20700690	259966	1170	1170.00	3.00	3
1369	NCDO2118_RS07220	UTP--glucose-1-phosphate uridylyltransferase 1507001:1507942 forward MW:34834	Regular	127852200	0	348340308	89	11	23	58.15	326317	246274	131048	0	10	Pass2	PepFrag2	None	12776372	YGVIDPNGEVSK	YGVIDPNGEVSK	180	12	4.07	303	0	0	0	0	4000688	67088	Missing	101	1.5	b7*y8*y10	180161	1165	13385776963791	938577696379104	0.0034	Green	2504	12776228	12776248	198826	1109	1109.00	2.00	2
1369	NCDO2118_RS07220	UTP--glucose-1-phosphate uridylyltransferase 1507001:1507942 forward MW:34834	Regular	127852200	0	348340308	89	11	23	58.15	326317	246274	131048	0	11	Pass2	MissedCleavage	None	11537052	KAVIPAAGLGTR	KAVIPAAGLGTR	14	12	11.49	306	1	1	0	0	394609	57029	Missing	239	3.3	y5	337236	1116	130077574610854	90077574610854	0.0314	Yellow	19716	11536926	11536948	299849	10251	10251.00	2.00	2
1369	NCDO2118_RS07220	UTP--glucose-1-phosphate uridylyltransferase 1507001:1507942 forward MW:34834	Regular	13173520	0	348340308	15	4	23	23.32	16781	11332	6382	1	1	Pass1	PepFrag1	None	10256102	AVIPAAGLGTR	AVIPAAGLGTR	15	11	11.05	380	6	6	4	1	66224310	69407	Identified	2566	2.9	b2y4y5y6y7y8y9	198262	981	119363709156196	793637091561962	0.4558	Green	4820	10256090	10256107	209721	7648	7648.00	2.00	2
1369	NCDO2118_RS07220	UTP--glucose-1-phosphate uridylyltransferase 1507001:1507942 forward MW:34834	Regular	13173520	0	348340308	15	4	23	23.32	16781	11332	6382	0	2	Pass1	PepFrag1	None	33447260	YLLTPEIFDVLETQVPGAGNEIQLTDAIER	YLLTPEIFDVLETQVPGAGNEIQLTDAIER	218	30	3.43	382	4	4	0	1	96588690	71046	Identified	892	2.6	b15y10y12y15	451699	3133	258860963975681	132573975983787	0.1293	Green	9691	33447353	33447274	459792	2169	2169.00	3.00	3
1369	NCDO2118_RS07220	UTP--glucose-1-phosphate uridylyltransferase 1507001:1507942 forward MW:34834	Regular	13173520	0	348340308	15	4	23	23.32	16781	11332	6382	0	3	Pass1	PepFrag1	None	23132774	EMLPIVDKPTIQFIVEEALK	EMLPIVDKPTIQFIVEEALK	36	20	4.16	381	1	1	0	0	23834320	64969	Identified	371	2.0	y17	426287	2231	206423599951444	976157333009627	0.0903	Green	9472	23132776	23132766	444275	1515	1515.00	3.00	3
1369	NCDO2118_RS07220	UTP--glucose-1-phosphate uridylyltransferase 1507001:1507942 forward MW:34834	Regular	13173520	0	348340308	15	4	23	23.32	16781	11332	6382	0	4	Pass2	PepFrag2	None	12776372	YGVIDPNGEVSK	YGVIDPNGEVSK	180	12	4.07	383	1	1	0	0	1708230	53522	Missing	276	1.4	b9y12	178497	1165	13385776963791	938577696379104	0.0560	Yellow	1937	12775942	12775953	134229	940	940.00	2.00	2
1369	NCDO2118_RS07220	UTP--glucose-1-phosphate uridylyltransferase 1507001:1507942 forward MW:34834	Regular	13173520	0	348340308	15	4	23	23.32	16781	11332	6382	0	5	Pass2	InSource	None	7424206	PAAGLGTR	AVIPAAGLGTR	18	8	11.05	380	3	3	2	0	9908757	0.0000	Identified	2277	0.0	y6y7y8	198262	685	939478145556335	147895629111267	0.2687	Green	4821	7424183	7424203	209763	4509	4509.00	1.30	1
1369	NCDO2118_RS07220	UTP--glucose-1-phosphate uridylyltransferase 1507001:1507942 forward MW:34834	Regular	10115970	0	348340308	19	7	23	35.46	26451	12765	8556	1	1	Pass1	PepFrag1	None	33447260	YLLTPEIFDVLETQVPGAGNEIQLTDAIER	YLLTPEIFDVLETQVPGAGNEIQLTDAIER	218	30	3.43	885	6	6	1	1	87343800	69462	Identified	3136	3.9	b4b6b10b13b15y3y8*y9y15y16	466791	3133	258860963975681	132573975983787	0.2412	Green	25426	33447315	33447249	457935	6380	6380.00	3.06	3
1369	NCDO2118_RS07220	UTP--glucose-1-phosphate uridylyltransferase 1507001:1507942 forward MW:34834	Regular	10115970	0	348340308	19	7	23	35.46	26451	12765	8556	0	2	Pass1	PepFrag1	None	23132774	EMLPIVDKPTIQFIVEEALK	EMLPIVDKPTIQFIVEEALK	36	20	4.16	884	3	3	0	0	17896400	62578	Identified	1699	2.9	b2b7b13y7y17	427053	2231	206423599951444	976157333009627	0.1593	Green	24329	23132863	23132867	438763	4213	4213.00	3.00	3
1369	NCDO2118_RS07220	UTP--glucose-1-phosphate uridylyltransferase 1507001:1507942 forward MW:34834	Regular	10115970	0	348340308	19	7	23	35.46	26451	12765	8556	0	3	Pass1	PepFrag1	None	24292711	LGFVETTIEYGLEHPQIGANLK	LGFVETTIEYGLEHPQIGANLK	270	22	4.53	883	2	2	0	0	5359903	57342	Missing	285	2.3	b3b11b21*y13*	373835	2278	20931263614031	995417574268731	0.0821	Green	17488	24292702	24292700	365632	2172	2172.00	3.00	3
1369	NCDO2118_RS07220	UTP--glucose-1-phosphate uridylyltransferase 1507001:1507942 forward MW:34834	Regular	10115970	0	348340308	19	7	23	35.46	26451	12765	8556	0	4	Pass1	PepFrag1	None	30224900	AFVGNEPFVVMLGDDLMNITGNETPLTK	AFVGNEPFVVMLGDDLMNITGNETPLTK	126	28	3.59	886	4	4	1	0	2057938	53184	Missing	536	2.2	b10b11y9y11y14y28*	458157	2822	241433561256485	120955707504323	0.0517	Yellow	26552	30225155	30225116	488045	1368	1368.00	3.00	3
1369	NCDO2118_RS07220	UTP--glucose-1-phosphate uridylyltransferase 1507001:1507942 forward MW:34834	Regular	10115970	0	348340308	19	7	23	35.46	26451	12765	8556	0	5	Pass2	PepFrag2	None	10256102	AVIPAAGLGTR	AVIPAAGLGTR	15	11	11.05	889	2	2	0	0	1137758	50611	Missing	194	1.7	y4y9	205881	981	119363709156196	793637091561962	0.0665	Yellow	6441	10255751	10255777	274030	1759	1759.00	2.00	2
1369	NCDO2118_RS07220	UTP--glucose-1-phosphate uridylyltransferase 1507001:1507942 forward MW:34834	Regular	10115970	0	348340308	19	7	23	35.46	26451	12765	8556	0	6	Pass2	VarMod	Phosphoryl STY(16)	23571649	LVEETTDINLHFIRQSHPK	LVEETTDINLHFIRQSHPK	97	19	6.03	888	1	1	0	0	728652	48675	Missing	2469	3.4	b5b6b9*b15*y6-H3PO4y8y14*y15-H3PO4y18-H3PO4	238405	2123	199706850961754	159706850961754	0.2741	Red	24669	23571683	23571651	444551	7249	7249.00	2.45	2
1369	NCDO2118_RS07220	UTP--glucose-1-phosphate uridylyltransferase 1507001:1507942 forward MW:34834	Regular	10115970	0	348340308	19	7	23	35.46	26451	12765	8556	0	7	Pass2	VarMod	Phosphoryl STY(10)	13246759	SGIEDILIVTGK	SGIEDILIVTGK	56	12	4.07	887	1	1	0	0	791584	49035		237	2.2	y9y10y11	314519	1198	136373769893458	963737698934584	0.1251	Red	10189	13246715	13246737	309613	3310	3310.00	2.00	2
1369	NCDO2118_RS07220	UTP--glucose-1-phosphate uridylyltransferase 1507001:1507942 forward MW:34834	Regular	8145876	0	348340308	42	8	23	27.80	104759	52338	46995	1	1	Pass1	PepFrag1	None	10256102	AVIPAAGLGTR	AVIPAAGLGTR	15	11	11.05	2111	8	8	5	2	172403400	71475	Identified	21211	5.2	b2b3y5y6y7y8y9y11	196733	981	119363709156196	793637091561962	0.3654	Green	4810	10256020	10256047	206368	38274	38274.00	1.91	2
1369	NCDO2118_RS07220	UTP--glucose-1-phosphate uridylyltransferase 1507001:1507942 forward MW:34834	Regular	8145876	0	348340308	42	8	23	27.80	104759	52338	46995	0	2	Pass1	PepFrag1	None	10355258	VFAHEFTGK	VFAHEFTGK	254	9	7.82	2110	4	4	0	1	8781755	58545		1259	2.6	b2y4y7y9	175091	945	116425337760286	764253377602863	0.0679	Green	1741	10355184	10355212	167219	7115	7115.00	2.00	2
1369	NCDO2118_RS07220	UTP--glucose-1-phosphate uridylyltransferase 1507001:1507942 forward MW:34834	Regular	8145876	0	348340308	42	8	23	27.80	104759	52338	46995	0	3	Pass1	PepFrag1	None	10585663	THASTIAVMK	THASTIAVMK	162	10	10.10	2108	7	7	3	1	23485520	62817		1840	2.7	b2b7b8b10y8y9y10	161861	999	120819386560693	808193865606928	0.0663	Green	1119	10585622	10585650	153357	6949	6949.00	2.00	2
1369	NCDO2118_RS07220	UTP--glucose-1-phosphate uridylyltransferase 1507001:1507942 forward MW:34834	Regular	8145876	0	348340308	42	8	23	27.80	104759	52338	46995	0	4	Pass1	PepFrag1	None	9935840	GLGHAVLQAK	GLGHAVLQAK	116	10	10.10	2109	7	7	2	2	20634950	62255		675	2.4	b4b6y2y3y4y6y10	163946	950	116835647850589	768356478505889	0.0494	Green	1265	9935772	9935800	158053	5177	5177.00	2.00	2
1369	NCDO2118_RS07220	UTP--glucose-1-phosphate uridylyltransferase 1507001:1507942 forward MW:34834	Regular	8145876	0	348340308	42	8	23	27.80	104759	52338	46995	0	5	Pass1	PepFrag1	None	20700866	FVEKPNVDEAPSDLAIIGR	FVEKPNVDEAPSDLAIIGR	199	19	4.06	2112	2	2	1	0	4539913	55680	Identified	412	1.9	b4b9b10	281298	1931	187476922890483	849846152603218	0.0147	Yellow	11357	20700933	20700958	265953	1537	1537.00	3.00	3
1369	NCDO2118_RS07220	UTP--glucose-1-phosphate uridylyltransferase 1507001:1507942 forward MW:34834	Regular	8145876	0	348340308	42	8	23	27.80	104759	52338	46995	0	6	Pass2	PepFrag2	None	23132774	EMLPIVDKPTIQFIVEEALK	EMLPIVDKPTIQFIVEEALK	36	20	4.16	2114	1	1	0	0	1613471	51187	Missing	32	2.2	b7	402992	2231	206423599951444	976157333009627	0.0183	Yellow	20993	23131973	23131983	392327	1919	1919.00	3.00	3
1369	NCDO2118_RS07220	UTP--glucose-1-phosphate uridylyltransferase 1507001:1507942 forward MW:34834	Regular	8145876	0	348340308	42	8	23	27.80	104759	52338	46995	0	7	Pass2	PepFrag2	None	12447096	SGIEDILIVTGK	SGIEDILIVTGK	56	12	4.07	2115	0	0	0	0	1204492	49917		122	1.4	b4b6y9	291480	1198	136373769893458	963737698934584	0.0086	Red	11507	12447468	12447492	267530	896	896.00	2.00	2
1369	NCDO2118_RS07220	UTP--glucose-1-phosphate uridylyltransferase 1507001:1507942 forward MW:34834	Regular	8145876	0	348340308	42	8	23	27.80	104759	52338	46995	0	8	Pass2	VarMod	Oxidation M(9)	19799855	THASTIAVMKVPHDDVDK	THASTIAVMKVPHDDVDK	162	18	6.02	2113	2	2	0	0	9672994	58965	Identified	1571	2.3	b6y7y18	209232	1825	180551685367534	803677902450226	0.0243	Green	17903	19799942	19799972	335244	2549	2549.00	2.59	3
1369	NCDO2118_RS07220	UTP--glucose-1-phosphate uridylyltransferase 1507001:1507942 forward MW:34834	Regular	8145876	0	348340308	42	8	23	27.80	104759	52338	46995	0	9	Pass2	InSource	None	7424206	PAAGLGTR	AVIPAAGLGTR	18	8	11.05	2111	11	11	5	2	51233550	0.0000	Identified	19873	0.0	b2b4b5b6b8y1y3y5y6y7y8	196733	685	939478145556335	147895629111267	0.3851	Green	4819	7424221	7424239	206402	40343	40343.00	1.21	1
1369	NCDO2118_RS07220	UTP--glucose-1-phosphate uridylyltransferase 1507001:1507942 forward MW:34834	Regular	147758800	0	348340308	97	12	23	47.92	275349	217012	111217	1	1	Pass1	PepFrag1	None	33447260	YLLTPEIFDVLETQVPGAGNEIQLTDAIER	YLLTPEIFDVLETQVPGAGNEIQLTDAIER	218	30	3.43	313	34	34	27	9	1039573000	91864	Identified	57587	11.3	b2b3b4b4b7b8b9b10b11b12b13b13b14b14b15b15b30y1y2y3y4y5y6y7y8y9y10y11y11y12y15y15*y16y16y17y18y19y20y23y26y27y30y30*	468489	3133	258860963975681	132573975983787	0.4374	Green	50700	33447346	33447210	456255	120451	120451.00	3.03	3
1369	NCDO2118_RS07220	UTP--glucose-1-phosphate uridylyltransferase 1507001:1507942 forward MW:34834	Regular	147758800	0	348340308	97	12	23	47.92	275349	217012	111217	0	2	Pass1	PepFrag1	None	23132774	EMLPIVDKPTIQFIVEEALK	EMLPIVDKPTIQFIVEEALK	36	20	4.16	312	13	13	5	2	100789800	81730	Identified	28114	7.5	b2b4b8b9b20y4y5y6y7y7y8y16y17y17y18y20	433518	2231	206423599951444	976157333009627	0.2158	Green	48637	23132713	23132711	435377	59409	59409.00	2.91	3
1369	NCDO2118_RS07220	UTP--glucose-1-phosphate uridylyltransferase 1507001:1507942 forward MW:34834	Regular	147758800	0	348340308	97	12	23	47.92	275349	217012	111217	0	3	Pass1	PepFrag1	None	24292711	LGFVETTIEYGLEHPQIGANLK	LGFVETTIEYGLEHPQIGANLK	270	22	4.53	317	9	9	2	0	27340280	76064	Missing	9636	6.6	b15b22y2y6y9*y12y15y18y18y19y21y22	367866	2278	20931263614031	995417574268731	0.1349	Green	37873	24292708	24292694	360208	37152	37152.00	3.00	3
1369	NCDO2118_RS07220	UTP--glucose-1-phosphate uridylyltransferase 1507001:1507942 forward MW:34834	Regular	147758800	0	348340308	97	12	23	47.92	275349	217012	111217	0	4	Pass1	PepFrag1	None	30224900	AFVGNEPFVVMLGDDLMNITGNETPLTK	AFVGNEPFVVMLGDDLMNITGNETPLTK	126	28	3.59	314	24	24	10	6	413477300	87860	Identified	10660	6.8	b3b4b6b6*b8b10b11b12b13*b15b16b16*b17b19b23b23*b24y1y2y4y5y6y8y8*y9y11y12y13y15y18y28*	459139	2822	241433561256485	120955707504323	0.1161	Green	53083	30224993	30224907	486618	31970	31970.00	3.00	3
1369	NCDO2118_RS07220	UTP--glucose-1-phosphate uridylyltransferase 1507001:1507942 forward MW:34834	Regular	147758800	0	348340308	97	12	23	47.92	275349	217012	111217	0	5	Pass1	PepFrag1	None	10256102	AVIPAAGLGTR	AVIPAAGLGTR	15	11	11.05	316	2	2	0	0	779346	60613	Identified	254	2.6	b3y1	182235	981	119363709156196	198727418312392	0.0215	Green	19158	10256021	10256042	283965	5923	5923.00	1.00	1
1369	NCDO2118_RS07220	UTP--glucose-1-phosphate uridylyltransferase 1507001:1507942 forward MW:34834	Regular	147758800	0	348340308	97	12	23	47.92	275349	217012	111217	0	6	Pass1	PepFrag1	None	40129558	AFVGNEPFVVMLGDDLMNITGNETPLTKDLINDYEK	AFVGNEPFVVMLGDDLMNITGNETPLTKDLINDYEK	126	36	3.63	315	2	2	0	0	20561790	74826	Identified	223	2.7	b8*b17y12*y17	458667	3733	29093655642459	15395770428306	0.0072	Green	54603	40129905	40129639	508795	1983	1983.00	3.40	3
1369	NCDO2118_RS07220	UTP--glucose-1-phosphate uridylyltransferase 1507001:1507942 forward MW:34834	Regular	147758800	0	348340308	97	12	23	47.92	275349	217012	111217	0	7	Pass1	PepFrag1	None	20700866	FVEKPNVDEAPSDLAIIGR	FVEKPNVDEAPSDLAIIGR	199	19	4.06	311	2	2	0	0	5652355	69218	Identified	376	1.8	b8*b10y8	291752	1931	187476922890483	849846152603218	0.0042	Green	12245	20700816	20700834	257112	1159	1159.00	3.00	3
1369	NCDO2118_RS07220	UTP--glucose-1-phosphate uridylyltransferase 1507001:1507942 forward MW:34834	Regular	147758800	0	348340308	97	12	23	47.92	275349	217012	111217	0	8	Pass2	PepFrag2	None	12447096	SGIEDILIVTGK	SGIEDILIVTGK	56	12	4.07	322	0	0	0	0	873572	61109		99	1.7	b9	319187	1198	136373769893458	963737698934584	0.0059	Green	37697	12447279	12447306	359510	1614	1614.00	2.00	2
1369	NCDO2118_RS07220	UTP--glucose-1-phosphate uridylyltransferase 1507001:1507942 forward MW:34834	Regular	147758800	0	348340308	97	12	23	47.92	275349	217012	111217	0	9	Pass2	VarMod	Phosphoryl STY(1);Phosphoryl STY(25)	35046586	YLLTPEIFDVLETQVPGAGNEIQLTDAIER	YLLTPEIFDVLETQVPGAGNEIQLTDAIER	218	30	3.43	319	4	4	0	0	8458923	70969	Identified	653	4.1	b5b11b16*y10-H3PO4y15y15y27	468489	3133	258860963975681	132573975983787	0.0271	Green	48341	35046919	35046755	432554	7452	7452.00	3.15	3
1369	NCDO2118_RS07220	UTP--glucose-1-phosphate uridylyltransferase 1507001:1507942 forward MW:34834	Regular	147758800	0	348340308	97	12	23	47.92	275349	217012	111217	0	10	Pass2	VarMod	Oxidation M(2)	23292723	EMLPIVDKPTIQFIVEEALK	EMLPIVDKPTIQFIVEEALK	36	20	4.16	318	4	4	0	0	2157285	65035	Identified	1991	3.1	b4b9b11b13*y8y10y12*	433518	2231	206423599951444	976157333009627	0.0182	Green	46502	23292749	23292745	415340	5019	5019.00	2.82	3
1369	NCDO2118_RS07220	UTP--glucose-1-phosphate uridylyltransferase 1507001:1507942 forward MW:34834	Regular	147758800	0	348340308	97	12	23	47.92	275349	217012	111217	0	11	Pass2	VarMod	Phosphoryl STY(1);Phosphoryl STY(13)	35046586	YLLTPEIFDVLETQVPGAGNEIQLTDAIER	YLLTPEIFDVLETQVPGAGNEIQLTDAIER	218	30	3.43	320	0	0	0	0	2532623	65731	Identified	138	2.7	b6b10y15*	468489	3133	258860963975681	132573975983787	0.0084	Green	48708	35046983	35046819	436219	2324	2324.00	3.00	3
1369	NCDO2118_RS07220	UTP--glucose-1-phosphate uridylyltransferase 1507001:1507942 forward MW:34834	Regular	147758800	0	348340308	97	12	23	47.92	275349	217012	111217	0	12	Pass2	VarMod	Phosphoryl STY(*)	25092374	LGFVETTIEYGLEHPQIGANLK	LGFVETTIEYGLEHPQIGANLK	270	22	4.53	321	3	3	0	0	1947424	64590	Missing	1486	1.7	b3b18*y1y5*y11y18y19*	367866	2278	20931263614031	995417574268731	0.0032	Green	34304	25092397	25092376	344296	893	893.00	3.00	3
1369	NCDO2118_RS07220	UTP--glucose-1-phosphate uridylyltransferase 1507001:1507942 forward MW:34834	Regular	5560022	0	348340308	15	5	23	18.21	13876	7725	4244	1	1	Pass1	PepFrag1	None	10256102	AVIPAAGLGTR	AVIPAAGLGTR	15	11	11.05	859	3	3	2	0	39506370	63417	Identified	1583	2.4	y4y6y7y8	207444	981	119363709156196	793637091561962	0.3494	Yellow	6533	10256067	10256086	210742	4848	4848.00	2.00	2
1369	NCDO2118_RS07220	UTP--glucose-1-phosphate uridylyltransferase 1507001:1507942 forward MW:34834	Regular	5560022	0	348340308	15	5	23	18.21	13876	7725	4244	0	2	Pass1	PepFrag1	None	33447260	YLLTPEIFDVLETQVPGAGNEIQLTDAIER	YLLTPEIFDVLETQVPGAGNEIQLTDAIER	218	30	3.43	861	2	2	0	1	36387320	63060	Identified	595	2.4	b15y15	439454	3133	258860963975681	132573975983787	0.1190	Yellow	11280	33447513	33447353	460412	1651	1651.00	3.00	3
1369	NCDO2118_RS07220	UTP--glucose-1-phosphate uridylyltransferase 1507001:1507942 forward MW:34834	Regular	5560022	0	348340308	15	5	23	18.21	13876	7725	4244	0	3	Pass1	PepFrag1	None	10094837	DLINDYEK	DLINDYEK	154	8	3.70	858	4	4	2	0	17951810	59992		460	1.3	b6b8y4y5y6	172002	911	113615753267925	736157532679247	0.0884	Yellow	6036	10094779	10094797	196645	1226	1226.00	2.00	2
1369	NCDO2118_RS07220	UTP--glucose-1-phosphate uridylyltransferase 1507001:1507942 forward MW:34834	Regular	5560022	0	348340308	15	5	23	18.21	13876	7725	4244	0	4	Pass1	PepFrag1	None	9244421	VPHDDVDK	VPHDDVDK	172	8	4.16	860	1	1	0	0	7644852	56284	Identified	33	1.1	y7	86306	826	10643382394892	664338239489203	0.0615	Red	940	9244407	9244427	102736	853	853.00	2.00	2
1369	NCDO2118_RS07220	UTP--glucose-1-phosphate uridylyltransferase 1507001:1507942 forward MW:34834	Regular	5560022	0	348340308	15	5	23	18.21	13876	7725	4244	0	5	Pass2	PepFrag2	None	12776372	YGVIDPNGEVSK	YGVIDPNGEVSK	180	12	4.07	862	1	1	0	0	776999	46355	Missing	120	2.0	b10y6*y8	183491	1165	13385776963791	938577696379104	0.1781	Red	2814	12775950	12775964	140581	2472	2472.00	2.00	2
1369	NCDO2118_RS07220	UTP--glucose-1-phosphate uridylyltransferase 1507001:1507942 forward MW:34834	Regular	5560022	0	348340308	15	5	23	18.21	13876	7725	4244	0	6	Pass2	InSource	None	7424206	PAAGLGTR	AVIPAAGLGTR	18	8	11.05	859	4	4	2	0	7074818	0.0000	Identified	1453	0.0	b8y6y6y7y8	207444	685	939478145556335	147895629111267	0.2037	Yellow	6534	7424216	7424233	210750	2826	2826.00	1.30	1
1369	NCDO2118_RS07220	UTP--glucose-1-phosphate uridylyltransferase 1507001:1507942 forward MW:34834	Regular	6077833	0	348340308	34	6	23	8.31	133270	69446	49185	1	1	Pass1	PepFrag1	None	8504417	GLYNVER	GLYNVER	192	7	7.00	1386	9	9	5	3	223029200	71321		22999	4.4	b2b3b4b5y1y2y3y4y5y5*y7	154620	771	101655111151538	163310222303075	0.2992	Green	3086	8504425	8504441	158467	39879	39879.00	1.27	1
1369	NCDO2118_RS07220	UTP--glucose-1-phosphate uridylyltransferase 1507001:1507942 forward MW:34834	Regular	6077833	0	348340308	34	6	23	8.31	133270	69446	49185	0	2	Pass1	PepFrag1	None	6033712	TELLK	TELLK	92	5	7.00	1387	5	5	2	1	34963200	63274		1786	2.0	b4b5y1y4y5	147332	585	845662121375672	129132424275134	0.1669	Green	2374	6033707	6033727	149938	22248	22248.00	1.00	1
1369	NCDO2118_RS07220	UTP--glucose-1-phosphate uridylyltransferase 1507001:1507942 forward MW:34834	Regular	6077833	0	348340308	34	6	23	8.31	133270	69446	49185	0	3	Pass1	PepFrag1	None	7794298	NYIIEK	NYIIEK	292	6	6.89	1390	3	3	0	0	22891040	61434		1262	2.3	y1y3y3y6	154703	729	97929	155858	0.0549	Green	3369	7794323	7794340	161669	7319	7319.00	1.25	1
1369	NCDO2118_RS07220	UTP--glucose-1-phosphate uridylyltransferase 1507001:1507942 forward MW:34834	Regular	6077833	0	348340308	34	6	23	8.31	133270	69446	49185	0	4	Pass2	PepFrag2	None	10094837	DLINDYEK	DLINDYEK	154	8	3.70	1388	1	1	0	0	2307788	51469		109	2.8	y5	182004	911	113615753267925	736157532679247	0.0711	Yellow	7266	10094923	10094950	199714	9478	9478.00	2.00	2
1369	NCDO2118_RS07220	UTP--glucose-1-phosphate uridylyltransferase 1507001:1507942 forward MW:34834	Regular	6077833	0	348340308	34	6	23	8.31	133270	69446	49185	0	5	Pass2	PepFrag2	None	10355258	VFAHEFTGK	VFAHEFTGK	254	9	7.82	1389	0	0	0	0	1170305	48520		50	1.8	y8	160501	945	116425337760286	764253377602863	0.0208	Red	7472	10355149	10355177	201557	2766	2766.00	2.00	2
1369	NCDO2118_RS07220	UTP--glucose-1-phosphate uridylyltransferase 1507001:1507942 forward MW:34834	Regular	6077833	0	348340308	34	6	23	8.31	133270	69446	49185	0	6	Pass2	VarMod	Phosphoryl STY(8)	11135373	MKQSTIPTK	MKQSTIPTK	0	9	10.60	1391	4	4	0	0	1262395	48849	Missing	650	1.3	b5b5*b9y7y9	68766	981	119363709156196	793637091561962	0.0078	Red	11226	11135328	11135355	243753	1045	1045.00	2.00	2
1369	NCDO2118_RS07220	UTP--glucose-1-phosphate uridylyltransferase 1507001:1507942 forward MW:34834	Regular	6077833	0	348340308	34	6	23	8.31	133270	69446	49185	0	7	Pass2	InSource	None	6803362	YNVER	GLYNVER	194	5	7.00	1386	7	7	5	2	305600400	0.0000		18147	0.0	b2b3b3*b4y2y3y4y4*y5y5*	154620	599	85910091671144	131820183342288	0.2872	Green	3105	6803342	6803362	158665	38274	38274.00	1.07	1
1369	NCDO2118_RS07220	UTP--glucose-1-phosphate uridylyltransferase 1507001:1507942 forward MW:34834	Regular	6077833	0	348340308	34	6	23	8.31	133270	69446	49185	0	8	Pass2	InSource	None	5172729	NVER	GLYNVER	195	4	7.00	1386	5	5	2	1	114354200	0.0000		4182	0.0	b2b4y2y3y4y4*	154620	458	718350865789055	103670173157811	0.0920	Green	3095	5172737	5172756	158534	12261	12261.00	1.00	1
1369	NCDO2118_RS07220	UTP--glucose-1-phosphate uridylyltransferase 1507001:1507942 forward MW:34834	Regular	11096360	0	348340308	26	6	23	22.04	77883	58556	29700	1	1	Pass1	PepFrag1	None	10256102	AVIPAAGLGTR	AVIPAAGLGTR	15	11	11.05	1288	11	11	8	3	284183500	74988	Identified	24309	5.4	b2b3b4y3y4y5y6y7y8y9y11	191944	981	119363709156196	793637091561962	0.5614	Green	4215	10256019	10256047	206150	43726	43726.00	1.94	2
1369	NCDO2118_RS07220	UTP--glucose-1-phosphate uridylyltransferase 1507001:1507942 forward MW:34834	Regular	11096360	0	348340308	26	6	23	22.04	77883	58556	29700	0	2	Pass1	PepFrag1	None	12776372	YGVIDPNGEVSK	YGVIDPNGEVSK	180	12	4.07	1290	0	0	0	0	2145893	53768	Missing	31	3.0	y9*	198265	1165	13385776963791	938577696379104	0.1014	Yellow	5971	12776439	12776462	226549	7900	7900.00	2.00	2
1369	NCDO2118_RS07220	UTP--glucose-1-phosphate uridylyltransferase 1507001:1507942 forward MW:34834	Regular	11096360	0	348340308	26	6	23	22.04	77883	58556	29700	0	3	Pass1	PepFrag1	None	20700866	FVEKPNVDEAPSDLAIIGR	FVEKPNVDEAPSDLAIIGR	199	19	4.06	1291	2	2	0	0	3001131	55225	Identified	1360	3.4	b6b9b10b12y19	285099	1931	187476922890483	849846152603218	0.0890	Yellow	16003	20700835	20700853	365428	6930	6930.00	2.82	3
1369	NCDO2118_RS07220	UTP--glucose-1-phosphate uridylyltransferase 1507001:1507942 forward MW:34834	Regular	11096360	0	348340308	26	6	23	22.04	77883	58556	29700	0	4	Pass1	PepFrag1	None	10355258	VFAHEFTGK	VFAHEFTGK	254	9	7.82	1287	4	4	1	0	24455000	64335		950	2.2	y1y6y8y9	168431	945	116425337760286	764253377602863	0.0603	Green	1795	10355195	10355224	168055	4695	4695.00	2.00	2
1369	NCDO2118_RS07220	UTP--glucose-1-phosphate uridylyltransferase 1507001:1507942 forward MW:34834	Regular	11096360	0	348340308	26	6	23	22.04	77883	58556	29700	0	5	Pass1	PepFrag1	None	10585663	THASTIAVMK	THASTIAVMK	162	10	10.10	1289	2	2	0	0	2886466	55055		107	2.3	b8y1	162137	999	120819386560693	808193865606928	0.0566	Yellow	1307	10585600	10585628	154779	4412	4412.00	2.00	2
1369	NCDO2118_RS07220	UTP--glucose-1-phosphate uridylyltransferase 1507001:1507942 forward MW:34834	Regular	11096360	0	348340308	26	6	23	22.04	77883	58556	29700	0	6	Pass2	PepFrag2	None	10094837	DLINDYEK	DLINDYEK	154	8	3.70	1292	1	1	0	0	1926313	53299		38	1.2	y5	188411	911	113615753267925	736157532679247	0.0125	Yellow	10511	10094640	10094669	276057	972	972.00	2.00	2
1369	NCDO2118_RS07220	UTP--glucose-1-phosphate uridylyltransferase 1507001:1507942 forward MW:34834	Regular	11096360	0	348340308	26	6	23	22.04	77883	58556	29700	0	7	Pass2	InSource	None	8555047	IPAAGLGTR	AVIPAAGLGTR	17	9	11.05	1288	4	4	2	0	5378415	0.0000	Missing	2385	0.0	y5y6y7y9	191944	809	104968417199809	649684171998087	0.1010	Green	4214	8554971	8555001	206148	7870	7870.00	1.72	2
1369	NCDO2118_RS07220	UTP--glucose-1-phosphate uridylyltransferase 1507001:1507942 forward MW:34834	Regular	11096360	0	348340308	26	6	23	22.04	77883	58556	29700	0	8	Pass2	InSource	None	5743307	AGLGTR	AVIPAAGLGTR	20	6	11.05	1288	2	2	0	0	885154	0.0000		520	0.0	y1y6	191944	528	789797186930905	117959437386181	0.0177	Green	4227	5743302	5743321	206280	1378	1378.00	1.00	1
1369	NCDO2118_RS07220	UTP--glucose-1-phosphate uridylyltransferase 1507001:1507942 forward MW:34834	Regular	112821200	0	348340308	92	11	23	53.99	279843	232793	108422	1	1	Pass1	PepFrag1	None	33447260	YLLTPEIFDVLETQVPGAGNEIQLTDAIER	YLLTPEIFDVLETQVPGAGNEIQLTDAIER	218	30	3.43	391	31	31	20	5	787233000	89485	Identified	58249	11.5	b2b3b4b4b6b7b9b10b11b12b13b13b14b14b15b15b16b17b18b18*b21b21b30y1y2y3y4y5y7y8*y9y10y11y11y12y13y14*y15y15*y15y16y16y18y26y28*y30	480709	3133	258860963975681	132573975983787	0.4460	Green	43480	33447379	33447286	456270	124803	124803.00	3.07	3
1369	NCDO2118_RS07220	UTP--glucose-1-phosphate uridylyltransferase 1507001:1507942 forward MW:34834	Regular	112821200	0	348340308	92	11	23	53.99	279843	232793	108422	0	2	Pass1	PepFrag1	None	24292711	LGFVETTIEYGLEHPQIGANLK	LGFVETTIEYGLEHPQIGANLK	270	22	4.53	389	13	13	3	2	29990700	75294	Identified	11805	7.6	b3b4b7b12b13b14b17*b22y1y4y8y11y12y15y19y20y22	368336	2278	20931263614031	995417574268731	0.1942	Green	32811	24292735	24292735	363605	54355	54355.00	3.01	3
1369	NCDO2118_RS07220	UTP--glucose-1-phosphate uridylyltransferase 1507001:1507942 forward MW:34834	Regular	112821200	0	348340308	92	11	23	53.99	279843	232793	108422	0	3	Pass1	PepFrag1	None	23132774	EMLPIVDKPTIQFIVEEALK	EMLPIVDKPTIQFIVEEALK	36	20	4.16	390	13	13	7	4	186834500	83238	Identified	23107	7.3	b2b3b3b4b5b6b12b16*y6y7y8y9y9*y12y12y16y17y17y18	432455	2231	206423599951444	976157333009627	0.1917	Green	41907	23132737	23132746	436270	53635	53635.00	3.00	3
1369	NCDO2118_RS07220	UTP--glucose-1-phosphate uridylyltransferase 1507001:1507942 forward MW:34834	Regular	112821200	0	348340308	92	11	23	53.99	279843	232793	108422	0	4	Pass1	PepFrag1	None	30224900	AFVGNEPFVVMLGDDLMNITGNETPLTK	AFVGNEPFVVMLGDDLMNITGNETPLTK	126	28	3.59	392	23	23	12	6	248176000	84472	Identified	11447	6.7	b4b6b9*b10b11b12b12b13b14b14*b15b17b21*b24b24y4y5y8y8y9y10y11y12y13y13y15y16y18y22y23y28y28*	462666	2822	241433561256485	120955707504323	0.1091	Green	45231	30224927	30224872	487024	30532	30532.00	2.84	3
1369	NCDO2118_RS07220	UTP--glucose-1-phosphate uridylyltransferase 1507001:1507942 forward MW:34834	Regular	112821200	0	348340308	92	11	23	53.99	279843	232793	108422	0	5	Pass1	PepFrag1	None	12447096	SGIEDILIVTGK	SGIEDILIVTGK	56	12	4.07	388	2	2	0	0	2960449	65237		181	1.4	b6y7y9	326629	1198	136373769893458	963737698934584	0.0038	Green	32421	12447075	12447109	361451	1068	1068.00	2.00	2
1369	NCDO2118_RS07220	UTP--glucose-1-phosphate uridylyltransferase 1507001:1507942 forward MW:34834	Regular	112821200	0	348340308	92	11	23	53.99	279843	232793	108422	0	6	Pass1	PepFrag1	None	20700866	FVEKPNVDEAPSDLAIIGR	FVEKPNVDEAPSDLAIIGR	199	19	4.06	386	2	2	1	0	3871112	66402	Identified	212	1.6	b10b11	290633	1931	187476922890483	849846152603218	0.0033	Green	9999	20700813	20700835	258651	914	914.00	3.00	3
1369	NCDO2118_RS07220	UTP--glucose-1-phosphate uridylyltransferase 1507001:1507942 forward MW:34834	Regular	112821200	0	348340308	92	11	23	53.99	279843	232793	108422	0	7	Pass1	PepFrag1	None	24392150	RPIEDHFDSNIELEQNLLEK	RPIEDHFDSNIELEQNLLEK	70	20	4.12	387	0	0	0	0	3560175	66039	Missing	601	1.6	b10*b11b18b20y10y11	330084	2243	207163139137999	167163139137999	0.0032	Green	24570	24392364	24392327	323633	897	897.00	2.00	2
1369	NCDO2118_RS07220	UTP--glucose-1-phosphate uridylyltransferase 1507001:1507942 forward MW:34834	Regular	112821200	0	348340308	92	11	23	53.99	279843	232793	108422	0	8	Pass2	PepFrag2	None	10256102	AVIPAAGLGTR	AVIPAAGLGTR	15	11	11.05	393	2	2	0	0	15485690	72423	Identified	352	1.4	y6y8	184463	981	119363709156196	793637091561962	0.0040	Green	1876	10255963	10255999	190252	1106	1106.00	2.00	2
1369	NCDO2118_RS07220	UTP--glucose-1-phosphate uridylyltransferase 1507001:1507942 forward MW:34834	Regular	112821200	0	348340308	92	11	23	53.99	279843	232793	108422	0	9	Pass2	MissedCleavage	None	11537052	KAVIPAAGLGTR	KAVIPAAGLGTR	14	12	11.49	394	2	2	0	0	2318209	64175	Identified	118	3.0	y4y8	314533	1116	130077574610854	90077574610854	0.0279	Green	18621	11536965	11536999	299215	7805	7805.00	2.00	2
1369	NCDO2118_RS07220	UTP--glucose-1-phosphate uridylyltransferase 1507001:1507942 forward MW:34834	Regular	112821200	0	348340308	92	11	23	53.99	279843	232793	108422	0	10	Pass2	VarMod	Oxidation M(2)	23292723	EMLPIVDKPTIQFIVEEALK	EMLPIVDKPTIQFIVEEALK	36	20	4.16	395	2	2	0	0	2610199	64691	Missing	1402	2.7	b4y8	432455	2231	206423599951444	976157333009627	0.0125	Green	40101	23292732	23292739	415482	3507	3507.00	2.78	3
1369	NCDO2118_RS07220	UTP--glucose-1-phosphate uridylyltransferase 1507001:1507942 forward MW:34834	Regular	112821200	0	348340308	92	11	23	53.99	279843	232793	108422	0	11	Pass2	VarMod	Phosphoryl STY(*);Phosphoryl STY(*)	33496156	LGFVETTIEYGLEHPQIGANLKNYIIEK	LGFVETTIEYGLEHPQIGANLKNYIIEK	270	28	4.70	396	2	2	0	0	4253690	66812	Identified	948	2.1	b12b13-H3PO4b14-H3PO4y5y7y8	395683	3007	251873176664347	60749270665739	0.0044	Green	19539	33496134	33496134	303296	1221	1221.00	4.64	5
1369	NCDO2118_RS07220	UTP--glucose-1-phosphate uridylyltransferase 1507001:1507942 forward MW:34834	Regular	4557207	0	348340308	8	2	23	13.10	9858	11730	3827	1	1	Pass1	PepFrag1	None	10256102	AVIPAAGLGTR	AVIPAAGLGTR	15	11	11.05	335	6	6	4	1	100843600	66623	Identified	2050	2.7	b2y4y5y6y7y8y9	200652	981	119363709156196	793637091561962	0.6401	Green	3375	10256070	10256099	207790	6310	6310.00	2.00	2
1369	NCDO2118_RS07220	UTP--glucose-1-phosphate uridylyltransferase 1507001:1507942 forward MW:34834	Regular	4557207	0	348340308	8	2	23	13.10	9858	11730	3827	0	2	Pass1	PepFrag1	None	33447260	YLLTPEIFDVLETQVPGAGNEIQLTDAIER	YLLTPEIFDVLETQVPGAGNEIQLTDAIER	218	30	3.43	336	1	1	0	0	10570870	56828	Identified	458	2.3	y10*y15	448173	3133	258860963975681	132573975983787	0.1532	Yellow	6821	33447536	33447420	459606	1510	1510.00	3.00	3
1369	NCDO2118_RS07220	UTP--glucose-1-phosphate uridylyltransferase 1507001:1507942 forward MW:34834	Regular	4557207	0	348340308	8	2	23	13.10	9858	11730	3827	0	3	Pass2	InSource	None	7424206	PAAGLGTR	AVIPAAGLGTR	18	8	11.05	335	1	1	0	0	2698765	0.0000	Identified	1319	0.0	y8	200652	685	939478145556335	147895629111267	0.2067	Green	3378	7424202	7424223	207849	2038	2038.00	1.00	1
1369	NCDO2118_RS07220	UTP--glucose-1-phosphate uridylyltransferase 1507001:1507942 forward MW:34834	Regular	10341680	0	348340308	35	5	23	19.49	145184	63432	82014	1	1	Pass1	PepFrag1	None	10256102	AVIPAAGLGTR	AVIPAAGLGTR	15	11	11.05	975	11	11	9	2	282072400	74650	Identified	39997	5.9	b2b3y3y4y5y6y7y8y9y10y11	193416	981	119363709156196	793637091561962	0.3776	Green	3523	10256040	10256065	206411	54815	54815.00	1.93	2
1369	NCDO2118_RS07220	UTP--glucose-1-phosphate uridylyltransferase 1507001:1507942 forward MW:34834	Regular	10341680	0	348340308	35	5	23	19.49	145184	63432	82014	0	2	Pass1	PepFrag1	None	10355258	VFAHEFTGK	VFAHEFTGK	254	9	7.82	974	3	3	1	0	6394283	58204		785	2.4	y5y6y9	180000	945	116425337760286	764253377602863	0.0413	Green	1598	10355234	10355260	169231	5996	5996.00	2.00	2
1369	NCDO2118_RS07220	UTP--glucose-1-phosphate uridylyltransferase 1507001:1507942 forward MW:34834	Regular	10341680	0	348340308	35	5	23	19.49	145184	63432	82014	0	3	Pass1	PepFrag1	None	10585663	THASTIAVMK	THASTIAVMK	162	10	10.10	973	3	3	1	1	2531991	54181		261	1.9	b2y8y9	172663	999	120819386560693	808193865606928	0.0181	Yellow	1187	10585684	10585709	155097	2621	2621.00	2.00	2
1369	NCDO2118_RS07220	UTP--glucose-1-phosphate uridylyltransferase 1507001:1507942 forward MW:34834	Regular	10341680	0	348340308	35	5	23	19.49	145184	63432	82014	0	4	Pass2	PepFrag2	None	12776372	YGVIDPNGEVSK	YGVIDPNGEVSK	180	12	4.07	976	3	3	1	0	2103052	53374	Missing	197	2.2	b6y8y9y9*	197772	1165	13385776963791	938577696379104	0.0238	Yellow	5686	12776494	12776513	236724	3459	3459.00	2.00	2
1369	NCDO2118_RS07220	UTP--glucose-1-phosphate uridylyltransferase 1507001:1507942 forward MW:34834	Regular	10341680	0	348340308	35	5	23	19.49	145184	63432	82014	0	5	Pass2	PepFrag2	None	20700866	FVEKPNVDEAPSDLAIIGR	FVEKPNVDEAPSDLAIIGR	199	19	4.06	977	0	0	0	0	1370798	51516	Identified	103	1.7	b4	274732	1931	187476922890483	849846152603218	0.0068	Yellow	8023	20701056	20701083	266332	984	984.00	3.00	3
1369	NCDO2118_RS07220	UTP--glucose-1-phosphate uridylyltransferase 1507001:1507942 forward MW:34834	Regular	10341680	0	348340308	35	5	23	19.49	145184	63432	82014	0	6	Pass2	InSource	None	7424206	PAAGLGTR	AVIPAAGLGTR	18	8	11.05	975	11	11	5	2	84342560	0.0000	Identified	37984	0.0	b2b4b5b6b7b8y1y3y5y6y7y8	193416	685	939478145556335	147895629111267	0.4780	Green	3525	7424203	7424220	206416	69403	69403.00	1.21	1
1369	NCDO2118_RS07220	UTP--glucose-1-phosphate uridylyltransferase 1507001:1507942 forward MW:34834	Regular	10341680	0	348340308	35	5	23	19.49	145184	63432	82014	0	7	Pass2	InSource	None	6453679	AAGLGTR	AVIPAAGLGTR	19	7	11.05	975	1	1	0	0	1328575	0.0000		1626	0.0	y7	193416	595	8552720467471	13105440934942	0.0339	Green	3506	6453637	6453655	206260	4926	4926.00	1.00	1
1369	NCDO2118_RS07220	UTP--glucose-1-phosphate uridylyltransferase 1507001:1507942 forward MW:34834	Regular	10341680	0	348340308	35	5	23	19.49	145184	63432	82014	0	8	Pass2	InSource	None	5743307	AGLGTR	AVIPAAGLGTR	20	6	11.05	975	2	2	0	0	1244401	0.0000		802	0.0	y1y6	193416	528	789797186930905	117959437386181	0.0137	Green	3531	5743289	5743307	206472	1989	1989.00	1.00	1
1369	NCDO2118_RS07220	UTP--glucose-1-phosphate uridylyltransferase 1507001:1507942 forward MW:34834	Regular	10341680	0	348340308	35	5	23	19.49	145184	63432	82014	0	9	Pass2	InSource	None	5032936	GLGTR	AVIPAAGLGTR	21	5	11.05	975	1	1	0	0	1589995	0.0000		259	0.0	y5	193416	461	721484354497842	104296870899568	0.0068	Green	3517	5032900	5032918	206373	991	991.00	1.00	1
1369	NCDO2118_RS07220	UTP--glucose-1-phosphate uridylyltransferase 1507001:1507942 forward MW:34834	Regular	128650300	0	348340308	96	12	23	63.26	255390	180553	78436	1	1	Pass1	PepFrag1	None	33447260	YLLTPEIFDVLETQVPGAGNEIQLTDAIER	YLLTPEIFDVLETQVPGAGNEIQLTDAIER	218	30	3.43	268	32	32	21	6	1084843000	91448	Identified	52454	11.2	b2b3b4b4b5b7b8b9b10b11b12b13b13b14b15b15b18b21b30y1y2y3y4y5y6y7y8y9y10*y11y11*y12y12*y15y15*y15y16y16*y16y17y18y26y26*y29*y29y30	468509	3133	258860963975681	132573975983787	0.4625	Green	37184	33447379	33447265	457108	118126	118126.00	3.06	3
1369	NCDO2118_RS07220	UTP--glucose-1-phosphate uridylyltransferase 1507001:1507942 forward MW:34834	Regular	128650300	0	348340308	96	12	23	63.26	255390	180553	78436	0	2	Pass1	PepFrag1	None	23132774	EMLPIVDKPTIQFIVEEALK	EMLPIVDKPTIQFIVEEALK	36	20	4.16	267	12	12	4	2	25521150	75163	Identified	6008	6.7	b2b2b3b3b5b6b10b13y5y6y8y13y17y18y20	436695	2231	206423599951444	976157333009627	0.1715	Green	35705	23132685	23132688	437944	43811	43811.00	2.93	3
1369	NCDO2118_RS07220	UTP--glucose-1-phosphate uridylyltransferase 1507001:1507942 forward MW:34834	Regular	128650300	0	348340308	96	12	23	63.26	255390	180553	78436	0	3	Pass1	PepFrag1	None	24292711	LGFVETTIEYGLEHPQIGANLK	LGFVETTIEYGLEHPQIGANLK	270	22	4.53	273	9	9	2	1	18358280	73732	Identified	7904	5.1	b4b10b11b12b22y1y4*y8y12y14*y17y18y22	373833	2278	20931263614031	995417574268731	0.0729	Green	28277	24292720	24292714	369962	18616	18616.00	3.00	3
1369	NCDO2118_RS07220	UTP--glucose-1-phosphate uridylyltransferase 1507001:1507942 forward MW:34834	Regular	128650300	0	348340308	96	12	23	63.26	255390	180553	78436	0	4	Pass1	PepFrag1	None	30224900	AFVGNEPFVVMLGDDLMNITGNETPLTK	AFVGNEPFVVMLGDDLMNITGNETPLTK	126	28	3.59	269	22	22	12	7	236099400	84825	Identified	9551	5.5	b6b6b9*b10b10*b11b12b13*b14*b15b16b17b18b18*b19b24*b28y4y5y8y8*y9y10y11y12y14y17y18y18*y22y22*y28	458098	2822	241433561256485	120955707504323	0.0691	Green	38731	30224975	30224906	487400	17650	17650.00	2.82	3
1369	NCDO2118_RS07220	UTP--glucose-1-phosphate uridylyltransferase 1507001:1507942 forward MW:34834	Regular	128650300	0	348340308	96	12	23	63.26	255390	180553	78436	0	5	Pass1	PepFrag1	None	10355258	VFAHEFTGK	VFAHEFTGK	254	9	7.82	272	4	4	1	0	2574858	65202		377	1.7	b5y6y7y9	155452	945	116425337760286	764253377602863	0.0084	Green	249	10355223	10355251	44715	2147	2147.00	2.00	2
1369	NCDO2118_RS07220	UTP--glucose-1-phosphate uridylyltransferase 1507001:1507942 forward MW:34834	Regular	128650300	0	348340308	96	12	23	63.26	255390	180553	78436	0	6	Pass1	PepFrag1	None	26383471	AKRPIEDHFDSNIELEQNLLEK	AKRPIEDHFDSNIELEQNLLEK	68	22	4.43	270	1	1	0	0	5316011	68350	Missing	103	1.9	b10b15*y7*	375428	2445	219421346844165	179421346844165	0.0051	Green	28501	26383554	26383482	371555	1313	1313.00	2.00	2
1369	NCDO2118_RS07220	UTP--glucose-1-phosphate uridylyltransferase 1507001:1507942 forward MW:34834	Regular	128650300	0	348340308	96	12	23	63.26	255390	180553	78436	0	7	Pass2	PepFrag2	None	12447096	SGIEDILIVTGK	SGIEDILIVTGK	56	12	4.07	277	3	3	0	0	1956249	64008		319	2.1	b5b9y12	313062	1198	136373769893458	963737698934584	0.0120	Green	27095	12447346	12447371	363112	3060	3060.00	2.00	2
1369	NCDO2118_RS07220	UTP--glucose-1-phosphate uridylyltransferase 1507001:1507942 forward MW:34834	Regular	128650300	0	348340308	96	12	23	63.26	255390	180553	78436	0	8	Pass2	PepFrag2	None	10256102	AVIPAAGLGTR	AVIPAAGLGTR	15	11	11.05	278	1	1	0	0	721254	59675	Missing	91	1.4	y6	189222	981	119363709156196	793637091561962	0.0041	Green	9137	10255700	10255728	271086	1041	1041.00	2.00	2
1369	NCDO2118_RS07220	UTP--glucose-1-phosphate uridylyltransferase 1507001:1507942 forward MW:34834	Regular	128650300	0	348340308	96	12	23	63.26	255390	180553	78436	0	9	Pass2	PepFrag2	None	20700866	FVEKPNVDEAPSDLAIIGR	FVEKPNVDEAPSDLAIIGR	199	19	4.06	271	3	3	0	1	1154276	61717	Missing	512	1.6	b12y5y7y8	287378	1931	187476922890483	849846152603218	0.0037	Green	30492	20701020	20701041	382908	945	945.00	3.00	3
1369	NCDO2118_RS07220	UTP--glucose-1-phosphate uridylyltransferase 1507001:1507942 forward MW:34834	Regular	128650300	0	348340308	96	12	23	63.26	255390	180553	78436	0	10	Pass2	PepFrag2	None	7794298	NYIIEK	NYIIEK	292	6	6.89	274	1	1	0	0	613903	58975		33	1.0	b3	160433	729	97929	155858	0.0031	Green	3440	7794197	7794217	222566	797	797.00	1.00	1
1369	NCDO2118_RS07220	UTP--glucose-1-phosphate uridylyltransferase 1507001:1507942 forward MW:34834	Regular	128650300	0	348340308	96	12	23	63.26	255390	180553	78436	0	11	Pass2	VarMod	Phosphoryl STY(*)	23571649	LVEETTDINLHFIRQSHPK	LVEETTDINLHFIRQSHPK	97	19	6.03	276	5	5	0	0	3413079	66426	Identified	598	6.6	b7-H3PO4b11b14b17y5y6*y9y9y17	242943	2123	199706850961754	159706850961754	0.1679	Green	36212	23571782	23571740	444537	42875	42875.00	2.03	2
1369	NCDO2118_RS07220	UTP--glucose-1-phosphate uridylyltransferase 1507001:1507942 forward MW:34834	Regular	128650300	0	348340308	96	12	23	63.26	255390	180553	78436	0	12	Pass2	VarMod	Oxidation M(2)	23292723	EMLPIVDKPTIQFIVEEALK	EMLPIVDKPTIQFIVEEALK	36	20	4.16	275	3	3	0	1	4039912	67158	Missing	486	3.1	b10b12y6y8y15*	436695	2231	206423599951444	63211799975722	0.0196	Green	30395	23292664	23292686	382457	5009	5009.00	3.68	4
1369	NCDO2118_RS07220	UTP--glucose-1-phosphate uridylyltransferase 1507001:1507942 forward MW:34834	Regular	5151618	0.58	348340308	12	5	23	23.00	49393	9105	6739	1	1	Pass1	PepFrag1	None	33447260	YLLTPEIFDVLETQVPGAGNEIQLTDAIER	YLLTPEIFDVLETQVPGAGNEIQLTDAIER	218	30	3.43	923	4	4	0	1	43035550	63458	Identified	1432	3.4	b7b8b10b15y11y12y12*y15y22*	468843	3133	258860963975681	132573975983787	0.0930	Green	19401	33447179	33447050	457921	4593	4593.00	3.00	3
1369	NCDO2118_RS07220	UTP--glucose-1-phosphate uridylyltransferase 1507001:1507942 forward MW:34834	Regular	5151618	0.58	348340308	12	5	23	23.00	49393	9105	6739	0	2	Pass1	PepFrag1	None	23132774	EMLPIVDKPTIQFIVEEALK	EMLPIVDKPTIQFIVEEALK	36	20	4.16	922	1	1	0	0	8220148	56268	Identified	492	2.0	y17	440515	2231	206423599951444	976157333009627	0.0299	Yellow	18650	23132644	23132646	438757	1477	1477.00	3.00	3
1369	NCDO2118_RS07220	UTP--glucose-1-phosphate uridylyltransferase 1507001:1507942 forward MW:34834	Regular	5151618	0.58	348340308	12	5	23	23.00	49393	9105	6739	0	3	Pass2	PepFrag2	None	26965307	AIAKEMLPIVDKPTIQFIVEEALK	AIAKEMLPIVDKPTIQFIVEEALK	32	24	4.65	925	4	4	0	0	1679822	49372	Identified	4537	7.0	b11b16b24*y12y12*y24y24*	427482	2624	230004070135665	11333604675711	0.8248	Red	20641	26964674	26964637	506500	40738	40738.00	2.63	3
1369	NCDO2118_RS07220	UTP--glucose-1-phosphate uridylyltransferase 1507001:1507942 forward MW:34834	Regular	5151618	0.58	348340308	12	5	23	23.00	49393	9105	6739	0	4	Pass2	PepFrag2	None	20700866	FVEKPNVDEAPSDLAIIGR	FVEKPNVDEAPSDLAIIGR	199	19	4.06	926	1	1	0	0	758491	45919	Missing	88	1.8	y10	298879	1931	187476922890483	147476922890483	0.0269	Red	14794	20700653	20700636	377725	1329	1329.00	2.00	2
1369	NCDO2118_RS07220	UTP--glucose-1-phosphate uridylyltransferase 1507001:1507942 forward MW:34834	Regular	5151618	0.58	348340308	12	5	23	23.00	49393	9105	6739	0	5	Pass2	PepFrag2	None	26383471	AKRPIEDHFDSNIELEQNLLEK	AKRPIEDHFDSNIELEQNLLEK	68	22	4.43	924	2	2	0	0	4648176	53792	Missing	190	1.9	b7b9y5	308892	2445	219421346844165	179421346844165	0.0254	Yellow	14459	26383514	26383433	373869	1256	1256.00	2.00	2
1369	NCDO2118_RS07220	UTP--glucose-1-phosphate uridylyltransferase 1507001:1507942 forward MW:34834	Regular	4303098	0.74	348340308	30	4	23	11.18	195622	139587	63280	1	1	Pass1	PepFrag1	None	12776372	YGVIDPNGEVSK	YGVIDPNGEVSK	180	12	4.07	1899	5	5	1	0	12047850	57147	Identified	16113	7.2	b3b10*b11b12y7y10y11y11y12	179734	1165	13385776963791	938577696379104	0.4426	Green	6636	12776338	12776369	184959	86588	86588.00	1.96	2
1369	NCDO2118_RS07220	UTP--glucose-1-phosphate uridylyltransferase 1507001:1507942 forward MW:34834	Regular	4303098	0.74	348340308	30	4	23	11.18	195622	139587	63280	0	2	Pass1	PepFrag1	None	8504417	GLYNVER	GLYNVER	192	7	7.00	1898	8	8	4	1	152621200	68174		23240	4.3	b5b7y1y2y3y3y4y4*y5y7y7*	152098	771	101655111151538	163310222303075	0.1910	Green	3448	8504408	8504432	156879	37360	37360.00	1.27	1
1369	NCDO2118_RS07220	UTP--glucose-1-phosphate uridylyltransferase 1507001:1507942 forward MW:34834	Regular	4303098	0.74	348340308	30	4	23	11.18	195622	139587	63280	0	3	Pass1	PepFrag1	None	11916269	VFAHEFTGKR	VFAHEFTGKR	254	10	10.12	1900	2	2	1	0	882016	45793		637	3.6	b9b10	132190	1093	128284172023191	882841720231909	0.0799	Red	4892	11916199	11916230	169920	15639	15639.00	2.00	2
1369	NCDO2118_RS07220	UTP--glucose-1-phosphate uridylyltransferase 1507001:1507942 forward MW:34834	Regular	4303098	0.74	348340308	30	4	23	11.18	195622	139587	63280	0	4	Pass1	PepFrag1	None	7794298	NYIIEK	NYIIEK	292	6	6.89	1901	4	4	0	1	20854480	59530		1509	2.4	b3y1y3y3y6	157733	729	97929	155858	0.0441	Green	3749	7794299	7794325	160550	8621	8621.00	1.22	1
1369	NCDO2118_RS07220	UTP--glucose-1-phosphate uridylyltransferase 1507001:1507942 forward MW:34834	Regular	4303098	0.74	348340308	30	4	23	11.18	195622	139587	63280	0	5	Pass2	InSource	None	6803362	YNVER	GLYNVER	194	5	7.00	1898	8	8	5	2	259695800	0.0000		17625	0.0	b2b3b5y1y2y3y4y4*y5y5*	152098	599	85910091671144	131820183342288	0.1847	Green	3467	6803339	6803364	157102	36139	36139.00	1.08	1
1369	NCDO2118_RS07220	UTP--glucose-1-phosphate uridylyltransferase 1507001:1507942 forward MW:34834	Regular	4303098	0.74	348340308	30	4	23	11.18	195622	139587	63280	0	6	Pass2	InSource	None	5172729	NVER	GLYNVER	195	4	7.00	1898	3	3	0	0	2928507	0.0000		4156	0.0	b2y1y4y4*	152098	458	718350865789055	103670173157811	0.0576	Green	3454	5172696	5172720	156928	11275	11275.00	1.00	1
1369	NCDO2118_RS07220	UTP--glucose-1-phosphate uridylyltransferase 1507001:1507942 forward MW:34834	Regular	4563010	1.26	348340308	21	7	23	12.14	169905	235087.5	46864	1	1	Pass1	PepFrag1	None	12776372	YGVIDPNGEVSK	YGVIDPNGEVSK	180	12	4.07	1685	4	4	2	0	15992930	58632	Missing	15671	7.7	b11b12b12*y11y11y12	179551	1165	13385776963791	938577696379104	0.6213	Green	5496	12776375	12776391	177315	105560	105560.00	1.98	2
1369	NCDO2118_RS07220	UTP--glucose-1-phosphate uridylyltransferase 1507001:1507942 forward MW:34834	Regular	4563010	1.26	348340308	21	7	23	12.14	169905	235087.5	46864	0	2	Pass1	PepFrag1	None	8504417	GLYNVER	GLYNVER	192	7	7.00	1683	7	7	3	1	173032200	68974		29034	4.9	b4b5y1y2y4y4*y5y5*y7	142374	771	101655111151538	163310222303075	0.3011	Green	3526	8504418	8504434	158208	51165	51165.00	1.25	1
1369	NCDO2118_RS07220	UTP--glucose-1-phosphate uridylyltransferase 1507001:1507942 forward MW:34834	Regular	4563010	1.26	348340308	21	7	23	12.14	169905	235087.5	46864	0	3	Pass2	PepFrag2	None	10355258	VFAHEFTGK	VFAHEFTGK	254	9	7.82	1686	2	2	0	0	1120553	47087		254	1.9	b5y7y7	160987	945	116425337760286	764253377602863	0.0178	Red	11764	10355328	10355351	234423	3027	3027.00	2.00	2
1369	NCDO2118_RS07220	UTP--glucose-1-phosphate uridylyltransferase 1507001:1507942 forward MW:34834	Regular	4563010	1.26	348340308	21	7	23	12.14	169905	235087.5	46864	0	4	Pass2	PepFrag2	None	10094837	DLINDYEK	DLINDYEK	154	8	3.70	1684	1	1	0	0	1874515	49321		43	1.1	y6	173237	911	113615753267925	736157532679247	0.0045	Red	11185	10094693	10094717	228116	767	767.00	2.00	2
1369	NCDO2118_RS07220	UTP--glucose-1-phosphate uridylyltransferase 1507001:1507942 forward MW:34834	Regular	4563010	1.26	348340308	21	7	23	12.14	169905	235087.5	46864	0	5	Pass2	VarMod	Phosphoryl STY(10)	11055765	AVIPAAGLGTR	AVIPAAGLGTR	15	11	11.05	1687	0	0	0	0	7686185	55450	Identified	753	2.7	y6y8	208205	981	119363709156196	793637091561962	0.0388	Yellow	5572	11055765	11055787	178150	6592	6592.00	2.00	2
1369	NCDO2118_RS07220	UTP--glucose-1-phosphate uridylyltransferase 1507001:1507942 forward MW:34834	Regular	4563010	1.26	348340308	21	7	23	12.14	169905	235087.5	46864	0	6	Pass2	VarMod	Phosphoryl STY(6)	10815401	QSTIPTKAR	QSTIPTKAR	2	9	11.49	1688	2	2	0	0	617385	44498	Identified	430	1.5	b2*b2b4b7y7	69874	937	11576733294932	757673329493197	0.0090	Red	3471	10815426	10815449	157699	1526	1526.00	2.00	2
1369	NCDO2118_RS07220	UTP--glucose-1-phosphate uridylyltransferase 1507001:1507942 forward MW:34834	Regular	4563010	1.26	348340308	21	7	23	12.14	169905	235087.5	46864	0	7	Pass2	VarMod	Phosphoryl STY(9)	22630278	VPHDDVDKYGVIDPNGEVSK	VPHDDVDKYGVIDPNGEVSK	172	20	4.12	1689	5	5	1	0	5521326	54013	Identified	679	1.9	y1y8y10y10y19y20	205482	1991	191340604142736	875604027618239	0.0075	Yellow	12268	22630481	22630469	240015	1268	1268.00	3.00	3
1372	NCDO2118_RS07235	heptaprenyl diphosphate synthase subunit II 1508938:1509897 forward MW:35699	Regular	6374597	0	356991351	36	12	24	42.63	56697	34736	12129	1	1	Pass1	PepFrag1	None	12406208	SAIFDIFDAGGK	SAIFDIFDAGGK	37	12	3.88	5200	9	9	5	2	104855700	68250		5330	3.9	b3b4y4y6y6y7y8y9y9y10y12	310231	1138	131781508793591	917815087935915	0.2861	Green	32026	12406209	12406237	335737	16220	16220.00	1.92	2
1372	NCDO2118_RS07235	heptaprenyl diphosphate synthase subunit II 1508938:1509897 forward MW:35699	Regular	6374597	0	356991351	36	12	24	42.63	56697	34736	12129	0	2	Pass1	PepFrag1	None	13377311	SYTLSALNLIDK	SYTLSALNLIDK	285	12	6.78	5198	5	5	1	1	51187360	65136		3813	3.9	b2b3b6b9y8y8*y9y10*y10y12	317887	1265	141412125892003	101412125892003	0.2774	Green	25430	13377276	13377301	308611	15726	15726.00	1.90	2
1372	NCDO2118_RS07235	heptaprenyl diphosphate synthase subunit II 1508938:1509897 forward MW:35699	Regular	6374597	0	356991351	36	12	24	42.63	56697	34736	12129	0	3	Pass1	PepFrag1	None	7464407	GVATLSAK	GVATLSAK	98	8	10.10	5201	2	2	0	0	1741174	50453		509	1.8	b5b8y8	126559	712	964005762446893	152801152489379	0.0492	Red	1890	7464409	7464433	184926	2790	2790.00	1.00	1
1372	NCDO2118_RS07235	heptaprenyl diphosphate synthase subunit II 1508938:1509897 forward MW:35699	Regular	6374597	0	356991351	36	12	24	42.63	56697	34736	12129	0	4	Pass1	PepFrag1	None	32666440	LLGGELGQLNHHFNLQQTLDDYIENISGK	LLGGELGQLNHHFNLQQTLDDYIENISGK	146	29	4.52	5199	2	2	0	0	5010084	55043		598	2.2	b27y8*y10*y11y11	359141	3027	252988772679119	864943863395596	0.0262	Yellow	29937	32666502	32666479	327028	1486	1486.00	4.00	4
1372	NCDO2118_RS07235	heptaprenyl diphosphate synthase subunit II 1508938:1509897 forward MW:35699	Regular	6374597	0	356991351	36	12	24	42.63	56697	34736	12129	0	5	Pass2	PepFrag2	None	10726361	ELIAEITRK	ELIAEITRK	304	9	7.11	5202	1	1	0	0	195264	40951		47	2.2	b4	158213	1033	123545381615726	835453816157263	0.0845	Red	18148	10726403	10726433	279801	4792	4792.00	2.00	2
1372	NCDO2118_RS07235	heptaprenyl diphosphate synthase subunit II 1508938:1509897 forward MW:35699	Regular	6374597	0	356991351	36	12	24	42.63	56697	34736	12129	0	6	Pass2	MissedCleavage	None	17838861	NSDVKSAIFDIFDAGGK	NSDVKSAIFDIFDAGGK	32	17	4.17	5203	2	2	0	0	6292422	56033		334	1.7	b5b8*b10b15*y15	310906	1638	167997273130927	127997273130927	0.0225	Yellow	18944	17838867	17838874	283060	1278	1278.00	2.00	2
1372	NCDO2118_RS07235	heptaprenyl diphosphate synthase subunit II 1508938:1509897 forward MW:35699	Regular	6374597	0	356991351	36	12	24	42.63	56697	34736	12129	0	7	Pass2	MissedCleavage	None	23712286	LMSEHSLELSNLTKNIGSIER	LMSEHSLELSNLTKNIGSIER	125	21	5.40	5204	0	0	0	0	2156832	51383		32	1.8	y13	288018	2221	205806303921153	97204202614102	0.0197	Red	18048	23712095	23712087	279599	1115	1115.00	3.00	3
1372	NCDO2118_RS07235	heptaprenyl diphosphate synthase subunit II 1508938:1509897 forward MW:35699	Regular	6374597	0	356991351	36	12	24	42.63	56697	34736	12129	0	8	Pass2	VarMod	Phosphoryl STY(5)	17559292	SYTLSALNLIDKLPK	SYTLSALNLIDKLPK	285	15	9.63	5209	4	4	0	0	2883229	52643	Missing	218	3.0	b4y3y6y8	319467	1614	166352240481448	126352240481448	0.1079	Red	14309	17559356	17559365	265466	6117	6117.00	2.00	2
1372	NCDO2118_RS07235	heptaprenyl diphosphate synthase subunit II 1508938:1509897 forward MW:35699	Regular	6374597	0	356991351	36	12	24	42.63	56697	34736	12129	0	9	Pass2	VarMod	Phosphoryl STY(6);Phosphoryl STY(26)	31043981	LALAASVEMMHIATLVHDDVIDHADTR	LALAASVEMMHIATLVHDDVIDHADTR	70	27	4.51	5207	3	3	0	0	4855795	54907		408	2.7	b6b8b9-H3PO4b13b14-H3PO4y7y11y12-H3PO4	372678	2752	237424347922423	118282898614949	0.0478	Yellow	52550	31044115	31044017	478161	2711	2711.00	2.86	3
1372	NCDO2118_RS07235	heptaprenyl diphosphate synthase subunit II 1508938:1509897 forward MW:35699	Regular	6374597	0	356991351	36	12	24	42.63	56697	34736	12129	0	10	Pass2	VarMod	Phosphoryl STY(6)	25362669	MLRPAYLLLFSGFTVLSENER	MLRPAYLLLFSGFTVLSENER	49	21	7.05	5206	3	3	0	1	7936799	57041	Missing	404	2.4	b9b13b21*y12	429639	2314	211512093559449	171512093559449	0.0414	Yellow	25717	25362619	25362565	309503	2349	2349.00	2.55	2
1372	NCDO2118_RS07235	heptaprenyl diphosphate synthase subunit II 1508938:1509897 forward MW:35699	Regular	6374597	0	356991351	36	12	24	42.63	56697	34736	12129	0	11	Pass2	VarMod	Phosphoryl STY(16)	17839241	TGELFALSASVAPLISK	TGELFALSASVAPLISK	175	17	7.00	5208	3	3	0	0	1781248	50552	Missing	220	1.7	b6b8b14b15	387891	1631	167518306871258	127518306871258	0.0202	Red	10271	17839218	17839225	247704	1144	1144.00	2.00	2
1372	NCDO2118_RS07235	heptaprenyl diphosphate synthase subunit II 1508938:1509897 forward MW:35699	Regular	6374597	0	356991351	36	12	24	42.63	56697	34736	12129	0	12	Pass2	VarMod	Phosphoryl STY(7)	28593787	NNFWKDYPELEKELVQVQQLMK	NNFWKDYPELEKELVQVQQLMK	4	22	4.65	5205	2	2	0	0	6409977	56113	Identified	216	1.7	b10y9y15	398122	2592	228130296883096	112086864588731	0.0171	Yellow	42152	28593838	28593775	381226	969	969.00	3.00	3
1372	NCDO2118_RS07235	heptaprenyl diphosphate synthase subunit II 1508938:1509897 forward MW:35699	Regular	6210584	0.22	356991351	46	10	24	40.44	63596	27432	12544	1	1	Pass1	PepFrag1	None	13377311	SYTLSALNLIDK	SYTLSALNLIDK	285	12	6.78	4511	5	5	2	1	24821980	61880		3542	3.6	b3b3b11*b12y2y8y9y10y10	327391	1265	141412125892003	101412125892003	0.2104	Green	21280	13377229	13377260	310610	13379	13379.00	2.00	2
1372	NCDO2118_RS07235	heptaprenyl diphosphate synthase subunit II 1508938:1509897 forward MW:35699	Regular	6210584	0.22	356991351	46	10	24	40.44	63596	27432	12544	0	2	Pass1	PepFrag1	None	12406208	SAIFDIFDAGGK	SAIFDIFDAGGK	37	12	3.88	4512	10	10	6	2	90039590	67476		3599	3.5	b3b5b5y3y4y5y6y7y8y9y12	316088	1138	131781508793591	917815087935915	0.1884	Green	27506	12406221	12406255	337766	11981	11981.00	1.93	2
1372	NCDO2118_RS07235	heptaprenyl diphosphate synthase subunit II 1508938:1509897 forward MW:35699	Regular	6210584	0.22	356991351	46	10	24	40.44	63596	27432	12544	0	3	Pass1	PepFrag1	None	20900838	DYPELEKELVQVQQLMK	DYPELEKELVQVQQLMK	9	17	4.16	4513	6	6	3	0	15631010	59871	Missing	728	2.1	b10b14b15y5y5*y7y8y9y12*	336002	1967	189799854053258	865332360355051	0.0326	Green	31330	20900816	20900837	356319	2072	2072.00	2.64	3
1372	NCDO2118_RS07235	heptaprenyl diphosphate synthase subunit II 1508938:1509897 forward MW:35699	Regular	6210584	0.22	356991351	46	10	24	40.44	63596	27432	12544	0	4	Pass2	PepFrag2	None	32666440	LLGGELGQLNHHFNLQQTLDDYIENISGK	LLGGELGQLNHHFNLQQTLDDYIENISGK	146	29	4.52	4515	4	4	0	0	6122432	55801		398	3.7	b9y5y7y14*y14y16y17	364646	3027	252988772679119	128659181786079	0.0904	Yellow	35088	32666836	32666753	375028	5749	5749.00	3.00	3
1372	NCDO2118_RS07235	heptaprenyl diphosphate synthase subunit II 1508938:1509897 forward MW:35699	Regular	6210584	0.22	356991351	46	10	24	40.44	63596	27432	12544	0	5	Pass2	PepFrag2	None	17039578	TGELFALSASVAPLISK	TGELFALSASVAPLISK	175	17	7.00	4516	3	3	0	0	5325238	55195	Identified	298	2.4	b3b6b11y5	387935	1631	167518306871258	127518306871258	0.0469	Yellow	34976	17039423	17039441	374582	2983	2983.00	2.00	2
1372	NCDO2118_RS07235	heptaprenyl diphosphate synthase subunit II 1508938:1509897 forward MW:35699	Regular	6210584	0.22	356991351	46	10	24	40.44	63596	27432	12544	0	6	Pass2	PepFrag2	None	16018203	LMSEHSLELSNLTK	LMSEHSLELSNLTK	125	14	5.30	4514	1	1	0	0	4930774	54860		435	1.6	y7y14	263305	1499	158353398868753	118353398868753	0.0191	Yellow	10920	16018034	16018057	263977	1212	1212.00	2.31	2
1372	NCDO2118_RS07235	heptaprenyl diphosphate synthase subunit II 1508938:1509897 forward MW:35699	Regular	6210584	0.22	356991351	46	10	24	40.44	63596	27432	12544	0	7	Pass2	VarMod	Oxidation M(9);Oxidation M(10)	31325565	LALAASVEMMHIATLVHDDVIDHADTRR	LALAASVEMMHIATLVHDDVIDHADTRR	70	28	5.11	4519	7	7	0	1	6095283	55781		1617	5.2	b6b10b11b13b14b15b16b18y5y10y12y16	338047	2900	24586212605318	123908084035453	0.2467	Yellow	32367	31325731	31325664	361213	15691	15691.00	2.97	3
1372	NCDO2118_RS07235	heptaprenyl diphosphate synthase subunit II 1508938:1509897 forward MW:35699	Regular	6210584	0.22	356991351	46	10	24	40.44	63596	27432	12544	0	8	Pass2	VarMod	Oxidation M(*)	29604604	LALAASVEMMHIATLVHDDVIDHADTR	LALAASVEMMHIATLVHDDVIDHADTR	70	27	4.51	4518	6	6	0	2	6965886	56361		928	2.8	b12b15y8y12y15y27	378848	2752	237424347922423	118282898614949	0.0475	Yellow	38287	29604766	29604718	392341	3018	3018.00	3.00	3
1372	NCDO2118_RS07235	heptaprenyl diphosphate synthase subunit II 1508938:1509897 forward MW:35699	Regular	6210584	0.22	356991351	46	10	24	40.44	63596	27432	12544	0	9	Pass2	VarMod	Oxidation M(2)	16178152	LMSEHSLELSNLTK	LMSEHSLELSNLTK	125	14	5.30	4520	3	3	0	0	3400888	53247		173	1.9	b4b9y4	263305	1499	158353398868753	118353398868753	0.0318	Yellow	25359	16178062	16178084	327262	2022	2022.00	2.00	2
1372	NCDO2118_RS07235	heptaprenyl diphosphate synthase subunit II 1508938:1509897 forward MW:35699	Regular	6210584	0.22	356991351	46	10	24	40.44	63596	27432	12544	0	10	Pass2	VarMod	Phosphoryl STY(2)	9733914	DYPELEK	DYPELEK	9	7	3.83	4517	0	0	0	0	275071	42326	Missing	791	1.3	y2y3y4	142977	799	104101619793603	641016197936026	0.0210	Red	9040	9733944	9733979	253102	1338	1338.00	2.00	2
1372	NCDO2118_RS07235	heptaprenyl diphosphate synthase subunit II 1508938:1509897 forward MW:35699	Regular	6210584	0.22	356991351	46	10	24	40.44	63596	27432	12544	0	11	Pass2	InSource	None	8815091	LLGGELGQL	LLGGELGQLNHHFNLQQTLDDYIENISGK	146	9	3.31	4515	1	1	0	0	2006591	0.0000		35	0.0	b9	364646	863	109588966521453	179177933042906	0.0653	Yellow	35075	8815106	8815131	374961	4151	4151.00	1.00	1
1372	NCDO2118_RS07235	heptaprenyl diphosphate synthase subunit II 1508938:1509897 forward MW:35699	Regular	4844424	0.81	356991351	25	5	24	13.17	48271	45726	13197	1	1	Pass1	PepFrag1	None	12406208	SAIFDIFDAGGK	SAIFDIFDAGGK	37	12	3.88	5051	9	9	5	1	70920780	65360		6251	4.0	b5b12y3y5y6y7y8y9y10y12	309759	1138	131781508793591	917815087935915	0.3664	Green	29272	12406230	12406250	338949	17688	17688.00	1.91	2
1372	NCDO2118_RS07235	heptaprenyl diphosphate synthase subunit II 1508938:1509897 forward MW:35699	Regular	4844424	0.81	356991351	25	5	24	13.17	48271	45726	13197	0	2	Pass1	PepFrag1	None	7464407	GVATLSAK	GVATLSAK	98	8	10.10	5053	6	6	2	1	7309462	55491		3511	3.4	b4b5b5b7b8y3y8	134120	712	964005762446893	152801152489379	0.3498	Yellow	2744	7464415	7464437	202329	16885	16885.00	1.00	1
1372	NCDO2118_RS07235	heptaprenyl diphosphate synthase subunit II 1508938:1509897 forward MW:35699	Regular	4844424	0.81	356991351	25	5	24	13.17	48271	45726	13197	0	3	Pass1	PepFrag1	None	13377311	SYTLSALNLIDK	SYTLSALNLIDK	285	12	6.78	5050	7	7	1	1	50360680	63873		2522	3.4	b3b4b6b8b11y2y8y10	318712	1265	141412125892003	101412125892003	0.2310	Green	22283	13377292	13377309	310869	11153	11153.00	1.94	2
1372	NCDO2118_RS07235	heptaprenyl diphosphate synthase subunit II 1508938:1509897 forward MW:35699	Regular	4844424	0.81	356991351	25	5	24	13.17	48271	45726	13197	0	4	Pass1	PepFrag1	None	12156766	ELVQVQQLMK	ELVQVQQLMK	16	10	7.00	5052	2	2	1	0	3151811	51838		195	1.4	y4*y7y8	246751	1168	134087469870706	940874698707061	0.0246	Red	30154	12156682	12156703	342765	1188	1188.00	2.00	2
1372	NCDO2118_RS07235	heptaprenyl diphosphate synthase subunit II 1508938:1509897 forward MW:35699	Regular	4844424	0.81	356991351	25	5	24	13.17	48271	45726	13197	0	5	Pass2	VarMod	Phosphoryl STY(4);Phosphoryl STY(20)	31485367	QGIYSAPVLFALQENNALVSELIKNEK	QGIYSAPVLFALQENNALVSELIKNEK	236	27	4.56	5054	1	1	0	0	2014704	49895	Missing	718	2.1	b8*y3*y9y9y26-H3PO4	427156	2828	241775656349241	121183770899494	0.0281	Red	33426	31485397	31485320	356178	1357	1357.00	3.23	3
1372	NCDO2118_RS07235	heptaprenyl diphosphate synthase subunit II 1508938:1509897 forward MW:35699	Regular	3271320	1.28	356991351	31	9	24	28.53	225099	161867	12695	1	1	Pass1	PepFrag1	None	17039578	TGELFALSASVAPLISK	TGELFALSASVAPLISK	175	17	7.00	4150	6	6	0	0	2919136	49800	Missing	5186	9.8	b1b3b5b9b14b17y11y17	405484	1631	167518306871258	127518306871258	0.6405	Red	17627	17039579	17039586	316185	144184	144184.00	2.04	2
1372	NCDO2118_RS07235	heptaprenyl diphosphate synthase subunit II 1508938:1509897 forward MW:35699	Regular	3271320	1.28	356991351	31	9	24	28.53	225099	161867	12695	0	2	Pass1	PepFrag1	None	29444655	LALAASVEMMHIATLVHDDVIDHADTR	LALAASVEMMHIATLVHDDVIDHADTR	70	27	4.51	4147	3	3	0	0	4219636	51400		913	4.4	b6b9b10b12b15b25y1y4y8	400342	2752	237424347922423	118282898614949	0.0450	Red	32878	29444897	29444837	403701	10134	10134.00	2.85	3
1372	NCDO2118_RS07235	heptaprenyl diphosphate synthase subunit II 1508938:1509897 forward MW:35699	Regular	3271320	1.28	356991351	31	9	24	28.53	225099	161867	12695	0	3	Pass1	PepFrag1	None	12406208	SAIFDIFDAGGK	SAIFDIFDAGGK	37	12	3.88	4146	7	7	5	2	42693760	61451		2175	2.9	b4b5b9y5y6y7y8y9y10	304597	1138	131781508793591	917815087935915	0.0335	Green	22597	12406216	12406241	339535	7549	7549.00	2.00	2
1372	NCDO2118_RS07235	heptaprenyl diphosphate synthase subunit II 1508938:1509897 forward MW:35699	Regular	3271320	1.28	356991351	31	9	24	28.53	225099	161867	12695	0	4	Pass1	PepFrag1	None	13377311	SYTLSALNLIDK	SYTLSALNLIDK	285	12	6.78	4145	3	3	1	0	21210630	58413		1396	2.8	b2b3b4y8y10	316641	1265	141412125892003	101412125892003	0.0283	Green	16699	13377188	13377211	312494	6365	6365.00	2.00	2
1372	NCDO2118_RS07235	heptaprenyl diphosphate synthase subunit II 1508938:1509897 forward MW:35699	Regular	3271320	1.28	356991351	31	9	24	28.53	225099	161867	12695	0	5	Pass1	PepFrag1	None	7464407	GVATLSAK	GVATLSAK	98	8	10.10	4148	3	3	0	1	3857318	51010		760	1.8	b5b5y3y8	126227	712	964005762446893	152801152489379	0.0140	Red	1854	7464367	7464387	200675	3143	3143.00	1.00	1
1372	NCDO2118_RS07235	heptaprenyl diphosphate synthase subunit II 1508938:1509897 forward MW:35699	Regular	3271320	1.28	356991351	31	9	24	28.53	225099	161867	12695	0	6	Pass2	PepFrag2	None	16018203	LMSEHSLELSNLTK	LMSEHSLELSNLTK	125	14	5.30	4149	2	2	0	0	5877477	52839		963	1.7	y5y7y12*y14	274330	1499	158353398868753	118353398868753	0.0062	Yellow	8263	16018048	16018060	266290	1403	1403.00	2.00	2
1372	NCDO2118_RS07235	heptaprenyl diphosphate synthase subunit II 1508938:1509897 forward MW:35699	Regular	3271320	1.28	356991351	31	9	24	28.53	225099	161867	12695	0	7	Pass2	VarMod	Oxidation M(9);Oxidation M(10)	31325565	LALAASVEMMHIATLVHDDVIDHADTRR	LALAASVEMMHIATLVHDDVIDHADTRR	70	28	5.11	4151	6	6	0	1	12692190	56183		1025	8.0	b9b11b12b28y8y12y16y28	363835	2900	24586212605318	123908084035453	0.2248	Yellow	27721	31325748	31325664	366621	50596	50596.00	3.00	3
1372	NCDO2118_RS07235	heptaprenyl diphosphate synthase subunit II 1508938:1509897 forward MW:35699	Regular	3271320	1.28	356991351	31	9	24	28.53	225099	161867	12695	0	8	Pass2	VarMod	Phosphoryl STY(1)	17839241	TGELFALSASVAPLISK	TGELFALSASVAPLISK	175	17	7.00	4152	0	0	0	0	2007007	48173	Missing	150	1.6	y7y10	405484	1631	167518306871258	127518306871258	0.0042	Red	22627	17839258	17839261	339709	944	944.00	2.00	2
1372	NCDO2118_RS07235	heptaprenyl diphosphate synthase subunit II 1508938:1509897 forward MW:35699	Regular	3271320	1.28	356991351	31	9	24	28.53	225099	161867	12695	0	9	Pass2	VarMod	Phosphoryl STY(5)	14176974	SYTLSALNLIDK	SYTLSALNLIDK	285	12	6.78	4153	1	1	0	0	1349876	46450		127	1.3	b9-H3PO4y3	316641	1265	141412125892003	101412125892003	0.0035	Red	13292	14176982	14177002	296068	781	781.00	2.00	2
1373	NCDO2118_RS07240	ribosomal RNA small subunit methyltransferase G 1509894:1510610 forward MW:26892	Regular	9628451	0	268921515	29	7	21	20.17	33218	25888	12184	1	1	Pass1	PepFrag1	None	10025830	INLTAITEK	INLTAITEK	38	9	7.00	2610	10	10	5	2	157678900	71813		5584	3.1	b2b2*b3b9y1y3y5y6y7y8y8*y9	201046	965	118062282835673	780622828356733	0.3570	Green	2711	10025770	10025798	214376	11859	11859.00	1.60	2
1373	NCDO2118_RS07240	ribosomal RNA small subunit methyltransferase G 1509894:1510610 forward MW:26892	Regular	9628451	0	268921515	29	7	21	20.17	33218	25888	12184	0	2	Pass1	PepFrag1	None	8595288	IIFPELK	IIFPELK	89	7	7.00	2613	4	4	1	1	37291860	65552	Identified	2696	2.7	b2y4y5y6y7	247174	841	107718500225371	175437000450743	0.3138	Green	11654	8595301	8595319	286916	10423	10423.00	1.27	1
1373	NCDO2118_RS07240	ribosomal RNA small subunit methyltransferase G 1509894:1510610 forward MW:26892	Regular	9628451	0	268921515	29	7	21	20.17	33218	25888	12184	0	3	Pass1	PepFrag1	None	24813711	INFLSLLTEELGLENVTLLHGR	INFLSLLTEELGLENVTLLHGR	106	22	4.53	2611	6	6	1	0	21648900	63190		1067	2.8	b3b11*b12*y4y15y16y18y20	500229	2372	215031833160161	103354555440107	0.1086	Green	39872	24813662	24813652	509031	3606	3606.00	3.00	3
1373	NCDO2118_RS07240	ribosomal RNA small subunit methyltransferase G 1509894:1510610 forward MW:26892	Regular	9628451	0	268921515	29	7	21	20.17	33218	25888	12184	0	4	Pass1	PepFrag1	None	10025830	VTIIDSLNK	VTIIDSLNK	96	9	6.78	2609	4	4	2	1	13288620	61070		1378	1.8	b2y4*y6y7y8	214093	965	118062282835673	780622828356733	0.0778	Green	2373	10025751	10025780	209517	2583	2583.00	2.00	2
1373	NCDO2118_RS07240	ribosomal RNA small subunit methyltransferase G 1509894:1510610 forward MW:26892	Regular	9628451	0	268921515	29	7	21	20.17	33218	25888	12184	0	5	Pass2	PepFrag2	None	14697311	YFELLVEWNEK	YFELLVEWNEK	27	11	3.96	2612	1	1	0	0	863904	49200		137	2.0	y6y6*y8	367078	1350	147677890430846	107677890430846	0.0806	Red	35693	14697431	14697449	437831	2678	2678.00	2.00	2
1373	NCDO2118_RS07240	ribosomal RNA small subunit methyltransferase G 1509894:1510610 forward MW:26892	Regular	9628451	0	268921515	29	7	21	20.17	33218	25888	12184	0	6	Pass2	PepFrag2	None	17798912	FIKEVAYELPNGDER	FIKEVAYELPNGDER	195	15	4.16	2615	1	1	0	0	402762	45886	Missing	155	1.7	y2y4	246116	1631	167518306871258	716788712475054	0.0393	Red	21874	17799184	17799220	335446	1306	1306.00	3.00	3
1373	NCDO2118_RS07240	ribosomal RNA small subunit methyltransferase G 1509894:1510610 forward MW:26892	Regular	9628451	0	268921515	29	7	21	20.17	33218	25888	12184	0	7	Pass2	VarMod	Phosphoryl STY(9)	27174386	RINFLSLLTEELGLENVTLLHGR	RINFLSLLTEELGLENVTLLHGR	105	23	5.40	2614	3	3	0	0	2005473	52858		1167	1.6	b4b7*b10b10b15b18y3y17-H3PO4	441342	2520	223885857810224	109257238540149	0.0230	Yellow	8856	27174393	27174359	269345	763	763.00	3.28	3
1373	NCDO2118_RS07240	ribosomal RNA small subunit methyltransferase G 1509894:1510610 forward MW:26892	Regular	2875639	1.77	268921515	22	9	21	12.18	33069	8931	6127	1	1	Pass1	PepFrag1	None	24813711	INFLSLLTEELGLENVTLLHGR	INFLSLLTEELGLENVTLLHGR	106	22	4.53	5927	5	5	2	0	22171090	58045		805	2.6	b2b3b5y11y15y16y18	485109	2372	215031833160161	103354555440107	0.0900	Yellow	46290	24813778	24813774	508844	2977	2977.00	3.00	3
1373	NCDO2118_RS07240	ribosomal RNA small subunit methyltransferase G 1509894:1510610 forward MW:26892	Regular	2875639	1.77	268921515	22	9	21	12.18	33069	8931	6127	0	2	Pass2	PepFrag2	None	8595288	IIFPELK	IIFPELK	89	7	7.00	5928	6	6	1	1	23325220	58266	Identified	3299	3.2	b2b4b6y4y5y7	245798	841	107718500225371	175437000450743	0.4771	Yellow	15235	8595332	8595357	284428	15776	15776.00	1.28	1
1373	NCDO2118_RS07240	ribosomal RNA small subunit methyltransferase G 1509894:1510610 forward MW:26892	Regular	2875639	1.77	268921515	22	9	21	12.18	33069	8931	6127	0	3	Pass2	PepFrag2	None	10025830	VTIIDSLNK	VTIIDSLNK	96	9	6.78	5933	0	0	0	0	1314721	45776		43	2.0	y5	211252	965	118062282835673	196124565671347	0.1049	Red	24959	10025480	10025504	325746	3468	3468.00	1.00	1
1373	NCDO2118_RS07240	ribosomal RNA small subunit methyltransferase G 1509894:1510610 forward MW:26892	Regular	2875639	1.77	268921515	22	9	21	12.18	33069	8931	6127	0	4	Pass2	PepFrag2	None	17798912	FIKEVAYELPNGDER	FIKEVAYELPNGDER	195	15	4.16	5934	3	3	0	0	777645	43495	Missing	154	1.9	b6y1y7y8*	248806	1631	167518306871258	716788712475054	0.0526	Red	31026	17799321	17799356	354710	1738	1738.00	3.00	3
1373	NCDO2118_RS07240	ribosomal RNA small subunit methyltransferase G 1509894:1510610 forward MW:26892	Regular	2875639	1.77	268921515	22	9	21	12.18	33069	8931	6127	0	5	Pass2	PepFrag2	None	15078770	LSVLTEFTIPFLK	LSVLTEFTIPFLK	152	13	7.00	5935	1	1	0	0	758790	43389	Missing	199	1.7	b3y10y11	416471	1464	155878787389721	115878787389721	0.0477	Red	37723	15079101	15079127	389377	1577	1577.00	2.00	2
1373	NCDO2118_RS07240	ribosomal RNA small subunit methyltransferase G 1509894:1510610 forward MW:26892	Regular	2875639	1.77	268921515	22	9	21	12.18	33069	8931	6127	0	6	Pass2	MissedCleavage	None	26693379	MTPDEFLSALTEFDIQLSDKQIK	MTPDEFLSALTEFDIQLSDKQIK	0	23	3.86	5929	0	0	0	0	3158428	49582	Missing	43	1.7	y8	415485	2492	222224357646931	108149571764621	0.0267	Red	42740	26693254	26693235	446976	884	884.00	3.00	3
1373	NCDO2118_RS07240	ribosomal RNA small subunit methyltransferase G 1509894:1510610 forward MW:26892	Regular	2875639	1.77	268921515	22	9	21	12.18	33069	8931	6127	0	7	Pass2	MissedCleavage	None	22031605	NGILLSLKAAQFEEELNDAK	NGILLSLKAAQFEEELNDAK	166	20	4.16	5930	1	1	0	0	1891938	47356		318	1.6	b15b17*y9	397771	2071	196432359560834	156432359560834	0.0242	Red	43937	22031568	22031553	462789	801	801.00	2.32	2
1373	NCDO2118_RS07240	ribosomal RNA small subunit methyltransferase G 1509894:1510610 forward MW:26892	Regular	2875639	1.77	268921515	22	9	21	12.18	33069	8931	6127	0	8	Pass2	VarMod	Oxidation M(1)	26853328	MTPDEFLSALTEFDIQLSDKQIK	MTPDEFLSALTEFDIQLSDKQIK	0	23	3.86	5932	3	3	0	0	5584521	52057	Missing	291	3.0	b9b14y3y8y11*y12	415485	2492	222224357646931	108149571764621	0.1283	Red	41954	26853373	26853352	436842	4243	4243.00	2.56	3
1373	NCDO2118_RS07240	ribosomal RNA small subunit methyltransferase G 1509894:1510610 forward MW:26892	Regular	2875639	1.77	268921515	22	9	21	12.18	33069	8931	6127	0	9	Pass2	VarMod	Phosphoryl STY(6)	10825493	VTIIDSLNK	VTIIDSLNK	96	9	6.78	5931	3	3	1	0	2333049	48267		975	1.5	y3y3*y5y7*y8y9	211252	965	118062282835673	196124565671347	0.0485	Red	15273	10825534	10825556	284542	1605	1605.00	1.40	1
1375	NCDO2118_RS07250	orotidine 5'-phosphate decarboxylase 1511092:1511805 reverse MW:26097	Regular	22143490	0	262111162	21	2	19	16.88	88617	132925.5	33590	1	1	Pass1	PepFrag1	Carbamidomethyl C(11)	18708964	TAQAGLDGVVCSAHEVEK	TAQAGLDGVVCSAHEVEK	151	18	4.42	560	19	19	14	3	289401000	78067		33307	8.3	b1b2b3b4b4b5b5b6b14*b18b18*y1y2y3y4y4y5y5y7y8y8y9y9y10y10y11y11y12y12y13y14y14y15y16y16*y17*	200500	1664	169770351887887	731802345919244	0.9792	Green	8312	18708837	18708847	201460	86773	86773.00	3.00	3
1375	NCDO2118_RS07250	orotidine 5'-phosphate decarboxylase 1511092:1511805 reverse MW:26097	Regular	22143490	0	262111162	21	2	19	16.88	88617	132925.5	33590	0	2	Pass1	PepFrag1	None	22551457	LGVDMVNVHAAGGVEMMVAAKR	LGVDMVNVHAAGGVEMMVAAKR	80	22	7.82	561	2	2	0	0	1763131	55915		283	2.2	b5b7*y8	286143	2130	200145595146548	934303967643653	0.0208	Yellow	9885	22551417	22551406	216547	1844	1844.00	3.00	3
1375	NCDO2118_RS07250	orotidine 5'-phosphate decarboxylase 1511092:1511805 reverse MW:26097	Regular	8477322	0	262111162	14	3	19	16.03	24364	61932	8482	1	1	Pass1	PepFrag1	Carbamidomethyl C(11)	18708964	TAQAGLDGVVCSAHEVEK	TAQAGLDGVVCSAHEVEK	151	18	4.42	1364	11	11	6	1	111389700	69751		6761	4.9	b1b3b8b8*y2y4y6y8y9y11y12y12y13y14y15y16y16*	193922	1664	169770351887887	731802345919244	0.8473	Green	6974	18708937	18708945	201589	20644	20644.00	3.00	3
1375	NCDO2118_RS07250	orotidine 5'-phosphate decarboxylase 1511092:1511805 reverse MW:26097	Regular	8477322	0	262111162	14	3	19	16.03	24364	61932	8482	0	2	Pass2	PepFrag2	None	11005735	DPVASYHAIK	DPVASYHAIK	222	10	7.74	1365	1	1	0	0	411133	45422	Missing	100	1.9	b6y1	150147	1011	12178498246261	817849824626101	0.1118	Red	2196	11005837	11005858	153165	2724	2724.00	2.00	2
1375	NCDO2118_RS07250	orotidine 5'-phosphate decarboxylase 1511092:1511805 reverse MW:26097	Regular	8477322	0	262111162	14	3	19	16.03	24364	61932	8482	0	3	Pass2	VarMod	Phosphoryl STY(5)	23290993	LIAVTQLTSTSEEIMQNDQK	LIAVTQLTSTSEEIMQNDQK	116	20	3.83	1366	2	2	0	0	4617169	55926		1621	1.7	b7b9b13y6*y19y20y20*	274893	2099	198198909166462	921326061109748	0.0409	Green	13742	23290805	23290792	265760	996	996.00	2.62	3
1375	NCDO2118_RS07250	orotidine 5'-phosphate decarboxylase 1511092:1511805 reverse MW:26097	Regular	2469736	0	262111162	11	2	19	7.59	61115	29796	3096	1	1	Pass1	PepFrag1	Carbamidomethyl C(11)	18708964	TAQAGLDGVVCSAHEVEK	TAQAGLDGVVCSAHEVEK	151	18	4.42	288	10	10	5	2	32057700	58986		1908	3.8	b2b3y2y7y8y9y11y14y15y16y16	183934	1664	169770351887887	731802345919244	0.1625	Yellow	3411	18709014	18708994	200712	9932	9932.00	3.00	3
1375	NCDO2118_RS07250	orotidine 5'-phosphate decarboxylase 1511092:1511805 reverse MW:26097	Regular	2469736	0	262111162	11	2	19	7.59	61115	29796	3096	0	2	Pass2	PepFrag2	None	9565160	GLEAGTPVGR	GLEAGTPVGR	102	10	7.00	289	1	1	0	0	828884	43111	Identified	1188	5.5	b2b3b5b6y9	124738	880	111023457736826	710234577368262	0.8375	Red	1122	9565363	9565394	128181	51183	51183.00	2.00	2
1375	NCDO2118_RS07250	orotidine 5'-phosphate decarboxylase 1511092:1511805 reverse MW:26097	Regular	12396830	0	262111162	14	4	19	19.41	73453	64455	4689	1	1	Pass1	PepFrag1	Carbamidomethyl C(11)	18708964	TAQAGLDGVVCSAHEVEK	TAQAGLDGVVCSAHEVEK	151	18	4.42	1351	12	12	7	2	162586500	73044		4001	5.0	b2b3b4y1y6y7y8y9y11y12y14y15y16	192156	1664	169770351887887	731802345919244	0.2925	Green	7025	18708950	18708974	199139	21485	21485.00	3.00	3
1375	NCDO2118_RS07250	orotidine 5'-phosphate decarboxylase 1511092:1511805 reverse MW:26097	Regular	12396830	0	262111162	14	4	19	19.41	73453	64455	4689	0	2	Pass2	PepFrag2	None	14987319	LHDIPNTVESSMR	LHDIPNTVESSMR	63	13	5.22	1354	0	0	0	0	884023	50398	Missing	35	1.3	y7	187003	1368	148987682849316	593251218995442	0.0103	Yellow	3498	14987631	14987668	167832	754	754.00	3.00	3
1375	NCDO2118_RS07250	orotidine 5'-phosphate decarboxylase 1511092:1511805 reverse MW:26097	Regular	12396830	0	262111162	14	4	19	19.41	73453	64455	4689	0	3	Pass2	MissedCleavage	None	17288340	DPVASYHAIKAEWNQ	DPVASYHAIKAEWNQ	222	15	5.22	1352	1	1	0	0	2029057	54006	Missing	34	2.1	y7	226946	1560	162620777490575	122620777490575	0.0322	Yellow	9315	17288223	17288233	217540	2364	2364.00	2.00	2
1375	NCDO2118_RS07250	orotidine 5'-phosphate decarboxylase 1511092:1511805 reverse MW:26097	Regular	12396830	0	262111162	14	4	19	19.41	73453	64455	4689	0	4	Pass2	VarMod	Phosphoryl STY(11)	20179889	LHDIPNTVESSMRVLAR	LHDIPNTVESSMRVLAR	63	17	7.85	1353	1	1	0	0	355516	46442	Missing	619	6.6	b6b8b17y7	244487	1812	179693249800227	139693249800227	0.6651	Red	20130	20180007	20179998	383744	48850	48850.00	2.00	2
1375	NCDO2118_RS07250	orotidine 5'-phosphate decarboxylase 1511092:1511805 reverse MW:26097	Regular	5119776	0	262111162	18	8	19	22.78	56602	40539	9790	1	1	Pass1	PepFrag1	None	12156732	SLGHSVFLDLK	SLGHSVFLDLK	52	11	7.82	5765	8	8	2	1	85697820	66422		7481	4.9	b4b7b11y2y3y6y7y8y9y11	270757	1150	132706296038843	927062960388432	0.5764	Green	13035	12156693	12156721	260922	32627	32627.00	2.02	2
1375	NCDO2118_RS07250	orotidine 5'-phosphate decarboxylase 1511092:1511805 reverse MW:26097	Regular	5119776	0	262111162	18	8	19	22.78	56602	40539	9790	0	2	Pass1	PepFrag1	Carbamidomethyl C(4)	17749157	EFICLTPGIRPEGASK	EFICLTPGIRPEGASK	176	16	6.44	5766	5	5	1	0	12445620	58043	Identified	1240	2.9	b2b7y5y10y12y13	214440	1603	165595545103273	703970300688488	0.0967	Yellow	11368	17749082	17749117	253454	5474	5474.00	2.76	3
1375	NCDO2118_RS07250	orotidine 5'-phosphate decarboxylase 1511092:1511805 reverse MW:26097	Regular	5119776	0	262111162	18	8	19	22.78	56602	40539	9790	0	3	Pass1	PepFrag1	None	28995676	TIGSDYIVVGRPITQAKDPVASYHAIK	TIGSDYIVVGRPITQAKDPVASYHAIK	205	27	9.47	5767	0	0	0	0	2541523	51143	Identified	175	2.6	b14b18b25*	268785	2734	236387935466014	196387935466014	0.0431	Red	45716	28995710	28995613	407812	2438	2438.00	2.00	2
1375	NCDO2118_RS07250	orotidine 5'-phosphate decarboxylase 1511092:1511805 reverse MW:26097	Regular	5119776	0	262111162	18	8	19	22.78	56602	40539	9790	0	4	Pass2	PepFrag2	None	6472784	AEWNQ	AEWNQ	232	5	3.31	5772	1	1	0	0	591926	44815		101	2.0	b3b3	126063	549	810602360015765	122120472003153	0.1175	Red	3332	6472967	6472990	203178	6653	6653.00	1.00	1
1375	NCDO2118_RS07250	orotidine 5'-phosphate decarboxylase 1511092:1511805 reverse MW:26097	Regular	5119776	0	262111162	18	8	19	22.78	56602	40539	9790	0	5	Pass2	MissedCleavage	None	26953872	SLGHSVFLDLKLHDIPNTVESSMR	SLGHSVFLDLKLHDIPNTVESSMR	52	24	6.03	5768	2	2	0	0	3454001	52476	Identified	347	3.2	b9y9y10*y14	345896	2518	223767384009804	718836920049022	0.0808	Red	21219	26953910	26953916	292117	4574	4574.00	3.68	4
1375	NCDO2118_RS07250	orotidine 5'-phosphate decarboxylase 1511092:1511805 reverse MW:26097	Regular	5119776	0	262111162	18	8	19	22.78	56602	40539	9790	0	6	Pass2	MissedCleavage	None	17288340	DPVASYHAIKAEWNQ	DPVASYHAIKAEWNQ	222	15	5.22	5770	1	1	0	0	1178364	47805	Missing	31	2.1	y8	247255	1560	162620777490575	122620777490575	0.0439	Red	6475	17288443	17288453	226305	2482	2482.00	2.00	2
1375	NCDO2118_RS07250	orotidine 5'-phosphate decarboxylase 1511092:1511805 reverse MW:26097	Regular	5119776	0	262111162	18	8	19	22.78	56602	40539	9790	0	7	Pass2	MissedCleavage	None	19380226	LHDIPNTVESSMRVLAR	LHDIPNTVESSMRVLAR	63	17	7.85	5769	1	1	0	0	1795222	49634	Missing	254	1.8	b10y9	220420	1812	179693249800227	797954998668183	0.0241	Red	7029	19380202	19380228	229492	1363	1363.00	3.00	3
1375	NCDO2118_RS07250	orotidine 5'-phosphate decarboxylase 1511092:1511805 reverse MW:26097	Regular	5119776	0	262111162	18	8	19	22.78	56602	40539	9790	0	8	Pass2	VarMod	Phosphoryl STY(4)	18979783	TIGSDYIVVGRPITQAK	TIGSDYIVVGRPITQAK	205	17	9.72	5771	0	0	0	0	3118949	52033	Missing	161	1.6	y12*y15*y15	233033	1723	173760004501375	133760004501375	0.0175	Red	51626	18979707	18979707	466256	991	991.00	2.00	2
1375	NCDO2118_RS07250	orotidine 5'-phosphate decarboxylase 1511092:1511805 reverse MW:26097	Regular	15352610	0	262111162	29	7	19	32.07	176217	91099.5	33491	1	1	Pass1	PepFrag1	Carbamidomethyl C(11)	18708964	TAQAGLDGVVCSAHEVEK	TAQAGLDGVVCSAHEVEK	151	18	4.42	740	15	15	8	4	200464200	74882		19175	7.3	b1b2b2b3b4b5b6y2y2y4y4y5y5y6y7y8y9y9y11y12y13y14y15y16y16y17*y18*	191742	1664	169770351887887	731802345919244	0.3382	Green	7376	18708901	18708913	200744	59602	59602.00	3.00	3
1375	NCDO2118_RS07250	orotidine 5'-phosphate decarboxylase 1511092:1511805 reverse MW:26097	Regular	15352610	0	262111162	29	7	19	32.07	176217	91099.5	33491	0	2	Pass1	PepFrag1	None	14987319	LHDIPNTVESSMR	LHDIPNTVESSMR	63	13	5.22	739	1	1	0	0	810146	50947	Missing	276	1.5	b3b10*y3y7	185858	1368	148987682849316	593251218995442	0.0064	Yellow	3226	14987376	14987394	160186	1131	1131.00	2.65	3
1375	NCDO2118_RS07250	orotidine 5'-phosphate decarboxylase 1511092:1511805 reverse MW:26097	Regular	15352610	0	262111162	29	7	19	32.07	176217	91099.5	33491	0	3	Pass2	PepFrag2	None	11005735	DPVASYHAIK	DPVASYHAIK	222	10	7.74	741	2	2	0	0	1281624	52939	Missing	69	1.3	b8y7	147405	1011	12178498246261	817849824626101	0.0054	Yellow	5010	11005813	11005840	178052	959	959.00	2.00	2
1375	NCDO2118_RS07250	orotidine 5'-phosphate decarboxylase 1511092:1511805 reverse MW:26097	Regular	15352610	0	262111162	29	7	19	32.07	176217	91099.5	33491	0	4	Pass2	PepFrag2	None	12156732	SLGHSVFLDLK	SLGHSVFLDLK	52	11	7.82	745	2	2	0	0	623922	49813		283	1.3	y4y8	266414	1150	132706296038843	927062960388432	0.0048	Yellow	10469	12156435	12156461	234193	838	838.00	2.00	2
1375	NCDO2118_RS07250	orotidine 5'-phosphate decarboxylase 1511092:1511805 reverse MW:26097	Regular	15352610	0	262111162	29	7	19	32.07	176217	91099.5	33491	0	5	Pass2	MissedCleavage	None	17288340	DPVASYHAIKAEWNQ	DPVASYHAIKAEWNQ	222	15	5.22	742	3	3	0	0	3237802	56964	Missing	1298	2.0	b6b8y12	238624	1560	162620777490575	122620777490575	0.0121	Green	8992	17288138	17288150	218053	2127	2127.00	2.00	2
1375	NCDO2118_RS07250	orotidine 5'-phosphate decarboxylase 1511092:1511805 reverse MW:26097	Regular	15352610	0	262111162	29	7	19	32.07	176217	91099.5	33491	0	6	Pass2	VarMod	Phosphoryl STY(9)	19519089	DFLEKFDPSEQLYIK	DFLEKFDPSEQLYIK	19	15	4.06	743	2	2	0	0	3206133	56922	Identified	12053	7.6	b7y7*y7y13y15	342643	1730	174230307433588	134230307433588	0.4577	Green	13031	19519091	19519093	268616	80647	80647.00	2.16	2
1375	NCDO2118_RS07250	orotidine 5'-phosphate decarboxylase 1511092:1511805 reverse MW:26097	Regular	15352610	0	262111162	29	7	19	32.07	176217	91099.5	33491	0	7	Pass2	VarMod	Phosphoryl STY(11)	20179889	LHDIPNTVESSMRVLAR	LHDIPNTVESSMRVLAR	63	17	7.85	744	4	4	1	0	1450367	53477	Missing	337	5.6	b6b10b11b17	253556	1812	179693249800227	139693249800227	0.1754	Yellow	16709	20179999	20179997	384036	30913	30913.00	2.01	2
1375	NCDO2118_RS07250	orotidine 5'-phosphate decarboxylase 1511092:1511805 reverse MW:26097	Regular	15094630	0	262111162	19	4	19	27.43	91693	150924	15495	1	1	Pass1	PepFrag1	Carbamidomethyl C(11)	18708964	TAQAGLDGVVCSAHEVEK	TAQAGLDGVVCSAHEVEK	151	18	4.42	607	14	14	9	2	197842700	74751		13051	6.8	b2b3b4b8*b9y1y2y4y5y5y7y8y8y9y10y10y11y11y12y12y13y14y15y16y16y17*y18*	193804	1664	169770351887887	731802345919244	0.5487	Green	6203	18708905	18708915	200106	50308	50308.00	3.00	3
1375	NCDO2118_RS07250	orotidine 5'-phosphate decarboxylase 1511092:1511805 reverse MW:26097	Regular	15094630	0	262111162	19	4	19	27.43	91693	150924	15495	0	2	Pass2	PepFrag2	None	28995676	TIGSDYIVVGRPITQAKDPVASYHAIK	TIGSDYIVVGRPITQAKDPVASYHAIK	205	27	9.47	610	1	1	0	0	602158	49585	Identified	156	1.8	b11	284911	2734	236387935466014	545551741864055	0.0100	Yellow	9310	28995108	28995108	235667	921	921.00	5.00	5
1375	NCDO2118_RS07250	orotidine 5'-phosphate decarboxylase 1511092:1511805 reverse MW:26097	Regular	15094630	0	262111162	19	4	19	27.43	91693	150924	15495	0	3	Pass2	VarMod	Phosphoryl STY(9)	19519089	DFLEKFDPSEQLYIK	DFLEKFDPSEQLYIK	19	15	4.06	608	3	3	0	0	3742791	57520	Identified	1430	5.8	b7b9b12b15y7-H3PO4y8*y9*y14*	338289	1730	174230307433588	134230307433588	0.4284	Green	11600	19519184	19519181	268113	39280	39280.00	2.15	2
1375	NCDO2118_RS07250	orotidine 5'-phosphate decarboxylase 1511092:1511805 reverse MW:26097	Regular	15094630	0	262111162	19	4	19	27.43	91693	150924	15495	0	4	Pass2	VarMod	Phosphoryl STY(*)	18088003	DPVASYHAIKAEWNQ	DPVASYHAIKAEWNQ	222	15	5.22	609	1	1	0	0	1398943	53246	Missing	858	1.6	b3y2*y6y7y15	230754	1560	162620777490575	122620777490575	0.0129	Yellow	14491	18088018	18088022	344883	1184	1184.00	2.00	2
1375	NCDO2118_RS07250	orotidine 5'-phosphate decarboxylase 1511092:1511805 reverse MW:26097	Regular	3249325	0.74	262111162	4	2	19	7.59	7509	18021	1008	1	1	Pass1	PepFrag1	Carbamidomethyl C(11)	18708964	TAQAGLDGVVCSAHEVEK	TAQAGLDGVVCSAHEVEK	151	18	4.42	1683	4	4	1	0	41329040	61280		946	3.1	b1b6b9*y8y9y12y15y16	199672	1664	169770351887887	731802345919244	0.8000	Green	4992	18708961	18708976	200776	6007	6007.00	3.00	3
1375	NCDO2118_RS07250	orotidine 5'-phosphate decarboxylase 1511092:1511805 reverse MW:26097	Regular	3249325	0.74	262111162	4	2	19	7.59	7509	18021	1008	0	2	Pass2	PepFrag2	None	18180120	TIGSDYIVVGRPITQAK	TIGSDYIVVGRPITQAK	205	17	9.72	1684	0	0	0	0	1539250	46991	Missing	62	1.9	b3y15	262028	1723	173760004501375	133760004501375	0.2000	Red	5016	18180354	18180346	200925	1502	1502.00	2.00	2
[truncated: 39,540 more rows]
[truncated: 11 more columns]
