# Supplementary material for: Quantitative Proteomic Analysis of the Response of Probiotic Putative Lactococcus lactis NCDO 2118 Strain to Different Oxygen Availability Under Temperature Variation
Source: Front Microbiol. 2019 Apr 11;10:759. doi: 10.3389/fmicb.2019.00759 (PMC6470185; doi:10.3389/fmicb.2019.00759)
Supplement: FILE S5 (TABLE 4) — Total list of peptide and proteins identified in NAE conditions. [file Table_4.xlsx]

## Sheet: Plan1
Table 4: Total list of peptide and proteins identified in NAE conditions.
protein.Entry	protein.Description	protein.dataBaseType	protein.score	protein.falsePositiveRate	protein.avgMass	protein.MatchedProducts	protein.matchedPeptides	protein.digestPeps	protein.seqCover(%)	protein.MatchedPeptideIntenSum	protein.top3MatchedPeptideIntenSum	protein.MatchedProductIntenSum	protein.SumForTotalProteins	peptide.Rank	peptide.Pass	peptide.matchType	peptide.modification	peptide.mhp	peptide.seq	peptide.OriginatingSeq	peptide.seqStart	peptide.seqLength	peptide.pI	peptide.componentID	peptide.MatchedProducts	peptide.UniqueProducts	peptide.ConsectiveMatchedProducts	peptide.ComplementaryMatchedProducts	peptide.rawScore	peptide.score	peptide.(X)-P Bond	peptide.MatchedProductsSumInten	peptide.MatchedProductsTheoretical	peptide.MatchedProductsString	peptide.ModelRT	peptide.Volume	peptide.CSA	peptide.ModelDrift	peptide.RelIntensity	peptide.AutoCurate	precursor.leID	precursor.mhp	precursor.mhpCal	precursor.retT	precursor.inten	precursor.calcInten	precursor.charge	precursor.z	precursor.mz
NCDO2118_RS00005	chromosomal replication initiator protein DnaA 575:1942 forward MW:51461	Regular	10521580	0	514610558	27	10	40	20.66	102602	19354	48866	1	1	Pass1	PepFrag1	None	13406805	IPQELNNLEDR	IPQELNNLEDR	256	11	3.83	695	12	12	7	3	402928200	76273	Identified	7844	3.6	b4b4*b7b7*b9y2y3y4y6y7y8y8y9y9*y9y10y11y11*	214106	1225	13841517091563	984151709156301	0.1398	Green	6051	13406788	13406798	204307	14347	14347.00	2.00	2	6708431
NCDO2118_RS00005	chromosomal replication initiator protein DnaA 575:1942 forward MW:51461	Regular	10521580	0	514610558	27	10	40	20.66	102602	19354	48866	0	2	Pass1	PepFrag1	None	10755742	GSQIVLTSDR	GSQIVLTSDR	246	10	7.00	693	2	2	1	0	8958417	59743		819	2.0	b3b10y5y6y8*	189583	993	120335139710428	803351397104284	0.0302	Green	3162	10755699	10755717	165503	3101	3101.00	2.00	2	5382886
NCDO2118_RS00005	chromosomal replication initiator protein DnaA 575:1942 forward MW:51461	Regular	10521580	0	514610558	27	10	40	20.66	102602	19354	48866	0	3	Pass1	PepFrag1	None	9034530	ASLNENQK	ASLNENQK	1	8	7.00	696	1	1	0	0	536348	47515		140	1.5	b8y5	97266	814	105400475656562	654004756565616	0.0186	Red	2854	9034547	9034567	160864	1906	1906.00	1.68	2	4522310
NCDO2118_RS00005	chromosomal replication initiator protein DnaA 575:1942 forward MW:51461	Regular	10521580	0	514610558	27	10	40	20.66	102602	19354	48866	0	4	Pass1	PepFrag1	None	23671173	MIDYELYANDELTELELHR	MIDYELYANDELTELELHR	74	19	3.82	697	3	3	0	0	1761686	52680		1443	1.9	b9b12y9y19y19*	335304	2166	202394451467605	162394451467605	0.0147	Yellow	11896	23671298	23671233	337919	1513	1513.00	2.43	2	11840685
NCDO2118_RS00005	chromosomal replication initiator protein DnaA 575:1942 forward MW:51461	Regular	10521580	0	514610558	27	10	40	20.66	102602	19354	48866	0	5	Pass1	PepFrag1	None	14456114	NQMENFENTYR	NQMENFENTYR	202	11	4.26	694	4	4	1	1	13190210	61423		259	1.5	b2y5y8y9	194419	1261	141113866590153	101113866590153	0.0122	Green	5463	14456122	14456127	197510	1250	1250.00	2.00	2	7233097
NCDO2118_RS00005	chromosomal replication initiator protein DnaA 575:1942 forward MW:51461	Regular	10521580	0	514610558	27	10	40	20.66	102602	19354	48866	0	6	Pass2	PepFrag2	None	10344935	MASLNENQK	MASLNENQK	0	9	7.00	700	2	2	1	0	3043855	55055		37568	6.1	b5*b5b8b9*y7*y8y9	125804	938	115849685671389	758496856713894	0.7303	Yellow	2482	10345061	10345080	155750	74927	74927.00	2.00	2	5177567
NCDO2118_RS00005	chromosomal replication initiator protein DnaA 575:1942 forward MW:51461	Regular	10521580	0	514610558	27	10	40	20.66	102602	19354	48866	0	7	Pass2	PepFrag2	None	14146921	LNNQSSIEEQPR	LNNQSSIEEQPR	93	12	4.26	701	3	3	0	0	2333544	53901	Missing	678	2.0	b5b12y11y12	151858	1270	141784508322296	545230055481971	0.0246	Yellow	2034	14146566	14146597	146904	2519	2519.00	2.62	3	4722237
NCDO2118_RS00005	chromosomal replication initiator protein DnaA 575:1942 forward MW:51461	Regular	10521580	0	514610558	27	10	40	20.66	102602	19354	48866	0	8	Pass2	PepFrag2	None	9014738	ELEGALNR	ELEGALNR	320	8	4.26	702	0	0	0	0	466617	46910		38	1.2	b7*	176640	825	106347903600846	172695807201692	0.0086	Red	5447	9014418	9014428	197113	886	886.00	1.00	1	9014418
NCDO2118_RS00005	chromosomal replication initiator protein DnaA 575:1942 forward MW:51461	Regular	10521580	0	514610558	27	10	40	20.66	102602	19354	48866	0	9	Pass2	PepFrag2	None	16227485	NEFFNTFNALYDK	NEFFNTFNALYDK	233	13	4.07	698	0	0	0	0	1810693	52799		38	1.4	y7*	283650	1453	155096992717242	115096992717242	0.0085	Yellow	11656	16227573	16227570	325752	868	868.00	2.00	2	8118823
NCDO2118_RS00005	chromosomal replication initiator protein DnaA 575:1942 forward MW:51461	Regular	10521580	0	514610558	27	10	40	20.66	102602	19354	48866	0	10	Pass2	MissedCleavage	None	11085125	MKNDMDVQK	MKNDMDVQK	437	9	6.89	699	0	0	0	0	1685029	52487		39	1.4	y5	125358	1015	122105997475432	821059974754317	0.0125	Yellow	2563	11085187	11085204	156738	1285	1285.00	2.00	2	5547630
NCDO2118_RS00005	chromosomal replication initiator protein DnaA 575:1942 forward MW:51461	Regular	15419480	0	514610558	32	8	40	23.30	68726	54753	28399	1	1	Pass1	PepFrag1	None	13406805	IPQELNNLEDR	IPQELNNLEDR	256	11	3.83	708	14	14	10	5	504598400	78910	Identified	21488	5.3	b2b3b4b5b9y2y3y4y6y7y8y9y9*y9y10y10*y11y11*	209642	1225	13841517091563	984151709156301	0.5849	Green	6957	13406820	13406835	204014	40196	40196.00	2.00	2	6708446
NCDO2118_RS00005	chromosomal replication initiator protein DnaA 575:1942 forward MW:51461	Regular	15419480	0	514610558	32	8	40	23.30	68726	54753	28399	0	2	Pass1	PepFrag1	None	14456114	NQMENFENTYR	NQMENFENTYR	202	11	4.26	707	7	7	3	1	76718430	70730		2452	3.1	b2b3b11*y3y4*y6y6*y7y7*y8y8y10*y11	203507	1261	141113866590153	101113866590153	0.1438	Green	6241	14456119	14456129	196710	9884	9884.00	2.00	2	7233096
NCDO2118_RS00005	chromosomal replication initiator protein DnaA 575:1942 forward MW:51461	Regular	15419480	0	514610558	32	8	40	23.30	68726	54753	28399	0	3	Pass1	PepFrag1	None	10755742	GSQIVLTSDR	GSQIVLTSDR	246	10	7.00	706	5	5	3	0	53295820	69148		1642	2.3	b3b8*b9y4y5y6y7	174850	993	120335139710428	803351397104284	0.0680	Green	3515	10755696	10755720	165023	4673	4673.00	2.00	2	5382884
NCDO2118_RS00005	chromosomal replication initiator protein DnaA 575:1942 forward MW:51461	Regular	15419480	0	514610558	32	8	40	23.30	68726	54753	28399	0	4	Pass1	PepFrag1	None	16227485	NEFFNTFNALYDK	NEFFNTFNALYDK	233	13	4.07	709	0	0	0	0	1745220	54299		43	1.7	b6*	349328	1453	155096992717242	115096992717242	0.0242	Yellow	14061	16227430	16227430	325555	1664	1664.00	2.00	2	8118751
NCDO2118_RS00005	chromosomal replication initiator protein DnaA 575:1942 forward MW:51461	Regular	15419480	0	514610558	32	8	40	23.30	68726	54753	28399	0	5	Pass2	PepFrag2	None	14146921	LNNQSSIEEQPR	LNNQSSIEEQPR	93	12	4.26	713	2	2	0	0	2216544	55337	Missing	731	2.2	b4*b5y12	130596	1270	141784508322296	545230055481971	0.0482	Yellow	2190	14146436	14146459	146811	3310	3310.00	2.64	3	4722194
NCDO2118_RS00005	chromosomal replication initiator protein DnaA 575:1942 forward MW:51461	Regular	15419480	0	514610558	32	8	40	23.30	68726	54753	28399	0	6	Pass2	PepFrag2	None	22391241	LEFPSETLSYIAGQIDSNVR	LEFPSETLSYIAGQIDSNVR	300	20	3.83	712	1	1	0	0	1956629	54796	Missing	35	1.9	b10	330288	2061	195799522665613	155799522665613	0.0203	Yellow	13548	22390428	22390371	307409	1395	1395.00	2.41	2	11200251
NCDO2118_RS00005	chromosomal replication initiator protein DnaA 575:1942 forward MW:51461	Regular	15419480	0	514610558	32	8	40	23.30	68726	54753	28399	0	7	Pass2	VarMod	Phosphoryl STY(11)	17027148	NEFFNTFNALYDK	NEFFNTFNALYDK	233	13	4.07	711	1	1	0	0	3085972	56775		364	2.5	b8y5y6y8y10	349328	1453	155096992717242	115096992717242	0.0613	Yellow	8509	17027170	17027164	222387	4212	4212.00	2.00	2	8518621
NCDO2118_RS00005	chromosomal replication initiator protein DnaA 575:1942 forward MW:51461	Regular	15419480	0	514610558	32	8	40	23.30	68726	54753	28399	0	8	Pass2	VarMod	Phosphoryl STY(26)	33545309	QAYDFFIEPAQLMSVEQDTANILLDSGMK	QAYDFFIEPAQLMSVEQDTANILLDSGMK	24	29	3.43	710	2	2	0	0	2304882	55507	Missing	1644	3.0	b9*b10y5y13y16-H3PO4	452493	3026	252933051347924	864665256739621	0.0494	Yellow	8449	33545230	33545230	221646	3392	3392.00	4.00	4	8393862
NCDO2118_RS00005	chromosomal replication initiator protein DnaA 575:1942 forward MW:51461	Regular	21347540	0	514610558	42	11	40	21.32	183230	50248	33093	1	1	Pass1	PepFrag1	None	13406805	IPQELNNLEDR	IPQELNNLEDR	256	11	3.83	789	15	15	11	5	754488900	82070	Identified	25357	5.4	b2b3b4b5b7b9y3y4y5y6y7y7*y8y9y9y10y11	217360	1225	13841517091563	984151709156301	0.2419	Green	9759	13406795	13406809	202779	44320	44320.00	2.00	2	6708434
NCDO2118_RS00005	chromosomal replication initiator protein DnaA 575:1942 forward MW:51461	Regular	21347540	0	514610558	42	11	40	21.32	183230	50248	33093	0	2	Pass1	PepFrag1	None	14456114	NQMENFENTYR	NQMENFENTYR	202	11	4.26	788	9	9	5	2	120545800	74105		1921	2.4	b2b3b11y1y2y4*y6y7y8y9y11	190620	1261	141113866590153	101113866590153	0.0244	Green	8591	14456064	14456074	194635	4474	4474.00	2.00	2	7233068
NCDO2118_RS00005	chromosomal replication initiator protein DnaA 575:1942 forward MW:51461	Regular	21347540	0	514610558	42	11	40	21.32	183230	50248	33093	0	3	Pass1	PepFrag1	None	18778664	YVSSENFVNDYVNATR	YVSSENFVNDYVNATR	185	16	4.07	790	1	1	0	0	1520513	55113		76	1.5	b12y11*	245399	1674	170449842120481	130449842120481	0.0050	Yellow	15059	18778520	18778511	244942	910	910.00	2.00	2	9394297
NCDO2118_RS00005	chromosomal replication initiator protein DnaA 575:1942 forward MW:51461	Regular	21347540	0	514610558	42	11	40	21.32	183230	50248	33093	0	4	Pass2	PepFrag2	None	14146921	LNNQSSIEEQPR	LNNQSSIEEQPR	93	12	4.26	794	1	1	0	0	1586559	55298	Missing	926	7.1	b7*b9*b11y6*y7y8*y10y11y12	132052	1270	141784508322296	101784508322296	0.4550	Yellow	3831	14147443	14147454	156152	83376	83376.00	1.97	2	7078758
NCDO2118_RS00005	chromosomal replication initiator protein DnaA 575:1942 forward MW:51461	Regular	21347540	0	514610558	42	11	40	21.32	183230	50248	33093	0	5	Pass2	PepFrag2	None	22951292	IQDEVANYYHISFSDLVGPK	IQDEVANYYHISFSDLVGPK	368	20	4.30	797	1	1	0	0	247097	47222	Missing	334	4.3	b7*b19*y1	308050	2104	198513535662455	923423571083036	0.0691	Red	14795	22950849	22950845	242825	12669	12669.00	2.84	3	7656998
NCDO2118_RS00005	chromosomal replication initiator protein DnaA 575:1942 forward MW:51461	Regular	21347540	0	514610558	42	11	40	21.32	183230	50248	33093	0	6	Pass2	PepFrag2	None	5793038	FWAR	FWAR	9	4	11.05	796	3	3	1	0	4979949	60266		157	0.0	b4y3y4	169330	513	774767172322126	114953434464425	0.0079	Green	4474	5793150	5793169	161963	1454	1454.00	1.00	1	5793150
NCDO2118_RS00005	chromosomal replication initiator protein DnaA 575:1942 forward MW:51461	Regular	21347540	0	514610558	42	11	40	21.32	183230	50248	33093	0	7	Pass2	PepFrag2	None	6903668	DIDSIK	DIDSIK	446	6	3.88	795	2	2	0	0	1754312	55735		547	1.1	b2y4y6	122966	638	895997408068357	139199481613671	0.0055	Yellow	4091	6903469	6903489	158540	1004	1004.00	1.00	1	6903469
NCDO2118_RS00005	chromosomal replication initiator protein DnaA 575:1942 forward MW:51461	Regular	21347540	0	514610558	42	11	40	21.32	183230	50248	33093	0	8	Pass2	PepFrag2	None	15207261	NDMDVQKDIDSIK	NDMDVQKDIDSIK	439	13	3.87	798	2	2	0	0	691837	51694		81	1.4	b10y6	195096	1394	150869511231425	60579674154283	0.0052	Yellow	2651	15206984	15207028	143094	946	946.00	3.00	3	5075710
NCDO2118_RS00005	chromosomal replication initiator protein DnaA 575:1942 forward MW:51461	Regular	21347540	0	514610558	42	11	40	21.32	183230	50248	33093	0	9	Pass2	VarMod	Oxidation M(13);Phosphoryl STY(26)	33705258	QAYDFFIEPAQLMSVEQDTANILLDSGMK	QAYDFFIEPAQLMSVEQDTANILLDSGMK	24	29	3.43	791	3	3	0	1	2704244	57614	Missing	1727	6.4	b10b22y8-H3PO4y9y19y24*	438577	3026	252933051347924	864665256739621	0.1401	Green	11837	33705382	33705382	217645	25664	25664.00	3.87	4	8433900
NCDO2118_RS00005	chromosomal replication initiator protein DnaA 575:1942 forward MW:51461	Regular	21347540	0	514610558	42	11	40	21.32	183230	50248	33093	0	10	Pass2	VarMod	Oxidation M(3)	15367210	NDMDVQKDIDSIK	NDMDVQKDIDSIK	439	13	3.87	793	2	2	0	0	3663381	58932		1168	3.0	y1y4y8	195096	1394	150869511231425	60579674154283	0.0405	Green	3926	15367157	15367200	156916	7417	7417.00	2.89	3	5129101
NCDO2118_RS00005	chromosomal replication initiator protein DnaA 575:1942 forward MW:51461	Regular	21347540	0	514610558	42	11	40	21.32	183230	50248	33093	0	11	Pass2	VarMod	Oxidation M(13);Phosphoryl STY(26)	34986208	QAYDFFIEPAQLMSVEQDTANILLDSGMKK	QAYDFFIEPAQLMSVEQDTANILLDSGMKK	24	30	3.86	792	3	3	0	0	2660488	57543	Identified	799	2.0	b8y6y6y10*y13y13	418231	3161	260400990244576	133600660163051	0.0054	Green	21116	34986335	34986163	329099	996	996.00	3.00	3	11668827
NCDO2118_RS00005	chromosomal replication initiator protein DnaA 575:1942 forward MW:51461	Regular	7629918	0	514610558	36	10	40	18.46	51500	37862	22544	1	1	Pass1	PepFrag1	None	10755742	GSQIVLTSDR	GSQIVLTSDR	246	10	7.00	1962	12	12	7	3	260375100	72981		15309	4.6	b2b2b3b3b4b6b10y2y3y4y5y6y6y7y8y8*y8y10	181652	993	120335139710428	803351397104284	0.6076	Green	3522	10755680	10755704	163932	31293	31293.00	1.92	2	5382876
NCDO2118_RS00005	chromosomal replication initiator protein DnaA 575:1942 forward MW:51461	Regular	7629918	0	514610558	36	10	40	18.46	51500	37862	22544	0	2	Pass1	PepFrag1	None	11736474	VTELAQQSIGK	VTELAQQSIGK	13	11	7.00	1961	7	7	4	2	26297560	63024		1121	2.1	b3b3b5y6y7y8y9y10	168198	1106	129299363058093	892993630580926	0.0640	Green	2730	11736401	11736423	156457	3297	3297.00	2.00	2	5873237
NCDO2118_RS00005	chromosomal replication initiator protein DnaA 575:1942 forward MW:51461	Regular	7629918	0	514610558	36	10	40	18.46	51500	37862	22544	0	3	Pass1	PepFrag1	None	23671173	MIDYELYANDELTELELHR	MIDYELYANDELTELELHR	74	19	3.82	1964	4	4	0	0	13749690	60208		1119	2.6	b7y7y7y12y14y17	367453	2166	202394451467605	949296343117369	0.0635	Green	21463	23671129	23671110	346991	3272	3272.00	3.00	3	7897091
NCDO2118_RS00005	chromosomal replication initiator protein DnaA 575:1942 forward MW:51461	Regular	7629918	0	514610558	36	10	40	18.46	51500	37862	22544	0	4	Pass1	PepFrag1	None	13406805	IPQELNNLEDR	IPQELNNLEDR	256	11	3.83	1963	3	3	1	0	26738710	63097	Identified	964	1.3	b8y3y8y10y11	203826	1225	13841517091563	984151709156301	0.0174	Green	8018	13406762	13406777	202856	896	896.00	2.00	2	6708417
NCDO2118_RS00005	chromosomal replication initiator protein DnaA 575:1942 forward MW:51461	Regular	7629918	0	514610558	36	10	40	18.46	51500	37862	22544	0	5	Pass2	PepFrag2	None	15207261	NDMDVQKDIDSIK	NDMDVQKDIDSIK	439	13	3.87	1970	1	1	0	0	836834	48052		77	1.4	b6y4	207158	1394	150869511231425	60579674154283	0.0165	Red	1884	15206770	15206810	143121	851	851.00	3.00	3	5075638
NCDO2118_RS00005	chromosomal replication initiator protein DnaA 575:1942 forward MW:51461	Regular	7629918	0	514610558	36	10	40	18.46	51500	37862	22544	0	6	Pass2	PepFrag2	None	9014738	ELEGALNR	ELEGALNR	320	8	4.26	1969	0	0	0	0	1542439	50707		38	1.1	y6*	159271	825	106347903600846	172695807201692	0.0160	Red	12256	9015041	9015053	234756	823	823.00	1.00	1	9015041
NCDO2118_RS00005	chromosomal replication initiator protein DnaA 575:1942 forward MW:51461	Regular	7629918	0	514610558	36	10	40	18.46	51500	37862	22544	0	7	Pass2	VarMod	Phosphoryl STY(9);Phosphoryl STY(10);Phosphoryl STY(17)	24790230	LEFPSETLSYIAGQIDSNVR	LEFPSETLSYIAGQIDSNVR	300	20	3.83	1966	2	2	0	0	3203907	53882	Identified	1086	2.8	b3b12b20y9-H3PO4y12-2(H3PO4)y13-H3PO4y20	325990	2061	195799522665613	905330151104089	0.0780	Yellow	17755	24790475	24790444	286420	4015	4015.00	2.79	3	8270207
NCDO2118_RS00005	chromosomal replication initiator protein DnaA 575:1942 forward MW:51461	Regular	7629918	0	514610558	36	10	40	18.46	51500	37862	22544	0	8	Pass2	VarMod	Phosphoryl STY(7);Phosphoryl STY(8)	25571694	GSQIVLTSDRIPQELNNLEDR	GSQIVLTSDRIPQELNNLEDR	246	21	4.06	1968	1	1	0	0	1206409	49640	Identified	575	2.0	b5*b11-2(H3PO4)y10y10y11*y21*	308989	2218	205620934570718	970806230471451	0.0283	Red	14503	25571556	25571516	255022	1457	1457.00	3.00	3	8530567
NCDO2118_RS00005	chromosomal replication initiator protein DnaA 575:1942 forward MW:51461	Regular	7629918	0	514610558	36	10	40	18.46	51500	37862	22544	0	9	Pass2	VarMod	Phosphoryl STY(1);Phosphoryl STY(17)	22630090	THLMHAIGNQILTDNPTAR	THLMHAIGNQILTDNPTAR	164	19	8.01	1965	3	3	0	0	1414545	50331	Missing	569	1.9	b7b7-H3PO4b12b14y1y3	252321	1952	188833703034377	148833703034377	0.0272	Red	16781	22630141	22630074	276555	1403	1403.00	2.49	2	11320107
NCDO2118_RS00005	chromosomal replication initiator protein DnaA 575:1942 forward MW:51461	Regular	7629918	0	514610558	36	10	40	18.46	51500	37862	22544	0	10	Pass2	VarMod	Oxidation M(1)	16107744	MASLNENQKFWAR	MASLNENQKFWAR	0	13	10.12	1967	2	2	0	0	2873078	53409		549	1.6	y6y10	245751	1451	154954636584765	6330309105651	0.0261	Yellow	10168	16107748	16107785	218761	1342	1342.00	3.00	3	5375964
NCDO2118_RS00005	chromosomal replication initiator protein DnaA 575:1942 forward MW:51461	Regular	7629918	0	514610558	36	10	40	18.46	51500	37862	22544	0	11	Pass2	InSource	None	5913097	LTSDR	GSQIVLTSDR	251	5	7.00	1962	1	1	0	0	1281950	0.0000		1137	0.0	y5	181652	529	790794091087325	118158818217465	0.0554	Green	3519	5913080	5913098	163910	2851	2851.00	1.00	1	5913080
NCDO2118_RS00005	chromosomal replication initiator protein DnaA 575:1942 forward MW:51461	Regular	8287942	0	514610558	26	8	40	20.66	110479	100441	12817	1	1	Pass1	PepFrag1	None	16408279	QSDLITTAGFEVFGR	QSDLITTAGFEVFGR	59	15	4.07	2005	1	1	0	0	1431499	50742		3687	7.3	b4b7y14y15y15*	328173	1507	158916308824543	118916308824543	0.6557	Red	16999	16408153	16408145	303600	72436	72436.00	2.00	2	8209113
NCDO2118_RS00005	chromosomal replication initiator protein DnaA 575:1942 forward MW:51461	Regular	8287942	0	514610558	26	8	40	20.66	110479	100441	12817	0	2	Pass1	PepFrag1	None	11736474	VTELAQQSIGK	VTELAQQSIGK	13	11	7.00	2002	14	14	10	4	318505100	74216		7151	4.5	b2b2b3b3b4b5b5b6b11y2y3y4y5*y6y6*y7y7*y8y9y9y10	178973	1106	129299363058093	892993630580926	0.2422	Green	1671	11736433	11736445	156697	26758	26758.00	2.00	2	5873253
NCDO2118_RS00005	chromosomal replication initiator protein DnaA 575:1942 forward MW:51461	Regular	8287942	0	514610558	26	8	40	20.66	110479	100441	12817	0	3	Pass1	PepFrag1	None	10755742	GSQIVLTSDR	GSQIVLTSDR	246	10	7.00	2003	3	3	2	0	7965903	58197		494	1.4	y5y6y7	188307	993	120335139710428	803351397104284	0.0113	Yellow	2110	10755639	10755654	164491	1247	1247.00	2.00	2	5382856
NCDO2118_RS00005	chromosomal replication initiator protein DnaA 575:1942 forward MW:51461	Regular	8287942	0	514610558	26	8	40	20.66	110479	100441	12817	0	4	Pass1	PepFrag1	None	23671173	MIDYELYANDELTELELHR	MIDYELYANDELTELELHR	74	19	3.82	2004	0	0	0	0	6223011	57124		390	1.7	b9*y6y7y11y12	353446	2166	202394451467605	949296343117369	0.0091	Yellow	21034	23671345	23671338	345604	1010	1010.00	3.00	3	7897164
NCDO2118_RS00005	chromosomal replication initiator protein DnaA 575:1942 forward MW:51461	Regular	8287942	0	514610558	26	8	40	20.66	110479	100441	12817	0	5	Pass2	PepFrag2	None	5793038	FWAR	FWAR	9	4	11.05	2008	1	1	0	0	6855220	57545		39	0.0	y3	147096	513	774767172322126	114953434464425	0.0227	Yellow	3627	5793147	5793159	185722	2505	2505.00	1.00	1	5793147
NCDO2118_RS00005	chromosomal replication initiator protein DnaA 575:1942 forward MW:51461	Regular	8287942	0	514610558	26	8	40	20.66	110479	100441	12817	0	6	Pass2	PepFrag2	None	18778664	YVSSENFVNDYVNATR	YVSSENFVNDYVNATR	185	16	4.07	2009	2	2	0	0	1291718	50296		216	1.5	b10y2y4*	252864	1674	170449842120481	130449842120481	0.0076	Red	11944	18777953	18777928	258866	838	838.00	2.00	2	9394013
NCDO2118_RS00005	chromosomal replication initiator protein DnaA 575:1942 forward MW:51461	Regular	8287942	0	514610558	26	8	40	20.66	110479	100441	12817	0	7	Pass2	VarMod	Phosphoryl STY(13);Phosphoryl STY(14);Phosphoryl STY(20)	40838914	QIAMYLVRELLGTSLPAIGTAFGGRDHTTVMYAYK	QIAMYLVRELLGTSLPAIGTAFGGRDHTTVMYAYK	397	35	9.39	2006	4	4	1	0	2104350	52416	Missing	501	3.4	b13b14b16b16-H3PO4b17-2(H3PO4)y9y16	373401	3618	284930326588089	102465163294045	0.0356	Yellow	16385	40839070	40839070	298241	3938	3938.00	3.78	4	10217322
NCDO2118_RS00005	chromosomal replication initiator protein DnaA 575:1942 forward MW:51461	Regular	8287942	0	514610558	26	8	40	20.66	110479	100441	12817	0	8	Pass2	VarMod	Phosphoryl STY(28)	40688936	QSDLITTAGFEVFGRMIDYELYANDELTELELHR	QSDLITTAGFEVFGRMIDYELYANDELTELELHR	59	34	3.88	2007	1	1	0	0	839744	48426		339	2.5	y9y10y14*y14-H3PO4y17	445510	3673	287810689395335	151873792930223	0.0158	Red	25204	40688917	40688636	430748	1747	1747.00	3.16	3	13569687
NCDO2118_RS00005	chromosomal replication initiator protein DnaA 575:1942 forward MW:51461	Regular	14639920	0	514610558	67	14	40	42.20	163387	116690	71803	1	1	Pass1	PepFrag1	None	16599064	ELLGTSLPAIGTAFGGR	ELLGTSLPAIGTAFGGR	405	17	7.00	3587	13	13	5	2	228201800	75239	Identified	38667	7.9	b2b2b3b5b7b7b17y3y5y7y8y10y11y12y13y14y14y15y15y17	316810	1563	162829198900762	122829198900762	0.4859	Green	32267	16599091	16599100	339864	79391	79391.00	2.00	2	8304582
NCDO2118_RS00005	chromosomal replication initiator protein DnaA 575:1942 forward MW:51461	Regular	14639920	0	514610558	67	14	40	42.20	163387	116690	71803	0	2	Pass1	PepFrag1	None	22391241	LEFPSETLSYIAGQIDSNVR	LEFPSETLSYIAGQIDSNVR	300	20	3.83	3588	12	12	3	1	15587620	63583	Missing	6600	5.1	b1b9b9b10b10b14b16b16y8y9y11y12y16y18y20	346759	2061	195799522665613	155799522665613	0.1224	Green	44113	22391223	22391195	391035	20005	20005.00	2.41	2	11200648
NCDO2118_RS00005	chromosomal replication initiator protein DnaA 575:1942 forward MW:51461	Regular	14639920	0	514610558	67	14	40	42.20	163387	116690	71803	0	3	Pass1	PepFrag1	None	16408279	QSDLITTAGFEVFGR	QSDLITTAGFEVFGR	59	15	4.07	3586	9	9	4	3	77359450	70541		4516	4.3	b2b3b4b4*b5b13y8y10y11y11y13	336485	1507	158916308824543	118916308824543	0.1058	Green	30162	16408331	16408340	331550	17294	17294.00	2.00	2	8209202
NCDO2118_RS00005	chromosomal replication initiator protein DnaA 575:1942 forward MW:51461	Regular	14639920	0	514610558	67	14	40	42.20	163387	116690	71803	0	4	Pass1	PepFrag1	None	22951292	IQDEVANYYHISFSDLVGPK	IQDEVANYYHISFSDLVGPK	368	20	4.30	3585	8	8	3	2	25159580	65662	Missing	10146	4.2	b2b4b5b10*b12b13*y4y15y18y19y19y20	320889	2104	198513535662455	923423571083036	0.0711	Green	28217	22951222	22951224	323544	11618	11618.00	2.78	3	7657122
NCDO2118_RS00005	chromosomal replication initiator protein DnaA 575:1942 forward MW:51461	Regular	14639920	0	514610558	67	14	40	42.20	163387	116690	71803	0	5	Pass1	PepFrag1	None	21030764	THLMHAIGNQILTDNPTAR	THLMHAIGNQILTDNPTAR	164	19	8.01	3583	4	4	1	0	10147060	61719	Missing	4919	3.4	b1b4b6b10b11b12*y7y8y11y13*y19*	253314	1952	188833703034377	858891353562511	0.0424	Green	8387	21030724	21030739	238988	6923	6923.00	2.93	3	7016957
NCDO2118_RS00005	chromosomal replication initiator protein DnaA 575:1942 forward MW:51461	Regular	14639920	0	514610558	67	14	40	42.20	163387	116690	71803	0	6	Pass1	PepFrag1	None	8015267	MAILLIK	MAILLIK	288	7	10.10	3584	5	5	3	2	10408160	61829		1016	2.3	b2b3y4y5y6	310572	822	106089933997782	660899339977815	0.0406	Green	18827	8015173	8015198	287091	6638	6638.00	2.00	2	4012623
NCDO2118_RS00005	chromosomal replication initiator protein DnaA 575:1942 forward MW:51461	Regular	14639920	0	514610558	67	14	40	42.20	163387	116690	71803	0	7	Pass1	PepFrag1	None	17279286	ANGIAVVDIETASQALR	ANGIAVVDIETASQALR	334	17	4.07	3592	2	2	0	0	8920834	61159		387	2.6	b11y10y10*	312622	1622	166901484985187	712676566567915	0.0243	Green	21766	17279286	17279319	297891	3978	3978.00	3.00	3	5766477
NCDO2118_RS00005	chromosomal replication initiator protein DnaA 575:1942 forward MW:51461	Regular	14639920	0	514610558	67	14	40	42.20	163387	116690	71803	0	8	Pass1	PepFrag1	None	32745646	QAYDFFIEPAQLMSVEQDTANILLDSGMK	QAYDFFIEPAQLMSVEQDTANILLDSGMK	24	29	3.43	3590	2	2	0	0	11307840	62189	Missing	521	2.7	b12b15*y6y13y14y15y16y29*	489829	3026	252933051347924	12862203423195	0.0143	Green	53875	32745541	32745442	486863	2343	2343.00	3.00	3	10921896
NCDO2118_RS00005	chromosomal replication initiator protein DnaA 575:1942 forward MW:51461	Regular	14639920	0	514610558	67	14	40	42.20	163387	116690	71803	0	9	Pass1	PepFrag1	None	18949797	NLDLLLLDDVQFFSDK	NLDLLLLDDVQFFSDK	213	16	3.43	3589	0	0	0	0	3057320	56509		35	1.5	y9*	485179	1777	1773718051956	1373718051956	0.0059	Yellow	49955	18949880	18949876	443675	970	970.00	2.00	2	9479977
NCDO2118_RS00005	chromosomal replication initiator protein DnaA 575:1942 forward MW:51461	Regular	14639920	0	514610558	67	14	40	42.20	163387	116690	71803	0	10	Pass2	PepFrag2	None	7204039	VEFVAR	VEFVAR	328	6	7.00	3591	1	1	0	0	2041382	54755		448	1.7	y5y6	143290	669	924791251551206	144958250310241	0.0196	Red	11000	7203924	7203945	252562	3201	3201.00	1.00	1	7203924
NCDO2118_RS00005	chromosomal replication initiator protein DnaA 575:1942 forward MW:51461	Regular	14639920	0	514610558	67	14	40	42.20	163387	116690	71803	0	11	Pass2	MissedCleavage	None	17689228	KQSDLITTAGFEVFGR	KQSDLITTAGFEVFGR	58	16	7.03	3593	2	2	0	0	3995117	57671		243	1.5	b10b14y9	272235	1642	168270661771182	721804411807879	0.0057	Yellow	19983	17689099	17689131	291447	935	935.00	3.00	3	5903082
NCDO2118_RS00005	chromosomal replication initiator protein DnaA 575:1942 forward MW:51461	Regular	14639920	0	514610558	67	14	40	42.20	163387	116690	71803	0	12	Pass2	VarMod	Oxidation M(1)	8175216	MAILLIK	MAILLIK	288	7	10.10	3595	4	4	1	0	4346193	58036		2451	2.1	b3b4y2y7	310572	822	106089933997782	172179867995563	0.0294	Yellow	30035	8175213	8175234	330943	4800	4800.00	1.00	1	8175213
NCDO2118_RS00005	chromosomal replication initiator protein DnaA 575:1942 forward MW:51461	Regular	14639920	0	514610558	67	14	40	42.20	163387	116690	71803	0	13	Pass2	VarMod	Phosphoryl STY(11)	16788411	STAKPASPLVSGLNEK	STAKPASPLVSGLNEK	105	16	9.88	3594	3	3	0	0	1509786	53445	Missing	1359	2.3	b9y5*y6y10	196603	1502	15856460717578	11856460717578	0.0185	Red	39404	16788277	16788284	368917	3027	3027.00	2.00	2	8399175
NCDO2118_RS00005	chromosomal replication initiator protein DnaA 575:1942 forward MW:51461	Regular	14639920	0	514610558	67	14	40	42.20	163387	116690	71803	0	14	Pass2	VarMod	Oxidation M(1)	37787865	MIDYELYANDELTELELHRLNNQSSIEEQPR	MIDYELYANDELTELELHRLNNQSSIEEQPR	74	31	3.93	3596	2	2	0	0	3670576	57303	Missing	458	2.3	b12y11y12y18	369587	3436	275292938155593	143528625437062	0.0088	Yellow	29074	37787788	37787613	327306	1442	1442.00	3.00	3	12602644
NCDO2118_RS00005	chromosomal replication initiator protein DnaA 575:1942 forward MW:51461	Regular	14639920	0	514610558	67	14	40	42.20	163387	116690	71803	0	15	Pass2	InSource	None	9465105	PAIGTAFGGR	ELLGTSLPAIGTAFGGR	412	10	11.05	3587	0	0	0	0	912318	0.0000	Missing	37	0.0	b9	316810	868	110011845688626	180023691377252	0.0050	Green	32232	9465150	9465169	339745	822	822.00	1.00	1	9465150
NCDO2118_RS00005	chromosomal replication initiator protein DnaA 575:1942 forward MW:51461	Regular	9600869	0	514610558	24	8	40	15.82	131518	42753	19328	1	1	Pass1	PepFrag1	None	13406805	IPQELNNLEDR	IPQELNNLEDR	256	11	3.83	1058	12	12	7	3	394697100	75786	Identified	13977	4.6	b2b3b4b5b9b10y4y6y8y9y9*y9y10y11	203760	1225	13841517091563	984151709156301	0.2107	Green	8114	13406840	13406853	203205	27707	27707.00	2.00	2	6708456
NCDO2118_RS00005	chromosomal replication initiator protein DnaA 575:1942 forward MW:51461	Regular	9600869	0	514610558	24	8	40	15.82	131518	42753	19328	0	2	Pass1	PepFrag1	None	14177645	NATQQSLSNLTIK	NATQQSLSNLTIK	354	13	10.10	1059	2	2	0	0	1515291	51628		270	1.3	b5b12*y4	190930	1326	145922406601142	105922406601142	0.0060	Yellow	11213	14177650	14177660	229903	795	795.00	2.47	2	7093861
NCDO2118_RS00005	chromosomal replication initiator protein DnaA 575:1942 forward MW:51461	Regular	9600869	0	514610558	24	8	40	15.82	131518	42753	19328	0	3	Pass2	PepFrag2	None	10344935	MASLNENQK	MASLNENQK	0	9	7.00	1060	0	0	0	0	498186	46797		385	6.0	y4y6	113996	938	115849685671389	758496856713894	0.5304	Red	3045	10345042	10345061	154927	69759	69759.00	2.00	2	5177557
NCDO2118_RS00005	chromosomal replication initiator protein DnaA 575:1942 forward MW:51461	Regular	9600869	0	514610558	24	8	40	15.82	131518	42753	19328	0	4	Pass2	PepFrag2	None	7324039	EIAFPR	EIAFPR	391	6	7.00	1065	1	1	0	0	424142	46098	Identified	205	1.3	b4y6	169545	673	928473850958121	145694770191624	0.0116	Red	9920	7324250	7324266	218449	1531	1531.00	1.00	1	7324250
NCDO2118_RS00005	chromosomal replication initiator protein DnaA 575:1942 forward MW:51461	Regular	9600869	0	514610558	24	8	40	15.82	131518	42753	19328	0	5	Pass2	MissedCleavage	None	17459756	SLKNATQQSLSNLTIK	SLKNATQQSLSNLTIK	351	16	10.60	1061	0	0	0	0	5317341	57080		271	3.9	b2b4*y6*	176242	1658	169362004433111	446810022165553	0.0935	Green	4485	17459764	17459764	169111	12302	12302.00	4.00	4	4372496
NCDO2118_RS00005	chromosomal replication initiator protein DnaA 575:1942 forward MW:51461	Regular	9600869	0	514610558	24	8	40	15.82	131518	42753	19328	0	6	Pass2	VarMod	Oxidation M(3)	15367210	NDMDVQKDIDSIK	NDMDVQKDIDSIK	439	13	3.87	1064	1	1	0	0	459374	46445		960	3.4	y1y5y8	194945	1394	150869511231425	60579674154283	0.0815	Red	3283	15367207	15367215	157236	10724	10724.00	2.89	3	5129118
NCDO2118_RS00005	chromosomal replication initiator protein DnaA 575:1942 forward MW:51461	Regular	9600869	0	514610558	24	8	40	15.82	131518	42753	19328	0	7	Pass2	VarMod	Oxidation M(28);Phosphoryl STY(19)	33705258	QAYDFFIEPAQLMSVEQDTANILLDSGMK	QAYDFFIEPAQLMSVEQDTANILLDSGMK	24	29	3.43	1062	4	4	0	0	3309538	55021	Missing	700	3.6	b2b6b14b23y11y13	435858	3026	252933051347924	864665256739621	0.0400	Yellow	9367	33705221	33705221	214526	5267	5267.00	4.00	4	8433860
NCDO2118_RS00005	chromosomal replication initiator protein DnaA 575:1942 forward MW:51461	Regular	9600869	0	514610558	24	8	40	15.82	131518	42753	19328	0	8	Pass2	VarMod	Phosphoryl STY(*)	19578327	YVSSENFVNDYVNATR	YVSSENFVNDYVNATR	185	16	4.07	1063	4	4	0	0	1319626	51028		2560	2.5	b8b10*y1y6y10y16	261910	1674	170449842120481	130449842120481	0.0261	Yellow	14387	19578200	19578187	269084	3433	3433.00	2.00	2	9794137
NCDO2118_RS00005	chromosomal replication initiator protein DnaA 575:1942 forward MW:51461	Regular	14405050	0	514610558	40	10	40	31.21	76747	22315	15905	1	1	Pass1	PepFrag1	None	13406805	IPQELNNLEDR	IPQELNNLEDR	256	11	3.83	600	13	13	7	3	458322800	78197	Identified	9639	4.0	b2b4b7b10y1y2y3y6y7y8y9y9y10y11	207308	1225	13841517091563	984151709156301	0.2421	Green	7275	13406766	13406777	203413	18577	18577.00	2.00	2	6708419
NCDO2118_RS00005	chromosomal replication initiator protein DnaA 575:1942 forward MW:51461	Regular	14405050	0	514610558	40	10	40	31.21	76747	22315	15905	0	2	Pass1	PepFrag1	None	14456114	NQMENFENTYR	NQMENFENTYR	202	11	4.26	599	7	7	4	2	129150200	72696		1025	2.0	b2b3y6y7y8y9y11	195856	1261	141113866590153	101113866590153	0.0363	Green	6584	14456097	14456104	196293	2783	2783.00	2.00	2	7233085
NCDO2118_RS00005	chromosomal replication initiator protein DnaA 575:1942 forward MW:51461	Regular	14405050	0	514610558	40	10	40	31.21	76747	22315	15905	0	3	Pass1	PepFrag1	None	14146921	LNNQSSIEEQPR	LNNQSSIEEQPR	93	12	4.26	598	1	1	0	0	2780997	56027	Missing	187	1.4	b5*b6y4*y5	118463	1270	141784508322296	101784508322296	0.0124	Green	2259	14146889	14146898	146191	955	955.00	2.39	2	7078481
NCDO2118_RS00005	chromosomal replication initiator protein DnaA 575:1942 forward MW:51461	Regular	14405050	0	514610558	40	10	40	31.21	76747	22315	15905	0	4	Pass2	PepFrag2	None	7204039	VEFVAR	VEFVAR	328	6	7.00	607	2	2	0	0	640731	49652		206	1.1	b5y6	176336	669	924791251551206	144958250310241	0.0136	Yellow	2426	7203908	7203920	149393	1047	1047.00	1.00	1	7203908
NCDO2118_RS00005	chromosomal replication initiator protein DnaA 575:1942 forward MW:51461	Regular	14405050	0	514610558	40	10	40	31.21	76747	22315	15905	0	5	Pass2	PepFrag2	None	18778664	YVSSENFVNDYVNATR	YVSSENFVNDYVNATR	185	16	4.07	601	0	0	0	0	3429745	56938		65	1.5	b15*	277013	1674	170449842120481	130449842120481	0.0124	Green	13083	18778675	18778662	281357	953	953.00	2.00	2	9394374
NCDO2118_RS00005	chromosomal replication initiator protein DnaA 575:1942 forward MW:51461	Regular	14405050	0	514610558	40	10	40	31.21	76747	22315	15905	0	6	Pass2	MissedCleavage	None	17998633	DHTTVMYAYKQISDK	DHTTVMYAYKQISDK	422	15	7.67	602	3	3	0	1	5494990	58985		1327	4.8	b6b11y4y4y7*y14*y15*	204176	1645	168475557585787	128475557585787	0.2937	Green	8301	17998582	17998574	215460	22544	22544.00	2.12	2	9004328
NCDO2118_RS00005	chromosomal replication initiator protein DnaA 575:1942 forward MW:51461	Regular	14405050	0	514610558	40	10	40	31.21	76747	22315	15905	0	7	Pass2	VarMod	Oxidation M(28);Phosphoryl STY(14)	33705258	QAYDFFIEPAQLMSVEQDTANILLDSGMK	QAYDFFIEPAQLMSVEQDTANILLDSGMK	24	29	3.43	603	5	5	0	0	7185330	60150	Identified	2317	5.1	b3b5b5b8*b9*b13b14*b15-H3PO4b23y14y19y22y29	475375	3026	252933051347924	864665256739621	0.1847	Green	8734	33705292	33705292	219544	14177	14177.00	3.90	4	8433878
NCDO2118_RS00005	chromosomal replication initiator protein DnaA 575:1942 forward MW:51461	Regular	14405050	0	514610558	40	10	40	31.21	76747	22315	15905	0	8	Pass2	VarMod	Phosphoryl STY(3)	16747458	MASLNENQKFWAR	MASLNENQKFWAR	0	13	10.12	606	3	3	0	0	11430640	62166		540	3.0	b9*b13y9y10*y12	291797	1451	154954636584765	114954636584765	0.0995	Green	7870	16747380	16747378	210456	7634	7634.00	2.00	2	8378726
NCDO2118_RS00005	chromosomal replication initiator protein DnaA 575:1942 forward MW:51461	Regular	14405050	0	514610558	40	10	40	31.21	76747	22315	15905	0	9	Pass2	VarMod	Phosphoryl STY(11)	17027148	NEFFNTFNALYDK	NEFFNTFNALYDK	233	13	4.07	605	3	3	0	0	3339405	56822		435	2.8	b8b13y5y10*y13	364904	1453	155096992717242	115096992717242	0.0769	Green	9028	17027156	17027153	222660	5902	5902.00	2.00	2	8518615
NCDO2118_RS00005	chromosomal replication initiator protein DnaA 575:1942 forward MW:51461	Regular	14405050	0	514610558	40	10	40	31.21	76747	22315	15905	0	10	Pass2	VarMod	Phosphoryl STY(*)	16788411	STAKPASPLVSGLNEK	STAKPASPLVSGLNEK	105	16	9.88	604	3	3	0	0	1476739	53278	Identified	164	2.1	b6b14y9	197178	1502	15856460717578	11856460717578	0.0283	Yellow	9117	16788480	16788477	223319	2175	2175.00	2.00	2	8399276
NCDO2118_RS00005	chromosomal replication initiator protein DnaA 575:1942 forward MW:51461	Regular	5326957	0.22	514610558	41	12	40	19.34	264330	243333	52154	1	1	Pass1	PepFrag1	None	23101864	NLDLLLLDDVQFFSDKEGTK	NLDLLLLDDVQFFSDKEGTK	213	20	3.77	4054	6	6	2	2	5926317	54993		33789	11.5	b8b13b14b18*y6y6y7y7y11*y20	445338	2162	202145197177627	947634647850844	0.7092	Yellow	26226	23101884	23101874	359383	187451	187451.00	2.59	3	7707343
NCDO2118_RS00005	chromosomal replication initiator protein DnaA 575:1942 forward MW:51461	Regular	5326957	0.22	514610558	41	12	40	19.34	264330	243333	52154	0	2	Pass1	PepFrag1	None	16599064	ELLGTSLPAIGTAFGGR	ELLGTSLPAIGTAFGGR	405	17	7.00	4052	10	10	4	1	94651700	67026	Identified	10478	6.2	b2b3b3b5b5b6y3y4y7y8y8y10y11y15	319162	1563	162829198900762	122829198900762	0.1568	Green	22966	16599118	16599122	342326	41449	41449.00	2.01	2	8304595
NCDO2118_RS00005	chromosomal replication initiator protein DnaA 575:1942 forward MW:51461	Regular	5326957	0.22	514610558	41	12	40	19.34	264330	243333	52154	0	3	Pass1	PepFrag1	None	9935550	QIAMYLVR	QIAMYLVR	397	8	9.84	4055	4	4	1	1	21183860	60525		738	3.2	b2b3b6*y2y6	254601	947	116589548425828	765895484258282	0.0546	Green	13608	9935507	9935533	292589	14433	14433.00	1.73	2	4972790
NCDO2118_RS00005	chromosomal replication initiator protein DnaA 575:1942 forward MW:51461	Regular	5326957	0.22	514610558	41	12	40	19.34	264330	243333	52154	0	4	Pass1	PepFrag1	None	22951292	IQDEVANYYHISFSDLVGPK	IQDEVANYYHISFSDLVGPK	368	20	4.30	4051	7	7	2	1	18862180	60021	Missing	4736	3.5	b11b15*b17y6y9y15y17*y18y19y20	324770	2104	198513535662455	923423571083036	0.0270	Green	20177	22951226	22951217	327752	7124	7124.00	2.75	3	7657124
NCDO2118_RS00005	chromosomal replication initiator protein DnaA 575:1942 forward MW:51461	Regular	5326957	0.22	514610558	41	12	40	19.34	264330	243333	52154	0	5	Pass1	PepFrag1	None	8015267	MAILLIK	MAILLIK	288	7	10.10	4050	3	3	1	0	7107761	55782		285	1.6	y3y5y6	312245	822	106089933997782	660899339977815	0.0098	Yellow	13302	8015182	8015208	290751	2595	2595.00	2.00	2	4012627
NCDO2118_RS00005	chromosomal replication initiator protein DnaA 575:1942 forward MW:51461	Regular	5326957	0.22	514610558	41	12	40	19.34	264330	243333	52154	0	6	Pass1	PepFrag1	None	18949797	NLDLLLLDDVQFFSDK	NLDLLLLDDVQFFSDK	213	16	3.43	4053	2	2	0	0	5180120	54408		733	1.8	b5b9*y9y14y15	502723	1777	1773718051956	1373718051956	0.0057	Yellow	36060	18949825	18949814	445184	1506	1506.00	2.00	2	9479949
NCDO2118_RS00005	chromosomal replication initiator protein DnaA 575:1942 forward MW:51461	Regular	5326957	0.22	514610558	41	12	40	19.34	264330	243333	52154	0	7	Pass2	PepFrag2	None	7393774	KDYWK	KDYWK	53	5	9.63	4061	2	2	0	0	3361843	52531		297	1.1	b4y5	200572	665	921101305263869	144220261052774	0.0046	Red	12770	7393869	7393887	287482	1224	1224.00	1.00	1	7393869
NCDO2118_RS00005	chromosomal replication initiator protein DnaA 575:1942 forward MW:51461	Regular	5326957	0.22	514610558	41	12	40	19.34	264330	243333	52154	0	8	Pass2	MissedCleavage	None	24282143	LVSRFSWGLTTDITAPDYETR	LVSRFSWGLTTDITAPDYETR	267	21	4.31	4057	2	2	0	0	4242660	53541	Missing	173	2.3	y2y3y5	329288	2226	206115067482983	974100449886553	0.0081	Red	20173	24282274	24282255	327720	2145	2145.00	3.00	3	8100807
NCDO2118_RS00005	chromosomal replication initiator protein DnaA 575:1942 forward MW:51461	Regular	5326957	0.22	514610558	41	12	40	19.34	264330	243333	52154	0	9	Pass2	MissedCleavage	None	17959661	IPQELNNLEDRLVSR	IPQELNNLEDRLVSR	256	15	4.44	4056	1	1	0	0	1365829	48619	Missing	39	1.8	y3	266165	1675	170517716623193	452588583115963	0.0057	Red	5989	17959404	17959435	233875	1519	1519.00	4.00	4	4497406
NCDO2118_RS00005	chromosomal replication initiator protein DnaA 575:1942 forward MW:51461	Regular	5326957	0.22	514610558	41	12	40	19.34	264330	243333	52154	0	10	Pass2	VarMod	Phosphoryl STY(9)	18259419	SLKNATQQSLSNLTIK	SLKNATQQSLSNLTIK	351	16	10.60	4059	1	1	0	0	870162	46661		368	2.1	b10*y8y10y10-H3PO4	230385	1658	169362004433111	129362004433111	0.0085	Red	8131	18259346	18259340	255229	2237	2237.00	2.00	2	9134709
NCDO2118_RS00005	chromosomal replication initiator protein DnaA 575:1942 forward MW:51461	Regular	5326957	0.22	514610558	41	12	40	19.34	264330	243333	52154	0	11	Pass2	VarMod	Oxidation M(1)	37787865	MIDYELYANDELTELELHRLNNQSSIEEQPR	MIDYELYANDELTELELHRLNNQSSIEEQPR	74	31	3.93	4058	1	1	0	0	1179128	47980	Missing	340	2.5	b6b10b22y6y8*y26	384647	3436	275292938155593	143528625437062	0.0069	Red	39297	37788075	37787898	493392	1815	1815.00	3.18	3	12602740
NCDO2118_RS00005	chromosomal replication initiator protein DnaA 575:1942 forward MW:51461	Regular	5326957	0.22	514610558	41	12	40	19.34	264330	243333	52154	0	12	Pass2	VarMod	Phosphoryl STY(14)	18259419	SLKNATQQSLSNLTIK	SLKNATQQSLSNLTIK	351	16	10.60	4060	2	2	0	0	4796505	54074		178	1.5	b8b13y6-H3PO4	230385	1658	169362004433111	129362004433111	0.0031	Yellow	6401	18259408	18259401	238169	832	832.00	2.00	2	9134740
NCDO2118_RS00005	chromosomal replication initiator protein DnaA 575:1942 forward MW:51461	Regular	7247810	0.26	514610558	44	10	40	29.89	48047	35654	12415	1	1	Pass1	PepFrag1	None	16599064	ELLGTSLPAIGTAFGGR	ELLGTSLPAIGTAFGGR	405	17	7.00	3386	12	12	3	2	135090100	69908	Identified	8802	5.5	b3b4b5b5b9b12b13b16y3y6y7y9y10y12y13y14y15y15	328032	1563	162829198900762	122829198900762	0.6201	Green	21500	16599105	16599105	343071	29792	29792.00	2.06	2	8304589
NCDO2118_RS00005	chromosomal replication initiator protein DnaA 575:1942 forward MW:51461	Regular	7247810	0.26	514610558	44	10	40	29.89	48047	35654	12415	0	2	Pass1	PepFrag1	None	8015267	MAILLIK	MAILLIK	288	7	10.10	3384	6	6	3	1	30593630	63458		523	1.8	b4b5y3y5y6y7	311905	822	106089933997782	660899339977815	0.0721	Green	12280	8015177	8015200	293388	3463	3463.00	1.56	2	4012625
NCDO2118_RS00005	chromosomal replication initiator protein DnaA 575:1942 forward MW:51461	Regular	7247810	0.26	514610558	44	10	40	29.89	48047	35654	12415	0	3	Pass1	PepFrag1	None	19729287	FSWGLTTDITAPDYETR	FSWGLTTDITAPDYETR	271	17	3.70	3385	5	5	2	0	13174270	59799	Identified	611	2.2	b5b6b7b12b13y6y7y7	331217	1776	177305255413104	137305255413104	0.0499	Green	17534	19729279	19729259	321476	2399	2399.00	2.12	2	9869676
NCDO2118_RS00005	chromosomal replication initiator protein DnaA 575:1942 forward MW:51461	Regular	7247810	0.26	514610558	44	10	40	29.89	48047	35654	12415	0	4	Pass1	PepFrag1	None	18949797	NLDLLLLDDVQFFSDK	NLDLLLLDDVQFFSDK	213	16	3.43	3387	3	3	0	0	3807068	54408		366	1.9	b4b6b13*b14y12	481384	1777	1773718051956	1373718051956	0.0349	Yellow	34478	18949788	18949773	445812	1675	1675.00	2.00	2	9479930
NCDO2118_RS00005	chromosomal replication initiator protein DnaA 575:1942 forward MW:51461	Regular	7247810	0.26	514610558	44	10	40	29.89	48047	35654	12415	0	5	Pass1	PepFrag1	None	32745646	QAYDFFIEPAQLMSVEQDTANILLDSGMK	QAYDFFIEPAQLMSVEQDTANILLDSGMK	24	29	3.43	3388	2	2	0	0	10436920	58788	Missing	225	1.9	y12y12*y14*y15y15*	487370	3026	252933051347924	12862203423195	0.0207	Yellow	37098	32745575	32745494	487903	993	993.00	3.00	3	10921907
NCDO2118_RS00005	chromosomal replication initiator protein DnaA 575:1942 forward MW:51461	Regular	7247810	0.26	514610558	44	10	40	29.89	48047	35654	12415	0	6	Pass2	PepFrag2	None	30505986	WTLAAAIAVADKPGDTYNPLFIYGGAGLGK	WTLAAAIAVADKPGDTYNPLFIYGGAGLGK	134	30	6.78	3389	3	3	0	1	4029941	54655	Missing	291	3.3	b4b5b14y16	412726	2861	243652874528969	122435249685979	0.0857	Yellow	27276	30506376	30506320	375180	4120	4120.00	2.77	3	10175507
NCDO2118_RS00005	chromosomal replication initiator protein DnaA 575:1942 forward MW:51461	Regular	7247810	0.26	514610558	44	10	40	29.89	48047	35654	12415	0	7	Pass2	PepFrag2	None	22951292	IQDEVANYYHISFSDLVGPK	IQDEVANYYHISFSDLVGPK	368	20	4.30	3390	6	6	1	1	3931115	54547	Missing	760	1.7	b2b2*b4b4*b11b12y8y11	323968	2104	198513535662455	158513535662455	0.0200	Yellow	19715	22951571	22951523	333303	961	961.00	2.32	2	11480822
NCDO2118_RS00005	chromosomal replication initiator protein DnaA 575:1942 forward MW:51461	Regular	7247810	0.26	514610558	44	10	40	29.89	48047	35654	12415	0	8	Pass2	MissedCleavage	None	17069411	EIAFPRQIAMYLVR	EIAFPRQIAMYLVR	391	14	9.84	3391	2	2	0	0	823047	47756	Missing	164	1.4	b2y5	330030	1620	166764258677485	711761724516567	0.0164	Red	9556	17069392	17069428	275813	789	789.00	2.51	3	5696512
NCDO2118_RS00005	chromosomal replication initiator protein DnaA 575:1942 forward MW:51461	Regular	7247810	0.26	514610558	44	10	40	29.89	48047	35654	12415	0	9	Pass2	VarMod	Phosphoryl STY(1)	18259419	SLKNATQQSLSNLTIK	SLKNATQQSLSNLTIK	351	16	10.60	3393	2	2	0	0	1995329	51602		451	2.2	b7b12-H3PO4b13-H3PO4y8y11	224537	1658	169362004433111	129362004433111	0.0523	Red	30105	18259580	18259571	393119	2514	2514.00	2.00	2	9134827
NCDO2118_RS00005	chromosomal replication initiator protein DnaA 575:1942 forward MW:51461	Regular	7247810	0.26	514610558	44	10	40	29.89	48047	35654	12415	0	10	Pass2	VarMod	Phosphoryl STY(11)	16258258	NATQQSLSNLTIKK	NATQQSLSNLTIKK	354	14	10.60	3392	3	3	2	0	1943587	51488		222	1.7	y6y7y8	168710	1461	155665765431764	115665765431764	0.0279	Red	15075	16258302	16258305	308932	1341	1341.00	2.00	2	8134187
NCDO2118_RS00005	chromosomal replication initiator protein DnaA 575:1942 forward MW:51461	Regular	2884139	0.32	514610558	24	10	40	14.95	105915	16010	16402	1	1	Pass1	PepFrag1	None	10755742	GSQIVLTSDR	GSQIVLTSDR	246	10	7.00	1942	8	8	5	1	121771200	65456		4465	3.4	b3b3y1y3y4y5y6y7y8y8	192952	993	120335139710428	803351397104284	0.1236	Green	2633	10755694	10755720	164721	13086	13086.00	2.00	2	5382883
NCDO2118_RS00005	chromosomal replication initiator protein DnaA 575:1942 forward MW:51461	Regular	2884139	0.32	514610558	24	10	40	14.95	105915	16010	16402	0	2	Pass1	PepFrag1	None	13406805	IPQELNNLEDR	IPQELNNLEDR	256	11	3.83	1943	1	1	0	0	1035024	44750	Missing	623	1.7	b7*y1y6	215689	1225	13841517091563	984151709156301	0.0182	Red	7101	13406772	13406787	218925	1923	1923.00	2.00	2	6708423
NCDO2118_RS00005	chromosomal replication initiator protein DnaA 575:1942 forward MW:51461	Regular	2884139	0.32	514610558	24	10	40	14.95	105915	16010	16402	0	3	Pass1	PepFrag1	None	20059614	YVSSENFVNDYVNATRK	YVSSENFVNDYVNATRK	185	17	6.89	1944	1	1	0	0	1521919	46424		139	1.6	y10y13	241372	1809	179494858110877	139494858110877	0.0095	Red	13040	20059645	20059598	317098	1001	1001.00	2.00	2	10034859
NCDO2118_RS00005	chromosomal replication initiator protein DnaA 575:1942 forward MW:51461	Regular	2884139	0.32	514610558	24	10	40	14.95	105915	16010	16402	0	4	Pass2	PepFrag2	None	18778664	YVSSENFVNDYVNATR	YVSSENFVNDYVNATR	185	16	4.07	1950	0	0	0	0	1695577	46893		36	2.7	b8*	257201	1674	170449842120481	130449842120481	0.0410	Red	10339	18778458	18778427	260842	4342	4342.00	2.00	2	9394266
NCDO2118_RS00005	chromosomal replication initiator protein DnaA 575:1942 forward MW:51461	Regular	2884139	0.32	514610558	24	10	40	14.95	105915	16010	16402	0	5	Pass2	PepFrag2	None	9014738	ELEGALNR	ELEGALNR	320	8	4.26	1951	1	1	0	0	629957	42593		161	1.9	b4y5*y8y8*	152532	825	106347903600846	172695807201692	0.0326	Red	6284	9014437	9014446	210170	3454	3454.00	1.39	1	9014437
NCDO2118_RS00005	chromosomal replication initiator protein DnaA 575:1942 forward MW:51461	Regular	2884139	0.32	514610558	24	10	40	14.95	105915	16010	16402	0	6	Pass2	PepFrag2	None	16227485	NEFFNTFNALYDK	NEFFNTFNALYDK	233	13	4.07	1949	0	0	0	0	1934186	47465		95	1.6	y4y13*	333346	1453	155096992717242	115096992717242	0.0114	Red	13307	16228012	16228006	325944	1211	1211.00	2.00	2	8119042
NCDO2118_RS00005	chromosomal replication initiator protein DnaA 575:1942 forward MW:51461	Regular	2884139	0.32	514610558	24	10	40	14.95	105915	16010	16402	0	7	Pass2	MissedCleavage	None	17998633	DHTTVMYAYKQISDK	DHTTVMYAYKQISDK	422	15	7.67	1945	5	5	0	1	8718664	54005		6667	7.2	b6b11b11b15y4y10y15y15*	198507	1645	168475557585787	128475557585787	0.6630	Yellow	6803	17998697	17998673	216077	70218	70218.00	2.22	2	9004385
NCDO2118_RS00005	chromosomal replication initiator protein DnaA 575:1942 forward MW:51461	Regular	2884139	0.32	514610558	24	10	40	14.95	105915	16010	16402	0	8	Pass2	VarMod	Phosphoryl STY(*)	19578327	YVSSENFVNDYVNATR	YVSSENFVNDYVNATR	185	16	4.07	1946	2	2	0	0	4304282	50939		1434	2.9	b7y13y16	257201	1674	170449842120481	130449842120481	0.0510	Yellow	10936	19578276	19578235	269537	5404	5404.00	2.00	2	9794174
NCDO2118_RS00005	chromosomal replication initiator protein DnaA 575:1942 forward MW:51461	Regular	2884139	0.32	514610558	24	10	40	14.95	105915	16010	16402	0	9	Pass2	VarMod	Phosphoryl STY(*);Phosphoryl STY(*)	15776971	NATQQSLSNLTIK	NATQQSLSNLTIK	354	13	10.10	1947	3	3	0	0	3860941	50467		1770	2.1	b3*b5b11-2(H3PO4)y1y6y7y13	208795	1326	145922406601142	572816044007611	0.0263	Yellow	3120	15776964	15776985	171099	2789	2789.00	2.74	3	5265703
NCDO2118_RS00005	chromosomal replication initiator protein DnaA 575:1942 forward MW:51461	Regular	2884139	0.32	514610558	24	10	40	14.95	105915	16010	16402	0	10	Pass2	VarMod	Oxidation M(6)	8654448	QISDKMK	QISDKMK	432	7	9.88	1948	3	3	0	0	2968519	49326		1012	1.6	b3b6y7	84692	796	103840876680495	167681753360989	0.0235	Yellow	2234	8654408	8654418	158871	2487	2487.00	1.00	1	8654408
NCDO2118_RS00005	chromosomal replication initiator protein DnaA 575:1942 forward MW:51461	Regular	2063938	0.95	514610558	29	12	40	10.77	132864	15647	11320	1	1	Pass1	PepFrag1	None	10755742	GSQIVLTSDR	GSQIVLTSDR	246	10	7.00	1795	7	7	2	1	50244340	60158		2630	2.7	b3b3b6b10y3y5y6y7y8	195183	993	120335139710428	803351397104284	0.0551	Green	2444	10755719	10755745	164857	7327	7327.00	2.00	2	5382896
NCDO2118_RS00005	chromosomal replication initiator protein DnaA 575:1942 forward MW:51461	Regular	2063938	0.95	514610558	29	12	40	10.77	132864	15647	11320	0	2	Pass1	PepFrag1	None	22391241	LEFPSETLSYIAGQIDSNVR	LEFPSETLSYIAGQIDSNVR	300	20	3.83	1800	2	2	0	0	2866128	47720	Missing	106	3.5	b20y9	323228	2061	195799522665613	905330151104089	0.0550	Red	10112	22391321	22391302	277026	7306	7306.00	3.00	3	7470489
NCDO2118_RS00005	chromosomal replication initiator protein DnaA 575:1942 forward MW:51461	Regular	2063938	0.95	514610558	29	12	40	10.77	132864	15647	11320	0	3	Pass1	PepFrag1	None	23671173	MIDYELYANDELTELELHR	MIDYELYANDELTELELHR	74	19	3.82	1796	3	3	1	0	13696150	54513		384	1.7	y13y14y17	363051	2166	202394451467605	949296343117369	0.0076	Yellow	12386	23671155	23671122	349583	1014	1014.00	3.00	3	7897100
NCDO2118_RS00005	chromosomal replication initiator protein DnaA 575:1942 forward MW:51461	Regular	2063938	0.95	514610558	29	12	40	10.77	132864	15647	11320	0	4	Pass2	PepFrag2	None	14146921	LNNQSSIEEQPR	LNNQSSIEEQPR	93	12	4.26	1806	4	4	1	0	2508055	47140	Identified	979	7.4	b2b5b10y3*y5y7y8y9*	149872	1270	141784508322296	101784508322296	0.7075	Red	2018	14147264	14147274	157755	94000	94000.00	2.00	2	7078668
NCDO2118_RS00005	chromosomal replication initiator protein DnaA 575:1942 forward MW:51461	Regular	2063938	0.95	514610558	29	12	40	10.77	132864	15647	11320	0	5	Pass2	PepFrag2	None	20059614	YVSSENFVNDYVNATRK	YVSSENFVNDYVNATRK	185	17	6.89	1799	2	2	0	0	1963025	46076		3626	3.8	b8b9*b14y5*y9y10y12*y17	239864	1809	179494858110877	139494858110877	0.0787	Red	9789	20059880	20059834	270446	10456	10456.00	2.22	2	10034977
NCDO2118_RS00005	chromosomal replication initiator protein DnaA 575:1942 forward MW:51461	Regular	2063938	0.95	514610558	29	12	40	10.77	132864	15647	11320	0	6	Pass2	PepFrag2	None	11736474	VTELAQQSIGK	VTELAQQSIGK	13	11	7.00	1798	2	2	0	0	1627911	45263		204	1.9	b7b10y10	162847	1106	129299363058093	892993630580926	0.0175	Red	7403	11736319	11736342	231650	2324	2324.00	2.00	2	5873196
NCDO2118_RS00005	chromosomal replication initiator protein DnaA 575:1942 forward MW:51461	Regular	2063938	0.95	514610558	29	12	40	10.77	132864	15647	11320	0	7	Pass2	PepFrag2	None	17279286	ANGIAVVDIETASQALR	ANGIAVVDIETASQALR	334	17	4.07	1801	1	1	0	0	1446062	44749		115	1.9	y7*y8	274931	1622	166901484985187	712676566567915	0.0127	Red	9001	17279028	17279054	257207	1693	1693.00	3.00	3	5766391
NCDO2118_RS00005	chromosomal replication initiator protein DnaA 575:1942 forward MW:51461	Regular	2063938	0.95	514610558	29	12	40	10.77	132864	15647	11320	0	8	Pass2	PepFrag2	None	10344935	MASLNENQK	MASLNENQK	0	9	7.00	1797	1	1	0	0	1460068	44791		120	1.2	b7y7	119735	938	115849685671389	758496856713894	0.0072	Red	3698	10344892	10344920	183844	955	955.00	2.00	2	5177482
NCDO2118_RS00005	chromosomal replication initiator protein DnaA 575:1942 forward MW:51461	Regular	2063938	0.95	514610558	29	12	40	10.77	132864	15647	11320	0	9	Pass2	VarMod	Phosphoryl STY(15)	19578327	YVSSENFVNDYVNATR	YVSSENFVNDYVNATR	185	16	4.07	1802	3	3	0	0	3432467	48503		928	2.4	b11y12y16	252891	1674	170449842120481	130449842120481	0.0238	Red	9762	19578327	19578287	269774	3156	3156.00	2.00	2	9794200
NCDO2118_RS00005	chromosomal replication initiator protein DnaA 575:1942 forward MW:51461	Regular	2063938	0.95	514610558	29	12	40	10.77	132864	15647	11320	0	10	Pass2	VarMod	Phosphoryl STY(6);Phosphoryl STY(8)	15776971	NATQQSLSNLTIK	NATQQSLSNLTIK	354	13	10.10	1803	1	1	0	0	3543963	48642		1382	2.0	b5*b11y6y7y8-2(H3PO4)	201756	1326	145922406601142	572816044007611	0.0173	Red	2906	15776911	15776946	171643	2298	2298.00	2.66	3	5265686
NCDO2118_RS00005	chromosomal replication initiator protein DnaA 575:1942 forward MW:51461	Regular	2063938	0.95	514610558	29	12	40	10.77	132864	15647	11320	0	11	Pass2	VarMod	Oxidation M(1)	16107744	MASLNENQKFWAR	MASLNENQKFWAR	0	13	10.12	1804	1	1	0	0	1343740	44430		66	1.6	y8y9	252724	1451	154954636584765	114954636584765	0.0103	Red	7393	16107661	16107656	231523	1370	1370.00	2.00	2	8058867
NCDO2118_RS00005	chromosomal replication initiator protein DnaA 575:1942 forward MW:51461	Regular	2063938	0.95	514610558	29	12	40	10.77	132864	15647	11320	0	12	Pass2	VarMod	Phosphoryl STY(3)	16747458	MASLNENQKFWAR	MASLNENQKFWAR	0	13	10.12	1805	2	2	0	0	2699406	47460		780	1.4	b3-H3PO4b10-H3PO4y7y9y9*y10	252724	1451	154954636584765	114954636584765	0.0073	Red	5681	16747327	16747317	210936	965	965.00	2.00	2	8378700
NCDO2118_RS00005	chromosomal replication initiator protein DnaA 575:1942 forward MW:51461	Regular	3734955	1.26	514610558	54	14	40	24.18	191686	19489	23325	1	1	Pass1	PepFrag1	None	16599064	ELLGTSLPAIGTAFGGR	ELLGTSLPAIGTAFGGR	405	17	7.00	4443	8	8	3	0	65761320	63903	Identified	2781	3.6	b3b14b16b17y3y8y10y14y15y16	327275	1563	162829198900762	122829198900762	0.0499	Green	26040	16599093	16599106	341951	9574	9574.00	2.00	2	8304583
NCDO2118_RS00005	chromosomal replication initiator protein DnaA 575:1942 forward MW:51461	Regular	3734955	1.26	514610558	54	14	40	24.18	191686	19489	23325	0	2	Pass1	PepFrag1	None	16408279	QSDLITTAGFEVFGR	QSDLITTAGFEVFGR	59	15	4.07	4442	5	5	1	1	19293820	58577		1946	3.1	b4*b5b6*b7y5y9y10y15	348871	1507	158916308824543	118916308824543	0.0362	Yellow	24393	16408302	16408316	334140	6943	6943.00	2.00	2	8209188
NCDO2118_RS00005	chromosomal replication initiator protein DnaA 575:1942 forward MW:51461	Regular	3734955	1.26	514610558	54	14	40	24.18	191686	19489	23325	0	3	Pass1	PepFrag1	None	22391241	LEFPSETLSYIAGQIDSNVR	LEFPSETLSYIAGQIDSNVR	300	20	3.83	4445	8	8	2	1	9671016	55578	Identified	2025	2.5	b7b8b9b16b17b18*y4y5y7y7*y13y14y15y15y16y17*	350190	2061	195799522665613	155799522665613	0.0155	Yellow	24086	22391258	22391238	332667	2972	2972.00	2.19	2	11200665
NCDO2118_RS00005	chromosomal replication initiator protein DnaA 575:1942 forward MW:51461	Regular	3734955	1.26	514610558	54	14	40	24.18	191686	19489	23325	0	4	Pass1	PepFrag1	None	9935550	QIAMYLVR	QIAMYLVR	397	8	9.84	4447	2	2	0	0	4259562	52017		94	1.4	b6b8	259495	947	116589548425828	193179096851656	0.0075	Red	10424	9935530	9935555	268065	1439	1439.00	1.44	1	9935530
NCDO2118_RS00005	chromosomal replication initiator protein DnaA 575:1942 forward MW:51461	Regular	3734955	1.26	514610558	54	14	40	24.18	191686	19489	23325	0	5	Pass1	PepFrag1	None	17279286	ANGIAVVDIETASQALR	ANGIAVVDIETASQALR	334	17	4.07	4446	0	0	0	0	3555550	51232		239	1.6	y7*y15*y16	316606	1622	166901484985187	126901484985187	0.0051	Red	23858	17279256	17279266	331657	980	980.00	2.00	2	8644664
NCDO2118_RS00005	chromosomal replication initiator protein DnaA 575:1942 forward MW:51461	Regular	3734955	1.26	514610558	54	14	40	24.18	191686	19489	23325	0	6	Pass2	PepFrag2	None	7393774	KDYWK	KDYWK	53	5	9.63	4444	2	2	0	0	822712	44875		240	1.3	b5y4y5	203175	665	921101305263869	144220261052774	0.0108	Red	23929	7393783	7393808	331933	2075	2075.00	1.00	1	7393783
NCDO2118_RS00005	chromosomal replication initiator protein DnaA 575:1942 forward MW:51461	Regular	3734955	1.26	514610558	54	14	40	24.18	191686	19489	23325	0	7	Pass2	MissedCleavage	None	17998633	DHTTVMYAYKQISDK	DHTTVMYAYKQISDK	422	15	7.67	4450	3	3	0	0	6300077	53716		629	2.5	b11b13b15y5y15	194810	1645	168475557585787	128475557585787	0.0201	Red	2976	17998624	17998632	207205	3851	3851.00	2.12	2	9004349
NCDO2118_RS00005	chromosomal replication initiator protein DnaA 575:1942 forward MW:51461	Regular	3734955	1.26	514610558	54	14	40	24.18	191686	19489	23325	0	8	Pass2	MissedCleavage	None	17069411	EIAFPRQIAMYLVR	EIAFPRQIAMYLVR	391	14	9.84	4449	2	2	1	0	6081206	53563	Missing	189	2.0	y5y6	345407	1620	166764258677485	711761724516567	0.0123	Red	27957	17069497	17069540	350731	2352	2352.00	3.00	3	5696547
NCDO2118_RS00005	chromosomal replication initiator protein DnaA 575:1942 forward MW:51461	Regular	3734955	1.26	514610558	54	14	40	24.18	191686	19489	23325	0	9	Pass2	MissedCleavage	None	23972368	GSQIVLTSDRIPQELNNLEDR	GSQIVLTSDRIPQELNNLEDR	246	21	4.06	4448	4	4	0	1	10304090	55853	Identified	745	1.9	b3b9b11y4y10y11*y20*	326099	2218	205620934570718	970806230471451	0.0071	Yellow	26364	23972087	23972098	343744	1357	1357.00	3.00	3	7997411
NCDO2118_RS00005	chromosomal replication initiator protein DnaA 575:1942 forward MW:51461	Regular	3734955	1.26	514610558	54	14	40	24.18	191686	19489	23325	0	10	Pass2	VarMod	Oxidation M(1)	13637613	MAILLIKSESSR	MAILLIKSESSR	288	12	10.12	4452	4	4	0	1	9089022	55308		10958	8.5	b4b8b11y6y7y8y8y12	264190	1298	143860896543512	103860896543512	0.7187	Yellow	29529	13637474	13637496	357718	137762	137762.00	1.63	2	6823773
NCDO2118_RS00005	chromosomal replication initiator protein DnaA 575:1942 forward MW:51461	Regular	3734955	1.26	514610558	54	14	40	24.18	191686	19489	23325	0	11	Pass2	VarMod	Phosphoryl STY(11)	17869074	EIAFPRQIAMYLVR	EIAFPRQIAMYLVR	391	14	9.84	4455	4	4	0	0	7415688	54424	Identified	530	4.3	b2b12b12y7y9*y10y10*y13*	345407	1620	166764258677485	126764258677485	0.0939	Red	40967	17869188	17869196	438737	17993	17993.00	2.30	2	8939631
NCDO2118_RS00005	chromosomal replication initiator protein DnaA 575:1942 forward MW:51461	Regular	3734955	1.26	514610558	54	14	40	24.18	191686	19489	23325	0	12	Pass2	VarMod	Phosphoryl STY(11);Phosphoryl STY(14)	19059082	SLKNATQQSLSNLTIK	SLKNATQQSLSNLTIK	351	16	10.60	4454	4	4	0	0	3076008	50603		1424	2.0	b2b2b6*b11b12*b13b14-2(H3PO4)b15-H3PO4y3y5y5*y7y11-H3PO4y11-2(H3PO4)y16	231635	1658	169362004433111	129362004433111	0.0100	Red	35526	19059012	19059013	387997	1912	1912.00	2.00	2	9534542
NCDO2118_RS00005	chromosomal replication initiator protein DnaA 575:1942 forward MW:51461	Regular	3734955	1.26	514610558	54	14	40	24.18	191686	19489	23325	0	13	Pass2	VarMod	Phosphoryl STY(14)	18259419	SLKNATQQSLSNLTIK	SLKNATQQSLSNLTIK	351	16	10.60	4453	0	0	0	0	2908374	50359		139	1.8	b7*b10*y12*	231635	1658	169362004433111	129362004433111	0.0077	Red	6173	18259373	18259379	238427	1468	1468.00	2.00	2	9134723
NCDO2118_RS00005	chromosomal replication initiator protein DnaA 575:1942 forward MW:51461	Regular	3734955	1.26	514610558	54	14	40	24.18	191686	19489	23325	0	14	Pass2	VarMod	Phosphoryl STY(13);Phosphoryl STY(14)	40039251	QIAMYLVRELLGTSLPAIGTAFGGRDHTTVMYAYK	QIAMYLVRELLGTSLPAIGTAFGGRDHTTVMYAYK	397	35	9.39	4451	8	8	1	0	6929938	54130	Identified	1386	2.1	b6b7b7*b11b15-2(H3PO4)b21b29b31y7y11y15y16y21y27-2(H3PO4)	425240	3618	284930326588089	149953551058726	0.0053	Red	31550	40039323	40039152	367286	1008	1008.00	3.53	3	13353156
NCDO2118_RS00005	chromosomal replication initiator protein DnaA 575:1942 forward MW:51461	Regular	2404863	2.29	514610558	10	5	40	9.23	15431	12504	3009	1	1	Pass1	PepFrag1	None	10755742	GSQIVLTSDR	GSQIVLTSDR	246	10	7.00	2095	6	6	2	2	87513910	63232		2536	3.1	b3b3b5y3y4y5y7y8	188811	993	120335139710428	803351397104284	0.6813	Green	2837	10755714	10755737	164372	10513	10513.00	2.00	2	5382894
NCDO2118_RS00005	chromosomal replication initiator protein DnaA 575:1942 forward MW:51461	Regular	2404863	2.29	514610558	10	5	40	9.23	15431	12504	3009	0	2	Pass1	PepFrag1	None	15207261	NDMDVQKDIDSIK	NDMDVQKDIDSIK	439	13	3.87	2096	2	2	0	0	3017067	48607		138	1.5	b13y7y10	209906	1394	150869511231425	110869511231425	0.0763	Red	10547	15207206	15207212	240170	1178	1178.00	2.00	2	7608639
NCDO2118_RS00005	chromosomal replication initiator protein DnaA 575:1942 forward MW:51461	Regular	2404863	2.29	514610558	10	5	40	9.23	15431	12504	3009	0	3	Pass1	PepFrag1	None	23671173	MIDYELYANDELTELELHR	MIDYELYANDELTELELHR	74	19	3.82	2097	2	2	0	0	9465889	53573		166	1.5	y10y13	347498	2166	202394451467605	949296343117369	0.0527	Yellow	16543	23671263	23671263	346080	813	813.00	3.00	3	7897136
NCDO2118_RS00005	chromosomal replication initiator protein DnaA 575:1942 forward MW:51461	Regular	2404863	2.29	514610558	10	5	40	9.23	15431	12504	3009	0	4	Pass2	MissedCleavage	None	17689228	KQSDLITTAGFEVFGR	KQSDLITTAGFEVFGR	58	16	7.03	2098	0	0	0	0	1573629	45780		31	1.5	y7	286076	1642	168270661771182	128270661771182	0.0551	Red	14808	17689015	17689006	299106	850	850.00	2.37	2	8849544
NCDO2118_RS00005	chromosomal replication initiator protein DnaA 575:1942 forward MW:51461	Regular	2404863	2.29	514610558	10	5	40	9.23	15431	12504	3009	0	5	Pass2	VarMod	Oxidation M(1)	16107744	MASLNENQKFWAR	MASLNENQKFWAR	0	13	10.12	2099	0	0	0	0	2144805	47125		138	1.9	b11y8	233567	1451	154954636584765	114954636584765	0.1346	Red	9643	16107641	16107642	231330	2077	2077.00	2.00	2	8058857
NCDO2118_RS00005	chromosomal replication initiator protein DnaA 575:1942 forward MW:51461	Regular	2986603	2.7	514610558	35	16	40	28.13	80584	59675	12503	1	1	Pass1	PepFrag1	None	16599064	ELLGTSLPAIGTAFGGR	ELLGTSLPAIGTAFGGR	405	17	7.00	5635	8	8	4	1	41539790	60936	Missing	5160	5.8	b2b3b13b14y3y7y11y12y13y14y15y15	322327	1563	162829198900762	122829198900762	0.4277	Green	27170	16599097	16599101	341563	34465	34465.00	2.00	2	8304585
NCDO2118_RS00005	chromosomal replication initiator protein DnaA 575:1942 forward MW:51461	Regular	2986603	2.7	514610558	35	16	40	28.13	80584	59675	12503	0	2	Pass1	PepFrag1	None	9935550	QIAMYLVR	QIAMYLVR	397	8	9.84	5642	2	2	0	0	1224983	45633		831	3.7	b3b5*y8	245769	947	116589548425828	765895484258282	0.2557	Red	16170	9935502	9935526	293475	20605	20605.00	1.76	2	4972788
NCDO2118_RS00005	chromosomal replication initiator protein DnaA 575:1942 forward MW:51461	Regular	2986603	2.7	514610558	35	16	40	28.13	80584	59675	12503	0	3	Pass1	PepFrag1	None	8015267	MAILLIK	MAILLIK	288	7	10.10	5634	5	5	2	1	40508080	60827		910	2.0	b3b4b5y4y7	304414	822	106089933997782	660899339977815	0.0571	Green	15680	8015246	8015269	290963	4605	4605.00	1.53	2	4012659
NCDO2118_RS00005	chromosomal replication initiator protein DnaA 575:1942 forward MW:51461	Regular	2986603	2.7	514610558	35	16	40	28.13	80584	59675	12503	0	4	Pass1	PepFrag1	None	7393774	KDYWK	KDYWK	53	5	9.63	5638	2	2	0	0	1714406	47093		534	1.7	b4y5	186363	665	921101305263869	144220261052774	0.0490	Red	14787	7393745	7393765	287252	3947	3947.00	1.00	1	7393745
NCDO2118_RS00005	chromosomal replication initiator protein DnaA 575:1942 forward MW:51461	Regular	2986603	2.7	514610558	35	16	40	28.13	80584	59675	12503	0	5	Pass1	PepFrag1	None	7324039	EIAFPR	EIAFPR	391	6	7.00	5641	2	2	0	0	1520645	46572	Missing	1419	1.4	b5y6	132411	673	928473850958121	145694770191624	0.0266	Red	8678	7323991	7324011	253640	2141	2141.00	1.00	1	7323991
NCDO2118_RS00005	chromosomal replication initiator protein DnaA 575:1942 forward MW:51461	Regular	2986603	2.7	514610558	35	16	40	28.13	80584	59675	12503	0	6	Pass1	PepFrag1	None	18949797	NLDLLLLDDVQFFSDK	NLDLLLLDDVQFFSDK	213	16	3.43	5636	2	2	0	0	2717513	49093		650	1.7	b3b8*b11y12	497195	1777	1773718051956	1373718051956	0.0157	Red	42634	18949857	18949848	443802	1267	1267.00	2.00	2	9479965
NCDO2118_RS00005	chromosomal replication initiator protein DnaA 575:1942 forward MW:51461	Regular	2986603	2.7	514610558	35	16	40	28.13	80584	59675	12503	0	7	Pass1	PepFrag1	None	32745646	QAYDFFIEPAQLMSVEQDTANILLDSGMK	QAYDFFIEPAQLMSVEQDTANILLDSGMK	24	29	3.43	5637	2	2	1	0	4945277	51694	Identified	223	2.0	b8b9y8	493912	3026	252933051347924	12862203423195	0.0130	Red	45861	32745947	32745851	486945	1051	1051.00	3.00	3	10922031
NCDO2118_RS00005	chromosomal replication initiator protein DnaA 575:1942 forward MW:51461	Regular	2986603	2.7	514610558	35	16	40	28.13	80584	59675	12503	0	8	Pass1	PepFrag1	None	22391241	LEFPSETLSYIAGQIDSNVR	LEFPSETLSYIAGQIDSNVR	300	20	3.83	5639	3	3	0	0	4692033	51465	Identified	803	1.7	b13y4*y6y10y12y17	352221	2061	195799522665613	155799522665613	0.0129	Red	33409	22391260	22391225	369474	1042	1042.00	2.20	2	11200666
NCDO2118_RS00005	chromosomal replication initiator protein DnaA 575:1942 forward MW:51461	Regular	2986603	2.7	514610558	35	16	40	28.13	80584	59675	12503	0	9	Pass1	PepFrag1	None	22951292	IQDEVANYYHISFSDLVGPK	IQDEVANYYHISFSDLVGPK	368	20	4.30	5640	0	0	0	0	3047091	49591	Missing	79	1.6	b5*b13*	331667	2104	198513535662455	923423571083036	0.0098	Red	30243	22951363	22951370	354836	793	793.00	3.00	3	7657169
NCDO2118_RS00005	chromosomal replication initiator protein DnaA 575:1942 forward MW:51461	Regular	2986603	2.7	514610558	35	16	40	28.13	80584	59675	12503	0	10	Pass2	MissedCleavage	None	23972368	GSQIVLTSDRIPQELNNLEDR	GSQIVLTSDRIPQELNNLEDR	246	21	4.06	5643	2	2	0	1	4179174	50963	Missing	263	2.0	b4y15y16y17	320924	2218	205620934570718	165620934570718	0.0193	Red	35732	23972551	23972501	381532	1559	1559.00	2.28	2	11991312
NCDO2118_RS00005	chromosomal replication initiator protein DnaA 575:1942 forward MW:51461	Regular	2986603	2.7	514610558	35	16	40	28.13	80584	59675	12503	0	11	Pass2	MissedCleavage	None	13477664	MAILLIKSESSR	MAILLIKSESSR	288	12	10.12	5645	1	1	0	0	2346664	48456		187	1.4	y5y6	245608	1298	143860896543512	103860896543512	0.0134	Red	6030	13477801	13477818	234813	1078	1078.00	2.00	2	6743937
NCDO2118_RS00005	chromosomal replication initiator protein DnaA 575:1942 forward MW:51461	Regular	2986603	2.7	514610558	35	16	40	28.13	80584	59675	12503	0	12	Pass2	MissedCleavage	None	24282143	LVSRFSWGLTTDITAPDYETR	LVSRFSWGLTTDITAPDYETR	267	21	4.31	5644	0	0	0	0	5492224	52149	Identified	272	1.6	b10b15y12	320838	2226	206115067482983	974100449886553	0.0109	Red	23358	24281836	24281832	324474	876	876.00	3.00	3	8100660
NCDO2118_RS00005	chromosomal replication initiator protein DnaA 575:1942 forward MW:51461	Regular	2986603	2.7	514610558	35	16	40	28.13	80584	59675	12503	0	13	Pass2	VarMod	Phosphoryl STY(14)	27563443	IQDEVANYYHISFSDLVGPKRPK	IQDEVANYYHISFSDLVGPKRPK	368	23	7.67	5646	2	2	0	0	2768739	49175	Missing	299	2.6	y11y21	236616	2477	221331709597505	107554473065003	0.0336	Red	42149	27563480	27563446	438666	2709	2709.00	2.58	3	9194542
NCDO2118_RS00005	chromosomal replication initiator protein DnaA 575:1942 forward MW:51461	Regular	2986603	2.7	514610558	35	16	40	28.13	80584	59675	12503	0	14	Pass2	VarMod	Phosphoryl STY(14)	18259419	SLKNATQQSLSNLTIK	SLKNATQQSLSNLTIK	351	16	10.60	5649	1	1	0	0	2237783	48250		155	2.2	b10b13y13	230441	1658	169362004433111	129362004433111	0.0320	Red	9993	18259476	18259471	262573	2577	2577.00	2.00	2	9134775
NCDO2118_RS00005	chromosomal replication initiator protein DnaA 575:1942 forward MW:51461	Regular	2986603	2.7	514610558	35	16	40	28.13	80584	59675	12503	0	15	Pass2	VarMod	Phosphoryl STY(6)	18138996	FWARVTELAQQSIGK	FWARVTELAQQSIGK	9	15	10.12	5647	0	0	0	0	2662845	49005		136	1.5	b11y13-H3PO4	255669	1619	166695624348183	126695624348183	0.0122	Red	23683	18138988	18138984	325756	987	987.00	2.00	2	9074531
NCDO2118_RS00005	chromosomal replication initiator protein DnaA 575:1942 forward MW:51461	Regular	2986603	2.7	514610558	35	16	40	28.13	80584	59675	12503	0	16	Pass2	VarMod	Phosphoryl STY(*)	21990118	IKYVSSENFVNDYVNATR	IKYVSSENFVNDYVNATR	183	18	6.89	5648	3	3	0	1	1161554	45402		582	1.6	b6b6y7y12y15	318087	1933	187606351217852	147606351217852	0.0109	Red	18890	21990275	21990243	305133	882	882.00	2.00	2	11000174
NCDO2118_RS00005	chromosomal replication initiator protein DnaA 575:1942 forward MW:51461	Regular	2704198	3.76	514610558	12	5	40	7.03	14022	10660.5	4010	1	1	Pass1	PepFrag1	None	16599064	ELLGTSLPAIGTAFGGR	ELLGTSLPAIGTAFGGR	405	17	7.00	2285	7	7	0	1	67803440	62633	Identified	2094	2.8	b5b7b7b10b16y1y5y7y7y10y14	345218	1563	162829198900762	122829198900762	0.3276	Green	18582	16599119	16599122	343258	4593	4593.00	2.00	2	8304596
NCDO2118_RS00005	chromosomal replication initiator protein DnaA 575:1942 forward MW:51461	Regular	2704198	3.76	514610558	12	5	40	7.03	14022	10660.5	4010	0	2	Pass1	PepFrag1	None	16408279	QSDLITTAGFEVFGR	QSDLITTAGFEVFGR	59	15	4.07	2284	1	1	0	0	5183438	51467		176	2.1	y10y13	337563	1507	158916308824543	118916308824543	0.1793	Red	11796	16408214	16408218	300819	2514	2514.00	2.00	2	8209143
NCDO2118_RS00005	chromosomal replication initiator protein DnaA 575:1942 forward MW:51461	Regular	2704198	3.76	514610558	12	5	40	7.03	14022	10660.5	4010	0	3	Pass2	VarMod	Phosphoryl STY(*)	18259419	SLKNATQQSLSNLTIK	SLKNATQQSLSNLTIK	351	16	10.60	2288	0	0	0	0	1941922	47203		511	2.4	b4*b10y11	243498	1658	169362004433111	129362004433111	0.2179	Red	25452	18259269	18259260	390772	3055	3055.00	2.00	2	9134671
NCDO2118_RS00005	chromosomal replication initiator protein DnaA 575:1942 forward MW:51461	Regular	2704198	3.76	514610558	12	5	40	7.03	14022	10660.5	4010	0	4	Pass2	VarMod	Phosphoryl STY(*)	28653302	SESSRLEFPSETLSYIAGQIDSNVR	SESSRLEFPSETLSYIAGQIDSNVR	295	25	4.16	2286	2	2	0	0	1539878	46195	Missing	946	2.6	y5*y8y9*y10y11y15y15	362209	2537	224891623170823	724458115854117	0.1872	Red	11203	28653195	28653195	297083	2625	2625.00	3.88	4	7170853
NCDO2118_RS00005	chromosomal replication initiator protein DnaA 575:1942 forward MW:51461	Regular	2704198	3.76	514610558	12	5	40	7.03	14022	10660.5	4010	0	5	Pass2	VarMod	Phosphoryl STY(*)	28653302	SESSRLEFPSETLSYIAGQIDSNVR	SESSRLEFPSETLSYIAGQIDSNVR	295	25	4.16	2287	2	2	1	0	3030986	49136	Missing	283	2.0	b13y5y6	362209	2537	224891623170823	724458115854117	0.0881	Red	16371	28653405	28653405	327678	1235	1235.00	4.00	4	7170906
NCDO2118_RS00010	DNA polymerase III subunit beta 2099:3241 forward MW:42264	Regular	10530160	0	422643292	30	3	25	4.74	98641	99453	48087	1	1	Pass1	PepFrag1	None	11566460	LLPLEDSELK	LLPLEDSELK	188	10	3.83	780	10	10	7	1	387723100	76110	Identified	34235	6.1	b2y1y2y4y5y6y7y8y8y9y10	267631	1103	129065442828005	890654428280055	0.6640	Green	8955	11566453	11566476	256273	65495	65495.00	1.98	2	5788263
NCDO2118_RS00010	DNA polymerase III subunit beta 2099:3241 forward MW:42264	Regular	10530160	0	422643292	30	3	25	4.74	98641	99453	48087	0	2	Pass1	PepFrag1	None	9464993	NFLPVDNK	NFLPVDNK	55	8	6.78	779	1	1	0	0	14668930	61888	Identified	112	1.1	y5	199811	872	110349564655678	703495646556783	0.0082	Green	5296	9464921	9464950	206363	807	807.00	2.00	2	4737497
NCDO2118_RS00010	DNA polymerase III subunit beta 2099:3241 forward MW:42264	Regular	10530160	0	422643292	30	3	25	4.74	98641	99453	48087	0	3	Pass2	PepFrag2	None	15748802	FISNVRPFTLQPR	FISNVRPFTLQPR	351	13	12.40	781	0	0	0	0	528989	47459	Missing	51	1.3	b5*	275251	1475	156658626443963	116658626443963	0.0078	Red	6811	15748142	15748140	224457	771	771.00	2.00	2	7879107
NCDO2118_RS00010	DNA polymerase III subunit beta 2099:3241 forward MW:42264	Regular	10530160	0	422643292	30	3	25	4.74	98641	99453	48087	0	4	Pass2	InSource	None	9304779	PLEDSELK	LLPLEDSELK	190	8	3.83	780	14	14	11	5	644787900	0.0000	Identified	12816	0.0	b2b3b4b5b5b6b6b7b8y1y2y4y5y6y6y7y8	267631	855	108910656856658	689106568566584	0.3021	Green	8954	9304790	9304820	256246	29795	29795.00	1.59	2	4657431
NCDO2118_RS00010	DNA polymerase III subunit beta 2099:3241 forward MW:42264	Regular	10530160	0	422643292	30	3	25	4.74	98641	99453	48087	0	5	Pass2	InSource	None	8334251	LEDSELK	LLPLEDSELK	191	7	3.83	780	2	2	0	0	1862196	0.0000		582	0.0	b7y7	267631	765	101127031163723	162254062327446	0.0100	Green	8957	8334187	8334200	256292	983	983.00	1.00	1	8334187
NCDO2118_RS00010	DNA polymerase III subunit beta 2099:3241 forward MW:42264	Regular	10530160	0	422643292	30	3	25	4.74	98641	99453	48087	0	6	Pass2	InSource	None	7203410	EDSELK	LLPLEDSELK	192	6	3.83	780	3	3	0	1	9449207	0.0000		291	0.0	b4y2y6	267631	641	898803980730476	139760796146095	0.0080	Green	8958	7203354	7203369	256293	790	790.00	1.00	1	7203354
NCDO2118_RS00010	DNA polymerase III subunit beta 2099:3241 forward MW:42264	Regular	5530934	0	422643292	21	5	25	18.95	44556	26136	12719	1	1	Pass1	PepFrag1	None	11566460	LLPLEDSELK	LLPLEDSELK	188	10	3.83	1309	9	9	5	1	113090500	67962	Identified	8318	3.8	b2b10b10y1y2y4y5y6y6y7y7y8	274406	1103	129065442828005	890654428280055	0.4203	Green	7058	11566459	11566478	254376	18726	18726.00	2.00	2	5788266
NCDO2118_RS00010	DNA polymerase III subunit beta 2099:3241 forward MW:42264	Regular	5530934	0	422643292	21	5	25	18.95	44556	26136	12719	0	2	Pass1	PepFrag1	None	9464993	NFLPVDNK	NFLPVDNK	55	8	6.78	1308	5	5	2	1	88895930	66917	Identified	1895	2.1	b2b3b8y2y3y5y6	208778	872	110349564655678	703495646556783	0.0999	Green	3637	9464947	9464972	205651	4449	4449.00	2.00	2	4737510
NCDO2118_RS00010	DNA polymerase III subunit beta 2099:3241 forward MW:42264	Regular	5530934	0	422643292	21	5	25	18.95	44556	26136	12719	0	3	Pass1	PepFrag1	None	12777133	LLTVMTTNGTVK	LLTVMTTNGTVK	281	12	10.10	1311	1	1	0	0	1474506	49114		38	2.1	y7	215480	1233	139017140768438	990171407684379	0.0665	Red	9774	12777113	12777127	296247	2961	2961.00	2.00	2	6393593
NCDO2118_RS00010	DNA polymerase III subunit beta 2099:3241 forward MW:42264	Regular	5530934	0	422643292	21	5	25	18.95	44556	26136	12719	0	4	Pass1	PepFrag1	None	29274844	LTVSGDSVVTTANSPEVGSVHEELTALSK	LTVSGDSVVTTANSPEVGSVHEELTALSK	293	29	4.16	1310	4	4	0	0	7323970	56075	Identified	1853	2.7	b11b14y17y21y26y29	297986	2721	235638000407032	117092000271354	0.0570	Yellow	9359	29274874	29274801	288771	2540	2540.00	3.00	3	9765007
NCDO2118_RS00010	DNA polymerase III subunit beta 2099:3241 forward MW:42264	Regular	5530934	0	422643292	21	5	25	18.95	44556	26136	12719	0	5	Pass2	PepFrag2	None	15748802	FISNVRPFTLQPR	FISNVRPFTLQPR	351	13	12.40	1312	1	1	0	0	2276447	51001	Identified	460	3.9	b7*b11*y12*y13	245255	1475	156658626443963	644390842959755	0.3261	Yellow	4492	15748569	15748598	218858	14530	14530.00	2.90	3	5256238
NCDO2118_RS00010	DNA polymerase III subunit beta 2099:3241 forward MW:42264	Regular	5530934	0	422643292	21	5	25	18.95	44556	26136	12719	0	6	Pass2	InSource	None	5723039	PVDNK	NFLPVDNK	58	5	6.78	1308	1	1	0	0	1068915	0.0000	Identified	155	0.0	y5	208778	517	778789336328781	115757867265756	0.0303	Green	3636	5723039	5723056	205629	1350	1350.00	1.00	1	5723039
NCDO2118_RS00010	DNA polymerase III subunit beta 2099:3241 forward MW:42264	Regular	29297320	0	422643292	48	11	25	55.79	78247	62961	24427	1	1	Pass1	PepFrag1	None	21220703	EGNDLAISFNPEYLIDALK	EGNDLAISFNPEYLIDALK	322	19	3.59	1495	18	18	13	6	269727100	78978	Identified	11167	5.5	b4b4b5b5b6b6b7b7*b7b8b8*b9b18y3y4y5y9y10y11y12y13y14y15y19	421602	1968	189864176634406	149864176634406	0.3308	Green	34106	21220701	21220668	441190	25888	25888.00	2.12	2	10615387
NCDO2118_RS00010	DNA polymerase III subunit beta 2099:3241 forward MW:42264	Regular	29297320	0	422643292	48	11	25	55.79	78247	62961	24427	0	2	Pass1	PepFrag1	None	22771761	LIPNEADYTLDLVFDAAQLR	LIPNEADYTLDLVFDAAQLR	254	20	3.50	1494	16	16	8	2	283989800	79201	Identified	6594	5.4	b2b7b9b10b12b16*y2y3y4y5y6y7y8y8y10y12y14y15y17y18	424148	2125	199832255582891	932215037219275	0.2971	Green	34074	22771825	22771836	440649	23248	23248.00	2.72	3	7597324
NCDO2118_RS00010	DNA polymerase III subunit beta 2099:3241 forward MW:42264	Regular	29297320	0	422643292	48	11	25	55.79	78247	62961	24427	0	3	Pass1	PepFrag1	None	8425346	VTIPALTK	VTIPALTK	25	8	10.10	1497	2	2	0	0	8054697	63729	Identified	1181	3.2	y2y5	177586	831	106862906810347	668629068103468	0.1767	Green	8922	8425329	8425352	272389	13825	13825.00	2.00	2	4217701
NCDO2118_RS00010	DNA polymerase III subunit beta 2099:3241 forward MW:42264	Regular	29297320	0	422643292	48	11	25	55.79	78247	62961	24427	0	4	Pass1	PepFrag1	None	9185295	FDVILPSK	FDVILPSK	198	8	6.78	1498	0	0	0	0	472147	51409	Missing	52	1.4	y4	235024	877	110770988111791	181541976223582	0.0187	Red	15066	9185206	9185222	308858	1460	1460.00	1.00	1	9185206
NCDO2118_RS00010	DNA polymerase III subunit beta 2099:3241 forward MW:42264	Regular	29297320	0	422643292	48	11	25	55.79	78247	62961	24427	0	5	Pass1	PepFrag1	None	21141339	IEVEENGITLIGSNGQISIK	IEVEENGITLIGSNGQISIK	35	20	3.96	1496	1	1	0	0	1054556	54899		936	1.7	b11b13*y7y20	348624	2000	191916787182955	151916787182955	0.0131	Yellow	36823	21141326	21141294	481645	1026	1026.00	2.33	2	10575699
NCDO2118_RS00010	DNA polymerase III subunit beta 2099:3241 forward MW:42264	Regular	29297320	0	422643292	48	11	25	55.79	78247	62961	24427	0	6	Pass2	PepFrag2	None	42571523	DASMLISGTGSVLLEAAFFENVVSQLPEVTLEFTEKEQK	DASMLISGTGSVLLEAAFFENVVSQLPEVTLEFTEKEQK	63	39	3.80	1504	3	3	0	0	6129859	62543	Identified	229	3.1	b9b18y13y17*	502677	3990	304140949884318	112070474942159	0.0327	Green	32219	42573052	42572913	419892	2561	2561.00	4.00	4	10650817
NCDO2118_RS00010	DNA polymerase III subunit beta 2099:3241 forward MW:42264	Regular	29297320	0	422643292	48	11	25	55.79	78247	62961	24427	0	7	Pass2	MissedCleavage	None	15228125	FSINKNAFQNALR	FSINKNAFQNALR	3	13	11.49	1499	1	1	0	0	2677199	58945		2899	2.3	b9*b11y10*y13	205454	1410	152021743589642	112021743589642	0.0458	Yellow	7781	15227989	15227996	263484	3587	3587.00	2.00	2	7619031
NCDO2118_RS00010	DNA polymerase III subunit beta 2099:3241 forward MW:42264	Regular	29297320	0	422643292	48	11	25	55.79	78247	62961	24427	0	8	Pass2	MissedCleavage	None	18039236	NEESGFVQLITPVRTN	NEESGFVQLITPVRTN	364	16	4.26	1501	3	3	0	0	5086204	61732	Identified	313	1.8	b12y5y8y11*y12	310540	1662	169634290687124	129634290687124	0.0195	Green	15479	18039077	18039069	311309	1522	1522.00	2.58	2	9024575
NCDO2118_RS00010	DNA polymerase III subunit beta 2099:3241 forward MW:42264	Regular	29297320	0	422643292	48	11	25	55.79	78247	62961	24427	0	9	Pass2	MissedCleavage	None	32945987	SINSFKNVFTNDEEEIEIFISGSQMLFR	SINSFKNVFTNDEEEIEIFISGSQMLFR	206	28	4.00	1500	2	2	0	0	4662564	61355		180	1.9	y7y9	481852	3034	253378650349112	128919100232741	0.0117	Green	35653	32945950	32945866	461644	912	912.00	3.00	3	10988698
NCDO2118_RS00010	DNA polymerase III subunit beta 2099:3241 forward MW:42264	Regular	29297320	0	422643292	48	11	25	55.79	78247	62961	24427	0	10	Pass2	VarMod	Oxidation M(5)	12937082	LLTVMTTNGTVK	LLTVMTTNGTVK	281	12	10.10	1502	0	0	0	0	2287230	58261		604	2.1	y5*y8	220796	1233	139017140768438	990171407684379	0.0397	Yellow	23345	12937046	12937063	352962	3105	3105.00	2.00	2	6473560
NCDO2118_RS00010	DNA polymerase III subunit beta 2099:3241 forward MW:42264	Regular	29297320	0	422643292	48	11	25	55.79	78247	62961	24427	0	11	Pass2	VarMod	Phosphoryl STY(*)	42661462	LLTVMTTNGTVKLTVSGDSVVTTANSPEVGSVHEELTALSK	LLTVMTTNGTVKLTVSGDSVVTTANSPEVGSVHEELTALSK	281	41	4.63	1503	2	2	0	0	1350036	55972	Missing	272	2.3	b8b24b37-H3PO4y14y18	324921	3954	302308768540489	111154384270244	0.0142	Yellow	34287	42661439	42661300	443407	1113	1113.00	4.00	4	10672914
NCDO2118_RS00010	DNA polymerase III subunit beta 2099:3241 forward MW:42264	Regular	12353300	0	422643292	23	5	25	14.74	94058	86991	57676	1	1	Pass1	PepFrag1	None	11566460	LLPLEDSELK	LLPLEDSELK	188	10	3.83	885	11	11	9	1	453511700	77484	Identified	55788	6.6	b2y1y2y3y4y5y6y6y7y7y8y8y9y10	267594	1103	129065442828005	890654428280055	0.8810	Green	10010	11566451	11566474	256097	82864	82864.00	1.97	2	5788262
NCDO2118_RS00010	DNA polymerase III subunit beta 2099:3241 forward MW:42264	Regular	12353300	0	422643292	23	5	25	14.74	94058	86991	57676	0	2	Pass1	PepFrag1	None	11325269	NETISYYSR	NETISYYSR	234	9	6.84	887	3	3	1	0	6421412	58994		166	1.8	y3y5y6	148517	998	120738746218848	807387462188479	0.0266	Green	6882	11325285	11325310	216697	2498	2498.00	2.00	2	5667679
NCDO2118_RS00010	DNA polymerase III subunit beta 2099:3241 forward MW:42264	Regular	12353300	0	422643292	23	5	25	14.74	94058	86991	57676	0	3	Pass1	PepFrag1	None	9464993	NFLPVDNK	NFLPVDNK	55	8	6.78	886	1	1	0	0	10658490	61195	Identified	180	1.5	y5	201886	872	110349564655678	703495646556783	0.0173	Green	5882	9464897	9464927	206163	1629	1629.00	2.00	2	4737485
NCDO2118_RS00010	DNA polymerase III subunit beta 2099:3241 forward MW:42264	Regular	12353300	0	422643292	23	5	25	14.74	94058	86991	57676	0	4	Pass2	PepFrag2	None	15748802	FISNVRPFTLQPR	FISNVRPFTLQPR	351	13	12.40	889	0	0	0	0	1236758	51841	Identified	77	2.1	b6b9	280472	1475	156658626443963	116658626443963	0.0286	Yellow	10921	15748264	15748262	269268	2692	2692.00	2.00	2	7879168
NCDO2118_RS00010	DNA polymerase III subunit beta 2099:3241 forward MW:42264	Regular	12353300	0	422643292	23	5	25	14.74	94058	86991	57676	0	5	Pass2	VarMod	Phosphoryl STY(15)	18838899	NEESGFVQLITPVRTN	NEESGFVQLITPVRTN	364	16	4.26	888	2	2	0	0	3302660	56106	Identified	154	1.9	b11b11y4y9-H3PO4	292252	1662	169634290687124	730895271247495	0.0176	Green	5230	18838862	18838871	197778	1656	1656.00	3.00	3	6286336
NCDO2118_RS00010	DNA polymerase III subunit beta 2099:3241 forward MW:42264	Regular	12353300	0	422643292	23	5	25	14.74	94058	86991	57676	0	6	Pass2	InSource	None	8334251	LEDSELK	LLPLEDSELK	191	7	3.83	885	3	3	0	0	6148458	0.0000		814	0.0	b5y4y7	267594	765	101127031163723	162254062327446	0.0188	Green	9996	8334265	8334275	255967	1771	1771.00	1.00	1	8334265
NCDO2118_RS00010	DNA polymerase III subunit beta 2099:3241 forward MW:42264	Regular	12353300	0	422643292	23	5	25	14.74	94058	86991	57676	0	7	Pass2	InSource	None	7203410	EDSELK	LLPLEDSELK	192	6	3.83	885	3	3	0	1	17933410	0.0000		497	0.0	b4y2y6	267594	641	898803980730476	139760796146095	0.0101	Green	9999	7203410	7203421	256000	948	948.00	1.00	1	7203410
NCDO2118_RS00010	DNA polymerase III subunit beta 2099:3241 forward MW:42264	Regular	11357410	0	422643292	24	6	25	26.32	46433	36378	15316	1	1	Pass1	PepFrag1	None	11566460	LLPLEDSELK	LLPLEDSELK	188	10	3.83	1122	6	6	2	1	169194200	72837	Identified	10442	4.3	b2y2y4y6y7y8	268630	1103	129065442828005	890654428280055	0.5497	Green	7911	11566454	11566480	254536	25526	25526.00	2.00	2	5788263
NCDO2118_RS00010	DNA polymerase III subunit beta 2099:3241 forward MW:42264	Regular	11357410	0	422643292	24	6	25	26.32	46433	36378	15316	0	2	Pass1	PepFrag1	None	9464993	NFLPVDNK	NFLPVDNK	55	8	6.78	1121	8	8	6	2	300338000	75329	Identified	2623	2.7	b2b3b3*y2y3y3*y4y4*y5y5*y6y6*y7	208439	872	110349564655678	703495646556783	0.2006	Green	4042	9464960	9464993	205727	9314	9314.00	1.95	2	4737516
NCDO2118_RS00010	DNA polymerase III subunit beta 2099:3241 forward MW:42264	Regular	11357410	0	422643292	24	6	25	26.32	46433	36378	15316	0	3	Pass1	PepFrag1	None	21220703	EGNDLAISFNPEYLIDALK	EGNDLAISFNPEYLIDALK	322	19	3.59	1124	0	0	0	0	1799623	53105	Missing	77	1.9	b11*	393417	1968	189864176634406	149864176634406	0.0331	Yellow	17633	21220708	21220649	506909	1538	1538.00	2.00	2	10615390
NCDO2118_RS00010	DNA polymerase III subunit beta 2099:3241 forward MW:42264	Regular	11357410	0	422643292	24	6	25	26.32	46433	36378	15316	0	4	Pass1	PepFrag1	None	29274844	LTVSGDSVVTTANSPEVGSVHEELTALSK	LTVSGDSVVTTANSPEVGSVHEELTALSK	293	29	4.16	1123	2	2	0	0	6447438	58647	Missing	504	2.0	b10y29	296645	2721	235638000407032	117092000271354	0.0221	Green	10593	29274877	29274803	288030	1024	1024.00	3.00	3	9765008
NCDO2118_RS00010	DNA polymerase III subunit beta 2099:3241 forward MW:42264	Regular	11357410	0	422643292	24	6	25	26.32	46433	36378	15316	0	5	Pass2	VarMod	Phosphoryl STY(*)	29534442	SEITLKGLDSEIYPHLQEISEGSSLK	SEITLKGLDSEIYPHLQEISEGSSLK	110	26	4.35	1125	2	2	0	0	3002784	55328	Identified	366	2.8	b26-H3PO4y13-H3PO4y14y26	349653	2682	233380992913225	115587328608817	0.0649	Yellow	13050	29534656	29534577	326267	3013	3013.00	3.00	3	9851600
NCDO2118_RS00010	DNA polymerase III subunit beta 2099:3241 forward MW:42264	Regular	11357410	0	422643292	24	6	25	26.32	46433	36378	15316	0	6	Pass2	VarMod	Phosphoryl STY(7)	21361239	LLPLEDSELKFDVILPSK	LLPLEDSELKFDVILPSK	188	18	4.06	1126	2	2	0	0	3392403	55858	Identified	697	2.4	b7y16	395031	1980	190635199993294	553175999966471	0.0601	Yellow	9159	21361109	21361109	270110	2792	2792.00	4.00	4	5347832
NCDO2118_RS00010	DNA polymerase III subunit beta 2099:3241 forward MW:42264	Regular	11357410	0	422643292	24	6	25	26.32	46433	36378	15316	0	7	Pass2	InSource	None	5723039	PVDNK	NFLPVDNK	58	5	6.78	1121	4	4	2	0	75016530	0.0000	Identified	607	0.0	b3y3y4y5y5*	208439	517	778789336328781	115757867265756	0.0695	Green	4039	5723029	5723043	205711	3226	3226.00	1.00	1	5723029
NCDO2118_RS00010	DNA polymerase III subunit beta 2099:3241 forward MW:42264	Regular	28865800	0	422643292	54	13	25	48.42	260162	70255	30388	1	1	Pass1	PepFrag1	None	21220703	EGNDLAISFNPEYLIDALK	EGNDLAISFNPEYLIDALK	322	19	3.59	1579	17	17	10	5	187423200	77332	Identified	18860	6.5	b4b4b5b5*b5b6b6*b6b7b7*b7b8*b9b9b14b14*y4y6y7y9y10y11y12y13y14y15y19	417397	1968	189864176634406	149864176634406	0.1598	Green	35718	21220780	21220751	440687	41561	41561.00	2.06	2	10615426
NCDO2118_RS00010	DNA polymerase III subunit beta 2099:3241 forward MW:42264	Regular	28865800	0	422643292	54	13	25	48.42	260162	70255	30388	0	2	Pass1	PepFrag1	None	22771761	LIPNEADYTLDLVFDAAQLR	LIPNEADYTLDLVFDAAQLR	254	20	3.50	1578	18	18	13	6	347578400	80014	Identified	8333	5.6	b2b8b8b9b10b10b11b12b12*b13b13b15*y2y3y4y5y6y7y8y9y10y12y12*y18y18	422700	2125	199832255582891	932215037219275	0.0996	Green	35656	22771845	22771837	439878	25905	25905.00	2.66	3	7597330
NCDO2118_RS00010	DNA polymerase III subunit beta 2099:3241 forward MW:42264	Regular	28865800	0	422643292	54	13	25	48.42	260162	70255	30388	0	3	Pass1	PepFrag1	None	11566460	LLPLEDSELK	LLPLEDSELK	188	10	3.83	1577	2	2	0	0	21457070	67920	Identified	159	1.9	b8y3y8	269537	1103	129065442828005	890654428280055	0.0099	Green	14458	11566457	11566480	297297	2572	2572.00	1.60	2	5788265
NCDO2118_RS00010	DNA polymerase III subunit beta 2099:3241 forward MW:42264	Regular	28865800	0	422643292	54	13	25	48.42	260162	70255	30388	0	4	Pass1	PepFrag1	None	26182443	NVFTNDEEEIEIFISGSQMLFR	NVFTNDEEEIEIFISGSQMLFR	212	22	3.58	1580	0	0	0	0	3078561	59487		47	1.6	b13*	519337	2398	216600316407505	176600316407505	0.0031	Green	39845	26182398	26182316	504915	809	809.00	2.00	2	13096236
NCDO2118_RS00010	DNA polymerase III subunit beta 2099:3241 forward MW:42264	Regular	28865800	0	422643292	54	13	25	48.42	260162	70255	30388	0	5	Pass2	PepFrag2	None	15888329	NEESGFVQLITPVR	NEESGFVQLITPVR	364	14	4.26	1583	3	3	0	1	1360462	55941	Missing	424	9.8	b2b10*y5y12	321932	1473	156516982104189	116516982104189	0.6626	Yellow	29317	15888166	15888174	376649	172377	172377.00	2.00	2	7949119
NCDO2118_RS00010	DNA polymerase III subunit beta 2099:3241 forward MW:42264	Regular	28865800	0	422643292	54	13	25	48.42	260162	70255	30388	0	6	Pass2	PepFrag2	None	12777133	LLTVMTTNGTVK	LLTVMTTNGTVK	281	12	10.10	1582	3	3	0	1	5751870	62202		668	2.0	b2y5y10y10*y11	224125	1233	139017140768438	990171407684379	0.0107	Green	15916	12777245	12777266	305218	2789	2789.00	2.00	2	6393659
NCDO2118_RS00010	DNA polymerase III subunit beta 2099:3241 forward MW:42264	Regular	28865800	0	422643292	54	13	25	48.42	260162	70255	30388	0	7	Pass2	PepFrag2	None	36939010	EIFTETVFAVSTQENRPIFTGVHLETLSTGELK	EIFTETVFAVSTQENRPIFTGVHLETLSTGELK	143	33	4.42	1581	0	0	0	0	2606827	58765	Identified	77	1.9	b16*	421177	3453	276200219740423	144133479826949	0.0031	Yellow	33802	36938772	36938609	418084	808	808.00	3.00	3	12319639
NCDO2118_RS00010	DNA polymerase III subunit beta 2099:3241 forward MW:42264	Regular	28865800	0	422643292	54	13	25	48.42	260162	70255	30388	0	8	Pass2	MissedCleavage	None	16588782	MSQRLLPLEDSELK	MSQRLLPLEDSELK	184	14	4.44	1584	1	1	0	0	7983646	63626	Identified	111	2.7	y8	283315	1562	162759739925828	122759739925828	0.0206	Green	21862	16588823	16588827	336552	5347	5347.00	2.00	2	8299448
NCDO2118_RS00010	DNA polymerase III subunit beta 2099:3241 forward MW:42264	Regular	28865800	0	422643292	54	13	25	48.42	260162	70255	30388	0	9	Pass2	VarMod	Phosphoryl STY(13)	15068291	QAIGSKVTIPALTK	QAIGSKVTIPALTK	19	14	10.60	1586	2	2	0	0	3824171	60429	Identified	114	1.9	y5y7y8-H3PO4	201113	1392	150725173010307	110725173010307	0.0079	Green	23354	15068197	15068209	344385	2059	2059.00	2.00	2	7539135
NCDO2118_RS00010	DNA polymerase III subunit beta 2099:3241 forward MW:42264	Regular	28865800	0	422643292	54	13	25	48.42	260162	70255	30388	0	10	Pass2	VarMod	Phosphoryl STY(5);Phosphoryl STY(6);Phosphoryl STY(12)	17567934	QVLLTSGKSEITLK	QVLLTSGKSEITLK	102	14	9.88	1588	2	2	1	0	4521729	61157		747	1.8	b6-2(H3PO4)b8b9-H3PO4y8y9y10-2(H3PO4)	253050	1474	156587812282011	116587812282011	0.0066	Green	14172	17567958	17567957	295897	1708	1708.00	2.00	2	8789016
NCDO2118_RS00010	DNA polymerase III subunit beta 2099:3241 forward MW:42264	Regular	28865800	0	422643292	54	13	25	48.42	260162	70255	30388	0	11	Pass2	VarMod	Oxidation M(5)	12937082	LLTVMTTNGTVK	LLTVMTTNGTVK	281	12	10.10	1585	3	3	0	0	3644253	60220		519	1.7	b6b8b10b10y10	224125	1233	139017140768438	990171407684379	0.0061	Green	4968	12937052	12937072	224257	1582	1582.00	2.00	2	6473563
NCDO2118_RS00010	DNA polymerase III subunit beta 2099:3241 forward MW:42264	Regular	28865800	0	422643292	54	13	25	48.42	260162	70255	30388	0	12	Pass2	VarMod	Phosphoryl STY(*)	15968608	QVLLTSGKSEITLK	QVLLTSGKSEITLK	102	14	9.88	1587	1	1	0	0	1643807	56762		193	1.7	b7*y10	253050	1474	156587812282011	116587812282011	0.0058	Yellow	35690	15968469	15968477	440447	1505	1505.00	2.00	2	7989271
NCDO2118_RS00010	DNA polymerase III subunit beta 2099:3241 forward MW:42264	Regular	28865800	0	422643292	54	13	25	48.42	260162	70255	30388	0	13	Pass2	VarMod	Oxidation M(21)	24772228	GLDSEIYPHLQEISEGSSLKMK	GLDSEIYPHLQEISEGSSLKMK	116	22	4.63	1589	2	2	0	0	1550477	56508	Missing	136	1.8	b6y7	316994	2283	209618805500007	997458703333377	0.0044	Yellow	38350	24772380	24772357	475660	1140	1140.00	3.00	3	8264175
NCDO2118_RS00010	DNA polymerase III subunit beta 2099:3241 forward MW:42264	Regular	13702930	0	422643292	26	5	25	13.95	128919	116822	83425	1	1	Pass1	PepFrag1	None	11566460	LLPLEDSELK	LLPLEDSELK	188	10	3.83	1292	12	12	7	3	510472300	78448	Identified	81254	7.4	b2b3b7b8y1y2y4y6y6y7y8y8y9y10	269607	1103	129065442828005	890654428280055	0.8805	Green	14504	11566446	11566468	255042	113508	113508.00	1.95	2	5788259
NCDO2118_RS00010	DNA polymerase III subunit beta 2099:3241 forward MW:42264	Regular	13702930	0	422643292	26	5	25	13.95	128919	116822	83425	0	2	Pass1	PepFrag1	None	11325269	NETISYYSR	NETISYYSR	234	9	6.84	1293	1	1	0	0	608886	49214		177	1.7	b2b4y4	152904	998	120738746218848	807387462188479	0.0173	Red	9830	11325251	11325274	216179	2232	2232.00	2.00	2	5667662
NCDO2118_RS00010	DNA polymerase III subunit beta 2099:3241 forward MW:42264	Regular	13702930	0	422643292	26	5	25	13.95	128919	116822	83425	0	3	Pass1	PepFrag1	None	12646168	LIEGSYPDTNR	LIEGSYPDTNR	243	11	4.07	1291	3	3	1	0	8809999	60818	Missing	340	1.4	y6y8y9	166472	1137	131704296833136	91704296833136	0.0084	Green	2882	12646153	12646172	157619	1082	1082.00	2.00	2	6328113
NCDO2118_RS00010	DNA polymerase III subunit beta 2099:3241 forward MW:42264	Regular	13702930	0	422643292	26	5	25	13.95	128919	116822	83425	0	4	Pass2	VarMod	Phosphoryl STY(2);Phosphoryl STY(7)	12436462	VTIPALTKLK	VTIPALTKLK	25	10	10.60	1295	1	1	0	0	933388	51069	Missing	479	2.6	b5b9y4y10	221212	1090	128049326774957	880493267749569	0.0501	Yellow	17407	12436463	12436482	282691	6456	6456.00	1.94	2	6223268
NCDO2118_RS00010	DNA polymerase III subunit beta 2099:3241 forward MW:42264	Regular	13702930	0	422643292	26	5	25	13.95	128919	116822	83425	0	5	Pass2	VarMod	Phosphoryl STY(2)	16027788	FSINKNAFQNALR	FSINKNAFQNALR	3	13	11.49	1294	4	4	0	0	2405008	55179		532	2.3	b6b8-H3PO4y2y4*y8y10	227833	1410	152021743589642	613478290597612	0.0281	Yellow	5712	16027697	16027735	183646	3618	3618.00	3.00	3	5349281
NCDO2118_RS00010	DNA polymerase III subunit beta 2099:3241 forward MW:42264	Regular	13702930	0	422643292	26	5	25	13.95	128919	116822	83425	0	6	Pass2	InSource	None	7203410	EDSELK	LLPLEDSELK	192	6	3.83	1292	5	5	1	0	10435910	0.0000		643	0.0	b3b4y1y4y6	269607	641	898803980730476	139760796146095	0.0157	Green	14509	7203433	7203450	255067	2023	2023.00	1.00	1	7203433
NCDO2118_RS00010	DNA polymerase III subunit beta 2099:3241 forward MW:42264	Regular	13263280	0	422643292	41	12	25	22.37	97386	67154	30837	1	1	Pass1	PepFrag1	None	9464993	NFLPVDNK	NFLPVDNK	55	8	6.78	1518	8	8	6	2	414821700	77405	Identified	11227	4.5	b2b2*b3y2y2*y3y3y4y5y5*y5y6y6*y7y8*	198874	872	110349564655678	703495646556783	0.3645	Green	5455	9464981	9464998	204926	35497	35497.00	1.93	2	4737527
NCDO2118_RS00010	DNA polymerase III subunit beta 2099:3241 forward MW:42264	Regular	13263280	0	422643292	41	12	25	22.37	97386	67154	30837	0	2	Pass1	PepFrag1	None	11566460	LLPLEDSELK	LLPLEDSELK	188	10	3.83	1519	7	7	5	1	127911800	72296	Identified	12390	4.5	b2y4y5y6y7y8y9	265552	1103	129065442828005	890654428280055	0.3038	Green	11245	11566426	11566439	253323	29585	29585.00	2.00	2	5788249
NCDO2118_RS00010	DNA polymerase III subunit beta 2099:3241 forward MW:42264	Regular	13263280	0	422643292	41	12	25	22.37	97386	67154	30837	0	3	Pass1	PepFrag1	None	12646168	LIEGSYPDTNR	LIEGSYPDTNR	243	11	4.07	1517	2	2	0	0	29089930	65864	Identified	376	1.8	y5y9	158339	1137	131704296833136	91704296833136	0.0213	Green	1736	12646176	12646186	157971	2072	2072.00	2.00	2	6328125
NCDO2118_RS00010	DNA polymerase III subunit beta 2099:3241 forward MW:42264	Regular	13263280	0	422643292	41	12	25	22.37	97386	67154	30837	0	4	Pass1	PepFrag1	None	15888329	NEESGFVQLITPVR	NEESGFVQLITPVR	364	14	4.26	1520	1	1	0	0	1533399	53083	Missing	458	1.6	b9y11*	299724	1473	156516982104189	116516982104189	0.0120	Yellow	16876	15888256	15888251	302493	1170	1170.00	2.00	2	7949165
NCDO2118_RS00010	DNA polymerase III subunit beta 2099:3241 forward MW:42264	Regular	13263280	0	422643292	41	12	25	22.37	97386	67154	30837	0	5	Pass2	PepFrag2	None	11325269	NETISYYSR	NETISYYSR	234	9	6.84	1528	2	2	0	0	2929082	55894		74	1.8	b6y5	151531	998	120738746218848	807387462188479	0.0272	Yellow	3707	11325005	11325019	186581	2652	2652.00	2.00	2	5667539
NCDO2118_RS00010	DNA polymerase III subunit beta 2099:3241 forward MW:42264	Regular	13263280	0	422643292	41	12	25	22.37	97386	67154	30837	0	6	Pass2	PepFrag2	None	22020925	GLDSEIYPHLQEISEGSSLK	GLDSEIYPHLQEISEGSSLK	116	20	4.16	1521	2	2	0	0	3726777	56940	Missing	442	2.1	y14y18	312654	2024	193449067074994	889660447166627	0.0174	Yellow	15307	22020627	22020634	288516	1699	1699.00	3.00	3	7346924
NCDO2118_RS00010	DNA polymerase III subunit beta 2099:3241 forward MW:42264	Regular	13263280	0	422643292	41	12	25	22.37	97386	67154	30837	0	7	Pass2	MissedCleavage	None	18039236	NEESGFVQLITPVRTN	NEESGFVQLITPVRTN	364	16	4.26	1522	1	1	0	0	2334063	54908	Missing	86	2.0	b7y6	294757	1662	169634290687124	730895271247495	0.0210	Yellow	18203	18039112	18039146	314572	2044	2044.00	3.00	3	6019753
NCDO2118_RS00010	DNA polymerase III subunit beta 2099:3241 forward MW:42264	Regular	13263280	0	422643292	41	12	25	22.37	97386	67154	30837	0	8	Pass2	VarMod	Phosphoryl STY(7)	12366123	LLPLEDSELK	LLPLEDSELK	188	10	3.83	1523	1	1	0	0	411778	47373	Missing	73	2.2	b8y6	265552	1103	129065442828005	890654428280055	0.0397	Red	15628	12366199	12366210	291372	3867	3867.00	2.00	2	6188136
NCDO2118_RS00010	DNA polymerase III subunit beta 2099:3241 forward MW:42264	Regular	13263280	0	422643292	41	12	25	22.37	97386	67154	30837	0	9	Pass2	VarMod	Phosphoryl STY(*)	36027414	LIEGSYPDTNRLIPNEADYTLDLVFDAAQLR	LIEGSYPDTNRLIPNEADYTLDLVFDAAQLR	243	31	3.69	1526	1	1	0	0	1110945	51683	Missing	365	3.2	b11*b30*y8y11*y20	383852	3262	265918736551367	663674946205467	0.0366	Red	20851	36027424	36027424	343338	3562	3562.00	5.00	5	7213543
NCDO2118_RS00010	DNA polymerase III subunit beta 2099:3241 forward MW:42264	Regular	13263280	0	422643292	41	12	25	22.37	97386	67154	30837	0	10	Pass2	VarMod	Phosphoryl STY(*)	26982106	NVFTNDEEEIEIFISGSQMLFR	NVFTNDEEEIEIFISGSQMLFR	212	22	3.58	1524	3	3	0	0	710172	49740		634	2.1	b5b5*b9-H3PO4b10b18-H3PO4y1y22*	445876	2398	216600316407505	683001582037525	0.0170	Red	15863	26982289	26982289	293630	1651	1651.00	4.00	4	6753127
NCDO2118_RS00010	DNA polymerase III subunit beta 2099:3241 forward MW:42264	Regular	13263280	0	422643292	41	12	25	22.37	97386	67154	30837	0	11	Pass2	VarMod	Phosphoryl STY(6)	36027414	LIEGSYPDTNRLIPNEADYTLDLVFDAAQLR	LIEGSYPDTNRLIPNEADYTLDLVFDAAQLR	243	31	3.69	1527	1	1	0	0	702273	49692	Missing	252	2.1	b12y30	383852	3262	265918736551367	663674946205467	0.0118	Red	22989	36027468	36027468	374618	1146	1146.00	4.57	5	7213552
NCDO2118_RS00010	DNA polymerase III subunit beta 2099:3241 forward MW:42264	Regular	13263280	0	422643292	41	12	25	22.37	97386	67154	30837	0	12	Pass2	VarMod	Phosphoryl STY(8)	13106715	EQKQVLLTSGK	EQKQVLLTSGK	99	11	9.88	1525	2	2	0	0	2136827	54524		206	1.4	b4b5b8	151989	1174	134546281275756	945462812757559	0.0113	Yellow	12253	13106647	13106655	261279	1103	1103.00	2.00	2	6558360
NCDO2118_RS00010	DNA polymerase III subunit beta 2099:3241 forward MW:42264	Regular	13263280	0	422643292	41	12	25	22.37	97386	67154	30837	0	13	Pass2	InSource	None	9304779	PLEDSELK	LLPLEDSELK	190	8	3.83	1519	10	10	5	3	152340600	0.0000	Identified	4254	0.0	b2b3b4b6b8y2y5y6y6y7y7y8	265552	855	108910656856658	689106568566584	0.1018	Green	11247	9304817	9304834	253326	9914	9914.00	1.52	2	4657445
NCDO2118_RS00010	DNA polymerase III subunit beta 2099:3241 forward MW:42264	Regular	13263280	0	422643292	41	12	25	22.37	97386	67154	30837	0	14	Pass2	InSource	None	3752027	NFL	NFLPVDNK	55	3	6.13	1518	0	0	0	0	102472	0.0000		0	0.0		198874	355	606147804175728	812295608351456	0.0146	Green	5449	3752005	3752015	204914	1424	1424.00	1.00	1	3752005
NCDO2118_RS00010	DNA polymerase III subunit beta 2099:3241 forward MW:42264	Regular	51208240	0	422643292	74	16	25	59.47	238239	166249	74485	1	1	Pass1	PepFrag1	None	21220703	EGNDLAISFNPEYLIDALK	EGNDLAISFNPEYLIDALK	322	19	3.59	1271	20	20	16	5	484119700	83943	Identified	33751	8.1	b3b4b4b5b5b6b6b7b7*b7b8b9*b10*b14*b15*y1y2y4y5y6y7y8y9y9y10y10y11y12y12y13y14y14y15y19y19*	422133	1968	189864176634406	149864176634406	0.3250	Green	49451	21220737	21220718	439330	77435	77435.00	2.10	2	10615405
NCDO2118_RS00010	DNA polymerase III subunit beta 2099:3241 forward MW:42264	Regular	51208240	0	422643292	74	16	25	59.47	238239	166249	74485	0	2	Pass1	PepFrag1	None	22771761	LIPNEADYTLDLVFDAAQLR	LIPNEADYTLDLVFDAAQLR	254	20	3.50	1270	20	20	10	6	479718700	83903	Identified	18177	7.5	b2b4b6b8b9b11b11*b12b13b13*y2y3y4y5y6y7y7*y8y11y14y15y16y18y20	416727	2125	199832255582891	932215037219275	0.2428	Green	49358	22771727	22771730	438323	57856	57856.00	2.69	3	7597291
NCDO2118_RS00010	DNA polymerase III subunit beta 2099:3241 forward MW:42264	Regular	51208240	0	422643292	74	16	25	59.47	238239	166249	74485	0	3	Pass1	PepFrag1	None	8455091	QVLLTSGK	QVLLTSGK	102	8	10.10	1267	5	5	1	1	30205630	71894		5928	4.3	b2b3b6b6y5y8	156173	816	105573051186756	171146102373512	0.1299	Green	4279	8455084	8455104	212469	30958	30958.00	1.48	1	8455084
NCDO2118_RS00010	DNA polymerase III subunit beta 2099:3241 forward MW:42264	Regular	51208240	0	422643292	74	16	25	59.47	238239	166249	74485	0	4	Pass1	PepFrag1	None	15888329	NEESGFVQLITPVR	NEESGFVQLITPVR	364	14	4.26	1273	1	1	0	0	1483784	58807	Missing	937	2.4	b3b12	298296	1473	156516982104189	116516982104189	0.0153	Yellow	24689	15888347	15888358	309333	3643	3643.00	2.00	2	7949210
NCDO2118_RS00010	DNA polymerase III subunit beta 2099:3241 forward MW:42264	Regular	51208240	0	422643292	74	16	25	59.47	238239	166249	74485	0	5	Pass1	PepFrag1	None	11566460	LLPLEDSELK	LLPLEDSELK	188	10	3.83	1268	0	0	0	0	1517494	58905	Missing	213	2.1	y7	272154	1103	129065442828005	890654428280055	0.0149	Yellow	20379	11566448	11566472	292800	3561	3561.00	2.00	2	5788261
NCDO2118_RS00010	DNA polymerase III subunit beta 2099:3241 forward MW:42264	Regular	51208240	0	422643292	74	16	25	59.47	238239	166249	74485	0	6	Pass1	PepFrag1	None	21141339	IEVEENGITLIGSNGQISIK	IEVEENGITLIGSNGQISIK	35	20	3.96	1269	2	2	0	0	4153787	63278		428	1.9	y8y8*y14	354147	2000	191916787182955	879445247886369	0.0061	Green	41866	21141362	21141376	379667	1455	1455.00	3.00	3	7053836
NCDO2118_RS00010	DNA polymerase III subunit beta 2099:3241 forward MW:42264	Regular	51208240	0	422643292	74	16	25	59.47	238239	166249	74485	0	7	Pass2	PepFrag2	None	8425346	VTIPALTK	VTIPALTK	25	8	10.10	1272	4	4	1	0	4479708	63606	Identified	7224	2.7	b3b8y5y7y7y8	173491	831	106862906810347	173725813620694	0.0389	Green	14236	8425416	8425436	267379	9278	9278.00	1.00	1	8425416
NCDO2118_RS00010	DNA polymerase III subunit beta 2099:3241 forward MW:42264	Regular	51208240	0	422643292	74	16	25	59.47	238239	166249	74485	0	8	Pass2	PepFrag2	None	50305368	LTVSGDSVVTTANSPEVGSVHEELTALSKEGNDLAISFNPEYLIDALK	LTVSGDSVVTTANSPEVGSVHEELTALSKEGNDLAISFNPEYLIDALK	293	48	3.88	1282	0	0	0	0	5624556	64594	Missing	174	4.9	y4y13*	364621	4689	338698382553975	18579892170265	0.0328	Green	37343	50305587	50305154	360247	7804	7804.00	3.00	3	16775244
NCDO2118_RS00010	DNA polymerase III subunit beta 2099:3241 forward MW:42264	Regular	51208240	0	422643292	74	16	25	59.47	238239	166249	74485	0	9	Pass2	MissedCleavage	None	32945987	SINSFKNVFTNDEEEIEIFISGSQMLFR	SINSFKNVFTNDEEEIEIFISGSQMLFR	206	28	4.00	1274	5	5	1	0	11055840	67529		1828	5.0	b8b10*b12b22*y7y10y10*y10y11y28	493419	3034	253378650349112	128919100232741	0.0582	Green	49423	32945898	32945796	438958	13858	13858.00	2.89	3	10988681
NCDO2118_RS00010	DNA polymerase III subunit beta 2099:3241 forward MW:42264	Regular	51208240	0	422643292	74	16	25	59.47	238239	166249	74485	0	10	Pass2	VarMod	Oxidation M(*);Phosphoryl STY(*)	13736745	LLTVMTTNGTVK	LLTVMTTNGTVK	281	12	10.10	1278	2	2	0	0	1823786	59703		1209	3.1	b6-H3PO4y2y8-H3PO4y11y12	221112	1233	139017140768438	990171407684379	0.0370	Yellow	30374	13736617	13736636	332494	8818	8818.00	1.94	2	6873345
NCDO2118_RS00010	DNA polymerase III subunit beta 2099:3241 forward MW:42264	Regular	51208240	0	422643292	74	16	25	59.47	238239	166249	74485	0	11	Pass2	VarMod	Phosphoryl STY(7)	21361239	LLPLEDSELKFDVILPSK	LLPLEDSELKFDVILPSK	188	18	4.06	1280	2	2	0	0	4282461	63410	Identified	705	3.2	b7b9y16	399211	1980	190635199993294	553175999966471	0.0274	Green	10396	21361208	21361238	249105	6537	6537.00	4.00	4	5347856
NCDO2118_RS00010	DNA polymerase III subunit beta 2099:3241 forward MW:42264	Regular	51208240	0	422643292	74	16	25	59.47	238239	166249	74485	0	12	Pass2	VarMod	Phosphoryl STY(32)	48794039	NFLPVDNKDASMLISGTGSVLLEAAFFENVVSQLPEVTLEFTEK	NFLPVDNKDASMLISGTGSVLLEAAFFENVVSQLPEVTLEFTEK	55	44	3.74	1276	8	8	1	0	9032761	66652	Identified	1750	4.4	b6b8b15b16b16b21*b23*y10y11y13y14*y16-H3PO4y20y20*y23-H3PO4y32y44	499337	4504	32973007048422	12486503524211	0.0259	Green	51986	48794599	48794448	463223	6159	6159.00	4.09	4	12206204
NCDO2118_RS00010	DNA polymerase III subunit beta 2099:3241 forward MW:42264	Regular	51208240	0	422643292	74	16	25	59.47	238239	166249	74485	0	13	Pass2	VarMod	Oxidation M(7)	15208465	ARLLTVMTTNGTVK	ARLLTVMTTNGTVK	279	14	11.49	1281	1	1	0	0	1442226	58684		320	2.5	b8y7y10*y11*	202282	1448	154740979683982	631606531226544	0.0176	Yellow	2359	15208439	15208478	192149	4187	4187.00	2.86	3	5076195
NCDO2118_RS00010	DNA polymerase III subunit beta 2099:3241 forward MW:42264	Regular	51208240	0	422643292	74	16	25	59.47	238239	166249	74485	0	14	Pass2	VarMod	Phosphoryl STY(11)	17388445	MSQRLLPLEDSELK	MSQRLLPLEDSELK	184	14	4.44	1279	0	0	0	0	3479105	62508	Identified	388	1.8	b10*y8-H3PO4y11-H3PO4	277675	1562	162759739925828	122759739925828	0.0076	Green	12793	17388535	17388539	261533	1802	1802.00	2.00	2	8699304
NCDO2118_RS00010	DNA polymerase III subunit beta 2099:3241 forward MW:42264	Regular	51208240	0	422643292	74	16	25	59.47	238239	166249	74485	0	15	Pass2	VarMod	Phosphoryl STY(2)	9225009	VTIPALTK	VTIPALTK	25	8	10.10	1275	0	0	0	0	763683	55923	Identified	142	1.3	b5b7b3-H3PO4b4-H3PO4	173491	831	106862906810347	173725813620694	0.0049	Yellow	34565	9224985	9225004	348708	1174	1174.00	1.00	1	9224985
NCDO2118_RS00010	DNA polymerase III subunit beta 2099:3241 forward MW:42264	Regular	51208240	0	422643292	74	16	25	59.47	238239	166249	74485	0	16	Pass2	VarMod	Phosphoryl STY(*);Phosphoryl STY(*)	49593702	NFLPVDNKDASMLISGTGSVLLEAAFFENVVSQLPEVTLEFTEK	NFLPVDNKDASMLISGTGSVLLEAAFFENVVSQLPEVTLEFTEK	55	44	3.74	1277	4	4	0	0	2805205	61573	Identified	1311	2.1	b3*b8*b9-H3PO4b12*b13b13b14*b18b22-2(H3PO4)y3y5	499337	4504	32973007048422	12486503524211	0.0035	Green	52230	49594052	49593892	465768	832	832.00	4.00	4	12406068
NCDO2118_RS00010	DNA polymerase III subunit beta 2099:3241 forward MW:42264	Regular	51208240	0	422643292	74	16	25	59.47	238239	166249	74485	0	17	Pass2	InSource	None	5052980	LTSGK	QVLLTSGK	105	5	10.10	1267	0	0	0	0	295053	0.0000		0	0.0		156173	473	73395099123788	106790198247576	0.0121	Green	4297	5052957	5052976	212638	2882	2882.00	1.00	1	5052957
NCDO2118_RS00010	DNA polymerase III subunit beta 2099:3241 forward MW:42264	Regular	14429750	0	422643292	15	4	25	9.47	78589	206655	40380	1	1	Pass1	PepFrag1	None	11566460	LLPLEDSELK	LLPLEDSELK	188	10	3.83	881	9	9	7	1	546311100	78967	Identified	39833	6.2	b2y2y3y4y5y6y6y7y8y8y9	258647	1103	129065442828005	890654428280055	0.8765	Green	11775	11566454	11566474	255138	68885	68885.00	2.00	2	5788263
NCDO2118_RS00010	DNA polymerase III subunit beta 2099:3241 forward MW:42264	Regular	14429750	0	422643292	15	4	25	9.47	78589	206655	40380	0	2	Pass2	PepFrag2	None	15748802	FISNVRPFTLQPR	FISNVRPFTLQPR	351	13	12.40	884	2	2	0	0	1553505	53506	Missing	103	2.9	b10y5*y8	244687	1475	156658626443963	116658626443963	0.0869	Yellow	7835	15748207	15748210	214290	6833	6833.00	2.00	2	7879140
NCDO2118_RS00010	DNA polymerase III subunit beta 2099:3241 forward MW:42264	Regular	14429750	0	422643292	15	4	25	9.47	78589	206655	40380	0	3	Pass2	VarMod	Phosphoryl STY(2)	16027788	FSINKNAFQNALR	FSINKNAFQNALR	3	13	11.49	883	1	1	0	0	1799833	54145		70	1.5	b8y4*	211306	1410	152021743589642	613478290597612	0.0129	Yellow	12510	16027694	16027737	262964	1012	1012.00	3.00	3	5349280
NCDO2118_RS00010	DNA polymerase III subunit beta 2099:3241 forward MW:42264	Regular	14429750	0	422643292	15	4	25	9.47	78589	206655	40380	0	4	Pass2	VarMod	Oxidation M(1)	9965546	MIKFSINK	MIKFSINK	0	8	10.60	882	0	0	0	0	343104	46947		64	1.2	b7*y3*	172358	946	116507457558411	765074575584113	0.0126	Red	11005	9965598	9965622	246900	992	992.00	2.00	2	4987836
NCDO2118_RS00010	DNA polymerase III subunit beta 2099:3241 forward MW:42264	Regular	14429750	0	422643292	15	4	25	9.47	78589	206655	40380	0	5	Pass2	InSource	None	7203410	EDSELK	LLPLEDSELK	192	6	3.83	881	3	3	1	0	29824830	0.0000		310	0.0	b4y5y6	258647	641	898803980730476	139760796146095	0.0110	Green	11780	7203408	7203423	255176	867	867.00	1.00	1	7203408
NCDO2118_RS00010	DNA polymerase III subunit beta 2099:3241 forward MW:42264	Regular	16831970	0	422643292	51	13	25	51.05	80779	42437	22361	1	1	Pass1	PepFrag1	None	22771761	LIPNEADYTLDLVFDAAQLR	LIPNEADYTLDLVFDAAQLR	254	20	3.50	2556	18	18	9	5	300411800	77039	Identified	9069	5.7	b2b8b9*b11b12b13b15y1y2y3y4y5y6y7y8y10*y11y12y12*y16y18y20	423680	2125	199832255582891	932215037219275	0.3501	Green	42168	22771815	22771823	438833	28278	28278.00	2.71	3	7597320
NCDO2118_RS00010	DNA polymerase III subunit beta 2099:3241 forward MW:42264	Regular	16831970	0	422643292	51	13	25	51.05	80779	42437	22361	0	2	Pass1	PepFrag1	None	8455091	QVLLTSGK	QVLLTSGK	102	8	10.10	2555	7	7	2	3	31692930	67271		2517	3.1	b2b3b6y2y5y6y8	158740	816	105573051186756	655730511867559	0.1610	Green	3422	8455101	8455125	213835	13006	13006.00	1.58	2	4232587
NCDO2118_RS00010	DNA polymerase III subunit beta 2099:3241 forward MW:42264	Regular	16831970	0	422643292	51	13	25	51.05	80779	42437	22361	0	3	Pass1	PepFrag1	None	21220703	EGNDLAISFNPEYLIDALK	EGNDLAISFNPEYLIDALK	322	19	3.59	2558	3	3	0	0	3683563	57924	Identified	401	1.8	b10b10*y3y11*y13	419340	1968	189864176634406	865761177562707	0.0143	Yellow	43122	21220695	21220713	448984	1153	1153.00	2.64	3	7080280
NCDO2118_RS00010	DNA polymerase III subunit beta 2099:3241 forward MW:42264	Regular	16831970	0	422643292	51	13	25	51.05	80779	42437	22361	0	4	Pass1	PepFrag1	None	9464993	NFLPVDNK	NFLPVDNK	55	8	6.78	2557	1	1	0	0	2225308	55735	Identified	159	1.1	b5y5y7	181807	872	110349564655678	180699129311357	0.0101	Yellow	11366	9464894	9464912	270044	814	814.00	1.00	1	9464894
NCDO2118_RS00010	DNA polymerase III subunit beta 2099:3241 forward MW:42264	Regular	16831970	0	422643292	51	13	25	51.05	80779	42437	22361	0	5	Pass2	PepFrag2	None	15748802	FISNVRPFTLQPR	FISNVRPFTLQPR	351	13	12.40	2567	0	0	0	0	2178671	55643	Identified	487	3.8	y5y7*y12	218555	1475	156658626443963	116658626443963	0.1772	Yellow	5101	15749247	15749255	228687	14312	14312.00	2.00	2	7879660
NCDO2118_RS00010	DNA polymerase III subunit beta 2099:3241 forward MW:42264	Regular	16831970	0	422643292	51	13	25	51.05	80779	42437	22361	0	6	Pass2	PepFrag2	None	6953723	SINSFK	SINSFK	206	6	10.10	2566	2	2	0	0	3042646	57094		745	1.2	y4y6	117216	636	894123915508906	138824783101781	0.0149	Yellow	4934	6953460	6953479	227578	1207	1207.00	1.00	1	6953460
NCDO2118_RS00010	DNA polymerase III subunit beta 2099:3241 forward MW:42264	Regular	16831970	0	422643292	51	13	25	51.05	80779	42437	22361	0	7	Pass2	MissedCleavage	None	15228125	FSINKNAFQNALR	FSINKNAFQNALR	3	13	11.49	2559	2	2	0	0	7729716	61143		1819	2.1	y7y10*y13	204312	1410	152021743589642	112021743589642	0.0344	Green	9753	15228092	15228102	260844	2779	2779.00	2.00	2	7619082
NCDO2118_RS00010	DNA polymerase III subunit beta 2099:3241 forward MW:42264	Regular	16831970	0	422643292	51	13	25	51.05	80779	42437	22361	0	8	Pass2	MissedCleavage	None	18039236	NEESGFVQLITPVRTN	NEESGFVQLITPVRTN	364	16	4.26	2560	0	0	0	0	3664598	57902	Missing	102	1.6	b4y8	306560	1662	169634290687124	730895271247495	0.0134	Yellow	20981	18039185	18039219	313979	1080	1080.00	3.00	3	6019777
NCDO2118_RS00010	DNA polymerase III subunit beta 2099:3241 forward MW:42264	Regular	16831970	0	422643292	51	13	25	51.05	80779	42437	22361	0	9	Pass2	VarMod	Phosphoryl STY(14)	25411942	GLDSEIYPHLQEISEGSSLKMK	GLDSEIYPHLQEISEGSSLKMK	116	22	4.63	2564	6	6	0	1	5801533	59897	Identified	3121	3.2	b2b7b18-H3PO4y6y9y10-H3PO4y13y15y20-H3PO4y22	319410	2283	209618805500007	169618805500007	0.0623	Yellow	30731	25412202	25412137	357138	5032	5032.00	2.52	2	12711137
NCDO2118_RS00010	DNA polymerase III subunit beta 2099:3241 forward MW:42264	Regular	16831970	0	422643292	51	13	25	51.05	80779	42437	22361	0	10	Pass2	VarMod	Phosphoryl STY(11)	24352793	LKIEVEENGITLIGSNGQISIK	LKIEVEENGITLIGSNGQISIK	33	22	4.56	2563	4	4	0	1	5061862	59304		995	3.0	b7b8*b15b19y9*y11*y15y16y18-H3PO4	414612	2259	208147143293446	640735716467231	0.0537	Yellow	23951	24352701	24352718	327041	4334	4334.00	3.75	4	6095730
NCDO2118_RS00010	DNA polymerase III subunit beta 2099:3241 forward MW:42264	Regular	16831970	0	422643292	51	13	25	51.05	80779	42437	22361	0	11	Pass2	VarMod	Phosphoryl STY(10)	13556831	NAFQNALRITK	NAFQNALRITK	8	11	11.49	2562	3	3	1	0	2695259	56567		1346	2.2	b9*y1y5-H3PO4y8y9y10	168570	1199	136449649027853	964496490278527	0.0462	Yellow	12828	13556844	13556861	277453	3730	3730.00	2.00	2	6783459
NCDO2118_RS00010	DNA polymerase III subunit beta 2099:3241 forward MW:42264	Regular	16831970	0	422643292	51	13	25	51.05	80779	42437	22361	0	12	Pass2	VarMod	Phosphoryl STY(*)	36027414	LIEGSYPDTNRLIPNEADYTLDLVFDAAQLR	LIEGSYPDTNRLIPNEADYTLDLVFDAAQLR	243	31	3.69	2565	2	2	0	0	5507800	59671	Identified	583	3.1	b3b4b7-H3PO4b12-H3PO4b13b13*b25*y2y18	409274	3262	265918736551367	929593682756834	0.0414	Yellow	27729	36027435	36027407	343969	3347	3347.00	4.00	4	9014413
NCDO2118_RS00010	DNA polymerase III subunit beta 2099:3241 forward MW:42264	Regular	16831970	0	422643292	51	13	25	51.05	80779	42437	22361	0	13	Pass2	VarMod	Phosphoryl STY(4)	37738673	EIFTETVFAVSTQENRPIFTGVHLETLSTGELK	EIFTETVFAVSTQENRPIFTGVHLETLSTGELK	143	33	4.42	2561	3	3	0	0	3377362	57547	Missing	1017	2.5	b9b23*b33y7y9y29*	419254	3453	276200219740423	981001098702114	0.0211	Yellow	23903	37738735	37738698	326822	1707	1707.00	4.00	4	9442238
NCDO2118_RS00010	DNA polymerase III subunit beta 2099:3241 forward MW:42264	Regular	10226290	0	422643292	9	1	25	2.63	57367	172101	24826	1	1	Pass1	PepFrag1	None	11566460	LLPLEDSELK	LLPLEDSELK	188	10	3.83	942	9	9	6	1	388599000	75992	Identified	24826	5.8	b2y2y4y5y6y7y8y9y10	266788	1103	129065442828005	890654428280055	10000	Green	11046	11566442	11566465	255332	57367	57367.00	1.98	2	5788258
NCDO2118_RS00010	DNA polymerase III subunit beta 2099:3241 forward MW:42264	Regular	23063590	0	422643292	68	15	25	53.16	105721	52154	27153	1	1	Pass1	PepFrag1	None	22771761	LIPNEADYTLDLVFDAAQLR	LIPNEADYTLDLVFDAAQLR	254	20	3.50	1825	16	16	10	1	302396100	78435	Identified	6283	5.1	b8*b9*b10*b10b11b12b12*b17y2y3y4y5y6y6*y7y7*y10y11y12y13y15y17y18	422681	2125	199832255582891	932215037219275	0.1933	Green	41008	22771751	22771769	439169	20434	20434.00	2.72	3	7597299
NCDO2118_RS00010	DNA polymerase III subunit beta 2099:3241 forward MW:42264	Regular	23063590	0	422643292	68	15	25	53.16	105721	52154	27153	0	2	Pass1	PepFrag1	None	8455091	QVLLTSGK	QVLLTSGK	102	8	10.10	1823	6	6	2	2	32657230	68769		3627	3.4	b2b3b6b8y2y5y6y8	160040	816	105573051186756	655730511867559	0.1631	Green	3371	8455116	8455143	212521	17241	17241.00	1.58	2	4232594
NCDO2118_RS00010	DNA polymerase III subunit beta 2099:3241 forward MW:42264	Regular	23063590	0	422643292	68	15	25	53.16	105721	52154	27153	0	3	Pass1	PepFrag1	None	21220703	EGNDLAISFNPEYLIDALK	EGNDLAISFNPEYLIDALK	322	19	3.59	1826	13	13	4	2	106953600	73921	Identified	6146	4.4	b4b4b5b5b6b6*b6b7b7*b7b10b12b16y2y4y7y9y9y10y12y13*y19	422339	1968	189864176634406	149864176634406	0.1370	Green	41088	21220700	21220688	439974	14479	14479.00	2.15	2	10615386
NCDO2118_RS00010	DNA polymerase III subunit beta 2099:3241 forward MW:42264	Regular	23063590	0	422643292	68	15	25	53.16	105721	52154	27153	0	4	Pass1	PepFrag1	None	22020925	GLDSEIYPHLQEISEGSSLK	GLDSEIYPHLQEISEGSSLK	116	20	4.16	1828	5	5	1	1	16000710	65671	Identified	1422	2.5	b7b11*y1y7y11*y12*y12y13y13y14y20	329029	2024	193449067074994	153449067074994	0.0270	Green	37375	22020941	22020924	405209	2853	2853.00	2.27	2	11015507
NCDO2118_RS00010	DNA polymerase III subunit beta 2099:3241 forward MW:42264	Regular	23063590	0	422643292	68	15	25	53.16	105721	52154	27153	0	5	Pass1	PepFrag1	None	15888329	NEESGFVQLITPVR	NEESGFVQLITPVR	364	14	4.26	1830	1	1	0	0	2082001	56814	Missing	66	2.1	b12	315570	1473	156516982104189	116516982104189	0.0239	Yellow	24958	15888318	15888334	336591	2532	2532.00	2.00	2	7949195
NCDO2118_RS00010	DNA polymerase III subunit beta 2099:3241 forward MW:42264	Regular	23063590	0	422643292	68	15	25	53.16	105721	52154	27153	0	6	Pass1	PepFrag1	None	12777133	LLTVMTTNGTVK	LLTVMTTNGTVK	281	12	10.10	1824	0	0	0	0	2583080	57751		316	1.7	b11y10	221439	1233	139017140768438	990171407684379	0.0170	Yellow	17907	12777076	12777101	306159	1795	1795.00	2.00	2	6393574
NCDO2118_RS00010	DNA polymerase III subunit beta 2099:3241 forward MW:42264	Regular	23063590	0	422643292	68	15	25	53.16	105721	52154	27153	0	7	Pass1	PepFrag1	None	9464993	NFLPVDNK	NFLPVDNK	55	8	6.78	1827	1	1	0	0	2803735	58107	Identified	595	1.2	b6y5*y8	175971	872	110349564655678	180699129311357	0.0085	Yellow	10945	9464914	9464940	270593	899	899.00	1.00	1	9464914
NCDO2118_RS00010	DNA polymerase III subunit beta 2099:3241 forward MW:42264	Regular	23063590	0	422643292	68	15	25	53.16	105721	52154	27153	0	8	Pass2	PepFrag2	None	9334901	NAFQNALR	NAFQNALR	8	8	11.05	1837	2	2	0	1	2162505	56979		76	1.2	b4y4	162789	847	108230228267445	68230228267445	0.0100	Yellow	12749	9334524	9334552	280708	1056	1056.00	2.00	2	4672299
NCDO2118_RS00010	DNA polymerase III subunit beta 2099:3241 forward MW:42264	Regular	23063590	0	422643292	68	15	25	53.16	105721	52154	27153	0	9	Pass2	PepFrag2	None	9185295	FDVILPSK	FDVILPSK	198	8	6.78	1829	1	1	0	0	371967	49334	Missing	150	1.2	b7b8	227285	877	110770988111791	181541976223582	0.0090	Red	24084	9185393	9185418	332658	951	951.00	1.00	1	9185393
NCDO2118_RS00010	DNA polymerase III subunit beta 2099:3241 forward MW:42264	Regular	23063590	0	422643292	68	15	25	53.16	105721	52154	27153	0	10	Pass2	MissedCleavage	None	18039236	NEESGFVQLITPVRTN	NEESGFVQLITPVRTN	364	16	4.26	1831	3	3	0	0	4895965	60528	Identified	993	1.8	b7b8b9*b9b11*b16y5y5*y7*y10	309266	1662	169634290687124	730895271247495	0.0142	Yellow	12173	18039007	18039047	277315	1505	1505.00	2.78	3	6019718
NCDO2118_RS00010	DNA polymerase III subunit beta 2099:3241 forward MW:42264	Regular	23063590	0	422643292	68	15	25	53.16	105721	52154	27153	0	11	Pass2	VarMod	Phosphoryl STY(6)	15968608	QVLLTSGKSEITLK	QVLLTSGKSEITLK	102	14	9.88	1834	2	2	0	0	1064206	53900		173	4.8	y1y11	260686	1474	156587812282011	116587812282011	0.2324	Red	39827	15968456	15968472	427988	24574	24574.00	2.02	2	7989264
NCDO2118_RS00010	DNA polymerase III subunit beta 2099:3241 forward MW:42264	Regular	23063590	0	422643292	68	15	25	53.16	105721	52154	27153	0	12	Pass2	VarMod	Phosphoryl STY(17)	21361239	LLPLEDSELKFDVILPSK	LLPLEDSELKFDVILPSK	188	18	4.06	1835	7	7	2	1	10570250	63870	Identified	2553	3.1	b2b6b8b11y4y8y16y16y17y17y18	400133	1980	190635199993294	870901333288629	0.0560	Green	8650	21361153	21361180	256346	5925	5925.00	3.44	3	7127100
NCDO2118_RS00010	DNA polymerase III subunit beta 2099:3241 forward MW:42264	Regular	23063590	0	422643292	68	15	25	53.16	105721	52154	27153	0	13	Pass2	VarMod	Phosphoryl STY(11)	24352793	LKIEVEENGITLIGSNGQISIK	LKIEVEENGITLIGSNGQISIK	33	22	4.56	1833	2	2	0	0	1719276	55983		621	3.3	b13y11y16y18y21	414109	2259	208147143293446	640735716467231	0.0533	Yellow	23082	24352760	24352772	328303	5632	5632.00	4.00	4	6095744
NCDO2118_RS00010	DNA polymerase III subunit beta 2099:3241 forward MW:42264	Regular	23063590	0	422643292	68	15	25	53.16	105721	52154	27153	0	14	Pass2	VarMod	Phosphoryl STY(11)	19240316	IRFISNVRPFTLQPR	IRFISNVRPFTLQPR	349	15	12.70	1836	3	3	0	0	7516801	62390	Identified	1849	2.6	b12*b13b14*y5y8y12y15	233789	1747	175369839368313	135369839368313	0.0386	Green	38085	19240320	19240320	412208	4076	4076.00	2.00	2	9625196
NCDO2118_RS00010	DNA polymerase III subunit beta 2099:3241 forward MW:42264	Regular	23063590	0	422643292	68	15	25	53.16	105721	52154	27153	0	15	Pass2	VarMod	Phosphoryl STY(*)	48794039	NFLPVDNKDASMLISGTGSVLLEAAFFENVVSQLPEVTLEFTEK	NFLPVDNKDASMLISGTGSVLLEAAFFENVVSQLPEVTLEFTEK	55	44	3.74	1832	6	6	1	0	14904950	65363	Identified	2283	2.8	b6b8b10b11*b16*b17b18y9-H3PO4y10-H3PO4y13-H3PO4y22-H3PO4y23y44	514839	4504	32973007048422	12486503524211	0.0167	Green	43124	48794222	48794024	462056	1769	1769.00	4.16	4	12206110
NCDO2118_RS00010	DNA polymerase III subunit beta 2099:3241 forward MW:42264	Regular	4947580	0.39	422643292	16	4	25	18.95	33734	38194.5	8730	1	1	Pass1	PepFrag1	None	11566460	LLPLEDSELK	LLPLEDSELK	188	10	3.83	1660	5	5	2	0	95444130	66741	Identified	6563	3.9	y2y4y5y6y7y8	267392	1103	129065442828005	890654428280055	0.5923	Green	8820	11566440	11566461	253827	19979	19979.00	2.00	2	5788256
NCDO2118_RS00010	DNA polymerase III subunit beta 2099:3241 forward MW:42264	Regular	4947580	0.39	422643292	16	4	25	18.95	33734	38194.5	8730	0	2	Pass1	PepFrag1	None	9464993	NFLPVDNK	NFLPVDNK	55	8	6.78	1659	5	5	3	1	97134700	66818	Identified	1556	2.3	b2y3y4y5y5*y6	202299	872	110349564655678	703495646556783	0.1626	Green	4445	9464928	9464953	204899	5484	5484.00	2.00	2	4737500
NCDO2118_RS00010	DNA polymerase III subunit beta 2099:3241 forward MW:42264	Regular	4947580	0.39	422643292	16	4	25	18.95	33734	38194.5	8730	0	3	Pass2	PepFrag2	None	29274844	LTVSGDSVVTTANSPEVGSVHEELTALSK	LTVSGDSVVTTANSPEVGSVHEELTALSK	293	29	4.16	1662	3	3	0	0	5122811	54039	Missing	359	3.4	b6b11b22*y12y17	287965	2721	235638000407032	117092000271354	0.1353	Yellow	13472	29274045	29273993	308380	4563	4563.00	3.00	3	9764730
NCDO2118_RS00010	DNA polymerase III subunit beta 2099:3241 forward MW:42264	Regular	4947580	0.39	422643292	16	4	25	18.95	33734	38194.5	8730	0	4	Pass2	MissedCleavage	None	29174513	LIPNEADYTLDLVFDAAQLRHTMDR	LIPNEADYTLDLVFDAAQLRHTMDR	254	25	4.12	1661	0	0	0	0	2395777	50738	Missing	98	2.2	y8*	334796	2699	234366152570116	771830762850581	0.0511	Yellow	17915	29174537	29174537	391286	1723	1723.00	4.00	4	7301189
NCDO2118_RS00010	DNA polymerase III subunit beta 2099:3241 forward MW:42264	Regular	4947580	0.39	422643292	16	4	25	18.95	33734	38194.5	8730	0	5	Pass2	InSource	None	5723039	PVDNK	NFLPVDNK	58	5	6.78	1659	3	3	1	0	32920100	0.0000	Missing	154	0.0	b3b4y3	202299	517	778789336328781	115757867265756	0.0588	Green	4443	5723044	5723061	204876	1985	1985.00	1.00	1	5723044
NCDO2118_RS00010	DNA polymerase III subunit beta 2099:3241 forward MW:42264	Regular	4811188	0.43	422643292	14	3	25	4.47	41896	55192.5	14844	1	1	Pass1	PepFrag1	None	11325269	NETISYYSR	NETISYYSR	234	9	6.84	1411	9	9	5	2	201828500	69872		12041	4.6	b2b3b3*b3b4b9y1y3y5y6y7y7y8y9	148616	998	120738746218848	807387462188479	0.8204	Green	3222	11325270	11325293	161418	34371	34371.00	1.95	2	5667671
NCDO2118_RS00010	DNA polymerase III subunit beta 2099:3241 forward MW:42264	Regular	4811188	0.43	422643292	14	3	25	4.47	41896	55192.5	14844	0	2	Pass1	PepFrag1	None	9464993	NFLPVDNK	NFLPVDNK	55	8	6.78	1412	2	2	0	0	1474434	48509	Missing	1930	1.7	b6y8y8*	193867	872	110349564655678	180699129311357	0.0579	Red	3332	9464983	9464998	162892	2424	2424.00	1.00	1	9464983
NCDO2118_RS00010	DNA polymerase III subunit beta 2099:3241 forward MW:42264	Regular	4811188	0.43	422643292	14	3	25	4.47	41896	55192.5	14844	0	3	Pass2	VarMod	Phosphoryl STY(*)	13576796	LLTVMTTNGTVK	LLTVMTTNGTVK	281	12	10.10	1413	1	1	0	0	1181393	47546		210	2.2	b6b10-H3PO4y10*	231619	1233	139017140768438	990171407684379	0.0765	Red	5639	13576791	13576806	189981	3203	3203.00	2.00	2	6793432
NCDO2118_RS00010	DNA polymerase III subunit beta 2099:3241 forward MW:42264	Regular	4811188	0.43	422643292	14	3	25	4.47	41896	55192.5	14844	0	4	Pass2	InSource	None	6753097	SYYSR	NETISYYSR	238	5	9.59	1411	2	2	0	0	1268050	0.0000		663	0.0	b5y5	148616	576	836966270640795	127393254128159	0.0256	Green	3223	6753096	6753113	161423	1072	1072.00	1.00	1	6753096
NCDO2118_RS00010	DNA polymerase III subunit beta 2099:3241 forward MW:42264	Regular	4811188	0.43	422643292	14	3	25	4.47	41896	55192.5	14844	0	5	Pass2	NeutralLoss_H2O	None	11145164	NETISYYSR	NETISYYSR	234	9	6.84	1411	0	0	0	0	822709	0.0000		0	0.0		148616	998	120738746218848	807387462188479	0.0197	Green	3228	11145066	11145089	161533	826	826.00	2.00	2	5577570
NCDO2118_RS00010	DNA polymerase III subunit beta 2099:3241 forward MW:42264	Regular	4134525	0.89	422643292	24	5	25	12.89	33862	20110.5	6408	1	1	Pass1	PepFrag1	None	11566460	LLPLEDSELK	LLPLEDSELK	188	10	3.83	1407	6	6	2	1	95908850	65983	Identified	3242	2.9	b2b9y4y6y7y8	265593	1103	129065442828005	890654428280055	0.2584	Green	8405	11566458	11566480	253729	8751	8751.00	2.00	2	5788266
NCDO2118_RS00010	DNA polymerase III subunit beta 2099:3241 forward MW:42264	Regular	4134525	0.89	422643292	24	5	25	12.89	33862	20110.5	6408	0	2	Pass1	PepFrag1	None	9464993	NFLPVDNK	NFLPVDNK	55	8	6.78	1406	5	5	3	2	76503890	65001	Identified	1322	2.1	b2b2*b3b4y5y5*y6	196960	872	110349564655678	703495646556783	0.1375	Green	4407	9464966	9464992	205098	4656	4656.00	2.00	2	4737519
NCDO2118_RS00010	DNA polymerase III subunit beta 2099:3241 forward MW:42264	Regular	4134525	0.89	422643292	24	5	25	12.89	33862	20110.5	6408	0	3	Pass2	VarMod	Phosphoryl STY(*)	36027414	LIEGSYPDTNRLIPNEADYTLDLVFDAAQLR	LIEGSYPDTNRLIPNEADYTLDLVFDAAQLR	243	31	3.69	1409	4	4	0	0	11357480	56717	Identified	835	4.6	b13y10y12y22y27	379721	3262	265918736551367	929593682756834	0.2955	Green	15046	36027486	36027486	348901	10007	10007.00	4.47	4	9014426
NCDO2118_RS00010	DNA polymerase III subunit beta 2099:3241 forward MW:42264	Regular	4134525	0.89	422643292	24	5	25	12.89	33862	20110.5	6408	0	4	Pass2	VarMod	Phosphoryl STY(20)	36027414	LIEGSYPDTNRLIPNEADYTLDLVFDAAQLR	LIEGSYPDTNRLIPNEADYTLDLVFDAAQLR	243	31	3.69	1410	3	3	0	0	4916767	53081	Identified	372	4.2	b6b19y7y9*y17*y18	379721	3262	265918736551367	929593682756834	0.2304	Yellow	15243	36027562	36027562	352347	7801	7801.00	4.00	4	9014445
NCDO2118_RS00010	DNA polymerase III subunit beta 2099:3241 forward MW:42264	Regular	4134525	0.89	422643292	24	5	25	12.89	33862	20110.5	6408	0	5	Pass2	VarMod	Phosphoryl STY(*)	29534442	SEITLKGLDSEIYPHLQEISEGSSLK	SEITLKGLDSEIYPHLQEISEGSSLK	110	26	4.35	1408	2	2	0	0	2193087	49575	Missing	222	1.8	b12-H3PO4y9y11	338468	2682	233380992913225	115587328608817	0.0247	Red	13806	29534457	29534377	325696	837	837.00	3.00	3	9851534
NCDO2118_RS00010	DNA polymerase III subunit beta 2099:3241 forward MW:42264	Regular	4134525	0.89	422643292	24	5	25	12.89	33862	20110.5	6408	0	6	Pass2	InSource	None	5723039	PVDNK	NFLPVDNK	58	5	6.78	1406	4	4	1	1	49319210	0.0000	Identified	415	0.0	b3y2y2*y3y3*y5	196960	517	778789336328781	115757867265756	0.0535	Green	4395	5723046	5723058	204944	1810	1810.00	1.00	1	5723046
NCDO2118_RS00010	DNA polymerase III subunit beta 2099:3241 forward MW:42264	Regular	1624072	1.66	422643292	11	7	25	2.63	28297	20529	5274	1	1	Pass1	PepFrag1	None	11566460	LLPLEDSELK	LLPLEDSELK	188	10	3.83	922	5	5	2	0	55789910	59572	Identified	2769	2.7	y2y4y6y7y8	274414	1103	129065442828005	890654428280055	0.2418	Green	7321	11566427	11566461	255338	6843	6843.00	2.00	2	5788250
NCDO2118_RS00010	DNA polymerase III subunit beta 2099:3241 forward MW:42264	Regular	1624072	1.66	422643292	11	7	25	2.63	28297	20529	5274	0	2	Pass2	PepFrag2	None	15888329	NEESGFVQLITPVR	NEESGFVQLITPVR	364	14	4.26	927	1	1	0	0	749587	40854	Missing	1175	3.3	y7y14	309181	1473	156516982104189	116516982104189	0.3005	Red	6119	15887819	15887829	231526	8504	8504.00	2.00	2	7948946
NCDO2118_RS00010	DNA polymerase III subunit beta 2099:3241 forward MW:42264	Regular	1624072	1.66	422643292	11	7	25	2.63	28297	20529	5274	0	3	Pass2	PepFrag2	None	15748802	FISNVRPFTLQPR	FISNVRPFTLQPR	351	13	12.40	926	1	1	0	0	505437	39143	Missing	325	1.6	b9y13	303217	1475	156658626443963	116658626443963	0.0490	Red	4812	15748209	15748220	214427	1387	1387.00	2.00	2	7879141
NCDO2118_RS00010	DNA polymerase III subunit beta 2099:3241 forward MW:42264	Regular	1624072	1.66	422643292	11	7	25	2.63	28297	20529	5274	0	4	Pass2	PepFrag2	None	8425346	VTIPALTK	VTIPALTK	25	8	10.10	925	1	1	0	0	3610515	47682	Missing	174	1.4	y7y7	188659	831	106862906810347	668629068103468	0.0485	Red	3213	8425048	8425086	186878	1373	1373.00	2.00	2	4217560
NCDO2118_RS00010	DNA polymerase III subunit beta 2099:3241 forward MW:42264	Regular	1624072	1.66	422643292	11	7	25	2.63	28297	20529	5274	0	5	Pass2	PepFrag2	None	26182443	NVFTNDEEEIEIFISGSQMLFR	NVFTNDEEEIEIFISGSQMLFR	212	22	3.58	928	0	0	0	0	604507	39920		43	1.7	y6*	462840	2398	216600316407505	104400210938337	0.0324	Red	11661	26182026	26181984	371852	917	917.00	3.00	3	8734057
NCDO2118_RS00010	DNA polymerase III subunit beta 2099:3241 forward MW:42264	Regular	1624072	1.66	422643292	11	7	25	2.63	28297	20529	5274	0	6	Pass2	MissedCleavage	None	16588782	MSQRLLPLEDSELK	MSQRLLPLEDSELK	184	14	4.44	923	0	0	0	0	966951	41960	Missing	89	1.8	y9	276518	1562	162759739925828	685064932838854	0.0559	Red	6567	16588673	16588719	239399	1581	1581.00	3.00	3	5536273
NCDO2118_RS00010	DNA polymerase III subunit beta 2099:3241 forward MW:42264	Regular	1624072	1.66	422643292	11	7	25	2.63	28297	20529	5274	0	7	Pass2	VarMod	Phosphoryl STY(7)	9984958	FDVILPSK	FDVILPSK	198	8	6.78	924	2	2	0	0	2006922	45131	Missing	567	2.3	b4b8y7y8	250521	877	110770988111791	181541976223582	0.2119	Red	10856	9984863	9984880	337846	5996	5996.00	1.00	1	9984863
NCDO2118_RS00010	DNA polymerase III subunit beta 2099:3241 forward MW:42264	Regular	1624072	1.66	422643292	11	7	25	2.63	28297	20529	5274	0	8	Pass2	InSource	None	9304779	PLEDSELK	LLPLEDSELK	190	8	3.83	922	1	1	0	0	800210	0.0000	Missing	132	0.0	y7	274414	855	108910656856658	689106568566584	0.0599	Green	7323	9304717	9304755	255390	1696	1696.00	2.00	2	4657395
NCDO2118_RS00010	DNA polymerase III subunit beta 2099:3241 forward MW:42264	Regular	1968108	1.82	422643292	11	3	25	2.37	47224	72513	11427	1	1	Pass1	PepFrag1	None	11325269	NETISYYSR	NETISYYSR	234	9	6.84	1568	7	7	4	1	82224250	62090		7798	4.1	b2b2b3b4*y3y4y5y6y7y7y9	154289	998	120738746218848	807387462188479	0.5118	Green	2927	11325299	11325315	161983	24171	24171.00	1.97	2	5667686
NCDO2118_RS00010	DNA polymerase III subunit beta 2099:3241 forward MW:42264	Regular	1968108	1.82	422643292	11	3	25	2.37	47224	72513	11427	0	2	Pass2	PepFrag2	None	9334901	NAFQNALR	NAFQNALR	8	8	11.05	1569	2	2	0	0	982840	42865		2269	2.3	b7y8	155201	847	108230228267445	17646045653489	0.1289	Red	4876	9334886	9334895	189167	6088	6088.00	1.34	1	9334886
NCDO2118_RS00010	DNA polymerase III subunit beta 2099:3241 forward MW:42264	Regular	1968108	1.82	422643292	11	3	25	2.37	47224	72513	11427	0	3	Pass2	VarMod	Phosphoryl STY(7)	12366123	LLPLEDSELK	LLPLEDSELK	188	10	3.83	1570	2	2	1	0	1713743	45280	Missing	1360	3.7	b6y9y10	248239	1103	129065442828005	890654428280055	0.3592	Red	5921	12366132	12366146	202528	16965	16965.00	2.00	2	6188103
NCDO2118_RS00010	DNA polymerase III subunit beta 2099:3241 forward MW:42264	Regular	4386284	2.05	422643292	19	4	25	4.47	269702	267771	52122	1	1	Pass1	PepFrag1	None	11325269	NETISYYSR	NETISYYSR	234	9	6.84	2116	10	10	7	3	180487600	68985		47341	6.5	b2b2b3b3b4b5b9*y3y4y5y5y6y6y7y7y8y9y9*	148089	998	120738746218848	807387462188479	0.3309	Green	4228	11325299	11325318	159599	89257	89257.00	1.92	2	5667686
NCDO2118_RS00010	DNA polymerase III subunit beta 2099:3241 forward MW:42264	Regular	4386284	2.05	422643292	19	4	25	4.47	269702	267771	52122	0	2	Pass2	PepFrag2	None	11566460	LLPLEDSELK	LLPLEDSELK	188	10	3.83	2117	2	2	0	0	1225662	47305	Missing	749	6.4	y1y5y5	262780	1103	129065442828005	890654428280055	0.2828	Red	16898	11566310	11566327	262523	76280	76280.00	2.00	2	5788191
NCDO2118_RS00010	DNA polymerase III subunit beta 2099:3241 forward MW:42264	Regular	4386284	2.05	422643292	19	4	25	4.47	269702	267771	52122	0	3	Pass2	PepFrag2	None	9334901	NAFQNALR	NAFQNALR	8	8	11.05	2119	2	2	0	1	3767891	52182		152	1.2	b4b8*y4	178440	847	108230228267445	68230228267445	0.0037	Yellow	6719	9334568	9334588	180667	1011	1011.00	2.00	2	4672320
NCDO2118_RS00010	DNA polymerase III subunit beta 2099:3241 forward MW:42264	Regular	4386284	2.05	422643292	19	4	25	4.47	269702	267771	52122	0	4	Pass2	VarMod	Phosphoryl STY(*)	18838899	NEESGFVQLITPVRTN	NEESGFVQLITPVRTN	364	16	4.26	2118	3	3	1	0	1116132	46898	Missing	1314	8.3	b5b8*b8-H3PO4y2y3y7*y9y10	288463	1662	169634290687124	730895271247495	0.3615	Red	8754	18838801	18838828	195817	97488	97488.00	3.00	3	6286315
NCDO2118_RS00010	DNA polymerase III subunit beta 2099:3241 forward MW:42264	Regular	4386284	2.05	422643292	19	4	25	4.47	269702	267771	52122	0	5	Pass2	InSource	None	6753097	SYYSR	NETISYYSR	238	5	9.59	2116	2	2	0	0	1158408	0.0000		2566	0.0	b2b5y5	148089	576	836966270640795	127393254128159	0.0210	Green	4231	6753099	6753118	159624	5666	5666.00	1.00	1	6753099
NCDO2118_RS00010	DNA polymerase III subunit beta 2099:3241 forward MW:42264	Regular	2030967	2.36	422643292	11	3	25	4.47	23604	54576	6770	1	1	Pass1	PepFrag1	None	11325269	NETISYYSR	NETISYYSR	234	9	6.84	1612	10	10	5	3	79240920	62067		5258	3.7	b2b3b5b8y1y3y4y5y6y7y8y8y9	135766	998	120738746218848	807387462188479	0.7707	Green	3353	11325330	11325346	161545	18192	18192.00	1.96	2	5667701
NCDO2118_RS00010	DNA polymerase III subunit beta 2099:3241 forward MW:42264	Regular	2030967	2.36	422643292	11	3	25	4.47	23604	54576	6770	0	2	Pass2	PepFrag2	None	9334901	NAFQNALR	NAFQNALR	8	8	11.05	1614	1	1	0	0	7324902	51725		441	1.2	y5*y8	180584	847	108230228267445	17646045653489	0.0429	Yellow	5416	9334577	9334584	184063	1012	1012.00	1.00	1	9334577
NCDO2118_RS00010	DNA polymerase III subunit beta 2099:3241 forward MW:42264	Regular	2030967	2.36	422643292	11	3	25	4.47	23604	54576	6770	0	3	Pass2	VarMod	Phosphoryl STY(*)	23571424	LIPNEADYTLDLVFDAAQLR	LIPNEADYTLDLVFDAAQLR	254	20	3.50	1613	0	0	0	0	1180163	43796	Missing	1071	2.9	b12y6*	425325	2125	199832255582891	932215037219275	0.1864	Red	10755	23571361	23571350	241962	4400	4400.00	3.00	3	7863836
NCDO2118_RS00010	DNA polymerase III subunit beta 2099:3241 forward MW:42264	Regular	2821187	3.1	422643292	16	4	25	6.58	46721	106959	15506	1	1	Pass1	PepFrag1	None	11325269	NETISYYSR	NETISYYSR	234	9	6.84	1975	8	8	5	2	119116800	65264		12688	4.7	b2b2b3b3b4b6y3y4y5y5y6y6y7y7y9	150151	998	120738746218848	807387462188479	0.7631	Green	3534	11325257	11325274	160016	35653	35653.00	1.95	2	5667665
NCDO2118_RS00010	DNA polymerase III subunit beta 2099:3241 forward MW:42264	Regular	2821187	3.1	422643292	16	4	25	6.58	46721	106959	15506	0	2	Pass2	VarMod	Phosphoryl STY(*)	13576796	LLTVMTTNGTVK	LLTVMTTNGTVK	281	12	10.10	1976	0	0	0	0	1516131	46312		232	2.2	b11*b12y8	220289	1233	139017140768438	990171407684379	0.0727	Red	11331	13576896	13576908	231501	3395	3395.00	2.00	2	6793484
NCDO2118_RS00010	DNA polymerase III subunit beta 2099:3241 forward MW:42264	Regular	2821187	3.1	422643292	16	4	25	6.58	46721	106959	15506	0	3	Pass2	VarMod	Phosphoryl STY(15)	18838899	NEESGFVQLITPVRTN	NEESGFVQLITPVRTN	364	16	4.26	1977	3	3	1	1	4540119	51075	Missing	275	2.3	b8*b9b10*b16*y6y7	281189	1662	169634290687124	730895271247495	0.0608	Yellow	7039	18838849	18838845	193835	2839	2839.00	2.83	3	6286332
NCDO2118_RS00010	DNA polymerase III subunit beta 2099:3241 forward MW:42264	Regular	2821187	3.1	422643292	16	4	25	6.58	46721	106959	15506	0	4	Pass2	VarMod	Phosphoryl STY(*)	18838899	NEESGFVQLITPVRTN	NEESGFVQLITPVRTN	364	16	4.26	1978	2	2	0	1	4573445	51107	Missing	370	1.9	b6*b8b9*y8y10*	281189	1662	169634290687124	730895271247495	0.0377	Yellow	8313	18838892	18838888	204876	1761	1761.00	3.00	3	6286346
NCDO2118_RS00010	DNA polymerase III subunit beta 2099:3241 forward MW:42264	Regular	2821187	3.1	422643292	16	4	25	6.58	46721	106959	15506	0	5	Pass2	InSource	None	8894414	TISYYSR	NETISYYSR	236	7	9.59	1975	1	1	0	0	3087454	0.0000		1171	0.0	y3y5y7	150151	793	103579805793912	167159611587823	0.0336	Green	3549	8894474	8894487	160251	1570	1570.00	1.00	1	8894474
NCDO2118_RS00010	DNA polymerase III subunit beta 2099:3241 forward MW:42264	Regular	2821187	3.1	422643292	16	4	25	6.58	46721	106959	15506	0	6	Pass2	InSource	None	6753097	SYYSR	NETISYYSR	238	5	9.59	1975	2	2	0	0	1413284	0.0000		770	0.0	b5y5	150151	576	836966270640795	127393254128159	0.0322	Green	3539	6753100	6753117	160139	1503	1503.00	1.00	1	6753100
NCDO2118_RS00015	ATP-dependent helicase 3347:6646 forward MW:127070	Regular	1821662	1.19	1272970924	37	14	94	7.73	103346	11568	7978	1	1	Pass1	PepFrag1	None	16277962	SELGNFSVDDIYLR	SELGNFSVDDIYLR	878	14	3.70	2509	7	7	4	1	73698910	61279		1352	2.6	b4b6*b7y6y8y9y10y11y12	331296	1482	157153878346384	117153878346384	0.0455	Green	12617	16277979	16277976	319032	4699	4699.00	2.00	2	8144026
NCDO2118_RS00015	ATP-dependent helicase 3347:6646 forward MW:127070	Regular	1821662	1.19	1272970924	37	14	94	7.73	103346	11568	7978	0	2	Pass1	PepFrag1	None	14657474	IVGNFFHEVFEK	IVGNFFHEVFEK	789	12	5.30	2513	0	0	0	0	801353	41643		241	2.3	b11y2y6y10*	312323	1354	147969455979385	107969455979385	0.0362	Red	7218	14657424	14657434	246703	3740	3740.00	2.00	2	7333749
NCDO2118_RS00015	ATP-dependent helicase 3347:6646 forward MW:127070	Regular	1821662	1.19	1272970924	37	14	94	7.73	103346	11568	7978	0	3	Pass1	PepFrag1	None	11585790	LYASVSSFER	LYASVSSFER	752	10	7.00	2508	5	5	2	1	27195080	56950		1342	2.0	b2b5y5y6y8y9y9	207214	1048	124738491959315	847384919593145	0.0303	Green	4808	11585729	11585756	216147	3129	3129.00	2.00	2	5797901
NCDO2118_RS00015	ATP-dependent helicase 3347:6646 forward MW:127070	Regular	1821662	1.19	1272970924	37	14	94	7.73	103346	11568	7978	0	4	Pass1	PepFrag1	None	31405092	FVIGTYSDENSLTAGSETIYISTSQMIGR	FVIGTYSDENSLTAGSETIYISTSQMIGR	215	29	3.83	2511	0	0	0	0	3802080	48405		336	1.8	b8y10*y10y11	344002	2881	244787069446758	579148277787034	0.0074	Red	9156	31405002	31405002	270058	762	762.00	5.00	5	6289059
NCDO2118_RS00015	ATP-dependent helicase 3347:6646 forward MW:127070	Regular	1821662	1.19	1272970924	37	14	94	7.73	103346	11568	7978	0	5	Pass2	PepFrag2	None	12826314	LADGEFDFQLK	LADGEFDFQLK	175	11	3.70	2521	2	2	0	0	2367708	46348		1034	5.9	b8y5*y7y11y11*	284929	1173	134469867085327	944698670853269	0.5343	Red	13728	12826286	12826307	338415	55214	55214.00	1.88	2	6418179
NCDO2118_RS00015	ATP-dependent helicase 3347:6646 forward MW:127070	Regular	1821662	1.19	1272970924	37	14	94	7.73	103346	11568	7978	0	6	Pass2	PepFrag2	None	19589930	ENLLGNDSPLQAFLGTNR	ENLLGNDSPLQAFLGTNR	441	18	4.07	2512	2	2	0	0	3822363	48428	Missing	314	2.0	b10*y15y18	329533	1800	178899023871932	138899023871932	0.0171	Red	15161	19590173	19590135	371341	1770	1770.00	2.00	2	9800123
NCDO2118_RS00015	ATP-dependent helicase 3347:6646 forward MW:127070	Regular	1821662	1.19	1272970924	37	14	94	7.73	103346	11568	7978	0	7	Pass2	PepFrag2	None	24472527	VYYIVPSSMSFEKEKEILER	VYYIVPSSMSFEKEKEILER	29	20	4.73	2510	7	7	3	2	24177350	56439	Identified	1408	2.0	b4b5b6b9b11b11y3y4y7y11y15y16	333516	2286	209802399826473	169802399826473	0.0147	Yellow	13746	24472378	24472268	338653	1515	1515.00	2.48	2	12241226
NCDO2118_RS00015	ATP-dependent helicase 3347:6646 forward MW:127070	Regular	1821662	1.19	1272970924	37	14	94	7.73	103346	11568	7978	0	8	Pass2	MissedCleavage	None	12327031	SVISMIGKIER	SVISMIGKIER	683	11	10.12	2516	4	4	1	0	1305159	43761		702	1.8	y1y3y4y11	226492	1187	135537700583107	955377005831068	0.0202	Red	9998	12327024	12327047	280346	2084	2084.00	2.00	2	6168548
NCDO2118_RS00015	ATP-dependent helicase 3347:6646 forward MW:127070	Regular	1821662	1.19	1272970924	37	14	94	7.73	103346	11568	7978	0	9	Pass2	MissedCleavage	None	15008016	SQAEILAELKGEGR	SQAEILAELKGEGR	1083	14	4.56	2517	3	3	0	0	2619374	46787		479	1.9	b1b5y4y8y14*	221392	1399	151230055145575	111230055145575	0.0187	Red	5614	15007998	15008005	226319	1932	1932.00	2.12	2	7509035
NCDO2118_RS00015	ATP-dependent helicase 3347:6646 forward MW:127070	Regular	1821662	1.19	1272970924	37	14	94	7.73	103346	11568	7978	0	10	Pass2	MissedCleavage	None	14837328	YFRIWEAENQK	YFRIWEAENQK	293	11	7.03	2514	0	0	0	0	4176581	48813		120	1.3	b8y7	243607	1341	147020812808369	107020812808369	0.0089	Red	10011	14837333	14837342	280595	915	915.00	2.00	2	7423703
NCDO2118_RS00015	ATP-dependent helicase 3347:6646 forward MW:127070	Regular	1821662	1.19	1272970924	37	14	94	7.73	103346	11568	7978	0	11	Pass2	MissedCleavage	None	18429596	IWEAENQKVEIEGVAK	IWEAENQKVEIEGVAK	296	16	4.26	2515	1	1	0	0	1691294	44887		45	1.4	b8	255420	1719	173490974042038	133490974042038	0.0074	Red	9165	18429852	18429828	270229	766	766.00	2.00	2	9219963
NCDO2118_RS00015	ATP-dependent helicase 3347:6646 forward MW:127070	Regular	1821662	1.19	1272970924	37	14	94	7.73	103346	11568	7978	0	12	Pass2	VarMod	Phosphoryl STY(*)	15748494	VFWSSIFRILVK	VFWSSIFRILVK	707	12	11.49	2519	1	1	0	0	2838068	47135		71	4.3	y9y11	404880	1444	154455874139158	629705827594386	0.2104	Red	5002	15748485	15748530	218546	21740	21740.00	2.88	3	5256210
NCDO2118_RS00015	ATP-dependent helicase 3347:6646 forward MW:127070	Regular	1821662	1.19	1272970924	37	14	94	7.73	103346	11568	7978	0	13	Pass2	VarMod	Phosphoryl STY(9)	20209838	TELLTANLSVENLPDSPK	TELLTANLSVENLPDSPK	126	18	3.83	2518	2	2	0	0	2399473	46406	Identified	269	2.5	b7b13b14y5	323051	1816	17995760182712	13995760182712	0.0294	Red	9252	20209749	20209704	271405	3040	3040.00	2.30	2	10109911
NCDO2118_RS00015	ATP-dependent helicase 3347:6646 forward MW:127070	Regular	1821662	1.19	1272970924	37	14	94	7.73	103346	11568	7978	0	14	Pass2	VarMod	Phosphoryl STY(*)	18429096	QTATVLKETVSTDELK	QTATVLKETVSTDELK	850	16	4.44	2520	3	3	0	0	2150277	45930		265	2.0	b11*b13y5y6y16	241835	1663	169702328105566	129702328105566	0.0197	Red	14402	18429025	18429001	352112	2040	2040.00	2.00	2	9219549
NCDO2118_RS00015	ATP-dependent helicase 3347:6646 forward MW:127070	Regular	1735160	2.99	1272970924	38	16	94	7.28	56500	19465	7123	1	1	Pass1	PepFrag1	None	10725058	YFTQDATAR	YFTQDATAR	830	9	6.73	3569	0	0	0	0	3879593	48281		75	3.0	y8	145833	949	116753643531341	767536435313411	0.1889	Red	2516	10724950	10724975	153762	10672	10672.00	2.00	2	5367511
NCDO2118_RS00015	ATP-dependent helicase 3347:6646 forward MW:127070	Regular	1735160	2.99	1272970924	38	16	94	7.28	56500	19465	7123	0	2	Pass1	PepFrag1	None	10165623	TDDVVNLLK	TDDVVNLLK	381	9	3.88	3565	9	9	7	2	76051450	61204		1378	2.3	b2b3y3y4y5y6y7y8y9	230399	964	11798070585263	779807058526301	0.0932	Green	14322	10165597	10165623	253763	5264	5264.00	1.88	2	5087835
NCDO2118_RS00015	ATP-dependent helicase 3347:6646 forward MW:127070	Regular	1735160	2.99	1272970924	38	16	94	7.28	56500	19465	7123	0	3	Pass1	PepFrag1	None	9764833	ELVETEEK	ELVETEEK	694	8	3.79	3568	0	0	0	0	1450502	44009		118	1.9	b5y6	146500	893	112114195987893	721141959878926	0.0625	Red	6956	9764730	9764756	194338	3529	3529.00	2.00	2	4887401
NCDO2118_RS00015	ATP-dependent helicase 3347:6646 forward MW:127070	Regular	1735160	2.99	1272970924	38	16	94	7.28	56500	19465	7123	0	4	Pass1	PepFrag1	None	15637901	YDGLVLEEAADQIK	YDGLVLEEAADQIK	980	14	3.59	3566	6	6	3	2	75710580	61185		1208	2.3	b4b5b12y5y8y9y10	289957	1449	154812215031248	114812215031248	0.0595	Green	18185	15637914	15637916	291551	3364	3364.00	2.00	2	7823993
NCDO2118_RS00015	ATP-dependent helicase 3347:6646 forward MW:127070	Regular	1735160	2.99	1272970924	38	16	94	7.28	56500	19465	7123	0	5	Pass1	PepFrag1	None	19850087	IQEVNLFESLEHIGNSR	IQEVNLFESLEHIGNSR	666	17	4.53	3567	1	1	0	0	3030683	47209		31	1.7	b13	284061	1829	180815408902994	140815408902994	0.0225	Red	14911	19850213	19850178	258725	1274	1274.00	2.00	2	9930143
NCDO2118_RS00015	ATP-dependent helicase 3347:6646 forward MW:127070	Regular	1735160	2.99	1272970924	38	16	94	7.28	56500	19465	7123	0	6	Pass1	PepFrag1	None	10175000	IWEAENQK	IWEAENQK	296	8	4.26	3564	2	2	1	0	7127461	50923		192	1.2	y6y7	134331	917	114114068971594	741140689715936	0.0176	Red	1682	10174968	10174993	139371	997	997.00	2.00	2	5092520
NCDO2118_RS00015	ATP-dependent helicase 3347:6646 forward MW:127070	Regular	1735160	2.99	1272970924	38	16	94	7.28	56500	19465	7123	0	7	Pass2	PepFrag2	None	13277515	SGQIAINPIMKR	SGQIAINPIMKR	1031	12	11.49	3579	3	3	0	0	622347	40334	Missing	607	1.9	b10y1y6	213920	1267	141561137633036	101561137633036	0.0386	Red	4136	13278000	13278015	169460	2179	2179.00	2.00	2	6644036
NCDO2118_RS00015	ATP-dependent helicase 3347:6646 forward MW:127070	Regular	1735160	2.99	1272970924	38	16	94	7.28	56500	19465	7123	0	8	Pass2	VarMod	Phosphoryl STY(1)	17228251	YIYAIGLSQTNFPR	YIYAIGLSQTNFPR	567	14	9.59	3572	4	4	0	0	3706879	48083	Missing	1245	3.2	b5b14y4y13y14	303881	1518	159688686462042	119688686462042	0.1487	Red	14310	17228134	17228124	253634	8400	8400.00	2.00	2	8619103
NCDO2118_RS00015	ATP-dependent helicase 3347:6646 forward MW:127070	Regular	1735160	2.99	1272970924	38	16	94	7.28	56500	19465	7123	0	9	Pass2	VarMod	Phosphoryl STY(2)	17268160	LTKVLHDVDSNYSR	LTKVLHDVDSNYSR	816	14	7.77	3578	1	1	0	0	1704234	44709		402	3.2	y3y4y6	182561	1517	1596185475844	664123650562665	0.1437	Red	4968	17268220	17268252	177406	8121	8121.00	3.00	3	5762789
NCDO2118_RS00015	ATP-dependent helicase 3347:6646 forward MW:127070	Regular	1735160	2.99	1272970924	38	16	94	7.28	56500	19465	7123	0	10	Pass2	VarMod	Phosphoryl STY(10)	18108445	MAFSSVNEVYNKLTK	MAFSSVNEVYNKLTK	255	15	9.63	3575	3	3	0	1	12251100	53275		939	2.8	b9y6y11*y15	258754	1611	166146039964408	126146039964408	0.0936	Yellow	16742	18108499	18108482	276011	5288	5288.00	2.12	2	9059286
NCDO2118_RS00015	ATP-dependent helicase 3347:6646 forward MW:127070	Regular	1735160	2.99	1272970924	38	16	94	7.28	56500	19465	7123	0	11	Pass2	VarMod	Oxidation M(1);Phosphoryl STY(14)	18268394	MAFSSVNEVYNKLTK	MAFSSVNEVYNKLTK	255	15	9.63	3576	1	1	0	0	1829133	45016		189	2.0	y8*y9y11-H3PO4y14*	258754	1611	166146039964408	126146039964408	0.0365	Red	13955	18268471	18268452	250546	2064	2064.00	2.00	2	9139272
NCDO2118_RS00015	ATP-dependent helicase 3347:6646 forward MW:127070	Regular	1735160	2.99	1272970924	38	16	94	7.28	56500	19465	7123	0	12	Pass2	VarMod	Phosphoryl STY(9);Phosphoryl STY(12)	19228759	QTATVLKETVSTDELK	QTATVLKETVSTDELK	850	16	4.44	3573	3	3	0	0	5378136	49700		291	1.9	b9*b10*y6y6y10y12	229050	1663	169702328105566	129702328105566	0.0291	Red	18630	19228851	19228823	297439	1644	1644.00	2.00	2	9619462
NCDO2118_RS00015	ATP-dependent helicase 3347:6646 forward MW:127070	Regular	1735160	2.99	1272970924	38	16	94	7.28	56500	19465	7123	0	13	Pass2	VarMod	Phosphoryl STY(2)	15156039	FTEAFNESEFSK	FTEAFNESEFSK	421	12	3.96	3571	0	0	0	0	1983458	45368		37	1.4	y5	248417	1269	141710070988055	101710070988055	0.0181	Red	20078	15156007	15156012	319139	1025	1025.00	2.00	2	7583040
NCDO2118_RS00015	ATP-dependent helicase 3347:6646 forward MW:127070	Regular	1735160	2.99	1272970924	38	16	94	7.28	56500	19465	7123	0	14	Pass2	VarMod	Phosphoryl STY(6)	9674860	AIENITVK	AIENITVK	994	8	7.00	3574	2	2	0	0	1986155	45374		235	1.2	b3b4y2y3-H3PO4	163770	853	108740749392557	687407493925565	0.0172	Red	7856	9674853	9674880	201435	972	972.00	2.00	2	4842463
NCDO2118_RS00015	ATP-dependent helicase 3347:6646 forward MW:127070	Regular	1735160	2.99	1272970924	38	16	94	7.28	56500	19465	7123	0	15	Pass2	VarMod	Oxidation M(9)	15657556	VYYIVPSSMSFEK	VYYIVPSSMSFEK	29	13	6.84	3570	1	1	0	0	4407668	48835	Identified	70	1.4	b3y8	298998	1428	153312808395605	113312808395605	0.0152	Red	12763	15657546	15657548	239331	858	858.00	2.00	2	7833809
NCDO2118_RS00015	ATP-dependent helicase 3347:6646 forward MW:127070	Regular	1735160	2.99	1272970924	38	16	94	7.28	56500	19465	7123	0	16	Pass2	VarMod	Phosphoryl STY(*)	17268160	LTKVLHDVDSNYSR	LTKVLHDVDSNYSR	816	14	7.77	3577	2	2	0	0	1021537	42486		106	1.4	b5b7y2	182561	1517	1596185475844	664123650562665	0.0150	Red	3693	17268026	17268058	165431	849	849.00	3.00	3	5762724
NCDO2118_RS00015	ATP-dependent helicase 3347:6646 forward MW:127070	Regular	1179013	3.17	1272970924	36	16	94	9.74	152851	93554	8634	1	1	Pass1	PepFrag1	None	9924935	DYELVEPK	DYELVEPK	556	8	3.83	2674	1	1	0	0	433886	37089	Missing	324	6.3	b3b4y1y4	184097	904	113033000047199	730330000471995	0.5862	Red	5646	9924837	9924865	203047	89601	89601.00	2.00	2	4967455
NCDO2118_RS00015	ATP-dependent helicase 3347:6646 forward MW:127070	Regular	1179013	3.17	1272970924	36	16	94	9.74	152851	93554	8634	0	2	Pass1	PepFrag1	None	14356376	FTEAFNESEFSK	FTEAFNESEFSK	421	12	3.96	2668	4	4	0	1	6033168	48521		715	1.8	b2b3b12y8y10	244694	1269	141710070988055	101710070988055	0.0136	Red	7631	14356266	14356275	224677	2079	2079.00	2.00	2	7183170
NCDO2118_RS00015	ATP-dependent helicase 3347:6646 forward MW:127070	Regular	1179013	3.17	1272970924	36	16	94	9.74	152851	93554	8634	0	3	Pass1	PepFrag1	None	16277962	SELGNFSVDDIYLR	SELGNFSVDDIYLR	878	14	3.70	2678	0	0	0	0	1300869	41858		39	1.9	y10*	329462	1482	157153878346384	117153878346384	0.0123	Red	12728	16277893	16277886	308433	1874	1874.00	2.00	2	8143983
NCDO2118_RS00015	ATP-dependent helicase 3347:6646 forward MW:127070	Regular	1179013	3.17	1272970924	36	16	94	9.74	152851	93554	8634	0	4	Pass1	PepFrag1	None	15637901	YDGLVLEEAADQIK	YDGLVLEEAADQIK	980	14	3.59	2672	6	6	3	1	69991820	59166		684	1.7	b3b4y6y8y9y10	286539	1449	154812215031248	114812215031248	0.0089	Green	12090	15637885	15637884	292524	1357	1357.00	2.00	2	7823979
NCDO2118_RS00015	ATP-dependent helicase 3347:6646 forward MW:127070	Regular	1179013	3.17	1272970924	36	16	94	9.74	152851	93554	8634	0	5	Pass1	PepFrag1	None	17008378	LDQLSSDYLGAIDYK	LDQLSSDYLGAIDYK	897	15	3.59	2671	4	4	0	0	4382849	47133		191	1.6	b3y7y9y11y13	287674	1561	162690266126654	122690266126654	0.0074	Red	10691	17008350	17008336	265434	1133	1133.00	2.00	2	8509211
NCDO2118_RS00015	ATP-dependent helicase 3347:6646 forward MW:127070	Regular	1179013	3.17	1272970924	36	16	94	9.74	152851	93554	8634	0	6	Pass1	PepFrag1	None	10165623	TDDVVNLLK	TDDVVNLLK	381	9	3.88	2670	3	3	0	0	3686474	46381		173	1.3	b3y5y7	233246	964	11798070585263	779807058526301	0.0072	Red	9911	10165543	10165571	254928	1095	1095.00	2.00	2	5087808
NCDO2118_RS00015	ATP-dependent helicase 3347:6646 forward MW:127070	Regular	1179013	3.17	1272970924	36	16	94	9.74	152851	93554	8634	0	7	Pass1	PepFrag1	None	11635539	NSTLLSDEER	NSTLLSDEER	584	10	3.83	2675	2	2	0	0	3139196	45683		396	1.3	y5y10	190476	1040	124102880085705	841028800857052	0.0068	Red	8553	11635414	11635437	235287	1036	1036.00	2.00	2	5822743
NCDO2118_RS00015	ATP-dependent helicase 3347:6646 forward MW:127070	Regular	1179013	3.17	1272970924	36	16	94	9.74	152851	93554	8634	0	8	Pass1	PepFrag1	None	10735302	QLPYYFDK	QLPYYFDK	67	8	6.67	2669	1	1	0	0	2386053	44492	Missing	124	1.2	y4	213426	971	118551154443402	197102308886804	0.0062	Red	7840	10735253	10735259	226547	952	952.00	1.00	1	10735253
NCDO2118_RS00015	ATP-dependent helicase 3347:6646 forward MW:127070	Regular	1179013	3.17	1272970924	36	16	94	9.74	152851	93554	8634	0	9	Pass1	PepFrag1	None	19698563	LANDYANYSEFGDFTSR	LANDYANYSEFGDFTSR	158	17	3.70	2673	2	2	0	0	2388826	44497		451	1.5	b7b17y9	271030	1728	174096	134096	0.0052	Red	12677	19698623	19698580	306961	791	791.00	2.00	2	9854348
NCDO2118_RS00015	ATP-dependent helicase 3347:6646 forward MW:127070	Regular	1179013	3.17	1272970924	36	16	94	9.74	152851	93554	8634	0	10	Pass2	PepFrag2	None	9764833	ELVETEEK	ELVETEEK	694	8	3.79	2676	2	2	0	0	2110625	43959		205	2.7	b7y3y6y8	137339	893	112114195987893	721141959878926	0.0603	Red	5880	9764703	9764732	206153	9217	9217.00	2.00	2	4887388
NCDO2118_RS00015	ATP-dependent helicase 3347:6646 forward MW:127070	Regular	1179013	3.17	1272970924	36	16	94	9.74	152851	93554	8634	0	11	Pass2	PepFrag2	None	10725058	YFTQDATAR	YFTQDATAR	830	9	6.73	2677	1	1	0	0	1652438	42896		112	2.1	y8	143155	949	116753643531341	767536435313411	0.0253	Red	1997	10724934	10724961	154599	3874	3874.00	2.00	2	5367504
NCDO2118_RS00015	ATP-dependent helicase 3347:6646 forward MW:127070	Regular	1179013	3.17	1272970924	36	16	94	9.74	152851	93554	8634	0	12	Pass2	MissedCleavage	None	11536364	QKISQGAFFK	QKISQGAFFK	315	10	10.60	2679	0	0	0	0	2976241	45452		30	2.3	b5	201659	1080	127264948037977	872649480379768	0.0295	Red	3393	11536323	11536347	174639	4513	4513.00	2.00	2	5773198
NCDO2118_RS00015	ATP-dependent helicase 3347:6646 forward MW:127070	Regular	1179013	3.17	1272970924	36	16	94	9.74	152851	93554	8634	0	13	Pass2	MissedCleavage	None	14486751	ELVETEEKNDDK	ELVETEEKNDDK	694	12	3.82	2681	1	1	0	0	913622	40323		49	1.7	y8	140847	1306	144451398948881	104451398948881	0.0104	Red	2457	14486569	14486577	162127	1583	1583.00	2.00	2	7248321
NCDO2118_RS00015	ATP-dependent helicase 3347:6646 forward MW:127070	Regular	1179013	3.17	1272970924	36	16	94	9.74	152851	93554	8634	0	14	Pass2	MissedCleavage	None	24012034	FTEAFNESEFSKIELVNQLR	FTEAFNESEFSKIELVNQLR	421	20	4.26	2680	0	0	0	0	2638891	44929		338	1.9	b19y4*y7*	363730	2213	205311799814618	968745332097454	0.0084	Red	13713	24012180	24012157	338981	1281	1281.00	3.00	3	8010775
NCDO2118_RS00015	ATP-dependent helicase 3347:6646 forward MW:127070	Regular	1179013	3.17	1272970924	36	16	94	9.74	152851	93554	8634	0	15	Pass2	VarMod	Phosphoryl STY(*)	12435202	NSTLLSDEER	NSTLLSDEER	584	10	3.83	2682	6	6	1	1	11954660	51491		3039	4.5	b4b5b5*b5b10b10*y4y5y5y7y10	190476	1040	124102880085705	841028800857052	0.1886	Yellow	8152	12435235	12435255	229662	28827	28827.00	1.91	2	6222654
NCDO2118_RS00015	ATP-dependent helicase 3347:6646 forward MW:127070	Regular	1179013	3.17	1272970924	36	16	94	9.74	152851	93554	8634	0	16	Pass2	VarMod	Oxidation M(7)	14866492	FEANVHMNEHSR	FEANVHMNEHSR	1066	12	6.03	2683	2	2	0	0	1080306	41051		1672	1.4	b2b7y7y8y9y10*y10y11	116601	1298	143860896543512	103860896543512	0.0063	Red	11827	14866616	14866621	287050	964	964.00	2.00	2	7438344
NCDO2118_RS00015	ATP-dependent helicase 3347:6646 forward MW:127070	Regular	1179013	3.17	1272970924	36	16	94	9.74	152851	93554	8634	0	17	Pass2	InSource	Phosphoryl STY(2)	6092643	NSTLL	NSTLLSDEER	584	5	6.13	2682	1	1	0	0	87618	0.0000		92	0.0	b2b5	190476	510	771743685868323	114348737173665	0.0175	Yellow	8162	6092640	6092652	229713	2674	2674.00	1.00	1	6092640
NCDO2118_RS00015	ATP-dependent helicase 3347:6646 forward MW:127070	Regular	1244092	3.86	1272970924	38	16	94	6.28	72952	10063	13496	1	1	Pass1	PepFrag1	None	16277962	SELGNFSVDDIYLR	SELGNFSVDDIYLR	878	14	3.70	2942	9	9	3	1	78473320	59896		977	2.4	b2b3b6b9y3y6y7y10y11y14	327055	1482	157153878346384	117153878346384	0.0500	Green	14250	16277968	16277967	318333	3651	3651.00	2.00	2	8144021
NCDO2118_RS00015	ATP-dependent helicase 3347:6646 forward MW:127070	Regular	1244092	3.86	1272970924	38	16	94	6.28	72952	10063	13496	0	2	Pass1	PepFrag1	None	11585790	LYASVSSFER	LYASVSSFER	752	10	7.00	2944	4	4	1	1	12364430	51870		830	2.1	b2b4b4y8y9	209648	1048	124738491959315	847384919593145	0.0479	Yellow	5279	11585727	11585748	215311	3498	3498.00	2.00	2	5797900
NCDO2118_RS00015	ATP-dependent helicase 3347:6646 forward MW:127070	Regular	1244092	3.86	1272970924	38	16	94	6.28	72952	10063	13496	0	3	Pass1	PepFrag1	None	14657474	IVGNFFHEVFEK	IVGNFFHEVFEK	789	12	5.30	2941	3	3	1	0	1415884	42459		1491	2.1	b3y6y7y11*	302566	1354	147969455979385	107969455979385	0.0399	Red	7966	14657386	14657395	246081	2914	2914.00	2.00	2	7333730
NCDO2118_RS00015	ATP-dependent helicase 3347:6646 forward MW:127070	Regular	1244092	3.86	1272970924	38	16	94	6.28	72952	10063	13496	0	4	Pass1	PepFrag1	None	13277515	SGQIAINPIMKR	SGQIAINPIMKR	1031	12	11.49	2940	2	2	0	0	1877511	43684	Identified	486	1.4	b7*b10y12	186857	1267	141561137633036	101561137633036	0.0127	Red	1900	13277508	13277524	164022	928	928.00	2.00	2	6643791
NCDO2118_RS00015	ATP-dependent helicase 3347:6646 forward MW:127070	Regular	1244092	3.86	1272970924	38	16	94	6.28	72952	10063	13496	0	5	Pass2	PepFrag2	None	11016150	SQAEILAELK	SQAEILAELK	1083	10	4.26	2954	0	0	0	0	1436703	42522		234	3.2	b4*b5*y9*	243891	1046	124579741067786	845797410677863	0.1525	Red	8005	11016304	11016327	246487	11125	11125.00	2.00	2	5513188
NCDO2118_RS00015	ATP-dependent helicase 3347:6646 forward MW:127070	Regular	1244092	3.86	1272970924	38	16	94	6.28	72952	10063	13496	0	6	Pass2	PepFrag2	None	11635539	NSTLLSDEER	NSTLLSDEER	584	10	3.83	2943	1	1	0	0	1239573	41881		140	2.4	b4*y8	203400	1040	124102880085705	841028800857052	0.0747	Red	4215	11635504	11635526	201630	5451	5451.00	2.00	2	5822789
NCDO2118_RS00015	ATP-dependent helicase 3347:6646 forward MW:127070	Regular	1244092	3.86	1272970924	38	16	94	6.28	72952	10063	13496	0	7	Pass2	PepFrag2	None	12927096	TLLTESSFGLPK	TLLTESSFGLPK	866	12	7.00	2952	5	5	1	1	2344665	44649	Missing	1602	2.1	b2b6y5y6y6y12	275975	1221	138113694761229	236227389522458	0.0404	Red	13527	12926586	12926573	309176	2944	2944.00	1.41	1	12926586
NCDO2118_RS00015	ATP-dependent helicase 3347:6646 forward MW:127070	Regular	1244092	3.86	1272970924	38	16	94	6.28	72952	10063	13496	0	8	Pass2	PepFrag2	None	19698563	LANDYANYSEFGDFTSR	LANDYANYSEFGDFTSR	158	17	3.70	2953	0	0	0	0	2058296	44084		31	1.7	y9	263508	1728	174096	134096	0.0167	Red	18792	19699201	19699172	433610	1217	1217.00	2.00	2	9854637
NCDO2118_RS00015	ATP-dependent helicase 3347:6646 forward MW:127070	Regular	1244092	3.86	1272970924	38	16	94	6.28	72952	10063	13496	0	9	Pass2	PepFrag2	None	12826314	LADGEFDFQLK	LADGEFDFQLK	175	11	3.70	2955	1	1	0	0	1416008	42459		547	1.3	b5y8y8*	283619	1173	134469867085327	944698670853269	0.0108	Red	8944	12826761	12826778	255105	786	786.00	2.00	2	6418417
NCDO2118_RS00015	ATP-dependent helicase 3347:6646 forward MW:127070	Regular	1244092	3.86	1272970924	38	16	94	6.28	72952	10063	13496	0	10	Pass2	MissedCleavage	None	15008016	SQAEILAELKGEGR	SQAEILAELKGEGR	1083	14	4.56	2948	1	1	0	0	1655973	43139		38	1.6	y12	211030	1399	151230055145575	111230055145575	0.0165	Red	6193	15007949	15007956	225913	1202	1202.00	2.00	2	7509011
NCDO2118_RS00015	ATP-dependent helicase 3347:6646 forward MW:127070	Regular	1244092	3.86	1272970924	38	16	94	6.28	72952	10063	13496	0	11	Pass2	MissedCleavage	None	18429596	IWEAENQKVEIEGVAK	IWEAENQKVEIEGVAK	296	16	4.26	2946	2	2	0	0	1129762	41478		86	1.6	b3b5	235856	1719	173490974042038	756606493613589	0.0156	Red	3894	18429364	18429387	197397	1141	1141.00	3.00	3	6149837
NCDO2118_RS00015	ATP-dependent helicase 3347:6646 forward MW:127070	Regular	1244092	3.86	1272970924	38	16	94	6.28	72952	10063	13496	0	12	Pass2	MissedCleavage	None	17969575	ATTKTELGTAGLSMLFR	ATTKTELGTAGLSMLFR	78	17	10.12	2945	2	2	0	0	2333341	44628		638	1.5	b5b14b15y17	269107	1698	172075124111276	132075124111276	0.0117	Red	12541	17969353	17969340	297029	853	853.00	2.00	2	8989713
NCDO2118_RS00015	ATP-dependent helicase 3347:6646 forward MW:127070	Regular	1244092	3.86	1272970924	38	16	94	6.28	72952	10063	13496	0	13	Pass2	MissedCleavage	None	24012034	FTEAFNESEFSKIELVNQLR	FTEAFNESEFSKIELVNQLR	421	20	4.26	2947	2	2	0	0	3899711	46859		121	1.6	b8b11b13	343339	2213	205311799814618	968745332097454	0.0109	Red	15611	24012068	24012060	338226	797	797.00	3.00	3	8010738
NCDO2118_RS00015	ATP-dependent helicase 3347:6646 forward MW:127070	Regular	1244092	3.86	1272970924	38	16	94	6.28	72952	10063	13496	0	14	Pass2	VarMod	Phosphoryl STY(11);Phosphoryl STY(15)	25172500	ILLDLAKDIDTVNLSKETLDK	ILLDLAKDIDTVNLSKETLDK	726	21	4.12	2950	4	4	0	1	16435000	53106		6102	6.2	b12b21y9y9y10*y11*y13y14*y16-H3PO4y21	313100	2273	209006242693931	993374951292875	0.4646	Yellow	14793	25172544	25172528	326369	33891	33891.00	2.69	3	8397563
NCDO2118_RS00015	ATP-dependent helicase 3347:6646 forward MW:127070	Regular	1244092	3.86	1272970924	38	16	94	6.28	72952	10063	13496	0	15	Pass2	VarMod	Oxidation M(18);Phosphoryl STY(8)	28083565	EEIPLYFSLQDSAGFLEMLIQLR	EEIPLYFSLQDSAGFLEMLIQLR	103	23	3.69	2949	1	1	0	0	839168	40187	Missing	96	2.1	y7y12*b13-H3PO4	499365	2548	225541215503716	11036081033581	0.0211	Red	18906	28083804	28083764	441949	1538	1538.00	3.00	3	9367983
NCDO2118_RS00015	ATP-dependent helicase 3347:6646 forward MW:127070	Regular	1244092	3.86	1272970924	38	16	94	6.28	72952	10063	13496	0	16	Pass2	VarMod	Phosphoryl STY(4)	12336027	QKISQGAFFK	QKISQGAFFK	315	10	10.60	2951	1	1	0	0	1070518	41244		77	1.3	b5b8	185071	1080	127264948037977	872649480379768	0.0139	Red	9175	12336090	12336109	256936	1016	1016.00	2.00	2	6173081
NCDO2118_RS00020	ATP-dependent helicase 6639:10250 forward MW:138860	Regular	177796	1.42	1389161909	6	6	119	1.58	13110	2619	647	1	1	Pass1	PepFrag1	None	13837155	GEVLTFTNDIFK	GEVLTFTNDIFK	472	12	4.07	814	1	1	0	0	2443928	36380		76	1.3	b5y7*	332192	1288	143121059598814	103121059598814	0.0670	Red	6007	13837258	13837261	324395	878	878.00	2.00	2	6923665
NCDO2118_RS00020	ATP-dependent helicase 6639:10250 forward MW:138860	Regular	177796	1.42	1389161909	6	6	119	1.58	13110	2619	647	0	2	Pass1	PepFrag1	None	7163937	GAAQEIK	GAAQEIK	547	7	7.00	815	3	3	1	0	16721790	44732		178	1.1	b7y3y4y7*	66864	664	920177663848186	144035532769637	0.0662	Red	913	7163910	7163927	93389	868	868.00	1.00	1	7163910
NCDO2118_RS00020	ATP-dependent helicase 6639:10250 forward MW:138860	Regular	177796	1.42	1389161909	6	6	119	1.58	13110	2619	647	0	3	Pass2	PepFrag2	None	12786875	TVKEAPFSMLR	TVKEAPFSMLR	1104	11	10.12	817	1	1	0	0	4730493	39248	Identified	214	2.7	y6	240207	1203	136752954877654	967529548776535	0.4777	Red	5759	12786846	12786853	304720	6262	6262.00	2.00	2	6398459
NCDO2118_RS00020	ATP-dependent helicase 6639:10250 forward MW:138860	Regular	177796	1.42	1389161909	6	6	119	1.58	13110	2619	647	0	4	Pass2	PepFrag2	None	9064349	AALSEEMR	AALSEEMR	856	8	4.26	819	0	0	0	0	1302984	33649		76	1.7	b7	141841	821	106003874422626	660038744226262	0.1835	Red	1624	9063965	9063983	115639	2406	2406.00	1.63	2	4537019
NCDO2118_RS00020	ATP-dependent helicase 6639:10250 forward MW:138860	Regular	177796	1.42	1389161909	6	6	119	1.58	13110	2619	647	0	5	Pass2	PepFrag2	None	15537330	SELDLYDNASLEGK	SELDLYDNASLEGK	889	14	3.59	816	1	1	0	0	360708	28071		68	1.9	b6b14*	268214	1405	151662141384316	111662141384316	0.1405	Red	3126	15537162	15537156	155705	1842	1842.00	2.26	2	7773618
NCDO2118_RS00020	ATP-dependent helicase 6639:10250 forward MW:138860	Regular	177796	1.42	1389161909	6	6	119	1.58	13110	2619	647	0	6	Pass2	MissedCleavage	None	21361124	FASATENPIKWLENQFLK	FASATENPIKWLENQFLK	188	18	7.08	818	0	0	0	0	2363449	36235	Missing	35	1.5	b10	358505	1989	191212445661097	151212445661097	0.0651	Red	7359	21360978	21360924	399116	854	854.00	2.00	2	10685525
NCDO2118_RS00020	ATP-dependent helicase 6639:10250 forward MW:138860	Regular	2667628	1.44	1389161909	39	20	119	7.73	102418	20234	16083	1	1	Pass1	PepFrag1	Carbamidomethyl C(3)	8954343	GICDGFVK	GICDGFVK	1127	8	6.10	2233	1	1	0	0	790444	43240		1155	2.7	y7y8	185099	772	101742991090212	617429910902122	0.0844	Red	2081	8954290	8954316	168568	8646	8646.00	1.77	2	4482181
NCDO2118_RS00020	ATP-dependent helicase 6639:10250 forward MW:138860	Regular	2667628	1.44	1389161909	39	20	119	7.73	102418	20234	16083	0	2	Pass1	PepFrag1	None	4703337	LPIK	LPIK	928	4	10.10	2232	4	4	2	1	112422700	64770	Identified	1167	0.0	b2y2y3y4	113606	473	73395099123788	106790198247576	0.0605	Green	3223	4703319	4703335	188842	6200	6200.00	1.00	1	4703319
NCDO2118_RS00020	ATP-dependent helicase 6639:10250 forward MW:138860	Regular	2667628	1.44	1389161909	39	20	119	7.73	102418	20234	16083	0	3	Pass1	PepFrag1	None	9005149	ANLILDNK	ANLILDNK	254	8	6.78	2230	3	3	0	1	3461253	49654		1127	2.2	b3y5y6y8	204122	857	109080431890802	690804318908022	0.0526	Red	1383	9005190	9005216	147797	5388	5388.00	1.79	2	4507631
NCDO2118_RS00020	ATP-dependent helicase 6639:10250 forward MW:138860	Regular	2667628	1.44	1389161909	39	20	119	7.73	102418	20234	16083	0	4	Pass1	PepFrag1	None	11026143	LADPGLFLEK	LADPGLFLEK	439	10	4.07	2229	4	4	2	0	38108530	60071	Identified	588	1.6	y3y7y8y9	277671	1047	124659129148931	846591291489308	0.0173	Green	11044	11026083	11026106	277345	1775	1775.00	2.00	2	5518078
NCDO2118_RS00020	ATP-dependent helicase 6639:10250 forward MW:138860	Regular	2667628	1.44	1389161909	39	20	119	7.73	102418	20234	16083	0	5	Pass1	PepFrag1	None	24492504	FNDRDLKEDVILSRENGLGMK	FNDRDLKEDVILSRENGLGMK	799	21	4.65	2231	0	0	0	0	1964152	47193		32	1.8	y11*	244398	2278	20931263614031	995417574268731	0.0112	Red	16494	24492459	24492448	356377	1142	1142.00	2.63	3	8170868
NCDO2118_RS00020	ATP-dependent helicase 6639:10250 forward MW:138860	Regular	2667628	1.44	1389161909	39	20	119	7.73	102418	20234	16083	0	6	Pass1	PepFrag1	None	9565451	LFISTFTK	LFISTFTK	51	8	10.10	2228	2	2	0	0	6006759	52048		467	1.2	y5y7	246784	912	113698881681754	73698881681754	0.0097	Yellow	3752	9565407	9565433	195918	989	989.00	2.00	2	4787740
NCDO2118_RS00020	ATP-dependent helicase 6639:10250 forward MW:138860	Regular	2667628	1.44	1389161909	39	20	119	7.73	102418	20234	16083	0	7	Pass2	PepFrag2	None	8885037	DEILSALK	DEILSALK	294	8	4.07	2242	3	3	0	0	6192396	52180		884	1.8	b8y4y8	241708	847	108230228267445	17646045653489	0.0278	Yellow	4510	8885162	8885173	205965	2852	2852.00	1.00	1	8885162
NCDO2118_RS00020	ATP-dependent helicase 6639:10250 forward MW:138860	Regular	2667628	1.44	1389161909	39	20	119	7.73	102418	20234	16083	0	8	Pass2	PepFrag2	None	5182933	ETLR	ETLR	390	4	7.00	2247	2	2	0	0	924028	43918		391	0.0	b3y4	81969	474	734985089361023	106997017872205	0.0228	Red	1464	5182918	5182935	150989	2331	2331.00	1.00	1	5182918
NCDO2118_RS00020	ATP-dependent helicase 6639:10250 forward MW:138860	Regular	2667628	1.44	1389161909	39	20	119	7.73	102418	20234	16083	0	9	Pass2	PepFrag2	None	12595799	METFPYMVNK	METFPYMVNK	841	10	6.89	2246	0	0	0	0	757270	43054	Missing	33	1.7	y3*	229983	1152	13286011384771	928601138477099	0.0185	Red	11073	12595769	12595787	277866	1898	1898.00	2.00	2	6302921
NCDO2118_RS00020	ATP-dependent helicase 6639:10250 forward MW:138860	Regular	2667628	1.44	1389161909	39	20	119	7.73	102418	20234	16083	0	10	Pass2	PepFrag2	None	13116249	DQMNLYSEALK	DQMNLYSEALK	1164	11	4.07	2235	1	1	0	0	996992	44248		57	1.7	y10	242375	1198	136373769893458	963737698934584	0.0185	Red	13761	13116113	13116129	311830	1897	1897.00	2.00	2	6563093
NCDO2118_RS00020	ATP-dependent helicase 6639:10250 forward MW:138860	Regular	2667628	1.44	1389161909	39	20	119	7.73	102418	20234	16083	0	11	Pass2	PepFrag2	None	14847591	FTSSSTISEIKER	FTSSSTISEIKER	1149	13	7.11	2234	2	2	0	0	1750588	46693		482	1.6	b13y9y13	168848	1362	148551727279675	108551727279675	0.0126	Red	1942	14847719	14847727	165805	1290	1290.00	2.00	2	7428896
NCDO2118_RS00020	ATP-dependent helicase 6639:10250 forward MW:138860	Regular	2667628	1.44	1389161909	39	20	119	7.73	102418	20234	16083	0	12	Pass2	PepFrag2	None	7383570	FTEWR	FTEWR	685	5	7.00	2245	2	2	0	0	1347371	45556		298	1.1	y3y5	173521	648	905335683145111	141067136629022	0.0114	Red	8915	7383709	7383724	254681	1166	1166.00	1.00	1	7383709
NCDO2118_RS00020	ATP-dependent helicase 6639:10250 forward MW:138860	Regular	2667628	1.44	1389161909	39	20	119	7.73	102418	20234	16083	0	13	Pass2	PepFrag2	None	29104077	LGEMTYGKEEALVQGNITDYPVEPEK	LGEMTYGKEEALVQGNITDYPVEPEK	490	26	3.89	2244	1	1	0	0	1459823	45904	Missing	387	1.9	b14y8	291984	2681	233322977626564	115548651751043	0.0105	Red	13607	29104829	29104779	310041	1078	1078.00	3.00	3	9708325
NCDO2118_RS00020	ATP-dependent helicase 6639:10250 forward MW:138860	Regular	2667628	1.44	1389161909	39	20	119	7.73	102418	20234	16083	0	14	Pass2	PepFrag2	None	9745054	VNIDPNFR	VNIDPNFR	118	8	7.00	2243	2	2	1	0	1718439	46613	Missing	144	1.1	y5y6	182924	885	111443603897829	714436038978286	0.0077	Red	1614	9745256	9745282	157320	788	788.00	2.00	2	4877664
NCDO2118_RS00020	ATP-dependent helicase 6639:10250 forward MW:138860	Regular	2667628	1.44	1389161909	39	20	119	7.73	102418	20234	16083	0	15	Pass2	MissedCleavage	None	16517818	HLMDEKLGEMTYGK	HLMDEKLGEMTYGK	484	14	5.35	2238	3	3	0	0	3260734	49394		1917	4.1	y2y6y7y14	214815	1523	160039150121636	666927667477575	0.1539	Red	3408	16517649	16517678	191258	15766	15766.00	2.85	3	5512598
NCDO2118_RS00020	ATP-dependent helicase 6639:10250 forward MW:138860	Regular	2667628	1.44	1389161909	39	20	119	7.73	102418	20234	16083	0	16	Pass2	MissedCleavage	None	30934800	KNENSFEYSDIAHFAIEILEENPDIR	KNENSFEYSDIAHFAIEILEENPDIR	364	26	4.01	2237	3	3	0	0	10036180	54277	Missing	2563	3.7	b6b17*b26y10*y18*y26	378961	2817	241148296772067	120765531181378	0.0657	Yellow	17145	30934989	30934920	372480	6728	6728.00	2.73	3	10318378
NCDO2118_RS00020	ATP-dependent helicase 6639:10250 forward MW:138860	Regular	2667628	1.44	1389161909	39	20	119	7.73	102418	20234	16083	0	17	Pass2	MissedCleavage	None	11436368	DKANLILDNK	DKANLILDNK	252	10	6.89	2236	0	0	0	0	2594191	48401		109	1.7	y4	184105	1083	127500514892981	875005148929811	0.0194	Red	4513	11436324	11436346	205991	1991	1991.00	2.00	2	5723198
NCDO2118_RS00020	ATP-dependent helicase 6639:10250 forward MW:138860	Regular	2667628	1.44	1389161909	39	20	119	7.73	102418	20234	16083	0	18	Pass2	MissedCleavage	None	10836408	KLIEAGVEPK	KLIEAGVEPK	554	10	7.08	2239	2	2	0	0	2315523	47908	Missing	111	1.2	y3y5y7	167670	1046	124579741067786	845797410677863	0.0075	Red	3589	10836297	10836320	193985	773	773.00	2.00	2	5423185
NCDO2118_RS00020	ATP-dependent helicase 6639:10250 forward MW:138860	Regular	2667628	1.44	1389161909	39	20	119	7.73	102418	20234	16083	0	19	Pass2	VarMod	Phosphoryl STY(4)	20520201	VVYTIYRFASATENPIK	VVYTIYRFASATENPIK	181	17	9.52	2241	3	3	0	0	3645973	49879	Identified	4028	6.0	b9b10b14-H3PO4b17y6y17	264871	1846	181934096618355	141934096618355	0.3666	Red	17295	20520348	20520311	374877	37543	37543.00	2.52	2	10265210
NCDO2118_RS00020	ATP-dependent helicase 6639:10250 forward MW:138860	Regular	2667628	1.44	1389161909	39	20	119	7.73	102418	20234	16083	0	20	Pass2	VarMod	Oxidation M(4)	13377246	TFVMAQRIVEK	TFVMAQRIVEK	31	11	10.12	2240	1	1	0	0	2489915	48223		143	1.8	b4b8*b9*	212787	1259	140964618696931	100964618696931	0.0213	Red	17623	13377205	13377220	382592	2177	2177.00	2.00	2	6693639
NCDO2118_RS00020	ATP-dependent helicase 6639:10250 forward MW:138860	Regular	350136	1.98	1389161909	19	13	119	5.49	168833	51355	16476	1	1	Pass1	PepFrag1	None	12595799	METFPYMVNK	METFPYMVNK	841	10	6.89	1177	5	5	2	2	5737657	43030	Missing	3107	4.8	b7b8b9*y2y3y10	254857	1152	13286011384771	928601138477099	0.2018	Red	3228	12595733	12595741	148042	34066	34066.00	2.00	2	6302903
NCDO2118_RS00020	ATP-dependent helicase 6639:10250 forward MW:138860	Regular	350136	1.98	1389161909	19	13	119	5.49	168833	51355	16476	0	2	Pass1	PepFrag1	None	24492504	FNDRDLKEDVILSRENGLGMK	FNDRDLKEDVILSRENGLGMK	799	21	4.65	1176	1	1	0	0	3197863	40491		1129	4.2	y9*y21	287344	2278	20931263614031	995417574268731	0.0687	Red	7163	24492437	24492388	339585	11591	11591.00	2.70	3	8170861
NCDO2118_RS00020	ATP-dependent helicase 6639:10250 forward MW:138860	Regular	350136	1.98	1389161909	19	13	119	5.49	168833	51355	16476	0	3	Pass1	PepFrag1	None	12786875	TVKEAPFSMLR	TVKEAPFSMLR	1104	11	10.12	1174	1	1	0	0	2084105	38632	Identified	284	2.6	y6y8	234266	1203	136752954877654	967529548776535	0.0337	Red	6599	12786807	12786814	302993	5698	5698.00	2.00	2	6398440
NCDO2118_RS00020	ATP-dependent helicase 6639:10250 forward MW:138860	Regular	350136	1.98	1389161909	19	13	119	5.49	168833	51355	16476	0	4	Pass1	PepFrag1	None	16396566	ENTSDEETDESEVR	ENTSDEETDESEVR	526	14	3.38	1173	4	4	1	0	10857880	45800		230	1.6	b14y7y8y11	121105	1408	15187795379748	11187795379748	0.0068	Red	1785	16396623	16396612	115405	1155	1155.00	2.00	2	8203348
NCDO2118_RS00020	ATP-dependent helicase 6639:10250 forward MW:138860	Regular	350136	1.98	1389161909	19	13	119	5.49	168833	51355	16476	0	5	Pass1	PepFrag1	None	7464043	QDLVGSK	QDLVGSK	309	7	6.78	1175	1	1	0	0	514511	32556		265	1.2	b3*y7	111129	690	944044271688475	148808854337695	0.0063	Red	4227	7463966	7463978	170262	1067	1067.00	1.00	1	7463966
NCDO2118_RS00020	ATP-dependent helicase 6639:10250 forward MW:138860	Regular	350136	1.98	1389161909	19	13	119	5.49	168833	51355	16476	0	6	Pass1	PepFrag1	None	16157859	METFPYMVNKDLK	METFPYMVNKDLK	841	13	6.95	1178	0	0	0	0	2851810	39994	Identified	48	1.3	y9	283142	1502	15856460717578	11856460717578	0.0046	Red	8789	16157822	16157812	433572	782	782.00	2.00	2	8083947
NCDO2118_RS00020	ATP-dependent helicase 6639:10250 forward MW:138860	Regular	350136	1.98	1389161909	19	13	119	5.49	168833	51355	16476	0	7	Pass2	PepFrag2	None	13396892	LEFTSQPDFKK	LEFTSQPDFKK	945	11	7.00	1179	1	1	0	0	533855	32717	Missing	41	2.4	b10	196488	1234	139092295327162	990922953271618	0.0270	Red	6487	13396899	13396904	295187	4551	4551.00	2.00	2	6703486
NCDO2118_RS00020	ATP-dependent helicase 6639:10250 forward MW:138860	Regular	350136	1.98	1389161909	19	13	119	5.49	168833	51355	16476	0	8	Pass2	PepFrag2	None	9064349	AALSEEMR	AALSEEMR	856	8	4.26	1183	0	0	0	0	1318092	36642		380	1.9	b4b7	136578	821	106003874422626	660038744226262	0.0195	Red	1699	9063957	9063974	113906	3285	3285.00	1.55	2	4537015
NCDO2118_RS00020	ATP-dependent helicase 6639:10250 forward MW:138860	Regular	350136	1.98	1389161909	19	13	119	5.49	168833	51355	16476	0	9	Pass2	PepFrag2	None	15247329	SPLFGFNEDELTR	SPLFGFNEDELTR	629	13	3.83	1182	1	1	0	0	2793664	39904	Missing	67	1.6	y10	330943	1375	149495492972192	109495492972192	0.0072	Red	6787	15247761	15247757	315923	1208	1208.00	2.00	2	7628917
NCDO2118_RS00020	ATP-dependent helicase 6639:10250 forward MW:138860	Regular	350136	1.98	1389161909	19	13	119	5.49	168833	51355	16476	0	10	Pass2	PepFrag2	None	20039960	DFATFTELFLSIDTDIR	DFATFTELFLSIDTDIR	272	17	3.50	1184	1	1	0	0	1266368	36468		31	1.7	b9	458542	1850	182196817392519	142196817392519	0.0071	Red	9654	20039584	20039545	508864	1202	1202.00	2.00	2	10024828
NCDO2118_RS00020	ATP-dependent helicase 6639:10250 forward MW:138860	Regular	350136	1.98	1389161909	19	13	119	5.49	168833	51355	16476	0	11	Pass2	PepFrag2	None	10254938	LDFSDFGPK	LDFSDFGPK	1027	9	3.88	1185	0	0	0	0	756533	34231	Missing	49	1.2	b3	224949	922	114528502330847	745285023308471	0.0048	Red	1792	10254504	10254518	115942	810	810.00	2.00	2	5132288
NCDO2118_RS00020	ATP-dependent helicase 6639:10250 forward MW:138860	Regular	350136	1.98	1389161909	19	13	119	5.49	168833	51355	16476	0	12	Pass2	MissedCleavage	None	20399808	EELEAEKLEFTSQPDFK	EELEAEKLEFTSQPDFK	938	17	3.89	1180	1	1	0	0	1281293	36519	Missing	148	1.5	y9y17	300319	1861	18291832518074	81945550120493	0.0050	Red	8100	20400107	20400078	393203	842	842.00	2.59	3	6806751
NCDO2118_RS00020	ATP-dependent helicase 6639:10250 forward MW:138860	Regular	350136	1.98	1389161909	19	13	119	5.49	168833	51355	16476	0	13	Pass2	VarMod	Phosphoryl STY(*)	16457145	AESYESSGYKGLFK	AESYESSGYKGLFK	734	14	7.00	1181	3	3	0	0	1746904	37865		10697	8.1	b10b13b14y14	208649	1411	152093612989064	112093612989064	0.6076	Red	4863	16457035	16457023	196475	102576	102576.00	2.00	2	8233554
NCDO2118_RS00020	ATP-dependent helicase 6639:10250 forward MW:138860	Regular	1680589	3.84	1389161909	41	23	119	7.65	154821	25762	16316	1	1	Pass1	PepFrag1	None	13837155	GEVLTFTNDIFK	GEVLTFTNDIFK	472	12	4.07	3842	4	4	0	0	16935360	54543		512	3.6	b8y7y8*y9y12	326944	1288	143121059598814	103121059598814	0.0857	Yellow	20679	13837035	13837040	340962	13270	13270.00	1.85	2	6923554
NCDO2118_RS00020	ATP-dependent helicase 6639:10250 forward MW:138860	Regular	1680589	3.84	1389161909	41	23	119	7.65	154821	25762	16316	0	2	Pass1	PepFrag1	None	11026143	LADPGLFLEK	LADPGLFLEK	439	10	4.07	3836	7	7	4	2	140276500	63724	Identified	2845	2.8	b2b3y3y6y7y8y9y9	280364	1047	124659129148931	846591291489308	0.0521	Green	14072	11026130	11026144	277655	8063	8063.00	2.00	2	5518101
NCDO2118_RS00020	ATP-dependent helicase 6639:10250 forward MW:138860	Regular	1680589	3.84	1389161909	41	23	119	7.65	154821	25762	16316	0	3	Pass1	PepFrag1	None	10846401	LFISTFTKK	LFISTFTKK	51	9	10.60	3838	2	2	0	0	3487424	47680		416	2.2	b7y6y8	200888	1047	124659129148931	846591291489308	0.0286	Red	9290	10846319	10846334	238339	4429	4429.00	2.00	2	5428196
NCDO2118_RS00020	ATP-dependent helicase 6639:10250 forward MW:138860	Regular	1680589	3.84	1389161909	41	23	119	7.65	154821	25762	16316	0	4	Pass1	PepFrag1	None	6463519	AASELR	AASELR	60	6	7.00	3839	3	3	0	1	2104671	45486		1584	1.7	b4y2y6	88904	588	848550808472105	129710161694421	0.0223	Red	2031	6463528	6463540	163217	3452	3452.00	1.00	1	6463528
NCDO2118_RS00020	ATP-dependent helicase 6639:10250 forward MW:138860	Regular	1680589	3.84	1389161909	41	23	119	7.65	154821	25762	16316	0	5	Pass1	PepFrag1	None	20310402	MLELLSNGHNLFMVGDIK	MLELLSNGHNLFMVGDIK	414	18	5.22	3837	2	2	0	0	3098434	47166		574	2.4	b8b10b14*y8y9	365685	1922	186893941458952	845959609726348	0.0176	Red	18251	20310369	20310389	315308	2724	2724.00	2.85	3	6776838
NCDO2118_RS00020	ATP-dependent helicase 6639:10250 forward MW:138860	Regular	1680589	3.84	1389161909	41	23	119	7.65	154821	25762	16316	0	6	Pass1	PepFrag1	None	12115943	LEFTSQPDFK	LEFTSQPDFK	945	10	4.07	3834	4	4	1	0	9141331	51865	Identified	933	1.8	b9*y4y6y7*y8y9y9*y9	231371	1099	128753219007985	887532190079853	0.0163	Red	7784	12115985	12115996	226159	2523	2523.00	2.00	2	6063029
NCDO2118_RS00020	ATP-dependent helicase 6639:10250 forward MW:138860	Regular	1680589	3.84	1389161909	41	23	119	7.65	154821	25762	16316	0	7	Pass1	PepFrag1	None	8524396	TFVMAQR	TFVMAQR	31	7	11.05	3833	1	1	0	0	280224	36730		85	1.2	y1y5*	158979	786	102969356396621	62969356396621	0.0079	Red	2705	8524454	8524472	174475	1229	1229.00	2.00	2	4267263
NCDO2118_RS00020	ATP-dependent helicase 6639:10250 forward MW:138860	Regular	1680589	3.84	1389161909	41	23	119	7.65	154821	25762	16316	0	8	Pass1	PepFrag1	None	7723658	HLMDEK	HLMDEK	484	6	5.22	3843	1	1	0	0	350607	37703		37	1.2	b5	139001	701	954051121015843	150810224203169	0.0074	Red	5806	7723694	7723705	208511	1149	1149.00	1.00	1	7723694
NCDO2118_RS00020	ATP-dependent helicase 6639:10250 forward MW:138860	Regular	1680589	3.84	1389161909	41	23	119	7.65	154821	25762	16316	0	9	Pass1	PepFrag1	None	16958337	YQNQAFEIAENLQK	YQNQAFEIAENLQK	337	14	4.26	3835	0	0	0	0	5377130	49560		79	1.5	b9*y6*	265361	1545	161576658851364	121576658851364	0.0061	Red	13205	16958428	16958416	270084	949	949.00	2.00	2	8484250
NCDO2118_RS00020	ATP-dependent helicase 6639:10250 forward MW:138860	Regular	1680589	3.84	1389161909	41	23	119	7.65	154821	25762	16316	0	10	Pass2	PepFrag2	None	8704468	QSIYGFR	QSIYGFR	432	7	9.84	3850	2	2	0	0	3007711	47037		7187	5.9	y4y7	173496	783	102707180900706	165414361801413	0.5701	Red	4992	8704745	8704755	200091	88261	88261.00	1.36	1	8704745
NCDO2118_RS00020	ATP-dependent helicase 6639:10250 forward MW:138860	Regular	1680589	3.84	1389161909	41	23	119	7.65	154821	25762	16316	0	11	Pass2	PepFrag2	None	9504764	EAPFSMLR	EAPFSMLR	1107	8	7.00	3854	1	1	0	0	986288	42195	Missing	81	2.3	y4	214143	870	110180769869336	180361539738671	0.0355	Red	1589	9504435	9504442	154179	5493	5493.00	1.37	1	9504435
NCDO2118_RS00020	ATP-dependent helicase 6639:10250 forward MW:138860	Regular	1680589	3.84	1389161909	41	23	119	7.65	154821	25762	16316	0	12	Pass2	PepFrag2	None	7784345	FEELIK	FEELIK	162	6	4.26	3855	0	0	0	0	215673	35593		36	1.7	b5	214180	736	98554889895041	157109779790082	0.0218	Red	9779	7784096	7784107	242313	3371	3371.00	1.00	1	7784096
NCDO2118_RS00020	ATP-dependent helicase 6639:10250 forward MW:138860	Regular	1680589	3.84	1389161909	41	23	119	7.65	154821	25762	16316	0	13	Pass2	PepFrag2	None	30383432	ETLREHYDEIMIDEYQDTSHTQER	ETLREHYDEIMIDEYQDTSHTQER	390	24	4.10	3841	2	2	0	0	862103	41610		92	2.6	b6y5	249652	2708	234886870080838	116591246720559	0.0169	Red	21138	30383177	30383088	347058	2616	2616.00	3.00	3	10134441
NCDO2118_RS00020	ATP-dependent helicase 6639:10250 forward MW:138860	Regular	1680589	3.84	1389161909	41	23	119	7.65	154821	25762	16316	0	14	Pass2	PepFrag2	None	10836269	QANLQALAVR	QANLQALAVR	724	10	11.05	3849	1	1	0	0	2431661	46114		137	1.7	b6*y3	203359	1026	122986622437457	82986622437457	0.0138	Red	4398	10836237	10836252	194181	2136	2136.00	2.00	2	5423155
NCDO2118_RS00020	ATP-dependent helicase 6639:10250 forward MW:138860	Regular	1680589	3.84	1389161909	41	23	119	7.65	154821	25762	16316	0	15	Pass2	PepFrag2	None	24492504	FNDRDLKEDVILSRENGLGMK	FNDRDLKEDVILSRENGLGMK	799	21	4.65	3844	0	0	0	0	1203457	43059		119	2.1	b7b18*	249684	2278	20931263614031	16931263614031	0.0107	Red	23620	24492358	24492277	384591	1658	1658.00	2.00	2	12251215
NCDO2118_RS00020	ATP-dependent helicase 6639:10250 forward MW:138860	Regular	1680589	3.84	1389161909	41	23	119	7.65	154821	25762	16316	0	16	Pass2	PepFrag2	None	8244625	HGQLIEK	HGQLIEK	330	7	7.82	3852	0	0	0	0	1170187	42937		42	1.3	b4*	167960	772	101742991090212	617429910902122	0.0087	Red	3649	8244946	8244964	186054	1348	1348.00	2.00	2	4127509
NCDO2118_RS00020	ATP-dependent helicase 6639:10250 forward MW:138860	Regular	1680589	3.84	1389161909	41	23	119	7.65	154821	25762	16316	0	17	Pass2	PepFrag2	None	12595799	METFPYMVNK	METFPYMVNK	841	10	6.89	3851	0	0	0	0	1190656	43012	Missing	112	1.4	y8*	223438	1152	13286011384771	928601138477099	0.0073	Red	7279	12595601	12595611	221852	1129	1129.00	2.00	2	6302837
NCDO2118_RS00020	ATP-dependent helicase 6639:10250 forward MW:138860	Regular	1680589	3.84	1389161909	41	23	119	7.65	154821	25762	16316	0	18	Pass2	PepFrag2	None	13116249	DQMNLYSEALK	DQMNLYSEALK	1164	11	4.07	3845	3	3	0	0	498447	39231		392	1.3	y2y5y7	240775	1198	136373769893458	963737698934584	0.0062	Red	18298	13116071	13116078	315542	958	958.00	2.00	2	6563072
NCDO2118_RS00020	ATP-dependent helicase 6639:10250 forward MW:138860	Regular	1680589	3.84	1389161909	41	23	119	7.65	154821	25762	16316	0	19	Pass2	PepFrag2	None	9005149	ANLILDNK	ANLILDNK	254	8	6.78	3840	2	2	0	0	1324719	43476		269	1.2	y5y8	200685	857	109080431890802	178160863781604	0.0061	Red	13756	9005259	9005267	274857	948	948.00	1.00	1	9005259
NCDO2118_RS00020	ATP-dependent helicase 6639:10250 forward MW:138860	Regular	1680589	3.84	1389161909	41	23	119	7.65	154821	25762	16316	0	20	Pass2	PepFrag2	None	9565451	LFISTFTK	LFISTFTK	51	8	10.10	3853	1	1	0	0	1064571	42526		31	1.2	b6	250612	912	113698881681754	73698881681754	0.0057	Red	11040	9565136	9565154	251255	890	890.00	2.00	2	4787605
NCDO2118_RS00020	ATP-dependent helicase 6639:10250 forward MW:138860	Regular	1680589	3.84	1389161909	41	23	119	7.65	154821	25762	16316	0	21	Pass2	MissedCleavage	None	18029112	WLENQFLKGFETYK	WLENQFLKGFETYK	198	14	14.00	3846	2	2	0	0	5642202	49769		391	2.8	b10*b14y4y12	307864	1661	169566239621622	129566239621622	0.0379	Red	17916	18028970	18028951	311676	5871	5871.00	2.00	2	9019521
NCDO2118_RS00020	ATP-dependent helicase 6639:10250 forward MW:138860	Regular	1680589	3.84	1389161909	41	23	119	7.65	154821	25762	16316	0	22	Pass2	MissedCleavage	None	30934800	KNENSFEYSDIAHFAIEILEENPDIR	KNENSFEYSDIAHFAIEILEENPDIR	364	26	4.01	3847	0	0	0	0	3429768	47607	Missing	79	2.2	b11b12	406773	2817	241148296772067	120765531181378	0.0099	Red	22876	30935074	30934978	373074	1532	1532.00	3.00	3	10318407
NCDO2118_RS00020	ATP-dependent helicase 6639:10250 forward MW:138860	Regular	1680589	3.84	1389161909	41	23	119	7.65	154821	25762	16316	0	23	Pass2	VarMod	Oxidation M(9)	12065895	QRAALSEEMR	QRAALSEEMR	854	10	7.14	3848	3	3	0	0	2810949	46743		283	1.2	b2b5b7b8y10	123596	1083	127500514892981	875005148929811	0.0053	Red	9874	12065871	12065883	243073	822	822.00	2.00	2	6037972
NCDO2118_RS00035	GTP-binding protein 11336:12451 forward MW:41242	Regular	11278230	0	412419609	33	4	37	8.63	86874	104490	36546	1	1	Pass1	PepFrag1	None	15636908	VEEEISELEDDEK	VEEEISELEDDEK	247	13	3.33	32	20	20	18	8	284279600	75060		20945	6.2	b2b3b3b4b4b5b5b6b7b7b8b9y2y3y4y5y5y6y6y7y8y8y9y10y10y11y11y12y12y13	203011	1397	151085889207092	111085889207092	0.6210	Green	3965	15636913	15636913	203011	53948	53948.00	2.01	2	7823493
NCDO2118_RS00035	GTP-binding protein 11336:12451 forward MW:41242	Regular	11278230	0	412419609	33	4	37	8.63	86874	104490	36546	0	2	Pass1	PepFrag1	None	12125267	TIDFDEDETK	TIDFDEDETK	184	10	3.43	31	8	8	3	3	46611360	67207		5503	3.6	b2b3b8y2y4y6y7y8y8	178234	1071	126556934911502	865569349115019	0.1809	Green	3570	12125267	12125267	178234	15712	15712.00	2.00	2	6067670
NCDO2118_RS00035	GTP-binding protein 11336:12451 forward MW:41242	Regular	11278230	0	412419609	33	4	37	8.63	86874	104490	36546	0	3	Pass2	PepFrag2	None	10074826	ESGVDMLTR	ESGVDMLTR	270	9	4.07	34	4	4	0	0	2497501	54497		9730	3.3	b9y3y7y9	151889	915	113948084834664	187896169669328	0.1586	Yellow	2804	10074550	10074550	151889	13781	13781.00	1.00	1	10074550
NCDO2118_RS00035	GTP-binding protein 11336:12451 forward MW:41242	Regular	11278230	0	412419609	33	4	37	8.63	86874	104490	36546	0	4	Pass2	MissedCleavage	None	18670211	KTVPTTFEFTDIAGIVK	KTVPTTFEFTDIAGIVK	61	17	7.00	33	1	1	0	0	785476	49474	Missing	368	2.5	b8b13	285287	1775	177238693138861	137238693138861	0.0395	Red	4790	18670275	18670275	285287	3433	3433.00	2.24	2	9340174
NCDO2118_RS00035	GTP-binding protein 11336:12451 forward MW:41242	Regular	13973190	0	412419609	20	5	37	10.78	40488	94275	12966	1	1	Pass1	PepFrag1	None	12556239	AVTMSYDDLLK	AVTMSYDDLLK	326	11	3.88	810	14	14	8	4	470869800	78182		11126	4.8	b2b3b3b5b6b11y1y3y4y5y6y7y7y8y9y9y10y11	251806	1168	134087469870706	940874698707061	0.7762	Green	8122	12556256	12556271	269947	31425	31425.00	1.98	2	6283164
NCDO2118_RS00035	GTP-binding protein 11336:12451 forward MW:41242	Regular	13973190	0	412419609	20	5	37	10.78	40488	94275	12966	0	2	Pass2	PepFrag2	None	11055888	DAVAEFNVLK	DAVAEFNVLK	161	10	4.07	814	0	0	0	0	448645	47972		31	1.4	b7	263782	1034	123625101174992	836251011749922	0.0313	Red	12491	11055680	11055701	350752	1266	1266.00	2.00	2	5532877
NCDO2118_RS00035	GTP-binding protein 11336:12451 forward MW:41242	Regular	13973190	0	412419609	20	5	37	10.78	40488	94275	12966	0	3	Pass2	VarMod	Phosphoryl STY(*)	28943794	ESGVDMLTRAAYHLLGLATYFTAGEK	ESGVDMLTRAAYHLLGLATYFTAGEK	270	26	5.35	813	0	0	0	0	1462763	53105		64	2.5	y8y10	344324	2616	229536344321096	113024229547398	0.0540	Yellow	13035	28943841	28943772	365038	2187	2187.00	3.00	3	9654662
NCDO2118_RS00035	GTP-binding protein 11336:12451 forward MW:41242	Regular	13973190	0	412419609	20	5	37	10.78	40488	94275	12966	0	4	Pass2	VarMod	Oxidation M(4)	12716188	AVTMSYDDLLK	AVTMSYDDLLK	326	11	3.88	812	3	3	1	0	6445470	59546		267	1.8	y2y8y9	251806	1168	134087469870706	940874698707061	0.0533	Green	8115	12716173	12716188	269810	2159	2159.00	2.00	2	6363123
NCDO2118_RS00035	GTP-binding protein 11336:12451 forward MW:41242	Regular	13973190	0	412419609	20	5	37	10.78	40488	94275	12966	0	5	Pass2	VarMod	Phosphoryl STY(3);Phosphoryl STY(10)	23700930	AAYHLLGLATYFTAGEKEVR	AAYHLLGLATYFTAGEKEVR	279	20	7.69	811	1	1	0	0	1744200	53869		581	2.1	y9y10y14y20	294671	2063	195926171780229	155926171780229	0.0417	Yellow	12330	23700944	23700852	346475	1688	1688.00	2.44	2	11855508
NCDO2118_RS00035	GTP-binding protein 11336:12451 forward MW:41242	Regular	13973190	0	412419609	20	5	37	10.78	40488	94275	12966	0	6	Pass2	InSource	None	10855183	TMSYDDLLK	AVTMSYDDLLK	328	9	3.88	810	2	2	0	0	13320420	0.0000		897	0.0	y7y9	251806	996	120577384683669	201154769367338	0.0435	Green	8116	10855225	10855231	269859	1763	1763.00	1.38	1	10855225
NCDO2118_RS00035	GTP-binding protein 11336:12451 forward MW:41242	Regular	55882800	0	412419609	102	13	37	38.54	409308	270936	134555	1	1	Pass1	PepFrag1	None	13097838	ALTAGIVGLPNVGK	ALTAGIVGLPNVGK	1	14	10.10	930	20	20	15	8	382728000	83302	Identified	46871	9.0	b2b3b3b4b4b5b5b6b6b7b7b8b9b9b11b11b12*b14b14y2y3y4y5*y6y7y8y9y10y11y12y12y13	263067	1274	142082062516004	102082062516004	0.3406	Green	10381	13097847	13097863	281478	139395	139395.00	1.96	2	6553960
NCDO2118_RS00035	GTP-binding protein 11336:12451 forward MW:41242	Regular	55882800	0	412419609	102	13	37	38.54	409308	270936	134555	0	2	Pass1	PepFrag1	None	17389262	TVPTTFEFTDIAGIVK	TVPTTFEFTDIAGIVK	62	16	4.07	932	19	19	13	5	451825100	84022	Identified	47464	8.1	b2b3b4b5b5b6b7b11b13b15y2y3y5y6y8y9y10y11y12y12y13y13y14y15y16	373495	1640	16813399523446	12813399523446	0.2246	Green	24976	17389341	17389337	361856	91951	91951.00	2.02	2	8699707
NCDO2118_RS00035	GTP-binding protein 11336:12451 forward MW:41242	Regular	55882800	0	412419609	102	13	37	38.54	409308	270936	134555	0	3	Pass1	PepFrag1	None	10906143	AEFLEAIGLK	AEFLEAIGLK	260	10	4.26	931	12	12	8	3	177114200	79955		9682	5.0	b2b3b4b5b8y3y4y5y7y8y9y9y10	317057	1042	124261935390167	842619353901674	0.0967	Green	15353	10906103	10906124	310605	39590	39590.00	1.89	2	5458088
NCDO2118_RS00035	GTP-binding protein 11336:12451 forward MW:41242	Regular	55882800	0	412419609	102	13	37	38.54	409308	270936	134555	0	4	Pass1	PepFrag1	None	9945568	STLFNAITK	STLFNAITK	15	9	10.10	928	7	7	2	1	112637600	77990		9185	4.4	b2b2b3b6*b8y2y3y4y6y7y8y9	235602	940	116014303376569	760143033765691	0.0758	Green	5365	9945524	9945546	243426	31015	31015.00	1.93	2	4977798
NCDO2118_RS00035	GTP-binding protein 11336:12451 forward MW:41242	Regular	55882800	0	412419609	102	13	37	38.54	409308	270936	134555	0	5	Pass1	PepFrag1	None	12556239	AVTMSYDDLLK	AVTMSYDDLLK	326	11	3.88	929	13	13	9	2	479209800	84278		7623	4.2	b2b3b3b11y1y2y3y4y5y6y7y8y9y11	269369	1168	134087469870706	940874698707061	0.0517	Green	8084	12556231	12556248	265988	21150	21150.00	1.97	2	6283152
NCDO2118_RS00035	GTP-binding protein 11336:12451 forward MW:41242	Regular	55882800	0	412419609	102	13	37	38.54	409308	270936	134555	0	6	Pass1	PepFrag1	None	14408243	MALTAGIVGLPNVGK	MALTAGIVGLPNVGK	0	15	10.10	933	2	2	0	0	2966094	62195	Identified	499	1.9	b5y1y5*y15	303332	1398	151157980769917	111157980769917	0.0045	Green	33043	14408148	14408159	428775	1860	1860.00	2.00	2	7209111
NCDO2118_RS00035	GTP-binding protein 11336:12451 forward MW:41242	Regular	55882800	0	412419609	102	13	37	38.54	409308	270936	134555	0	7	Pass2	PepFrag2	None	20790791	AEFLEAIGLKESGVDMLTR	AEFLEAIGLKESGVDMLTR	260	19	4.16	940	4	4	0	1	2339273	61164		538	1.7	b8b9b11y1y11	376208	1957	189156027452395	149156027452395	0.0027	Green	23378	20790648	20790619	353148	1113	1113.00	2.35	2	10400360
NCDO2118_RS00035	GTP-binding protein 11336:12451 forward MW:41242	Regular	55882800	0	412419609	102	13	37	38.54	409308	270936	134555	0	8	Pass2	MissedCleavage	None	17288989	GFIRAVTMSYDDLLK	GFIRAVTMSYDDLLK	322	15	6.84	936	4	4	0	0	6050891	65291		7828	6.7	b15y3y7y15	331389	1623	166970076986799	126970076986799	0.1416	Green	13724	17289200	17289196	301795	57960	57960.00	2.01	2	8649636
NCDO2118_RS00035	GTP-binding protein 11336:12451 forward MW:41242	Regular	55882800	0	412419609	102	13	37	38.54	409308	270936	134555	0	9	Pass2	MissedCleavage	None	20310480	APQMAGIIHTDFEKGFIR	APQMAGIIHTDFEKGFIR	308	18	7.82	935	0	0	0	0	1006884	57503	Missing	41	2.7	b10	325567	1894	185074371819657	83382914546438	0.0093	Yellow	8150	20310346	20310370	266573	3800	3800.00	3.00	3	6776831
NCDO2118_RS00035	GTP-binding protein 11336:12451 forward MW:41242	Regular	55882800	0	412419609	102	13	37	38.54	409308	270936	134555	0	10	Pass2	MissedCleavage	None	15527741	TIDFDEDETKVLK	TIDFDEDETKVLK	184	13	3.86	934	2	2	0	0	3978521	63470		808	1.5	b11y13	243124	1435	153813422202609	113813422202609	0.0026	Green	15116	15527732	15527738	309157	1066	1066.00	2.00	2	7768902
NCDO2118_RS00035	GTP-binding protein 11336:12451 forward MW:41242	Regular	55882800	0	412419609	102	13	37	38.54	409308	270936	134555	0	11	Pass2	VarMod	Phosphoryl STY(*)	19469874	KTVPTTFEFTDIAGIVK	KTVPTTFEFTDIAGIVK	61	17	7.00	939	4	4	1	1	2821811	61978	Missing	1042	3.2	b6b7b9b14y8y8y9	511832	1775	177238693138861	781591287592405	0.0159	Green	24867	19469997	19470024	361204	6491	6491.00	2.86	3	6496714
NCDO2118_RS00035	GTP-binding protein 11336:12451 forward MW:41242	Regular	55882800	0	412419609	102	13	37	38.54	409308	270936	134555	0	12	Pass2	VarMod	Phosphoryl STY(4)	24963295	MALTAGIVGLPNVGKSTLFNAITK	MALTAGIVGLPNVGKSTLFNAITK	0	24	10.60	938	0	0	0	0	1173304	58167	Missing	241	2.1	b19*y13*	374505	2338	212972063462397	172972063462397	0.0039	Yellow	22023	24963561	24963491	346056	1589	1589.00	2.00	2	12486817
NCDO2118_RS00035	GTP-binding protein 11336:12451 forward MW:41242	Regular	55882800	0	412419609	102	13	37	38.54	409308	270936	134555	0	13	Pass2	VarMod	Phosphoryl STY(26)	48022212	AFDDENVMRENNREDAFIDPMADIETINLELILADLESVNK	AFDDENVMRENNREDAFIDPMADIETINLELILADLESVNK	105	41	3.57	937	3	3	0	0	5126849	64571	Missing	530	2.5	b9b33*b35*y8*y9y10y14	452690	4355	322417352204074	889669408816297	0.0034	Green	19823	48022414	48022414	333865	1395	1395.00	5.00	5	9612541
NCDO2118_RS00035	GTP-binding protein 11336:12451 forward MW:41242	Regular	55882800	0	412419609	102	13	37	38.54	409308	270936	134555	0	14	Pass2	InSource	None	8064771	LFNAITK	STLFNAITK	17	7	10.10	928	4	4	1	0	4846863	0.0000		682	0.0	b3y2y3y7	235602	774	101918637223401	163837274446801	0.0139	Green	5372	8064770	8064788	243471	5678	5678.00	1.21	1	8064770
NCDO2118_RS00035	GTP-binding protein 11336:12451 forward MW:41242	Regular	55882800	0	412419609	102	13	37	38.54	409308	270936	134555	0	15	Pass2	InSource	None	6933930	FNAITK	STLFNAITK	18	6	10.10	928	5	5	2	1	40593420	0.0000		1164	0.0	b2b3b4y3y6	235602	650	907197556834765	141439511366953	0.0093	Green	5374	6933907	6933925	243495	3827	3827.00	1.00	1	6933907
NCDO2118_RS00035	GTP-binding protein 11336:12451 forward MW:41242	Regular	55882800	0	412419609	102	13	37	38.54	409308	270936	134555	0	16	Pass2	InSource	None	6844039	GLPNVGK	ALTAGIVGLPNVGK	8	7	10.10	930	3	3	0	0	21688710	0.0000	Identified	357	0.0	b4y1y5	263067	646	903471892958311	140694378591662	0.0035	Green	10379	6843994	6844013	281472	1428	1428.00	1.00	1	6843994
NCDO2118_RS00035	GTP-binding protein 11336:12451 forward MW:41242	Regular	21212430	0	412419609	33	3	37	8.63	126334	170967	52116	1	1	Pass1	PepFrag1	None	15636908	VEEEISELEDDEK	VEEEISELEDDEK	247	13	3.33	166	17	17	13	6	425819300	79558		30974	7.3	b2b3b3b4b4b5b5b6b8b9b13y4y5y5y6y7y7y8y8y9y10y10y11y11y12y12y13	226789	1397	151085889207092	111085889207092	0.6602	Green	4441	15636907	15636901	202783	83406	83406.00	2.01	2	7823490
NCDO2118_RS00035	GTP-binding protein 11336:12451 forward MW:41242	Regular	21212430	0	412419609	33	3	37	8.63	126334	170967	52116	0	2	Pass1	PepFrag1	None	12125267	TIDFDEDETK	TIDFDEDETK	184	10	3.43	165	11	11	8	2	230427500	76891		12971	4.6	b2b3b8b10y2y3y4y5y6y7y8y8y9	190308	1071	126556934911502	865569349115019	0.2420	Green	3907	12125237	12125247	178316	30572	30572.00	2.00	2	6067655
NCDO2118_RS00035	GTP-binding protein 11336:12451 forward MW:41242	Regular	21212430	0	412419609	33	3	37	8.63	126334	170967	52116	0	3	Pass2	PepFrag2	None	10074826	ESGVDMLTR	ESGVDMLTR	270	9	4.07	167	4	4	0	0	3320475	58478		7077	3.0	b9b9y3y7y9	155547	915	113948084834664	187896169669328	0.0851	Yellow	2971	10074562	10074557	151873	10752	10752.00	1.00	1	10074562
NCDO2118_RS00035	GTP-binding protein 11336:12451 forward MW:41242	Regular	21212430	0	412419609	33	3	37	8.63	126334	170967	52116	0	4	Pass2	InSource	None	9983949	DFDEDETK	TIDFDEDETK	186	8	3.43	165	1	1	0	0	1944407	0.0000		1094	0.0	y8	190308	854	108825719704185	177651439408369	0.0127	Green	3909	9984003	9983998	178350	1604	1604.00	1.00	1	9984003
NCDO2118_RS00035	GTP-binding protein 11336:12451 forward MW:41242	Regular	7897604	0	412419609	39	10	37	16.98	208880	71050	67732	1	1	Pass1	PepFrag1	None	10074826	ESGVDMLTR	ESGVDMLTR	270	9	4.07	1076	13	13	10	3	291125900	73616		49110	5.9	b2b2b3b3b4b4b5b9b9y1y2y3y4y5y5y6y7y8y8y9	173764	915	113948084834664	739480848346641	0.3276	Green	5441	10074724	10074749	187701	68437	68437.00	1.92	2	5042398
NCDO2118_RS00035	GTP-binding protein 11336:12451 forward MW:41242	Regular	7897604	0	412419609	39	10	37	16.98	208880	71050	67732	0	2	Pass1	PepFrag1	None	15586842	EYVGQDGDIMEFR	EYVGQDGDIMEFR	355	13	3.59	1077	3	3	0	0	9004103	58519		281	1.7	y4y7y10	269066	1387	15036402466178	11036402466178	0.0071	Green	11037	15586773	15586777	255050	1492	1492.00	2.00	2	7798423
NCDO2118_RS00035	GTP-binding protein 11336:12451 forward MW:41242	Regular	7897604	0	412419609	39	10	37	16.98	208880	71050	67732	0	3	Pass1	PepFrag1	None	16778442	EFAATENAEVAVISAR	EFAATENAEVAVISAR	231	16	3.96	1078	2	2	0	0	3825081	54801		115	1.6	y3y12	272331	1541	161297657411125	121297657411125	0.0054	Yellow	11128	16778580	16778576	256823	1121	1121.00	2.00	2	8394326
NCDO2118_RS00035	GTP-binding protein 11336:12451 forward MW:41242	Regular	7897604	0	412419609	39	10	37	16.98	208880	71050	67732	0	4	Pass1	PepFrag1	None	22710710	LREEGKEYVGQDGDIMEFR	LREEGKEYVGQDGDIMEFR	349	19	4.13	1080	1	1	0	0	1351128	50282		208	1.5	b11y10*	265009	2060	195736182746551	904907884977009	0.0037	Red	13844	22710685	22710677	317381	781	781.00	2.61	3	7576943
NCDO2118_RS00035	GTP-binding protein 11336:12451 forward MW:41242	Regular	7897604	0	412419609	39	10	37	16.98	208880	71050	67732	0	5	Pass1	PepFrag1	None	20018858	EEGKEYVGQDGDIMEFR	EEGKEYVGQDGDIMEFR	351	17	3.82	1079	1	1	0	0	1708493	51301		83	1.5	b7y4	262493	1788	178103031019338	787353540128918	0.0037	Yellow	11472	20018752	20018757	262540	769	769.00	3.00	3	6679632
NCDO2118_RS00035	GTP-binding protein 11336:12451 forward MW:41242	Regular	7897604	0	412419609	39	10	37	16.98	208880	71050	67732	0	6	Pass2	PepFrag2	None	10964728	AFDDENVMR	AFDDENVMR	105	9	3.70	1084	2	2	0	0	4027608	55025		1041	1.7	y7y9	191900	966	118143831644999	781438316449989	0.0107	Yellow	8450	10964383	10964407	221647	2228	2228.00	2.00	2	5487228
NCDO2118_RS00035	GTP-binding protein 11336:12451 forward MW:41242	Regular	7897604	0	412419609	39	10	37	16.98	208880	71050	67732	0	7	Pass2	PepFrag2	None	12125267	TIDFDEDETK	TIDFDEDETK	184	10	3.43	1083	2	2	0	0	3715799	54675		1336	1.4	b5b6b7y8y10	191368	1071	126556934911502	865569349115019	0.0055	Yellow	8675	12124796	12124816	224028	1144	1144.00	1.58	2	6067434
NCDO2118_RS00035	GTP-binding protein 11336:12451 forward MW:41242	Regular	7897604	0	412419609	39	10	37	16.98	208880	71050	67732	0	8	Pass2	PepFrag2	None	6523453	AWTFK	AWTFK	299	5	10.10	1085	1	1	0	0	700185	47427		48	1.0	y3	162703	593	853354395412723	130670879082545	0.0041	Red	5994	6523264	6523282	193932	850	850.00	1.00	1	6523264
NCDO2118_RS00035	GTP-binding protein 11336:12451 forward MW:41242	Regular	7897604	0	412419609	39	10	37	16.98	208880	71050	67732	0	9	Pass2	VarMod	Oxidation M(6)	10234775	ESGVDMLTR	ESGVDMLTR	270	9	4.07	1081	5	5	1	0	25702700	63075		6755	7.2	b3b8b9y4y5y9	173764	915	113948084834664	187896169669328	0.5479	Green	2855	10234770	10234782	156867	114449	114449.00	1.30	1	10234770
NCDO2118_RS00035	GTP-binding protein 11336:12451 forward MW:41242	Regular	7897604	0	412419609	39	10	37	16.98	208880	71050	67732	0	10	Pass2	VarMod	Phosphoryl STY(8)	28943794	ESGVDMLTRAAYHLLGLATYFTAGEK	ESGVDMLTRAAYHLLGLATYFTAGEK	270	26	5.35	1082	0	0	0	0	870101	48371		35	2.0	b3	370475	2616	229536344321096	747681721605482	0.0058	Red	11001	28943561	28943561	254928	1220	1220.00	3.47	4	7243445
NCDO2118_RS00035	GTP-binding protein 11336:12451 forward MW:41242	Regular	7897604	0	412419609	39	10	37	16.98	208880	71050	67732	0	11	Pass2	InSource	None	6353181	DMLTR	ESGVDMLTR	274	5	7.00	1076	4	4	2	1	43109770	0.0000		5852	0.0	b2y3y4y5	173764	580	840836643499463	128167328699893	0.0519	Green	5449	6353192	6353210	187763	10839	10839.00	1.00	1	6353192
NCDO2118_RS00035	GTP-binding protein 11336:12451 forward MW:41242	Regular	7897604	0	412419609	39	10	37	16.98	208880	71050	67732	0	12	Pass2	InSource	None	7914080	GVDMLTR	ESGVDMLTR	272	7	7.00	1076	3	3	0	1	19097090	0.0000		2352	0.0	b3y4y7	173764	733	982868954262199	15657379085244	0.0221	Green	5447	7914100	7914117	187752	4616	4616.00	1.00	1	7914100
NCDO2118_RS00035	GTP-binding protein 11336:12451 forward MW:41242	Regular	7897604	0	412419609	39	10	37	16.98	208880	71050	67732	0	13	Pass2	InSource	None	7343865	VDMLTR	ESGVDMLTR	273	6	7.00	1076	2	2	0	0	8925289	0.0000		516	0.0	y4y6	173764	685	939478145556335	147895629111267	0.0045	Green	5427	7343808	7343826	187541	934	934.00	1.00	1	7343808
NCDO2118_RS00035	GTP-binding protein 11336:12451 forward MW:41242	Regular	11750640	0	412419609	24	7	37	11.59	98707	72852	31442	1	1	Pass1	PepFrag1	None	12556239	AVTMSYDDLLK	AVTMSYDDLLK	326	11	3.88	1081	14	14	9	3	381208500	76512		27137	6.5	b2b3b3b5b5b9b11y1y2y3y4y5y6y7y8y8y9y9y11	250227	1168	134087469870706	940874698707061	0.7151	Green	9153	12556234	12556256	270035	70583	70583.00	1.98	2	6283153
NCDO2118_RS00035	GTP-binding protein 11336:12451 forward MW:41242	Regular	11750640	0	412419609	24	7	37	11.59	98707	72852	31442	0	2	Pass1	PepFrag1	None	13487107	DKDAVAEFNVLK	DKDAVAEFNVLK	159	12	4.31	1082	1	1	0	0	2325710	54366		188	1.5	b5b8y4*y5*y9	243216	1260	141039252514436	101039252514436	0.0127	Yellow	10644	13487041	13487058	288938	1253	1253.00	2.00	2	6748557
NCDO2118_RS00035	GTP-binding protein 11336:12451 forward MW:41242	Regular	11750640	0	412419609	24	7	37	11.59	98707	72852	31442	0	3	Pass1	PepFrag1	None	11055888	DAVAEFNVLK	DAVAEFNVLK	161	10	4.07	1080	2	2	1	0	9219641	60348		334	1.3	b8y6y7	263181	1034	123625101174992	836251011749922	0.0103	Green	8574	11055796	11055824	262279	1016	1016.00	2.00	2	5532934
NCDO2118_RS00035	GTP-binding protein 11336:12451 forward MW:41242	Regular	11750640	0	412419609	24	7	37	11.59	98707	72852	31442	0	4	Pass1	PepFrag1	None	17389262	TVPTTFEFTDIAGIVK	TVPTTFEFTDIAGIVK	62	16	4.07	1083	0	0	0	0	2413487	54527	Missing	93	1.4	b14	355809	1640	16813399523446	12813399523446	0.0079	Yellow	13527	17389270	17389256	334963	775	775.00	2.00	2	8699671
NCDO2118_RS00035	GTP-binding protein 11336:12451 forward MW:41242	Regular	11750640	0	412419609	24	7	37	11.59	98707	72852	31442	0	5	Pass2	PepFrag2	None	9945568	STLFNAITK	STLFNAITK	15	9	10.10	1086	0	0	0	0	830187	49892		34	2.6	b6	223975	940	116014303376569	760143033765691	0.0732	Red	8122	9945763	9945795	256908	7222	7222.00	2.00	2	4977918
NCDO2118_RS00035	GTP-binding protein 11336:12451 forward MW:41242	Regular	11750640	0	412419609	24	7	37	11.59	98707	72852	31442	0	6	Pass2	MissedCleavage	None	17288989	GFIRAVTMSYDDLLK	GFIRAVTMSYDDLLK	322	15	6.84	1084	2	2	1	0	3031307	55517		2195	3.7	b10y14y15	320263	1623	166970076986799	126970076986799	0.1155	Yellow	12356	17289157	17289145	315020	11401	11401.00	2.19	2	8649615
NCDO2118_RS00035	GTP-binding protein 11336:12451 forward MW:41242	Regular	11750640	0	412419609	24	7	37	11.59	98707	72852	31442	0	7	Pass2	VarMod	Oxidation M(4)	12716188	AVTMSYDDLLK	AVTMSYDDLLK	326	11	3.88	1085	2	2	0	0	7013268	59160		789	2.2	b11y7y9	250227	1168	134087469870706	940874698707061	0.0387	Green	9151	12716226	12716247	270011	3817	3817.00	2.00	2	6363149
NCDO2118_RS00035	GTP-binding protein 11336:12451 forward MW:41242	Regular	11750640	0	412419609	24	7	37	11.59	98707	72852	31442	0	8	Pass2	InSource	None	8534302	SYDDLLK	AVTMSYDDLLK	330	7	3.88	1081	2	2	1	0	2608506	0.0000		150	0.0	b4b5b5	250227	779	102357092088037	164714184176075	0.0156	Green	9145	8534320	8534332	269942	1542	1542.00	1.00	1	8534320
NCDO2118_RS00035	GTP-binding protein 11336:12451 forward MW:41242	Regular	11750640	0	412419609	24	7	37	11.59	98707	72852	31442	0	9	Pass2	InSource	None	9844707	MSYDDLLK	AVTMSYDDLLK	329	8	3.88	1081	1	1	0	0	1773105	0.0000		522	0.0	y8	250227	903	112949627001686	185899254003371	0.0111	Green	9146	9844674	9844683	269977	1098	1098.00	1.00	1	9844674
NCDO2118_RS00035	GTP-binding protein 11336:12451 forward MW:41242	Regular	64144380	0	412419609	79	11	37	29.11	318035	260494	125104	1	1	Pass1	PepFrag1	None	17389262	TVPTTFEFTDIAGIVK	TVPTTFEFTDIAGIVK	62	16	4.07	850	18	18	10	5	780017200	86993	Identified	60697	8.8	b2b3b5b6b8b14b16y2y3y6y8y9y10y11y12y12y13y14y14y15y16	367590	1640	16813399523446	12813399523446	0.3522	Green	26534	17389278	17389278	360834	111997	111997.00	2.02	2	8699675
NCDO2118_RS00035	GTP-binding protein 11336:12451 forward MW:41242	Regular	64144380	0	412419609	79	11	37	29.11	318035	260494	125104	0	2	Pass1	PepFrag1	None	13097838	ALTAGIVGLPNVGK	ALTAGIVGLPNVGK	1	14	10.10	847	20	20	14	7	387157200	83950	Identified	33068	7.9	b2b3b3b4b4b5b6b6b8b9b10b14y2y3y4y4*y5y6y7y8y8*y9y10y10*y11y12y14	252854	1274	142082062516004	102082062516004	0.3045	Green	11353	13097777	13097796	278973	96834	96834.00	1.96	2	6553925
NCDO2118_RS00035	GTP-binding protein 11336:12451 forward MW:41242	Regular	64144380	0	412419609	79	11	37	29.11	318035	260494	125104	0	3	Pass1	PepFrag1	None	10906143	AEFLEAIGLK	AEFLEAIGLK	260	10	4.26	849	12	12	7	5	139434000	79515		13633	5.6	b2b3b5b6b7b8y3y4y5y7y8y9y10	314006	1042	124261935390167	842619353901674	0.1624	Green	16539	10906100	10906125	308541	51663	51663.00	1.88	2	5458086
NCDO2118_RS00035	GTP-binding protein 11336:12451 forward MW:41242	Regular	64144380	0	412419609	79	11	37	29.11	318035	260494	125104	0	4	Pass1	PepFrag1	None	12556239	AVTMSYDDLLK	AVTMSYDDLLK	326	11	3.88	846	10	10	5	2	200423700	81091		8364	4.2	b2b3b3b4b5b11y3y4y6y7y8y9y11	274297	1168	134087469870706	940874698707061	0.0690	Green	8935	12556256	12556277	262464	21943	21943.00	1.96	2	6283164
NCDO2118_RS00035	GTP-binding protein 11336:12451 forward MW:41242	Regular	64144380	0	412419609	79	11	37	29.11	318035	260494	125104	0	5	Pass1	PepFrag1	None	9945568	STLFNAITK	STLFNAITK	15	9	10.10	845	9	9	5	2	223664400	81568		7004	3.9	b2b2b3b6b7*b8*y2y3y4y5y5*y5y6y7y9	231336	940	116014303376569	760143033765691	0.0662	Green	5458	9945494	9945520	229414	21049	21049.00	1.89	2	4977783
NCDO2118_RS00035	GTP-binding protein 11336:12451 forward MW:41242	Regular	64144380	0	412419609	79	11	37	29.11	318035	260494	125104	0	6	Pass1	PepFrag1	None	14408243	MALTAGIVGLPNVGK	MALTAGIVGLPNVGK	0	15	10.10	848	3	3	0	0	4892923	64967	Missing	475	2.0	b4b13y7	291412	1398	151157980769917	111157980769917	0.0065	Green	12438	14408200	14408214	285824	2057	2057.00	2.00	2	7209136
NCDO2118_RS00035	GTP-binding protein 11336:12451 forward MW:41242	Regular	64144380	0	412419609	79	11	37	29.11	318035	260494	125104	0	7	Pass2	PepFrag2	None	36448000	ENNREDAFIDPMADIETINLELILADLESVNK	ENNREDAFIDPMADIETINLELILADLESVNK	114	32	3.53	855	0	0	0	0	6615996	66278	Missing	342	2.3	b9y9*y12	498267	3389	272776747537597	963883737687985	0.0045	Green	38882	36446802	36446767	485836	1430	1430.00	4.00	4	9119255
NCDO2118_RS00035	GTP-binding protein 11336:12451 forward MW:41242	Regular	64144380	0	412419609	79	11	37	29.11	318035	260494	125104	0	8	Pass2	MissedCleavage	None	17288989	GFIRAVTMSYDDLLK	GFIRAVTMSYDDLLK	322	15	6.84	852	1	1	0	0	3527020	63546		267	1.8	b10y6y9	344096	1623	166970076986799	713133846578658	0.0050	Green	23031	17288909	17288931	342728	1576	1576.00	3.00	3	5769685
NCDO2118_RS00035	GTP-binding protein 11336:12451 forward MW:41242	Regular	64144380	0	412419609	79	11	37	29.11	318035	260494	125104	0	9	Pass2	MissedCleavage	None	11266830	KLKPVLEDGK	KLKPVLEDGK	171	10	9.76	851	1	1	0	0	1544631	59960	Identified	532	1.3	b7y7y7	262961	1096	128518802506381	885188025063809	0.0033	Green	21987	11266787	11266811	337133	1048	1048.00	2.00	2	5638430
NCDO2118_RS00035	GTP-binding protein 11336:12451 forward MW:41242	Regular	64144380	0	412419609	79	11	37	29.11	318035	260494	125104	0	10	Pass2	VarMod	Phosphoryl STY(3)	13897501	ALTAGIVGLPNVGK	ALTAGIVGLPNVGK	1	14	10.10	853	1	1	0	0	3758617	63822	Identified	239	2.7	b12*y5y14-H3PO4	252854	1274	142082062516004	102082062516004	0.0158	Green	16449	13897572	13897589	307952	5014	5014.00	2.00	2	6953822
NCDO2118_RS00035	GTP-binding protein 11336:12451 forward MW:41242	Regular	64144380	0	412419609	79	11	37	29.11	318035	260494	125104	0	11	Pass2	VarMod	Phosphoryl STY(10)	19469874	KTVPTTFEFTDIAGIVK	KTVPTTFEFTDIAGIVK	61	17	7.00	854	0	0	0	0	1573444	60040	Missing	45	1.6	y9	508121	1775	177238693138861	137238693138861	0.0031	Green	7460	19469885	19469870	247934	985	985.00	2.00	2	9739979
NCDO2118_RS00035	GTP-binding protein 11336:12451 forward MW:41242	Regular	64144380	0	412419609	79	11	37	29.11	318035	260494	125104	0	12	Pass2	InSource	None	7434662	LEAIGLK	AEFLEAIGLK	263	7	7.00	849	4	4	0	0	14731880	0.0000		438	0.0	b5y3y5y7	314006	731	981080293127274	156216058625455	0.0051	Green	16538	7434619	7434637	308539	1616	1616.00	1.00	1	7434619
NCDO2118_RS00035	GTP-binding protein 11336:12451 forward MW:41242	Regular	64144380	0	412419609	79	11	37	29.11	318035	260494	125104	0	13	Pass2	InSource	None	10855183	TMSYDDLLK	AVTMSYDDLLK	328	9	3.88	846	0	0	0	0	844272	0.0000		0	0.0		274297	996	120577384683669	201154769367338	0.0026	Green	8939	10855262	10855276	262491	823	823.00	1.00	1	10855262
NCDO2118_RS00035	GTP-binding protein 11336:12451 forward MW:41242	Regular	46295030	0	412419609	52	7	37	23.18	179793	155905	113168	1	1	Pass1	PepFrag1	None	15636908	VEEEISELEDDEK	VEEEISELEDDEK	247	13	3.33	111	22	22	18	8	1072182000	86958		69227	7.8	b2b3b3b4b4b5b5b6b8b11b12b13y1y2y2y3y4y5y6y7y7y8y8y9y10y10y11y11y12y12y13	216479	1397	151085889207092	111085889207092	0.5563	Green	4990	15636901	15636894	201473	100022	100022.00	2.02	2	7823487
NCDO2118_RS00035	GTP-binding protein 11336:12451 forward MW:41242	Regular	46295030	0	412419609	52	7	37	23.18	179793	155905	113168	0	2	Pass1	PepFrag1	None	12125267	TIDFDEDETK	TIDFDEDETK	184	10	3.43	110	12	12	7	3	278791900	81108		27589	5.7	b2b3b5b10y2y3y4y5y6y7y8y8y9y10	186390	1071	126556934911502	865569349115019	0.3039	Green	4399	12125246	12125255	176876	54648	54648.00	1.98	2	6067659
NCDO2118_RS00035	GTP-binding protein 11336:12451 forward MW:41242	Regular	46295030	0	412419609	52	7	37	23.18	179793	155905	113168	0	3	Pass1	PepFrag1	None	12556239	AVTMSYDDLLK	AVTMSYDDLLK	326	11	3.88	112	3	3	2	0	5122791	63750		417	1.5	y7y8y9	268543	1168	134087469870706	940874698707061	0.0069	Yellow	6047	12556192	12556200	271680	1235	1235.00	2.00	2	6283132
NCDO2118_RS00035	GTP-binding protein 11336:12451 forward MW:41242	Regular	46295030	0	412419609	52	7	37	23.18	179793	155905	113168	0	4	Pass1	PepFrag1	None	13097838	ALTAGIVGLPNVGK	ALTAGIVGLPNVGK	1	14	10.10	113	1	1	0	0	3296776	61836	Missing	75	1.4	y8	288886	1274	142082062516004	102082062516004	0.0045	Yellow	6305	13097803	13097809	286093	810	810.00	2.00	2	6553938
NCDO2118_RS00035	GTP-binding protein 11336:12451 forward MW:41242	Regular	46295030	0	412419609	52	7	37	23.18	179793	155905	113168	0	5	Pass2	PepFrag2	None	10074826	ESGVDMLTR	ESGVDMLTR	270	9	4.07	116	4	4	0	0	7017994	65117		11986	3.5	b9y3y3y7y9	157438	915	113948084834664	187896169669328	0.0932	Yellow	3341	10074570	10074566	151077	16765	16765.00	1.00	1	10074570
NCDO2118_RS00035	GTP-binding protein 11336:12451 forward MW:41242	Regular	46295030	0	412419609	52	7	37	23.18	179793	155905	113168	0	6	Pass2	PepFrag2	None	16097023	AFDDENVMRENNR	AFDDENVMRENNR	105	13	4.06	115	3	3	0	0	3478874	62070		709	1.6	y1y7y8y13	158318	1415	152380920983341	615872806555605	0.0068	Yellow	2726	16097310	16097297	136184	1217	1217.00	2.62	3	5372485
NCDO2118_RS00035	GTP-binding protein 11336:12451 forward MW:41242	Regular	46295030	0	412419609	52	7	37	23.18	179793	155905	113168	0	7	Pass2	PepFrag2	None	17389262	TVPTTFEFTDIAGIVK	TVPTTFEFTDIAGIVK	62	16	4.07	114	3	3	0	0	14892780	68385	Identified	635	1.5	y9y14y16	388262	1640	16813399523446	12813399523446	0.0053	Green	7609	17389451	17389433	366025	952	952.00	2.00	2	8699762
NCDO2118_RS00035	GTP-binding protein 11336:12451 forward MW:41242	Regular	46295030	0	412419609	52	7	37	23.18	179793	155905	113168	0	8	Pass2	InSource	None	9983949	DFDEDETK	TIDFDEDETK	186	8	3.43	110	3	3	0	0	7456663	0.0000		1993	0.0	b8y5y8	186390	854	108825719704185	177651439408369	0.0183	Green	4398	9983966	9983962	176867	3285	3285.00	1.00	1	9983966
NCDO2118_RS00035	GTP-binding protein 11336:12451 forward MW:41242	Regular	46295030	0	412419609	52	7	37	23.18	179793	155905	113168	0	9	Pass2	InSource	None	9644106	SELEDDEK	VEEEISELEDDEK	252	8	3.50	111	1	1	0	0	1645825	0.0000		537	0.0	y8	216479	841	107718500225371	175437000450743	0.0048	Green	4998	9644122	9644121	201654	859	859.00	1.00	1	9644122
NCDO2118_RS00035	GTP-binding protein 11336:12451 forward MW:41242	Regular	12711220	0	412419609	54	9	37	28.30	335741	108817	167359	1	1	Pass1	PepFrag1	None	10074826	ESGVDMLTR	ESGVDMLTR	270	9	4.07	1274	11	11	8	2	408213600	77151		69501	6.8	b2b2b3b3b4b4b5b6b9y1y2y3y4y5y5y7y8y8y9	182521	915	113948084834664	739480848346641	0.2921	Green	7448	10074868	10074887	186251	98065	98065.00	1.89	2	5042470
NCDO2118_RS00035	GTP-binding protein 11336:12451 forward MW:41242	Regular	12711220	0	412419609	54	9	37	28.30	335741	108817	167359	0	2	Pass1	PepFrag1	None	15636908	VEEEISELEDDEK	VEEEISELEDDEK	247	13	3.33	1275	5	5	3	2	20454360	64150		1417	2.7	b3b4y3y8y9y9y10y11	201219	1397	151085889207092	111085889207092	0.0168	Green	9216	15636965	15636971	198934	5648	5648.00	2.00	2	7823519
NCDO2118_RS00035	GTP-binding protein 11336:12451 forward MW:41242	Regular	12711220	0	412419609	54	9	37	28.30	335741	108817	167359	0	3	Pass1	PepFrag1	None	16778442	EFAATENAEVAVISAR	EFAATENAEVAVISAR	231	16	3.96	1276	8	8	1	0	24929060	65009		891	2.8	b3b6b8*b9b12*b16y3y6y7y9y10*y12	260599	1541	161297657411125	121297657411125	0.0152	Green	15656	16778487	16778488	250052	5104	5104.00	2.08	2	8394280
NCDO2118_RS00035	GTP-binding protein 11336:12451 forward MW:41242	Regular	12711220	0	412419609	54	9	37	28.30	335741	108817	167359	0	4	Pass1	PepFrag1	None	15586842	EYVGQDGDIMEFR	EYVGQDGDIMEFR	355	13	3.59	1277	6	6	2	1	26661370	65301		1081	2.2	b2b4b5b10y4y9y10y11	263492	1387	15036402466178	11036402466178	0.0091	Green	16052	15586868	15586874	253222	3042	3042.00	2.00	2	7798471
NCDO2118_RS00035	GTP-binding protein 11336:12451 forward MW:41242	Regular	12711220	0	412419609	54	9	37	28.30	335741	108817	167359	0	5	Pass2	PepFrag2	None	7334355	FLANIR	FLANIR	89	6	11.05	1278	2	2	0	0	1503827	52814		78320	4.0	b6y3*y5*y6	200198	694	947689235915607	149537847183121	0.5621	Yellow	2188	7334403	7334423	137412	188711	188711.00	1.01	1	7334403
NCDO2118_RS00035	GTP-binding protein 11336:12451 forward MW:41242	Regular	12711220	0	412419609	54	9	37	28.30	335741	108817	167359	0	6	Pass2	PepFrag2	None	10964728	AFDDENVMR	AFDDENVMR	105	9	3.70	1282	2	2	0	0	2394198	54833		457	1.2	y5y8	186714	966	118143831644999	781438316449989	0.0028	Yellow	6342	10964904	10964923	177523	930	930.00	2.00	2	5487488
NCDO2118_RS00035	GTP-binding protein 11336:12451 forward MW:41242	Regular	12711220	0	412419609	54	9	37	28.30	335741	108817	167359	0	7	Pass2	MissedCleavage	None	18198782	AVTMSYDDLLKYGSEK	AVTMSYDDLLKYGSEK	326	16	4.31	1279	3	3	0	0	3286400	56209		289	1.9	b3b10b11b14b14y11	252237	1674	170449842120481	130449842120481	0.0054	Yellow	17010	18198725	18198719	263330	1816	1816.00	2.00	2	9104399
NCDO2118_RS00035	GTP-binding protein 11336:12451 forward MW:41242	Regular	12711220	0	412419609	54	9	37	28.30	335741	108817	167359	0	8	Pass2	VarMod	Oxidation M(16)	22870659	LREEGKEYVGQDGDIMEFR	LREEGKEYVGQDGDIMEFR	349	19	4.13	1280	5	5	0	0	2467290	54964		3035	2.8	b11y1y4y9y11*y12y19	236533	2060	195736182746551	904907884977009	0.0119	Yellow	16802	22870664	22870661	261503	3991	3991.00	2.43	3	7630270
NCDO2118_RS00035	GTP-binding protein 11336:12451 forward MW:41242	Regular	12711220	0	412419609	54	9	37	28.30	335741	108817	167359	0	9	Pass2	VarMod	Phosphoryl STY(*)	28943794	ESGVDMLTRAAYHLLGLATYFTAGEK	ESGVDMLTRAAYHLLGLATYFTAGEK	270	26	5.35	1281	4	4	0	0	2498215	55018		1867	3.0	b7b11-H3PO4b13b26y6y8y9y11y12	371095	2616	229536344321096	113024229547398	0.0110	Yellow	16013	28943727	28943654	252900	3689	3689.00	3.20	3	9654624
NCDO2118_RS00035	GTP-binding protein 11336:12451 forward MW:41242	Regular	12711220	0	412419609	54	9	37	28.30	335741	108817	167359	0	10	Pass2	InSource	None	6353181	DMLTR	ESGVDMLTR	274	5	7.00	1274	6	6	2	0	116924100	0.0000		9584	0.0	b2b4b5y2y4y5	182521	580	840836643499463	128167328699893	0.0624	Green	7437	6353156	6353175	186192	20946	20946.00	1.00	1	6353156
NCDO2118_RS00035	GTP-binding protein 11336:12451 forward MW:41242	Regular	12711220	0	412419609	54	9	37	28.30	335741	108817	167359	0	11	Pass2	InSource	None	5202912	MLTR	ESGVDMLTR	275	4	11.05	1274	2	2	0	0	2613212	0.0000		864	0.0	y1y4	182521	489	750410450581855	110082090116371	0.0086	Green	7449	5202908	5202927	186257	2874	2874.00	1.00	1	5202908
NCDO2118_RS00035	GTP-binding protein 11336:12451 forward MW:41242	Regular	12711220	0	412419609	54	9	37	28.30	335741	108817	167359	0	12	Pass2	InSource	None	4701882	ESGVD	ESGVDMLTR	270	5	3.01	1274	0	0	0	0	1164496	0.0000		53	0.0	b4	182521	426	684488307067779	968976614135557	0.0028	Green	7444	4701876	4701893	186235	925	925.00	1.00	1	4701876
NCDO2118_RS00035	GTP-binding protein 11336:12451 forward MW:41242	Regular	20014820	0	412419609	48	9	37	24.26	169299	131886	84604	1	1	Pass1	PepFrag1	None	12556239	AVTMSYDDLLK	AVTMSYDDLLK	326	11	3.88	1061	15	15	11	4	592067100	80737		70888	7.8	b2b3b3b4b4b5b9b11b11y1y2y3y4y5y6y7y8y8y9y9y11	250959	1168	134087469870706	940874698707061	0.7074	Green	13093	12556224	12556234	269184	119759	119759.00	1.94	2	6283149
NCDO2118_RS00035	GTP-binding protein 11336:12451 forward MW:41242	Regular	20014820	0	412419609	48	9	37	24.26	169299	131886	84604	0	2	Pass1	PepFrag1	None	11506579	EVDAIIHVVR	EVDAIIHVVR	95	10	5.22	1057	6	6	3	0	46580700	69696		1916	2.6	b3b3y2y3y4y5y10	223561	1096	128518802506381	885188025063809	0.0389	Green	8060	11506574	11506587	228434	6580	6580.00	1.89	2	5758323
NCDO2118_RS00035	GTP-binding protein 11336:12451 forward MW:41242	Regular	20014820	0	412419609	48	9	37	24.26	169299	131886	84604	0	3	Pass1	PepFrag1	None	11055888	DAVAEFNVLK	DAVAEFNVLK	161	10	4.07	1060	6	6	1	0	34697220	68416		1562	2.5	b2b9y2y6y7y10	263384	1034	123625101174992	836251011749922	0.0328	Green	12276	11055860	11055874	261503	5547	5547.00	1.86	2	5532966
NCDO2118_RS00035	GTP-binding protein 11336:12451 forward MW:41242	Regular	20014820	0	412419609	48	9	37	24.26	169299	131886	84604	0	4	Pass1	PepFrag1	None	16778442	EFAATENAEVAVISAR	EFAATENAEVAVISAR	231	16	3.96	1059	1	1	0	0	3685688	58679		263	2.5	b3b12	270239	1541	161297657411125	121297657411125	0.0207	Green	12169	16778444	16778433	260716	3502	3502.00	2.00	2	8394259
NCDO2118_RS00035	GTP-binding protein 11336:12451 forward MW:41242	Regular	20014820	0	412419609	48	9	37	24.26	169299	131886	84604	0	5	Pass1	PepFrag1	None	13487107	DKDAVAEFNVLK	DKDAVAEFNVLK	159	12	4.31	1058	0	0	0	0	3417397	58350		173	1.6	b10	246569	1260	141039252514436	101039252514436	0.0089	Yellow	10928	13487022	13487029	250299	1506	1506.00	2.00	2	6748548
NCDO2118_RS00035	GTP-binding protein 11336:12451 forward MW:41242	Regular	20014820	0	412419609	48	9	37	24.26	169299	131886	84604	0	6	Pass2	MissedCleavage	None	17288989	GFIRAVTMSYDDLLK	GFIRAVTMSYDDLLK	322	15	6.84	1063	3	3	0	0	8132739	62116		1638	3.2	b8b10y6y15	313286	1623	166970076986799	126970076986799	0.0455	Green	18191	17289105	17289091	314476	7705	7705.00	2.15	2	8649589
NCDO2118_RS00035	GTP-binding protein 11336:12451 forward MW:41242	Regular	20014820	0	412419609	48	9	37	24.26	169299	131886	84604	0	7	Pass2	MissedCleavage	None	18739299	GMKAPQMAGIIHTDFEK	GMKAPQMAGIIHTDFEK	305	17	7.79	1062	1	1	0	0	2627596	57209	Identified	1236	1.8	b7*b16*y7y13y14*	242260	1746	175302910700427	135302910700427	0.0081	Yellow	16554	18739308	18739283	299796	1378	1378.00	2.00	2	9374691
NCDO2118_RS00035	GTP-binding protein 11336:12451 forward MW:41242	Regular	20014820	0	412419609	48	9	37	24.26	169299	131886	84604	0	8	Pass2	VarMod	Oxidation M(4)	12716188	AVTMSYDDLLK	AVTMSYDDLLK	326	11	3.88	1065	5	5	1	0	13985830	64470		2822	3.5	b4b4b11y8y9y9y11	250959	1168	134087469870706	940874698707061	0.0758	Green	13085	12716232	12716241	269136	12830	12830.00	1.97	2	6363152
NCDO2118_RS00035	GTP-binding protein 11336:12451 forward MW:41242	Regular	20014820	0	412419609	48	9	37	24.26	169299	131886	84604	0	9	Pass2	VarMod	Phosphoryl STY(3);Phosphoryl STY(13)	23700930	AAYHLLGLATYFTAGEKEVR	AAYHLLGLATYFTAGEKEVR	279	20	7.69	1064	4	4	1	0	3545221	58510		1838	3.3	b8b9b17-H3PO4y10y12-H3PO4y19-H3PO4y20	300348	2063	195926171780229	155926171780229	0.0373	Green	21048	23700827	23700755	345845	6308	6308.00	2.29	2	11855450
NCDO2118_RS00035	GTP-binding protein 11336:12451 forward MW:41242	Regular	20014820	0	412419609	48	9	37	24.26	169299	131886	84604	0	10	Pass2	InSource	None	9844707	MSYDDLLK	AVTMSYDDLLK	329	8	3.88	1061	5	5	0	0	6407991	0.0000		1856	0.0	b5b8y4y6y8	250959	903	112949627001686	185899254003371	0.0178	Green	13079	9844766	9844773	269114	3013	3013.00	1.00	1	9844766
NCDO2118_RS00035	GTP-binding protein 11336:12451 forward MW:41242	Regular	20014820	0	412419609	48	9	37	24.26	169299	131886	84604	0	11	Pass2	InSource	None	7663981	YDDLLK	AVTMSYDDLLK	331	6	3.88	1061	2	2	0	0	5179597	0.0000		412	0.0	b3y6	250959	706	958582364698963	151716472939793	0.0069	Green	13105	7663972	7663983	269232	1171	1171.00	1.00	1	7663972
NCDO2118_RS00035	GTP-binding protein 11336:12451 forward MW:41242	Regular	73269010	0	412419609	77	12	37	31.54	787586	600003	343215	1	1	Pass1	PepFrag1	None	13097838	ALTAGIVGLPNVGK	ALTAGIVGLPNVGK	1	14	10.10	824	16	16	12	5	526173200	85860	Identified	139206	11.7	b3b4b4b5b5b6b6b7b7b9b12y2y5y5*y6y7y8y9y10y11y12y13y13*y14y14*	258931	1274	142082062516004	102082062516004	0.3637	Green	16491	13097802	13097823	277503	286455	286455.00	1.94	2	6553937
NCDO2118_RS00035	GTP-binding protein 11336:12451 forward MW:41242	Regular	73269010	0	412419609	77	12	37	31.54	787586	600003	343215	0	2	Pass1	PepFrag1	None	17389262	TVPTTFEFTDIAGIVK	TVPTTFEFTDIAGIVK	62	16	4.07	826	15	15	9	5	674511200	86939	Identified	101103	10.6	b2b3b5b6b7b14y2y5y6y7y9y10y11y12y12y13y14y14y15	366094	1640	16813399523446	12813399523446	0.2398	Green	36691	17389284	17389288	357651	188837	188837.00	2.02	2	8699678
NCDO2118_RS00035	GTP-binding protein 11336:12451 forward MW:41242	Regular	73269010	0	412419609	77	12	37	31.54	787586	600003	343215	0	3	Pass1	PepFrag1	None	9945568	STLFNAITK	STLFNAITK	15	9	10.10	821	11	11	8	2	387917500	84537		44039	7.4	b2b2b3b4b5*b6*b7*b7y1y2y2y3y4y5y5*y6y6y7y8y9	237083	940	116014303376569	760143033765691	0.1583	Green	8446	9945472	9945498	239253	124711	124711.00	1.85	2	4977773
NCDO2118_RS00035	GTP-binding protein 11336:12451 forward MW:41242	Regular	73269010	0	412419609	77	12	37	31.54	787586	600003	343215	0	4	Pass1	PepFrag1	None	10906143	AEFLEAIGLK	AEFLEAIGLK	260	10	4.26	825	11	11	6	4	136568500	80003		21018	6.4	b2b3b5b6b8y4y5y7y8y9y10	308801	1042	124261935390167	842619353901674	0.0967	Green	23723	10906139	10906163	305070	76179	76179.00	1.85	2	5458106
NCDO2118_RS00035	GTP-binding protein 11336:12451 forward MW:41242	Regular	73269010	0	412419609	77	12	37	31.54	787586	600003	343215	0	5	Pass1	PepFrag1	None	12556239	AVTMSYDDLLK	AVTMSYDDLLK	326	11	3.88	823	7	7	3	2	270278100	82967		21276	6.2	b2b3b3b5y3y7y8y9y9y11	267283	1168	134087469870706	940874698707061	0.0798	Green	12888	12556224	12556246	262012	62831	62831.00	1.95	2	6283148
NCDO2118_RS00035	GTP-binding protein 11336:12451 forward MW:41242	Regular	73269010	0	412419609	77	12	37	31.54	787586	600003	343215	0	6	Pass1	PepFrag1	None	34677832	SLFLLTSKPVLYVANVSEDEVGEPDNIEYVK	SLFLLTSKPVLYVANVSEDEVGEPDNIEYVK	197	31	3.82	827	7	7	2	0	32066340	73710	Identified	12074	5.7	b9b26y4y6y8y10y11y27y28y31	464102	3249	265211758459678	136807838973119	0.0232	Green	52252	34677721	34677594	466049	18262	18262.00	3.14	3	11565955
NCDO2118_RS00035	GTP-binding protein 11336:12451 forward MW:41242	Regular	73269010	0	412419609	77	12	37	31.54	787586	600003	343215	0	7	Pass1	PepFrag1	None	15577730	APQMAGIIHTDFEK	APQMAGIIHTDFEK	308	14	5.22	829	2	2	0	0	6712379	66918	Identified	603	3.5	b8*b11b13y5y13*	255857	1439	154099121719543	114099121719543	0.0127	Green	13391	15577624	15577637	263901	10041	10041.00	2.00	2	7793848
NCDO2118_RS00035	GTP-binding protein 11336:12451 forward MW:41242	Regular	73269010	0	412419609	77	12	37	31.54	787586	600003	343215	0	8	Pass1	PepFrag1	None	12336838	DAVAEFNVLKK	DAVAEFNVLKK	161	11	7.00	822	0	0	0	0	1960192	61572		614	3.1	y9	216821	1169	13416399289791	941639928979102	0.0124	Green	10814	12336822	12336844	251423	9752	9752.00	2.00	2	6173447
NCDO2118_RS00035	GTP-binding protein 11336:12451 forward MW:41242	Regular	73269010	0	412419609	77	12	37	31.54	787586	600003	343215	0	9	Pass1	PepFrag1	None	14408243	MALTAGIVGLPNVGK	MALTAGIVGLPNVGK	0	15	10.10	828	2	2	1	0	5640288	66162	Missing	644	2.9	y7y8	296138	1398	151157980769917	111157980769917	0.0074	Green	18054	14408246	14408263	283696	5841	5841.00	2.00	2	7209159
NCDO2118_RS00035	GTP-binding protein 11336:12451 forward MW:41242	Regular	73269010	0	412419609	77	12	37	31.54	787586	600003	343215	0	10	Pass2	VarMod	Phosphoryl STY(3)	13897501	ALTAGIVGLPNVGK	ALTAGIVGLPNVGK	1	14	10.10	831	2	2	0	0	2829552	63166	Identified	295	1.9	b7y5y12	258931	1274	142082062516004	102082062516004	0.0025	Green	40824	13897470	13897489	374778	1937	1937.00	2.00	2	6953772
NCDO2118_RS00035	GTP-binding protein 11336:12451 forward MW:41242	Regular	73269010	0	412419609	77	12	37	31.54	787586	600003	343215	0	11	Pass2	VarMod	Oxidation M(1);Phosphoryl STY(4)	15367855	MALTAGIVGLPNVGK	MALTAGIVGLPNVGK	0	15	10.10	830	2	2	0	0	6205890	66577	Identified	1198	1.9	b13b13-H3PO4b14-H3PO4y5y12*	296138	1398	151157980769917	111157980769917	0.0023	Green	20334	15367895	15367909	292695	1789	1789.00	2.00	2	7688984
NCDO2118_RS00035	GTP-binding protein 11336:12451 forward MW:41242	Regular	73269010	0	412419609	77	12	37	31.54	787586	600003	343215	0	12	Pass2	VarMod	Phosphoryl STY(4)	24963295	MALTAGIVGLPNVGKSTLFNAITK	MALTAGIVGLPNVGKSTLFNAITK	0	24	10.60	832	2	2	0	0	3117528	63587	Missing	1145	1.8	y6y15b12-H3PO4	375512	2338	212972063462397	172972063462397	0.0012	Green	37818	24963294	24963243	362079	951	951.00	2.00	2	12486683
NCDO2118_RS00035	GTP-binding protein 11336:12451 forward MW:41242	Regular	7466907	0	412419609	34	9	37	17.25	30227	14208	10991	1	1	Pass1	PepFrag1	None	15636908	VEEEISELEDDEK	VEEEISELEDDEK	247	13	3.33	479	8	8	5	3	22908530	62331		1886	3.2	b2b3b4b5b6y7y8y10y11	235325	1397	151085889207092	111085889207092	0.2968	Yellow	3333	15636972	15636972	200572	8970	8970.00	2.00	2	7823523
NCDO2118_RS00035	GTP-binding protein 11336:12451 forward MW:41242	Regular	7466907	0	412419609	34	9	37	17.25	30227	14208	10991	0	2	Pass1	PepFrag1	None	17389262	TVPTTFEFTDIAGIVK	TVPTTFEFTDIAGIVK	62	16	4.07	482	3	3	0	0	60822710	66572	Identified	1524	2.3	y9y12y14y14	370812	1640	16813399523446	12813399523446	0.0934	Yellow	7023	17389296	17389285	365224	2823	2823.00	2.00	2	8699684
NCDO2118_RS00035	GTP-binding protein 11336:12451 forward MW:41242	Regular	7466907	0	412419609	34	9	37	17.25	30227	14208	10991	0	3	Pass1	PepFrag1	None	12556239	AVTMSYDDLLK	AVTMSYDDLLK	326	11	3.88	480	6	6	4	2	73622520	67402		589	1.9	b2b3y6y7y8y9	266426	1168	134087469870706	940874698707061	0.0799	Yellow	4666	12556252	12556266	270723	2415	2415.00	2.00	2	6283163
NCDO2118_RS00035	GTP-binding protein 11336:12451 forward MW:41242	Regular	7466907	0	412419609	34	9	37	17.25	30227	14208	10991	0	4	Pass1	PepFrag1	None	13097838	ALTAGIVGLPNVGK	ALTAGIVGLPNVGK	1	14	10.10	481	8	8	5	1	32406550	63838	Identified	563	2.0	b2b3y5y6y7y8y10y11	269715	1274	142082062516004	102082062516004	0.0711	Yellow	5016	13097794	13097805	285411	2150	2150.00	2.00	2	6553933
NCDO2118_RS00035	GTP-binding protein 11336:12451 forward MW:41242	Regular	7466907	0	412419609	34	9	37	17.25	30227	14208	10991	0	5	Pass1	PepFrag1	None	12125267	TIDFDEDETK	TIDFDEDETK	184	10	3.43	478	3	3	2	0	11445900	59318		490	1.5	y6y7y8	188138	1071	126556934911502	865569349115019	0.0448	Red	2832	12125339	12125354	176485	1354	1354.00	2.00	2	6067706
NCDO2118_RS00035	GTP-binding protein 11336:12451 forward MW:41242	Regular	7466907	0	412419609	34	9	37	17.25	30227	14208	10991	0	6	Pass2	PepFrag2	None	10074826	ESGVDMLTR	ESGVDMLTR	270	9	4.07	486	3	3	0	0	7935013	57727		5186	2.8	b9y3y9	171396	915	113948084834664	187896169669328	0.2818	Red	2099	10074567	10074578	150599	8517	8517.00	1.00	1	10074567
NCDO2118_RS00035	GTP-binding protein 11336:12451 forward MW:41242	Regular	7466907	0	412419609	34	9	37	17.25	30227	14208	10991	0	7	Pass2	PepFrag2	None	10906143	AEFLEAIGLK	AEFLEAIGLK	260	10	4.26	485	0	0	0	0	2689343	53028		41	1.6	y8	303174	1042	124261935390167	842619353901674	0.0579	Red	5056	10905914	10905932	286788	1749	1749.00	2.00	2	5457994
NCDO2118_RS00035	GTP-binding protein 11336:12451 forward MW:41242	Regular	7466907	0	412419609	34	9	37	17.25	30227	14208	10991	0	8	Pass2	PepFrag2	None	16778442	EFAATENAEVAVISAR	EFAATENAEVAVISAR	231	16	3.96	483	0	0	0	0	1433839	50296		35	1.7	b12	279980	1541	161297657411125	121297657411125	0.0407	Red	6166	16778281	16778274	332444	1230	1230.00	2.00	2	8394177
NCDO2118_RS00035	GTP-binding protein 11336:12451 forward MW:41242	Regular	7466907	0	412419609	34	9	37	17.25	30227	14208	10991	0	9	Pass2	VarMod	Oxidation M(1);Phosphoryl STY(16);Phosphoryl STY(23)	25922907	MALTAGIVGLPNVGKSTLFNAITK	MALTAGIVGLPNVGKSTLFNAITK	0	24	10.60	484	3	3	0	0	2540958	52781	Missing	677	1.8	b5b6b16y7y13-H3PO4y24	383177	2338	212972063462397	101981375641598	0.0337	Red	5771	25922932	25922912	316535	1019	1019.00	3.00	3	8647692
NCDO2118_RS00035	GTP-binding protein 11336:12451 forward MW:41242	Regular	12211800	0	412419609	33	3	37	8.63	70151	92136	30123	1	1	Pass1	PepFrag1	None	15636908	VEEEISELEDDEK	VEEEISELEDDEK	247	13	3.33	73	20	20	16	7	293575000	75545		18168	5.9	b2b3b4b4b5b5b6b7b8b9b13y2y3y5y6y7y8y8y9y10y10y11y11y12y13	201628	1397	151085889207092	111085889207092	0.6638	Green	4326	15636920	15636913	201628	46565	46565.00	2.01	2	7823496
NCDO2118_RS00035	GTP-binding protein 11336:12451 forward MW:41242	Regular	12211800	0	412419609	33	3	37	8.63	70151	92136	30123	0	2	Pass1	PepFrag1	None	12125267	TIDFDEDETK	TIDFDEDETK	184	10	3.43	72	9	9	5	2	68929870	69252		6223	3.5	b2b3y2y4y6y7y8y8y9y10	177278	1071	126556934911502	865569349115019	0.2118	Green	3802	12125261	12125265	177278	14859	14859.00	2.00	2	6067667
NCDO2118_RS00035	GTP-binding protein 11336:12451 forward MW:41242	Regular	12211800	0	412419609	33	3	37	8.63	70151	92136	30123	0	3	Pass2	PepFrag2	None	10074826	ESGVDMLTR	ESGVDMLTR	270	9	4.07	74	4	4	0	0	2755968	55271		5732	2.8	b9b9y3y7y9	151921	915	113948084834664	187896169669328	0.1244	Yellow	2913	10074572	10074567	151921	8727	8727.00	1.00	1	10074572
NCDO2118_RS00035	GTP-binding protein 11336:12451 forward MW:41242	Regular	9819574	0	412419609	24	7	37	20.49	65207	57066	26657	1	1	Pass1	PepFrag1	None	10074826	ESGVDMLTR	ESGVDMLTR	270	9	4.07	1046	11	11	8	3	384109900	75765		25086	5.4	b2b3b3b4b5y1y3y4y4y5y5y6y7y8y8y9	183705	915	113948084834664	739480848346641	0.7924	Green	6276	10074765	10074784	186585	51667	51667.00	1.94	2	5042419
NCDO2118_RS00035	GTP-binding protein 11336:12451 forward MW:41242	Regular	9819574	0	412419609	24	7	37	20.49	65207	57066	26657	0	2	Pass1	PepFrag1	None	7334355	FLANIR	FLANIR	89	6	11.05	1050	3	3	1	0	1235808	50840		525	1.7	b5b6y5	184469	694	947689235915607	149537847183121	0.0536	Yellow	2091	7334401	7334417	141921	3497	3497.00	1.00	1	7334401
NCDO2118_RS00035	GTP-binding protein 11336:12451 forward MW:41242	Regular	9819574	0	412419609	24	7	37	20.49	65207	57066	26657	0	3	Pass1	PepFrag1	None	22710710	LREEGKEYVGQDGDIMEFR	LREEGKEYVGQDGDIMEFR	349	19	4.13	1047	0	0	0	0	821187	49065		87	2.1	y7	224322	2060	195736182746551	904907884977009	0.0292	Red	7291	22710551	22710529	196174	1902	1902.00	3.00	3	7576899
NCDO2118_RS00035	GTP-binding protein 11336:12451 forward MW:41242	Regular	9819574	0	412419609	24	7	37	20.49	65207	57066	26657	0	4	Pass1	PepFrag1	None	16778442	EFAATENAEVAVISAR	EFAATENAEVAVISAR	231	16	3.96	1051	1	1	0	0	3518819	55385		142	1.8	y11y12y14*	258193	1541	161297657411125	121297657411125	0.0215	Yellow	13068	16778416	16778418	250810	1404	1404.00	2.00	2	8394245
NCDO2118_RS00035	GTP-binding protein 11336:12451 forward MW:41242	Regular	9819574	0	412419609	24	7	37	20.49	65207	57066	26657	0	5	Pass1	PepFrag1	None	15636908	VEEEISELEDDEK	VEEEISELEDDEK	247	13	3.33	1048	4	4	0	0	6890170	58303		290	1.5	b4b6b10y8y10	213153	1397	151085889207092	111085889207092	0.0164	Green	7705	15636974	15636979	199433	1072	1072.00	2.00	2	7823523
NCDO2118_RS00035	GTP-binding protein 11336:12451 forward MW:41242	Regular	9819574	0	412419609	24	7	37	20.49	65207	57066	26657	0	6	Pass1	PepFrag1	None	15586842	EYVGQDGDIMEFR	EYVGQDGDIMEFR	355	13	3.59	1049	3	3	2	0	1321717	51132		222	1.3	b6y7y8y9	272105	1387	15036402466178	11036402466178	0.0119	Yellow	13253	15586925	15586931	253350	774	774.00	2.00	2	7798499
NCDO2118_RS00035	GTP-binding protein 11336:12451 forward MW:41242	Regular	9819574	0	412419609	24	7	37	20.49	65207	57066	26657	0	7	Pass2	MissedCleavage	None	15527741	TIDFDEDETKVLK	TIDFDEDETKVLK	184	13	3.86	1052	0	0	0	0	3858752	55785		43	2.4	y9	244394	1435	153813422202609	113813422202609	0.0621	Yellow	12508	15527617	15527624	244313	4050	4050.00	2.00	2	7768845
NCDO2118_RS00035	GTP-binding protein 11336:12451 forward MW:41242	Regular	9819574	0	412419609	24	7	37	20.49	65207	57066	26657	0	8	Pass2	InSource	None	5202912	MLTR	ESGVDMLTR	275	4	11.05	1046	2	2	0	0	1800006	0.0000		262	0.0	y1y4	183705	489	750410450581855	110082090116371	0.0129	Green	6269	5202886	5202904	186537	841	841.00	1.00	1	5202886
NCDO2118_RS00035	GTP-binding protein 11336:12451 forward MW:41242	Regular	10821070	0	412419609	24	7	37	26.15	98382	44842.5	17534	1	1	Pass1	PepFrag1	None	12556239	AVTMSYDDLLK	AVTMSYDDLLK	326	11	3.88	1162	11	11	7	2	352783500	75818		9963	4.7	b2b3b3b10b11b11y3y4y5y6y7y8y9y9y10y11	250212	1168	134087469870706	940874698707061	0.2949	Green	10282	12556225	12556244	268940	29014	29014.00	1.97	2	6283149
NCDO2118_RS00035	GTP-binding protein 11336:12451 forward MW:41242	Regular	10821070	0	412419609	24	7	37	26.15	98382	44842.5	17534	0	2	Pass1	PepFrag1	None	20790791	AEFLEAIGLKESGVDMLTR	AEFLEAIGLKESGVDMLTR	260	19	4.16	1163	0	0	0	0	2738510	54718		83	1.6	b16y9	341527	1957	189156027452395	149156027452395	0.0090	Yellow	15508	20790655	20790615	336988	881	881.00	2.00	2	10400364
NCDO2118_RS00035	GTP-binding protein 11336:12451 forward MW:41242	Regular	10821070	0	412419609	24	7	37	26.15	98382	44842.5	17534	0	3	Pass2	PepFrag2	None	20018858	EEGKEYVGQDGDIMEFR	EEGKEYVGQDGDIMEFR	351	17	3.82	1165	3	3	0	0	1813361	52928		163	5.5	y1y5y7	255083	1788	178103031019338	787353540128918	0.3070	Yellow	7788	20019081	20019097	244166	30205	30205.00	2.89	3	6679742
NCDO2118_RS00035	GTP-binding protein 11336:12451 forward MW:41242	Regular	10821070	0	412419609	24	7	37	26.15	98382	44842.5	17534	0	4	Pass2	PepFrag2	None	32876716	EDAFIDPMADIETINLELILADLESVNKR	EDAFIDPMADIETINLELILADLESVNKR	118	29	3.57	1164	0	0	0	0	1763510	52806	Missing	33	2.3	y10*	452423	3088	25637627230765	130917514871766	0.0158	Yellow	16319	32876967	32876875	352272	1553	1553.00	3.00	3	10965704
NCDO2118_RS00035	GTP-binding protein 11336:12451 forward MW:41242	Regular	10821070	0	412419609	24	7	37	26.15	98382	44842.5	17534	0	5	Pass2	MissedCleavage	None	18739299	GMKAPQMAGIIHTDFEK	GMKAPQMAGIIHTDFEK	305	17	7.79	1166	4	4	0	0	7304699	58979	Identified	4546	5.1	b9y4y7y11y13y17	232551	1746	175302910700427	135302910700427	0.2387	Green	12178	18739249	18739229	292093	23482	23482.00	2.02	2	9374661
NCDO2118_RS00035	GTP-binding protein 11336:12451 forward MW:41242	Regular	10821070	0	412419609	24	7	37	26.15	98382	44842.5	17534	0	6	Pass2	MissedCleavage	None	17288989	GFIRAVTMSYDDLLK	GFIRAVTMSYDDLLK	322	15	6.84	1167	4	4	1	0	8543720	59659		2323	3.7	y2y6y9y14y15	304435	1623	166970076986799	126970076986799	0.1134	Green	13977	17289120	17289112	314599	11157	11157.00	2.19	2	8649596
NCDO2118_RS00035	GTP-binding protein 11336:12451 forward MW:41242	Regular	10821070	0	412419609	24	7	37	26.15	98382	44842.5	17534	0	7	Pass2	VarMod	Oxidation M(4)	12716188	AVTMSYDDLLK	AVTMSYDDLLK	326	11	3.88	1168	2	2	0	0	5500482	57747		423	1.8	b10y8y9	250212	1168	134087469870706	940874698707061	0.0212	Green	10268	12716226	12716244	268850	2090	2090.00	2.00	2	6363149
NCDO2118_RS00035	GTP-binding protein 11336:12451 forward MW:41242	Regular	45019300	0	412419609	78	13	37	46.63	269496	204343	103904	1	1	Pass1	PepFrag1	None	13097838	ALTAGIVGLPNVGK	ALTAGIVGLPNVGK	1	14	10.10	1285	17	17	11	6	366698400	82177	Identified	41431	8.2	b3b3b4b5b5b6b6b7b7b8b9b14y2y5y6y7y8y9y10y10*y11y12y12y14	257872	1274	142082062516004	102082062516004	0.4000	Green	13368	13097799	13097817	280211	107786	107786.00	1.96	2	6553936
NCDO2118_RS00035	GTP-binding protein 11336:12451 forward MW:41242	Regular	45019300	0	412419609	78	13	37	46.63	269496	204343	103904	0	2	Pass1	PepFrag1	None	17389262	TVPTTFEFTDIAGIVK	TVPTTFEFTDIAGIVK	62	16	4.07	1287	10	10	4	0	221433600	79986	Identified	34440	7.2	b5b8y2y4y6y7y9y10y11y12y14y14y16	360933	1640	16813399523446	12813399523446	0.2445	Green	31371	17389326	17389326	360007	65891	65891.00	2.02	2	8699700
NCDO2118_RS00035	GTP-binding protein 11336:12451 forward MW:41242	Regular	45019300	0	412419609	78	13	37	46.63	269496	204343	103904	0	3	Pass1	PepFrag1	None	10906143	AEFLEAIGLK	AEFLEAIGLK	260	10	4.26	1286	13	13	10	5	225900900	80073		9057	4.6	b2b3b4b5b6b7b8y4y5y6y7y8y9y10	313426	1042	124261935390167	842619353901674	0.1138	Green	19635	10906122	10906144	308208	30666	30666.00	1.90	2	5458097
NCDO2118_RS00035	GTP-binding protein 11336:12451 forward MW:41242	Regular	45019300	0	412419609	78	13	37	46.63	269496	204343	103904	0	4	Pass1	PepFrag1	None	9945568	STLFNAITK	STLFNAITK	15	9	10.10	1283	10	10	6	2	323268700	81630		8992	4.3	b2b2b3b7b8y2y3y4y5y5y6y7y9	231005	940	116014303376569	760143033765691	0.1034	Green	6799	9945514	9945538	241377	27859	27859.00	1.90	2	4977794
NCDO2118_RS00035	GTP-binding protein 11336:12451 forward MW:41242	Regular	45019300	0	412419609	78	13	37	46.63	269496	204343	103904	0	5	Pass1	PepFrag1	None	12556239	AVTMSYDDLLK	AVTMSYDDLLK	326	11	3.88	1284	11	11	6	3	221802800	79994		7428	3.9	b2b3b3b4b11y3y5y6y7y8y9y9y11	274595	1168	134087469870706	940874698707061	0.0682	Green	10351	12556238	12556258	264645	18377	18377.00	1.96	2	6283156
NCDO2118_RS00035	GTP-binding protein 11336:12451 forward MW:41242	Regular	45019300	0	412419609	78	13	37	46.63	269496	204343	103904	0	6	Pass1	PepFrag1	None	11055888	DAVAEFNVLK	DAVAEFNVLK	161	10	4.07	1289	5	5	0	1	30619520	71394		836	1.4	b3b9b9*y2y5y7	267169	1034	123625101174992	836251011749922	0.0044	Green	9464	11055884	11055906	259220	1194	1194.00	2.00	2	5532978
NCDO2118_RS00035	GTP-binding protein 11336:12451 forward MW:41242	Regular	45019300	0	412419609	78	13	37	46.63	269496	204343	103904	0	7	Pass2	PepFrag2	None	7334355	FLANIR	FLANIR	89	6	11.05	1288	0	0	0	0	172878	48911		48	1.7	b5*	172119	694	947689235915607	149537847183121	0.0118	Red	16621	7334271	7334290	295366	3192	3192.00	1.00	1	7334271
NCDO2118_RS00035	GTP-binding protein 11336:12451 forward MW:41242	Regular	45019300	0	412419609	78	13	37	46.63	269496	204343	103904	0	8	Pass2	PepFrag2	None	27332825	AGAEAANYPFATIDPNVGMVEVPDER	AGAEAANYPFATIDPNVGMVEVPDER	24	26	3.50	1294	2	2	0	0	3367173	61807	Missing	389	1.8	b16b17b18b24y22*	356347	2482	221629458640746	107752972427164	0.0033	Green	31181	27333975	27333943	359166	887	887.00	2.56	3	9118040
NCDO2118_RS00035	GTP-binding protein 11336:12451 forward MW:41242	Regular	45019300	0	412419609	78	13	37	46.63	269496	204343	103904	0	9	Pass2	PepFrag2	None	22101604	AAYHLLGLATYFTAGEKEVR	AAYHLLGLATYFTAGEKEVR	279	20	7.69	1295	2	2	0	0	1120562	57028		123	1.6	b9b20	313552	2063	195926171780229	155926171780229	0.0032	Yellow	38985	22102202	22102168	407932	875	875.00	2.00	2	11056137
NCDO2118_RS00035	GTP-binding protein 11336:12451 forward MW:41242	Regular	45019300	0	412419609	78	13	37	46.63	269496	204343	103904	0	10	Pass2	MissedCleavage	None	20310480	APQMAGIIHTDFEKGFIR	APQMAGIIHTDFEKGFIR	308	18	7.82	1292	0	0	0	0	2574734	60641	Missing	209	2.9	b10*y10	312635	1894	185074371819657	83382914546438	0.0172	Green	30094	20310429	20310453	354094	4643	4643.00	3.00	3	6776858
NCDO2118_RS00035	GTP-binding protein 11336:12451 forward MW:41242	Regular	45019300	0	412419609	78	13	37	46.63	269496	204343	103904	0	11	Pass2	MissedCleavage	None	11266830	KLKPVLEDGK	KLKPVLEDGK	171	10	9.76	1290	2	2	0	0	2007231	59560	Missing	398	2.2	y3y4y10	255509	1096	128518802506381	885188025063809	0.0150	Yellow	25778	11266875	11266896	335131	4047	4047.00	1.81	2	5638474
NCDO2118_RS00035	GTP-binding protein 11336:12451 forward MW:41242	Regular	45019300	0	412419609	78	13	37	46.63	269496	204343	103904	0	12	Pass2	MissedCleavage	None	32225172	EFAATENAEVAVISARVEEEISELEDDEK	EFAATENAEVAVISARVEEEISELEDDEK	231	29	3.53	1291	1	1	0	0	5047097	63564		32	2.4	y8	386096	2938	248005223750989	592020895003958	0.0067	Green	37352	32224765	32224765	390841	1815	1815.00	5.00	5	6453011
NCDO2118_RS00035	GTP-binding protein 11336:12451 forward MW:41242	Regular	45019300	0	412419609	78	13	37	46.63	269496	204343	103904	0	13	Pass2	VarMod	Phosphoryl STY(13)	22901267	AAYHLLGLATYFTAGEKEVR	AAYHLLGLATYFTAGEKEVR	279	20	7.69	1293	2	2	1	0	4971368	63499		160	1.7	y9y10	313552	2063	195926171780229	906174478534861	0.0038	Green	19812	22901257	22901264	308951	1033	1033.00	3.00	3	7640467
NCDO2118_RS00035	GTP-binding protein 11336:12451 forward MW:41242	Regular	45019300	0	412419609	78	13	37	46.63	269496	204343	103904	0	14	Pass2	InSource	None	6844039	GLPNVGK	ALTAGIVGLPNVGK	8	7	10.10	1285	3	3	0	0	12975530	0.0000	Identified	361	0.0	b3y5y6*y7	257872	646	903471892958311	140694378591662	0.0046	Green	13352	6843980	6843999	280109	1231	1231.00	1.00	1	6843980
NCDO2118_RS00035	GTP-binding protein 11336:12451 forward MW:41242	Regular	13064720	0	412419609	33	5	37	11.59	65396	55963	26797	1	1	Pass1	PepFrag1	None	15636908	VEEEISELEDDEK	VEEEISELEDDEK	247	13	3.33	268	18	18	13	5	330157400	76348		16495	5.8	b2b3b4b5b6b10b12b13y2y5y6y7y8y8y9y10y11y11y12y13	246075	1397	151085889207092	111085889207092	0.6672	Green	3795	15636901	15636894	202866	43633	43633.00	2.00	2	7823487
NCDO2118_RS00035	GTP-binding protein 11336:12451 forward MW:41242	Regular	13064720	0	412419609	33	5	37	11.59	65396	55963	26797	0	2	Pass1	PepFrag1	None	12125267	TIDFDEDETK	TIDFDEDETK	184	10	3.43	267	6	6	4	2	40747390	67262		3489	3.1	b2b3y6y7y8y9	184309	1071	126556934911502	865569349115019	0.1527	Yellow	3302	12125273	12125288	178771	9984	9984.00	2.00	2	6067673
NCDO2118_RS00035	GTP-binding protein 11336:12451 forward MW:41242	Regular	13064720	0	412419609	33	5	37	11.59	65396	55963	26797	0	3	Pass1	PepFrag1	None	22101604	AAYHLLGLATYFTAGEKEVR	AAYHLLGLATYFTAGEKEVR	279	20	7.69	270	4	4	0	0	4884698	58049		675	2.3	b4b7y10y20	337527	2063	195926171780229	906174478534861	0.0359	Red	6008	22101636	22101617	351270	2346	2346.00	2.84	3	7373927
NCDO2118_RS00035	GTP-binding protein 11336:12451 forward MW:41242	Regular	13064720	0	412419609	33	5	37	11.59	65396	55963	26797	0	4	Pass2	PepFrag2	None	10074826	ESGVDMLTR	ESGVDMLTR	270	9	4.07	271	4	4	0	0	4459612	57654		6070	2.8	b9y3y7y9	170937	915	113948084834664	187896169669328	0.1310	Red	2483	10074542	10074544	151997	8569	8569.00	1.00	1	10074542
NCDO2118_RS00035	GTP-binding protein 11336:12451 forward MW:41242	Regular	13064720	0	412419609	33	5	37	11.59	65396	55963	26797	0	5	Pass2	PepFrag2	None	16097023	AFDDENVMRENNR	AFDDENVMRENNR	105	13	4.06	269	1	1	0	0	742980	49871		68	1.4	b10	156667	1415	152380920983341	112380920983341	0.0132	Red	4305	16097193	16097181	241919	864	864.00	2.00	2	8053633
NCDO2118_RS00035	GTP-binding protein 11336:12451 forward MW:41242	Regular	48401480	0	412419609	92	15	37	36.66	289578	183434	92582	1	1	Pass1	PepFrag1	None	13097838	ALTAGIVGLPNVGK	ALTAGIVGLPNVGK	1	14	10.10	1051	19	19	15	8	677666200	85159	Identified	29116	7.5	b2b3b3b4b4b5b5b6b6b7b8b9b9y2y3y5y5*y6y7y8y9y10y11y12y12y14	256264	1274	142082062516004	102082062516004	0.2868	Green	12671	13097810	13097834	280235	83056	83056.00	1.96	2	6553941
NCDO2118_RS00035	GTP-binding protein 11336:12451 forward MW:41242	Regular	48401480	0	412419609	92	15	37	36.66	289578	183434	92582	0	2	Pass1	PepFrag1	None	17389262	TVPTTFEFTDIAGIVK	TVPTTFEFTDIAGIVK	62	16	4.07	1053	12	12	5	3	170721900	79171	Identified	35368	7.1	b2b5b6b7b12y1y4y8y9y10y11y12y13y14y16	367295	1640	16813399523446	12813399523446	0.2209	Green	30162	17389309	17389319	360413	63982	63982.00	2.02	2	8699691
NCDO2118_RS00035	GTP-binding protein 11336:12451 forward MW:41242	Regular	48401480	0	412419609	92	15	37	36.66	289578	183434	92582	0	3	Pass1	PepFrag1	None	10906143	AEFLEAIGLK	AEFLEAIGLK	260	10	4.26	1052	12	12	8	4	256633900	80942		9338	4.9	b2b3b4b6b7y3y5y6y7y8y9y9y10	315146	1042	124261935390167	842619353901674	0.1257	Green	18711	10906106	10906133	309421	36396	36396.00	1.90	2	5458089
NCDO2118_RS00035	GTP-binding protein 11336:12451 forward MW:41242	Regular	48401480	0	412419609	92	15	37	36.66	289578	183434	92582	0	4	Pass1	PepFrag1	None	9945568	STLFNAITK	STLFNAITK	15	9	10.10	1049	9	9	6	2	176472200	79315		4805	3.5	b2b3b6b9*y3y4y5y6y7y8y9	229272	940	116014303376569	760143033765691	0.0539	Green	6595	9945509	9945537	242008	15609	15609.00	1.91	2	4977791
NCDO2118_RS00035	GTP-binding protein 11336:12451 forward MW:41242	Regular	48401480	0	412419609	92	15	37	36.66	289578	183434	92582	0	5	Pass1	PepFrag1	None	22101604	AAYHLLGLATYFTAGEKEVR	AAYHLLGLATYFTAGEKEVR	279	20	7.69	1057	6	6	0	1	21467900	70166		1793	4.0	b11b13b19y5y6y7y10y20	330548	2063	195926171780229	155926171780229	0.0351	Green	23295	22101540	22101523	329220	10161	10161.00	2.45	2	11055807
NCDO2118_RS00035	GTP-binding protein 11336:12451 forward MW:41242	Regular	48401480	0	412419609	92	15	37	36.66	289578	183434	92582	0	6	Pass1	PepFrag1	None	12556239	AVTMSYDDLLK	AVTMSYDDLLK	326	11	3.88	1050	5	5	3	0	82153300	75995		3098	3.1	b3b4y3y6y7y8y9	271866	1168	134087469870706	940874698707061	0.0318	Green	9947	12556267	12556292	264856	9217	9217.00	2.00	2	6283170
NCDO2118_RS00035	GTP-binding protein 11336:12451 forward MW:41242	Regular	48401480	0	412419609	92	15	37	36.66	289578	183434	92582	0	7	Pass1	PepFrag1	None	7334355	FLANIR	FLANIR	89	6	11.05	1055	2	2	0	0	3590356	62400		3258	2.1	b3y6	166211	694	947689235915607	149537847183121	0.0201	Green	2920	7334357	7334381	206571	5826	5826.00	1.00	1	7334357
NCDO2118_RS00035	GTP-binding protein 11336:12451 forward MW:41242	Regular	48401480	0	412419609	92	15	37	36.66	289578	183434	92582	0	8	Pass1	PepFrag1	None	20790791	AEFLEAIGLKESGVDMLTR	AEFLEAIGLKESGVDMLTR	260	19	4.16	1056	5	5	1	0	8436827	66110		679	2.3	b6b10b11b17y5y7y10y11	388398	1957	189156027452395	149156027452395	0.0079	Green	37124	20790723	20790714	402516	2282	2282.00	2.44	2	10400398
NCDO2118_RS00035	GTP-binding protein 11336:12451 forward MW:41242	Regular	48401480	0	412419609	92	15	37	36.66	289578	183434	92582	0	9	Pass2	PepFrag2	None	18650756	FLANIREVDAIIHVVR	FLANIREVDAIIHVVR	89	16	7.85	1063	1	1	0	0	933873	56551		53	6.2	y8	331346	1790	178235819866554	491179099332768	0.1525	Yellow	7410	18651198	18651227	247044	44164	44164.00	3.99	4	4670354
NCDO2118_RS00035	GTP-binding protein 11336:12451 forward MW:41242	Regular	48401480	0	412419609	92	15	37	36.66	289578	183434	92582	0	10	Pass2	PepFrag2	None	14408243	MALTAGIVGLPNVGK	MALTAGIVGLPNVGK	0	15	10.10	1054	1	1	0	0	3576866	62384	Identified	260	1.7	b13*y5*y7*y13	301781	1398	151157980769917	111157980769917	0.0046	Green	39799	14408034	14408055	427706	1324	1324.00	2.00	2	7209054
NCDO2118_RS00035	GTP-binding protein 11336:12451 forward MW:41242	Regular	48401480	0	412419609	92	15	37	36.66	289578	183434	92582	0	11	Pass2	MissedCleavage	None	20310480	APQMAGIIHTDFEKGFIR	APQMAGIIHTDFEKGFIR	308	18	7.82	1060	3	3	0	0	7335176	65503	Identified	2719	2.9	b11b12b14b15y6y9y13y14y15y17	326141	1894	185074371819657	83382914546438	0.0174	Green	29205	20310414	20310445	356449	5050	5050.00	2.91	3	6776853
NCDO2118_RS00035	GTP-binding protein 11336:12451 forward MW:41242	Regular	48401480	0	412419609	92	15	37	36.66	289578	183434	92582	0	12	Pass2	MissedCleavage	None	10365574	EVRAWTFK	EVRAWTFK	296	8	10.12	1059	2	2	0	0	8680223	66234		111	1.8	b4b4b7	160639	955	117245238725829	772452387258288	0.0109	Green	2449	10365553	10365580	199089	3144	3144.00	2.00	2	5187813
NCDO2118_RS00035	GTP-binding protein 11336:12451 forward MW:41242	Regular	48401480	0	412419609	92	15	37	36.66	289578	183434	92582	0	13	Pass2	MissedCleavage	None	13887645	GEGLGNKFLANIR	GEGLGNKFLANIR	82	13	10.12	1058	0	0	0	0	4261246	63144		153	1.7	b9*	237485	1302	144156298924752	104156298924752	0.0057	Green	12366	13887626	13887648	278319	1645	1645.00	2.00	2	6948850
NCDO2118_RS00035	GTP-binding protein 11336:12451 forward MW:41242	Regular	48401480	0	412419609	92	15	37	36.66	289578	183434	92582	0	14	Pass2	VarMod	Phosphoryl STY(13)	22901267	AAYHLLGLATYFTAGEKEVR	AAYHLLGLATYFTAGEKEVR	279	20	7.69	1061	4	4	0	1	3257841	61978		846	2.4	b7b11b16-H3PO4y1y5y9y9-H3PO4	330548	2063	195926171780229	906174478534861	0.0093	Green	18779	22901128	22901146	309684	2692	2692.00	2.60	3	7640425
NCDO2118_RS00035	GTP-binding protein 11336:12451 forward MW:41242	Regular	48401480	0	412419609	92	15	37	36.66	289578	183434	92582	0	15	Pass2	VarMod	Phosphoryl STY(10)	18088652	GFIRAVTMSYDDLLK	GFIRAVTMSYDDLLK	322	15	6.84	1062	3	3	0	0	944382	56600		136	1.5	b9b11b13	350790	1623	166970076986799	126970076986799	0.0032	Yellow	35831	18088727	18088733	389621	931	931.00	2.00	2	9049400
NCDO2118_RS00035	GTP-binding protein 11336:12451 forward MW:41242	Regular	48401480	0	412419609	92	15	37	36.66	289578	183434	92582	0	16	Pass2	InSource	None	8064771	LFNAITK	STLFNAITK	17	7	10.10	1049	5	5	2	0	11632350	0.0000		505	0.0	b3b4b5b7y7	229272	774	101918637223401	163837274446801	0.0078	Green	6596	8064732	8064757	242012	2265	2265.00	1.00	1	8064732
NCDO2118_RS00035	GTP-binding protein 11336:12451 forward MW:41242	Regular	48401480	0	412419609	92	15	37	36.66	289578	183434	92582	0	17	Pass2	InSource	None	6844039	GLPNVGK	ALTAGIVGLPNVGK	8	7	10.10	1051	2	2	0	0	18548420	0.0000	Identified	241	0.0	y3y5	256264	646	903471892958311	140694378591662	0.0036	Green	12668	6844038	6844062	280220	1032	1032.00	1.00	1	6844038
NCDO2118_RS00035	GTP-binding protein 11336:12451 forward MW:41242	Regular	48401480	0	412419609	92	15	37	36.66	289578	183434	92582	0	18	Pass2	InSource	None	9535778	GIVGLPNVGK	ALTAGIVGLPNVGK	5	10	10.10	1051	1	1	0	0	4156457	0.0000	Identified	103	0.0	y5	256264	923	114611299011537	189222598023073	0.0028	Green	12666	9535712	9535737	280197	802	802.00	1.00	1	9535712
NCDO2118_RS00035	GTP-binding protein 11336:12451 forward MW:41242	Regular	5349946	0.85	412419609	35	8	37	16.44	64430	57026	11191	1	1	Pass1	PepFrag1	None	13097838	ALTAGIVGLPNVGK	ALTAGIVGLPNVGK	1	14	10.10	1689	10	10	4	2	39332120	63231	Identified	5368	4.9	b3b3b4b5b5b6b6b7b9b9y8y10y11y13y14	267961	1274	142082062516004	102082062516004	0.3979	Green	8991	13097824	13097845	281729	25634	25634.00	1.98	2	6553949
NCDO2118_RS00035	GTP-binding protein 11336:12451 forward MW:41242	Regular	5349946	0.85	412419609	35	8	37	16.44	64430	57026	11191	0	2	Pass1	PepFrag1	None	17389262	TVPTTFEFTDIAGIVK	TVPTTFEFTDIAGIVK	62	16	4.07	1691	9	9	1	0	64732730	65395	Identified	3010	5.0	b2b5b14b16y5y7y9y10y12y14y16	361083	1640	16813399523446	12813399523446	0.3768	Green	21356	17389352	17389350	361138	24274	24274.00	2.02	2	8699713
NCDO2118_RS00035	GTP-binding protein 11336:12451 forward MW:41242	Regular	5349946	0.85	412419609	35	8	37	16.44	64430	57026	11191	0	3	Pass1	PepFrag1	None	10906143	AEFLEAIGLK	AEFLEAIGLK	260	10	4.26	1690	7	7	4	1	19508610	60186		989	2.7	b2b3y2y3y4y5y8y9	317296	1042	124261935390167	842619353901674	0.1105	Green	13240	10906056	10906082	308886	7118	7118.00	2.00	2	5458064
NCDO2118_RS00035	GTP-binding protein 11336:12451 forward MW:41242	Regular	5349946	0.85	412419609	35	8	37	16.44	64430	57026	11191	0	4	Pass1	PepFrag1	None	9945568	STLFNAITK	STLFNAITK	15	9	10.10	1692	2	2	1	0	10461250	57479		268	1.7	y6y7	243422	940	116014303376569	760143033765691	0.0340	Yellow	5086	9945488	9945516	243267	2193	2193.00	2.00	2	4977780
NCDO2118_RS00035	GTP-binding protein 11336:12451 forward MW:41242	Regular	5349946	0.85	412419609	35	8	37	16.44	64430	57026	11191	0	5	Pass1	PepFrag1	None	12556239	AVTMSYDDLLK	AVTMSYDDLLK	326	11	3.88	1688	1	1	0	0	9929030	57253		254	1.5	y8y9	271471	1168	134087469870706	940874698707061	0.0218	Yellow	7231	12556262	12556285	266590	1404	1404.00	2.00	2	6283167
NCDO2118_RS00035	GTP-binding protein 11336:12451 forward MW:41242	Regular	5349946	0.85	412419609	35	8	37	16.44	64430	57026	11191	0	6	Pass2	MissedCleavage	None	38080307	VLKSLFLLTSKPVLYVANVSEDEVGEPDNIEYVK	VLKSLFLLTSKPVLYVANVSEDEVGEPDNIEYVK	194	34	4.13	1693	0	0	0	0	2742034	51664	Missing	150	2.0	b13y6*y13	429189	3613	284667754269235	149778502846157	0.0151	Red	26830	38080327	38080151	401787	971	971.00	3.00	3	12700158
NCDO2118_RS00035	GTP-binding protein 11336:12451 forward MW:41242	Regular	5349946	0.85	412419609	35	8	37	16.44	64430	57026	11191	0	7	Pass2	VarMod	Phosphoryl STY(4)	15207906	MALTAGIVGLPNVGK	MALTAGIVGLPNVGK	0	15	10.10	1694	5	5	0	1	4285598	53604	Identified	935	1.9	b7-H3PO4b10b12b14*y5y5*y10y14	310639	1398	151157980769917	111157980769917	0.0292	Yellow	25562	15207869	15207880	391378	1884	1884.00	2.29	2	7608971
NCDO2118_RS00035	GTP-binding protein 11336:12451 forward MW:41242	Regular	5349946	0.85	412419609	35	8	37	16.44	64430	57026	11191	0	8	Pass2	VarMod	Phosphoryl STY(1)	17288568	TAKDKDAVAEFNVLK	TAKDKDAVAEFNVLK	156	15	7.03	1695	1	1	0	0	2165524	50639		217	1.5	b13-H3PO4y7*y11	198614	1555	162273111312066	122273111312066	0.0148	Red	25115	17288543	17288542	388288	952	952.00	2.00	2	8649308
NCDO2118_RS00035	GTP-binding protein 11336:12451 forward MW:41242	Regular	4235675	0.99	412419609	27	9	37	22.37	231290	48517	95025	1	1	Pass1	PepFrag1	None	10074826	ESGVDMLTR	ESGVDMLTR	270	9	4.07	1170	10	10	8	2	157562900	68244		24171	5.0	b2b2b3b3b4b5y2y3y4y5y5y6y7y8y8y9	198249	915	113948084834664	739480848346641	0.1877	Green	4803	10074746	10074765	188220	43421	43421.00	1.95	2	5042409
NCDO2118_RS00035	GTP-binding protein 11336:12451 forward MW:41242	Regular	4235675	0.99	412419609	27	9	37	22.37	231290	48517	95025	0	2	Pass1	PepFrag1	None	15577730	APQMAGIIHTDFEK	APQMAGIIHTDFEK	308	14	5.22	1175	1	1	0	0	1861259	48967	Missing	157	2.2	b8b10*	212623	1439	154099121719543	114099121719543	0.0123	Red	6621	15577726	15577726	213159	2835	2835.00	2.29	2	7793900
NCDO2118_RS00035	GTP-binding protein 11336:12451 forward MW:41242	Regular	4235675	0.99	412419609	27	9	37	22.37	231290	48517	95025	0	3	Pass1	PepFrag1	None	12125267	TIDFDEDETK	TIDFDEDETK	184	10	3.43	1174	1	1	0	0	540830	43600		567	1.8	y7y10	212556	1071	126556934911502	865569349115019	0.0098	Red	2654	12125334	12125348	158273	2261	2261.00	2.00	2	6067703
NCDO2118_RS00035	GTP-binding protein 11336:12451 forward MW:41242	Regular	4235675	0.99	412419609	27	9	37	22.37	231290	48517	95025	0	4	Pass1	PepFrag1	None	16778442	EFAATENAEVAVISAR	EFAATENAEVAVISAR	231	16	3.96	1171	2	2	0	0	2162221	49618		164	1.7	b7b9b11*y10	248100	1541	161297657411125	121297657411125	0.0057	Yellow	9204	16778550	16778543	251712	1314	1314.00	2.00	2	8394311
NCDO2118_RS00035	GTP-binding protein 11336:12451 forward MW:41242	Regular	4235675	0.99	412419609	27	9	37	22.37	231290	48517	95025	0	5	Pass1	PepFrag1	None	15586842	EYVGQDGDIMEFR	EYVGQDGDIMEFR	355	13	3.59	1172	4	4	0	0	3872280	52149		420	1.5	b10y4y8y11	268197	1387	15036402466178	11036402466178	0.0046	Yellow	9393	15586847	15586847	255818	1071	1071.00	2.00	2	7798460
NCDO2118_RS00035	GTP-binding protein 11336:12451 forward MW:41242	Regular	4235675	0.99	412419609	27	9	37	22.37	231290	48517	95025	0	6	Pass2	PepFrag2	None	7334355	FLANIR	FLANIR	89	6	11.05	1173	4	4	1	0	4374304	52678		66265	4.0	b5b6y2y5*y6	159751	694	947689235915607	149537847183121	0.7496	Yellow	1670	7334411	7334426	138257	173378	173378.00	1.01	1	7334411
NCDO2118_RS00035	GTP-binding protein 11336:12451 forward MW:41242	Regular	4235675	0.99	412419609	27	9	37	22.37	231290	48517	95025	0	7	Pass2	PepFrag2	None	10964728	AFDDENVMR	AFDDENVMR	105	9	3.70	1178	2	2	0	0	1191330	47030		1057	1.7	y5y6y9	202030	966	118143831644999	781438316449989	0.0089	Red	7287	10964437	10964454	221840	2058	2058.00	2.00	2	5487255
NCDO2118_RS00035	GTP-binding protein 11336:12451 forward MW:41242	Regular	4235675	0.99	412419609	27	9	37	22.37	231290	48517	95025	0	8	Pass2	VarMod	Phosphoryl STY(*)	18088652	GFIRAVTMSYDDLLK	GFIRAVTMSYDDLLK	322	15	6.84	1177	0	0	0	0	2702083	50586		577	1.9	b13b13-H3PO4y11-H3PO4	291794	1623	166970076986799	126970076986799	0.0083	Yellow	10818	18088651	18088635	291083	1921	1921.00	2.25	2	9049362
NCDO2118_RS00035	GTP-binding protein 11336:12451 forward MW:41242	Regular	4235675	0.99	412419609	27	9	37	22.37	231290	48517	95025	0	9	Pass2	VarMod	Phosphoryl STY(7)	18088652	GFIRAVTMSYDDLLK	GFIRAVTMSYDDLLK	322	15	6.84	1176	1	1	0	0	1283247	47352		363	1.6	b8y9	291794	1623	166970076986799	713133846578658	0.0046	Red	5529	18088542	18088564	197871	1053	1053.00	3.00	3	6036229
NCDO2118_RS00035	GTP-binding protein 11336:12451 forward MW:41242	Regular	4235675	0.99	412419609	27	9	37	22.37	231290	48517	95025	0	10	Pass2	InSource	None	7914080	GVDMLTR	ESGVDMLTR	272	7	7.00	1170	2	2	0	0	7543871	0.0000		1284	0.0	y4y7	198249	733	982868954262199	15657379085244	0.0086	Green	4797	7914118	7914132	188171	1978	1978.00	1.00	1	7914118
NCDO2118_RS00035	GTP-binding protein 11336:12451 forward MW:41242	Regular	1796777	1.06	412419609	30	9	37	21.29	34345	11291	15166	1	1	Pass1	PepFrag1	None	13487107	DKDAVAEFNVLK	DKDAVAEFNVLK	159	12	4.31	2267	5	5	2	0	29801270	57287		1949	2.5	b4b5b10y5y11y12	249834	1260	141039252514436	101039252514436	0.1447	Green	9645	13487089	13487103	251052	4971	4971.00	2.11	2	6748581
NCDO2118_RS00035	GTP-binding protein 11336:12451 forward MW:41242	Regular	1796777	1.06	412419609	30	9	37	21.29	34345	11291	15166	0	2	Pass1	PepFrag1	None	16778442	EFAATENAEVAVISAR	EFAATENAEVAVISAR	231	16	3.96	2266	7	7	1	1	16737820	54782		640	2.6	b3b3b6b8y3y5y6y10y13y13	253610	1541	161297657411125	121297657411125	0.1186	Yellow	9574	16778505	16778494	250146	4073	4073.00	2.08	2	8394289
NCDO2118_RS00035	GTP-binding protein 11336:12451 forward MW:41242	Regular	1796777	1.06	412419609	30	9	37	21.29	34345	11291	15166	0	3	Pass1	PepFrag1	None	12125267	TIDFDEDETK	TIDFDEDETK	184	10	3.43	2265	2	2	0	0	2159435	45888		617	1.8	y5y10	192545	1071	126556934911502	865569349115019	0.0654	Red	2174	12125314	12125335	157733	2247	2247.00	2.00	2	6067694
NCDO2118_RS00035	GTP-binding protein 11336:12451 forward MW:41242	Regular	1796777	1.06	412419609	30	9	37	21.29	34345	11291	15166	0	4	Pass1	PepFrag1	None	15636908	VEEEISELEDDEK	VEEEISELEDDEK	247	13	3.33	2268	5	5	2	0	1068139	42831		1033	1.5	b2b2b3y7y12y13	218590	1397	151085889207092	607239261380616	0.0291	Red	2795	15636753	15636775	167397	999	999.00	2.75	3	5218966
NCDO2118_RS00035	GTP-binding protein 11336:12451 forward MW:41242	Regular	1796777	1.06	412419609	30	9	37	21.29	34345	11291	15166	0	5	Pass2	PepFrag2	None	12336838	DAVAEFNVLKK	DAVAEFNVLKK	161	11	7.00	2273	0	0	0	0	518518	39693		43	2.1	y10*	236566	1169	13416399289791	941639928979102	0.0916	Red	4789	12336290	12336310	192495	3147	3147.00	2.00	2	6173181
NCDO2118_RS00035	GTP-binding protein 11336:12451 forward MW:41242	Regular	1796777	1.06	412419609	30	9	37	21.29	34345	11291	15166	0	6	Pass2	MissedCleavage	None	13127583	LKPVLEDGKSAR	LKPVLEDGKSAR	172	12	9.88	2271	3	3	0	0	6798398	50869	Missing	8354	3.4	b3b10y8y9y12	164438	1249	140217190104078	100217190104078	0.3380	Yellow	3085	13127599	13127615	170741	11609	11609.00	2.00	2	6568836
NCDO2118_RS00035	GTP-binding protein 11336:12451 forward MW:41242	Regular	1796777	1.06	412419609	30	9	37	21.29	34345	11291	15166	0	7	Pass2	MissedCleavage	None	11266830	KLKPVLEDGK	KLKPVLEDGK	171	10	9.76	2270	5	5	0	1	11257600	53059	Identified	1981	2.0	b1b9y5y7y9	169214	1096	128518802506381	885188025063809	0.0931	Yellow	3967	11266734	11266759	182453	3196	3196.00	2.00	2	5638404
NCDO2118_RS00035	GTP-binding protein 11336:12451 forward MW:41242	Regular	1796777	1.06	412419609	30	9	37	21.29	34345	11291	15166	0	8	Pass2	MissedCleavage	None	12968249	LNKLTELIKPK	LNKLTELIKPK	50	11	10.32	2269	0	0	0	0	524312	39741	Missing	39	1.7	b3*	219554	1289	143195129239694	103195129239694	0.0538	Red	10433	12968328	12968344	261788	1849	1849.00	2.00	2	6489200
NCDO2118_RS00035	GTP-binding protein 11336:12451 forward MW:41242	Regular	1796777	1.06	412419609	30	9	37	21.29	34345	11291	15166	0	9	Pass2	VarMod	Oxidation M(8)	17448938	GFIRAVTMSYDDLLK	GFIRAVTMSYDDLLK	322	15	6.84	2272	3	3	0	0	5268466	49762		510	2.1	b11y9y15	346061	1623	166970076986799	126970076986799	0.0656	Yellow	12632	17448929	17448911	305505	2254	2254.00	2.00	2	8729501
NCDO2118_RS00035	GTP-binding protein 11336:12451 forward MW:41242	Regular	1553906	1.97	412419609	22	6	37	14.29	33208	17920	13978	1	1	Pass1	PepFrag1	None	13487107	DKDAVAEFNVLK	DKDAVAEFNVLK	159	12	4.31	1999	6	6	1	0	10466910	52112		3641	3.6	b5b8y6y9y10y12	242769	1260	141039252514436	101039252514436	0.3805	Yellow	8635	13487092	13487107	251411	12634	12634.00	2.00	2	6748583
NCDO2118_RS00035	GTP-binding protein 11336:12451 forward MW:41242	Regular	1553906	1.97	412419609	22	6	37	14.29	33208	17920	13978	0	2	Pass1	PepFrag1	None	15636908	VEEEISELEDDEK	VEEEISELEDDEK	247	13	3.33	2001	3	3	0	0	1372477	43289		625	2.2	b5b13y13	226619	1397	151085889207092	607239261380616	0.0902	Red	2934	15636738	15636774	172029	2996	2996.00	2.72	3	5218961
NCDO2118_RS00035	GTP-binding protein 11336:12451 forward MW:41242	Regular	1553906	1.97	412419609	22	6	37	14.29	33208	17920	13978	0	3	Pass1	PepFrag1	None	16778442	EFAATENAEVAVISAR	EFAATENAEVAVISAR	231	16	3.96	2000	8	8	4	0	27065870	56238		510	2.1	b13y4y6y9y10y11y12y13	252183	1541	161297657411125	121297657411125	0.0690	Yellow	8554	16778442	16778431	249859	2290	2290.00	2.00	2	8394257
NCDO2118_RS00035	GTP-binding protein 11336:12451 forward MW:41242	Regular	1553906	1.97	412419609	22	6	37	14.29	33208	17920	13978	0	4	Pass2	MissedCleavage	None	13127583	LKPVLEDGKSAR	LKPVLEDGKSAR	172	12	9.88	2003	4	4	0	0	14089870	53403	Missing	8832	3.5	b8b10y8y12	168588	1249	140217190104078	100217190104078	0.3759	Yellow	2881	13127545	13127561	171082	12483	12483.00	2.04	2	6568809
NCDO2118_RS00035	GTP-binding protein 11336:12451 forward MW:41242	Regular	1553906	1.97	412419609	22	6	37	14.29	33208	17920	13978	0	5	Pass2	MissedCleavage	None	21101179	TVPTTFEFTDIAGIVKGASR	TVPTTFEFTDIAGIVKGASR	62	20	7.03	2002	0	0	0	0	2316294	45562	Missing	30	1.9	y12	310602	1976	190378365724434	869189104829561	0.0403	Red	12404	21101222	21101217	350329	1337	1337.00	2.54	3	7040456
NCDO2118_RS00035	GTP-binding protein 11336:12451 forward MW:41242	Regular	1553906	1.97	412419609	22	6	37	14.29	33208	17920	13978	0	6	Pass2	VarMod	Phosphoryl STY(9)	18188925	TVPTTFEFTDIAGIVK	TVPTTFEFTDIAGIVK	62	16	4.07	2004	1	1	0	0	361610	37497	Identified	340	1.8	b2b8b14-H3PO4	329880	1640	16813399523446	12813399523446	0.0442	Red	9062	18189059	18189035	258263	1468	1468.00	2.00	2	9099566
NCDO2118_RS00035	GTP-binding protein 11336:12451 forward MW:41242	Regular	2335279	2.08	412419609	17	7	37	7.55	142005	17629.5	13195	1	1	Pass1	PepFrag1	None	10074826	ESGVDMLTR	ESGVDMLTR	270	9	4.07	1519	6	6	3	0	88916860	63173		3788	3.0	y2y3y5y7y8y9	172347	915	113948084834664	739480848346641	0.0769	Green	5753	10074805	10074822	187336	10917	10917.00	1.95	2	5042439
NCDO2118_RS00035	GTP-binding protein 11336:12451 forward MW:41242	Regular	2335279	2.08	412419609	17	7	37	7.55	142005	17629.5	13195	0	2	Pass1	PepFrag1	None	12125267	TIDFDEDETK	TIDFDEDETK	184	10	3.43	1518	2	2	1	0	991247	43645		459	1.2	y9y10	182189	1071	126556934911502	865569349115019	0.0059	Red	1872	12125248	12125262	138793	836	836.00	2.00	2	6067661
NCDO2118_RS00035	GTP-binding protein 11336:12451 forward MW:41242	Regular	2335279	2.08	412419609	17	7	37	7.55	142005	17629.5	13195	0	3	Pass2	PepFrag2	None	16778442	EFAATENAEVAVISAR	EFAATENAEVAVISAR	231	16	3.96	1524	1	1	0	0	1079616	44016		94	2.4	b12*y13	271044	1541	161297657411125	121297657411125	0.0235	Red	10178	16778063	16778061	235131	3341	3341.00	2.00	2	8394068
NCDO2118_RS00035	GTP-binding protein 11336:12451 forward MW:41242	Regular	2335279	2.08	412419609	17	7	37	7.55	142005	17629.5	13195	0	4	Pass2	PepFrag2	None	10964728	AFDDENVMR	AFDDENVMR	105	9	3.70	1523	2	2	0	0	4327813	50046		1742	1.9	b4y4*y7*y9y9*	197229	966	118143831644999	781438316449989	0.0200	Yellow	8913	10964371	10964387	221429	2835	2835.00	1.81	2	5487222
NCDO2118_RS00035	GTP-binding protein 11336:12451 forward MW:41242	Regular	2335279	2.08	412419609	17	7	37	7.55	142005	17629.5	13195	0	5	Pass2	MissedCleavage	None	15527741	TIDFDEDETKVLK	TIDFDEDETKVLK	184	13	3.86	1520	1	1	0	0	3152762	48670		33	2.5	b11	257191	1435	153813422202609	113813422202609	0.0322	Red	10909	15527568	15527572	244618	4569	4569.00	2.00	2	7768821
NCDO2118_RS00035	GTP-binding protein 11336:12451 forward MW:41242	Regular	2335279	2.08	412419609	17	7	37	7.55	142005	17629.5	13195	0	6	Pass2	VarMod	Oxidation M(6)	10234775	ESGVDMLTR	ESGVDMLTR	270	9	4.07	1521	5	5	1	0	26816580	57967		6985	7.2	b3b8b9b9y4y5y7y9	172347	915	113948084834664	187896169669328	0.8306	Green	2984	10234761	10234764	157009	117946	117946.00	1.36	1	10234761
NCDO2118_RS00035	GTP-binding protein 11336:12451 forward MW:41242	Regular	2335279	2.08	412419609	17	7	37	7.55	142005	17629.5	13195	0	7	Pass2	VarMod	Phosphoryl STY(*)	18088652	GFIRAVTMSYDDLLK	GFIRAVTMSYDDLLK	322	15	6.84	1522	0	0	0	0	1160868	44331		94	1.8	y6y8	369594	1623	166970076986799	713133846578658	0.0110	Red	6535	18088586	18088621	195883	1561	1561.00	3.00	3	6036244
NCDO2118_RS00035	GTP-binding protein 11336:12451 forward MW:41242	Regular	2107617	3.91	412419609	13	7	37	6.20	139088	5968.5	5870	1	1	Pass1	PepFrag1	None	12556239	AVTMSYDDLLK	AVTMSYDDLLK	326	11	3.88	876	6	6	3	2	66705620	61480		920	1.8	b2b3y5y7y8y9	258822	1168	134087469870706	940874698707061	0.0153	Green	7041	12556159	12556180	269034	2126	2126.00	2.00	2	6283116
NCDO2118_RS00035	GTP-binding protein 11336:12451 forward MW:41242	Regular	2107617	3.91	412419609	13	7	37	6.20	139088	5968.5	5870	0	2	Pass1	PepFrag1	None	13487107	DKDAVAEFNVLK	DKDAVAEFNVLK	159	12	4.31	878	0	0	0	0	1329077	44473		31	1.8	y5*	235867	1260	141039252514436	540261683429571	0.0133	Red	3341	13487002	13487064	211845	1853	1853.00	3.00	3	4502382
NCDO2118_RS00035	GTP-binding protein 11336:12451 forward MW:41242	Regular	2107617	3.91	412419609	13	7	37	6.20	139088	5968.5	5870	0	3	Pass2	PepFrag2	None	11055888	DAVAEFNVLK	DAVAEFNVLK	161	10	4.07	877	0	0	0	0	1510769	45030		572	1.3	b10y7*	269867	1034	123625101174992	836251011749922	0.0067	Red	3619	11055999	11056024	217750	932	932.00	2.00	2	5533036
NCDO2118_RS00035	GTP-binding protein 11336:12451 forward MW:41242	Regular	2107617	3.91	412419609	13	7	37	6.20	139088	5968.5	5870	0	4	Pass2	PepFrag2	None	15586842	EYVGQDGDIMEFR	EYVGQDGDIMEFR	355	13	3.59	882	1	1	0	0	1315973	44430		33	1.4	y7	263938	1387	15036402466178	11036402466178	0.0063	Red	8537	15587016	15587022	297757	878	878.00	2.00	2	7798544
NCDO2118_RS00035	GTP-binding protein 11336:12451 forward MW:41242	Regular	2107617	3.91	412419609	13	7	37	6.20	139088	5968.5	5870	0	5	Pass2	MissedCleavage	None	13887645	GEGLGNKFLANIR	GEGLGNKFLANIR	82	13	10.12	879	1	1	0	0	991817	43202		337	7.8	b7b7	230618	1302	144156298924752	104156298924752	0.7140	Red	7440	13887613	13887629	277185	99302	99302.00	2.02	2	6948843
NCDO2118_RS00035	GTP-binding protein 11336:12451 forward MW:41242	Regular	2107617	3.91	412419609	13	7	37	6.20	139088	5968.5	5870	0	6	Pass2	MissedCleavage	None	17288989	GFIRAVTMSYDDLLK	GFIRAVTMSYDDLLK	322	15	6.84	880	0	0	0	0	2264136	46787		66	1.4	b10y6	327176	1623	166970076986799	126970076986799	0.0060	Red	9420	17289173	17289169	314528	830	830.00	2.00	2	8649623
NCDO2118_RS00035	GTP-binding protein 11336:12451 forward MW:41242	Regular	2107617	3.91	412419609	13	7	37	6.20	139088	5968.5	5870	0	7	Pass2	VarMod	Phosphoryl STY(20)	28943794	ESGVDMLTRAAYHLLGLATYFTAGEK	ESGVDMLTRAAYHLLGLATYFTAGEK	270	26	5.35	881	5	5	1	0	4232547	49504		3911	6.7	b9b26y12y18y19y26	374266	2616	229536344321096	113024229547398	0.2385	Red	11357	28943701	28943629	363774	33167	33167.00	2.88	3	9654615
NCDO2118_RS00065	peptidyl-tRNA hydrolase 16817:17383 forward MW:20963	Regular	2221579	2.1	209632221	22	5	17	8.51	185852	196575	44759	1	1	Pass1	PepFrag1	None	7114763	AVAPLLK	AVAPLLK	72	7	10.10	2440	10	10	7	3	48427690	60318	Identified	39939	6.0	b2b3b4b5b6b7y1y2y3y7	191455	712	964005762446893	152801152489379	0.6902	Green	6149	7114756	7114772	225018	128269	128269.00	1.04	1	7114756
NCDO2118_RS00065	peptidyl-tRNA hydrolase 16817:17383 forward MW:20963	Regular	2221579	2.1	209632221	22	5	17	8.51	185852	196575	44759	0	2	Pass1	PepFrag1	None	10205360	EIAQDGIFK	EIAQDGIFK	157	9	4.07	2441	3	3	0	0	3634879	49072		252	1.8	b5b7y6y9	224270	947	116589548425828	193179096851656	0.0150	Red	7736	10205329	10205334	243489	2781	2781.00	1.24	1	10205329
NCDO2118_RS00065	peptidyl-tRNA hydrolase 16817:17383 forward MW:20963	Regular	2221579	2.1	209632221	22	5	17	8.51	185852	196575	44759	0	3	Pass2	PepFrag2	None	11005769	MIVGLGNPGDK	MIVGLGNPGDK	3	11	6.78	2444	1	1	0	0	4177183	49675	Missing	2540	5.4	y8y11	190216	1033	123545381615726	835453816157263	0.2351	Red	3288	11005751	11005774	189646	43701	43701.00	2.00	2	5507912
NCDO2118_RS00065	peptidyl-tRNA hydrolase 16817:17383 forward MW:20963	Regular	2221579	2.1	209632221	22	5	17	8.51	185852	196575	44759	0	4	Pass2	VarMod	Oxidation M(14)	16518360	EIAQDGIFKAVDAMK	EIAQDGIFKAVDAMK	157	15	4.31	2443	4	4	0	0	3133234	48427		430	3.1	b5b8*b8b12*b14y6y8y13	252942	1536	160948565892464	672990439283094	0.0378	Red	5270	16518227	16518256	215193	7029	7029.00	2.96	3	5512791
NCDO2118_RS00065	peptidyl-tRNA hydrolase 16817:17383 forward MW:20963	Regular	2221579	2.1	209632221	22	5	17	8.51	185852	196575	44759	0	5	Pass2	VarMod	Oxidation M(1)	15367726	MIVGLGNPGDKYEK	MIVGLGNPGDKYEK	3	14	6.95	2442	4	4	1	0	4526305	50024	Identified	1598	2.5	b10b11b14y7y10y11	184131	1418	152596224342789	617308162285258	0.0219	Red	6853	15367818	15367851	234170	4072	4072.00	2.78	3	5129321
NCDO2118_RS00065	peptidyl-tRNA hydrolase 16817:17383 forward MW:20963	Regular	2996836	2.55	209632221	29	8	17	30.85	69744	20429	7631	1	1	Pass1	PepFrag1	None	7114763	AVAPLLK	AVAPLLK	72	7	10.10	5611	8	8	5	3	22992500	58382	Identified	3810	3.2	b3b4b5b6y1y2y3y7	181344	712	964005762446893	152801152489379	0.2325	Yellow	3615	7114750	7114769	216144	16216	16216.00	1.00	1	7114750
NCDO2118_RS00065	peptidyl-tRNA hydrolase 16817:17383 forward MW:20963	Regular	2996836	2.55	209632221	29	8	17	30.85	69744	20429	7631	0	2	Pass1	PepFrag1	None	20129998	EEKPFMSLVASTFVNGEK	EEKPFMSLVASTFVNGEK	39	18	4.56	5610	3	3	0	0	6275846	52743	Missing	734	2.6	b10y3y3y8y8y9y14y16	316369	1865	183180338952267	143180338952267	0.0487	Red	22012	20130100	20130082	318286	3394	3394.00	2.06	2	10070086
NCDO2118_RS00065	peptidyl-tRNA hydrolase 16817:17383 forward MW:20963	Regular	2996836	2.55	209632221	29	8	17	30.85	69744	20429	7631	0	3	Pass1	PepFrag1	None	17519513	LFLVKPLTFMNESGR	LFLVKPLTFMNESGR	57	15	10.12	5609	1	1	0	0	1772726	47253	Missing	463	1.4	b2y8*	322983	1663	169702328105566	129702328105566	0.0117	Red	16553	17519488	17519488	295029	819	819.00	2.00	2	8764781
NCDO2118_RS00065	peptidyl-tRNA hydrolase 16817:17383 forward MW:20963	Regular	2996836	2.55	209632221	29	8	17	30.85	69744	20429	7631	0	4	Pass1	PepFrag1	None	19989338	HGMTVVNHVLSGFDNEDK	HGMTVVNHVLSGFDNEDK	139	18	5.11	5608	6	6	1	1	14605650	56412		400	1.5	b5b6b9*b10b11*y4y8y14	275165	1814	179825450101811	139825450101811	0.0110	Yellow	12564	19989439	19989423	275992	764	764.00	2.37	2	9999756
NCDO2118_RS00065	peptidyl-tRNA hydrolase 16817:17383 forward MW:20963	Regular	2996836	2.55	209632221	29	8	17	30.85	69744	20429	7631	0	5	Pass2	MissedCleavage	None	16898815	TKHNMGFMALDLLAK	TKHNMGFMALDLLAK	17	15	9.88	5612	5	5	0	0	8330234	53973		1440	5.2	b5b9b15y1y7y11y15	372020	1605	165733254506207	125733254506207	0.4102	Red	34396	16898700	16898703	374258	28607	28607.00	2.01	2	8454386
NCDO2118_RS00065	peptidyl-tRNA hydrolase 16817:17383 forward MW:20963	Regular	2996836	2.55	209632221	29	8	17	30.85	69744	20429	7631	0	6	Pass2	VarMod	Oxidation M(*)	14767549	MTKMIVGLGNPGDK	MTKMIVGLGNPGDK	0	14	9.88	5614	2	2	0	0	1790861	47297	Missing	195	3.7	b6b7b8	192660	1385	150219443854905	110219443854905	0.1780	Red	40157	14767424	14767436	419836	12412	12412.00	2.00	2	7388748
NCDO2118_RS00065	peptidyl-tRNA hydrolase 16817:17383 forward MW:20963	Regular	2996836	2.55	209632221	29	8	17	30.85	69744	20429	7631	0	7	Pass2	VarMod	Oxidation M(6)	14767338	HNMGFMALDLLAK	HNMGFMALDLLAK	19	13	7.82	5613	2	2	0	0	951587	44551		371	2.8	b4b12*y5y12y12	378361	1377	1496404231783	1096404231783	0.0859	Red	25158	14767380	14767392	332356	5990	5990.00	2.00	2	7388726
NCDO2118_RS00065	peptidyl-tRNA hydrolase 16817:17383 forward MW:20963	Regular	2996836	2.55	209632221	29	8	17	30.85	69744	20429	7631	0	8	Pass2	VarMod	Oxidation M(10)	27363886	IGIGRPKHGMTVVNHVLSGFDNEDK	IGIGRPKHGMTVVNHVLSGFDNEDK	132	25	7.94	5615	2	2	0	0	2447310	48654	Missing	218	2.2	b6b12b25	218400	2531	224536904430291	109691269620194	0.0221	Red	28772	27363861	27363829	348183	1542	1542.00	3.00	3	9128002
NCDO2118_RS00090	hypothetical protein 22289:22612 forward MW:12342	Regular	3308179	1.46	123420676	8	4	7	32.71	11797	10134	1940	1	1	Pass1	PepFrag1	None	20360659	VQIGDLIGVEISNIHEDGK	VQIGDLIGVEISNIHEDGK	52	19	4.06	4903	4	4	0	0	18630270	57898		1423	2.6	b3b5b6*b7b19y9y9*y12y13y17	328584	1910	186115215291643	840768101944288	0.2863	Yellow	20723	20360700	20360707	330730	3378	3378.00	2.82	3	6793615
NCDO2118_RS00090	hypothetical protein 22289:22612 forward MW:12342	Regular	3308179	1.46	123420676	8	4	7	32.71	11797	10134	1940	0	2	Pass2	MissedCleavage	None	18520150	MIGQVENITRFGLFVK	MIGQVENITRFGLFVK	0	16	10.12	4904	0	0	0	0	2729102	49556		112	1.8	b11*y9	348292	1767	17670574411327	778038294088466	0.1279	Red	24414	18520003	18520020	349456	1509	1509.00	3.00	3	6180050
NCDO2118_RS00090	hypothetical protein 22289:22612 forward MW:12342	Regular	3308179	1.46	123420676	8	4	7	32.71	11797	10134	1940	0	3	Pass2	VarMod	Oxidation M(1)	18680099	MIGQVENITRFGLFVK	MIGQVENITRFGLFVK	0	16	10.12	4905	3	3	0	1	10498060	55407		159	2.6	b8b11y5y12	348292	1767	17670574411327	778038294088466	0.3531	Yellow	7957	18680081	18680097	253635	4165	4165.00	2.83	3	6233409
NCDO2118_RS00090	hypothetical protein 22289:22612 forward MW:12342	Regular	3308179	1.46	123420676	8	4	7	32.71	11797	10134	1940	0	4	Pass2	VarMod	Phosphoryl STY(2)	12105827	LTELEQKNR	LTELEQKNR	95	9	7.11	4906	1	1	0	0	623638	43145		246	1.8	b7y3*	70895	1052	125055691135092	850556911350921	0.2327	Red	18899	12105858	12105880	320974	2745	2745.00	2.00	2	6057965
NCDO2118_RS00100	tRNA(Ile)-lysidine synthetase 24096:25367 forward MW:49545	Regular	4168770	1.09	496023910	33	11	48	13.95	122177	11931	20288	1	1	Pass1	PepFrag1	None	19089185	ENPQFSQSISDLSSEIK	ENPQFSQSISDLSSEIK	200	17	3.83	2640	11	11	2	2	70781770	64699	Identified	3144	2.9	b5b7b8b10b13b16y1y5y6y8y9y10y10y11*y12y14y14y15y17	259396	1730	174230307433588	134230307433588	0.0413	Green	17555	19089199	19089172	284160	5046	5046.00	2.08	2	9549636
NCDO2118_RS00100	tRNA(Ile)-lysidine synthetase 24096:25367 forward MW:49545	Regular	4168770	1.09	496023910	33	11	48	13.95	122177	11931	20288	0	2	Pass1	PepFrag1	None	10745830	ENPLIFVDK	ENPLIFVDK	371	9	4.07	2639	4	4	1	1	40360370	62260	Identified	605	1.9	b2y4y5y7	265429	1009	121624316229686	816243162296861	0.0238	Green	16037	10745780	10745804	268438	2908	2908.00	2.00	2	5377926
NCDO2118_RS00100	tRNA(Ile)-lysidine synthetase 24096:25367 forward MW:49545	Regular	4168770	1.09	496023910	33	11	48	13.95	122177	11931	20288	0	3	Pass2	PepFrag2	None	20370135	ENPQFSQSISDLSSEIKK	ENPQFSQSISDLSSEIKK	200	18	4.44	2646	3	3	0	0	5151498	53319	Identified	12035	8.3	b6b10*b13*b18y16y16*y16y18	241495	1865	183180338952267	143180338952267	0.7072	Yellow	18778	20369783	20369743	299501	86400	86400.00	2.15	2	10189928
NCDO2118_RS00100	tRNA(Ile)-lysidine synthetase 24096:25367 forward MW:49545	Regular	4168770	1.09	496023910	33	11	48	13.95	122177	11931	20288	0	4	Pass2	PepFrag2	None	9584516	FTGEFTEK	FTGEFTEK	87	8	4.26	2642	3	3	1	0	5142130	53312		2102	2.8	y5y7y8	175014	857	109080431890802	690804318908022	0.0822	Yellow	6498	9584614	9584640	190650	10042	10042.00	1.91	2	4797343
NCDO2118_RS00100	tRNA(Ile)-lysidine synthetase 24096:25367 forward MW:49545	Regular	4168770	1.09	496023910	33	11	48	13.95	122177	11931	20288	0	5	Pass2	PepFrag2	None	8334767	VPIYVDK	VPIYVDK	80	7	6.78	2649	1	1	0	0	370395	41887	Missing	34	1.8	b5	172071	791	103405575623436	166811151246872	0.0286	Red	6099	8334596	8334610	186694	3499	3499.00	1.34	1	8334596
NCDO2118_RS00100	tRNA(Ile)-lysidine synthetase 24096:25367 forward MW:49545	Regular	4168770	1.09	496023910	33	11	48	13.95	122177	11931	20288	0	6	Pass2	PepFrag2	None	8324240	EFYFVK	EFYFVK	290	6	6.89	2648	1	1	0	0	966273	46051		35	1.4	y4	234304	760	100685909104663	606859091046631	0.0168	Red	4847	8324266	8324294	176168	2053	2053.00	2.00	2	4167169
NCDO2118_RS00100	tRNA(Ile)-lysidine synthetase 24096:25367 forward MW:49545	Regular	4168770	1.09	496023910	33	11	48	13.95	122177	11931	20288	0	7	Pass2	PepFrag2	None	12936474	IVKDEHYFDK	IVKDEHYFDK	10	10	5.28	2641	2	2	0	0	770670	45069		285	1.7	b6b10y2y3y8	158869	1184	135309234100625	953092341006245	0.0155	Red	8361	12936595	12936612	205443	1893	1893.00	2.00	2	6473334
NCDO2118_RS00100	tRNA(Ile)-lysidine synthetase 24096:25367 forward MW:49545	Regular	4168770	1.09	496023910	33	11	48	13.95	122177	11931	20288	0	8	Pass2	PepFrag2	None	36367625	ENSIEIVSENPQDESFMEVYLPLEGEIEIRK	ENSIEIVSENPQDESFMEVYLPLEGEIEIRK	310	31	3.67	2647	1	1	0	0	1512750	47998	Identified	101	1.9	b8b10*y8	406877	3353	270841578638703	140561052425802	0.0073	Red	23157	36367285	36367067	419484	896	896.00	3.00	3	12129143
NCDO2118_RS00100	tRNA(Ile)-lysidine synthetase 24096:25367 forward MW:49545	Regular	4168770	1.09	496023910	33	11	48	13.95	122177	11931	20288	0	9	Pass2	VarMod	Carbamidomethyl C(10);Phosphoryl STY(11)	17178594	KLYAIVGLACSDLSK	KLYAIVGLACSDLSK	380	15	8.85	2645	4	4	0	0	4287105	52522		1306	3.0	b13y6y10y15	327317	1517	1596185475844	1196185475844	0.0519	Yellow	14246	17178709	17178699	252846	6337	6337.00	2.00	2	8594391
NCDO2118_RS00100	tRNA(Ile)-lysidine synthetase 24096:25367 forward MW:49545	Regular	4168770	1.09	496023910	33	11	48	13.95	122177	11931	20288	0	10	Pass2	VarMod	Phosphoryl STY(2);Phosphoryl STY(4)	18057257	DSMTLFNWLYDLK	DSMTLFNWLYDLK	32	13	3.88	2643	0	0	0	0	1470089	47874		450	1.9	b9-2(H3PO4)y10-H3PO4y11*y13-2(H3PO4)	403340	1514	159408038416549	119408038416549	0.0179	Red	17538	18057257	18057240	284007	2185	2185.00	2.29	2	9033665
NCDO2118_RS00100	tRNA(Ile)-lysidine synthetase 24096:25367 forward MW:49545	Regular	4168770	1.09	496023910	33	11	48	13.95	122177	11931	20288	0	11	Pass2	VarMod	Phosphoryl STY(6)	12705755	TKDFFYLEK	TKDFFYLEK	296	9	6.95	2644	3	3	0	0	5887971	53900		191	1.2	b4b7y3	281120	1098	128675103901693	88675103901693	0.0075	Yellow	7713	12705706	12705724	200239	918	918.00	2.00	2	6357889
NCDO2118_RS00100	tRNA(Ile)-lysidine synthetase 24096:25367 forward MW:49545	Regular	1578946	1.76	496023910	8	6	48	8.27	27265	6427	2282	1	1	Pass1	PepFrag1	None	10745830	ENPLIFVDK	ENPLIFVDK	371	9	4.07	2374	2	2	0	0	26634040	56238	Identified	261	1.9	b4y4y7	265036	1009	121624316229686	816243162296861	0.1034	Green	10931	10745851	10745877	269442	2819	2819.00	2.00	2	5377962
NCDO2118_RS00100	tRNA(Ile)-lysidine synthetase 24096:25367 forward MW:49545	Regular	1578946	1.76	496023910	8	6	48	8.27	27265	6427	2282	0	2	Pass1	PepFrag1	None	19089185	ENPQFSQSISDLSSEIK	ENPQFSQSISDLSSEIK	200	17	3.83	2375	5	5	2	0	24282610	55837	Identified	1419	2.2	b9y8y11y11*y13y14y15y15	265399	1730	174230307433588	134230307433588	0.0890	Yellow	11714	19089186	19089151	284934	2427	2427.00	2.00	2	9549629
NCDO2118_RS00100	tRNA(Ile)-lysidine synthetase 24096:25367 forward MW:49545	Regular	1578946	1.76	496023910	8	6	48	8.27	27265	6427	2282	0	3	Pass1	PepFrag1	None	11876459	LNKEFYFVK	LNKEFYFVK	287	9	9.63	2377	1	1	0	0	781310	40912		86	1.3	y7	257468	1115	129999858357262	899998583572623	0.0433	Red	9102	11876367	11876389	243237	1181	1181.00	2.00	2	5943220
NCDO2118_RS00100	tRNA(Ile)-lysidine synthetase 24096:25367 forward MW:49545	Regular	1578946	1.76	496023910	8	6	48	8.27	27265	6427	2282	0	4	Pass2	PepFrag2	None	12026780	ENPLIFVDKK	ENPLIFVDKK	371	10	7.00	2379	0	0	0	0	395197	37952	Missing	35	2.4	b8*	243919	1144	132244306608506	922443066085059	0.1849	Red	13479	12026387	12026409	333324	5042	5042.00	1.83	2	6018230
NCDO2118_RS00100	tRNA(Ile)-lysidine synthetase 24096:25367 forward MW:49545	Regular	1578946	1.76	496023910	8	6	48	8.27	27265	6427	2282	0	5	Pass2	PepFrag2	None	9584516	FTGEFTEK	FTGEFTEK	87	8	4.26	2376	0	0	0	0	549972	39387		87	2.2	b7	166312	857	109080431890802	690804318908022	0.1845	Red	3740	9584601	9584630	179655	5031	5031.00	2.00	2	4797337
NCDO2118_RS00100	tRNA(Ile)-lysidine synthetase 24096:25367 forward MW:49545	Regular	1578946	1.76	496023910	8	6	48	8.27	27265	6427	2282	0	6	Pass2	VarMod	Carbamidomethyl C(10);Phosphoryl STY(11)	17178594	KLYAIVGLACSDLSK	KLYAIVGLACSDLSK	380	15	8.85	2378	0	0	0	0	1460340	43628		394	3.6	b11-H3PO4b12y8-H3PO4y9-H3PO4y13	293310	1517	1596185475844	1196185475844	0.3948	Red	9893	17178711	17178696	254552	10765	10765.00	2.00	2	8594392
NCDO2118_RS00105	hypoxanthine-guanine phosphoribosyltransferase 25348:25899 forward MW:20648	Regular	30228890	0	207048970	19	2	15	11.48	74922	102846	16949	1	1	Pass1	PepFrag1	None	14718003	DILIVEDIIDTGR	DILIVEDIIDTGR	97	13	3.50	303	16	16	12	6	425529800	81094		14214	5.3	b2b3b4b5b7b8y3y4y5y6y7y8y8y9y9y10y11y13	338599	1396	151013780440696	111013780440696	0.4576	Green	12926	14717994	14718000	379571	34282	34282.00	1.98	2	7364033
NCDO2118_RS00105	hypoxanthine-guanine phosphoribosyltransferase 25348:25899 forward MW:20648	Regular	30228890	0	207048970	19	2	15	11.48	74922	102846	16949	0	2	Pass2	MissedCleavage	None	9905288	MLEKNLDK	MLEKNLDK	0	8	7.00	304	3	3	0	0	15660030	66752		2735	4.7	b4b8y6y8	164122	938	115849685671389	758496856713894	0.5424	Green	2849	9905262	9905291	170647	40640	40640.00	1.93	2	4957668
NCDO2118_RS00105	hypoxanthine-guanine phosphoribosyltransferase 25348:25899 forward MW:20648	Regular	22579640	0	207048970	28	3	15	20.77	96080	121401	45410	1	1	Pass1	PepFrag1	None	10866405	LILDVDTAVK	LILDVDTAVK	85	10	3.88	523	14	14	8	4	318257800	78565		41827	6.5	b2b4b6b7b8b9y1y3y4y5y6y7y8y8y9y10	258303	1059	125609824146261	85609824146261	0.8205	Green	7409	10866423	10866444	258980	78830	78830.00	1.75	2	5438248
NCDO2118_RS00105	hypoxanthine-guanine phosphoribosyltransferase 25348:25899 forward MW:20648	Regular	22579640	0	207048970	28	3	15	20.77	96080	121401	45410	0	2	Pass1	PepFrag1	None	14718003	DILIVEDIIDTGR	DILIVEDIIDTGR	97	13	3.50	524	8	8	5	2	73038120	72173		1056	1.9	b2b3b4b5y6y7y8y9y10	356804	1396	151013780440696	111013780440696	0.0219	Green	13517	14718033	14718037	378727	2104	2104.00	2.00	2	7364053
NCDO2118_RS00105	hypoxanthine-guanine phosphoribosyltransferase 25348:25899 forward MW:20648	Regular	22579640	0	207048970	28	3	15	20.77	96080	121401	45410	0	3	Pass2	VarMod	Phosphoryl STY(*)	18038776	SKELGEILTKEYEGK	SKELGEILTKEYEGK	23	15	4.73	525	6	6	0	0	7133476	62070		2527	4.1	b5b10b11b13b15y8y15	202063	1616	166489636518861	126489636518861	0.1576	Green	11195	18038877	18038854	322039	15146	15146.00	2.05	2	9024475
NCDO2118_RS00105	hypoxanthine-guanine phosphoribosyltransferase 25348:25899 forward MW:20648	Regular	20077460	0	207048970	51	7	15	48.09	218930	174221	101052	1	1	Pass1	PepFrag1	None	9946408	NPLVLGILR	NPLVLGILR	38	9	11.05	1982	9	9	7	3	184190900	75680	Identified	65132	7.4	b2b2*b3b3*b4b4*y4y5y6y7y8y9	335068	983	119525888140019	795258881400194	0.5804	Green	17311	9946349	9946372	320283	127069	127069.00	1.83	2	4978211
NCDO2118_RS00105	hypoxanthine-guanine phosphoribosyltransferase 25348:25899 forward MW:20648	Regular	20077460	0	207048970	51	7	15	48.09	218930	174221	101052	0	2	Pass1	PepFrag1	None	17329632	NLPYVGVLKPEVYNK	NLPYVGVLKPEVYNK	168	15	9.47	1981	10	10	4	0	42904560	69352	Identified	12136	4.9	b7*b8b11*y1y2*y4y4*y5y6y8y9y10y12y13y13y15y15*	257090	1644	168407272831315	128407272831315	0.1126	Green	9370	17329540	17329536	274530	24647	24647.00	2.47	2	8669806
NCDO2118_RS00105	hypoxanthine-guanine phosphoribosyltransferase 25348:25899 forward MW:20648	Regular	20077460	0	207048970	51	7	15	48.09	218930	174221	101052	0	3	Pass1	PepFrag1	None	11736878	GSVPFLAELIK	GSVPFLAELIK	47	11	7.00	1983	6	6	4	0	93420880	72732	Identified	8926	4.3	b3b5y5y6y7y8y9y11	345872	1134	131472525008487	914725250084867	0.1028	Green	27784	11736861	11736881	377687	22505	22505.00	1.77	2	5873467
NCDO2118_RS00105	hypoxanthine-guanine phosphoribosyltransferase 25348:25899 forward MW:20648	Regular	20077460	0	207048970	51	7	15	48.09	218930	174221	101052	0	4	Pass1	PepFrag1	None	10866405	LILDVDTAVK	LILDVDTAVK	85	10	3.88	1980	4	4	1	0	34199520	68367		3971	3.4	b7b8y8y10	262252	1059	125609824146261	85609824146261	0.0634	Green	6922	10866360	10866381	256022	13872	13872.00	1.79	2	5438216
NCDO2118_RS00105	hypoxanthine-guanine phosphoribosyltransferase 25348:25899 forward MW:20648	Regular	20077460	0	207048970	51	7	15	48.09	218930	174221	101052	0	5	Pass2	PepFrag2	None	9025193	ELGEILTK	ELGEILTK	25	8	4.26	1986	2	2	0	0	407917	49133		289	1.3	b5y8	212425	866	109842791715871	179685583431742	0.0055	Red	17215	9025381	9025397	319735	1212	1212.00	1.00	1	9025381
NCDO2118_RS00105	hypoxanthine-guanine phosphoribosyltransferase 25348:25899 forward MW:20648	Regular	20077460	0	207048970	51	7	15	48.09	218930	174221	101052	0	6	Pass2	MissedCleavage	None	18140270	DILIVEDIIDTGRTLK	DILIVEDIIDTGRTLK	97	16	3.97	1985	1	1	0	0	1712440	55363		399	2.5	b9y10y16	376307	1748	175436755267207	135436755267207	0.0172	Yellow	26165	18140089	18140080	368705	3760	3760.00	2.09	2	9075081
NCDO2118_RS00105	hypoxanthine-guanine phosphoribosyltransferase 25348:25899 forward MW:20648	Regular	20077460	0	207048970	51	7	15	48.09	218930	174221	101052	0	7	Pass2	MissedCleavage	Carbamidomethyl C(4)	30223670	HIDCHLETDFMTVSSYHGGTKSSGEVK	HIDCHLETDFMTVSSYHGGTKSSGEVK	58	27	5.75	1984	0	0	0	0	2241891	56533		34	2.9	b10	230636	2683	233439000989883	115626000659922	0.0148	Yellow	7431	30224040	30223987	260584	3234	3234.00	3.00	3	10081395
NCDO2118_RS00105	hypoxanthine-guanine phosphoribosyltransferase 25348:25899 forward MW:20648	Regular	20077460	0	207048970	51	7	15	48.09	218930	174221	101052	0	8	Pass2	InSource	None	9305659	PFLAELIK	GSVPFLAELIK	50	8	7.00	1983	7	7	4	2	61963680	0.0000	Identified	1716	0.0	b2b3b6y4y5y6y7y8	345872	908	113366185315295	733661853152945	0.0284	Green	27798	9305603	9305626	377754	6217	6217.00	1.53	2	4657838
NCDO2118_RS00105	hypoxanthine-guanine phosphoribosyltransferase 25348:25899 forward MW:20648	Regular	20077460	0	207048970	51	7	15	48.09	218930	174221	101052	0	9	Pass2	InSource	None	6704610	VLGILR	NPLVLGILR	41	6	11.05	1982	4	4	1	1	5084862	0.0000		2756	0.0	b3b4y2y6	335068	673	928473850958121	145694770191624	0.0243	Green	17288	6704573	6704591	320181	5311	5311.00	1.00	1	6704573
NCDO2118_RS00105	hypoxanthine-guanine phosphoribosyltransferase 25348:25899 forward MW:20648	Regular	20077460	0	207048970	51	7	15	48.09	218930	174221	101052	0	10	Pass2	InSource	None	5713926	LGILR	NPLVLGILR	42	5	11.05	1982	2	2	0	0	872469	0.0000		2189	0.0	y2y5	335068	568	829198532217113	125839706443423	0.0233	Green	17296	5713916	5713933	320240	5106	5106.00	1.00	1	5713916
NCDO2118_RS00105	hypoxanthine-guanine phosphoribosyltransferase 25348:25899 forward MW:20648	Regular	20077460	0	207048970	51	7	15	48.09	218930	174221	101052	0	11	Pass2	InSource	None	7835451	LVLGILR	NPLVLGILR	40	7	11.05	1982	1	1	0	0	2842595	0.0000		2101	0.0	y7	335068	797	103927827389527	167855654779053	0.0145	Green	17290	7835426	7835444	320202	3169	3169.00	1.00	1	7835426
NCDO2118_RS00105	hypoxanthine-guanine phosphoribosyltransferase 25348:25899 forward MW:20648	Regular	20077460	0	207048970	51	7	15	48.09	218930	174221	101052	0	12	Pass2	InSource	None	8805979	PLVLGILR	NPLVLGILR	39	8	11.05	1982	5	5	3	1	50660900	0.0000	Missing	1403	0.0	b2y4y5y6y7	335068	887	11161144069031	716114406903103	0.0129	Green	17285	8805960	8805983	320147	2828	2828.00	2.00	2	4408016
NCDO2118_RS00105	hypoxanthine-guanine phosphoribosyltransferase 25348:25899 forward MW:20648	Regular	8936260	0	207048970	13	2	15	11.48	34001	40548	6390	1	1	Pass1	PepFrag1	None	14718003	DILIVEDIIDTGR	DILIVEDIIDTGR	97	13	3.50	1084	11	11	9	3	125795000	70508		5176	3.8	b2b3b4y4y5y6y7y8y9y10y11	342500	1396	151013780440696	111013780440696	0.3975	Green	14518	14718043	14718049	379449	13516	13516.00	2.00	2	7364058
NCDO2118_RS00105	hypoxanthine-guanine phosphoribosyltransferase 25348:25899 forward MW:20648	Regular	8936260	0	207048970	13	2	15	11.48	34001	40548	6390	0	2	Pass2	MissedCleavage	None	9905288	MLEKNLDK	MLEKNLDK	0	8	7.00	1085	2	2	0	0	3834725	55349		1214	3.7	b8y7*y8	160556	938	115849685671389	758496856713894	0.6025	Yellow	2169	9905341	9905370	157681	20485	20485.00	1.95	2	4957707
NCDO2118_RS00105	hypoxanthine-guanine phosphoribosyltransferase 25348:25899 forward MW:20648	Regular	26229200	0	207048970	21	3	15	16.94	112077	166444.5	66209	1	1	Pass1	PepFrag1	None	10866405	LILDVDTAVK	LILDVDTAVK	85	10	3.88	619	17	17	15	7	472233200	80929		65314	7.3	b2b3b4b5b6b7b7b8b9y2y3y4y4y5y6y7y8y8y9y10	255678	1059	125609824146261	85609824146261	0.9827	Green	8301	10866425	10866454	259386	110143	110143.00	1.73	2	5438249
NCDO2118_RS00105	hypoxanthine-guanine phosphoribosyltransferase 25348:25899 forward MW:20648	Regular	26229200	0	207048970	21	3	15	16.94	112077	166444.5	66209	0	2	Pass1	PepFrag1	None	14718003	DILIVEDIIDTGR	DILIVEDIIDTGR	97	13	3.50	620	2	2	0	0	5970131	61948		298	1.3	b3y5y9y12	350454	1396	151013780440696	111013780440696	0.0073	Green	15457	14717924	14717934	378572	820	820.00	2.00	2	7363999
NCDO2118_RS00105	hypoxanthine-guanine phosphoribosyltransferase 25348:25899 forward MW:20648	Regular	26229200	0	207048970	21	3	15	16.94	112077	166444.5	66209	0	3	Pass2	VarMod	Phosphoryl STY(7)	9824856	ELGEILTK	ELGEILTK	25	8	4.26	621	2	2	1	0	4586758	60803		597	1.3	b2b3y3-H3PO4y6-H3PO4	214143	866	109842791715871	179685583431742	0.0099	Green	13256	9824910	9824919	330308	1114	1114.00	1.35	1	9824910
NCDO2118_RS00105	hypoxanthine-guanine phosphoribosyltransferase 25348:25899 forward MW:20648	Regular	26268170	0	207048970	53	9	15	61.75	261769	200790	118259	1	1	Pass1	PepFrag1	None	9946408	NPLVLGILR	NPLVLGILR	38	9	11.05	1747	11	11	6	3	244953100	78085	Identified	79998	7.7	b2b2*b3*b4b4*b6b6*b7y2y4y5y6y7y8y9	338010	983	119525888140019	795258881400194	0.5260	Green	18495	9946435	9946461	318787	137702	137702.00	1.81	2	4978254
NCDO2118_RS00105	hypoxanthine-guanine phosphoribosyltransferase 25348:25899 forward MW:20648	Regular	26268170	0	207048970	53	9	15	61.75	261769	200790	118259	0	2	Pass1	PepFrag1	None	17329632	NLPYVGVLKPEVYNK	NLPYVGVLKPEVYNK	168	15	9.47	1746	8	8	3	1	75549340	72977	Identified	11427	5.6	b2b3*b4*b5*b11y4*y6y8y8y10y11y12y12y13y15	260290	1644	168407272831315	128407272831315	0.1362	Green	10516	17329560	17329560	272817	35648	35648.00	2.50	2	8669816
NCDO2118_RS00105	hypoxanthine-guanine phosphoribosyltransferase 25348:25899 forward MW:20648	Regular	26268170	0	207048970	53	9	15	61.75	261769	200790	118259	0	3	Pass1	PepFrag1	None	11736878	GSVPFLAELIK	GSVPFLAELIK	47	11	7.00	1748	8	8	4	1	82474170	73357	Identified	10809	4.6	b3b6b9b9b10y5y6y7y8y9y11	345761	1134	131472525008487	914725250084867	0.1048	Green	29248	11736895	11736918	376346	27440	27440.00	1.79	2	5873484
NCDO2118_RS00105	hypoxanthine-guanine phosphoribosyltransferase 25348:25899 forward MW:20648	Regular	26268170	0	207048970	53	9	15	61.75	261769	200790	118259	0	4	Pass1	PepFrag1	None	10866405	LILDVDTAVK	LILDVDTAVK	85	10	3.88	1750	5	5	4	0	37796800	69969		3559	3.1	y6y7y8y9y10	266130	1059	125609824146261	85609824146261	0.0395	Green	7480	10866366	10866391	248063	10332	10332.00	1.85	2	5438220
NCDO2118_RS00105	hypoxanthine-guanine phosphoribosyltransferase 25348:25899 forward MW:20648	Regular	26268170	0	207048970	53	9	15	61.75	261769	200790	118259	0	5	Pass1	PepFrag1	None	35107104	IVEIKPDYSGFTIPNEFVVGFGLDYEENYR	IVEIKPDYSGFTIPNEFVVGFGLDYEENYR	138	30	3.82	1749	5	5	0	0	2926509	58858	Missing	2678	3.0	b11b26y10y20y30	432542	3222	263740398619851	918701993099256	0.0125	Yellow	29768	35106859	35106832	379045	3281	3281.00	4.00	4	8784269
NCDO2118_RS00105	hypoxanthine-guanine phosphoribosyltransferase 25348:25899 forward MW:20648	Regular	26268170	0	207048970	53	9	15	61.75	261769	200790	118259	0	6	Pass1	PepFrag1	None	12407260	IVTLLDKPEGR	IVTLLDKPEGR	127	11	7.03	1751	2	2	0	0	8752538	63616	Missing	694	2.0	y7y9	178786	1191	135842023393502	958420233935024	0.0113	Green	9675	12407204	12407226	268050	2950	2950.00	2.00	2	6208639
NCDO2118_RS00105	hypoxanthine-guanine phosphoribosyltransferase 25348:25899 forward MW:20648	Regular	26268170	0	207048970	53	9	15	61.75	261769	200790	118259	0	7	Pass2	MissedCleavage	None	16739320	SSGEVKLILDVDTAVK	SSGEVKLILDVDTAVK	79	16	4.31	1753	0	0	0	0	1483659	55908		45	4.3	b8	313825	1602	165526668926466	125526668926466	0.0594	Yellow	31370	16739100	16739104	389760	15560	15560.00	2.08	2	8374586
NCDO2118_RS00105	hypoxanthine-guanine phosphoribosyltransferase 25348:25899 forward MW:20648	Regular	26268170	0	207048970	53	9	15	61.75	261769	200790	118259	0	8	Pass2	MissedCleavage	None	18140270	DILIVEDIIDTGRTLK	DILIVEDIIDTGRTLK	97	16	3.97	1754	3	3	0	0	3301481	59381		503	2.3	b4y2y11y12y16	385783	1748	175436755267207	135436755267207	0.0105	Yellow	27774	18140150	18140144	367804	2756	2756.00	2.07	2	9075111
NCDO2118_RS00105	hypoxanthine-guanine phosphoribosyltransferase 25348:25899 forward MW:20648	Regular	26268170	0	207048970	53	9	15	61.75	261769	200790	118259	0	9	Pass2	MissedCleavage	None	16009057	EYEGKNPLVLGILR	EYEGKNPLVLGILR	33	14	7.03	1752	0	0	0	0	3121702	59138	Missing	367	1.8	b10	270115	1525	160179228163551	667861521090339	0.0066	Yellow	10049	16009234	16009259	270436	1727	1727.00	3.00	3	5343126
NCDO2118_RS00105	hypoxanthine-guanine phosphoribosyltransferase 25348:25899 forward MW:20648	Regular	26268170	0	207048970	53	9	15	61.75	261769	200790	118259	0	10	Pass2	InSource	None	6704610	VLGILR	NPLVLGILR	41	6	11.05	1747	3	3	1	0	2423217	0.0000		2865	0.0	b3y5y6	338010	673	928473850958121	145694770191624	0.0230	Green	18485	6704639	6704657	318755	6018	6018.00	1.00	1	6704639
NCDO2118_RS00105	hypoxanthine-guanine phosphoribosyltransferase 25348:25899 forward MW:20648	Regular	26268170	0	207048970	53	9	15	61.75	261769	200790	118259	0	11	Pass2	InSource	None	5713926	LGILR	NPLVLGILR	42	5	11.05	1747	1	1	0	0	975968	0.0000		1560	0.0	y5	338010	568	829198532217113	125839706443423	0.0228	Green	18474	5713913	5713930	318722	5962	5962.00	1.00	1	5713913
NCDO2118_RS00105	hypoxanthine-guanine phosphoribosyltransferase 25348:25899 forward MW:20648	Regular	26268170	0	207048970	53	9	15	61.75	261769	200790	118259	0	12	Pass2	InSource	None	7074450	NPLVLGI	NPLVLGILR	38	7	6.13	1747	1	1	0	0	2827513	0.0000	Missing	43	0.0	y4	338010	711	963102923907379	152620584781476	0.0155	Green	18489	7074416	7074434	318765	4048	4048.00	1.00	1	7074416
NCDO2118_RS00105	hypoxanthine-guanine phosphoribosyltransferase 25348:25899 forward MW:20648	Regular	26268170	0	207048970	53	9	15	61.75	261769	200790	118259	0	13	Pass2	InSource	None	7835451	LVLGILR	NPLVLGILR	40	7	11.05	1747	1	1	0	0	2691165	0.0000		2138	0.0	y7	338010	797	103927827389527	167855654779053	0.0142	Green	18471	7835435	7835454	318716	3726	3726.00	1.00	1	7835435
NCDO2118_RS00105	hypoxanthine-guanine phosphoribosyltransferase 25348:25899 forward MW:20648	Regular	26268170	0	207048970	53	9	15	61.75	261769	200790	118259	0	14	Pass2	InSource	None	8805979	PLVLGILR	NPLVLGILR	39	8	11.05	1747	4	4	2	1	39955070	0.0000	Missing	1216	0.0	b3y4y5y6	338010	887	11161144069031	716114406903103	0.0128	Green	18464	8805921	8805947	318694	3340	3340.00	2.00	2	4407997
NCDO2118_RS00105	hypoxanthine-guanine phosphoribosyltransferase 25348:25899 forward MW:20648	Regular	26268170	0	207048970	53	9	15	61.75	261769	200790	118259	0	15	Pass2	InSource	None	4583085	GILR	NPLVLGILR	43	4	11.05	1747	1	1	0	0	1783916	0.0000		357	0.0	y4	338010	444	70363637240563	100727274481126	0.0049	Green	18476	4583068	4583084	318723	1279	1279.00	1.00	1	4583068
NCDO2118_RS00105	hypoxanthine-guanine phosphoribosyltransferase 25348:25899 forward MW:20648	Regular	24568440	0	207048970	25	4	15	16.94	130052	188281.5	85713	1	1	Pass1	PepFrag1	None	10866405	LILDVDTAVK	LILDVDTAVK	85	10	3.88	909	17	17	15	7	445448200	80392		83344	7.7	b2b3b4b5b6b7b8b8b9y1y2y3y4y5y6y7y8y8y9y9y10	253052	1059	125609824146261	85609824146261	0.9554	Green	11896	10866441	10866456	258380	124254	124254.00	1.71	2	5438257
NCDO2118_RS00105	hypoxanthine-guanine phosphoribosyltransferase 25348:25899 forward MW:20648	Regular	24568440	0	207048970	25	4	15	16.94	130052	188281.5	85713	0	2	Pass1	PepFrag1	None	9025193	ELGEILTK	ELGEILTK	25	8	4.26	910	1	1	0	0	5192938	61058		30	1.3	y6	210025	866	109842791715871	179685583431742	0.0097	Green	9041	9025114	9025123	236562	1267	1267.00	1.55	1	9025114
NCDO2118_RS00105	hypoxanthine-guanine phosphoribosyltransferase 25348:25899 forward MW:20648	Regular	24568440	0	207048970	25	4	15	16.94	130052	188281.5	85713	0	3	Pass2	VarMod	Phosphoryl STY(7)	9824856	ELGEILTK	ELGEILTK	25	8	4.26	911	3	3	1	0	8473802	63185		1938	1.7	b2b3y3-H3PO4y6-H3PO4y8	210025	866	109842791715871	179685583431742	0.0197	Green	19708	9824831	9824838	329987	2562	2562.00	1.32	1	9824831
NCDO2118_RS00105	hypoxanthine-guanine phosphoribosyltransferase 25348:25899 forward MW:20648	Regular	24568440	0	207048970	25	4	15	16.94	130052	188281.5	85713	0	4	Pass2	VarMod	Phosphoryl STY(12)	15827975	VLVSEEEIIEKSK	VLVSEEEIIEKSK	12	13	4.26	912	3	3	0	0	2122688	57173		351	1.5	b10y8y10	227039	1434	153741955864748	113741955864748	0.0082	Yellow	20958	15828002	15827997	344619	1068	1068.00	2.00	2	7919038
NCDO2118_RS00105	hypoxanthine-guanine phosphoribosyltransferase 25348:25899 forward MW:20648	Regular	24568440	0	207048970	25	4	15	16.94	130052	188281.5	85713	0	5	Pass2	InSource	None	6323614	VDTAVK	LILDVDTAVK	89	6	6.78	909	1	1	0	0	2088415	0.0000		50	0.0	b3	253052	596	856230066526956	131246013305391	0.0069	Green	11906	6323553	6323566	258436	901	901.00	1.00	1	6323553
NCDO2118_RS00105	hypoxanthine-guanine phosphoribosyltransferase 25348:25899 forward MW:20648	Regular	48716840	0	207048970	62	11	15	67.21	364683	312304	149619	1	1	Pass1	PepFrag1	None	9946408	NPLVLGILR	NPLVLGILR	38	9	11.05	1360	10	10	7	3	280127500	81350	Identified	65611	7.8	b2b2*b3b3*b4b4*b6y4y5y6y7y8y9y9*	314552	983	119525888140019	795258881400194	0.3984	Green	25125	9946344	9946370	311142	145304	145304.00	1.89	2	4978209
NCDO2118_RS00105	hypoxanthine-guanine phosphoribosyltransferase 25348:25899 forward MW:20648	Regular	48716840	0	207048970	62	11	15	67.21	364683	312304	149619	0	2	Pass1	PepFrag1	None	17329632	NLPYVGVLKPEVYNK	NLPYVGVLKPEVYNK	168	15	9.47	1359	12	12	5	1	163270300	79006	Identified	40661	8.2	b2b6b7b13y3y4y5y6y7*y7y10y10*y11y13y15	245831	1644	168407272831315	128407272831315	0.2746	Green	14523	17329646	17329651	268435	100158	100158.00	2.39	2	8669860
NCDO2118_RS00105	hypoxanthine-guanine phosphoribosyltransferase 25348:25899 forward MW:20648	Regular	48716840	0	207048970	62	11	15	67.21	364683	312304	149619	0	3	Pass1	PepFrag1	None	11736878	GSVPFLAELIK	GSVPFLAELIK	47	11	7.00	1361	9	9	4	1	310554000	81798	Identified	26952	6.3	b3b3b9b10y3y4y6y7y8y9y11	359582	1134	131472525008487	914725250084867	0.1833	Green	40312	11736855	11736878	372621	66842	66842.00	1.88	2	5873464
NCDO2118_RS00105	hypoxanthine-guanine phosphoribosyltransferase 25348:25899 forward MW:20648	Regular	48716840	0	207048970	62	11	15	67.21	364683	312304	149619	0	4	Pass1	PepFrag1	None	10866405	LILDVDTAVK	LILDVDTAVK	85	10	3.88	1358	3	3	0	0	15917820	68896		2373	3.3	y4y8y10	267226	1059	125609824146261	85609824146261	0.0337	Green	11049	10866370	10866395	252944	12294	12294.00	1.80	2	5438222
NCDO2118_RS00105	hypoxanthine-guanine phosphoribosyltransferase 25348:25899 forward MW:20648	Regular	48716840	0	207048970	62	11	15	67.21	364683	312304	149619	0	5	Pass1	PepFrag1	None	15087843	ELGEILTKEYEGK	ELGEILTKEYEGK	25	13	4.26	1362	2	2	0	0	5288849	64110		380	1.8	b4y13	204365	1408	15187795379748	612519691983198	0.0049	Green	11081	15087798	15087837	253151	1788	1788.00	3.00	3	5035981
NCDO2118_RS00105	hypoxanthine-guanine phosphoribosyltransferase 25348:25899 forward MW:20648	Regular	48716840	0	207048970	62	11	15	67.21	364683	312304	149619	0	6	Pass2	PepFrag2	None	12407260	IVTLLDKPEGR	IVTLLDKPEGR	127	11	7.03	1364	7	7	5	0	25348500	70916	Identified	2001	2.3	y4y5y6y6y7y8y9y11	168009	1191	135842023393502	958420233935024	0.0112	Green	2374	12407117	12407139	192510	4077	4077.00	2.33	2	6208595
NCDO2118_RS00105	hypoxanthine-guanine phosphoribosyltransferase 25348:25899 forward MW:20648	Regular	48716840	0	207048970	62	11	15	67.21	364683	312304	149619	0	7	Pass2	PepFrag2	None	14718003	DILIVEDIIDTGR	DILIVEDIIDTGR	97	13	3.50	1363	0	0	0	0	1701489	59185		80	1.8	y5	380888	1396	151013780440696	111013780440696	0.0047	Yellow	34523	14717825	14717841	348512	1711	1711.00	2.00	2	7363949
NCDO2118_RS00105	hypoxanthine-guanine phosphoribosyltransferase 25348:25899 forward MW:20648	Regular	48716840	0	207048970	62	11	15	67.21	364683	312304	149619	0	8	Pass2	MissedCleavage	None	18140270	DILIVEDIIDTGRTLK	DILIVEDIIDTGRTLK	97	16	3.97	1367	1	1	0	0	3740895	62607		828	1.9	b13y7y16	377559	1748	175436755267207	135436755267207	0.0046	Green	38666	18140188	18140188	365727	1686	1686.00	2.00	2	9075130
NCDO2118_RS00105	hypoxanthine-guanine phosphoribosyltransferase 25348:25899 forward MW:20648	Regular	48716840	0	207048970	62	11	15	67.21	364683	312304	149619	0	9	Pass2	MissedCleavage	Carbamidomethyl C(15)	35897454	GSVPFLAELIKHIDCHLETDFMTVSSYHGGTK	GSVPFLAELIKHIDCHLETDFMTVSSYHGGTK	47	32	5.75	1366	2	2	0	0	3805848	62681	Identified	260	2.2	b3b8b30	374885	3274	26657049856791	13771366571194	0.0033	Green	30355	35897461	35897316	332350	1210	1210.00	3.00	3	11972535
NCDO2118_RS00105	hypoxanthine-guanine phosphoribosyltransferase 25348:25899 forward MW:20648	Regular	48716840	0	207048970	62	11	15	67.21	364683	312304	149619	0	10	Pass2	MissedCleavage	None	17289630	AIEKVLVSEEEIIEK	AIEKVLVSEEEIIEK	8	15	4.08	1365	0	0	0	0	2337454	60564		38	1.5	b4	326588	1661	169566239621622	730441597477478	0.0027	Yellow	36840	17289593	17289625	358276	1000	1000.00	3.00	3	5769913
NCDO2118_RS00105	hypoxanthine-guanine phosphoribosyltransferase 25348:25899 forward MW:20648	Regular	48716840	0	207048970	62	11	15	67.21	364683	312304	149619	0	11	Pass2	VarMod	Phosphoryl STY(1)	18038776	SKELGEILTKEYEGK	SKELGEILTKEYEGK	23	15	4.73	1368	2	2	0	0	2891739	61488		1200	1.6	b8b10b12b13-H3PO4b14y7y14y15-H3PO4	195671	1616	166489636518861	126489636518861	0.0029	Green	44356	18038747	18038748	392301	1060	1060.00	2.00	2	9024410
NCDO2118_RS00105	hypoxanthine-guanine phosphoribosyltransferase 25348:25899 forward MW:20648	Regular	48716840	0	207048970	62	11	15	67.21	364683	312304	149619	0	12	Pass2	InSource	None	9305659	PFLAELIK	GSVPFLAELIK	50	8	7.00	1361	9	9	7	2	142958000	0.0000	Identified	6372	0.0	b2b3b4b5b6y5y6y7y8	359582	908	113366185315295	733661853152945	0.0549	Green	40314	9305600	9305625	372634	20021	20021.00	1.55	2	4657836
NCDO2118_RS00105	hypoxanthine-guanine phosphoribosyltransferase 25348:25899 forward MW:20648	Regular	48716840	0	207048970	62	11	15	67.21	364683	312304	149619	0	13	Pass2	InSource	None	5713926	LGILR	NPLVLGILR	42	5	11.05	1360	5	5	2	1	12690650	0.0000		2863	0.0	b3b4b5y1y5	314552	568	829198532217113	125839706443423	0.0173	Green	25140	5713892	5713913	311187	6312	6312.00	1.00	1	5713892
NCDO2118_RS00105	hypoxanthine-guanine phosphoribosyltransferase 25348:25899 forward MW:20648	Regular	48716840	0	207048970	62	11	15	67.21	364683	312304	149619	0	14	Pass2	NeutralLoss_NH3	None	9776142	NPLVLGILR	NPLVLGILR	38	9	11.05	1360	0	0	0	0	1417863	0.0000	Missing	0	0.0		314552	983	119525888140019	795258881400194	0.0033	Green	25139	9776150	9776175	311184	1220	1220.00	2.00	2	4893111
NCDO2118_RS00105	hypoxanthine-guanine phosphoribosyltransferase 25348:25899 forward MW:20648	Regular	10908820	0	207048970	20	6	15	34.97	64337	57943	22454	1	1	Pass1	PepFrag1	None	9946408	NPLVLGILR	NPLVLGILR	38	9	11.05	1196	9	9	5	3	119988600	71169	Missing	17054	5.0	b2b3b3*b4b5*b6y4y5y6y7y9	338324	983	119525888140019	795258881400194	0.6677	Green	14662	9946380	9946408	316862	42958	42958.00	1.91	2	4978226
NCDO2118_RS00105	hypoxanthine-guanine phosphoribosyltransferase 25348:25899 forward MW:20648	Regular	10908820	0	207048970	20	6	15	34.97	64337	57943	22454	0	2	Pass1	PepFrag1	None	17329632	NLPYVGVLKPEVYNK	NLPYVGVLKPEVYNK	168	15	9.47	1195	5	5	1	0	42798320	66692	Identified	2872	3.6	y6y10y10y11y13y15	266029	1644	168407272831315	722715152208768	0.1573	Green	8154	17329535	17329568	275048	10120	10120.00	2.69	3	5783227
NCDO2118_RS00105	hypoxanthine-guanine phosphoribosyltransferase 25348:25899 forward MW:20648	Regular	10908820	0	207048970	20	6	15	34.97	64337	57943	22454	0	3	Pass1	PepFrag1	None	11736878	GSVPFLAELIK	GSVPFLAELIK	47	11	7.00	1197	4	4	1	0	19553490	63290	Identified	1746	2.4	b3b8y7y8y11	346534	1134	131472525008487	914725250084867	0.0756	Green	23910	11736828	11736852	379015	4865	4865.00	1.88	2	5873450
NCDO2118_RS00105	hypoxanthine-guanine phosphoribosyltransferase 25348:25899 forward MW:20648	Regular	10908820	0	207048970	20	6	15	34.97	64337	57943	22454	0	4	Pass1	PepFrag1	None	10866405	LILDVDTAVK	LILDVDTAVK	85	10	3.88	1199	1	1	0	0	2717954	54720		574	2.1	b8b9y9	261653	1059	125609824146261	85609824146261	0.0532	Yellow	5080	10866347	10866373	243122	3422	3422.00	2.00	2	5438210
NCDO2118_RS00105	hypoxanthine-guanine phosphoribosyltransferase 25348:25899 forward MW:20648	Regular	10908820	0	207048970	20	6	15	34.97	64337	57943	22454	0	5	Pass1	PepFrag1	None	15087843	ELGEILTKEYEGK	ELGEILTKEYEGK	25	13	4.26	1198	1	1	0	0	2474942	54313		117	1.5	b5b6	237257	1408	15187795379748	11187795379748	0.0167	Yellow	5462	15087819	15087831	247284	1076	1076.00	2.00	2	7548946
NCDO2118_RS00105	hypoxanthine-guanine phosphoribosyltransferase 25348:25899 forward MW:20648	Regular	10908820	0	207048970	20	6	15	34.97	64337	57943	22454	0	6	Pass2	MissedCleavage	None	16739320	SSGEVKLILDVDTAVK	SSGEVKLILDVDTAVK	79	16	4.31	1200	0	0	0	0	4280576	56693		91	2.0	b7y7	319528	1602	165526668926466	125526668926466	0.0295	Yellow	13365	16739401	16739403	309476	1896	1896.00	2.00	2	8374737
NCDO2118_RS00105	hypoxanthine-guanine phosphoribosyltransferase 25348:25899 forward MW:20648	Regular	13602580	0	207048970	15	2	15	20.22	83380	199905	35735	1	1	Pass1	PepFrag1	None	10866405	LILDVDTAVK	LILDVDTAVK	85	10	3.88	1012	14	14	11	5	248927200	75297		35334	6.1	b2b3b4b5b6b7b9y3y4y5y6y6y7y8y8y9y10	252330	1059	125609824146261	85609824146261	0.7992	Green	9341	10866422	10866446	258529	66635	66635.00	1.71	2	5438248
NCDO2118_RS00105	hypoxanthine-guanine phosphoribosyltransferase 25348:25899 forward MW:20648	Regular	13602580	0	207048970	15	2	15	20.22	83380	199905	35735	0	2	Pass2	MissedCleavage	Carbamidomethyl C(4)	30223670	HIDCHLETDFMTVSSYHGGTKSSGEVK	HIDCHLETDFMTVSSYHGGTKSSGEVK	58	27	5.75	1013	0	0	0	0	1669003	53561		58	5.1	y9	250277	2683	233439000989883	115626000659922	0.1781	Yellow	9844	30224071	30224009	263524	14854	14854.00	2.98	3	10081405
NCDO2118_RS00105	hypoxanthine-guanine phosphoribosyltransferase 25348:25899 forward MW:20648	Regular	13602580	0	207048970	15	2	15	20.22	83380	199905	35735	0	3	Pass2	InSource	None	9735564	ILDVDTAVK	LILDVDTAVK	86	9	3.88	1012	1	1	0	0	1470175	0.0000		343	0.0	y9	252330	935	115602539558	191205079115999	0.0227	Green	9350	9735550	9735557	258692	1891	1891.00	1.00	1	9735550
NCDO2118_RS00105	hypoxanthine-guanine phosphoribosyltransferase 25348:25899 forward MW:20648	Regular	27206300	0	207048970	36	6	15	37.70	207657	181885	87749	1	1	Pass1	PepFrag1	None	9946408	NPLVLGILR	NPLVLGILR	38	9	11.05	1923	9	9	5	2	250752600	78339	Identified	55436	7.4	b2b2*b3*b4b4*b7*y2y4y5y6y7y8y9y9*	329198	983	119525888140019	795258881400194	0.6095	Green	21886	9946345	9946369	317586	126570	126570.00	1.86	2	4978209
NCDO2118_RS00105	hypoxanthine-guanine phosphoribosyltransferase 25348:25899 forward MW:20648	Regular	27206300	0	207048970	36	6	15	37.70	207657	181885	87749	0	2	Pass1	PepFrag1	None	17329632	NLPYVGVLKPEVYNK	NLPYVGVLKPEVYNK	168	15	9.47	1922	6	6	1	0	54052070	71675	Identified	14009	5.3	y3y5*y6y6y7y8y8*y10y11y11*y13	253606	1644	168407272831315	722715152208768	0.1420	Green	11644	17329517	17329554	271052	29482	29482.00	2.99	3	5783221
NCDO2118_RS00105	hypoxanthine-guanine phosphoribosyltransferase 25348:25899 forward MW:20648	Regular	27206300	0	207048970	36	6	15	37.70	207657	181885	87749	0	3	Pass1	PepFrag1	None	11736878	GSVPFLAELIK	GSVPFLAELIK	47	11	7.00	1925	7	7	4	0	136255500	75690	Identified	10926	4.5	b3y3y5y6y7y8y9y11	348397	1134	131472525008487	914725250084867	0.1244	Green	34720	11736880	11736901	375771	25833	25833.00	1.89	2	5873476
NCDO2118_RS00105	hypoxanthine-guanine phosphoribosyltransferase 25348:25899 forward MW:20648	Regular	27206300	0	207048970	36	6	15	37.70	207657	181885	87749	0	4	Pass1	PepFrag1	None	10866405	LILDVDTAVK	LILDVDTAVK	85	10	3.88	1926	4	4	1	0	32936890	69524		3070	3.0	b9y7y8y10	266845	1059	125609824146261	85609824146261	0.0473	Green	8884	10866390	10866412	255273	9825	9825.00	1.77	2	5438231
NCDO2118_RS00105	hypoxanthine-guanine phosphoribosyltransferase 25348:25899 forward MW:20648	Regular	27206300	0	207048970	36	6	15	37.70	207657	181885	87749	0	5	Pass1	PepFrag1	None	17239113	SKELGEILTKEYEGK	SKELGEILTKEYEGK	23	15	4.73	1924	4	4	1	1	5054415	61383		564	2.9	b12y2y3y3y4y11	265867	1616	166489636518861	126489636518861	0.0289	Green	22925	17239184	17239185	322537	6009	6009.00	2.00	2	8624628
NCDO2118_RS00105	hypoxanthine-guanine phosphoribosyltransferase 25348:25899 forward MW:20648	Regular	27206300	0	207048970	36	6	15	37.70	207657	181885	87749	0	6	Pass1	PepFrag1	None	12006735	YLKELLEHR	YLKELLEHR	113	9	7.75	1927	1	1	0	0	800264	53379		34	1.5	y7	160333	1132	131317896906207	913178969062067	0.0071	Red	5758	12006652	12006672	233150	1474	1474.00	2.00	2	6008362
NCDO2118_RS00105	hypoxanthine-guanine phosphoribosyltransferase 25348:25899 forward MW:20648	Regular	27206300	0	207048970	36	6	15	37.70	207657	181885	87749	0	7	Pass2	InSource	None	5713926	LGILR	NPLVLGILR	42	5	11.05	1923	1	1	0	0	1218838	0.0000		1677	0.0	y5	329198	568	829198532217113	125839706443423	0.0231	Green	21894	5713892	5713910	317619	4805	4805.00	1.00	1	5713892
NCDO2118_RS00105	hypoxanthine-guanine phosphoribosyltransferase 25348:25899 forward MW:20648	Regular	27206300	0	207048970	36	6	15	37.70	207657	181885	87749	0	8	Pass2	InSource	None	7835451	LVLGILR	NPLVLGILR	40	7	11.05	1923	1	1	0	0	1702135	0.0000		1622	0.0	y7	329198	797	103927827389527	167855654779053	0.0118	Green	21867	7835463	7835482	317527	2458	2458.00	1.00	1	7835463
NCDO2118_RS00105	hypoxanthine-guanine phosphoribosyltransferase 25348:25899 forward MW:20648	Regular	27206300	0	207048970	36	6	15	37.70	207657	181885	87749	0	9	Pass2	InSource	None	4583085	GILR	NPLVLGILR	43	4	11.05	1923	3	3	0	0	1658869	0.0000		411	0.0	b3y2y4	329198	444	70363637240563	100727274481126	0.0058	Green	21861	4583043	4583059	317494	1201	1201.00	1.00	1	4583043
NCDO2118_RS00105	hypoxanthine-guanine phosphoribosyltransferase 25348:25899 forward MW:20648	Regular	10085940	0	207048970	15	3	15	12.57	29195	44187	13829	1	1	Pass1	PepFrag1	None	14718003	DILIVEDIIDTGR	DILIVEDIIDTGR	97	13	3.50	950	10	10	6	4	141014700	71530		5403	3.9	b2b3b4b8y4y5y8y9y10y11	346662	1396	151013780440696	111013780440696	0.5045	Green	16310	14717993	14718001	378780	14729	14729.00	2.00	2	7364033
NCDO2118_RS00105	hypoxanthine-guanine phosphoribosyltransferase 25348:25899 forward MW:20648	Regular	10085940	0	207048970	15	3	15	12.57	29195	44187	13829	0	2	Pass2	PepFrag2	Carbamidomethyl C(4)	24350755	HIDCHLETDFMTVSSYHGGTK	HIDCHLETDFMTVSSYHGGTK	58	21	5.73	952	1	1	0	0	596961	47797		190	1.7	y12y13	237593	2140	200771539786879	938476931912525	0.0319	Red	12119	24350218	24350211	269045	931	931.00	3.00	3	8123455
NCDO2118_RS00105	hypoxanthine-guanine phosphoribosyltransferase 25348:25899 forward MW:20648	Regular	10085940	0	207048970	15	3	15	12.57	29195	44187	13829	0	3	Pass2	VarMod	Phosphoryl STY(7)	11666068	LILDVDTAVK	LILDVDTAVK	85	10	3.88	951	3	3	2	0	5249177	57238		3830	2.6	y8y9y9y10	261264	1059	125609824146261	211219648292522	0.2274	Green	8114	11666079	11666083	220970	6640	6640.00	1.29	1	11666079
NCDO2118_RS00105	hypoxanthine-guanine phosphoribosyltransferase 25348:25899 forward MW:20648	Regular	10085940	0	207048970	15	3	15	12.57	29195	44187	13829	0	4	Pass2	InSource	Phosphoryl STY(6)	10535227	ILDVDTAVK	LILDVDTAVK	86	9	3.88	951	1	1	0	0	659891	0.0000		4406	0.0	b4b7-H3PO4y9	261264	935	115602539558	191205079115999	0.2362	Green	8108	10535281	10535288	220922	6895	6895.00	1.00	1	10535281
NCDO2118_RS00105	hypoxanthine-guanine phosphoribosyltransferase 25348:25899 forward MW:20648	Regular	9044491	0	207048970	17	4	15	25.68	96948	228717	42607	1	1	Pass1	PepFrag1	None	10866405	LILDVDTAVK	LILDVDTAVK	85	10	3.88	964	12	12	8	4	161989900	71659		41432	6.4	b2b3b4b5b8b8y3y4y5y6y7y7y8y10	257355	1059	125609824146261	85609824146261	0.7864	Green	8824	10866439	10866462	258530	76239	76239.00	1.76	2	5438256
NCDO2118_RS00105	hypoxanthine-guanine phosphoribosyltransferase 25348:25899 forward MW:20648	Regular	9044491	0	207048970	17	4	15	25.68	96948	228717	42607	0	2	Pass2	PepFrag2	None	14718003	DILIVEDIIDTGR	DILIVEDIIDTGR	97	13	3.50	967	0	0	0	0	1070825	49861		106	1.6	b7y8	362558	1396	151013780440696	111013780440696	0.0136	Red	10480	14717419	14717426	278346	1319	1319.00	2.00	2	7363746
NCDO2118_RS00105	hypoxanthine-guanine phosphoribosyltransferase 25348:25899 forward MW:20648	Regular	9044491	0	207048970	17	4	15	25.68	96948	228717	42607	0	3	Pass2	PepFrag2	None	11176463	SKELGEILTK	SKELGEILTK	23	10	7.08	965	0	0	0	0	2132194	52852		63	1.5	y3	186519	1074	126793158860728	867931588607284	0.0136	Yellow	4227	11176321	11176344	202509	1318	1318.00	2.00	2	5593197
NCDO2118_RS00105	hypoxanthine-guanine phosphoribosyltransferase 25348:25899 forward MW:20648	Regular	9044491	0	207048970	17	4	15	25.68	96948	228717	42607	0	4	Pass2	MissedCleavage	Carbamidomethyl C(4)	30223670	HIDCHLETDFMTVSSYHGGTKSSGEVK	HIDCHLETDFMTVSSYHGGTKSSGEVK	58	27	5.75	966	0	0	0	0	2217178	53022		70	5.2	y11	294341	2683	233439000989883	115626000659922	0.1609	Yellow	9342	30224085	30223996	264117	15599	15599.00	3.00	3	10081410
NCDO2118_RS00105	hypoxanthine-guanine phosphoribosyltransferase 25348:25899 forward MW:20648	Regular	9044491	0	207048970	17	4	15	25.68	96948	228717	42607	0	5	Pass2	InSource	None	7473883	DVDTAVK	LILDVDTAVK	88	7	3.88	964	5	5	2	1	26149710	0.0000		936	0.0	b4b4b5b5y3y4y7	257355	687	941305924769588	148261184953918	0.0255	Green	8835	7473897	7473908	258647	2473	2473.00	1.00	1	7473897
NCDO2118_RS00105	hypoxanthine-guanine phosphoribosyltransferase 25348:25899 forward MW:20648	Regular	23604860	0	207048970	42	8	15	44.81	227499	188356	94842	1	1	Pass1	PepFrag1	None	9946408	NPLVLGILR	NPLVLGILR	38	9	11.05	1815	10	10	6	3	210674800	76966	Identified	79034	7.9	b2b2*b3b3*b4*b5b8*b9y4y5y6y7y8y9y9*	327193	983	119525888140019	795258881400194	0.6593	Green	21027	9946332	9946359	319010	149992	149992.00	1.84	2	4978202
NCDO2118_RS00105	hypoxanthine-guanine phosphoribosyltransferase 25348:25899 forward MW:20648	Regular	23604860	0	207048970	42	8	15	44.81	227499	188356	94842	0	2	Pass1	PepFrag1	None	17329632	NLPYVGVLKPEVYNK	NLPYVGVLKPEVYNK	168	15	9.47	1819	0	0	0	0	4377073	60142	Missing	100	4.7	y10	268531	1644	168407272831315	722715152208768	0.0975	Yellow	11174	17329525	17329567	271667	22189	22189.00	3.00	3	5783223
NCDO2118_RS00105	hypoxanthine-guanine phosphoribosyltransferase 25348:25899 forward MW:20648	Regular	23604860	0	207048970	42	8	15	44.81	227499	188356	94842	0	3	Pass1	PepFrag1	None	11736878	GSVPFLAELIK	GSVPFLAELIK	47	11	7.00	1816	9	9	3	2	157865200	75713	Identified	6907	3.8	b3b3b7b9y3y4y6y7y8y11	350381	1134	131472525008487	914725250084867	0.0711	Green	33527	11736831	11736857	376932	16175	16175.00	1.83	2	5873452
NCDO2118_RS00105	hypoxanthine-guanine phosphoribosyltransferase 25348:25899 forward MW:20648	Regular	23604860	0	207048970	42	8	15	44.81	227499	188356	94842	0	4	Pass1	PepFrag1	None	10866405	LILDVDTAVK	LILDVDTAVK	85	10	3.88	1818	7	7	3	0	55893280	71204		3964	3.2	b4b8y4y7y8y9y10	261925	1059	125609824146261	85609824146261	0.0519	Green	8508	10866365	10866392	254956	11801	11801.00	1.79	2	5438219
NCDO2118_RS00105	hypoxanthine-guanine phosphoribosyltransferase 25348:25899 forward MW:20648	Regular	23604860	0	207048970	42	8	15	44.81	227499	188356	94842	0	5	Pass1	PepFrag1	None	17239113	SKELGEILTKEYEGK	SKELGEILTKEYEGK	23	15	4.73	1817	3	3	1	0	4167307	59929		858	1.5	b7b7b8y8y9y9	282691	1616	166489636518861	126489636518861	0.0038	Yellow	17959	17239253	17239264	306356	874	874.00	2.35	2	8624663
NCDO2118_RS00105	hypoxanthine-guanine phosphoribosyltransferase 25348:25899 forward MW:20648	Regular	23604860	0	207048970	42	8	15	44.81	227499	188356	94842	0	6	Pass2	MissedCleavage	None	18140270	DILIVEDIIDTGRTLK	DILIVEDIIDTGRTLK	97	16	3.97	1821	2	2	0	0	7100139	62243		117	2.8	b2y13y14	374198	1748	175436755267207	135436755267207	0.0211	Green	31636	18140180	18140186	367726	4800	4800.00	2.08	2	9075126
NCDO2118_RS00105	hypoxanthine-guanine phosphoribosyltransferase 25348:25899 forward MW:20648	Regular	23604860	0	207048970	42	8	15	44.81	227499	188356	94842	0	7	Pass2	MissedCleavage	None	16009057	EYEGKNPLVLGILR	EYEGKNPLVLGILR	33	14	7.03	1820	1	1	0	0	2185052	57125	Missing	101	1.5	b9*y5	282854	1525	160179228163551	667861521090339	0.0048	Yellow	10981	16009176	16009221	270681	1086	1086.00	3.00	3	5343107
NCDO2118_RS00105	hypoxanthine-guanine phosphoribosyltransferase 25348:25899 forward MW:20648	Regular	23604860	0	207048970	42	8	15	44.81	227499	188356	94842	0	8	Pass2	VarMod	Phosphoryl STY(*)	17538983	SSGEVKLILDVDTAVK	SSGEVKLILDVDTAVK	79	16	4.31	1822	3	3	0	0	4636472	60392		144	3.5	b8b11y3	315696	1602	165526668926466	125526668926466	0.0402	Yellow	43636	17539053	17539062	468653	9146	9146.00	2.00	2	8774563
NCDO2118_RS00105	hypoxanthine-guanine phosphoribosyltransferase 25348:25899 forward MW:20648	Regular	23604860	0	207048970	42	8	15	44.81	227499	188356	94842	0	9	Pass2	InSource	None	5713926	LGILR	NPLVLGILR	42	5	11.05	1815	3	3	0	1	5789319	0.0000		2436	0.0	b3y2y5	327193	568	829198532217113	125839706443423	0.0257	Green	21004	5713918	5713940	318945	5839	5839.00	1.00	1	5713918
NCDO2118_RS00105	hypoxanthine-guanine phosphoribosyltransferase 25348:25899 forward MW:20648	Regular	23604860	0	207048970	42	8	15	44.81	227499	188356	94842	0	10	Pass2	InSource	None	8805979	PLVLGILR	NPLVLGILR	39	8	11.05	1815	4	4	2	0	25010730	0.0000	Missing	1181	0.0	y3y5y6y7	327193	887	11161144069031	716114406903103	0.0176	Green	21002	8805902	8805929	318942	4011	4011.00	2.00	2	4407987
NCDO2118_RS00105	hypoxanthine-guanine phosphoribosyltransferase 25348:25899 forward MW:20648	Regular	23604860	0	207048970	42	8	15	44.81	227499	188356	94842	0	11	Pass2	NeutralLoss_NH3	None	9776142	NPLVLGILR	NPLVLGILR	38	9	11.05	1815	0	0	0	0	1331186	0.0000	Missing	0	0.0		327193	983	119525888140019	795258881400194	0.0070	Green	21029	9776146	9776174	319013	1586	1586.00	2.00	2	4893110
NCDO2118_RS00105	hypoxanthine-guanine phosphoribosyltransferase 25348:25899 forward MW:20648	Regular	6739573	0.45	207048970	11	1	15	7.10	7359	22077	3173	1	1	Pass1	PepFrag1	None	14718003	DILIVEDIIDTGR	DILIVEDIIDTGR	97	13	3.50	1357	11	11	7	4	94872440	68058		3173	3.0	b2b3b4b7y4y5y6y8y9y9y10y11	340770	1396	151013780440696	111013780440696	10000	Green	17222	14718038	14718047	378670	7359	7359.00	2.00	2	7364056
NCDO2118_RS00105	hypoxanthine-guanine phosphoribosyltransferase 25348:25899 forward MW:20648	Regular	3030017	0.69	207048970	10	2	15	13.11	80745	121117.5	2112	1	1	Pass1	PepFrag1	None	12877042	VLVSEEEIIEK	VLVSEEEIIEK	12	11	3.79	728	3	3	1	0	2705736	49137		738	6.6	b2b3b5b6b6y6	254497	1226	138490488654813	984904886548132	0.9462	Red	7388	12876991	12877019	256280	76398	76398.00	2.00	2	6443532
NCDO2118_RS00105	hypoxanthine-guanine phosphoribosyltransferase 25348:25899 forward MW:20648	Regular	3030017	0.69	207048970	10	2	15	13.11	80745	121117.5	2112	0	2	Pass1	PepFrag1	None	14718003	DILIVEDIIDTGR	DILIVEDIIDTGR	97	13	3.50	727	7	7	4	2	40363850	60874		1374	2.5	b2b3b4b5b8y8y9	356815	1396	151013780440696	111013780440696	0.0538	Green	11790	14718063	14718082	378511	4347	4347.00	2.00	2	7364068
NCDO2118_RS00105	hypoxanthine-guanine phosphoribosyltransferase 25348:25899 forward MW:20648	Regular	3136609	2.65	207048970	15	4	15	12.57	21818	26413.5	7592	1	1	Pass1	PepFrag1	None	10866405	LILDVDTAVK	LILDVDTAVK	85	10	3.88	735	7	7	3	1	47384950	61721		6135	3.7	b2y3y5y6y8y8y9y10	270273	1059	125609824146261	85609824146261	0.7703	Green	6482	10866376	10866401	258744	16807	16807.00	1.84	2	5438224
NCDO2118_RS00105	hypoxanthine-guanine phosphoribosyltransferase 25348:25899 forward MW:20648	Regular	3136609	2.65	207048970	15	4	15	12.57	21818	26413.5	7592	0	2	Pass1	PepFrag1	None	15087843	ELGEILTKEYEGK	ELGEILTKEYEGK	25	13	4.26	736	1	1	0	0	3564421	50485		42	1.3	y7	233669	1408	15187795379748	11187795379748	0.0368	Yellow	11860	15087731	15087740	377911	802	802.00	2.00	2	7548902
NCDO2118_RS00105	hypoxanthine-guanine phosphoribosyltransferase 25348:25899 forward MW:20648	Regular	3136609	2.65	207048970	15	4	15	12.57	21818	26413.5	7592	0	3	Pass2	PepFrag2	None	12877042	VLVSEEEIIEK	VLVSEEEIIEK	12	11	3.79	738	2	2	0	0	1614817	47046		426	1.3	y1y8	287284	1226	138490488654813	984904886548132	0.0442	Red	7436	12876555	12876575	277103	965	965.00	2.00	2	6443314
NCDO2118_RS00105	hypoxanthine-guanine phosphoribosyltransferase 25348:25899 forward MW:20648	Regular	3136609	2.65	207048970	15	4	15	12.57	21818	26413.5	7592	0	4	Pass2	PepFrag2	None	17329632	NLPYVGVLKPEVYNK	NLPYVGVLKPEVYNK	168	15	9.47	737	1	1	0	0	2403308	48773	Identified	102	1.5	y13	286571	1644	168407272831315	128407272831315	0.0422	Red	12527	17329307	17329302	401526	920	920.00	2.00	2	8669690
NCDO2118_RS00105	hypoxanthine-guanine phosphoribosyltransferase 25348:25899 forward MW:20648	Regular	3136609	2.65	207048970	15	4	15	12.57	21818	26413.5	7592	0	5	Pass2	InSource	None	8604724	LDVDTAVK	LILDVDTAVK	87	8	3.88	735	4	4	0	0	12346500	0.0000		887	0.0	b6b6y4y6y8	270273	811	105141347095775	170282694191551	0.1065	Green	6487	8604715	8604723	258787	2324	2324.00	1.00	1	8604715
NCDO2118_RS00110	ATP-dependent zinc metalloprotease FtsH 26105:28192 forward MW:75561	Regular	13127170	0	755608538	56	7	58	13.81	153348	101198	45837	1	1	Pass1	PepFrag1	None	35457226	IGGYMLALPDEEIMQPTNFHLQDQLASLMGGR	IGGYMLALPDEEIMQPTNFHLQDQLASLMGGR	483	32	4.06	828	6	6	0	0	10635440	61449	Identified	5858	7.7	b3b7b10b15b29y10*y19y19*y28*y32	400551	3292	267546650671313	937733253356567	0.2527	Green	12646	35457349	35457349	354713	38744	38744.00	3.90	4	8871892
NCDO2118_RS00110	ATP-dependent zinc metalloprotease FtsH 26105:28192 forward MW:75561	Regular	13127170	0	755608538	56	7	58	13.81	153348	101198	45837	0	2	Pass1	PepFrag1	None	14087907	SDVLDPALLRPGR	SDVLDPALLRPGR	341	13	6.95	825	10	10	7	2	147351900	72865	Identified	21361	5.2	b2b3y3y7y8y9y10y11y12y13	241848	1323	145702229398225	105702229398225	0.2143	Green	7273	14087923	14087930	256814	32869	32869.00	2.49	2	7048998
NCDO2118_RS00110	ATP-dependent zinc metalloprotease FtsH 26105:28192 forward MW:75561	Regular	13127170	0	755608538	56	7	58	13.81	153348	101198	45837	0	3	Pass1	PepFrag1	None	13187253	QELVEVVDFLK	QELVEVVDFLK	202	11	3.83	826	12	12	9	3	349129100	76612		7632	4.1	b2b2*b2b3b3*b4b4*b6b8b11y3y4y5y6y7y8y9y10	349642	1256	140740598584399	100740598584399	0.1372	Green	12719	13187234	13187246	356808	21046	21046.00	2.00	2	6598654
NCDO2118_RS00110	ATP-dependent zinc metalloprotease FtsH 26105:28192 forward MW:75561	Regular	13127170	0	755608538	56	7	58	13.81	153348	101198	45837	0	4	Pass1	PepFrag1	None	8975404	VLVGAPDVK	VLVGAPDVK	358	9	6.78	823	8	8	5	1	206269500	74326	Identified	6975	3.5	b2y2y4y5y5y6y7y8y9	186678	870	110180769869336	701807698693355	0.1013	Green	2507	8975396	8975421	184669	15539	15539.00	1.84	2	4492734
NCDO2118_RS00110	ATP-dependent zinc metalloprotease FtsH 26105:28192 forward MW:75561	Regular	13127170	0	755608538	56	7	58	13.81	153348	101198	45837	0	5	Pass1	PepFrag1	None	8285189	AIAEALLK	AIAEALLK	611	8	7.00	824	7	7	2	1	69990570	69632		1334	2.1	b4b5b6b8y2y6y8	217934	817	105659286072213	171318572144426	0.0280	Green	4924	8285191	8285206	225789	4297	4297.00	1.38	1	8285191
NCDO2118_RS00110	ATP-dependent zinc metalloprotease FtsH 26105:28192 forward MW:75561	Regular	13127170	0	755608538	56	7	58	13.81	153348	101198	45837	0	6	Pass1	PepFrag1	None	17169167	TAPSIIFIDEIDAVGR	TAPSIIFIDEIDAVGR	283	16	3.70	827	3	3	0	1	35812330	66722	Identified	341	1.7	b5y11y14	354782	1613	166283521182289	126283521182289	0.0082	Green	13643	17169130	17169114	382410	1263	1263.00	2.00	2	8589601
NCDO2118_RS00110	ATP-dependent zinc metalloprotease FtsH 26105:28192 forward MW:75561	Regular	13127170	0	755608538	56	7	58	13.81	153348	101198	45837	0	7	Pass2	PepFrag2	None	8394145	YETLDAK	YETLDAK	619	7	4.07	829	2	2	0	0	5386721	58495		1080	4.0	y1y3	144129	760	100685909104663	606859091046631	0.1929	Green	1775	8394144	8394170	167119	29585	29585.00	1.62	2	4202108
NCDO2118_RS00110	ATP-dependent zinc metalloprotease FtsH 26105:28192 forward MW:75561	Regular	13127170	0	755608538	56	7	58	13.81	153348	101198	45837	0	8	Pass2	InSource	None	9945792	DPALLRPGR	SDVLDPALLRPGR	345	9	10.89	825	2	2	0	0	5192769	0.0000	Missing	158	0.0	b5y5	241848	930	115190041098929	751900410989287	0.0359	Green	7253	9945777	9945800	256602	5507	5507.00	2.00	2	4977925
NCDO2118_RS00110	ATP-dependent zinc metalloprotease FtsH 26105:28192 forward MW:75561	Regular	13127170	0	755608538	56	7	58	13.81	153348	101198	45837	0	9	Pass2	InSource	None	5863195	GAPDVK	VLVGAPDVK	361	6	6.78	823	6	6	4	0	211880900	0.0000	Identified	1098	0.0	b5y2y3y4y5y6	186678	536	797754924937232	119550984987446	0.0293	Green	2502	5863160	5863177	184639	4498	4498.00	1.00	1	5863160
NCDO2118_RS00110	ATP-dependent zinc metalloprotease FtsH 26105:28192 forward MW:75561	Regular	8243544	0	755608538	80	18	58	35.25	84885	32343	26855	1	1	Pass1	PepFrag1	None	8664804	QIMSLFK	QIMSLFK	626	7	10.10	3221	11	11	8	3	270961400	73490		4655	3.1	b2b3b4b4b5b7y1y2y3y4y5y6y7	232031	829	106691377218832	666913772188325	0.1753	Green	8796	8664768	8664791	271418	14883	14883.00	1.51	2	4337420
NCDO2118_RS00110	ATP-dependent zinc metalloprotease FtsH 26105:28192 forward MW:75561	Regular	8243544	0	755608538	80	18	58	35.25	84885	32343	26855	0	2	Pass1	PepFrag1	None	35457226	IGGYMLALPDEEIMQPTNFHLQDQLASLMGGR	IGGYMLALPDEEIMQPTNFHLQDQLASLMGGR	483	32	4.06	3228	4	4	0	0	3193486	54204	Missing	2766	4.5	b6b10b18b19b21b29y27*y30	453173	3292	267546650671313	937733253356567	0.1065	Yellow	22398	35457393	35457315	348219	9044	9044.00	4.00	4	8871903
NCDO2118_RS00110	ATP-dependent zinc metalloprotease FtsH 26105:28192 forward MW:75561	Regular	8243544	0	755608538	80	18	58	35.25	84885	32343	26855	0	3	Pass1	PepFrag1	None	8285189	AIAEALLK	AIAEALLK	611	8	7.00	3219	9	9	5	2	96718190	69016		2371	2.6	b3b4b5b6b7y3y5y6y8	245514	817	105659286072213	171318572144426	0.0991	Green	2918	8285191	8285208	216967	8416	8416.00	1.39	1	8285191
NCDO2118_RS00110	ATP-dependent zinc metalloprotease FtsH 26105:28192 forward MW:75561	Regular	8243544	0	755608538	80	18	58	35.25	84885	32343	26855	0	4	Pass1	PepFrag1	None	15948475	NFQAYIIPTDSVVK	NFQAYIIPTDSVVK	99	14	6.78	3225	6	6	3	1	4339104	55535	Identified	683	2.8	b9b10b12*b13y5y6y7y10y14*	320383	1493	157930559037942	652870393586283	0.0693	Yellow	31785	15948428	15948467	414961	5884	5884.00	2.73	3	5322858
NCDO2118_RS00110	ATP-dependent zinc metalloprotease FtsH 26105:28192 forward MW:75561	Regular	8243544	0	755608538	80	18	58	35.25	84885	32343	26855	0	5	Pass1	PepFrag1	None	14058049	IPAGVLLEGPPGTGK	IPAGVLLEGPPGTGK	224	15	7.00	3220	9	9	4	0	123348500	70072	Identified	2273	2.6	b4b8y6y9y10y12y13y14y15	263844	1343	147166956772518	107166956772518	0.0512	Green	7032	14058021	14058033	257118	4342	4342.00	2.00	2	7034047
NCDO2118_RS00110	ATP-dependent zinc metalloprotease FtsH 26105:28192 forward MW:75561	Regular	8243544	0	755608538	80	18	58	35.25	84885	32343	26855	0	6	Pass1	PepFrag1	None	17169167	TAPSIIFIDEIDAVGR	TAPSIIFIDEIDAVGR	283	16	3.70	3223	5	5	1	1	13542020	60478	Identified	2114	2.5	b3b5b14y8y13y13y14	394304	1613	166283521182289	126283521182289	0.0438	Green	27847	17169066	17169063	378007	3715	3715.00	2.00	2	8589569
NCDO2118_RS00110	ATP-dependent zinc metalloprotease FtsH 26105:28192 forward MW:75561	Regular	8243544	0	755608538	80	18	58	35.25	84885	32343	26855	0	7	Pass1	PepFrag1	None	13187253	QELVEVVDFLK	QELVEVVDFLK	202	11	3.83	3222	2	2	0	0	12590090	60161		368	2.2	b5*y4y7	342342	1256	140740598584399	100740598584399	0.0416	Green	23151	13187261	13187277	351835	3531	3531.00	2.00	2	6598667
NCDO2118_RS00110	ATP-dependent zinc metalloprotease FtsH 26105:28192 forward MW:75561	Regular	8243544	0	755608538	80	18	58	35.25	84885	32343	26855	0	8	Pass1	PepFrag1	None	8364149	DLFENAK	DLFENAK	275	7	4.07	3226	1	1	0	0	483494	46005		403	1.6	b3b7y7*	176877	757	10042077156173	160841543123461	0.0278	Red	9554	8364080	8364097	275799	2364	2364.00	1.00	1	8364080
NCDO2118_RS00110	ATP-dependent zinc metalloprotease FtsH 26105:28192 forward MW:75561	Regular	8243544	0	755608538	80	18	58	35.25	84885	32343	26855	0	9	Pass1	PepFrag1	None	22251006	IENVTMQPSDSLITVTGEYK	IENVTMQPSDSLITVTGEYK	57	20	3.83	3224	2	2	0	0	1074481	49473	Missing	336	2.1	b2b9*b15b16*y4y15	319840	2064	195989480989022	155989480989022	0.0216	Red	29731	22251005	22250963	390697	1832	1832.00	2.00	2	11130539
NCDO2118_RS00110	ATP-dependent zinc metalloprotease FtsH 26105:28192 forward MW:75561	Regular	8243544	0	755608538	80	18	58	35.25	84885	32343	26855	0	10	Pass1	PepFrag1	None	18078796	LGMVSYEGDHQVFIGR	LGMVSYEGDHQVFIGR	552	16	5.22	3229	2	2	0	0	1339499	50431		198	1.6	b13y6*y8	279310	1655	169157646025708	129157646025708	0.0135	Red	37362	18078747	18078738	493136	1145	1145.00	2.00	2	9044410
NCDO2118_RS00110	ATP-dependent zinc metalloprotease FtsH 26105:28192 forward MW:75561	Regular	8243544	0	755608538	80	18	58	35.25	84885	32343	26855	0	11	Pass1	PepFrag1	None	39460305	NKPLASDVDLHNVATQTPGYVGADLENVLNEAALVAAR	NKPLASDVDLHNVATQTPGYVGADLENVLNEAALVAAR	378	38	4.20	3227	10	10	1	0	10974850	59565	Missing	1519	2.2	b6*b8*b10b11b14b32b33y3y8y10y10*y11*y13y28*y31y38	474762	3680	288176246240716	104088123120358	0.0119	Green	33294	39460321	39460211	431589	1007	1007.00	4.00	4	9872635
NCDO2118_RS00110	ATP-dependent zinc metalloprotease FtsH 26105:28192 forward MW:75561	Regular	8243544	0	755608538	80	18	58	35.25	84885	32343	26855	0	12	Pass2	PepFrag2	None	10705551	ISYSQLMTK	ISYSQLMTK	43	9	9.72	3236	6	6	2	1	2992462	53921		3346	3.2	b2b5b6b7y3y9	186528	1001	120980586572634	809805865726335	0.1462	Yellow	5363	10705723	10705745	243413	12414	12414.00	2.00	2	5357898
NCDO2118_RS00110	ATP-dependent zinc metalloprotease FtsH 26105:28192 forward MW:75561	Regular	8243544	0	755608538	80	18	58	35.25	84885	32343	26855	0	13	Pass2	PepFrag2	None	14546832	MPDEAAAAEVPEPK	MPDEAAAAEVPEPK	636	14	3.69	3230	1	1	0	0	871850	48566	Identified	90	1.8	y6y13	247265	1320	145481885709551	105481885709551	0.0210	Red	34050	14546982	14546993	440415	1782	1782.00	2.00	2	7278527
NCDO2118_RS00110	ATP-dependent zinc metalloprotease FtsH 26105:28192 forward MW:75561	Regular	8243544	0	755608538	80	18	58	35.25	84885	32343	26855	0	14	Pass2	PepFrag2	None	20460390	LGEEIVFGVATPGASNDIEK	LGEEIVFGVATPGASNDIEK	515	20	3.69	3235	3	3	1	0	9398422	58892	Missing	471	2.0	b20y2y13y14y20	338149	1900	185465030305411	145465030305411	0.0196	Yellow	21150	20460386	20460360	341143	1666	1666.00	2.31	2	10235230
NCDO2118_RS00110	ATP-dependent zinc metalloprotease FtsH 26105:28192 forward MW:75561	Regular	8243544	0	755608538	80	18	58	35.25	84885	32343	26855	0	15	Pass2	MissedCleavage	None	26954050	LGEEIVFGVATPGASNDIEKATHIAR	LGEEIVFGVATPGASNDIEKATHIAR	515	26	4.63	3232	2	2	0	0	9341234	58865	Identified	4366	3.5	b12y15y22*y26	314138	2517	223708135347424	109138756898283	0.0661	Yellow	11086	26954164	26954143	286325	5610	5610.00	3.00	3	8991437
NCDO2118_RS00110	ATP-dependent zinc metalloprotease FtsH 26105:28192 forward MW:75561	Regular	8243544	0	755608538	80	18	58	35.25	84885	32343	26855	0	16	Pass2	MissedCleavage	None	18269872	SDVLDPALLRPGRFDR	SDVLDPALLRPGRFDR	341	16	7.03	3231	1	1	0	0	921548	48806	Identified	114	1.5	y5y6	258133	1697	172007557555126	132007557555126	0.0097	Red	12815	18269915	18269905	296706	820	820.00	2.00	2	9139994
NCDO2118_RS00110	ATP-dependent zinc metalloprotease FtsH 26105:28192 forward MW:75561	Regular	8243544	0	755608538	80	18	58	35.25	84885	32343	26855	0	17	Pass2	VarMod	Phosphoryl STY(7);Phosphoryl STY(23);Phosphoryl STY(24)	30593788	EREIVAYHEAGHAIVGLVLENGSTVR	EREIVAYHEAGHAIVGLVLENGSTVR	448	26	5.30	3233	3	3	0	0	3912456	55086		361	3.3	b6b13b18y21y8-2(H3PO4)	315864	2632	230471320859712	113647547239808	0.0580	Yellow	36892	30593700	30593644	483074	4926	4926.00	2.79	3	10204615
NCDO2118_RS00110	ATP-dependent zinc metalloprotease FtsH 26105:28192 forward MW:75561	Regular	8243544	0	755608538	80	18	58	35.25	84885	32343	26855	0	18	Pass2	VarMod	Oxidation M(4)	34507910	IQSMREREIVAYHEAGHAIVGLVLENGSTVR	IQSMREREIVAYHEAGHAIVGLVLENGSTVR	443	31	6.05	3234	3	3	0	0	1194903	49934		421	2.3	b2b6b12b23b27	311651	3215	263358264970309	135572176646873	0.0177	Red	27406	34508310	34508207	375893	1504	1504.00	3.00	3	11509485
NCDO2118_RS00110	ATP-dependent zinc metalloprotease FtsH 26105:28192 forward MW:75561	Regular	3972754	0	755608538	17	3	58	3.88	26859	33795	8796	1	1	Pass1	PepFrag1	None	14486322	EINAADIDEGMDR	EINAADIDEGMDR	420	13	3.43	422	15	15	11	5	206053900	69131		5804	4.4	b2b2b3b3b4*b5b5*b5b6b6*b6b7b7*b9*y1y2y4y5y6y7y8y9y10y11	204625	1289	143195129239694	103195129239694	0.7749	Green	4448	14486283	14486283	203177	20812	20812.00	2.00	2	7248178
NCDO2118_RS00110	ATP-dependent zinc metalloprotease FtsH 26105:28192 forward MW:75561	Regular	3972754	0	755608538	17	3	58	3.88	26859	33795	8796	0	2	Pass1	PepFrag1	None	15948475	NFQAYIIPTDSVVK	NFQAYIIPTDSVVK	99	14	6.78	423	0	0	0	0	5883058	53687	Missing	32	1.8	y11	326982	1493	157930559037942	117930559037942	0.0640	Yellow	7745	15948491	15948482	422131	1718	1718.00	2.00	2	7979282
NCDO2118_RS00110	ATP-dependent zinc metalloprotease FtsH 26105:28192 forward MW:75561	Regular	3972754	0	755608538	17	3	58	3.88	26859	33795	8796	0	3	Pass2	VarMod	Phosphoryl STY(*)	31423524	TFEESLKDANANVDDFSNINIYNGDEK	TFEESLKDANANVDDFSNINIYNGDEK	650	27	3.63	424	2	2	0	0	2321585	49649		2960	3.2	b9b13-H3PO4y10*y11*y12y13*y27	351517	2750	237309302808562	118206201872375	0.1612	Red	4203	31423487	31423379	191565	4329	4329.00	3.14	3	10481211
NCDO2118_RS00110	ATP-dependent zinc metalloprotease FtsH 26105:28192 forward MW:75561	Regular	22157030	0	755608538	63	9	58	16.98	128430	96279	65356	1	1	Pass1	PepFrag1	None	14087907	SDVLDPALLRPGR	SDVLDPALLRPGR	341	13	6.95	706	11	11	7	2	383553700	79293	Identified	29382	5.8	b2b3b3b4y3y5y6y7y8y9y10y11y12y13	255214	1323	145702229398225	105702229398225	0.3444	Green	8136	14087886	14087900	256975	44235	44235.00	2.50	2	7048980
NCDO2118_RS00110	ATP-dependent zinc metalloprotease FtsH 26105:28192 forward MW:75561	Regular	22157030	0	755608538	63	9	58	16.98	128430	96279	65356	0	2	Pass1	PepFrag1	None	13187253	QELVEVVDFLK	QELVEVVDFLK	202	11	3.83	707	14	14	9	4	474347300	80216		10900	4.7	b2b2*b2b3b3*b3b4b4*b4b6*b6b7b8b9b11y2y3y4y5y6y7y8y9y11	351318	1256	140740598584399	100740598584399	0.2322	Green	14584	13187237	13187257	356433	29824	29824.00	1.98	2	6598655
NCDO2118_RS00110	ATP-dependent zinc metalloprotease FtsH 26105:28192 forward MW:75561	Regular	22157030	0	755608538	63	9	58	16.98	128430	96279	65356	0	3	Pass1	PepFrag1	None	8975404	VLVGAPDVK	VLVGAPDVK	358	9	6.78	703	11	11	7	3	227120800	77018	Identified	9607	3.9	b2b3b7b8y2y3y4y5y6y7y8y9	189205	870	110180769869336	701807698693355	0.1730	Green	2741	8975390	8975423	184541	22220	22220.00	1.81	2	4492731
NCDO2118_RS00110	ATP-dependent zinc metalloprotease FtsH 26105:28192 forward MW:75561	Regular	22157030	0	755608538	63	9	58	16.98	128430	96279	65356	0	4	Pass1	PepFrag1	None	35457226	IGGYMLALPDEEIMQPTNFHLQDQLASLMGGR	IGGYMLALPDEEIMQPTNFHLQDQLASLMGGR	483	32	4.06	710	4	4	1	0	5950322	61201	Missing	10107	5.0	b10b11b17y10y11y11y14*y15*y32	406557	3292	267546650671313	138364433780876	0.0965	Green	15615	35457385	35457208	382520	12399	12399.00	2.95	3	11825843
NCDO2118_RS00110	ATP-dependent zinc metalloprotease FtsH 26105:28192 forward MW:75561	Regular	22157030	0	755608538	63	9	58	16.98	128430	96279	65356	0	5	Pass1	PepFrag1	None	8285189	AIAEALLK	AIAEALLK	611	8	7.00	705	10	10	5	3	123358200	74367		3422	3.0	b2b4b4b6y1y2y3y4y5y6y8	219844	817	105659286072213	171318572144426	0.0961	Green	5526	8285189	8285202	225384	12344	12344.00	1.39	1	8285189
NCDO2118_RS00110	ATP-dependent zinc metalloprotease FtsH 26105:28192 forward MW:75561	Regular	22157030	0	755608538	63	9	58	16.98	128430	96279	65356	0	6	Pass1	PepFrag1	None	17169167	TAPSIIFIDEIDAVGR	TAPSIIFIDEIDAVGR	283	16	3.70	708	8	8	3	2	120687000	74272	Identified	1395	2.4	b5b6b9y5y10y11y13y14y16	363264	1613	166283521182289	126283521182289	0.0256	Green	15609	17169138	17169127	382341	3282	3282.00	2.00	2	8589605
NCDO2118_RS00110	ATP-dependent zinc metalloprotease FtsH 26105:28192 forward MW:75561	Regular	22157030	0	755608538	63	9	58	16.98	128430	96279	65356	0	7	Pass1	PepFrag1	None	5453657	TLLAK	TLLAK	239	5	10.10	709	3	3	1	0	2700641	57770		153	1.2	b2b3y5	134066	543	804685521509633	120937104301927	0.0134	Green	4053	5453646	5453660	205940	1721	1721.00	1.00	1	5453646
NCDO2118_RS00110	ATP-dependent zinc metalloprotease FtsH 26105:28192 forward MW:75561	Regular	22157030	0	755608538	63	9	58	16.98	128430	96279	65356	0	8	Pass1	PepFrag1	None	16997843	TYSEATAVMIDDEVR	TYSEATAVMIDDEVR	574	15	3.59	711	1	1	0	0	1036548	53611		222	1.8	y1y8	264050	1540	161227869348147	121227869348147	0.0119	Yellow	7036	16997826	16997817	243926	1534	1534.00	2.37	2	8503949
NCDO2118_RS00110	ATP-dependent zinc metalloprotease FtsH 26105:28192 forward MW:75561	Regular	22157030	0	755608538	63	9	58	16.98	128430	96279	65356	0	9	Pass1	PepFrag1	None	10915844	VRDLFENAK	VRDLFENAK	273	9	7.03	704	1	1	0	0	1523853	55285		168	1.2	b7b8y7y9*	171868	1010	12170466260244	817046626024404	0.0068	Yellow	2769	10915831	10915860	184898	871	871.00	2.00	2	5462952
NCDO2118_RS00110	ATP-dependent zinc metalloprotease FtsH 26105:28192 forward MW:75561	Regular	6717368	0	755608538	31	8	58	6.76	51362	33251	18337	1	1	Pass1	PepFrag1	None	14486322	EINAADIDEGMDR	EINAADIDEGMDR	420	13	3.43	480	15	15	11	5	316741400	73279		11750	5.0	b2b2b3b3b4b4*b4b5b5*b5b6b6*b6y2y4y5y6y7y8y9y10y11y11*y13	197936	1289	143195129239694	103195129239694	0.5801	Green	5009	14486270	14486270	202239	29794	29794.00	2.00	2	7248172
NCDO2118_RS00110	ATP-dependent zinc metalloprotease FtsH 26105:28192 forward MW:75561	Regular	6717368	0	755608538	31	8	58	6.76	51362	33251	18337	0	2	Pass1	PepFrag1	None	10024599	GAGLGGGNDER	GAGLGGGNDER	301	11	4.07	479	2	2	1	0	20023540	61287		472	1.9	y6y7	106856	875	110602515085444	706025150854443	0.0503	Yellow	1327	10024541	10024556	104626	2586	2586.00	2.00	2	5017307
NCDO2118_RS00110	ATP-dependent zinc metalloprotease FtsH 26105:28192 forward MW:75561	Regular	6717368	0	755608538	31	8	58	6.76	51362	33251	18337	0	3	Pass1	PepFrag1	None	8554319	EAIETHR	EAIETHR	600	7	5.30	478	3	3	2	0	7468107	57004		208	1.1	y3y4y5	41772	768	101391243059154	613912430591538	0.0170	Yellow	1068	8554262	8554279	96831	871	871.00	2.00	2	4282167
NCDO2118_RS00110	ATP-dependent zinc metalloprotease FtsH 26105:28192 forward MW:75561	Regular	6717368	0	755608538	31	8	58	6.76	51362	33251	18337	0	4	Pass1	PepFrag1	None	17169167	TAPSIIFIDEIDAVGR	TAPSIIFIDEIDAVGR	283	16	3.70	481	3	3	1	0	12136020	59113	Identified	403	1.4	y9y10y14	377372	1613	166283521182289	126283521182289	0.0150	Yellow	7944	17169272	17169256	383747	772	772.00	2.00	2	8589672
NCDO2118_RS00110	ATP-dependent zinc metalloprotease FtsH 26105:28192 forward MW:75561	Regular	6717368	0	755608538	31	8	58	6.76	51362	33251	18337	0	5	Pass2	PepFrag2	None	11325013	SMVTEYGMSK	SMVTEYGMSK	541	10	6.89	485	3	3	0	0	2107441	51510		4429	2.9	b5b5b7b9y10	168506	1025	12290669611554	829066961155399	0.1730	Red	2779	11324736	11324748	137184	8888	8888.00	1.92	2	5667404
NCDO2118_RS00110	ATP-dependent zinc metalloprotease FtsH 26105:28192 forward MW:75561	Regular	6717368	0	755608538	31	8	58	6.76	51362	33251	18337	0	6	Pass2	PepFrag2	None	26783593	IENVTMQPSDSLITVTGEYKEPVK	IENVTMQPSDSLITVTGEYKEPVK	57	24	4.16	484	2	2	0	0	2631074	52473	Missing	81	1.7	y8y10	311748	2503	222877828243123	108585218828749	0.0159	Red	9354	26783588	26783525	481713	816	816.00	3.00	3	8934578
NCDO2118_RS00110	ATP-dependent zinc metalloprotease FtsH 26105:28192 forward MW:75561	Regular	6717368	0	755608538	31	8	58	6.76	51362	33251	18337	0	7	Pass2	MissedCleavage	None	26954050	LGEEIVFGVATPGASNDIEKATHIAR	LGEEIVFGVATPGASNDIEKATHIAR	515	26	4.63	483	2	2	0	0	4473041	54778	Identified	903	3.1	b11y26	328463	2517	223708135347424	718540676737121	0.0760	Red	6536	26954007	26954007	298260	3906	3906.00	3.74	4	6746056
NCDO2118_RS00110	ATP-dependent zinc metalloprotease FtsH 26105:28192 forward MW:75561	Regular	6717368	0	755608538	31	8	58	6.76	51362	33251	18337	0	8	Pass2	MissedCleavage	None	13656328	GGGGGGNPMSFGKSR	GGGGGGNPMSFGKSR	164	15	11.49	482	1	1	0	0	479125	45076	Missing	91	2.5	b10y15*	125789	1210	137282932554542	972829325545422	0.0726	Red	4468	13656190	13656194	179854	3729	3729.00	2.00	2	6833132
NCDO2118_RS00110	ATP-dependent zinc metalloprotease FtsH 26105:28192 forward MW:75561	Regular	29116160	0	755608538	98	16	58	26.33	309786	190052	153441	1	1	Pass1	PepFrag1	None	14087907	SDVLDPALLRPGR	SDVLDPALLRPGR	341	13	6.95	761	13	13	8	4	308193200	79530	Identified	72629	7.6	b2b3b3b4b6b7y3y4y6y8y9y9y10y11y12y13	235040	1323	145702229398225	105702229398225	0.3056	Green	11515	14087911	14087915	255183	94658	94658.00	2.50	2	7048992
NCDO2118_RS00110	ATP-dependent zinc metalloprotease FtsH 26105:28192 forward MW:75561	Regular	29116160	0	755608538	98	16	58	26.33	309786	190052	153441	0	2	Pass1	PepFrag1	None	13187253	QELVEVVDFLK	QELVEVVDFLK	202	11	3.83	762	14	14	11	4	573297900	82225		14106	5.8	b2b2*b2b3b3*b3b4*b4b5b5b6b6*b7b8y2y3y4y5y6y7y7y8y9y10y11y11*	342486	1256	140740598584399	100740598584399	0.1702	Green	21744	13187254	13187262	355834	52740	52740.00	1.97	2	6598663
NCDO2118_RS00110	ATP-dependent zinc metalloprotease FtsH 26105:28192 forward MW:75561	Regular	29116160	0	755608538	98	16	58	26.33	309786	190052	153441	0	3	Pass1	PepFrag1	None	8285189	AIAEALLK	AIAEALLK	611	8	7.00	760	13	13	10	6	604734700	82457		14078	4.8	b2b3b4b4b5b5b6b7y1y2y3y4y5y5y6y8	221551	817	105659286072213	171318572144426	0.1377	Green	7643	8285207	8285217	224861	42654	42654.00	1.31	1	8285207
NCDO2118_RS00110	ATP-dependent zinc metalloprotease FtsH 26105:28192 forward MW:75561	Regular	29116160	0	755608538	98	16	58	26.33	309786	190052	153441	0	4	Pass1	PepFrag1	None	8975404	VLVGAPDVK	VLVGAPDVK	358	9	6.78	759	12	12	8	3	271780800	78984	Identified	20439	4.6	b2b5b7y1y2y3y4y5y6y7y7y8y9	183046	870	110180769869336	701807698693355	0.1114	Green	3495	8975410	8975428	183999	34503	34503.00	1.70	2	4492741
NCDO2118_RS00110	ATP-dependent zinc metalloprotease FtsH 26105:28192 forward MW:75561	Regular	29116160	0	755608538	98	16	58	26.33	309786	190052	153441	0	5	Pass1	PepFrag1	None	11815321	FADVAGSEEEK	FADVAGSEEEK	191	11	3.69	765	2	2	0	0	3217021	59716		273	3.0	b3b4b11y7	174957	1048	124738491959315	847384919593145	0.0288	Green	6647	11815382	11815394	216144	8912	8912.00	2.00	2	5912727
NCDO2118_RS00110	ATP-dependent zinc metalloprotease FtsH 26105:28192 forward MW:75561	Regular	29116160	0	755608538	98	16	58	26.33	309786	190052	153441	0	6	Pass1	PepFrag1	None	35457226	IGGYMLALPDEEIMQPTNFHLQDQLASLMGGR	IGGYMLALPDEEIMQPTNFHLQDQLASLMGGR	483	32	4.06	769	2	2	0	0	5957908	62392	Identified	351	4.4	b29*y11y13y16y17*	406094	3292	267546650671313	138364433780876	0.0272	Green	23638	35457484	35457311	385073	8412	8412.00	3.00	3	11825876
NCDO2118_RS00110	ATP-dependent zinc metalloprotease FtsH 26105:28192 forward MW:75561	Regular	29116160	0	755608538	98	16	58	26.33	309786	190052	153441	0	7	Pass1	PepFrag1	None	17169167	TAPSIIFIDEIDAVGR	TAPSIIFIDEIDAVGR	283	16	3.70	763	8	8	3	2	110653800	75081	Identified	3567	3.4	b5b5b6b15y2y7y9y10y11y14y16	356963	1613	166283521182289	126283521182289	0.0270	Green	23437	17169174	17169160	381332	8352	8352.00	2.00	2	8589623
NCDO2118_RS00110	ATP-dependent zinc metalloprotease FtsH 26105:28192 forward MW:75561	Regular	29116160	0	755608538	98	16	58	26.33	309786	190052	153441	0	8	Pass1	PepFrag1	None	5453657	TLLAK	TLLAK	239	5	10.10	766	5	5	2	2	60029910	72425		811	1.8	b2b3y2y3y5	131151	543	804685521509633	120937104301927	0.0145	Green	5471	5453641	5453653	205241	4487	4487.00	1.00	1	5453641
NCDO2118_RS00110	ATP-dependent zinc metalloprotease FtsH 26105:28192 forward MW:75561	Regular	29116160	0	755608538	98	16	58	26.33	309786	190052	153441	0	9	Pass1	PepFrag1	None	14486322	EINAADIDEGMDR	EINAADIDEGMDR	420	13	3.43	768	1	1	0	0	740559	53337		70	1.5	y3	218920	1289	143195129239694	554634194931295	0.0039	Yellow	10813	14486190	14486237	249157	1194	1194.00	3.00	3	4835445
NCDO2118_RS00110	ATP-dependent zinc metalloprotease FtsH 26105:28192 forward MW:75561	Regular	29116160	0	755608538	98	16	58	26.33	309786	190052	153441	0	10	Pass2	PepFrag2	None	8364149	DLFENAK	DLFENAK	275	7	4.07	767	2	2	1	0	2175826	58018		1661	1.9	y6y7	177918	757	10042077156173	160841543123461	0.0126	Yellow	5833	8364240	8364250	208923	3912	3912.00	1.00	1	8364240
NCDO2118_RS00110	ATP-dependent zinc metalloprotease FtsH 26105:28192 forward MW:75561	Regular	29116160	0	755608538	98	16	58	26.33	309786	190052	153441	0	11	Pass2	PepFrag2	None	22251006	IENVTMQPSDSLITVTGEYK	IENVTMQPSDSLITVTGEYK	57	20	3.83	764	6	6	1	1	15876370	66649	Identified	1416	2.1	b11b13b13b14y7y13y14y20	295385	2064	195989480989022	155989480989022	0.0055	Green	15460	22250773	22250717	289807	1715	1715.00	2.00	2	11130423
NCDO2118_RS00110	ATP-dependent zinc metalloprotease FtsH 26105:28192 forward MW:75561	Regular	29116160	0	755608538	98	16	58	26.33	309786	190052	153441	0	12	Pass2	VarMod	Oxidation M(9)	13816277	GGGGGGNPMSFGKSR	GGGGGGNPMSFGKSR	164	15	11.49	773	2	2	0	0	2120376	57905	Missing	542	2.7	b13*y7y15	117020	1210	137282932554542	972829325545422	0.0159	Yellow	25211	13816289	13816294	430903	4931	4931.00	1.64	2	6913181
NCDO2118_RS00110	ATP-dependent zinc metalloprotease FtsH 26105:28192 forward MW:75561	Regular	29116160	0	755608538	98	16	58	26.33	309786	190052	153441	0	13	Pass2	VarMod	Oxidation M(14)	35617175	IGGYMLALPDEEIMQPTNFHLQDQLASLMGGR	IGGYMLALPDEEIMQPTNFHLQDQLASLMGGR	483	32	4.06	772	4	4	2	0	7248638	63244	Identified	3958	3.6	b9b10y17y31y32	406094	3292	267546650671313	138364433780876	0.0153	Green	22318	35617430	35617254	364307	4732	4732.00	3.09	3	11879192
NCDO2118_RS00110	ATP-dependent zinc metalloprotease FtsH 26105:28192 forward MW:75561	Regular	29116160	0	755608538	98	16	58	26.33	309786	190052	153441	0	14	Pass2	VarMod	Oxidation M(5)	35617175	IGGYMLALPDEEIMQPTNFHLQDQLASLMGGR	IGGYMLALPDEEIMQPTNFHLQDQLASLMGGR	483	32	4.06	771	6	6	1	0	8794880	64084	Identified	2880	3.3	b3b12b15b19*b25b26b27y7y11y12y13y15*y16y16*y17y20	406094	3292	267546650671313	138364433780876	0.0126	Green	21504	35617119	35616944	351698	3906	3906.00	3.46	3	11879088
NCDO2118_RS00110	ATP-dependent zinc metalloprotease FtsH 26105:28192 forward MW:75561	Regular	29116160	0	755608538	98	16	58	26.33	309786	190052	153441	0	15	Pass2	VarMod	Phosphoryl STY(11)	24151955	NFQAYIIPTDSVVKDIQNAAK	NFQAYIIPTDSVVKDIQNAAK	99	21	6.84	770	2	2	0	0	1513734	56442	Missing	228	1.7	b10y13y13*	310070	2187	20370052870765	958003524717666	0.0032	Yellow	19168	24151992	24151980	324399	976	976.00	3.00	3	8057379
NCDO2118_RS00110	ATP-dependent zinc metalloprotease FtsH 26105:28192 forward MW:75561	Regular	29116160	0	755608538	98	16	58	26.33	309786	190052	153441	0	16	Pass2	VarMod	Phosphoryl STY(9)	15166679	VRFADVAGSEEEK	VRFADVAGSEEEK	189	13	4.16	774	1	1	0	0	1469308	56312		112	1.3	b9b11	171183	1301	144082476723823	104082476723823	0.0026	Yellow	14926	15166705	15166704	285049	809	809.00	2.00	2	7588389
NCDO2118_RS00110	ATP-dependent zinc metalloprotease FtsH 26105:28192 forward MW:75561	Regular	29116160	0	755608538	98	16	58	26.33	309786	190052	153441	0	17	Pass2	InSource	None	12067317	VLDPALLRPGR	SDVLDPALLRPGR	343	11	10.89	761	4	4	0	1	22682000	0.0000	Identified	16181	0.0	b8y3y8y11	235040	1159	13339777673557	933977767355698	0.0894	Green	11506	12067286	12067297	255143	27692	27692.00	2.15	2	6038679
NCDO2118_RS00110	ATP-dependent zinc metalloprotease FtsH 26105:28192 forward MW:75561	Regular	29116160	0	755608538	98	16	58	26.33	309786	190052	153441	0	18	Pass2	InSource	None	8795523	PALLRPGR	SDVLDPALLRPGR	346	8	12.40	761	1	1	0	0	927183	0.0000	Identified	139	0.0	b5	235040	839	107547654026365	675476540263647	0.0132	Green	11540	8795469	8795488	255312	4094	4094.00	2.00	2	4402771
NCDO2118_RS00110	ATP-dependent zinc metalloprotease FtsH 26105:28192 forward MW:75561	Regular	29116160	0	755608538	98	16	58	26.33	309786	190052	153441	0	19	Pass2	InSource	None	3021347	SDV	SDVLDPALLRPGR	341	3	3.10	761	0	0	0	0	84689	0.0000		0	0.0		235040	269	503803469737673	607606939475345	0.0036	Green	11505	3021342	3021351	255141	1107	1107.00	1.00	1	3021342
NCDO2118_RS00110	ATP-dependent zinc metalloprotease FtsH 26105:28192 forward MW:75561	Regular	15266920	0	755608538	70	12	58	23.31	207136	125471	52985	1	1	Pass1	PepFrag1	None	35457226	IGGYMLALPDEEIMQPTNFHLQDQLASLMGGR	IGGYMLALPDEEIMQPTNFHLQDQLASLMGGR	483	32	4.06	940	6	6	1	1	5636876	59348	Identified	12184	9.8	b6b10b11b15*b19b19b22*b29b29y13y21*	395791	3292	267546650671313	937733253356567	0.3664	Green	16313	35457185	35457185	352140	75899	75899.00	3.99	4	8871851
NCDO2118_RS00110	ATP-dependent zinc metalloprotease FtsH 26105:28192 forward MW:75561	Regular	15266920	0	755608538	70	12	58	23.31	207136	125471	52985	0	2	Pass1	PepFrag1	None	14087907	SDVLDPALLRPGR	SDVLDPALLRPGR	341	13	6.95	934	12	12	5	4	161315100	73914	Identified	23912	5.2	b2b3b3b5b7b7y3y5y6y8y9y10y11y13	237839	1323	145702229398225	571348195988164	0.1611	Green	8940	14087909	14087944	255056	33366	33366.00	2.60	3	4702685
NCDO2118_RS00110	ATP-dependent zinc metalloprotease FtsH 26105:28192 forward MW:75561	Regular	15266920	0	755608538	70	12	58	23.31	207136	125471	52985	0	3	Pass1	PepFrag1	None	13187253	QELVEVVDFLK	QELVEVVDFLK	202	11	3.83	936	12	12	8	3	199634400	74840		5883	3.8	b2b2*b2b3b3*b3b4b4*b4b5*b11y1y4y5y6y7y8y9y10	344510	1256	140740598584399	100740598584399	0.0782	Green	16467	13187266	13187282	355830	16206	16206.00	2.00	2	6598669
NCDO2118_RS00110	ATP-dependent zinc metalloprotease FtsH 26105:28192 forward MW:75561	Regular	15266920	0	755608538	70	12	58	23.31	207136	125471	52985	0	4	Pass1	PepFrag1	None	8975404	VLVGAPDVK	VLVGAPDVK	358	9	6.78	939	9	9	5	2	184643000	74501	Identified	5857	3.5	b2b5y2y3y4y5y5y6y7y8y9	183490	870	110180769869336	701807698693355	0.0756	Green	2928	8975383	8975409	184517	15650	15650.00	1.83	2	4492728
NCDO2118_RS00110	ATP-dependent zinc metalloprotease FtsH 26105:28192 forward MW:75561	Regular	15266920	0	755608538	70	12	58	23.31	207136	125471	52985	0	5	Pass1	PepFrag1	None	16638286	GTNNFPLLGNSSSEVK	GTNNFPLLGNSSSEVK	83	16	7.00	935	5	5	1	1	9845721	61770	Identified	686	4.2	b4b9b14*b15*y5y7y8y9*y11y13	250876	1518	159688686462042	664591243080279	0.0713	Green	12110	16638372	16638401	291328	14767	14767.00	2.78	3	5552839
NCDO2118_RS00110	ATP-dependent zinc metalloprotease FtsH 26105:28192 forward MW:75561	Regular	15266920	0	755608538	70	12	58	23.31	207136	125471	52985	0	6	Pass1	PepFrag1	None	8285189	AIAEALLK	AIAEALLK	611	8	7.00	933	10	10	7	3	487305500	78716		2426	2.6	b4b5b6b7y2y3y4y5y6y8	222259	817	105659286072213	171318572144426	0.0395	Green	6120	8285171	8285185	224838	8191	8191.00	1.34	1	8285171
NCDO2118_RS00110	ATP-dependent zinc metalloprotease FtsH 26105:28192 forward MW:75561	Regular	15266920	0	755608538	70	12	58	23.31	207136	125471	52985	0	7	Pass1	PepFrag1	None	17169167	TAPSIIFIDEIDAVGR	TAPSIIFIDEIDAVGR	283	16	3.70	937	4	4	1	0	24733110	65770	Identified	831	1.9	b5b14y10y11y13y14	353881	1613	166283521182289	126283521182289	0.0079	Green	17561	17169123	17169116	381505	1634	1634.00	2.00	2	8589598
NCDO2118_RS00110	ATP-dependent zinc metalloprotease FtsH 26105:28192 forward MW:75561	Regular	15266920	0	755608538	70	12	58	23.31	207136	125471	52985	0	8	Pass2	PepFrag2	None	15948475	NFQAYIIPTDSVVK	NFQAYIIPTDSVVK	99	14	6.78	938	0	0	0	0	1683293	54099	Missing	34	1.7	y8	305029	1493	157930559037942	117930559037942	0.0067	Yellow	18072	15948501	15948502	396495	1395	1395.00	2.00	2	7979287
NCDO2118_RS00110	ATP-dependent zinc metalloprotease FtsH 26105:28192 forward MW:75561	Regular	15266920	0	755608538	70	12	58	23.31	207136	125471	52985	0	9	Pass2	VarMod	Oxidation M(7)	16138203	ISYSQLMTKLDGNK	ISYSQLMTKLDGNK	43	14	9.63	943	3	3	0	0	1520423	53657		531	4.9	b9b13*y10*y12y14	190826	1495	158071568477359	118071568477359	0.1269	Yellow	5582	16138144	16138144	219126	26291	26291.00	2.00	2	8074108
NCDO2118_RS00110	ATP-dependent zinc metalloprotease FtsH 26105:28192 forward MW:75561	Regular	15266920	0	755608538	70	12	58	23.31	207136	125471	52985	0	10	Pass2	VarMod	Phosphoryl STY(3)	17668434	YETLDAKQIMSLFK	YETLDAKQIMSLFK	619	14	6.95	944	2	2	0	0	1697367	54135		228	2.2	b4-H3PO4b9y11*y12	292465	1589	164629969982005	124629969982005	0.0134	Yellow	8500	17668557	17668546	249925	2772	2772.00	2.63	2	8839315
NCDO2118_RS00110	ATP-dependent zinc metalloprotease FtsH 26105:28192 forward MW:75561	Regular	15266920	0	755608538	70	12	58	23.31	207136	125471	52985	0	11	Pass2	VarMod	Oxidation M(5)	35617175	IGGYMLALPDEEIMQPTNFHLQDQLASLMGGR	IGGYMLALPDEEIMQPTNFHLQDQLASLMGGR	483	32	4.06	942	3	3	0	0	1478029	53534	Missing	123	2.3	b7b12y12	395791	3292	267546650671313	138364433780876	0.0067	Yellow	17565	35617422	35617296	381549	1380	1380.00	3.00	3	11879189
NCDO2118_RS00110	ATP-dependent zinc metalloprotease FtsH 26105:28192 forward MW:75561	Regular	15266920	0	755608538	70	12	58	23.31	207136	125471	52985	0	12	Pass2	VarMod	Phosphoryl STY(13)	14857712	IPAGVLLEGPPGTGK	IPAGVLLEGPPGTGK	224	15	7.00	941	2	2	0	0	1459058	53478	Identified	172	1.4	b10b12y7	248347	1343	147166956772518	107166956772518	0.0041	Yellow	15024	14857674	14857681	329752	857	857.00	2.00	2	7433873
NCDO2118_RS00110	ATP-dependent zinc metalloprotease FtsH 26105:28192 forward MW:75561	Regular	15266920	0	755608538	70	12	58	23.31	207136	125471	52985	0	13	Pass2	InSource	None	9945792	DPALLRPGR	SDVLDPALLRPGR	345	9	10.89	934	0	0	0	0	715172	0.0000	Missing	0	0.0		237839	930	115190041098929	751900410989287	0.0339	Green	8946	9945710	9945735	255113	7020	7020.00	2.00	2	4977891
NCDO2118_RS00110	ATP-dependent zinc metalloprotease FtsH 26105:28192 forward MW:75561	Regular	15266920	0	755608538	70	12	58	23.31	207136	125471	52985	0	14	Pass2	InSource	None	8795523	PALLRPGR	SDVLDPALLRPGR	346	8	12.40	934	2	2	0	0	721964	0.0000	Identified	118	0.0	b2b5	237839	839	107547654026365	675476540263647	0.0082	Green	8948	8795459	8795485	255119	1708	1708.00	2.00	2	4402766
NCDO2118_RS00110	ATP-dependent zinc metalloprotease FtsH 26105:28192 forward MW:75561	Regular	1600441	0	755608538	20	9	58	7.34	36996	8164	14543	1	1	Pass1	PepFrag1	None	14486322	EINAADIDEGMDR	EINAADIDEGMDR	420	13	3.43	618	9	9	6	3	55091330	59453		1588	2.9	b2b3b3b4b4*y4y7y8y9y10y10y11	197776	1289	143195129239694	103195129239694	0.1769	Red	3804	14486278	14486280	203357	6543	6543.00	2.00	2	7248176
NCDO2118_RS00110	ATP-dependent zinc metalloprotease FtsH 26105:28192 forward MW:75561	Regular	1600441	0	755608538	20	9	58	7.34	36996	8164	14543	0	2	Pass1	PepFrag1	None	26783593	IENVTMQPSDSLITVTGEYKEPVK	IENVTMQPSDSLITVTGEYKEPVK	57	24	4.16	619	1	1	0	0	6558577	50210	Identified	73	1.7	y17	305525	2503	222877828243123	108585218828749	0.0233	Red	7925	26783666	26783609	483166	862	862.00	3.00	3	8934604
NCDO2118_RS00110	ATP-dependent zinc metalloprotease FtsH 26105:28192 forward MW:75561	Regular	1600441	0	755608538	20	9	58	7.34	36996	8164	14543	0	3	Pass1	PepFrag1	None	15948475	NFQAYIIPTDSVVK	NFQAYIIPTDSVVK	99	14	6.78	620	1	1	0	0	1135128	42593	Missing	192	1.3	b8*b9b9	300544	1493	157930559037942	117930559037942	0.0205	Red	7212	15948437	15948427	417518	759	759.00	2.00	2	7979255
NCDO2118_RS00110	ATP-dependent zinc metalloprotease FtsH 26105:28192 forward MW:75561	Regular	1600441	0	755608538	20	9	58	7.34	36996	8164	14543	0	4	Pass2	PepFrag2	None	9194778	IQSMRER	IQSMRER	443	7	10.89	626	1	1	0	0	2921798	46699		5206	2.8	y5y7	30264	840	1076330940749	1752661881498	0.2997	Red	2769	9194374	9194381	161511	11088	11088.00	1.00	1	9194374
NCDO2118_RS00110	ATP-dependent zinc metalloprotease FtsH 26105:28192 forward MW:75561	Regular	1600441	0	755608538	20	9	58	7.34	36996	8164	14543	0	5	Pass2	PepFrag2	None	11325013	SMVTEYGMSK	SMVTEYGMSK	541	10	6.89	625	5	5	1	0	6666613	50281		2585	2.4	b1b9b10y7y7y10	184477	1025	12290669611554	829066961155399	0.1367	Red	2073	11324716	11324734	138280	5059	5059.00	2.00	2	5667394
NCDO2118_RS00110	ATP-dependent zinc metalloprotease FtsH 26105:28192 forward MW:75561	Regular	1600441	0	755608538	20	9	58	7.34	36996	8164	14543	0	6	Pass2	PepFrag2	None	35457226	IGGYMLALPDEEIMQPTNFHLQDQLASLMGGR	IGGYMLALPDEEIMQPTNFHLQDQLASLMGGR	483	32	4.06	622	1	1	0	0	2795458	46507	Missing	51	2.2	b17	440675	3292	267546650671313	138364433780876	0.0329	Red	6613	35457319	35457159	385478	1216	1216.00	3.00	3	11825822
NCDO2118_RS00110	ATP-dependent zinc metalloprotease FtsH 26105:28192 forward MW:75561	Regular	1600441	0	755608538	20	9	58	7.34	36996	8164	14543	0	7	Pass2	PepFrag2	None	11815321	FADVAGSEEEK	FADVAGSEEEK	191	11	3.69	621	1	1	0	0	4204365	48279		41	1.4	y9	152923	1048	124738491959315	847384919593145	0.0280	Red	3209	11815355	11815371	174409	1035	1035.00	2.00	2	5912714
NCDO2118_RS00110	ATP-dependent zinc metalloprotease FtsH 26105:28192 forward MW:75561	Regular	1600441	0	755608538	20	9	58	7.34	36996	8164	14543	0	8	Pass2	MissedCleavage	None	13656328	GGGGGGNPMSFGKSR	GGGGGGNPMSFGKSR	164	15	11.49	623	0	0	0	0	1749419	44471	Missing	154	2.2	b8*y11y14	126746	1210	137282932554542	972829325545422	0.0704	Red	3354	13656141	13656148	181678	2603	2603.00	2.00	2	6833107
NCDO2118_RS00110	ATP-dependent zinc metalloprotease FtsH 26105:28192 forward MW:75561	Regular	1600441	0	755608538	20	9	58	7.34	36996	8164	14543	0	9	Pass2	VarMod	Phosphoryl STY(*)	31423524	TFEESLKDANANVDDFSNINIYNGDEK	TFEESLKDANANVDDFSNINIYNGDEK	650	27	3.63	624	1	1	0	0	3054210	46891		4653	4.0	b10*b13*y10y15*y17y27	348566	2750	237309302808562	118206201872375	0.2117	Red	3546	31423560	31423453	191540	7831	7831.00	3.13	3	10481235
NCDO2118_RS00110	ATP-dependent zinc metalloprotease FtsH 26105:28192 forward MW:75561	Regular	9037358	0	755608538	56	11	58	24.17	124051	71641	53337	1	1	Pass1	PepFrag1	None	35457226	IGGYMLALPDEEIMQPTNFHLQDQLASLMGGR	IGGYMLALPDEEIMQPTNFHLQDQLASLMGGR	483	32	4.06	974	5	5	0	0	15964720	61592	Identified	23922	7.4	b8b11b13b19y15*y18*y30y32	397593	3292	267546650671313	138364433780876	0.2884	Green	16529	35457426	35457258	382605	35777	35777.00	3.19	3	11825857
NCDO2118_RS00110	ATP-dependent zinc metalloprotease FtsH 26105:28192 forward MW:75561	Regular	9037358	0	755608538	56	11	58	24.17	124051	71641	53337	0	2	Pass1	PepFrag1	None	14087907	SDVLDPALLRPGR	SDVLDPALLRPGR	341	13	6.95	970	8	8	4	2	115821600	70198	Identified	13177	4.2	b2b3b3y3y8y9y9y10y11y13	243603	1323	145702229398225	105702229398225	0.1523	Green	8625	14087897	14087908	256057	18896	18896.00	2.51	2	7048985
NCDO2118_RS00110	ATP-dependent zinc metalloprotease FtsH 26105:28192 forward MW:75561	Regular	9037358	0	755608538	56	11	58	24.17	124051	71641	53337	0	3	Pass1	PepFrag1	None	13187253	QELVEVVDFLK	QELVEVVDFLK	202	11	3.83	972	9	9	3	2	109894200	69970		5166	3.8	b2b2*b2b3b3*b4b4*b6*b11y4y5y7y9y11	352622	1256	140740598584399	100740598584399	0.1368	Green	15406	13187241	13187257	356073	16968	16968.00	2.00	2	6598657
NCDO2118_RS00110	ATP-dependent zinc metalloprotease FtsH 26105:28192 forward MW:75561	Regular	9037358	0	755608538	56	11	58	24.17	124051	71641	53337	0	4	Pass1	PepFrag1	None	8975404	VLVGAPDVK	VLVGAPDVK	358	9	6.78	968	10	10	7	2	251863100	73572	Identified	6341	3.4	b2b5b7y2y3y4y5y5y6y7y7y8y9	186369	870	110180769869336	701807698693355	0.1188	Green	2916	8975377	8975404	184170	14739	14739.00	1.81	2	4492725
NCDO2118_RS00110	ATP-dependent zinc metalloprotease FtsH 26105:28192 forward MW:75561	Regular	9037358	0	755608538	56	11	58	24.17	124051	71641	53337	0	5	Pass1	PepFrag1	None	11325013	SMVTEYGMSK	SMVTEYGMSK	541	10	6.89	975	0	0	0	0	1464712	51218		53	2.3	y5	163161	1025	12290669611554	829066961155399	0.0363	Yellow	3101	11324936	11324959	186614	4502	4502.00	2.00	2	5667504
NCDO2118_RS00110	ATP-dependent zinc metalloprotease FtsH 26105:28192 forward MW:75561	Regular	9037358	0	755608538	56	11	58	24.17	124051	71641	53337	0	6	Pass1	PepFrag1	None	8285189	AIAEALLK	AIAEALLK	611	8	7.00	969	5	5	1	1	58753370	67251		1021	1.9	b4b5y3y6y8	220200	817	105659286072213	171318572144426	0.0279	Green	6034	8285195	8285204	225067	3465	3465.00	1.38	1	8285195
NCDO2118_RS00110	ATP-dependent zinc metalloprotease FtsH 26105:28192 forward MW:75561	Regular	9037358	0	755608538	56	11	58	24.17	124051	71641	53337	0	7	Pass1	PepFrag1	None	22251006	IENVTMQPSDSLITVTGEYK	IENVTMQPSDSLITVTGEYK	57	20	3.83	971	4	4	1	0	4199849	55793	Missing	543	2.0	b6*b9b12b13b13b16b19*y4y7y8y20*	292500	2064	195989480989022	155989480989022	0.0129	Yellow	10509	22251091	22251027	278805	1602	1602.00	2.45	2	11130582
NCDO2118_RS00110	ATP-dependent zinc metalloprotease FtsH 26105:28192 forward MW:75561	Regular	9037358	0	755608538	56	11	58	24.17	124051	71641	53337	0	8	Pass1	PepFrag1	None	17169167	TAPSIIFIDEIDAVGR	TAPSIIFIDEIDAVGR	283	16	3.70	973	2	2	0	0	13758530	60946	Identified	317	1.8	b5y14	362697	1613	166283521182289	126283521182289	0.0126	Green	16493	17169054	17169044	381531	1558	1558.00	2.00	2	8589564
NCDO2118_RS00110	ATP-dependent zinc metalloprotease FtsH 26105:28192 forward MW:75561	Regular	9037358	0	755608538	56	11	58	24.17	124051	71641	53337	0	9	Pass2	VarMod	Oxidation M(7)	16138203	ISYSQLMTKLDGNK	ISYSQLMTKLDGNK	43	14	9.63	977	2	2	0	0	2016294	52606		334	3.7	b7b11y14	184662	1495	158071568477359	118071568477359	0.0952	Yellow	5447	16138155	16138153	219033	11808	11808.00	2.00	2	8074114
NCDO2118_RS00110	ATP-dependent zinc metalloprotease FtsH 26105:28192 forward MW:75561	Regular	9037358	0	755608538	56	11	58	24.17	124051	71641	53337	0	10	Pass2	VarMod	Oxidation M(10)	17028720	YETLDAKQIMSLFK	YETLDAKQIMSLFK	619	14	6.95	978	1	1	0	0	2747126	53949		94	2.3	b9*y5	277210	1589	164629969982005	124629969982005	0.0272	Yellow	11083	17028689	17028680	286371	3373	3373.00	2.00	2	8519381
NCDO2118_RS00110	ATP-dependent zinc metalloprotease FtsH 26105:28192 forward MW:75561	Regular	9037358	0	755608538	56	11	58	24.17	124051	71641	53337	0	11	Pass2	VarMod	Phosphoryl STY(*)	24151955	NFQAYIIPTDSVVKDIQNAAK	NFQAYIIPTDSVVKDIQNAAK	99	21	6.84	976	1	1	0	0	2237906	53059	Identified	438	1.9	b6*b15-H3PO4y5y14*	305401	2187	20370052870765	958003524717666	0.0101	Yellow	8289	24151919	24151898	251949	1259	1259.00	3.00	3	8057355
NCDO2118_RS00110	ATP-dependent zinc metalloprotease FtsH 26105:28192 forward MW:75561	Regular	9037358	0	755608538	56	11	58	24.17	124051	71641	53337	0	12	Pass2	InSource	None	5863195	GAPDVK	VLVGAPDVK	361	6	6.78	968	5	5	2	0	102888200	0.0000	Identified	1065	0.0	b5y2y4y5y6	186369	536	797754924937232	119550984987446	0.0409	Green	2912	5863205	5863218	184144	5078	5078.00	1.00	1	5863205
NCDO2118_RS00110	ATP-dependent zinc metalloprotease FtsH 26105:28192 forward MW:75561	Regular	9037358	0	755608538	56	11	58	24.17	124051	71641	53337	0	13	Pass2	InSource	None	9945792	DPALLRPGR	SDVLDPALLRPGR	345	9	10.89	970	0	0	0	0	973828	0.0000	Missing	0	0.0		243603	930	115190041098929	751900410989287	0.0229	Green	8622	9945804	9945830	256016	2844	2844.00	2.00	2	4977938
NCDO2118_RS00110	ATP-dependent zinc metalloprotease FtsH 26105:28192 forward MW:75561	Regular	9037358	0	755608538	56	11	58	24.17	124051	71641	53337	0	14	Pass2	InSource	None	7984720	LVGAPDVK	VLVGAPDVK	359	8	6.78	968	4	4	0	0	73626290	0.0000	Identified	866	0.0	y2y4y6y8	186369	765	101127031163723	162254062327446	0.0176	Green	2913	7984721	7984731	184160	2182	2182.00	1.22	1	7984721
NCDO2118_RS00110	ATP-dependent zinc metalloprotease FtsH 26105:28192 forward MW:75561	Regular	6929058	0	755608538	58	14	58	17.70	360349	291062	203428	1	1	Pass1	PepFrag1	None	8534302	TFEESLK	TFEESLK	650	7	4.26	3380	4	4	2	0	14962430	60157		179400	6.0	b7y5y6y7	162127	778	102269476338066	164538952676133	0.7549	Yellow	11642	8534225	8534250	274131	272041	272041.00	1.03	1	8534225
NCDO2118_RS00110	ATP-dependent zinc metalloprotease FtsH 26105:28192 forward MW:75561	Regular	6929058	0	755608538	58	14	58	17.70	360349	291062	203428	0	2	Pass1	PepFrag1	None	8285189	AIAEALLK	AIAEALLK	611	8	7.00	3372	12	12	10	4	340957000	73734		2998	2.8	b3b4b5b6b6y1y2y3y4y5y6y7y8	235950	817	105659286072213	171318572144426	0.0277	Green	3470	8285191	8285216	213711	9964	9964.00	1.35	1	8285191
NCDO2118_RS00110	ATP-dependent zinc metalloprotease FtsH 26105:28192 forward MW:75561	Regular	6929058	0	755608538	58	14	58	17.70	360349	291062	203428	0	3	Pass1	PepFrag1	None	8664804	QIMSLFK	QIMSLFK	626	7	10.10	3374	9	9	5	3	106180100	68667		2600	2.6	b2b3b4b5b7y2y3y4y5y6y7	249530	829	106691377218832	173382754437665	0.0251	Green	10844	8664744	8664770	270317	9057	9057.00	1.47	1	8664744
NCDO2118_RS00110	ATP-dependent zinc metalloprotease FtsH 26105:28192 forward MW:75561	Regular	6929058	0	755608538	58	14	58	17.70	360349	291062	203428	0	4	Pass1	PepFrag1	None	15948475	NFQAYIIPTDSVVK	NFQAYIIPTDSVVK	99	14	6.78	3376	0	0	0	0	1162279	49060	Missing	202	3.1	b5*b6*b9	320150	1493	157930559037942	117930559037942	0.0215	Red	42715	15948440	15948456	457080	7745	7745.00	2.06	2	7979256
NCDO2118_RS00110	ATP-dependent zinc metalloprotease FtsH 26105:28192 forward MW:75561	Regular	6929058	0	755608538	58	14	58	17.70	360349	291062	203428	0	5	Pass1	PepFrag1	None	17169167	TAPSIIFIDEIDAVGR	TAPSIIFIDEIDAVGR	283	16	3.70	3375	6	6	2	0	7355093	57073	Missing	1270	2.9	b4b5b5b10y1y5y9y10y15y16	381606	1613	166283521182289	126283521182289	0.0147	Yellow	33440	17169030	17169041	376485	5289	5289.00	2.06	2	8589551
NCDO2118_RS00110	ATP-dependent zinc metalloprotease FtsH 26105:28192 forward MW:75561	Regular	6929058	0	755608538	58	14	58	17.70	360349	291062	203428	0	6	Pass1	PepFrag1	None	14058049	IPAGVLLEGPPGTGK	IPAGVLLEGPPGTGK	224	15	7.00	3373	10	10	5	0	68285340	66750	Identified	2214	2.6	b5y2y6y7y8y8y9y11y13y14y15	241411	1343	147166956772518	107166956772518	0.0117	Green	8615	14057944	14057966	256050	4230	4230.00	2.00	2	7034009
NCDO2118_RS00110	ATP-dependent zinc metalloprotease FtsH 26105:28192 forward MW:75561	Regular	6929058	0	755608538	58	14	58	17.70	360349	291062	203428	0	7	Pass1	PepFrag1	None	13187253	QELVEVVDFLK	QELVEVVDFLK	202	11	3.83	3377	0	0	0	0	2614798	52581		43	2.1	b3*	362971	1256	140740598584399	100740598584399	0.0096	Red	27979	13187264	13187287	350948	3445	3445.00	2.00	2	6598668
NCDO2118_RS00110	ATP-dependent zinc metalloprotease FtsH 26105:28192 forward MW:75561	Regular	6929058	0	755608538	58	14	58	17.70	360349	291062	203428	0	8	Pass1	PepFrag1	None	8364149	DLFENAK	DLFENAK	275	7	4.07	3378	1	1	0	0	1602941	50456		1517	1.7	y4*y7y7*	163557	757	10042077156173	160841543123461	0.0078	Red	7768	8364128	8364153	249879	2805	2805.00	1.21	1	8364128
NCDO2118_RS00110	ATP-dependent zinc metalloprotease FtsH 26105:28192 forward MW:75561	Regular	6929058	0	755608538	58	14	58	17.70	360349	291062	203428	0	9	Pass2	PepFrag2	None	20460390	LGEEIVFGVATPGASNDIEK	LGEEIVFGVATPGASNDIEK	515	20	3.69	3379	1	1	0	0	2091173	51611	Missing	228	1.6	y7y14*y17*y17	334547	1900	185465030305411	145465030305411	0.0025	Red	24988	20460213	20460206	336659	918	918.00	2.00	2	10235143
NCDO2118_RS00110	ATP-dependent zinc metalloprotease FtsH 26105:28192 forward MW:75561	Regular	6929058	0	755608538	58	14	58	17.70	360349	291062	203428	0	10	Pass2	MissedCleavage	None	7985196	KVTVVPR	KVTVVPR	474	7	11.49	3381	2	2	0	0	8302374	57599	Missing	9540	3.7	y3y7	219679	781	102532211203983	165064422407966	0.0652	Yellow	4724	7985190	7985215	225123	23500	23500.00	1.37	1	7985190
NCDO2118_RS00110	ATP-dependent zinc metalloprotease FtsH 26105:28192 forward MW:75561	Regular	6929058	0	755608538	58	14	58	17.70	360349	291062	203428	0	11	Pass2	MissedCleavage	None	26954050	LGEEIVFGVATPGASNDIEKATHIAR	LGEEIVFGVATPGASNDIEKATHIAR	515	26	4.63	3382	0	0	0	0	3289910	53579	Missing	49	1.9	y12*	317345	2517	223708135347424	109138756898283	0.0030	Red	14946	26953994	26953983	292261	1083	1083.00	3.00	3	8991380
NCDO2118_RS00110	ATP-dependent zinc metalloprotease FtsH 26105:28192 forward MW:75561	Regular	6929058	0	755608538	58	14	58	17.70	360349	291062	203428	0	12	Pass2	VarMod	Oxidation M(4)	34507910	IQSMREREIVAYHEAGHAIVGLVLENGSTVR	IQSMREREIVAYHEAGHAIVGLVLENGSTVR	443	31	6.05	3384	8	8	2	0	4949503	55352		2455	4.9	b3b5b6b8*b8b11*b13b20b23b29*y4y5y5y6y14y16y17*y20y24*y31	333678	3215	263358264970309	916791324851544	0.0333	Yellow	31331	34508120	34508072	366235	12008	12008.00	3.96	4	8634585
NCDO2118_RS00110	ATP-dependent zinc metalloprotease FtsH 26105:28192 forward MW:75561	Regular	6929058	0	755608538	58	14	58	17.70	360349	291062	203428	0	13	Pass2	VarMod	Phosphoryl STY(13);Phosphoryl STY(16)	20920854	IPAGVLLEGPPGTGKTLLAK	IPAGVLLEGPPGTGKTLLAK	224	20	9.88	3385	2	2	0	1	1340229	49679	Missing	277	3.3	b8b12b17-H3PO4y8y9-H3PO4	312455	1886	184552851495267	830352343301779	0.0169	Red	42028	20920692	20920720	450124	6105	6105.00	2.87	3	6980279
NCDO2118_RS00110	ATP-dependent zinc metalloprotease FtsH 26105:28192 forward MW:75561	Regular	6929058	0	755608538	58	14	58	17.70	360349	291062	203428	0	14	Pass2	VarMod	Oxidation M(6)	26943542	IENVTMQPSDSLITVTGEYKEPVK	IENVTMQPSDSLITVTGEYKEPVK	57	24	4.16	3383	1	1	0	0	828523	47590	Missing	98	1.9	b3b3*	308173	2503	222877828243123	491511312972493	0.0031	Red	4438	26943528	26943528	223424	1107	1107.00	5.00	5	5396764
NCDO2118_RS00110	ATP-dependent zinc metalloprotease FtsH 26105:28192 forward MW:75561	Regular	6929058	0	755608538	58	14	58	17.70	360349	291062	203428	0	15	Pass2	InSource	None	6253378	MSLFK	QIMSLFK	628	5	10.10	3374	2	2	0	0	253103	0.0000		537	0.0	b2b3y2	249530	591	851434586985685	130286917397137	0.0029	Green	10874	6253379	6253402	270402	1052	1052.00	1.00	1	6253379
NCDO2118_RS00110	ATP-dependent zinc metalloprotease FtsH 26105:28192 forward MW:75561	Regular	3896796	0.68	755608538	62	19	58	24.32	624749	547099	391022	1	1	Pass1	PepFrag1	None	8534302	TFEESLK	TFEESLK	650	7	4.26	6411	5	5	2	0	13020520	57053		352048	6.0	b2b3b4b7y6y7	156267	778	102269476338066	164538952676133	0.8243	Yellow	14785	8534227	8534248	269774	514993	514993.00	1.03	1	8534227
NCDO2118_RS00110	ATP-dependent zinc metalloprotease FtsH 26105:28192 forward MW:75561	Regular	3896796	0.68	755608538	62	19	58	24.32	624749	547099	391022	0	2	Pass1	PepFrag1	None	8664804	QIMSLFK	QIMSLFK	626	7	10.10	6410	5	5	2	0	85467300	65225		2847	3.3	b1b7y3y4y5	236932	829	106691377218832	666913772188325	0.0273	Green	13820	8664780	8664806	266079	17051	17051.00	2.00	2	4337426
NCDO2118_RS00110	ATP-dependent zinc metalloprotease FtsH 26105:28192 forward MW:75561	Regular	3896796	0.68	755608538	62	19	58	24.32	624749	547099	391022	0	3	Pass1	PepFrag1	None	17169167	TAPSIIFIDEIDAVGR	TAPSIIFIDEIDAVGR	283	16	3.70	6404	3	3	0	0	25413080	59958	Identified	2985	4.2	b4b4b5b12y5y14	383182	1613	166283521182289	126283521182289	0.0241	Yellow	40446	17169148	17169154	373301	15055	15055.00	2.05	2	8589611
NCDO2118_RS00110	ATP-dependent zinc metalloprotease FtsH 26105:28192 forward MW:75561	Regular	3896796	0.68	755608538	62	19	58	24.32	624749	547099	391022	0	4	Pass1	PepFrag1	None	14087907	SDVLDPALLRPGR	SDVLDPALLRPGR	341	13	6.95	6408	5	5	1	1	25104060	59905	Identified	8128	3.7	b2b7y8y10y11y13	233610	1323	145702229398225	571348195988164	0.0210	Yellow	9922	14087762	14087803	246629	13134	13134.00	2.56	3	4702636
NCDO2118_RS00110	ATP-dependent zinc metalloprotease FtsH 26105:28192 forward MW:75561	Regular	3896796	0.68	755608538	62	19	58	24.32	624749	547099	391022	0	5	Pass1	PepFrag1	None	14058049	IPAGVLLEGPPGTGK	IPAGVLLEGPPGTGK	224	15	7.00	6402	8	8	3	0	39623250	61887	Identified	4565	3.5	b3b5b11y2y6y7y8y13y14y15	243434	1343	147166956772518	107166956772518	0.0149	Green	11209	14057939	14057957	254012	9329	9329.00	2.00	2	7034006
NCDO2118_RS00110	ATP-dependent zinc metalloprotease FtsH 26105:28192 forward MW:75561	Regular	3896796	0.68	755608538	62	19	58	24.32	624749	547099	391022	0	6	Pass1	PepFrag1	None	39460305	NKPLASDVDLHNVATQTPGYVGADLENVLNEAALVAAR	NKPLASDVDLHNVATQTPGYVGADLENVLNEAALVAAR	378	38	4.20	6409	4	4	0	0	8096529	54990	Missing	2046	4.2	b12b22b31*y3y6y9y11y12y12*y14y17*y24	375705	3680	288176246240716	104088123120358	0.0102	Red	47685	39460450	39460388	424387	6387	6387.00	3.72	4	9872667
NCDO2118_RS00110	ATP-dependent zinc metalloprotease FtsH 26105:28192 forward MW:75561	Regular	3896796	0.68	755608538	62	19	58	24.32	624749	547099	391022	0	7	Pass1	PepFrag1	None	14546832	MPDEAAAAEVPEPK	MPDEAAAAEVPEPK	636	14	3.69	6401	3	3	0	0	3799835	51705	Identified	942	2.5	b10y2y3y7y10	210801	1320	145481885709551	569879238063675	0.0062	Red	6387	14546783	14546823	226931	3904	3904.00	2.91	3	4855643
NCDO2118_RS00110	ATP-dependent zinc metalloprotease FtsH 26105:28192 forward MW:75561	Regular	3896796	0.68	755608538	62	19	58	24.32	624749	547099	391022	0	8	Pass1	PepFrag1	None	20460390	LGEEIVFGVATPGASNDIEK	LGEEIVFGVATPGASNDIEK	515	20	3.69	6403	3	3	0	0	8972161	55436	Identified	1138	1.9	b3b5b6y9*y9y11	339940	1900	185465030305411	145465030305411	0.0023	Yellow	31065	20460239	20460225	334953	1453	1453.00	2.25	2	10235156
NCDO2118_RS00110	ATP-dependent zinc metalloprotease FtsH 26105:28192 forward MW:75561	Regular	3896796	0.68	755608538	62	19	58	24.32	624749	547099	391022	0	9	Pass1	PepFrag1	None	15948475	NFQAYIIPTDSVVK	NFQAYIIPTDSVVK	99	14	6.78	6406	1	1	0	0	2147797	49227	Identified	58	1.6	b7	310291	1493	157930559037942	117930559037942	0.0019	Red	52875	15948455	15948466	472855	1188	1188.00	2.00	2	7979264
NCDO2118_RS00110	ATP-dependent zinc metalloprotease FtsH 26105:28192 forward MW:75561	Regular	3896796	0.68	755608538	62	19	58	24.32	624749	547099	391022	0	10	Pass2	PepFrag2	None	8364149	DLFENAK	DLFENAK	275	7	4.07	6407	1	1	0	0	762251	44728		2686	1.9	b4y4y7	164405	757	10042077156173	160841543123461	0.0059	Red	8380	8364211	8364232	238945	3690	3690.00	1.00	1	8364211
NCDO2118_RS00110	ATP-dependent zinc metalloprotease FtsH 26105:28192 forward MW:75561	Regular	3896796	0.68	755608538	62	19	58	24.32	624749	547099	391022	0	11	Pass2	PepFrag2	None	10705551	ISYSQLMTK	ISYSQLMTK	43	9	9.72	6405	2	2	0	0	4577433	52513		393	1.6	b6y8	186850	1001	120980586572634	809805865726335	0.0029	Red	3054	10705650	10705674	200731	1820	1820.00	2.00	2	5357861
NCDO2118_RS00110	ATP-dependent zinc metalloprotease FtsH 26105:28192 forward MW:75561	Regular	3896796	0.68	755608538	62	19	58	24.32	624749	547099	391022	0	12	Pass2	PepFrag2	None	18558855	TYSEATAVMIDDEVRR	TYSEATAVMIDDEVRR	574	16	4.06	6419	2	2	0	0	4664789	52595		1084	1.7	y9y16	234846	1688	171398860006321	131398860006321	0.0019	Red	8366	18558611	18558609	238874	1185	1185.00	2.00	2	9284342
NCDO2118_RS00110	ATP-dependent zinc metalloprotease FtsH 26105:28192 forward MW:75561	Regular	3896796	0.68	755608538	62	19	58	24.32	624749	547099	391022	0	13	Pass2	MissedCleavage	None	16579159	QELVEVVDFLKNPK	QELVEVVDFLKNPK	202	14	4.44	6413	1	1	0	0	1901150	48697	Missing	1978	4.1	y3*y7	283583	1577	163800075051383	692000500342552	0.0262	Red	7955	16579082	16579117	236529	16355	16355.00	3.00	3	5533076
NCDO2118_RS00110	ATP-dependent zinc metalloprotease FtsH 26105:28192 forward MW:75561	Regular	3896796	0.68	755608538	62	19	58	24.32	624749	547099	391022	0	14	Pass2	MissedCleavage	None	27523710	LDGNKIENVTMQPSDSLITVTGEYK	LDGNKIENVTMQPSDSLITVTGEYK	52	25	4.06	6412	2	2	0	0	1728529	48284	Missing	135	2.2	b10b13	308511	2558	2261309432483	110753962165533	0.0027	Red	21911	27523514	27523476	298318	1703	1703.00	3.00	3	9181220
NCDO2118_RS00110	ATP-dependent zinc metalloprotease FtsH 26105:28192 forward MW:75561	Regular	3896796	0.68	755608538	62	19	58	24.32	624749	547099	391022	0	15	Pass2	VarMod	Phosphoryl STY(*)	27423974	EIVAYHEAGHAIVGLVLENGSTVRK	EIVAYHEAGHAIVGLVLENGSTVRK	450	25	6.04	6414	9	9	3	1	10980340	56313		6524	4.4	b2b4b4b5b6b10b10b13b15b23*y8y11y12y12*y15-H3PO4y21*y25	294299	2510	22329317476201	18329317476201	0.0179	Yellow	40072	27424006	27423928	371620	11163	11163.00	2.29	2	13717039
NCDO2118_RS00110	ATP-dependent zinc metalloprotease FtsH 26105:28192 forward MW:75561	Regular	3896796	0.68	755608538	62	19	58	24.32	624749	547099	391022	0	16	Pass2	VarMod	Phosphoryl STY(2)	9635135	VTVVPRGR	VTVVPRGR	475	8	12.40	6416	3	3	0	0	2380597	49674	Identified	991	1.8	b3b4-H3PO4b5y4y8	13571	842	10780387253151	175607745063021	0.0045	Red	14385	9635066	9635085	267764	2781	2781.00	1.41	1	9635066
NCDO2118_RS00110	ATP-dependent zinc metalloprotease FtsH 26105:28192 forward MW:75561	Regular	3896796	0.68	755608538	62	19	58	24.32	624749	547099	391022	0	17	Pass2	VarMod	Phosphoryl STY(9);Phosphoryl STY(11)	18088482	AIAEALLKYETLDAK	AIAEALLKYETLDAK	611	15	4.44	6417	3	3	0	0	2893579	50521		804	1.9	b10b12b12-H3PO4y13	297010	1577	163800075051383	123800075051383	0.0029	Red	40077	18088522	18088523	371636	1788	1788.00	2.00	2	9049297
NCDO2118_RS00110	ATP-dependent zinc metalloprotease FtsH 26105:28192 forward MW:75561	Regular	3896796	0.68	755608538	62	19	58	24.32	624749	547099	391022	0	18	Pass2	VarMod	Phosphoryl STY(4)	19709583	VKGTNNFPLLGNSSSEVK	VKGTNNFPLLGNSSSEVK	81	18	9.88	6415	0	0	0	0	6662238	54143	Identified	1372	1.6	b7-H3PO4b10*b11-H3PO4b15y9*	214944	1758	176105214097747	77403476065165	0.0015	Red	26131	19709531	19709553	314805	964	964.00	3.00	3	6576559
NCDO2118_RS00110	ATP-dependent zinc metalloprotease FtsH 26105:28192 forward MW:75561	Regular	3896796	0.68	755608538	62	19	58	24.32	624749	547099	391022	0	19	Pass2	VarMod	Oxidation M(3)	11686394	QIMSLFKTGK	QIMSLFKTGK	626	10	10.60	6418	2	2	0	0	1398293	47363		298	1.2	b5b8y9	174531	1105	129221413175377	892214131753769	0.0013	Red	2489	11686338	11686362	193746	806	806.00	2.00	2	5848206
NCDO2118_RS00110	ATP-dependent zinc metalloprotease FtsH 26105:28192 forward MW:75561	Regular	360032	1.27	755608538	15	5	58	4.75	20170	15055.5	7754	1	1	Pass1	PepFrag1	None	14486322	EINAADIDEGMDR	EINAADIDEGMDR	420	13	3.43	278	9	9	5	2	16053460	47619		1457	2.8	b2b3b4*b6b13y4y6y7y8y9y10y11	203195	1289	143195129239694	103195129239694	0.3151	Red	3971	14486237	14486237	203195	6355	6355.00	2.00	2	7248155
NCDO2118_RS00110	ATP-dependent zinc metalloprotease FtsH 26105:28192 forward MW:75561	Regular	360032	1.27	755608538	15	5	58	4.75	20170	15055.5	7754	0	2	Pass1	PepFrag1	None	20460390	LGEEIVFGVATPGASNDIEK	LGEEIVFGVATPGASNDIEK	515	20	3.69	279	0	0	0	0	1560699	37497	Missing	111	2.7	b8	393274	1900	185465030305411	836433535369406	0.1825	Red	6153	20460511	20460511	393274	3682	3682.00	2.52	3	6826885
NCDO2118_RS00110	ATP-dependent zinc metalloprotease FtsH 26105:28192 forward MW:75561	Regular	360032	1.27	755608538	15	5	58	4.75	20170	15055.5	7754	0	3	Pass2	PepFrag2	None	11325013	SMVTEYGMSK	SMVTEYGMSK	541	10	6.89	282	3	3	0	0	1031306	35697		3755	2.6	b7b10y1y10	138201	1025	12290669611554	829066961155399	0.3036	Red	2364	11324760	11324760	138201	6123	6123.00	2.00	2	5667416
NCDO2118_RS00110	ATP-dependent zinc metalloprotease FtsH 26105:28192 forward MW:75561	Regular	360032	1.27	755608538	15	5	58	4.75	20170	15055.5	7754	0	4	Pass2	MissedCleavage	None	13656328	GGGGGGNPMSFGKSR	GGGGGGNPMSFGKSR	164	15	11.49	280	0	0	0	0	1405598	37042	Missing	40	1.7	y10	181169	1210	137282932554542	972829325545422	0.0616	Red	3622	13656222	13656222	181169	1243	1243.00	2.00	2	6833148
NCDO2118_RS00110	ATP-dependent zinc metalloprotease FtsH 26105:28192 forward MW:75561	Regular	360032	1.27	755608538	15	5	58	4.75	20170	15055.5	7754	0	5	Pass2	VarMod	Phosphoryl STY(*)	31423524	TFEESLKDANANVDDFSNINIYNGDEK	TFEESLKDANANVDDFSNINIYNGDEK	650	27	3.63	281	3	3	0	0	3311426	40764		2391	2.7	b10b11b12b14*b26-H3PO4y13y21y27	192355	2750	237309302808562	118206201872375	0.1372	Red	3791	31423405	31423405	192355	2767	2767.00	3.09	3	10481184
NCDO2118_RS00110	ATP-dependent zinc metalloprotease FtsH 26105:28192 forward MW:75561	Regular	2262133	1.32	755608538	41	13	58	9.93	83717	33850	36925	1	1	Pass1	PepFrag1	None	8975404	VLVGAPDVK	VLVGAPDVK	358	9	6.78	3253	8	8	3	2	105101700	63761	Identified	13188	4.4	b2b5y2y3y4y5y6y7y8y9	183890	870	110180769869336	701807698693355	0.3506	Green	5843	8975413	8975441	184642	29353	29353.00	1.62	2	4492743
NCDO2118_RS00110	ATP-dependent zinc metalloprotease FtsH 26105:28192 forward MW:75561	Regular	2262133	1.32	755608538	41	13	58	9.93	83717	33850	36925	0	2	Pass1	PepFrag1	None	10705551	ISYSQLMTK	ISYSQLMTK	43	9	9.72	3252	2	2	0	0	5596163	51024		2492	1.9	b2y5*y6*y8*y9	183138	1001	120980586572634	201961173145267	0.0365	Yellow	4782	10705641	10705645	175246	3059	3059.00	1.17	1	10705641
NCDO2118_RS00110	ATP-dependent zinc metalloprotease FtsH 26105:28192 forward MW:75561	Regular	2262133	1.32	755608538	41	13	58	9.93	83717	33850	36925	0	3	Pass1	PepFrag1	None	11224997	GGGGGGNPMSFGK	GGGGGGNPMSFGK	164	13	10.10	3251	5	5	1	1	17476040	55970	Missing	525	1.7	b3y3y4y4y10y13	161057	989	120011766568736	800117665687363	0.0172	Yellow	3822	11224962	11224986	166726	1438	1438.00	2.00	2	5617518
NCDO2118_RS00110	ATP-dependent zinc metalloprotease FtsH 26105:28192 forward MW:75561	Regular	2262133	1.32	755608538	41	13	58	9.93	83717	33850	36925	0	4	Pass1	PepFrag1	None	16638286	GTNNFPLLGNSSSEVK	GTNNFPLLGNSSSEVK	83	16	7.00	3254	1	1	0	0	5752957	51144	Missing	434	1.5	b16y8	257850	1518	159688686462042	119688686462042	0.0108	Yellow	11890	16638432	16638427	231755	902	902.00	2.00	2	8324252
NCDO2118_RS00110	ATP-dependent zinc metalloprotease FtsH 26105:28192 forward MW:75561	Regular	2262133	1.32	755608538	41	13	58	9.93	83717	33850	36925	0	5	Pass2	PepFrag2	None	8534302	TFEESLK	TFEESLK	650	7	4.26	3263	4	4	1	0	5419843	50885		15220	3.8	b1b3b3b7y6y7	174121	778	102269476338066	164538952676133	0.3131	Red	6275	8534064	8534078	188443	26213	26213.00	1.11	1	8534064
NCDO2118_RS00110	ATP-dependent zinc metalloprotease FtsH 26105:28192 forward MW:75561	Regular	2262133	1.32	755608538	41	13	58	9.93	83717	33850	36925	0	6	Pass2	PepFrag2	None	25001925	LGMVSYEGDHQVFIGRDYGQTK	LGMVSYEGDHQVFIGRDYGQTK	552	22	5.28	3261	5	5	1	0	2912105	48187		488	3.6	b6b8b13b13*b14b16y2y10*y12	264919	2277	209251375398959	646256876994797	0.0830	Red	20685	25001999	25001999	331434	6948	6948.00	3.94	4	6258054
NCDO2118_RS00110	ATP-dependent zinc metalloprotease FtsH 26105:28192 forward MW:75561	Regular	2262133	1.32	755608538	41	13	58	9.93	83717	33850	36925	0	7	Pass2	PepFrag2	None	10915844	VRDLFENAK	VRDLFENAK	273	9	7.03	3255	1	1	0	0	2494146	47514		377	1.8	b6y7	186227	1010	12170466260244	817046626024404	0.0320	Red	6149	10915691	10915715	187248	2683	2683.00	2.00	2	5462882
NCDO2118_RS00110	ATP-dependent zinc metalloprotease FtsH 26105:28192 forward MW:75561	Regular	2262133	1.32	755608538	41	13	58	9.93	83717	33850	36925	0	8	Pass2	PepFrag2	None	22279738	DANANVDDFSNINIYNGDEK	DANANVDDFSNINIYNGDEK	657	20	3.37	3260	5	5	0	0	5612596	51037		2099	2.1	b2b12b14y3y4y6y11y17y20y20*	272790	1972	190121358094478	150121358094478	0.0201	Yellow	18213	22280124	22280061	291874	1685	1685.00	2.34	2	11145098
NCDO2118_RS00110	ATP-dependent zinc metalloprotease FtsH 26105:28192 forward MW:75561	Regular	2262133	1.32	755608538	41	13	58	9.93	83717	33850	36925	0	9	Pass2	PepFrag2	None	8394145	YETLDAK	YETLDAK	619	7	4.07	3256	2	2	0	0	451523	40092		103	1.1	b4y7	139961	760	100685909104663	606859091046631	0.0094	Red	8353	8394028	8394056	205362	787	787.00	2.00	2	4202050
NCDO2118_RS00110	ATP-dependent zinc metalloprotease FtsH 26105:28192 forward MW:75561	Regular	2262133	1.32	755608538	41	13	58	9.93	83717	33850	36925	0	10	Pass2	PepFrag2	None	8364149	DLFENAK	DLFENAK	275	7	4.07	3262	2	2	0	1	2400132	47348		193	1.0	b4b6y1y4*	171921	757	10042077156173	160841543123461	0.0090	Red	6879	8363780	8363794	193790	750	750.00	1.00	1	8363780
NCDO2118_RS00110	ATP-dependent zinc metalloprotease FtsH 26105:28192 forward MW:75561	Regular	2262133	1.32	755608538	41	13	58	9.93	83717	33850	36925	0	11	Pass2	MissedCleavage	None	13656328	GGGGGGNPMSFGKSR	GGGGGGNPMSFGKSR	164	15	11.49	3257	4	4	0	1	13637410	54893	Identified	1470	3.1	b4b13y8y11y15	148150	1210	137282932554542	972829325545422	0.0866	Yellow	5606	13656430	13656443	182809	7249	7249.00	2.26	2	6833251
NCDO2118_RS00110	ATP-dependent zinc metalloprotease FtsH 26105:28192 forward MW:75561	Regular	2262133	1.32	755608538	41	13	58	9.93	83717	33850	36925	0	12	Pass2	MissedCleavage	None	20749532	EINAADIDEGMDRAMAGPAK	EINAADIDEGMDRAMAGPAK	420	20	3.86	3258	1	1	0	0	5034406	50565	Missing	112	1.6	y18y20*	247086	1887	18461808180503	830787212033531	0.0103	Red	15444	20749426	20749434	262952	861	861.00	3.00	3	6923190
NCDO2118_RS00110	ATP-dependent zinc metalloprotease FtsH 26105:28192 forward MW:75561	Regular	2262133	1.32	755608538	41	13	58	9.93	83717	33850	36925	0	13	Pass2	VarMod	Phosphoryl STY(*)	13845991	TDSKPEENKEK	TDSKPEENKEK	677	11	4.65	3259	1	1	0	0	165403	35731	Missing	224	1.7	y2y6*	49980	1175	134622673773012	946226737730121	0.0214	Red	19123	13845876	13845889	304211	1789	1789.00	2.00	2	6927974
NCDO2118_RS00110	ATP-dependent zinc metalloprotease FtsH 26105:28192 forward MW:75561	Regular	3118589	1.77	755608538	48	18	58	20.86	100307	42918	23269	1	1	Pass1	PepFrag1	None	8664804	QIMSLFK	QIMSLFK	626	7	10.10	5005	8	8	5	2	150815700	66724		4770	3.4	b3b3*b4b4*b4b5*b6b7y3y4y5y6y7y7*	243468	829	106691377218832	173382754437665	0.1945	Green	9646	8664821	8664838	267886	19514	19514.00	1.51	1	8664821
NCDO2118_RS00110	ATP-dependent zinc metalloprotease FtsH 26105:28192 forward MW:75561	Regular	3118589	1.77	755608538	48	18	58	20.86	100307	42918	23269	0	2	Pass1	PepFrag1	None	35457226	IGGYMLALPDEEIMQPTNFHLQDQLASLMGGR	IGGYMLALPDEEIMQPTNFHLQDQLASLMGGR	483	32	4.06	5011	8	8	1	0	4370540	51345	Missing	9281	4.9	b7b10b11y1y5y7y9y13y14y32	458793	3292	267546650671313	138364433780876	0.1170	Red	29665	35457346	35457204	378424	11737	11737.00	3.04	3	11825830
NCDO2118_RS00110	ATP-dependent zinc metalloprotease FtsH 26105:28192 forward MW:75561	Regular	3118589	1.77	755608538	48	18	58	20.86	100307	42918	23269	0	3	Pass1	PepFrag1	None	15948475	NFQAYIIPTDSVVK	NFQAYIIPTDSVVK	99	14	6.78	5007	0	0	0	0	8687231	54328	Identified	346	3.7	y7y14*	325805	1493	157930559037942	117930559037942	0.1163	Yellow	34330	15948477	15948485	423765	11667	11667.00	2.00	2	7979275
NCDO2118_RS00110	ATP-dependent zinc metalloprotease FtsH 26105:28192 forward MW:75561	Regular	3118589	1.77	755608538	48	18	58	20.86	100307	42918	23269	0	4	Pass1	PepFrag1	None	17169167	TAPSIIFIDEIDAVGR	TAPSIIFIDEIDAVGR	283	16	3.70	5009	4	4	0	0	8527123	54248	Missing	1343	2.9	b5b5y6y10y16	385943	1613	166283521182289	126283521182289	0.0543	Yellow	29277	17169234	17169235	376468	5444	5444.00	2.05	2	8589653
NCDO2118_RS00110	ATP-dependent zinc metalloprotease FtsH 26105:28192 forward MW:75561	Regular	3118589	1.77	755608538	48	18	58	20.86	100307	42918	23269	0	5	Pass1	PepFrag1	None	13187253	QELVEVVDFLK	QELVEVVDFLK	202	11	3.83	5006	3	3	0	0	8178698	54066		514	2.2	b2b3*y3y6y7	353908	1256	140740598584399	100740598584399	0.0349	Yellow	24672	13187216	13187235	350899	3500	3500.00	1.78	2	6598644
NCDO2118_RS00110	ATP-dependent zinc metalloprotease FtsH 26105:28192 forward MW:75561	Regular	3118589	1.77	755608538	48	18	58	20.86	100307	42918	23269	0	6	Pass1	PepFrag1	None	16638286	GTNNFPLLGNSSSEVK	GTNNFPLLGNSSSEVK	83	16	7.00	5004	3	3	0	0	11328070	55481	Identified	1126	1.9	b5b8*b16y8y11*y12y12*	249093	1518	159688686462042	119688686462042	0.0158	Yellow	9501	16638188	16638192	266763	1587	1587.00	2.57	2	8324130
NCDO2118_RS00110	ATP-dependent zinc metalloprotease FtsH 26105:28192 forward MW:75561	Regular	3118589	1.77	755608538	48	18	58	20.86	100307	42918	23269	0	7	Pass1	PepFrag1	None	39460305	NKPLASDVDLHNVATQTPGYVGADLENVLNEAALVAAR	NKPLASDVDLHNVATQTPGYVGADLENVLNEAALVAAR	378	38	4.20	5010	3	3	0	1	8551292	54260	Missing	912	2.3	b7*b9*b10b29b32y9y9*y10*y13*	475628	3680	288176246240716	104088123120358	0.0122	Yellow	34881	39460545	39460490	429821	1220	1220.00	4.00	4	9872691
NCDO2118_RS00110	ATP-dependent zinc metalloprotease FtsH 26105:28192 forward MW:75561	Regular	3118589	1.77	755608538	48	18	58	20.86	100307	42918	23269	0	8	Pass1	PepFrag1	None	8285189	AIAEALLK	AIAEALLK	611	8	7.00	5012	1	1	0	0	3690207	50610		67	1.1	b6	240462	817	105659286072213	171318572144426	0.0077	Red	3637	8285195	8285212	212187	773	773.00	1.00	1	8285195
NCDO2118_RS00110	ATP-dependent zinc metalloprotease FtsH 26105:28192 forward MW:75561	Regular	3118589	1.77	755608538	48	18	58	20.86	100307	42918	23269	0	9	Pass2	PepFrag2	None	14058049	IPAGVLLEGPPGTGK	IPAGVLLEGPPGTGK	224	15	7.00	5008	3	3	0	0	5874079	52629	Missing	858	2.1	b6y10y11y15	242622	1343	147166956772518	107166956772518	0.0249	Red	7779	14058060	14058077	251300	2499	2499.00	2.00	2	7034067
NCDO2118_RS00110	ATP-dependent zinc metalloprotease FtsH 26105:28192 forward MW:75561	Regular	3118589	1.77	755608538	48	18	58	20.86	100307	42918	23269	0	10	Pass2	MissedCleavage	None	26954050	LGEEIVFGVATPGASNDIEKATHIAR	LGEEIVFGVATPGASNDIEKATHIAR	515	26	4.63	5015	1	1	0	0	2951387	49640	Missing	598	2.9	b7y24	311584	2517	223708135347424	718540676737121	0.0318	Red	14281	26953981	26953993	296263	3189	3189.00	4.00	4	6746050
NCDO2118_RS00110	ATP-dependent zinc metalloprotease FtsH 26105:28192 forward MW:75561	Regular	3118589	1.77	755608538	48	18	58	20.86	100307	42918	23269	0	11	Pass2	MissedCleavage	None	16489156	AIAEALLKYETLDAK	AIAEALLKYETLDAK	611	15	4.44	5016	2	2	0	0	6215073	52874		180	2.0	b10b12y6y12	306015	1577	163800075051383	123800075051383	0.0200	Red	13502	16489074	16489079	291849	2006	2006.00	2.00	2	8249574
NCDO2118_RS00110	ATP-dependent zinc metalloprotease FtsH 26105:28192 forward MW:75561	Regular	3118589	1.77	755608538	48	18	58	20.86	100307	42918	23269	0	12	Pass2	MissedCleavage	None	18269872	SDVLDPALLRPGRFDR	SDVLDPALLRPGRFDR	341	16	7.03	5014	1	1	0	0	1602167	46987	Identified	163	1.6	b4b4y11y12	260319	1697	172007557555126	132007557555126	0.0113	Red	13974	18270115	18270109	294661	1132	1132.00	2.00	2	9140094
NCDO2118_RS00110	ATP-dependent zinc metalloprotease FtsH 26105:28192 forward MW:75561	Regular	3118589	1.77	755608538	48	18	58	20.86	100307	42918	23269	0	13	Pass2	MissedCleavage	None	20010764	TAPSIIFIDEIDAVGRQR	TAPSIIFIDEIDAVGRQR	283	18	4.31	5013	2	2	0	0	7614636	53756	Missing	606	1.5	b6y7y12	332873	1875	183834555316206	82556370210804	0.0078	Yellow	21703	20010694	20010703	335821	778	778.00	3.00	3	6676946
NCDO2118_RS00110	ATP-dependent zinc metalloprotease FtsH 26105:28192 forward MW:75561	Regular	3118589	1.77	755608538	48	18	58	20.86	100307	42918	23269	0	14	Pass2	VarMod	Phosphoryl STY(5)	19249779	KTAPSIIFIDEIDAVGR	KTAPSIIFIDEIDAVGR	282	17	4.31	5021	3	3	0	1	17409520	57347	Identified	915	3.8	b12b17y5y7y14	524677	1748	175436755267207	76957836844805	0.1089	Yellow	25711	19249771	19249783	356841	10926	10926.00	2.77	3	6423305
NCDO2118_RS00110	ATP-dependent zinc metalloprotease FtsH 26105:28192 forward MW:75561	Regular	3118589	1.77	755608538	48	18	58	20.86	100307	42918	23269	0	15	Pass2	VarMod	Oxidation M(7)	16138203	ISYSQLMTKLDGNK	ISYSQLMTKLDGNK	43	14	9.63	5019	0	0	0	0	1391856	46376		243	2.3	b10y7*	203900	1495	158071568477359	118071568477359	0.0340	Red	15583	16138324	16138330	303320	3413	3413.00	2.00	2	8074198
NCDO2118_RS00110	ATP-dependent zinc metalloprotease FtsH 26105:28192 forward MW:75561	Regular	3118589	1.77	755608538	48	18	58	20.86	100307	42918	23269	0	16	Pass2	VarMod	Oxidation M(3)	8824753	QIMSLFK	QIMSLFK	626	7	10.10	5018	2	2	1	0	4199902	51172		76	1.2	y5y6	243468	829	106691377218832	173382754437665	0.0104	Red	28533	8824740	8824758	372338	1048	1048.00	1.00	1	8824740
NCDO2118_RS00110	ATP-dependent zinc metalloprotease FtsH 26105:28192 forward MW:75561	Regular	3118589	1.77	755608538	48	18	58	20.86	100307	42918	23269	0	17	Pass2	VarMod	Phosphoryl STY(6)	40259968	NKPLASDVDLHNVATQTPGYVGADLENVLNEAALVAAR	NKPLASDVDLHNVATQTPGYVGADLENVLNEAALVAAR	378	38	4.20	5017	1	1	0	0	1173892	45636	Missing	1056	2.1	b19*y18*y30y38*	475628	3680	288176246240716	152117497493811	0.0100	Red	32992	40260200	40259984	408889	1002	1002.00	3.00	3	13426782
NCDO2118_RS00110	ATP-dependent zinc metalloprotease FtsH 26105:28192 forward MW:75561	Regular	3118589	1.77	755608538	48	18	58	20.86	100307	42918	23269	0	18	Pass2	VarMod	Phosphoryl STY(20)	22981642	YHDLGARIPAGVLLEGPPGTGK	YHDLGARIPAGVLLEGPPGTGK	217	22	7.74	5020	2	2	0	0	5547792	52381	Identified	183	1.7	b13y14y18	266389	2080	197001042400332	157001042400332	0.0096	Red	33284	22981697	22981650	412549	966	966.00	2.28	2	11495885
NCDO2118_RS00110	ATP-dependent zinc metalloprotease FtsH 26105:28192 forward MW:75561	Regular	3118589	1.77	755608538	48	18	58	20.86	100307	42918	23269	0	19	Pass2	InSource	Oxidation M(1)	6413327	MSLFK	QIMSLFK	628	5	10.10	5018	0	0	0	0	124626	0.0000		0	0.0		243468	591	851434586985685	130286917397137	0.0923	Red	28537	6413356	6413374	372369	9260	9260.00	1.00	1	6413356
NCDO2118_RS00110	ATP-dependent zinc metalloprotease FtsH 26105:28192 forward MW:75561	Regular	3118589	1.77	755608538	48	18	58	20.86	100307	42918	23269	0	20	Pass2	InSource	Oxidation M(2)	7544168	IMSLFK	QIMSLFK	627	6	10.10	5018	1	1	0	0	5959080	0.0000		32	0.0	y5	243468	715	96671174575233	153342349150466	0.0731	Red	28569	7544150	7544168	372457	7332	7332.00	1.00	1	7544150
NCDO2118_RS00110	ATP-dependent zinc metalloprotease FtsH 26105:28192 forward MW:75561	Regular	3118589	1.77	755608538	48	18	58	20.86	100307	42918	23269	0	21	Pass2	NeutralLoss_H2O	Oxidation M(3)	8644648	QIMSLFK	QIMSLFK	626	7	10.10	5018	0	0	0	0	368811	0.0000		0	0.0		243468	829	106691377218832	173382754437665	0.0131	Red	28559	8644615	8644633	372427	1314	1314.00	1.00	1	8644615
NCDO2118_RS00110	ATP-dependent zinc metalloprotease FtsH 26105:28192 forward MW:75561	Regular	939341	1.94	755608538	7	3	58	11.08	8309	8309	1194	1	1	Pass1	PepFrag1	None	35457226	IGGYMLALPDEEIMQPTNFHLQDQLASLMGGR	IGGYMLALPDEEIMQPTNFHLQDQLASLMGGR	483	32	4.06	1076	3	3	2	0	1942325	42611	Missing	445	3.8	y9y10y10*y11y11*y12y19	450267	3292	267546650671313	937733253356567	0.7003	Red	6720	35457418	35457418	354321	5819	5819.00	3.73	4	8871909
NCDO2118_RS00110	ATP-dependent zinc metalloprotease FtsH 26105:28192 forward MW:75561	Regular	939341	1.94	755608538	7	3	58	11.08	8309	8309	1194	0	2	Pass1	PepFrag1	None	17169167	TAPSIIFIDEIDAVGR	TAPSIIFIDEIDAVGR	283	16	3.70	1074	3	3	1	0	31120940	54659	Identified	717	1.9	b10y9y10y14	369733	1613	166283521182289	126283521182289	0.2018	Red	7473	17169110	17169100	382350	1677	1677.00	2.00	2	8589591
NCDO2118_RS00110	ATP-dependent zinc metalloprotease FtsH 26105:28192 forward MW:75561	Regular	939341	1.94	755608538	7	3	58	11.08	8309	8309	1194	0	3	Pass1	PepFrag1	None	31905685	EQTLNQLLVEMDGFQDDGNSVIVIAATNR	EQTLNQLLVEMDGFQDDGNSVIVIAATNR	312	29	3.43	1075	1	1	0	0	3198366	44778		32	1.8	y12	439589	2952	248792453491589	125861635661059	0.0978	Red	8824	31906007	31905935	446775	813	813.00	3.00	3	10642051
NCDO2118_RS00110	ATP-dependent zinc metalloprotease FtsH 26105:28192 forward MW:75561	Regular	2783664	3.1	755608538	49	17	58	16.12	90413	49188	28680	1	1	Pass1	PepFrag1	None	15948475	NFQAYIIPTDSVVK	NFQAYIIPTDSVVK	99	14	6.78	5831	5	5	1	1	6071012	52279	Identified	8307	4.9	b3b4b4*b13b14y7y10	317854	1493	157930559037942	117930559037942	0.2879	Red	39950	15948466	15948473	417713	26033	26033.00	2.08	2	7979269
NCDO2118_RS00110	ATP-dependent zinc metalloprotease FtsH 26105:28192 forward MW:75561	Regular	2783664	3.1	755608538	49	17	58	16.12	90413	49188	28680	0	2	Pass1	PepFrag1	None	8285189	AIAEALLK	AIAEALLK	611	8	7.00	5825	7	7	4	1	113221700	64985		3562	3.1	b4b5b6y4y5y6y8	238324	817	105659286072213	171318572144426	0.1449	Green	3532	8285204	8285223	215064	13100	13100.00	1.30	1	8285204
NCDO2118_RS00110	ATP-dependent zinc metalloprotease FtsH 26105:28192 forward MW:75561	Regular	2783664	3.1	755608538	49	17	58	16.12	90413	49188	28680	0	3	Pass1	PepFrag1	None	14087907	SDVLDPALLRPGR	SDVLDPALLRPGR	341	13	6.95	5826	7	7	1	0	14091750	55936	Identified	6735	3.4	b2b6b7b7b10b11y8y10y13	224318	1323	145702229398225	571348195988164	0.1112	Yellow	8099	14087814	14087859	249670	10055	10055.00	2.55	3	4702653
NCDO2118_RS00110	ATP-dependent zinc metalloprotease FtsH 26105:28192 forward MW:75561	Regular	2783664	3.1	755608538	49	17	58	16.12	90413	49188	28680	0	4	Pass1	PepFrag1	None	8664804	QIMSLFK	QIMSLFK	626	7	10.10	5827	3	3	0	0	13249140	55668		799	2.4	b4y2y4y6	243485	829	106691377218832	666913772188325	0.0862	Yellow	11227	8664752	8664775	269438	7792	7792.00	2.00	2	4337412
NCDO2118_RS00110	ATP-dependent zinc metalloprotease FtsH 26105:28192 forward MW:75561	Regular	2783664	3.1	755608538	49	17	58	16.12	90413	49188	28680	0	5	Pass1	PepFrag1	None	5453657	TLLAK	TLLAK	239	5	10.10	5832	1	1	0	0	4331056	50812		53	1.4	y3	118829	543	804685521509633	120937104301927	0.0276	Red	5414	5453611	5453629	231122	2497	2497.00	1.00	1	5453611
NCDO2118_RS00110	ATP-dependent zinc metalloprotease FtsH 26105:28192 forward MW:75561	Regular	2783664	3.1	755608538	49	17	58	16.12	90413	49188	28680	0	6	Pass1	PepFrag1	None	39460305	NKPLASDVDLHNVATQTPGYVGADLENVLNEAALVAAR	NKPLASDVDLHNVATQTPGYVGADLENVLNEAALVAAR	378	38	4.20	5829	2	2	0	0	6072198	52280	Missing	445	2.6	b6b8b10*b23*y13*	464365	3680	288176246240716	104088123120358	0.0179	Red	40455	39460285	39460238	422460	1615	1615.00	4.00	4	9872626
NCDO2118_RS00110	ATP-dependent zinc metalloprotease FtsH 26105:28192 forward MW:75561	Regular	2783664	3.1	755608538	49	17	58	16.12	90413	49188	28680	0	7	Pass1	PepFrag1	None	30623861	TFEESLKDANANVDDFSNINIYNGDEK	TFEESLKDANANVDDFSNINIYNGDEK	650	27	3.63	5828	3	3	0	0	3849391	50300		181	2.2	b5b12b19	331970	2750	237309302808562	118206201872375	0.0174	Red	21895	30623723	30623654	317620	1569	1569.00	3.00	3	10214623
NCDO2118_RS00110	ATP-dependent zinc metalloprotease FtsH 26105:28192 forward MW:75561	Regular	2783664	3.1	755608538	49	17	58	16.12	90413	49188	28680	0	8	Pass2	PepFrag2	None	31905685	EQTLNQLLVEMDGFQDDGNSVIVIAATNR	EQTLNQLLVEMDGFQDDGNSVIVIAATNR	312	29	3.43	5840	1	1	0	0	887014	43925		71	4.3	b12y14*	430746	2952	248792453491589	208792453491589	0.0961	Red	31210	31906357	31906211	359231	8689	8689.00	2.00	2	15958215
NCDO2118_RS00110	ATP-dependent zinc metalloprotease FtsH 26105:28192 forward MW:75561	Regular	2783664	3.1	755608538	49	17	58	16.12	90413	49188	28680	0	9	Pass2	PepFrag2	None	16638286	GTNNFPLLGNSSSEVK	GTNNFPLLGNSSSEVK	83	16	7.00	5830	4	4	1	0	3221895	49527	Missing	3010	2.6	b8y4y5y6y12y16	262642	1518	159688686462042	119688686462042	0.0453	Red	13123	16638491	16638495	278933	4095	4095.00	2.00	2	8324282
NCDO2118_RS00110	ATP-dependent zinc metalloprotease FtsH 26105:28192 forward MW:75561	Regular	2783664	3.1	755608538	49	17	58	16.12	90413	49188	28680	0	10	Pass2	PepFrag2	None	20460390	LGEEIVFGVATPGASNDIEK	LGEEIVFGVATPGASNDIEK	515	20	3.69	5833	4	4	1	1	2144321	47759	Identified	1644	2.6	b11y9y9*y10y13	336004	1900	185465030305411	836433535369406	0.0366	Red	11094	20460146	20460168	268915	3307	3307.00	3.00	3	6826764
NCDO2118_RS00110	ATP-dependent zinc metalloprotease FtsH 26105:28192 forward MW:75561	Regular	2783664	3.1	755608538	49	17	58	16.12	90413	49188	28680	0	11	Pass2	PepFrag2	None	8364149	DLFENAK	DLFENAK	275	7	4.07	5841	1	1	0	0	1199119	45235		738	1.5	y4*y7	161859	757	10042077156173	160841543123461	0.0208	Red	7201	8363927	8363946	244164	1883	1883.00	1.45	1	8363927
NCDO2118_RS00110	ATP-dependent zinc metalloprotease FtsH 26105:28192 forward MW:75561	Regular	2783664	3.1	755608538	49	17	58	16.12	90413	49188	28680	0	12	Pass2	PepFrag2	None	41740106	GAGLGGGNDEREQTLNQLLVEMDGFQDDGNSVIVIAATNR	GAGLGGGNDEREQTLNQLLVEMDGFQDDGNSVIVIAATNR	301	40	3.63	5839	0	0	0	0	4576400	51051		516	2.4	b15	382110	3827	295800299243192	157200199495461	0.0146	Red	36420	41738690	41738444	385352	1316	1316.00	3.00	3	13919612
NCDO2118_RS00110	ATP-dependent zinc metalloprotease FtsH 26105:28192 forward MW:75561	Regular	2783664	3.1	755608538	49	17	58	16.12	90413	49188	28680	0	13	Pass2	MissedCleavage	None	16489156	AIAEALLKYETLDAK	AIAEALLKYETLDAK	611	15	4.44	5835	1	1	0	0	3693152	50120		41	2.5	y11	297827	1577	163800075051383	123800075051383	0.0413	Red	15986	16489144	16489148	292429	3732	3732.00	2.00	2	8249608
NCDO2118_RS00110	ATP-dependent zinc metalloprotease FtsH 26105:28192 forward MW:75561	Regular	2783664	3.1	755608538	49	17	58	16.12	90413	49188	28680	0	14	Pass2	MissedCleavage	None	23920973	DYGQTKTYSEATAVMIDDEVR	DYGQTKTYSEATAVMIDDEVR	568	21	3.86	5834	2	2	0	0	4759191	51222		360	1.6	b12b18y9y11y19	271169	2162	202145197177627	947634647850844	0.0087	Red	17045	23920970	23920969	297191	787	787.00	3.00	3	7980372
NCDO2118_RS00110	ATP-dependent zinc metalloprotease FtsH 26105:28192 forward MW:75561	Regular	2783664	3.1	755608538	49	17	58	16.12	90413	49188	28680	0	15	Pass2	VarMod	Phosphoryl STY(*)	28994462	EREIVAYHEAGHAIVGLVLENGSTVR	EREIVAYHEAGHAIVGLVLENGSTVR	448	26	5.30	5836	2	2	0	0	3102503	49363		705	2.2	b3b4y10y12	305466	2632	230471320859712	752356604298559	0.0173	Red	33331	28994409	28994413	369093	1564	1564.00	4.00	4	7256157
NCDO2118_RS00110	ATP-dependent zinc metalloprotease FtsH 26105:28192 forward MW:75561	Regular	2783664	3.1	755608538	49	17	58	16.12	90413	49188	28680	0	16	Pass2	VarMod	Phosphoryl STY(5)	27423974	EIVAYHEAGHAIVGLVLENGSTVRK	EIVAYHEAGHAIVGLVLENGSTVRK	450	25	6.04	5837	3	3	0	1	5630364	51952		746	2.0	b18y7y9*y23y25*	301971	2510	22329317476201	108862116508007	0.0139	Red	37117	27424024	27423991	389292	1259	1259.00	2.66	3	9148056
NCDO2118_RS00110	ATP-dependent zinc metalloprotease FtsH 26105:28192 forward MW:75561	Regular	2783664	3.1	755608538	49	17	58	16.12	90413	49188	28680	0	17	Pass2	VarMod	Oxidation M(14)	35617175	IGGYMLALPDEEIMQPTNFHLQDQLASLMGGR	IGGYMLALPDEEIMQPTNFHLQDQLASLMGGR	483	32	4.06	5838	3	3	0	0	2041085	47545	Missing	767	2.1	b9b10y5y11y19*	459265	3292	267546650671313	937733253356567	0.0124	Red	33184	35617055	35617030	368293	1120	1120.00	4.00	4	8911818
NCDO2118_RS00110	ATP-dependent zinc metalloprotease FtsH 26105:28192 forward MW:75561	Regular	1084683	3.76	755608538	22	5	58	4.17	19352	9037	5893	1	1	Pass1	PepFrag1	None	8975404	VLVGAPDVK	VLVGAPDVK	358	9	6.78	2738	7	7	5	1	68086220	58684	Identified	2680	2.6	b2y3y4y5y5y6y7y8y9	185699	870	110180769869336	701807698693355	0.3547	Green	4186	8975349	8975379	185010	6864	6864.00	1.85	2	4492711
NCDO2118_RS00110	ATP-dependent zinc metalloprotease FtsH 26105:28192 forward MW:75561	Regular	1084683	3.76	755608538	22	5	58	4.17	19352	9037	5893	0	2	Pass1	PepFrag1	None	8534302	TFEESLK	TFEESLK	650	7	4.26	2737	1	1	0	0	4767026	47136		129	1.3	y6	165942	778	102269476338066	622694763380663	0.0702	Red	3088	8534341	8534372	170813	1359	1359.00	1.61	2	4272207
NCDO2118_RS00110	ATP-dependent zinc metalloprotease FtsH 26105:28192 forward MW:75561	Regular	1084683	3.76	755608538	22	5	58	4.17	19352	9037	5893	0	3	Pass1	PepFrag1	None	11224997	GGGGGGNPMSFGK	GGGGGGNPMSFGK	164	13	10.10	2736	1	1	0	0	5044164	47381	Identified	202	1.3	y4y5y6	155096	989	120011766568736	800117665687363	0.0421	Red	2919	11224964	11224989	168286	814	814.00	2.00	2	5617519
NCDO2118_RS00110	ATP-dependent zinc metalloprotease FtsH 26105:28192 forward MW:75561	Regular	1084683	3.76	755608538	22	5	58	4.17	19352	9037	5893	0	4	Pass2	PepFrag2	None	22279738	DANANVDDFSNINIYNGDEK	DANANVDDFSNINIYNGDEK	657	20	3.37	2739	2	2	0	0	2106775	43589		201	1.8	b12y7*y9y11	276865	1972	190121358094478	150121358094478	0.0563	Red	12106	22280105	22280027	292644	1089	1089.00	2.40	2	11145089
NCDO2118_RS00110	ATP-dependent zinc metalloprotease FtsH 26105:28192 forward MW:75561	Regular	1084683	3.76	755608538	22	5	58	4.17	19352	9037	5893	0	5	Pass2	VarMod	Phosphoryl STY(1)	13845991	TDSKPEENKEK	TDSKPEENKEK	677	11	4.65	2740	1	1	0	0	827539	39531	Missing	318	1.7	b8-H3PO4y4y6*y10*	48588	1175	134622673773012	946226737730121	0.0954	Red	12577	13845985	13845997	304472	1846	1846.00	2.00	2	6928029
NCDO2118_RS00110	ATP-dependent zinc metalloprotease FtsH 26105:28192 forward MW:75561	Regular	1084683	3.76	755608538	22	5	58	4.17	19352	9037	5893	0	6	Pass2	InSource	None	6853879	VGAPDVK	VLVGAPDVK	360	7	6.78	2738	7	7	5	1	208743600	0.0000	Identified	1906	0.0	b5y2y3y4y5y5y6y7	185699	641	898803980730476	139760796146095	0.2768	Green	4190	6853875	6853887	185027	5356	5356.00	1.00	1	6853875
NCDO2118_RS00110	ATP-dependent zinc metalloprotease FtsH 26105:28192 forward MW:75561	Regular	1084683	3.76	755608538	22	5	58	4.17	19352	9037	5893	0	7	Pass2	InSource	None	5863195	GAPDVK	VLVGAPDVK	361	6	6.78	2738	3	3	0	0	61817710	0.0000	Identified	457	0.0	y2y4y6	185699	536	797754924937232	119550984987446	0.1046	Green	4192	5863185	5863197	185066	2024	2024.00	1.00	1	5863185
[truncated: 42,617 more rows]
[truncated: 10 more columns]
