# Supplementary material for: Quantitative Proteomic Analysis of the Response of Probiotic Putative Lactococcus lactis NCDO 2118 Strain to Different Oxygen Availability Under Temperature Variation
Source: Front Microbiol. 2019 Apr 11;10:759. doi: 10.3389/fmicb.2019.00759 (PMC6470185; doi:10.3389/fmicb.2019.00759)
Supplement: FILE S6 (TABLE 5) — Total list of peptide and proteins identified in NAE conditions. [file Table_5.xlsx]

## Sheet: Plan1
Table 5: Total list of peptide and proteins identified in NAE conditions.
protein.Entry	protein.Description	protein.dataBaseType	protein.score	protein.falsePositiveRate	protein.avgMass	protein.MatchedProducts	protein.matchedPeptides	protein.digestPeps	protein.seqCover(%)	protein.MatchedPeptideIntenSum	protein.top3MatchedPeptideIntenSum	protein.MatchedProductIntenSum	protein.SumForTotalProteins	peptide.Rank	peptide.Pass	peptide.matchType	peptide.modification	peptide.mhp	peptide.seq	peptide.OriginatingSeq	peptide.seqStart	peptide.seqLength	peptide.pI	peptide.componentID	peptide.MatchedProducts	peptide.UniqueProducts	peptide.ConsectiveMatchedProducts	peptide.ComplementaryMatchedProducts	peptide.rawScore	peptide.score	peptide.(X)-P Bond	peptide.MatchedProductsSumInten	peptide.MatchedProductsTheoretical	peptide.MatchedProductsString	peptide.ModelRT	peptide.Volume	peptide.CSA	peptide.ModelDrift	peptide.RelIntensity	peptide.AutoCurate	precursor.leID	precursor.mhp	precursor.mhpCal	precursor.retT	precursor.inten	precursor.calcInten	precursor.charge	precursor.z	precursor.mz
NCDO2118_RS07170	branched-chain amino acid ABC transporter permease 1496207:1497301 forward MW:38834	Regular	18694150	0	388336739	24	3	14	10.44	54261	54261	17060	1	1	Pass1	PepFrag1	None	16628333	AVGLNPDASEYAGISAK	AVGLNPDASEYAGISAK	224	17	4.07	477	16	16	9	4	349834600	78156	Identified	10747	5.9	b3b4b5b5*b8b9b12b13b15*b17y3y5y6y10y11y12y13y13*y14y15y15*	224829	1525	160179228163551	120179228163551	0.6723	Green	6573	16628367	16628357	221832	36480	36480.00	2.00	2	8319220
NCDO2118_RS07170	branched-chain amino acid ABC transporter permease 1496207:1497301 forward MW:38834	Regular	18694150	0	388336739	24	3	14	10.44	54261	54261	17060	0	2	Pass1	PepFrag1	None	13666519	SILMDNTTDQTK	SILMDNTTDQTK	162	12	3.88	476	5	5	3	1	70203370	71181		2790	3.3	b3y7y8y9y10y10*	196332	1251	140366834935168	100366834935168	0.1919	Green	3189	13666535	13666548	175861	10412	10412.00	2.00	2	6838304
NCDO2118_RS07170	branched-chain amino acid ABC transporter permease 1496207:1497301 forward MW:38834	Regular	18694150	0	388336739	24	3	14	10.44	54261	54261	17060	0	3	Pass1	PepFrag1	None	9785367	LISANASFR	LISANASFR	174	9	11.05	478	3	3	0	0	1671420	54948		3523	2.6	b5b9*y6y9y9*	190974	907	113282934945046	186565869890092	0.1358	Yellow	3051	9785278	9785286	173358	7369	7369.00	1.47	1	9785278
NCDO2118_RS07170	branched-chain amino acid ABC transporter permease 1496207:1497301 forward MW:38834	Regular	22733970	0	388336739	23	3	14	10.44	46794	46794	16060	1	1	Pass1	PepFrag1	None	16628333	AVGLNPDASEYAGISAK	AVGLNPDASEYAGISAK	224	17	4.07	535	15	15	8	4	433946200	79941	Identified	8128	5.1	b2b3b4b5b5*b13*b14b17y3y5y6y9y10y11y12y13y15	229983	1525	160179228163551	120179228163551	0.5218	Green	7308	16628381	16628371	221508	24419	24419.00	2.00	2	8319227
NCDO2118_RS07170	branched-chain amino acid ABC transporter permease 1496207:1497301 forward MW:38834	Regular	22733970	0	388336739	23	3	14	10.44	46794	46794	16060	0	2	Pass1	PepFrag1	None	13666519	SILMDNTTDQTK	SILMDNTTDQTK	162	12	3.88	534	7	7	2	2	72712980	72183		3770	3.7	b3b5y4y5y7y9y9y10y10	196240	1251	140366834935168	100366834935168	0.3074	Green	3465	13666520	13666533	175798	14384	14384.00	2.00	2	6838297
NCDO2118_RS07170	branched-chain amino acid ABC transporter permease 1496207:1497301 forward MW:38834	Regular	22733970	0	388336739	23	3	14	10.44	46794	46794	16060	0	3	Pass2	PepFrag2	None	9785367	LISANASFR	LISANASFR	174	9	11.05	536	1	1	0	0	2836040	58094		4162	2.7	y8y9y9*	199580	907	113282934945046	186565869890092	0.1708	Green	3292	9785318	9785326	173218	7991	7991.00	1.47	1	9785318
NCDO2118_RS07170	branched-chain amino acid ABC transporter permease 1496207:1497301 forward MW:38834	Regular	29906370	0	388336739	27	3	14	16.48	71732	103725	27197	1	1	Pass1	PepFrag1	None	16628333	AVGLNPDASEYAGISAK	AVGLNPDASEYAGISAK	224	17	4.07	622	18	18	9	3	550450000	82165	Identified	21633	6.7	b3b4b5b5*b6b8*b9*b12b13b13*b15b17y3y5y6y7y9y10y11y12y13y15y15*y17	234287	1525	160179228163551	120179228163551	0.7084	Green	10452	16628353	16628348	220863	50813	50813.00	2.00	2	8319213
NCDO2118_RS07170	branched-chain amino acid ABC transporter permease 1496207:1497301 forward MW:38834	Regular	29906370	0	388336739	27	3	14	16.48	71732	103725	27197	0	2	Pass1	PepFrag1	None	13666519	SILMDNTTDQTK	SILMDNTTDQTK	162	12	3.88	621	8	8	4	1	127355600	75808		5218	4.1	b3b6y3y4y7y8y8*y9y9*y10y10	189958	1251	140366834935168	100366834935168	0.2556	Green	4748	13666499	13666512	174902	18337	18337.00	2.00	2	6838286
NCDO2118_RS07170	branched-chain amino acid ABC transporter permease 1496207:1497301 forward MW:38834	Regular	29906370	0	388336739	27	3	14	16.48	71732	103725	27197	0	3	Pass2	VarMod	Oxidation M(*)	33846908	VGLFNIGMSGQALAGWISSMWFALSFPDIPR	VGLFNIGMSGQALAGWISSMWFALSFPDIPR	73	31	7.00	623	1	1	0	0	1809552	57333	Identified	346	2.8	y5y6	511906	3142	259356470875057	464521569583522	0.0360	Green	3026	33846752	33846752	159112	2582	2582.00	6.00	6	5649519
NCDO2118_RS07170	branched-chain amino acid ABC transporter permease 1496207:1497301 forward MW:38834	Regular	10692110	0	388336739	16	2	14	7.97	123050	62553	17075	1	1	Pass1	PepFrag1	None	13666519	SILMDNTTDQTK	SILMDNTTDQTK	162	12	3.88	990	12	12	8	3	323470200	75389		9403	4.6	b2b3b10b11y2y4y5y6y7y8y8*y9y9*y10y10*y11	189167	1251	140366834935168	100366834935168	0.2082	Green	5148	13666522	13666534	175693	25617	25617.00	2.00	2	6838297
NCDO2118_RS07170	branched-chain amino acid ABC transporter permease 1496207:1497301 forward MW:38834	Regular	10692110	0	388336739	16	2	14	7.97	123050	62553	17075	0	2	Pass1	PepFrag1	None	16628333	AVGLNPDASEYAGISAK	AVGLNPDASEYAGISAK	224	17	4.07	991	2	2	0	0	605035	48108	Missing	3606	4.4	b11b11y17	231799	1525	160179228163551	667861521090339	0.1307	Red	7628	16628188	16628192	198704	16085	16085.00	3.00	3	5549444
NCDO2118_RS07170	branched-chain amino acid ABC transporter permease 1496207:1497301 forward MW:38834	Regular	10692110	0	388336739	16	2	14	7.97	123050	62553	17075	0	3	Pass2	InSource	None	11175160	AVGLNPDASEY	AVGLNPDASEYAGISAK	224	11	3.01	991	2	2	0	0	2741015	0.0000	Identified	4066	0.0	b5b11	231799	1011	12178498246261	817849824626101	0.6611	Red	7642	11175198	11175215	198922	81348	81348.00	1.92	2	5592635
NCDO2118_RS07170	branched-chain amino acid ABC transporter permease 1496207:1497301 forward MW:38834	Regular	17054680	0	388336739	26	2	14	7.97	43184	64776	16916	1	1	Pass1	PepFrag1	None	16628333	AVGLNPDASEYAGISAK	AVGLNPDASEYAGISAK	224	17	4.07	802	18	18	9	4	302062700	77119	Identified	14714	5.9	b4b5b5*b7b8b10*b11b12b13b15b17y3y5y7y10y10y11y12y13y13y14y15y17	231384	1525	160179228163551	120179228163551	0.8401	Green	8540	16628391	16628388	220666	36280	36280.00	2.00	2	8319232
NCDO2118_RS07170	branched-chain amino acid ABC transporter permease 1496207:1497301 forward MW:38834	Regular	17054680	0	388336739	26	2	14	7.97	43184	64776	16916	0	2	Pass1	PepFrag1	None	13666519	SILMDNTTDQTK	SILMDNTTDQTK	162	12	3.88	801	8	8	5	1	89403230	71832		2202	2.9	b3b12y5y6y7y8y9y10y10*	192207	1251	140366834935168	100366834935168	0.1599	Green	3835	13666517	13666530	175416	6904	6904.00	2.00	2	6838295
NCDO2118_RS07170	branched-chain amino acid ABC transporter permease 1496207:1497301 forward MW:38834	Regular	11512690	0	388336739	21	4	14	8.24	27379	36055.5	8478	1	1	Pass1	PepFrag1	None	16628333	AVGLNPDASEYAGISAK	AVGLNPDASEYAGISAK	224	17	4.07	892	15	15	7	5	230507800	74239	Identified	6171	4.6	b2b3b4b5b5*b8*b11b12b14b15y3y6y7y10y12y13y15y15*	233500	1525	160179228163551	120179228163551	0.6714	Green	8089	16628373	16628368	220742	18382	18382.00	2.00	2	8319223
NCDO2118_RS07170	branched-chain amino acid ABC transporter permease 1496207:1497301 forward MW:38834	Regular	11512690	0	388336739	21	4	14	8.24	27379	36055.5	8478	0	2	Pass1	PepFrag1	None	13666519	SILMDNTTDQTK	SILMDNTTDQTK	162	12	3.88	891	4	4	2	0	20950470	63824		1785	2.7	y4y8y8*y9y10y10*	195376	1251	140366834935168	100366834935168	0.2065	Green	3778	13666530	13666544	175394	5655	5655.00	2.00	2	6838302
NCDO2118_RS07170	branched-chain amino acid ABC transporter permease 1496207:1497301 forward MW:38834	Regular	11512690	0	388336739	21	4	14	8.24	27379	36055.5	8478	0	3	Pass2	PepFrag2	None	18189345	AVGLNPDASEYAGISAKR	AVGLNPDASEYAGISAKR	224	18	6.95	893	2	2	0	0	1143334	51194	Missing	310	2.1	b3y9y14	213075	1673	170381954100989	130381954100989	0.0691	Yellow	11154	18189131	18189113	257046	1893	1893.00	2.00	2	9099602
NCDO2118_RS07170	branched-chain amino acid ABC transporter permease 1496207:1497301 forward MW:38834	Regular	11512690	0	388336739	21	4	14	8.24	27379	36055.5	8478	0	4	Pass2	VarMod	Phosphoryl STY(*)	17427996	AVGLNPDASEYAGISAK	AVGLNPDASEYAGISAK	224	17	4.07	894	0	0	0	0	1282084	51691	Missing	212	1.8	b9*b14y7y15*	233500	1525	160179228163551	120179228163551	0.0529	Yellow	4650	17427961	17427949	185633	1449	1449.00	2.29	2	8719017
NCDO2118_RS07170	branched-chain amino acid ABC transporter permease 1496207:1497301 forward MW:38834	Regular	7706057	0.44	388336739	17	2	14	3.30	78639	227124	37212	1	1	Pass1	PepFrag1	None	13666519	SILMDNTTDQTK	SILMDNTTDQTK	162	12	3.88	1708	13	13	7	4	233750400	72556		36451	6.8	b2b3b5b10y2y3y3y4y6y7y8y8*y9y9y10y10*y11y12	190123	1251	140366834935168	100366834935168	0.9627	Green	6110	13666570	13666582	175364	75708	75708.00	1.99	2	6838321
NCDO2118_RS07170	branched-chain amino acid ABC transporter permease 1496207:1497301 forward MW:38834	Regular	7706057	0.44	388336739	17	2	14	3.30	78639	227124	37212	0	2	Pass2	VarMod	Oxidation M(4)	13826468	SILMDNTTDQTK	SILMDNTTDQTK	162	12	3.88	1709	4	4	0	1	1099073	49279		761	1.9	b4b7b11b11*y5	190123	1251	140366834935168	100366834935168	0.0277	Red	6083	13826567	13826579	175100	2177	2177.00	2.00	2	6918320
NCDO2118_RS07170	branched-chain amino acid ABC transporter permease 1496207:1497301 forward MW:38834	Regular	7706057	0.44	388336739	17	2	14	3.30	78639	227124	37212	0	3	Pass2	InSource	None	11665358	LMDNTTDQTK	SILMDNTTDQTK	164	10	3.88	1708	0	0	0	0	1222037	0.0000		0	0.0		190123	1054	125214139930828	210428279861655	0.0096	Green	6112	11665387	11665398	175406	754	754.00	1.00	1	11665387
NCDO2118_RS07170	branched-chain amino acid ABC transporter permease 1496207:1497301 forward MW:38834	Regular	2203561	0.64	388336739	6	4	14	7.97	6041	6700.5	2762	1	1	Pass1	PepFrag1	None	16628333	AVGLNPDASEYAGISAK	AVGLNPDASEYAGISAK	224	17	4.07	1769	3	3	1	1	45327600	59995	Identified	692	2.2	b5y12y13	232775	1525	160179228163551	120179228163551	0.4006	Green	4653	16628330	16628319	221386	2420	2420.00	2.00	2	8319201
NCDO2118_RS07170	branched-chain amino acid ABC transporter permease 1496207:1497301 forward MW:38834	Regular	2203561	0.64	388336739	6	4	14	7.97	6041	6700.5	2762	0	2	Pass1	PepFrag1	None	13666519	SILMDNTTDQTK	SILMDNTTDQTK	162	12	3.88	1770	3	3	0	0	2627249	47626		1263	1.8	b12y6y12	192332	1251	140366834935168	100366834935168	0.3389	Red	3047	13666430	13666440	194987	2047	2047.00	2.00	2	6838252
NCDO2118_RS07170	branched-chain amino acid ABC transporter permease 1496207:1497301 forward MW:38834	Regular	2203561	0.64	388336739	6	4	14	7.97	6041	6700.5	2762	0	3	Pass2	MissedCleavage	None	25523243	TTLGFEIKAVGLNPDASEYAGISAK	TTLGFEIKAVGLNPDASEYAGISAK	216	25	4.44	1771	0	0	0	0	3290939	48604	Identified	649	1.7	b11y12y13	322101	2386	215877109167567	103918072778378	0.1265	Red	10908	25522943	25522911	316103	764	764.00	3.00	3	8514363
NCDO2118_RS07170	branched-chain amino acid ABC transporter permease 1496207:1497301 forward MW:38834	Regular	2203561	0.64	388336739	6	4	14	7.97	6041	6700.5	2762	0	4	Pass2	VarMod	Phosphoryl STY(9)	34486622	VGLFNIGMSGQALAGWISSMWFALSFPDIPR	VGLFNIGMSGQALAGWISSMWFALSFPDIPR	73	31	7.00	1772	0	0	0	0	1471403	45109	Missing	158	1.8	b10*b11y12	493653	3142	259356470875057	132904313916704	0.1341	Red	9516	34486797	34486652	291566	810	810.00	3.00	3	11502314
NCDO2118_RS07170	branched-chain amino acid ABC transporter permease 1496207:1497301 forward MW:38834	Regular	2505150	0.8	388336739	8	3	14	7.97	40374	92649	8982	1	1	Pass1	PepFrag1	None	13666519	SILMDNTTDQTK	SILMDNTTDQTK	162	12	3.88	1442	8	8	4	1	66766760	62234		8755	4.9	b3b11y3y4y7y7*y8y8*y8y9y10y10	195657	1251	140366834935168	100366834935168	0.7649	Green	3973	13666602	13666611	176640	30883	30883.00	2.00	2	6838337
NCDO2118_RS07170	branched-chain amino acid ABC transporter permease 1496207:1497301 forward MW:38834	Regular	2505150	0.8	388336739	8	3	14	7.97	40374	92649	8982	0	2	Pass2	PepFrag2	None	16628333	AVGLNPDASEYAGISAK	AVGLNPDASEYAGISAK	224	17	4.07	1443	0	0	0	0	6074996	51824	Identified	146	3.5	y12	211915	1525	160179228163551	667861521090339	0.2150	Yellow	6163	16628091	16628117	206458	8680	8680.00	3.00	3	5549412
NCDO2118_RS07170	branched-chain amino acid ABC transporter permease 1496207:1497301 forward MW:38834	Regular	2505150	0.8	388336739	8	3	14	7.97	40374	92649	8982	0	3	Pass2	PepFrag2	None	14078610	VVTASIIFFIAVK	VVTASIIFFIAVK	325	13	10.10	1444	0	0	0	0	569132	41540		81	1.3	b11	292751	1392	150725173010307	110725173010307	0.0201	Red	8068	14079057	14079064	231612	811	811.00	2.00	2	7044565
NCDO2118_RS07170	branched-chain amino acid ABC transporter permease 1496207:1497301 forward MW:38834	Regular	2242536	2.03	388336739	6	3	14	3.30	20757	55533	5196	1	1	Pass1	PepFrag1	None	13666519	SILMDNTTDQTK	SILMDNTTDQTK	162	12	3.88	1564	5	5	2	2	67488140	61800		4900	4.1	b2b3y4y7y9y9y10y10	194805	1251	140366834935168	100366834935168	0.8918	Green	4696	13666486	13666495	176356	18511	18511.00	2.00	2	6838279
NCDO2118_RS07170	branched-chain amino acid ABC transporter permease 1496207:1497301 forward MW:38834	Regular	2242536	2.03	388336739	6	3	14	3.30	20757	55533	5196	0	2	Pass2	PepFrag2	None	16628333	AVGLNPDASEYAGISAK	AVGLNPDASEYAGISAK	224	17	4.07	1566	1	1	0	0	377970	39282	Missing	99	1.8	b9b13	231167	1525	160179228163551	120179228163551	0.0705	Red	14411	16628082	16628081	312243	1464	1464.00	2.00	2	8319077
NCDO2118_RS07170	branched-chain amino acid ABC transporter permease 1496207:1497301 forward MW:38834	Regular	2242536	2.03	388336739	6	3	14	3.30	20757	55533	5196	0	3	Pass2	VarMod	Oxidation M(4)	13826468	SILMDNTTDQTK	SILMDNTTDQTK	162	12	3.88	1565	0	0	0	0	1210970	44339		197	1.3	b4y5*y6*	194805	1251	140366834935168	100366834935168	0.0377	Red	10441	13826460	13826469	238332	782	782.00	2.00	2	6918266
NCDO2118_RS07175	sugar ABC transporter permease 1497298:1498251 forward MW:33552	Regular	1857513	3.17	335517646	10	1	10	6.31	7218	21654	2798	1	1	Pass1	PepFrag1	None	21380513	SVGENPQAADTLGINVYAYR	SVGENPQAADTLGINVYAYR	181	20	4.07	3735	10	10	4	1	29441580	57379	Missing	2798	3.5	b2b9b10b11*b13y4y6y7y8*y9y10y12y13y20	276564	1947	188511103289793	148511103289793	10000	Yellow	14085	21380679	21380631	277746	7218	7218.00	2.32	2	10695376
NCDO2118_RS07180	lactate dehydrogenase 1498372:1499349 reverse MW:35050	Regular	15966270	0	351077616	52	7	20	27.69	220819	169515	65200	1	1	Pass1	PepFrag1	None	6823559	FSGFPK	FSGFPK	134	6	10.10	741	8	8	6	3	62450700	69987	Identified	40291	4.0	b2b2b3b3b4y2y3y4y5y6	144847	616	875279537689346	135055907537869	0.5508	Green	2437	6823552	6823568	183181	121634	121634.00	1.00	1	6823552
NCDO2118_RS07180	lactate dehydrogenase 1498372:1499349 reverse MW:35050	Regular	15966270	0	351077616	52	7	20	27.69	220819	169515	65200	0	2	Pass1	PepFrag1	None	7214243	IVASGFK	IVASGFK	108	7	10.10	740	13	13	11	5	490622700	78940		12980	4.4	b2b3b4b5b5b6b7y1y2y3y4y4y5y5y6y7	155697	687	941305924769588	148261184953918	0.1784	Green	1364	7214233	7214249	150938	39386	39386.00	1.00	1	7214233
NCDO2118_RS07180	lactate dehydrogenase 1498372:1499349 reverse MW:35050	Regular	15966270	0	351077616	52	7	20	27.69	220819	169515	65200	0	3	Pass1	PepFrag1	None	18879083	TQGDAEDLSHALAFTSPK	TQGDAEDLSHALAFTSPK	43	18	4.30	738	7	7	1	1	14235520	63566	Missing	1953	3.6	b2y5y8y10y15y16y17y18	252075	1712	173019668035187	753464453567915	0.0385	Green	7395	18879121	18879138	258801	8495	8495.00	3.00	3	6299756
NCDO2118_RS07180	lactate dehydrogenase 1498372:1499349 reverse MW:35050	Regular	15966270	0	351077616	52	7	20	27.69	220819	169515	65200	0	4	Pass1	PepFrag1	None	11626062	VVGSGTSLDTAR	VVGSGTSLDTAR	142	12	7.00	736	7	7	5	1	53198610	69291		2078	2.7	b2y6y7y8y9y10y10y11	162353	1068	126320490295024	863204902950241	0.0272	Green	1222	11626041	11626060	141130	6006	6006.00	2.00	2	5818057
NCDO2118_RS07180	lactate dehydrogenase 1498372:1499349 reverse MW:35050	Regular	15966270	0	351077616	52	7	20	27.69	220819	169515	65200	0	5	Pass1	PepFrag1	None	30264589	IYSADYSDASDADLVVLTSGAPQKPGETR	IYSADYSDASDADLVVLTSGAPQKPGETR	62	29	3.77	739	3	3	0	1	8681779	61418	Missing	950	3.5	b2y25y27y29*	276245	2756	237654354578874	118436236385916	0.0235	Green	8312	30264755	30264670	273447	5181	5181.00	3.00	3	10094967
NCDO2118_RS07180	lactate dehydrogenase 1498372:1499349 reverse MW:35050	Regular	15966270	0	351077616	52	7	20	27.69	220819	169515	65200	0	6	Pass1	PepFrag1	None	9775302	AIIDEAFAK	AIIDEAFAK	307	9	4.07	737	3	3	2	0	25953210	66174		715	1.8	y5y6y7y8	230141	919	11427993248041	742799324804103	0.0120	Green	5128	9775275	9775299	228599	2649	2649.00	2.00	2	4892674
NCDO2118_RS07180	lactate dehydrogenase 1498372:1499349 reverse MW:35050	Regular	15966270	0	351077616	52	7	20	27.69	220819	169515	65200	0	7	Pass2	MissedCleavage	None	9944840	EEFASAVKN	EEFASAVKN	316	9	4.26	742	1	1	0	0	1333047	53280		247	1.6	y6y9*	172131	896	112365151230056	723651512300563	0.0092	Yellow	3794	9944949	9944972	208183	2029	2029.00	2.00	2	4977511
NCDO2118_RS07180	lactate dehydrogenase 1498372:1499349 reverse MW:35050	Regular	15966270	0	351077616	52	7	20	27.69	220819	169515	65200	0	8	Pass2	InSource	None	5092718	ASGFK	IVASGFK	110	5	10.10	740	8	8	5	2	428851000	0.0000		5049	0.0	b2b2b3b3b5y1y2y3y4y4y5	155697	458	718350865789055	103670173157811	0.1311	Green	1365	5092711	5092727	150943	28951	28951.00	1.00	1	5092711
NCDO2118_RS07180	lactate dehydrogenase 1498372:1499349 reverse MW:35050	Regular	15966270	0	351077616	52	7	20	27.69	220819	169515	65200	0	9	Pass2	InSource	None	4482554	GFPK	FSGFPK	136	4	10.10	741	2	2	0	0	1260283	0.0000	Identified	937	0.0	y2y4	144847	408	665068547459113	930137094918227	0.0294	Green	2443	4482518	4482534	183248	6488	6488.00	1.00	1	4482518
NCDO2118_RS07180	lactate dehydrogenase 1498372:1499349 reverse MW:35050	Regular	32926440	0	351077616	59	10	20	42.77	105048	79163	34501	1	1	Pass1	PepFrag1	None	20921477	GIFLVAANPVDILTYATWK	GIFLVAANPVDILTYATWK	115	19	6.78	1393	22	22	17	8	425501000	81464	Identified	16426	6.6	b3b4b5b6b7b8b8*b9b11b12*b19y3y4y5y6y7y7y8y9y10y11y12y13y14y15y15*y16	471078	1992	19140466729043	15140466729043	0.4206	Green	36827	20921531	20921501	481736	44186	44186.00	2.17	2	10465802
NCDO2118_RS07180	lactate dehydrogenase 1498372:1499349 reverse MW:35050	Regular	32926440	0	351077616	59	10	20	42.77	105048	79163	34501	0	2	Pass1	PepFrag1	Carbamidomethyl C(25)	56747833	AILDDEHAVLPVSVFQDGQYGVSDCYLGQPAVVGAEGVVNPIHIPLNDAEMQK	AILDDEHAVLPVSVFQDGQYGVSDCYLGQPAVVGAEGVVNPIHIPLNDAEMQK	245	53	3.78	1394	1	1	0	0	7489402	63920	Identified	252	8.2	b10	358217	5217	36366948260286	14183474130143	0.2670	Green	30517	56748006	56747704	398010	28049	28049.00	4.00	4	14194556
NCDO2118_RS07180	lactate dehydrogenase 1498372:1499349 reverse MW:35050	Regular	32926440	0	351077616	59	10	20	42.77	105048	79163	34501	0	3	Pass1	PepFrag1	None	18879083	TQGDAEDLSHALAFTSPK	TQGDAEDLSHALAFTSPK	43	18	4.30	1391	4	4	1	1	11882910	65925	Missing	1503	3.3	b2y7y8y9y16y16y17*	260897	1712	173019668035187	753464453567915	0.0660	Green	6804	18879011	18879041	254697	6928	6928.00	2.86	3	6299719
NCDO2118_RS07180	lactate dehydrogenase 1498372:1499349 reverse MW:35050	Regular	32926440	0	351077616	59	10	20	42.77	105048	79163	34501	0	4	Pass1	PepFrag1	None	30264589	IYSADYSDASDADLVVLTSGAPQKPGETR	IYSADYSDASDADLVVLTSGAPQKPGETR	62	29	3.77	1392	10	10	3	0	65592890	73344	Identified	3492	3.8	b5b29y1y8y14*y21y22y23y26y28y29	288654	2756	237654354578874	118436236385916	0.0606	Green	8484	30264608	30264555	269049	6364	6364.00	3.00	3	10094918
NCDO2118_RS07180	lactate dehydrogenase 1498372:1499349 reverse MW:35050	Regular	32926440	0	351077616	59	10	20	42.77	105048	79163	34501	0	5	Pass1	PepFrag1	None	9775302	AIIDEAFAK	AIIDEAFAK	307	9	4.07	1390	4	4	2	1	11235570	65681		591	1.2	b2y6y7y8	253643	919	11427993248041	742799324804103	0.0086	Green	3314	9775345	9775368	221815	906	906.00	2.00	2	4892709
NCDO2118_RS07180	lactate dehydrogenase 1498372:1499349 reverse MW:35050	Regular	32926440	0	351077616	59	10	20	42.77	105048	79163	34501	0	6	Pass2	PepFrag2	None	7214243	IVASGFK	IVASGFK	108	7	10.10	1399	3	3	0	0	347106	50580		297	1.1	b7y1y7	143911	687	941305924769588	148261184953918	0.0092	Red	6688	7213914	7213933	253893	971	971.00	1.00	1	7213914
NCDO2118_RS07180	lactate dehydrogenase 1498372:1499349 reverse MW:35050	Regular	32926440	0	351077616	59	10	20	42.77	105048	79163	34501	0	7	Pass2	MissedCleavage	None	21450459	EKTQGDAEDLSHALAFTSPK	EKTQGDAEDLSHALAFTSPK	41	20	4.54	1395	1	1	0	0	2463570	59091	Missing	1004	2.7	b7b11y8y15y17y20	294774	1956	189091584549835	149091584549835	0.0332	Yellow	11319	21450464	21450430	287449	3490	3490.00	2.18	2	10730268
NCDO2118_RS07180	lactate dehydrogenase 1498372:1499349 reverse MW:35050	Regular	32926440	0	351077616	59	10	20	42.77	105048	79163	34501	0	8	Pass2	MissedCleavage	None	18929786	MEASGAQLKAIIDEAFAK	MEASGAQLKAIIDEAFAK	298	18	4.44	1396	1	1	0	0	1819748	57776		256	1.5	b8b12b18*	315871	1780	17757137968626	13757137968626	0.0074	Yellow	33098	18929861	18929846	429352	781	781.00	2.00	2	9469967
NCDO2118_RS07180	lactate dehydrogenase 1498372:1499349 reverse MW:35050	Regular	32926440	0	351077616	59	10	20	42.77	105048	79163	34501	0	9	Pass2	VarMod	Carbamidomethyl C(25);Oxidation M(51)	56907782	AILDDEHAVLPVSVFQDGQYGVSDCYLGQPAVVGAEGVVNPIHIPLNDAEMQK	AILDDEHAVLPVSVFQDGQYGVSDCYLGQPAVVGAEGVVNPIHIPLNDAEMQK	245	53	3.78	1398	10	10	1	1	11125370	65639	Identified	10510	6.0	b8b10b10b12b13b29b32y6*y9y11*y11y12*y14y15y20y20*y24y39y40*y53	358217	5217	36366948260286	105467793041144	0.1169	Green	29762	56907495	56907495	390994	12276	12276.00	4.44	5	11389557
NCDO2118_RS07180	lactate dehydrogenase 1498372:1499349 reverse MW:35050	Regular	32926440	0	351077616	59	10	20	42.77	105048	79163	34501	0	10	Pass2	VarMod	Phosphoryl STY(14)	21721140	GIFLVAANPVDILTYATWK	GIFLVAANPVDILTYATWK	115	19	6.78	1397	3	3	0	0	2313889	58819	Identified	170	1.7	b16y6y11-H3PO4y14	471078	1992	19140466729043	15140466729043	0.0104	Yellow	28314	21721049	21721012	380645	1097	1097.00	2.00	2	10865561
NCDO2118_RS07180	lactate dehydrogenase 1498372:1499349 reverse MW:35050	Regular	3971739	0	351077616	13	4	20	28.00	13178	12302	4293	1	1	Pass1	PepFrag1	None	6743468	VDVDAR	VDVDAR	162	6	3.88	427	7	7	1	2	16587050	58188		3678	2.4	b2b4b6y1y2y4y6	68872	607	86673319165689	133346638331378	0.6446	Yellow	1305	6743472	6743490	106506	8495	8495.00	1.00	1	6743472
NCDO2118_RS07180	lactate dehydrogenase 1498372:1499349 reverse MW:35050	Regular	3971739	0	351077616	13	4	20	28.00	13178	12302	4293	0	2	Pass1	PepFrag1	Carbamidomethyl C(25)	56747833	AILDDEHAVLPVSVFQDGQYGVSDCYLGQPAVVGAEGVVNPIHIPLNDAEMQK	AILDDEHAVLPVSVFQDGQYGVSDCYLGQPAVVGAEGVVNPIHIPLNDAEMQK	245	53	3.78	425	2	2	0	0	15946950	58017	Identified	166	3.5	b10y25	362308	5217	36366948260286	105467793041144	0.2053	Yellow	7464	56748045	56748045	404731	2706	2706.00	5.00	5	11357667
NCDO2118_RS07180	lactate dehydrogenase 1498372:1499349 reverse MW:35050	Regular	3971739	0	351077616	13	4	20	28.00	13178	12302	4293	0	3	Pass1	PepFrag1	None	20921477	GIFLVAANPVDILTYATWK	GIFLVAANPVDILTYATWK	115	19	6.78	426	3	3	0	0	8209391	55133	Identified	377	1.7	b7b8*y11y14	463767	1992	19140466729043	15140466729043	0.0835	Yellow	8542	20921404	20921355	486406	1101	1101.00	2.00	2	10465739
NCDO2118_RS07180	lactate dehydrogenase 1498372:1499349 reverse MW:35050	Regular	3971739	0	351077616	13	4	20	28.00	13178	12302	4293	0	4	Pass1	PepFrag1	None	12957106	GATFYGVAVALAR	GATFYGVAVALAR	229	13	9.84	428	1	1	0	0	14625090	57641		72	1.4	y9	295555	1215	137660862467225	97660862467225	0.0665	Yellow	6050	12957122	12957129	326980	876	876.00	2.00	2	6483597
NCDO2118_RS07180	lactate dehydrogenase 1498372:1499349 reverse MW:35050	Regular	27281790	0	351077616	67	7	20	27.69	418122	247888	140841	1	1	Pass1	PepFrag1	None	6823559	FSGFPK	FSGFPK	134	6	10.10	600	9	9	7	3	64665210	72465	Identified	65126	4.0	b2b2b3b3b4b4y1y2y3y4y5y6	146456	616	875279537689346	135055907537869	0.3920	Green	2650	6823536	6823551	182868	163912	163912.00	1.00	1	6823536
NCDO2118_RS07180	lactate dehydrogenase 1498372:1499349 reverse MW:35050	Regular	27281790	0	351077616	67	7	20	27.69	418122	247888	140841	0	2	Pass1	PepFrag1	None	7214243	IVASGFK	IVASGFK	108	7	10.10	599	12	12	9	4	828770000	83543		24051	5.4	b2b3b4b5b5b7y1y2y3y4y4y5y5y6y6y7	156553	687	941305924769588	148261184953918	0.1664	Green	1436	7214231	7214245	150984	69593	69593.00	1.00	1	7214231
NCDO2118_RS07180	lactate dehydrogenase 1498372:1499349 reverse MW:35050	Regular	27281790	0	351077616	67	7	20	27.69	418122	247888	140841	0	3	Pass1	PepFrag1	None	18879083	TQGDAEDLSHALAFTSPK	TQGDAEDLSHALAFTSPK	43	18	4.30	597	7	7	1	1	14608910	66005	Identified	3375	4.3	b2b9b18y2y5y6y8y16y16	250481	1712	173019668035187	753464453567915	0.0344	Green	8274	18879034	18879064	259068	14383	14383.00	3.00	3	6299726
NCDO2118_RS07180	lactate dehydrogenase 1498372:1499349 reverse MW:35050	Regular	27281790	0	351077616	67	7	20	27.69	418122	247888	140841	0	4	Pass1	PepFrag1	None	11626062	VVGSGTSLDTAR	VVGSGTSLDTAR	142	12	7.00	594	7	7	5	1	66773430	72605		2971	3.3	b2y5y6y7y8y9y10	158735	1068	126320490295024	863204902950241	0.0251	Green	1282	11626020	11626047	141395	10487	10487.00	2.00	2	5818047
NCDO2118_RS07180	lactate dehydrogenase 1498372:1499349 reverse MW:35050	Regular	27281790	0	351077616	67	7	20	27.69	418122	247888	140841	0	5	Pass1	PepFrag1	None	30264589	IYSADYSDASDADLVVLTSGAPQKPGETR	IYSADYSDASDADLVVLTSGAPQKPGETR	62	29	3.77	598	8	8	3	1	26084790	68523	Identified	1320	4.4	b2b6y8y9y11y11y21y22y23	273947	2756	237654354578874	118436236385916	0.0231	Green	9408	30264736	30264648	273324	9644	9644.00	3.00	3	10094961
NCDO2118_RS07180	lactate dehydrogenase 1498372:1499349 reverse MW:35050	Regular	27281790	0	351077616	67	7	20	27.69	418122	247888	140841	0	6	Pass1	PepFrag1	None	9775302	AIIDEAFAK	AIIDEAFAK	307	9	4.07	596	5	5	2	0	93673510	74075		2107	2.5	y3y5y6y7y9	230653	919	11427993248041	742799324804103	0.0148	Green	5808	9775246	9775277	228262	6188	6188.00	1.86	2	4892659
NCDO2118_RS07180	lactate dehydrogenase 1498372:1499349 reverse MW:35050	Regular	27281790	0	351077616	67	7	20	27.69	418122	247888	140841	0	7	Pass1	PepFrag1	None	9515146	DAAYSIIAK	DAAYSIIAK	219	9	6.78	595	1	1	0	0	1493091	56100		49	1.4	y7	191712	889	111779151384407	71779151384407	0.0030	Yellow	5269	9515075	9515108	222094	1271	1271.00	2.00	2	4762574
NCDO2118_RS07180	lactate dehydrogenase 1498372:1499349 reverse MW:35050	Regular	27281790	0	351077616	67	7	20	27.69	418122	247888	140841	0	8	Pass2	InSource	None	5352875	SGFPK	FSGFPK	135	5	10.10	600	9	9	7	3	203215000	0.0000	Identified	32824	0.0	b2b3b3b4b5y1y2y3y4y5	146456	481	7422035349121	10844070698242	0.2332	Green	2649	5352849	5352864	182867	97512	97512.00	1.00	1	5352849
NCDO2118_RS07180	lactate dehydrogenase 1498372:1499349 reverse MW:35050	Regular	27281790	0	351077616	67	7	20	27.69	418122	247888	140841	0	9	Pass2	InSource	None	5092718	ASGFK	IVASGFK	110	5	10.10	599	9	9	7	3	503993000	0.0000		9018	0.0	b2b2b3b3b4b4b5b5y1y2y3y4y4y5	156553	458	718350865789055	103670173157811	0.1079	Green	1440	5092707	5092722	151030	45132	45132.00	1.00	1	5092707
NCDO2118_RS07180	lactate dehydrogenase 1498372:1499349 reverse MW:35050	Regular	42315600	0	351077616	44	6	20	36.31	163378	148364	100717	1	1	Pass1	PepFrag1	Carbamidomethyl C(25)	56747833	AILDDEHAVLPVSVFQDGQYGVSDCYLGQPAVVGAEGVVNPIHIPLNDAEMQK	AILDDEHAVLPVSVFQDGQYGVSDCYLGQPAVVGAEGVVNPIHIPLNDAEMQK	245	53	3.78	1167	10	10	2	1	50804170	73324	Identified	71566	12.8	b9b10b14b20b29y9y17y18y20y24y26y53	352274	5217	36366948260286	14183474130143	0.5883	Green	32283	56748288	56748068	396916	96110	96110.00	4.40	4	14194627
NCDO2118_RS07180	lactate dehydrogenase 1498372:1499349 reverse MW:35050	Regular	42315600	0	351077616	44	6	20	36.31	163378	148364	100717	0	2	Pass1	PepFrag1	None	20921477	GIFLVAANPVDILTYATWK	GIFLVAANPVDILTYATWK	115	19	6.78	1168	20	20	15	7	578148900	83885	Identified	18876	7.0	b3b4b5b6b7b8b10b12*b14*y2y3y4y5y6y7y9y10y11y11y12y13y14y15y15*y16y19*	474954	1992	19140466729043	15140466729043	0.3097	Green	38685	20921539	20921512	481494	50598	50598.00	2.17	2	10465806
NCDO2118_RS07180	lactate dehydrogenase 1498372:1499349 reverse MW:35050	Regular	42315600	0	351077616	44	6	20	36.31	163378	148364	100717	0	3	Pass1	PepFrag1	None	18389535	AIIDEAFAKEEFASAVK	AIIDEAFAKEEFASAVK	307	17	4.16	1166	4	4	2	0	3070071	61136		1287	1.9	b3b7b8y3y4y5y12	332118	1719	173490974042038	133490974042038	0.0101	Green	9904	18389551	18389544	269442	1656	1656.00	2.13	2	9199812
NCDO2118_RS07180	lactate dehydrogenase 1498372:1499349 reverse MW:35050	Regular	42315600	0	351077616	44	6	20	36.31	163378	148364	100717	0	4	Pass2	PepFrag2	None	9515146	DAAYSIIAK	DAAYSIIAK	219	9	6.78	1169	1	1	0	0	2547767	60327		94	1.2	b9y6	211721	889	111779151384407	71779151384407	0.0050	Green	1862	9515221	9515248	179272	824	824.00	2.00	2	4762647
NCDO2118_RS07180	lactate dehydrogenase 1498372:1499349 reverse MW:35050	Regular	42315600	0	351077616	44	6	20	36.31	163378	148364	100717	0	5	Pass2	MissedCleavage	None	21450459	EKTQGDAEDLSHALAFTSPK	EKTQGDAEDLSHALAFTSPK	41	20	4.54	1170	4	4	1	1	14747710	67952	Missing	1094	2.3	b7*b12b13b14b16*b20y6y7y9y20	287145	1956	189091584549835	149091584549835	0.0136	Green	12296	21450678	21450647	284965	2225	2225.00	2.22	2	10730375
NCDO2118_RS07180	lactate dehydrogenase 1498372:1499349 reverse MW:35050	Regular	42315600	0	351077616	44	6	20	36.31	163378	148364	100717	0	6	Pass2	VarMod	Carbamidomethyl C(25);Oxidation M(51)	56907782	AILDDEHAVLPVSVFQDGQYGVSDCYLGQPAVVGAEGVVNPIHIPLNDAEMQK	AILDDEHAVLPVSVFQDGQYGVSDCYLGQPAVVGAEGVVNPIHIPLNDAEMQK	245	53	3.78	1171	5	5	0	0	5676122	63806	Identified	7800	6.0	b6b16b17b25*y4*y5*y7*y9y13y24y43y53	352274	5217	36366948260286	105467793041144	0.0732	Green	31223	56907361	56907361	388892	11965	11965.00	4.48	5	11389530
NCDO2118_RS07180	lactate dehydrogenase 1498372:1499349 reverse MW:35050	Regular	2000043	0	351077616	23	6	20	32.00	34775	30409	10906	1	1	Pass1	PepFrag1	None	6743468	VDVDAR	VDVDAR	162	6	3.88	824	7	7	2	2	14251640	54549		8700	3.4	b2b4b5b6y2y4y6	71390	607	86673319165689	133346638331378	0.6604	Red	1375	6743464	6743479	106115	22964	22964.00	1.00	1	6743464
NCDO2118_RS07180	lactate dehydrogenase 1498372:1499349 reverse MW:35050	Regular	2000043	0	351077616	23	6	20	32.00	34775	30409	10906	0	2	Pass1	PepFrag1	Carbamidomethyl C(25)	56747833	AILDDEHAVLPVSVFQDGQYGVSDCYLGQPAVVGAEGVVNPIHIPLNDAEMQK	AILDDEHAVLPVSVFQDGQYGVSDCYLGQPAVVGAEGVVNPIHIPLNDAEMQK	245	53	3.78	820	2	2	0	0	1954732	45921	Missing	573	4.5	b9b13y10*y11*y11y20	349145	5217	36366948260286	105467793041144	0.1585	Red	8344	56748080	56748080	403458	5512	5512.00	4.90	5	11357674
NCDO2118_RS07180	lactate dehydrogenase 1498372:1499349 reverse MW:35050	Regular	2000043	0	351077616	23	6	20	32.00	34775	30409	10906	0	3	Pass1	PepFrag1	None	6823559	FSGFPK	FSGFPK	134	6	10.10	823	2	2	0	0	1332311	44256	Identified	484	1.4	b3y2y6	144527	616	875279537689346	135055907537869	0.0556	Red	4603	6823534	6823548	185827	1933	1933.00	1.00	1	6823534
NCDO2118_RS07180	lactate dehydrogenase 1498372:1499349 reverse MW:35050	Regular	2000043	0	351077616	23	6	20	32.00	34775	30409	10906	0	4	Pass1	PepFrag1	None	12957106	GATFYGVAVALAR	GATFYGVAVALAR	229	13	9.84	825	2	2	0	0	17788440	55512		204	1.7	y6y9	314559	1215	137660862467225	97660862467225	0.0422	Red	6925	12957039	12957045	324039	1466	1466.00	2.00	2	6483556
NCDO2118_RS07180	lactate dehydrogenase 1498372:1499349 reverse MW:35050	Regular	2000043	0	351077616	23	6	20	32.00	34775	30409	10906	0	5	Pass1	PepFrag1	None	20921477	GIFLVAANPVDILTYATWK	GIFLVAANPVDILTYATWK	115	19	6.78	821	8	8	5	3	10858030	53368	Identified	570	1.9	b5b6b7b8y11y12y13y19	469464	1992	19140466729043	15140466729043	0.0421	Red	9380	20921674	20921628	485057	1463	1463.00	2.00	2	10465874
NCDO2118_RS07180	lactate dehydrogenase 1498372:1499349 reverse MW:35050	Regular	2000043	0	351077616	23	6	20	32.00	34775	30409	10906	0	6	Pass1	PepFrag1	None	7214243	IVASGFK	IVASGFK	108	7	10.10	822	2	2	0	0	2193911	46423		375	1.3	y4y7	164206	687	941305924769588	148261184953918	0.0413	Red	3383	7214284	7214297	151666	1437	1437.00	1.00	1	7214284
NCDO2118_RS07180	lactate dehydrogenase 1498372:1499349 reverse MW:35050	Regular	43033040	0	351077616	75	9	20	40.62	260605	214934	100762	1	1	Pass1	PepFrag1	None	7214243	IVASGFK	IVASGFK	108	7	10.10	492	13	13	11	5	805261800	85397		60464	6.0	b2b3b4b5b5b6b6b7b7y1y2y3y4y4y5y5y6y7	157659	687	941305924769588	148261184953918	0.5579	Green	1467	7214244	7214255	150576	145402	145402.00	1.01	1	7214244
NCDO2118_RS07180	lactate dehydrogenase 1498372:1499349 reverse MW:35050	Regular	43033040	0	351077616	75	9	20	40.62	260605	214934	100762	0	2	Pass1	PepFrag1	None	18879083	TQGDAEDLSHALAFTSPK	TQGDAEDLSHALAFTSPK	43	18	4.30	490	17	17	8	4	117281300	77030	Identified	18982	6.7	b1b2b6b7b10b16b18b18*y2y4y5y6y7y9y10y11y12y13y14y15y16y16y17*y18y18*	256076	1712	173019668035187	753464453567915	0.1832	Green	11803	18879013	18879042	257410	47755	47755.00	2.85	3	6299720
NCDO2118_RS07180	lactate dehydrogenase 1498372:1499349 reverse MW:35050	Regular	43033040	0	351077616	75	9	20	40.62	260605	214934	100762	0	3	Pass1	PepFrag1	None	11626062	VVGSGTSLDTAR	VVGSGTSLDTAR	142	12	7.00	488	13	13	11	3	333161400	81565		7824	4.3	b2b3b4y3y4y5y6y7y8y9y10y10y11y11y12	154227	1068	126320490295024	863204902950241	0.0836	Green	1252	11626106	11626119	141172	21777	21777.00	2.00	2	5818089
NCDO2118_RS07180	lactate dehydrogenase 1498372:1499349 reverse MW:35050	Regular	43033040	0	351077616	75	9	20	40.62	260605	214934	100762	0	4	Pass1	PepFrag1	None	30264589	IYSADYSDASDADLVVLTSGAPQKPGETR	IYSADYSDASDADLVVLTSGAPQKPGETR	62	29	3.77	491	12	12	2	2	60358850	74145	Identified	7089	5.6	b2b3b5b5b7b8b14b16b29y5y8y14y23y24y27y29	277009	2756	237654354578874	118436236385916	0.0699	Green	13447	30264652	30264565	272253	18220	18220.00	3.00	3	10094932
NCDO2118_RS07180	lactate dehydrogenase 1498372:1499349 reverse MW:35050	Regular	43033040	0	351077616	75	9	20	40.62	260605	214934	100762	0	5	Pass1	PepFrag1	None	9775302	AIIDEAFAK	AIIDEAFAK	307	9	4.07	489	5	5	2	0	49314840	73268		4967	3.6	b4y3y5y6y7y9	236058	919	11427993248041	742799324804103	0.0651	Green	8005	9775245	9775262	227911	16956	16956.00	1.84	2	4892659
NCDO2118_RS07180	lactate dehydrogenase 1498372:1499349 reverse MW:35050	Regular	43033040	0	351077616	75	9	20	40.62	260605	214934	100762	0	6	Pass1	PepFrag1	None	9344662	MEASGAQLK	MEASGAQLK	298	9	7.00	487	1	1	0	0	4620730	62985		93	1.2	y7	126433	861	109419586314633	694195863146326	0.0036	Green	1029	9344729	9344747	122296	942	942.00	2.00	2	4677401
NCDO2118_RS07180	lactate dehydrogenase 1498372:1499349 reverse MW:35050	Regular	43033040	0	351077616	75	9	20	40.62	260605	214934	100762	0	7	Pass2	PepFrag2	None	6823559	FSGFPK	FSGFPK	134	6	10.10	495	1	1	0	0	679843	54662	Missing	68	1.2	y3	149239	616	875279537689346	135055907537869	0.0046	Yellow	7497	6823285	6823297	223712	1200	1200.00	1.00	1	6823285
NCDO2118_RS07180	lactate dehydrogenase 1498372:1499349 reverse MW:35050	Regular	43033040	0	351077616	75	9	20	40.62	260605	214934	100762	0	8	Pass2	MissedCleavage	None	35677074	VDVDARSIHAYIMGEHGDSEFAVWSHANVAGVK	VDVDARSIHAYIMGEHGDSEFAVWSHANVAGVK	162	33	5.15	493	3	3	0	0	5356292	63627		313	2.8	b7b13b14b15b18y10	314585	3258	265701305026364	928506525131821	0.0088	Green	21562	35676945	35676945	352543	2292	2292.00	3.68	4	8926791
NCDO2118_RS07180	lactate dehydrogenase 1498372:1499349 reverse MW:35050	Regular	43033040	0	351077616	75	9	20	40.62	260605	214934	100762	0	9	Pass2	MissedCleavage	None	9944840	EEFASAVKN	EEFASAVKN	316	9	4.26	494	1	1	0	0	4054394	62417		56	1.3	y5	166027	896	112365151230056	723651512300563	0.0038	Green	3992	9944845	9944862	189647	999	999.00	2.00	2	4977459
NCDO2118_RS07180	lactate dehydrogenase 1498372:1499349 reverse MW:35050	Regular	43033040	0	351077616	75	9	20	40.62	260605	214934	100762	0	10	Pass2	InSource	None	6803250	DEAFAK	AIIDEAFAK	310	6	4.07	489	6	6	3	2	118363600	0.0000		614	0.0	b2b3b4y3y4y6	236058	604	8638750410384	13277500820768	0.0102	Green	8000	6803269	6803281	227895	2650	2650.00	1.00	1	6803269
NCDO2118_RS07180	lactate dehydrogenase 1498372:1499349 reverse MW:35050	Regular	43033040	0	351077616	75	9	20	40.62	260605	214934	100762	0	11	Pass2	InSource	None	4382347	SGFK	IVASGFK	111	4	10.10	492	3	3	1	0	1977595	0.0000		292	0.0	y1y2y4	157659	391	646463693410357	892927386820714	0.0093	Green	1460	4382317	4382329	150543	2412	2412.00	1.00	1	4382317
NCDO2118_RS07180	lactate dehydrogenase 1498372:1499349 reverse MW:35050	Regular	51709460	0	351077616	82	9	20	53.54	229173	181136	130833	1	1	Pass1	PepFrag1	Carbamidomethyl C(25)	56747833	AILDDEHAVLPVSVFQDGQYGVSDCYLGQPAVVGAEGVVNPIHIPLNDAEMQK	AILDDEHAVLPVSVFQDGQYGVSDCYLGQPAVVGAEGVVNPIHIPLNDAEMQK	245	53	3.78	1261	29	29	15	3	60711180	74968	Identified	82901	13.9	b5b8b9b10b10b11b12b13b13b14b15b15b16b17b17b22b22b27y3y5*y7*y9y10y12y15y16y17y20y21y22y23y24y26y27y27*y28y31y33y34y38*y42y43*y53y53*	347905	5217	36366948260286	105467793041144	0.5280	Green	44512	56747999	56747999	392896	120993	120993.00	4.60	5	11357658
NCDO2118_RS07180	lactate dehydrogenase 1498372:1499349 reverse MW:35050	Regular	51709460	0	351077616	82	9	20	53.54	229173	181136	130833	0	2	Pass1	PepFrag1	None	20921477	GIFLVAANPVDILTYATWK	GIFLVAANPVDILTYATWK	115	19	6.78	1262	22	22	18	8	657767100	85316	Identified	17006	6.4	b2b3b4b5b6b7b8b9b10b15b15*y2y3y4y5y6y8y9y10y11y12y13y14y15y19*	479956	1992	19140466729043	15140466729043	0.1741	Green	53402	20921487	20921470	480002	39904	39904.00	2.16	2	10465780
NCDO2118_RS07180	lactate dehydrogenase 1498372:1499349 reverse MW:35050	Regular	51709460	0	351077616	82	9	20	53.54	229173	181136	130833	0	3	Pass1	PepFrag1	None	18879083	TQGDAEDLSHALAFTSPK	TQGDAEDLSHALAFTSPK	43	18	4.30	1258	6	6	2	1	29068040	71770	Missing	3550	4.9	b3y7y11y12y15y16y17*	246053	1712	173019668035187	753464453567915	0.0883	Green	10518	18879073	18879099	249696	20239	20239.00	3.00	3	6299740
NCDO2118_RS07180	lactate dehydrogenase 1498372:1499349 reverse MW:35050	Regular	51709460	0	351077616	82	9	20	53.54	229173	181136	130833	0	4	Pass1	PepFrag1	None	30264589	IYSADYSDASDADLVVLTSGAPQKPGETR	IYSADYSDASDADLVVLTSGAPQKPGETR	62	29	3.77	1259	7	7	3	1	17548340	69578	Missing	5573	5.0	b2b5b6y10y12*y22y24y25y26y27y29	282663	2756	237654354578874	118436236385916	0.0594	Green	13429	30264622	30264554	264048	13620	13620.00	3.00	3	10094922
NCDO2118_RS07180	lactate dehydrogenase 1498372:1499349 reverse MW:35050	Regular	51709460	0	351077616	82	9	20	53.54	229173	181136	130833	0	5	Pass1	PepFrag1	None	12957106	GATFYGVAVALAR	GATFYGVAVALAR	229	13	9.84	1260	3	3	0	0	3358974	62398		436	1.6	b4b5y5y9	299725	1215	137660862467225	97660862467225	0.0058	Green	28095	12957170	12957191	323143	1329	1329.00	2.00	2	6483622
NCDO2118_RS07180	lactate dehydrogenase 1498372:1499349 reverse MW:35050	Regular	51709460	0	351077616	82	9	20	53.54	229173	181136	130833	0	6	Pass2	PepFrag2	None	9775302	AIIDEAFAK	AIIDEAFAK	307	9	4.07	1266	2	2	0	0	1612741	59211		97	1.9	b5y8	243018	919	11427993248041	188559864960821	0.0134	Yellow	30875	9775686	9775704	334324	3070	3070.00	1.00	1	9775686
NCDO2118_RS07180	lactate dehydrogenase 1498372:1499349 reverse MW:35050	Regular	51709460	0	351077616	82	9	20	53.54	229173	181136	130833	0	7	Pass2	MissedCleavage	None	35677074	VDVDARSIHAYIMGEHGDSEFAVWSHANVAGVK	VDVDARSIHAYIMGEHGDSEFAVWSHANVAGVK	162	33	5.15	1264	4	4	0	0	7556232	65919		894	2.4	b3b4b27b32y10*y12*y14y22y25	325246	3258	265701305026364	928506525131821	0.0070	Green	27801	35676648	35676615	322067	1601	1601.00	4.00	4	8926717
NCDO2118_RS07180	lactate dehydrogenase 1498372:1499349 reverse MW:35050	Regular	51709460	0	351077616	82	9	20	53.54	229173	181136	130833	0	8	Pass2	MissedCleavage	None	12637307	DVVTKIVASGFK	DVVTKIVASGFK	103	12	9.88	1263	2	2	0	0	607365	54970		806	1.4	b5y2	226731	1216	1377363861906	977363861906001	0.0045	Red	23818	12637385	12637407	305502	1026	1026.00	2.24	2	6323729
NCDO2118_RS07180	lactate dehydrogenase 1498372:1499349 reverse MW:35050	Regular	51709460	0	351077616	82	9	20	53.54	229173	181136	130833	0	9	Pass2	VarMod	Carbamidomethyl C(25);Oxidation M(51)	56907782	AILDDEHAVLPVSVFQDGQYGVSDCYLGQPAVVGAEGVVNPIHIPLNDAEMQK	AILDDEHAVLPVSVFQDGQYGVSDCYLGQPAVVGAEGVVNPIHIPLNDAEMQK	245	53	3.78	1265	7	7	0	0	3062522	61996	Identified	19570	8.1	b5b18*b26*b28b45y11y20y24y25*y26y32y53	347905	5217	36366948260286	105467793041144	0.1195	Green	43003	56908097	56908097	385354	27391	27391.00	4.49	5	11389678
NCDO2118_RS07180	lactate dehydrogenase 1498372:1499349 reverse MW:35050	Regular	7492300	0	351077616	41	6	20	30.15	40347	29539	17291	1	1	Pass1	PepFrag1	Carbamidomethyl C(25)	56747833	AILDDEHAVLPVSVFQDGQYGVSDCYLGQPAVVGAEGVVNPIHIPLNDAEMQK	AILDDEHAVLPVSVFQDGQYGVSDCYLGQPAVVGAEGVVNPIHIPLNDAEMQK	245	53	3.78	473	10	10	0	0	12557650	59735	Identified	11186	6.9	b9b12b13b14b16b19y8y10y20y24y26y53	348737	5217	36366948260286	105467793041144	0.4429	Yellow	8014	56747938	56747938	402783	17869	17869.00	4.52	5	11357646
NCDO2118_RS07180	lactate dehydrogenase 1498372:1499349 reverse MW:35050	Regular	7492300	0	351077616	41	6	20	30.15	40347	29539	17291	0	2	Pass1	PepFrag1	None	7214243	IVASGFK	IVASGFK	108	7	10.10	475	7	7	5	1	177447500	71237		2094	2.3	b2y2y3y4y5y6y7	162096	687	941305924769588	148261184953918	0.1558	Green	2119	7214245	7214260	151760	6285	6285.00	1.00	1	7214245
NCDO2118_RS07180	lactate dehydrogenase 1498372:1499349 reverse MW:35050	Regular	7492300	0	351077616	41	6	20	30.15	40347	29539	17291	0	3	Pass1	PepFrag1	None	6823559	FSGFPK	FSGFPK	134	6	10.10	476	5	5	2	1	7980167	57766	Identified	1564	2.0	b3b3y2y3y5y6	122672	616	875279537689346	135055907537869	0.1335	Red	2987	6823575	6823590	184576	5385	5385.00	1.00	1	6823575
NCDO2118_RS07180	lactate dehydrogenase 1498372:1499349 reverse MW:35050	Regular	7492300	0	351077616	41	6	20	30.15	40347	29539	17291	0	4	Pass1	PepFrag1	None	12957106	GATFYGVAVALAR	GATFYGVAVALAR	229	13	9.84	472	4	4	2	0	10952350	59141		823	2.1	y5y7y8y9	292976	1215	137660862467225	97660862467225	0.0659	Red	5915	12957096	12957107	322091	2658	2658.00	2.00	2	6483584
NCDO2118_RS07180	lactate dehydrogenase 1498372:1499349 reverse MW:35050	Regular	7492300	0	351077616	41	6	20	30.15	40347	29539	17291	0	5	Pass1	PepFrag1	None	20921477	GIFLVAANPVDILTYATWK	GIFLVAANPVDILTYATWK	115	19	6.78	474	5	5	2	1	16440390	60905	Identified	232	2.0	b6b7b8y11y14	466210	1992	19140466729043	15140466729043	0.0434	Yellow	9315	20921407	20921368	483980	1750	1750.00	2.14	2	10465740
NCDO2118_RS07180	lactate dehydrogenase 1498372:1499349 reverse MW:35050	Regular	7492300	0	351077616	41	6	20	30.15	40347	29539	17291	0	6	Pass2	PepFrag2	None	30264589	IYSADYSDASDADLVVLTSGAPQKPGETR	IYSADYSDASDADLVVLTSGAPQKPGETR	62	29	3.77	477	3	3	2	0	851084	48046	Missing	106	1.8	y9y10y11	278465	2756	237654354578874	118436236385916	0.0209	Red	8610	30265821	30265764	432005	844	844.00	3.00	3	10095322
NCDO2118_RS07180	lactate dehydrogenase 1498372:1499349 reverse MW:35050	Regular	7492300	0	351077616	41	6	20	30.15	40347	29539	17291	0	7	Pass2	InSource	None	5352875	SGFPK	FSGFPK	135	5	10.10	476	2	2	0	0	776408	0.0000	Identified	700	0.0	y2y5	122672	481	7422035349121	10844070698242	0.0729	Red	2986	5352851	5352866	184565	2940	2940.00	1.00	1	5352851
NCDO2118_RS07180	lactate dehydrogenase 1498372:1499349 reverse MW:35050	Regular	7492300	0	351077616	41	6	20	30.15	40347	29539	17291	0	8	Pass2	InSource	None	6083402	VASGFK	IVASGFK	109	6	10.10	475	5	5	3	0	34246340	0.0000		586	0.0	b4y3y4y5y6	162096	563	824325176210551	12486503524211	0.0648	Green	2121	6083409	6083424	151801	2616	2616.00	1.00	1	6083409
NCDO2118_RS07180	lactate dehydrogenase 1498372:1499349 reverse MW:35050	Regular	20445450	0	351077616	33	6	20	42.15	30482	24793	9912	1	1	Pass1	PepFrag1	None	20921477	GIFLVAANPVDILTYATWK	GIFLVAANPVDILTYATWK	115	19	6.78	923	18	18	10	5	313724500	78071	Identified	5306	4.0	b3b4b5b6b7b8b8*b11y2y3y5y7y8y9y11y12y13y14y15y19y19*	462157	1992	19140466729043	15140466729043	0.3523	Green	32532	20921512	20921480	481485	10739	10739.00	2.14	2	10465793
NCDO2118_RS07180	lactate dehydrogenase 1498372:1499349 reverse MW:35050	Regular	20445450	0	351077616	33	6	20	42.15	30482	24793	9912	0	2	Pass1	PepFrag1	None	18879083	TQGDAEDLSHALAFTSPK	TQGDAEDLSHALAFTSPK	43	18	4.30	924	3	3	0	0	22921890	66708	Identified	1531	3.3	b2b16y9y18	243625	1712	173019668035187	753464453567915	0.2327	Green	6501	18879049	18879076	258725	7094	7094.00	2.87	3	6299732
NCDO2118_RS07180	lactate dehydrogenase 1498372:1499349 reverse MW:35050	Regular	20445450	0	351077616	33	6	20	42.15	30482	24793	9912	0	3	Pass1	PepFrag1	Carbamidomethyl C(25)	56747833	AILDDEHAVLPVSVFQDGQYGVSDCYLGQPAVVGAEGVVNPIHIPLNDAEMQK	AILDDEHAVLPVSVFQDGQYGVSDCYLGQPAVVGAEGVVNPIHIPLNDAEMQK	245	53	3.78	925	3	3	1	0	1550528	55011	Missing	1622	4.9	b13b14b51y14*y16y45	340492	5217	36366948260286	812231608676201	0.2283	Yellow	27376	56748319	56748319	407391	6960	6960.00	6.00	6	9466447
NCDO2118_RS07180	lactate dehydrogenase 1498372:1499349 reverse MW:35050	Regular	20445450	0	351077616	33	6	20	42.15	30482	24793	9912	0	4	Pass1	PepFrag1	None	30264589	IYSADYSDASDADLVVLTSGAPQKPGETR	IYSADYSDASDADLVVLTSGAPQKPGETR	62	29	3.77	922	4	4	1	0	5623953	60606	Missing	624	2.6	b2y24y25y29	282657	2756	237654354578874	118436236385916	0.0723	Green	7563	30264478	30264412	269507	2205	2205.00	3.00	3	10094874
NCDO2118_RS07180	lactate dehydrogenase 1498372:1499349 reverse MW:35050	Regular	20445450	0	351077616	33	6	20	42.15	30482	24793	9912	0	5	Pass1	PepFrag1	None	9775302	AIIDEAFAK	AIIDEAFAK	307	9	4.07	926	1	1	0	0	2904314	57736		32	1.3	y4	241463	919	11427993248041	742799324804103	0.0381	Yellow	2954	9775253	9775282	217366	1162	1162.00	2.00	2	4892663
NCDO2118_RS07180	lactate dehydrogenase 1498372:1499349 reverse MW:35050	Regular	20445450	0	351077616	33	6	20	42.15	30482	24793	9912	0	6	Pass2	MissedCleavage	None	18929786	MEASGAQLKAIIDEAFAK	MEASGAQLKAIIDEAFAK	298	18	4.44	927	4	4	0	0	12054050	63917		797	2.2	b8b11b12b17y9y12y17*	323850	1780	17757137968626	783809197908399	0.0762	Green	17764	18929745	18929771	337201	2322	2322.00	2.86	3	6316630
NCDO2118_RS07180	lactate dehydrogenase 1498372:1499349 reverse MW:35050	Regular	21762380	0	351077616	53	7	20	24.00	202424	176879	67744	1	1	Pass1	PepFrag1	None	6823559	FSGFPK	FSGFPK	134	6	10.10	771	9	9	7	3	65036410	71509	Identified	45946	4.0	b2b3b3b4b4y1y2y3y4y5y6	145364	616	875279537689346	135055907537869	0.6480	Green	2800	6823558	6823575	182543	131162	131162.00	1.00	1	6823558
NCDO2118_RS07180	lactate dehydrogenase 1498372:1499349 reverse MW:35050	Regular	21762380	0	351077616	53	7	20	24.00	202424	176879	67744	0	2	Pass1	PepFrag1	None	7214243	IVASGFK	IVASGFK	108	7	10.10	770	11	11	7	3	719385300	81947		12488	4.3	b2b3b5b5b7y1y2y3y4y4y5y5y6y7	158320	687	941305924769588	148261184953918	0.1819	Green	1447	7214229	7214244	150684	36819	36819.00	1.00	1	7214229
NCDO2118_RS07180	lactate dehydrogenase 1498372:1499349 reverse MW:35050	Regular	21762380	0	351077616	53	7	20	24.00	202424	176879	67744	0	3	Pass1	PepFrag1	None	11626062	VVGSGTSLDTAR	VVGSGTSLDTAR	142	12	7.00	767	6	6	3	1	59014630	71087		2443	3.1	b2y5y7y8y9y10y10	158654	1068	126320490295024	863204902950241	0.0440	Green	1263	11626051	11626072	141132	8898	8898.00	2.00	2	5818062
NCDO2118_RS07180	lactate dehydrogenase 1498372:1499349 reverse MW:35050	Regular	21762380	0	351077616	53	7	20	24.00	202424	176879	67744	0	4	Pass1	PepFrag1	None	30264589	IYSADYSDASDADLVVLTSGAPQKPGETR	IYSADYSDASDADLVVLTSGAPQKPGETR	62	29	3.77	769	10	10	4	2	22725250	66942	Missing	2457	4.1	b2b5b6b8y19y22y23y24y28y29	270887	2756	237654354578874	118436236385916	0.0375	Green	10533	30264646	30264584	271687	7599	7599.00	3.00	3	10094930
NCDO2118_RS07180	lactate dehydrogenase 1498372:1499349 reverse MW:35050	Regular	21762380	0	351077616	53	7	20	24.00	202424	176879	67744	0	5	Pass1	PepFrag1	None	9775302	AIIDEAFAK	AIIDEAFAK	307	9	4.07	768	3	3	1	0	28172570	67875		1051	1.9	y6y7y9	234341	919	11427993248041	742799324804103	0.0145	Green	6339	9775265	9775291	227870	2943	2943.00	1.82	2	4892669
NCDO2118_RS07180	lactate dehydrogenase 1498372:1499349 reverse MW:35050	Regular	21762380	0	351077616	53	7	20	24.00	202424	176879	67744	0	6	Pass2	PepFrag2	None	7164189	LDLVEK	LDLVEK	91	6	4.07	773	3	3	1	0	4349603	59762		666	1.0	y2y3y6	179472	688	942219149137295	148443829827459	0.0044	Green	4551	7163959	7163975	206411	890	890.00	1.00	1	7163959
NCDO2118_RS07180	lactate dehydrogenase 1498372:1499349 reverse MW:35050	Regular	21762380	0	351077616	53	7	20	24.00	202424	176879	67744	0	7	Pass2	VarMod	Oxidation M(1)	19089735	MEASGAQLKAIIDEAFAK	MEASGAQLKAIIDEAFAK	298	18	4.44	772	4	4	0	0	9930890	63347		1184	3.2	b10*b12*b13y9y15y18	276060	1780	17757137968626	13757137968626	0.0303	Green	15856	19089738	19089714	343058	6135	6135.00	2.04	2	9549905
NCDO2118_RS07180	lactate dehydrogenase 1498372:1499349 reverse MW:35050	Regular	21762380	0	351077616	53	7	20	24.00	202424	176879	67744	0	8	Pass2	InSource	None	4482554	GFPK	FSGFPK	136	4	10.10	771	3	3	1	0	1514113	0.0000	Identified	1044	0.0	y1y2y4	145364	408	665068547459113	930137094918227	0.0326	Green	2807	4482529	4482546	182575	6606	6606.00	1.00	1	4482529
NCDO2118_RS07180	lactate dehydrogenase 1498372:1499349 reverse MW:35050	Regular	21762380	0	351077616	53	7	20	24.00	202424	176879	67744	0	9	Pass2	InSource	None	7934090	IDEAFAK	AIIDEAFAK	309	7	4.07	768	4	4	0	0	9724321	0.0000		465	0.0	b3y3y5y7	234341	728	978394239574307	155678847914861	0.0068	Green	6329	7934113	7934127	227702	1372	1372.00	1.00	1	7934113
NCDO2118_RS07180	lactate dehydrogenase 1498372:1499349 reverse MW:35050	Regular	28456150	0	351077616	69	13	20	64.00	127790	93203	29784	1	1	Pass1	PepFrag1	Carbamidomethyl C(25)	56747833	AILDDEHAVLPVSVFQDGQYGVSDCYLGQPAVVGAEGVVNPIHIPLNDAEMQK	AILDDEHAVLPVSVFQDGQYGVSDCYLGQPAVVGAEGVVNPIHIPLNDAEMQK	245	53	3.78	1873	8	8	1	0	40144640	70578	Identified	6305	10.5	b4b9b10b13b15y2y4y10y21y24y27	361069	5217	36366948260286	14183474130143	0.4413	Green	38195	56748020	56747827	395558	56400	56400.00	4.39	4	14194560
NCDO2118_RS07180	lactate dehydrogenase 1498372:1499349 reverse MW:35050	Regular	28456150	0	351077616	69	13	20	64.00	127790	93203	29784	0	2	Pass1	PepFrag1	None	20921477	GIFLVAANPVDILTYATWK	GIFLVAANPVDILTYATWK	115	19	6.78	1874	19	19	12	6	344414100	79913	Identified	9785	5.6	b2b3b4b5b6b7b8b10*b11b11b15y2y4y5y6y9y9y11y12y13y14y15	471456	1992	19140466729043	15140466729043	0.2151	Green	45527	20921519	20921496	480499	27483	27483.00	2.19	2	10465796
NCDO2118_RS07180	lactate dehydrogenase 1498372:1499349 reverse MW:35050	Regular	28456150	0	351077616	69	13	20	64.00	127790	93203	29784	0	3	Pass1	PepFrag1	None	18879083	TQGDAEDLSHALAFTSPK	TQGDAEDLSHALAFTSPK	43	18	4.30	1871	8	8	2	0	12665600	65568	Identified	3056	3.7	b1b2b3b15b18y2y8y10y14y17y18	253672	1712	173019668035187	753464453567915	0.0729	Green	8478	18879095	18879126	252288	9320	9320.00	2.80	3	6299747
NCDO2118_RS07180	lactate dehydrogenase 1498372:1499349 reverse MW:35050	Regular	28456150	0	351077616	69	13	20	64.00	127790	93203	29784	0	4	Pass1	PepFrag1	None	30264589	IYSADYSDASDADLVVLTSGAPQKPGETR	IYSADYSDASDADLVVLTSGAPQKPGETR	62	29	3.77	1872	7	7	1	1	9997127	64541	Missing	2000	4.0	b5b6y10y11y14y20y23y29	288205	2756	237654354578874	118436236385916	0.0566	Green	10705	30264684	30264620	266785	7237	7237.00	3.00	3	10094943
NCDO2118_RS07180	lactate dehydrogenase 1498372:1499349 reverse MW:35050	Regular	28456150	0	351077616	69	13	20	64.00	127790	93203	29784	0	5	Pass1	PepFrag1	None	9775302	AIIDEAFAK	AIIDEAFAK	307	9	4.07	1870	2	2	0	0	4543639	61116		503	2.0	b6y5y7y8	242453	919	11427993248041	742799324804103	0.0269	Green	4049	9775342	9775365	219893	3443	3443.00	2.00	2	4892707
NCDO2118_RS07180	lactate dehydrogenase 1498372:1499349 reverse MW:35050	Regular	28456150	0	351077616	69	13	20	64.00	127790	93203	29784	0	6	Pass2	PepFrag2	None	6823559	FSGFPK	FSGFPK	134	6	10.10	1882	4	4	0	0	2987916	59295	Identified	534	1.1	b2b4y3y6	116921	616	875279537689346	135055907537869	0.0078	Yellow	7488	6823836	6823855	245226	1003	1003.00	1.00	1	6823836
NCDO2118_RS07180	lactate dehydrogenase 1498372:1499349 reverse MW:35050	Regular	28456150	0	351077616	69	13	20	64.00	127790	93203	29784	0	7	Pass2	MissedCleavage	None	16379374	GATFYGVAVALARITK	GATFYGVAVALARITK	229	16	10.40	1877	3	3	0	0	5086653	61606		1443	3.0	b5b8y16	291262	1567	163106886810697	123106886810697	0.0450	Green	17449	16379163	16379168	298894	5755	5755.00	2.05	2	8194618
NCDO2118_RS07180	lactate dehydrogenase 1498372:1499349 reverse MW:35050	Regular	28456150	0	351077616	69	13	20	64.00	127790	93203	29784	0	8	Pass2	MissedCleavage	None	18929786	MEASGAQLKAIIDEAFAK	MEASGAQLKAIIDEAFAK	298	18	4.44	1878	3	3	0	1	10428570	64724		406	2.7	b11b15y6y7y13*	296386	1780	17757137968626	13757137968626	0.0322	Green	20331	18929903	18929893	311122	4121	4121.00	2.00	2	9469988
NCDO2118_RS07180	lactate dehydrogenase 1498372:1499349 reverse MW:35050	Regular	28456150	0	351077616	69	13	20	64.00	127790	93203	29784	0	9	Pass2	MissedCleavage	None	21450459	EKTQGDAEDLSHALAFTSPK	EKTQGDAEDLSHALAFTSPK	41	20	4.54	1875	2	2	0	0	10537720	64769	Identified	1140	2.2	b5b7b10b15*b18*b19y1y20y20*	287496	1956	189091584549835	149091584549835	0.0164	Green	14506	21450529	21450501	285830	2101	2101.00	2.25	2	10730301
NCDO2118_RS07180	lactate dehydrogenase 1498372:1499349 reverse MW:35050	Regular	28456150	0	351077616	69	13	20	64.00	127790	93203	29784	0	10	Pass2	MissedCleavage	None	35677074	VDVDARSIHAYIMGEHGDSEFAVWSHANVAGVK	VDVDARSIHAYIMGEHGDSEFAVWSHANVAGVK	162	33	5.15	1876	4	4	1	0	9587813	64359		891	2.4	b6b16b29*b32*b32y10y15y16y19*y29	326460	3258	265701305026364	928506525131821	0.0119	Green	25283	35677046	35677020	332850	1525	1525.00	3.54	4	8926816
NCDO2118_RS07180	lactate dehydrogenase 1498372:1499349 reverse MW:35050	Regular	28456150	0	351077616	69	13	20	64.00	127790	93203	29784	0	11	Pass2	VarMod	Carbamidomethyl C(25);Oxidation M(51)	56907782	AILDDEHAVLPVSVFQDGQYGVSDCYLGQPAVVGAEGVVNPIHIPLNDAEMQK	AILDDEHAVLPVSVFQDGQYGVSDCYLGQPAVVGAEGVVNPIHIPLNDAEMQK	245	53	3.78	1880	3	3	1	0	1627947	56658	Missing	869	4.9	b8y15b19*y16y31*	361069	5217	36366948260286	14183474130143	0.0529	Yellow	36832	56908146	56907952	387718	6756	6756.00	4.00	4	14234591
NCDO2118_RS07180	lactate dehydrogenase 1498372:1499349 reverse MW:35050	Regular	28456150	0	351077616	69	13	20	64.00	127790	93203	29784	0	12	Pass2	VarMod	Phosphoryl STY(10)	15457421	VVGSGTSLDTARFR	VVGSGTSLDTARFR	142	14	10.89	1881	5	5	0	1	2712913	58876		2315	1.8	b3b5b10b11-H3PO4y7y8-H3PO4y9y9-H3PO4y12-H3PO4y14	163179	1351	147750808783731	107750808783731	0.0125	Yellow	12472	15457489	15457498	275619	1599	1599.00	2.35	2	7733781
NCDO2118_RS07180	lactate dehydrogenase 1498372:1499349 reverse MW:35050	Regular	28456150	0	351077616	69	13	20	64.00	127790	93203	29784	0	13	Pass2	VarMod	Phosphoryl STY(*);Phosphoryl STY(*)	31863915	IYSADYSDASDADLVVLTSGAPQKPGETR	IYSADYSDASDADLVVLTSGAPQKPGETR	62	29	3.77	1879	1	1	0	0	6042451	62354	Identified	537	2.0	b24y8y12y26*	288205	2756	237654354578874	197654354578874	0.0082	Green	28491	31864018	31863872	347274	1047	1047.00	2.00	2	15937046
NCDO2118_RS07180	lactate dehydrogenase 1498372:1499349 reverse MW:35050	Regular	16628440	0	351077616	58	8	20	36.92	215284	128951	60025	1	1	Pass1	PepFrag1	None	6823559	FSGFPK	FSGFPK	134	6	10.10	742	9	9	7	3	53573320	69498	Identified	30504	4.0	b2b3b3b4b4y1y2y3y4y5y6	137229	616	875279537689346	135055907537869	0.4662	Green	2834	6823559	6823571	182717	100371	100371.00	1.00	1	6823559
NCDO2118_RS07180	lactate dehydrogenase 1498372:1499349 reverse MW:35050	Regular	16628440	0	351077616	58	8	20	36.92	215284	128951	60025	0	2	Pass1	PepFrag1	None	7214243	IVASGFK	IVASGFK	108	7	10.10	741	11	11	7	3	446811300	78710		7199	3.6	b2b3b5b5b7y1y2y3y4y4y5y5y6y7	159059	687	941305924769588	148261184953918	0.1034	Green	1451	7214246	7214258	150719	22261	22261.00	1.00	1	7214246
NCDO2118_RS07180	lactate dehydrogenase 1498372:1499349 reverse MW:35050	Regular	16628440	0	351077616	58	8	20	36.92	215284	128951	60025	0	3	Pass1	PepFrag1	None	11626062	VVGSGTSLDTAR	VVGSGTSLDTAR	142	12	7.00	737	9	9	5	2	108895700	72579		2268	2.8	b2b4y4y5y6y8y9y10y11	161603	1068	126320490295024	863204902950241	0.0294	Green	1286	11626063	11626084	141089	6319	6319.00	2.00	2	5818068
NCDO2118_RS07180	lactate dehydrogenase 1498372:1499349 reverse MW:35050	Regular	16628440	0	351077616	58	8	20	36.92	215284	128951	60025	0	4	Pass1	PepFrag1	None	30264589	IYSADYSDASDADLVVLTSGAPQKPGETR	IYSADYSDASDADLVVLTSGAPQKPGETR	62	29	3.77	740	8	8	2	1	13508640	63515	Identified	2108	3.4	b2b29y5y23y25y26y27y29	266145	2756	237654354578874	118436236385916	0.0217	Green	9979	30264573	30264484	272191	4676	4676.00	3.00	3	10094906
NCDO2118_RS07180	lactate dehydrogenase 1498372:1499349 reverse MW:35050	Regular	16628440	0	351077616	58	8	20	36.92	215284	128951	60025	0	5	Pass1	PepFrag1	None	9775302	AIIDEAFAK	AIIDEAFAK	307	9	4.07	738	2	2	0	0	24160770	66040		467	1.8	y5y7	234328	919	11427993248041	742799324804103	0.0120	Green	6229	9775264	9775290	228184	2591	2591.00	2.00	2	4892669
NCDO2118_RS07180	lactate dehydrogenase 1498372:1499349 reverse MW:35050	Regular	16628440	0	351077616	58	8	20	36.92	215284	128951	60025	0	6	Pass1	PepFrag1	None	18879083	TQGDAEDLSHALAFTSPK	TQGDAEDLSHALAFTSPK	43	18	4.30	739	1	1	0	0	2176506	55586	Missing	209	1.5	y7y16	254950	1712	173019668035187	753464453567915	0.0039	Yellow	9891	18879006	18879023	271204	834	834.00	3.00	3	6299717
NCDO2118_RS07180	lactate dehydrogenase 1498372:1499349 reverse MW:35050	Regular	16628440	0	351077616	58	8	20	36.92	215284	128951	60025	0	7	Pass2	MissedCleavage	None	13147012	QALAEKVDVDAR	QALAEKVDVDAR	156	12	4.31	743	2	2	1	0	5601960	59692		199	2.2	b7*y11y12	183360	1223	13826447392269	982644739226901	0.0166	Green	3031	13146910	13146925	185423	3581	3581.00	2.00	2	6578491
NCDO2118_RS07180	lactate dehydrogenase 1498372:1499349 reverse MW:35050	Regular	16628440	0	351077616	58	8	20	36.92	215284	128951	60025	0	8	Pass2	MissedCleavage	None	35677074	VDVDARSIHAYIMGEHGDSEFAVWSHANVAGVK	VDVDARSIHAYIMGEHGDSEFAVWSHANVAGVK	162	33	5.15	744	0	0	0	0	9608559	62035		53	1.9	y10*	321421	3258	265701305026364	928506525131821	0.0038	Green	15279	35677304	35677304	352955	817	817.00	4.00	4	8926881
NCDO2118_RS07180	lactate dehydrogenase 1498372:1499349 reverse MW:35050	Regular	16628440	0	351077616	58	8	20	36.92	215284	128951	60025	0	9	Pass2	InSource	None	5352875	SGFPK	FSGFPK	135	5	10.10	742	8	8	6	2	104407100	0.0000	Identified	14006	0.0	b3b3b4b5y1y2y3y4y5	137229	481	7422035349121	10844070698242	0.2506	Green	2835	5352849	5352861	182725	53957	53957.00	1.00	1	5352849
NCDO2118_RS07180	lactate dehydrogenase 1498372:1499349 reverse MW:35050	Regular	16628440	0	351077616	58	8	20	36.92	215284	128951	60025	0	10	Pass2	InSource	None	5092718	ASGFK	IVASGFK	110	5	10.10	741	7	7	4	1	269323700	0.0000		2433	0.0	b3b3b5y1y2y3y4y5	159059	458	718350865789055	103670173157811	0.0749	Green	1449	5092706	5092719	150708	16118	16118.00	1.00	1	5092706
NCDO2118_RS07180	lactate dehydrogenase 1498372:1499349 reverse MW:35050	Regular	16628440	0	351077616	58	8	20	36.92	215284	128951	60025	0	11	Pass2	InSource	None	4482554	GFPK	FSGFPK	136	4	10.10	742	1	1	0	0	80980	0.0000	Identified	579	0.0	y2	137229	408	665068547459113	930137094918227	0.0175	Green	2833	4482536	4482548	182709	3759	3759.00	1.00	1	4482536
NCDO2118_RS07180	lactate dehydrogenase 1498372:1499349 reverse MW:35050	Regular	19337640	0	351077616	51	7	20	42.15	67810	50056	32260	1	1	Pass1	PepFrag1	None	20921477	GIFLVAANPVDILTYATWK	GIFLVAANPVDILTYATWK	115	19	6.78	2015	16	16	10	4	259330200	77003	Identified	15094	6.0	b3b5b7b8b11*b15b17*y3y4y5y6y9y10y11y11y12y13y14y15y16y19y19*	479005	1992	19140466729043	15140466729043	0.4872	Green	44412	20921520	20921511	480425	33039	33039.00	2.16	2	10465797
NCDO2118_RS07180	lactate dehydrogenase 1498372:1499349 reverse MW:35050	Regular	19337640	0	351077616	51	7	20	42.15	67810	50056	32260	0	2	Pass1	PepFrag1	Carbamidomethyl C(25)	56747833	AILDDEHAVLPVSVFQDGQYGVSDCYLGQPAVVGAEGVVNPIHIPLNDAEMQK	AILDDEHAVLPVSVFQDGQYGVSDCYLGQPAVVGAEGVVNPIHIPLNDAEMQK	245	53	3.78	2014	11	11	0	1	9462022	62624	Identified	9062	5.4	b6b12b12b15b17*b29b44*y4*y5y7y8*y9y9*y11y12y13y14y14*y18y24y26y28y53	353952	5217	36366948260286	14183474130143	0.1314	Green	36350	56747906	56747591	392772	8908	8908.00	4.40	4	14194531
NCDO2118_RS07180	lactate dehydrogenase 1498372:1499349 reverse MW:35050	Regular	19337640	0	351077616	51	7	20	42.15	67810	50056	32260	0	3	Pass1	PepFrag1	None	18879083	TQGDAEDLSHALAFTSPK	TQGDAEDLSHALAFTSPK	43	18	4.30	2012	3	3	1	1	16695040	65090	Missing	1844	3.5	b2b5y9y15y16y17*	256859	1712	173019668035187	753464453567915	0.1196	Green	8250	18879034	18879071	252991	8109	8109.00	2.96	3	6299726
NCDO2118_RS07180	lactate dehydrogenase 1498372:1499349 reverse MW:35050	Regular	19337640	0	351077616	51	7	20	42.15	67810	50056	32260	0	4	Pass1	PepFrag1	None	30264589	IYSADYSDASDADLVVLTSGAPQKPGETR	IYSADYSDASDADLVVLTSGAPQKPGETR	62	29	3.77	2013	8	8	1	1	13830020	64272	Missing	1531	3.6	b2b5b27y14y24y26y28y29	287906	2756	237654354578874	118436236385916	0.0818	Green	10288	30264618	30264576	267039	5550	5550.00	3.00	3	10094921
NCDO2118_RS07180	lactate dehydrogenase 1498372:1499349 reverse MW:35050	Regular	19337640	0	351077616	51	7	20	42.15	67810	50056	32260	0	5	Pass1	PepFrag1	None	9775302	AIIDEAFAK	AIIDEAFAK	307	9	4.07	2011	5	5	2	0	17154450	65208		1132	1.5	b5y3y6y7y8	242788	919	11427993248041	742799324804103	0.0234	Green	3985	9775328	9775355	219086	1587	1587.00	2.00	2	4892700
NCDO2118_RS07180	lactate dehydrogenase 1498372:1499349 reverse MW:35050	Regular	19337640	0	351077616	51	7	20	42.15	67810	50056	32260	0	6	Pass2	MissedCleavage	None	18929786	MEASGAQLKAIIDEAFAK	MEASGAQLKAIIDEAFAK	298	18	4.44	2016	4	4	1	0	14390640	64445		1552	3.6	b9b11b12b14*b15	323818	1780	17757137968626	13757137968626	0.1269	Green	19287	18929854	18929856	311959	8604	8604.00	2.00	2	9469963
NCDO2118_RS07180	lactate dehydrogenase 1498372:1499349 reverse MW:35050	Regular	19337640	0	351077616	51	7	20	42.15	67810	50056	32260	0	7	Pass2	VarMod	Phosphoryl STY(19)	31064252	IYSADYSDASDADLVVLTSGAPQKPGETR	IYSADYSDASDADLVVLTSGAPQKPGETR	62	29	3.77	2017	4	4	0	0	1504464	54638	Missing	2045	2.5	b14b18y2y3y13-H3PO4y18*y20	287906	2756	237654354578874	788271772894371	0.0297	Red	18125	31064174	31064151	307076	2013	2013.00	4.00	4	7773598
NCDO2118_RS07180	lactate dehydrogenase 1498372:1499349 reverse MW:35050	Regular	4678187	0.76	351077616	33	7	20	25.54	44079	23233	9751	1	1	Pass1	PepFrag1	None	6823559	FSGFPK	FSGFPK	134	6	10.10	636	9	9	7	3	48077080	63520	Identified	4107	3.0	b2b2b3b3b4y1y2y3y4y5y6	127021	616	875279537689346	135055907537869	0.3456	Green	2154	6823562	6823574	182653	15234	15234.00	1.00	1	6823562
NCDO2118_RS07180	lactate dehydrogenase 1498372:1499349 reverse MW:35050	Regular	4678187	0.76	351077616	33	7	20	25.54	44079	23233	9751	0	2	Pass1	PepFrag1	None	18389535	AIIDEAFAKEEFASAVK	AIIDEAFAKEEFASAVK	307	17	4.16	637	0	0	0	0	2231539	50187		46	2.8	y16	315142	1719	173490974042038	133490974042038	0.1104	Yellow	8908	18389609	18389596	304983	4865	4865.00	2.00	2	9199841
NCDO2118_RS07180	lactate dehydrogenase 1498372:1499349 reverse MW:35050	Regular	4678187	0.76	351077616	33	7	20	25.54	44079	23233	9751	0	3	Pass1	PepFrag1	None	7214243	IVASGFK	IVASGFK	108	7	10.10	635	5	5	4	0	119019300	67457		814	1.8	y3y4y5y6y7	157297	687	941305924769588	148261184953918	0.0711	Green	1389	7214243	7214254	150707	3134	3134.00	1.00	1	7214243
NCDO2118_RS07180	lactate dehydrogenase 1498372:1499349 reverse MW:35050	Regular	4678187	0.76	351077616	33	7	20	25.54	44079	23233	9751	0	4	Pass1	PepFrag1	None	11626062	VVGSGTSLDTAR	VVGSGTSLDTAR	142	12	7.00	633	3	3	0	0	22623730	60246		663	1.9	y6y8y10	158528	1068	126320490295024	863204902950241	0.0504	Green	1279	11626087	11626110	141233	2221	2221.00	2.00	2	5818080
NCDO2118_RS07180	lactate dehydrogenase 1498372:1499349 reverse MW:35050	Regular	4678187	0.76	351077616	33	7	20	25.54	44079	23233	9751	0	5	Pass1	PepFrag1	None	30264589	IYSADYSDASDADLVVLTSGAPQKPGETR	IYSADYSDASDADLVVLTSGAPQKPGETR	62	29	3.77	634	1	1	0	0	3082491	51590	Missing	189	2.2	y23	280459	2756	237654354578874	118436236385916	0.0332	Yellow	7188	30264649	30264555	272139	1464	1464.00	3.00	3	10094931
NCDO2118_RS07180	lactate dehydrogenase 1498372:1499349 reverse MW:35050	Regular	4678187	0.76	351077616	33	7	20	25.54	44079	23233	9751	0	6	Pass2	MissedCleavage	None	13147012	QALAEKVDVDAR	QALAEKVDVDAR	156	12	4.31	638	0	0	0	0	3183556	51730		203	1.4	b6*b7*y5y8	183276	1223	13826447392269	982644739226901	0.0211	Yellow	3899	13146992	13147011	223299	932	932.00	2.00	2	6578533
NCDO2118_RS07180	lactate dehydrogenase 1498372:1499349 reverse MW:35050	Regular	4678187	0.76	351077616	33	7	20	25.54	44079	23233	9751	0	7	Pass2	VarMod	Phosphoryl STY(*);Phosphoryl STY(*)	38837926	IYSADYSDASDADLVVLTSGAPQKPGETRLDLVEK	IYSADYSDASDADLVVLTSGAPQKPGETRLDLVEK	62	35	3.85	639	1	1	0	0	597589	44465	Identified	348	2.5	y10y11y15y16y19*y30-H3PO4	325903	3444	275720080137189	978600400685946	0.0378	Red	10071	38838151	38838151	328967	1665	1665.00	3.89	4	9717092
NCDO2118_RS07180	lactate dehydrogenase 1498372:1499349 reverse MW:35050	Regular	4678187	0.76	351077616	33	7	20	25.54	44079	23233	9751	0	8	Pass2	InSource	None	5352875	SGFPK	FSGFPK	135	5	10.10	636	5	5	2	1	17150540	0.0000	Identified	2399	0.0	b3y1y2y3y5	127021	481	7422035349121	10844070698242	0.2312	Green	2156	5352876	5352889	182690	10190	10190.00	1.00	1	5352876
NCDO2118_RS07180	lactate dehydrogenase 1498372:1499349 reverse MW:35050	Regular	4678187	0.76	351077616	33	7	20	25.54	44079	23233	9751	0	9	Pass2	InSource	None	6083402	VASGFK	IVASGFK	109	6	10.10	635	4	4	2	0	57426640	0.0000		526	0.0	y2y4y5y6	157297	563	824325176210551	12486503524211	0.0505	Green	1387	6083402	6083414	150684	2228	2228.00	1.00	1	6083402
NCDO2118_RS07180	lactate dehydrogenase 1498372:1499349 reverse MW:35050	Regular	4678187	0.76	351077616	33	7	20	25.54	44079	23233	9751	0	10	Pass2	InSource	None	5092718	ASGFK	IVASGFK	110	5	10.10	635	5	5	4	0	144809600	0.0000		456	0.0	b3y1y2y3y4y5	157297	458	718350865789055	103670173157811	0.0487	Green	1390	5092705	5092718	150714	2146	2146.00	1.00	1	5092705
NCDO2118_RS07180	lactate dehydrogenase 1498372:1499349 reverse MW:35050	Regular	6418285	1.05	351077616	19	4	20	12.92	31689	22732	8750	1	1	Pass1	PepFrag1	None	11626062	VVGSGTSLDTAR	VVGSGTSLDTAR	142	12	7.00	2118	12	12	8	2	135323600	69388		6141	3.9	b2b3b12y3y4y6y7y8y8y9y10y10y11y12	159526	1068	126320490295024	863204902950241	0.5273	Green	1783	11626076	11626098	141699	16709	16709.00	2.00	2	5818074
NCDO2118_RS07180	lactate dehydrogenase 1498372:1499349 reverse MW:35050	Regular	6418285	1.05	351077616	19	4	20	12.92	31689	22732	8750	0	2	Pass1	PepFrag1	None	9775302	AIIDEAFAK	AIIDEAFAK	307	9	4.07	2120	2	2	0	1	38549820	63934		574	2.1	b2y5y6y7	229669	919	11427993248041	742799324804103	0.1219	Green	11372	9775300	9775326	227027	3862	3862.00	2.00	2	4892686
NCDO2118_RS07180	lactate dehydrogenase 1498372:1499349 reverse MW:35050	Regular	6418285	1.05	351077616	19	4	20	12.92	31689	22732	8750	0	3	Pass2	PepFrag2	None	9344662	MEASGAQLK	MEASGAQLK	298	9	7.00	2119	4	4	2	1	12790160	59143		342	1.7	b2y6y7y8	139295	861	109419586314633	694195863146326	0.0682	Green	1205	9344723	9344751	123219	2161	2161.00	2.00	2	4677398
NCDO2118_RS07180	lactate dehydrogenase 1498372:1499349 reverse MW:35050	Regular	6418285	1.05	351077616	19	4	20	12.92	31689	22732	8750	0	4	Pass2	MissedCleavage	None	13147012	QALAEKVDVDAR	QALAEKVDVDAR	156	12	4.31	2121	1	1	0	0	3013665	52865		1693	3.1	b7*y12	174062	1223	13826447392269	982644739226901	0.2827	Yellow	5094	13146872	13146888	178544	8957	8957.00	2.00	2	6578472
NCDO2118_RS07180	lactate dehydrogenase 1498372:1499349 reverse MW:35050	Regular	1964985	1.1	351077616	15	4	20	9.23	11547	9025	3304	1	1	Pass1	PepFrag1	None	11626062	VVGSGTSLDTAR	VVGSGTSLDTAR	142	12	7.00	2204	6	6	3	1	21861900	56330		2122	2.7	b2y4y7y8y9y10y10	162401	1068	126320490295024	863204902950241	0.5109	Green	1534	11626046	11626069	141785	5899	5899.00	2.00	2	5818059
NCDO2118_RS07180	lactate dehydrogenase 1498372:1499349 reverse MW:35050	Regular	1964985	1.1	351077616	15	4	20	9.23	11547	9025	3304	0	2	Pass1	PepFrag1	None	9775302	AIIDEAFAK	AIIDEAFAK	307	9	4.07	2205	4	4	1	0	35670410	58457		701	1.7	b5y3y6y7	229327	919	11427993248041	742799324804103	0.2043	Green	8027	9775263	9775292	228250	2359	2359.00	2.00	2	4892668
NCDO2118_RS07180	lactate dehydrogenase 1498372:1499349 reverse MW:35050	Regular	1964985	1.1	351077616	15	4	20	9.23	11547	9025	3304	0	3	Pass1	PepFrag1	None	9344662	MEASGAQLK	MEASGAQLK	298	9	7.00	2203	1	1	0	0	5731602	50516		98	1.2	y7	129457	861	109419586314633	694195863146326	0.0664	Yellow	1161	9344658	9344688	122989	767	767.00	2.00	2	4677366
NCDO2118_RS07180	lactate dehydrogenase 1498372:1499349 reverse MW:35050	Regular	1964985	1.1	351077616	15	4	20	9.23	11547	9025	3304	0	4	Pass2	PepFrag2	None	6823559	FSGFPK	FSGFPK	134	6	10.10	2206	1	1	0	0	609879	40786	Missing	54	1.2	b3	150510	616	875279537689346	135055907537869	0.1167	Red	5525	6823254	6823266	201490	1347	1347.00	1.00	1	6823254
NCDO2118_RS07180	lactate dehydrogenase 1498372:1499349 reverse MW:35050	Regular	1964985	1.1	351077616	15	4	20	9.23	11547	9025	3304	0	5	Pass2	InSource	None	7934090	IDEAFAK	AIIDEAFAK	309	7	4.07	2205	3	3	1	0	4707484	0.0000		329	0.0	b3b4y7	229327	728	978394239574307	155678847914861	0.1018	Green	8022	7934066	7934076	228198	1175	1175.00	1.00	1	7934066
NCDO2118_RS07180	lactate dehydrogenase 1498372:1499349 reverse MW:35050	Regular	2547203	1.94	351077616	20	6	20	10.77	38206	22450	6384	1	1	Pass1	PepFrag1	None	9344662	MEASGAQLK	MEASGAQLK	298	9	7.00	2661	5	5	3	1	38832020	59953		2199	3.0	b2y5y6y7y7*y8	141220	861	109419586314633	694195863146326	0.2892	Green	1459	9344674	9344695	123300	11050	11050.00	2.00	2	4677374
NCDO2118_RS07180	lactate dehydrogenase 1498372:1499349 reverse MW:35050	Regular	2547203	1.94	351077616	20	6	20	10.77	38206	22450	6384	0	2	Pass1	PepFrag1	None	7164189	LDLVEK	LDLVEK	91	6	4.07	2664	6	6	2	2	49214600	60982		1745	2.2	b2b3b4y2y2y4y6	167165	688	942219149137295	148443829827459	0.1763	Green	5263	7164203	7164223	168212	6736	6736.00	1.00	1	7164203
NCDO2118_RS07180	lactate dehydrogenase 1498372:1499349 reverse MW:35050	Regular	2547203	1.94	351077616	20	6	20	10.77	38206	22450	6384	0	3	Pass1	PepFrag1	None	11626062	VVGSGTSLDTAR	VVGSGTSLDTAR	142	12	7.00	2662	4	4	0	1	11592600	54702		1641	2.5	b2y3y8y10y10	162100	1068	126320490295024	863204902950241	0.1221	Yellow	2449	11626017	11626035	141267	4664	4664.00	2.00	2	5818045
NCDO2118_RS07180	lactate dehydrogenase 1498372:1499349 reverse MW:35050	Regular	2547203	1.94	351077616	20	6	20	10.77	38206	22450	6384	0	4	Pass1	PepFrag1	None	8804411	EEFASAVK	EEFASAVK	316	8	4.26	2663	2	2	0	0	2251784	47586		119	1.3	y1y5	154728	800	104188461609942	168376923219884	0.0302	Red	3085	8804333	8804351	148999	1153	1153.00	1.48	1	8804333
NCDO2118_RS07180	lactate dehydrogenase 1498372:1499349 reverse MW:35050	Regular	2547203	1.94	351077616	20	6	20	10.77	38206	22450	6384	0	5	Pass2	PepFrag2	None	6823559	FSGFPK	FSGFPK	134	6	10.10	2666	1	1	0	0	4323289	50419	Missing	327	1.3	y5y6	152289	616	875279537689346	135055907537869	0.0436	Red	2610	6823368	6823388	142754	1667	1667.00	1.00	1	6823368
NCDO2118_RS07180	lactate dehydrogenase 1498372:1499349 reverse MW:35050	Regular	2547203	1.94	351077616	20	6	20	10.77	38206	22450	6384	0	6	Pass2	VarMod	Phosphoryl STY(10)	15457421	VVGSGTSLDTARFR	VVGSGTSLDTARFR	142	14	10.89	2665	1	1	0	0	901669	43611		90	3.6	y6y11-H3PO4	211717	1351	147750808783731	107750808783731	0.2948	Red	20129	15457469	15457476	307432	11265	11265.00	2.00	2	7733771
NCDO2118_RS07180	lactate dehydrogenase 1498372:1499349 reverse MW:35050	Regular	2547203	1.94	351077616	20	6	20	10.77	38206	22450	6384	0	7	Pass2	InSource	None	6743832	ASGAQLK	MEASGAQLK	300	7	10.10	2661	1	1	0	0	904689	0.0000		263	0.0	y7	141220	628	886610213656442	137322042731288	0.0437	Green	1461	6743789	6743808	123357	1671	1671.00	1.00	1	6743789
NCDO2118_RS07180	lactate dehydrogenase 1498372:1499349 reverse MW:35050	Regular	2308241	2.25	351077616	15	4	20	6.46	55348	11320.5	3559	1	1	Pass1	PepFrag1	None	11626062	VVGSGTSLDTAR	VVGSGTSLDTAR	142	12	7.00	2122	7	7	4	1	45753020	60237		1524	2.7	b2b12y7y8y9y10y11	164155	1068	126320490295024	863204902950241	0.1057	Green	1566	11626008	11626028	141472	5848	5848.00	2.00	2	5818040
NCDO2118_RS07180	lactate dehydrogenase 1498372:1499349 reverse MW:35050	Regular	2308241	2.25	351077616	15	4	20	6.46	55348	11320.5	3559	0	2	Pass1	PepFrag1	None	9775302	AIIDEAFAK	AIIDEAFAK	307	9	4.07	2123	2	2	0	0	22349120	57125		655	1.5	y7y9	225739	919	11427993248041	742799324804103	0.0307	Green	9269	9775197	9775220	226873	1699	1699.00	1.74	2	4892635
NCDO2118_RS07180	lactate dehydrogenase 1498372:1499349 reverse MW:35050	Regular	2308241	2.25	351077616	15	4	20	6.46	55348	11320.5	3559	0	3	Pass2	MissedCleavage	None	13147012	QALAEKVDVDAR	QALAEKVDVDAR	156	12	4.31	2124	1	1	0	0	1415173	45141		731	5.6	b10*b11b12y3	187077	1223	13826447392269	982644739226901	0.8020	Red	8989	13147035	13147050	224542	44387	44387.00	2.00	2	6578554
NCDO2118_RS07180	lactate dehydrogenase 1498372:1499349 reverse MW:35050	Regular	2308241	2.25	351077616	15	4	20	6.46	55348	11320.5	3559	0	4	Pass2	VarMod	Phosphoryl STY(9)	13436970	DVVTKIVASGFK	DVVTKIVASGFK	103	12	9.88	2125	3	3	0	0	2549064	47697		435	1.9	b3b7b12	227881	1216	1377363861906	977363861906001	0.0421	Red	7747	13437037	13437051	213534	2329	2329.00	2.00	2	6723555
NCDO2118_RS07180	lactate dehydrogenase 1498372:1499349 reverse MW:35050	Regular	2308241	2.25	351077616	15	4	20	6.46	55348	11320.5	3559	0	5	Pass2	InSource	None	7934090	IDEAFAK	AIIDEAFAK	309	7	4.07	2123	2	2	0	0	1741299	0.0000		214	0.0	y5y7	225739	728	978394239574307	155678847914861	0.0196	Green	9257	7934097	7934110	226700	1085	1085.00	1.00	1	7934097
NCDO2118_RS07180	lactate dehydrogenase 1498372:1499349 reverse MW:35050	Regular	1347373	2.41	351077616	6	3	20	12.31	8420	8420	1442	1	1	Pass1	PepFrag1	None	11626062	VVGSGTSLDTAR	VVGSGTSLDTAR	142	12	7.00	2078	2	2	0	0	14815460	53002		978	2.4	y8y10	155322	1068	126320490295024	863204902950241	0.4876	Yellow	1458	11626030	11626053	142186	4106	4106.00	2.00	2	5818051
NCDO2118_RS07180	lactate dehydrogenase 1498372:1499349 reverse MW:35050	Regular	1347373	2.41	351077616	6	3	20	12.31	8420	8420	1442	0	2	Pass1	PepFrag1	None	20160033	TQGDAEDLSHALAFTSPKK	TQGDAEDLSHALAFTSPKK	43	19	5.28	2080	1	1	0	0	3086262	46189	Missing	83	2.5	b9y11	233689	1847	18199979458679	813331963911935	0.3643	Red	8270	20159993	20159997	245521	3067	3067.00	3.37	3	6726713
NCDO2118_RS07180	lactate dehydrogenase 1498372:1499349 reverse MW:35050	Regular	1347373	2.41	351077616	6	3	20	12.31	8420	8420	1442	0	3	Pass1	PepFrag1	None	9775302	AIIDEAFAK	AIIDEAFAK	307	9	4.07	2079	3	3	2	0	22385760	54795		381	1.4	y5y6y7	225997	919	11427993248041	742799324804103	0.1481	Yellow	7224	9775208	9775237	228603	1247	1247.00	2.00	2	4892641
NCDO2118_RS07180	lactate dehydrogenase 1498372:1499349 reverse MW:35050	Regular	1193246	3.7	351077616	13	4	20	6.46	8176	8028	2483	1	1	Pass1	PepFrag1	None	9344662	MEASGAQLK	MEASGAQLK	298	9	7.00	1857	4	4	2	1	11924380	51532		694	2.0	b2y6y7y8y8	136618	861	109419586314633	694195863146326	0.4299	Yellow	1242	9344661	9344680	124278	3515	3515.00	2.00	2	4677367
NCDO2118_RS07180	lactate dehydrogenase 1498372:1499349 reverse MW:35050	Regular	1193246	3.7	351077616	13	4	20	6.46	8176	8028	2483	0	2	Pass1	PepFrag1	None	11626062	VVGSGTSLDTAR	VVGSGTSLDTAR	142	12	7.00	1858	4	4	1	0	22102120	54212		642	1.8	b12y7y8y10	155910	1068	126320490295024	863204902950241	0.2247	Yellow	1802	11626064	11626079	141927	1837	1837.00	2.00	2	5818068
NCDO2118_RS07180	lactate dehydrogenase 1498372:1499349 reverse MW:35050	Regular	1193246	3.7	351077616	13	4	20	6.46	8176	8028	2483	0	3	Pass2	PepFrag2	None	7164189	LDLVEK	LDLVEK	91	6	4.07	1860	3	3	1	0	2543356	44821		1039	1.3	b3y5y6	172391	688	942219149137295	148443829827459	0.2116	Red	6226	7163919	7163935	207449	1730	1730.00	1.00	1	7163919
NCDO2118_RS07180	lactate dehydrogenase 1498372:1499349 reverse MW:35050	Regular	1193246	3.7	351077616	13	4	20	6.46	8176	8028	2483	0	4	Pass2	VarMod	Phosphoryl STY(1)	29923447	SIHAYIMGEHGDSEFAVWSHANVAGVK	SIHAYIMGEHGDSEFAVWSHANVAGVK	168	27	5.75	1859	2	2	0	0	1065574	41043		108	2.0	b2b10-H3PO4b11	252176	2651	231579148476011	114386098984007	0.1338	Red	11331	29923250	29923197	309551	1094	1094.00	3.00	3	9981132
NCDO2118_RS07180	lactate dehydrogenase 1498372:1499349 reverse MW:35050	Regular	1795775	3.92	351077616	10	4	20	14.77	7041	6110	1817	1	1	Pass1	PepFrag1	None	11626062	VVGSGTSLDTAR	VVGSGTSLDTAR	142	12	7.00	2038	6	6	3	1	32839710	57707		1326	2.3	b2y6y7y9y10y10y11	160849	1068	126320490295024	863204902950241	0.5567	Green	1610	11626033	11626055	141501	3920	3920.00	2.00	2	5818053
NCDO2118_RS07180	lactate dehydrogenase 1498372:1499349 reverse MW:35050	Regular	1795775	3.92	351077616	10	4	20	14.77	7041	6110	1817	0	2	Pass1	PepFrag1	None	9775302	AIIDEAFAK	AIIDEAFAK	307	9	4.07	2039	2	2	1	0	14346230	54110		413	1.4	y6y7	234332	919	11427993248041	742799324804103	0.1771	Yellow	8843	9775219	9775245	227583	1247	1247.00	2.00	2	4892646
NCDO2118_RS07180	lactate dehydrogenase 1498372:1499349 reverse MW:35050	Regular	1795775	3.92	351077616	10	4	20	14.77	7041	6110	1817	0	3	Pass1	PepFrag1	None	9344662	MEASGAQLK	MEASGAQLK	298	9	7.00	2041	1	1	0	0	4525032	49099		32	1.2	y8	123694	861	109419586314633	178839172629265	0.1339	Red	4516	9344662	9344672	184085	943	943.00	1.00	1	9344662
NCDO2118_RS07180	lactate dehydrogenase 1498372:1499349 reverse MW:35050	Regular	1795775	3.92	351077616	10	4	20	14.77	7041	6110	1817	0	4	Pass1	PepFrag1	None	18879083	TQGDAEDLSHALAFTSPK	TQGDAEDLSHALAFTSPK	43	18	4.30	2040	1	1	0	0	1094950	42936	Missing	46	1.6	y7	243412	1712	173019668035187	753464453567915	0.1322	Red	11388	18879109	18879129	259762	931	931.00	3.00	3	6299752
NCDO2118_RS07180	lactate dehydrogenase 1498372:1499349 reverse MW:35050	Regular	1632107	3.94	351077616	14	5	20	6.46	13886	8884.5	3713	1	1	Pass1	PepFrag1	None	9344662	MEASGAQLK	MEASGAQLK	298	9	7.00	2240	5	5	3	1	46620120	58813		929	2.1	b2y5y6y7y8	132154	861	109419586314633	694195863146326	0.2937	Green	1279	9344635	9344662	124122	4078	4078.00	2.00	2	4677354
NCDO2118_RS07180	lactate dehydrogenase 1498372:1499349 reverse MW:35050	Regular	1632107	3.94	351077616	14	5	20	6.46	13886	8884.5	3713	0	2	Pass1	PepFrag1	None	11626062	VVGSGTSLDTAR	VVGSGTSLDTAR	142	12	7.00	2241	2	2	0	0	8757885	51551		543	1.8	y8y10	157292	1068	126320490295024	863204902950241	0.1329	Yellow	1954	11626072	11626094	142322	1845	1845.00	2.00	2	5818073
NCDO2118_RS07180	lactate dehydrogenase 1498372:1499349 reverse MW:35050	Regular	1632107	3.94	351077616	14	5	20	6.46	13886	8884.5	3713	0	3	Pass2	PepFrag2	None	7164189	LDLVEK	LDLVEK	91	6	4.07	2244	2	2	0	0	959837	41949		1805	1.7	b3b6y6	163191	688	942219149137295	148443829827459	0.2225	Red	7177	7163929	7163947	207263	3089	3089.00	1.00	1	7163929
NCDO2118_RS07180	lactate dehydrogenase 1498372:1499349 reverse MW:35050	Regular	1632107	3.94	351077616	14	5	20	6.46	13886	8884.5	3713	0	4	Pass2	MissedCleavage	None	21450459	EKTQGDAEDLSHALAFTSPK	EKTQGDAEDLSHALAFTSPK	41	20	4.54	2242	1	1	0	0	3264070	47265	Missing	138	2.1	b12*b14y8	232269	1956	189091584549835	860610563665567	0.1270	Red	10889	21450458	21450456	252968	1763	1763.00	3.00	3	7156868
NCDO2118_RS07180	lactate dehydrogenase 1498372:1499349 reverse MW:35050	Regular	1632107	3.94	351077616	14	5	20	6.46	13886	8884.5	3713	0	5	Pass2	VarMod	Phosphoryl STY(*)	15457421	VVGSGTSLDTARFR	VVGSGTSLDTARFR	142	14	10.89	2243	4	4	1	0	3341839	47367		298	2.3	b10b12-H3PO4b13y11y11y12y12-H3PO4	210564	1351	147750808783731	107750808783731	0.2240	Red	13343	15457471	15457475	302153	3111	3111.00	2.00	2	7733772
NCDO2118_RS07185	pyruvate kinase 1499467:1500975 reverse MW:54255	Regular	8910882	0	543119936	43	8	33	28.69	227435	96989	155738	1	1	Pass1	PepFrag1	Carbamidomethyl C(2)	17088687	ICEETGNPHVQLLAK	ICEETGNPHVQLLAK	235	15	5.30	865	26	26	21	10	275819600	73905	Identified	151933	7.9	b2b3b4b5b7b7b8b9b11b11b12b12b13b14b15b15*b15y1y2y3y4y5y5*y6y7y8y9y9*y10y10*y11y11*y11y12y12*y12y13y13y14y14*y15y15*	228860	1542	161367430379895	121367430379895	0.3994	Green	4839	17088683	17088669	199569	90832	90832.00	2.26	2	8549378
NCDO2118_RS07185	pyruvate kinase 1499467:1500975 reverse MW:54255	Regular	8910882	0	543119936	43	8	33	28.69	227435	96989	155738	0	2	Pass1	PepFrag1	None	15347384	EFEVEAQNDGVIGK	EFEVEAQNDGVIGK	168	14	3.69	864	2	2	1	0	3214168	54570		115	2.3	b3b4	226147	1395	150941654454293	110941654454293	0.0137	Yellow	5480	15347408	15347410	208680	3113	3113.00	2.00	2	7678741
NCDO2118_RS07185	pyruvate kinase 1499467:1500975 reverse MW:54255	Regular	8910882	0	543119936	43	8	33	28.69	227435	96989	155738	0	3	Pass1	PepFrag1	None	18088913	TELFADGADAISVVTGDK	TELFADGADAISVVTGDK	95	18	3.50	862	5	5	0	1	9770676	59398		406	2.5	b3b5b9b14y5y11y13	291770	1666	169906358587853	129906358587853	0.0134	Green	10704	18088880	18088857	290290	3044	3044.00	2.00	2	9049476
NCDO2118_RS07185	pyruvate kinase 1499467:1500975 reverse MW:54255	Regular	8910882	0	543119936	43	8	33	28.69	227435	96989	155738	0	4	Pass1	PepFrag1	None	13106521	NAQTMLKEYGR	NAQTMLKEYGR	363	11	9.72	866	2	2	0	0	1611884	51573		842	1.8	b6b9b11	163333	1199	136449649027853	964496490278527	0.0099	Yellow	6558	13106606	13106622	221750	2254	2254.00	2.00	2	6558339
NCDO2118_RS07185	pyruvate kinase 1499467:1500975 reverse MW:54255	Regular	8910882	0	543119936	43	8	33	28.69	227435	96989	155738	0	5	Pass1	PepFrag1	None	24643770	VALASGLVESGDNIIIVAGVPVGTGR	VALASGLVESGDNIIIVAGVPVGTGR	466	26	4.07	863	3	3	0	0	3744918	55234	Missing	226	1.7	b12b14y8y10	345954	2359	214245443756502	102830295837668	0.0036	Yellow	12777	24643733	24643687	369591	815	815.00	3.00	3	8221293
NCDO2118_RS07185	pyruvate kinase 1499467:1500975 reverse MW:54255	Regular	8910882	0	543119936	43	8	33	28.69	227435	96989	155738	0	6	Pass2	MissedCleavage	None	22681475	IVVTATNMLESMTYNPRATR	IVVTATNMLESMTYNPRATR	302	20	9.84	867	2	2	0	0	1890139	52264	Missing	1630	4.1	b10b11*y7y7y12y20y20*	270729	2113	199079236075698	927194907171321	0.0503	Yellow	10018	22681289	22681267	275457	11443	11443.00	2.92	3	7567145
NCDO2118_RS07185	pyruvate kinase 1499467:1500975 reverse MW:54255	Regular	8910882	0	543119936	43	8	33	28.69	227435	96989	155738	0	7	Pass2	VarMod	Phosphoryl STY(*)	14247145	LIVALTESGNTAR	LIVALTESGNTAR	403	13	7.00	869	2	2	0	0	3602817	55066		418	8.2	y9y11y12	219106	1271	141858926121739	101858926121739	0.5057	Yellow	3564	14247045	14247055	182005	115025	115025.00	1.98	2	7128559
NCDO2118_RS07185	pyruvate kinase 1499467:1500975 reverse MW:54255	Regular	8910882	0	543119936	43	8	33	28.69	227435	96989	155738	0	8	Pass2	VarMod	Oxidation M(18)	27442567	SEISDVFNAVIDGTDATMLSGESANGK	SEISDVFNAVIDGTDATMLSGESANGK	322	27	3.43	868	1	1	0	0	1176073	50204		168	1.8	b15y8*y12	320771	2482	221629458640746	107752972427164	0.0040	Yellow	13059	27442670	27442584	388801	909	909.00	3.00	3	9154272
NCDO2118_RS07185	pyruvate kinase 1499467:1500975 reverse MW:54255	Regular	19577150	0	543119936	79	12	33	29.88	318896	287532	204986	1	1	Pass1	PepFrag1	None	26553294	IENQQGIENLDEIIEAADGIMIAR	IENQQGIENLDEIIEAADGIMIAR	250	24	3.43	632	18	18	3	3	35459740	68415		23670	12.3	b2b4b5b5b7b7*b8*b10b11b11*b13b13*b14b14*b14b16b18y1y3y7y9y10y12y14y19y22	377498	2475	221212553895603	107475035930402	0.5945	Green	14927	26553267	26553224	445757	189582	189582.00	2.80	3	8857804
NCDO2118_RS07185	pyruvate kinase 1499467:1500975 reverse MW:54255	Regular	19577150	0	543119936	79	12	33	29.88	318896	287532	204986	0	2	Pass1	PepFrag1	Carbamidomethyl C(2)	17088687	ICEETGNPHVQLLAK	ICEETGNPHVQLLAK	235	15	5.30	634	25	25	20	10	415743200	79106	Identified	175609	7.9	b2b3b4b5b5b6b7b7*b9b9b10b11b11*b11b12b12*b13b14b15b15*y2y3y4y5y5*y6y8y8*y9y9*y10y10*y11y11*y12y12*y12y13y13y14y14y15	218760	1542	161367430379895	121367430379895	0.2817	Green	3237	17088728	17088713	198246	89826	89826.00	2.29	2	8549400
NCDO2118_RS07185	pyruvate kinase 1499467:1500975 reverse MW:54255	Regular	19577150	0	543119936	79	12	33	29.88	318896	287532	204986	0	3	Pass1	PepFrag1	None	18088913	TELFADGADAISVVTGDK	TELFADGADAISVVTGDK	95	18	3.50	630	14	14	7	4	130314400	74067		2407	3.5	b2b3b4b5b10b11y4y5y7y8y10y15y16y18	309647	1666	169906358587853	129906358587853	0.0255	Green	11256	18088958	18088934	323280	8124	8124.00	2.04	2	9049515
NCDO2118_RS07185	pyruvate kinase 1499467:1500975 reverse MW:54255	Regular	19577150	0	543119936	79	12	33	29.88	318896	287532	204986	0	4	Pass1	PepFrag1	None	17399075	HRPNADILAITFDEK	HRPNADILAITFDEK	420	15	5.28	631	6	6	2	1	7173989	61475	Missing	1002	2.5	b6b7y4y5y8y15	268603	1612	166214787680525	708098584536835	0.0124	Green	12746	17399075	17399098	357656	3950	3950.00	3.00	3	5806407
NCDO2118_RS07185	pyruvate kinase 1499467:1500975 reverse MW:54255	Regular	19577150	0	543119936	79	12	33	29.88	318896	287532	204986	0	5	Pass1	PepFrag1	None	13027376	LGLSLTGKDAATR	LGLSLTGKDAATR	155	13	10.12	633	1	1	0	0	2451913	56813		85	2.4	b10y10	172554	1235	139167429587555	991674295875554	0.0123	Yellow	6077	13027339	13027352	242678	3924	3924.00	2.00	2	6518706
NCDO2118_RS07185	pyruvate kinase 1499467:1500975 reverse MW:54255	Regular	19577150	0	543119936	79	12	33	29.88	318896	287532	204986	0	6	Pass1	PepFrag1	None	11906627	STVTEVVAASVK	STVTEVVAASVK	382	12	7.00	629	5	5	2	0	15492280	64819		578	2.1	b2b3y5y7y8y9	198125	1130	131163177712208	911631777122084	0.0098	Green	4990	11906629	11906647	226551	3115	3115.00	2.00	2	5958351
NCDO2118_RS07185	pyruvate kinase 1499467:1500975 reverse MW:54255	Regular	19577150	0	543119936	79	12	33	29.88	318896	287532	204986	0	7	Pass1	PepFrag1	None	19399616	IVVTATNMLESMTYNPR	IVVTATNMLESMTYNPR	302	17	7.00	635	0	0	0	0	3668223	58562	Missing	148	1.8	b10y3*y6	271246	1805	179230165172554	794867767817027	0.0040	Green	7384	19399546	19399560	258615	1280	1280.00	3.00	3	6473231
NCDO2118_RS07185	pyruvate kinase 1499467:1500975 reverse MW:54255	Regular	19577150	0	543119936	79	12	33	29.88	318896	287532	204986	0	8	Pass2	PepFrag2	None	8054236	NAQTMLK	NAQTMLK	363	7	10.10	640	1	1	0	0	1019440	53001		39	1.3	y6	134038	753	100066709325229	600667093252291	0.0048	Yellow	1788	8054233	8054259	167307	1519	1519.00	2.00	2	4032153
NCDO2118_RS07185	pyruvate kinase 1499467:1500975 reverse MW:54255	Regular	19577150	0	543119936	79	12	33	29.88	318896	287532	204986	0	9	Pass2	MissedCleavage	None	15968479	YDKSTVTEVVAASVK	YDKSTVTEVVAASVK	379	15	6.95	637	0	0	0	0	1207308	53736		254	3.1	b8	203093	1497	158212515050309	654750100335392	0.0216	Yellow	2766	15968588	15968617	189500	6904	6904.00	3.00	3	5329578
NCDO2118_RS07185	pyruvate kinase 1499467:1500975 reverse MW:54255	Regular	19577150	0	543119936	79	12	33	29.88	318896	287532	204986	0	10	Pass2	MissedCleavage	None	21120608	TELFADGADAISVVTGDKFR	TELFADGADAISVVTGDKFR	95	20	3.97	636	3	3	0	0	4024920	58965		150	2.1	b13y5y10y14	320322	1949	188640176287049	857601175246993	0.0056	Green	11413	21120811	21120814	326138	1790	1790.00	2.87	3	7046985
NCDO2118_RS07185	pyruvate kinase 1499467:1500975 reverse MW:54255	Regular	19577150	0	543119936	79	12	33	29.88	318896	287532	204986	0	11	Pass2	VarMod	Phosphoryl STY(15)	26313330	FGLSQPGGINFIAISFVRTANDVK	FGLSQPGGINFIAISFVRTANDVK	207	24	10.12	639	2	2	0	0	1496241	54668	Missing	173	3.2	y7y15y20-H3PO4	359116	2398	216600316407505	104400210938337	0.0152	Yellow	12669	26313348	26313307	355374	4845	4845.00	3.00	3	8777831
NCDO2118_RS07185	pyruvate kinase 1499467:1500975 reverse MW:54255	Regular	19577150	0	543119936	79	12	33	29.88	318896	287532	204986	0	12	Pass2	VarMod	Oxidation M(21)	26713243	IENQQGIENLDEIIEAADGIMIAR	IENQQGIENLDEIIEAADGIMIAR	250	24	3.43	638	4	4	1	0	5815587	60563		871	2.8	b13b18y9y10y10	377498	2475	221212553895603	107475035930402	0.0102	Green	14647	26713379	26713335	429529	3240	3240.00	3.00	3	8911175
NCDO2118_RS07185	pyruvate kinase 1499467:1500975 reverse MW:54255	Regular	19577150	0	543119936	79	12	33	29.88	318896	287532	204986	0	13	Pass2	InSource	None	10465299	EAADGIMIAR	IENQQGIENLDEIIEAADGIMIAR	264	10	4.07	632	0	0	0	0	856516	0.0000		0	0.0		377498	969	118388309419006	196776618838012	0.0025	Green	14917	10465268	10465276	445400	797	797.00	1.00	1	10465268
NCDO2118_RS07185	pyruvate kinase 1499467:1500975 reverse MW:54255	Regular	154824400	0	543119936	303	26	33	63.94	1668653	929782	775307	1	1	Pass1	PepFrag1	None	24643770	VALASGLVESGDNIIIVAGVPVGTGR	VALASGLVESGDNIIIVAGVPVGTGR	466	26	4.07	187	37	37	30	14	716881600	90453	Identified	206275	16.2	b3b4b5b6b6b7b8b8b9b9b10b11b12b13b14b14b15b15*b15b16b16*b17b18b19b20b20b26y1y2y3y4y4y5y5y6y6y7y8y9y10y11y12y13y16y17y18y18*y19y22y23y26	399257	2359	214245443756502	102830295837668	0.2249	Green	25678	24643825	24643823	366101	375261	375261.00	2.69	3	8221324
NCDO2118_RS07185	pyruvate kinase 1499467:1500975 reverse MW:54255	Regular	154824400	0	543119936	303	26	33	63.94	1668653	929782	775307	0	2	Pass1	PepFrag1	None	19399616	IVVTATNMLESMTYNPR	IVVTATNMLESMTYNPR	302	17	7.00	185	28	28	23	11	1060383000	92153	Identified	122713	13.8	b2b3b4b4b5b5b6b7b7b8b8*b8b9b9b10b10*b11b11*b11b12b12b13*b14b14b15b16b17b17*y1y2y3y4y5y6y7y7y8y8*y8y9y9y10y10y11y11*y12y12y13y14y14*y15y17	311813	1805	179230165172554	139230165172554	0.2217	Green	16964	19399562	19399544	318799	369969	369969.00	2.29	2	9704817
NCDO2118_RS07185	pyruvate kinase 1499467:1500975 reverse MW:54255	Regular	154824400	0	543119936	303	26	33	63.94	1668653	929782	775307	0	3	Pass1	PepFrag1	None	8925138	VGFLLDTK	VGFLLDTK	82	8	6.78	183	11	11	8	3	629610400	89889		92620	8.0	b3b4b5b6b7b7y2y3y3y4y6y6y7y8	239030	855	108910656856658	177821313713317	0.1106	Green	6925	8925148	8925164	256032	184552	184552.00	1.00	1	8925148
NCDO2118_RS07185	pyruvate kinase 1499467:1500975 reverse MW:54255	Regular	154824400	0	543119936	303	26	33	63.94	1668653	929782	775307	0	4	Pass1	PepFrag1	None	31264832	GLMINWGVIPTMTEKPSSTDDMFEVAEK	GLMINWGVIPTMTEKPSSTDDMFEVAEK	438	28	3.92	188	17	17	10	4	172078600	84256	Identified	103420	12.2	b3b4b5b5*b6b6*b7*b9*b12b24y4y9y13y13y19y20y21y22y23y24y24y25y25*y26y28y28*	422858	2895	245579444639063	123719629759375	0.0946	Green	29366	31264869	31264806	388278	157908	157908.00	2.94	3	10428338
NCDO2118_RS07185	pyruvate kinase 1499467:1500975 reverse MW:54255	Regular	154824400	0	543119936	303	26	33	63.94	1668653	929782	775307	0	5	Pass1	PepFrag1	None	15168118	NIAALIEEGANVFR	NIAALIEEGANVFR	40	14	4.26	189	23	23	18	9	376294600	87654		54776	8.2	b2b3b3*b4b5b5*b6b6*b7b7*b7b8b8*b9b10*b10b12b14y1y2y3y4y4*y5y6y7y7y8y9y9*y9y10y11y11*y11y12y12y14	360721	1419	152667958378682	112667958378682	0.0648	Green	30867	15168148	15168156	404300	108098	108098.00	2.06	2	7589110
NCDO2118_RS07185	pyruvate kinase 1499467:1500975 reverse MW:54255	Regular	154824400	0	543119936	303	26	33	63.94	1668653	929782	775307	0	6	Pass1	PepFrag1	None	7884876	LGLSLTGK	LGLSLTGK	155	8	10.10	179	9	9	6	1	89777950	81430		26100	6.6	b5b5b6b6b7b7b8y1y4y5y6y7y7y8	160834	769	101479237201927	162958474403854	0.0621	Green	2465	7884876	7884893	209774	103617	103617.00	1.00	1	7884876
NCDO2118_RS07185	pyruvate kinase 1499467:1500975 reverse MW:54255	Regular	154824400	0	543119936	303	26	33	63.94	1668653	929782	775307	0	7	Pass1	PepFrag1	None	13447482	LIVALTESGNTAR	LIVALTESGNTAR	403	13	7.00	181	16	16	12	6	441354800	88346		60238	7.7	b2b3b4b5b6b6b7b10y2y4y4*y5y6y6*y7y7y8y8*y9y9y10y10y11y11y12*	236213	1271	141858926121739	101858926121739	0.0579	Green	3608	13447505	13447520	225123	96626	96626.00	1.97	2	6728789
NCDO2118_RS07185	pyruvate kinase 1499467:1500975 reverse MW:54255	Regular	154824400	0	543119936	303	26	33	63.94	1668653	929782	775307	0	8	Pass1	PepFrag1	None	19230487	FGLSQPGGINFIAISFVR	FGLSQPGGINFIAISFVR	207	18	11.05	190	23	23	13	9	289068800	86508	Identified	37230	6.6	b3b4b4b5b5b6b7b8b9b9*b9b10b11b12b14b15b15*b15b18y1y3y4y6y7y7y8y10y11y13y14y15y18	411254	1811	179627131410996	139627131410996	0.0279	Green	32604	19230501	19230485	424160	46542	46542.00	2.14	2	9620287
NCDO2118_RS07185	pyruvate kinase 1499467:1500975 reverse MW:54255	Regular	154824400	0	543119936	303	26	33	63.94	1668653	929782	775307	0	9	Pass1	PepFrag1	None	26553294	IENQQGIENLDEIIEAADGIMIAR	IENQQGIENLDEIIEAADGIMIAR	250	24	3.43	191	22	22	14	5	409572300	88022		8235	5.9	b2b3b4b5b6b7b8b10b12b13b13*b14b15b16b18y4y6y7y8y9y10y14y17y24	432882	2475	221212553895603	107475035930402	0.0154	Green	34330	26553323	26553305	443809	25763	25763.00	2.98	3	8857823
NCDO2118_RS07185	pyruvate kinase 1499467:1500975 reverse MW:54255	Regular	154824400	0	543119936	303	26	33	63.94	1668653	929782	775307	0	10	Pass1	PepFrag1	None	10135778	IPFPALAER	IPFPALAER	192	9	7.00	184	8	8	4	2	49762660	78867	Identified	3259	3.3	b2b4y3y5y6y7y8y9	262337	954	117163377846316	771633778463164	0.0085	Green	9346	10135825	10135847	274397	14183	14183.00	1.93	2	5072949
NCDO2118_RS07185	pyruvate kinase 1499467:1500975 reverse MW:54255	Regular	154824400	0	543119936	303	26	33	63.94	1668653	929782	775307	0	11	Pass1	PepFrag1	None	19389340	GDMGIEVPFEMVPVYQK	GDMGIEVPFEMVPVYQK	274	17	3.83	186	14	14	8	4	100962100	81940	Identified	6471	3.9	b4b5b6b7b7b13b14b15b16y3y4y5y6*y10y10*y10y12y17	391348	1797	178700191922053	138700191922053	0.0068	Green	25012	19389436	19389419	362005	11308	11308.00	2.03	2	9699755
NCDO2118_RS07185	pyruvate kinase 1499467:1500975 reverse MW:54255	Regular	154824400	0	543119936	303	26	33	63.94	1668653	929782	775307	0	12	Pass1	PepFrag1	None	33417363	STPELIALNVAGGLDIFDDVEIGQTILIDDGK	STPELIALNVAGGLDIFDDVEIGQTILIDDGK	123	32	3.23	193	7	7	0	0	44505810	78383	Missing	4021	4.4	b5b7b16y4y5y6y6y10y13y27y32	534445	3154	260016411449035	133344274299357	0.0052	Green	38102	33417395	33417306	506874	8730	8730.00	2.78	3	11145847
NCDO2118_RS07185	pyruvate kinase 1499467:1500975 reverse MW:54255	Regular	154824400	0	543119936	303	26	33	63.94	1668653	929782	775307	0	13	Pass1	PepFrag1	None	11906627	STVTEVVAASVK	STVTEVVAASVK	382	12	7.00	180	5	5	2	0	16060720	73956		478	2.4	b2b3b4y5y6y7	229181	1130	131163177712208	911631777122084	0.0027	Green	3215	11906582	11906602	220354	4446	4446.00	2.00	2	5958328
NCDO2118_RS07185	pyruvate kinase 1499467:1500975 reverse MW:54255	Regular	154824400	0	543119936	303	26	33	63.94	1668653	929782	775307	0	14	Pass1	PepFrag1	None	12547416	IVSTLGPAVEIR	IVSTLGPAVEIR	6	12	7.00	182	2	2	0	0	10038010	71915	Identified	317	2.2	b10y6y8	268520	1210	137282932554542	972829325545422	0.0020	Green	6312	12547400	12547418	250842	3263	3263.00	2.00	2	6278736
NCDO2118_RS07185	pyruvate kinase 1499467:1500975 reverse MW:54255	Regular	154824400	0	543119936	303	26	33	63.94	1668653	929782	775307	0	15	Pass1	PepFrag1	None	18088913	TELFADGADAISVVTGDK	TELFADGADAISVVTGDK	95	18	3.50	192	2	2	0	0	12855410	72989		223	2.1	b3y7y16	337683	1666	169906358587853	129906358587853	0.0011	Green	24907	18088928	18088920	361395	1917	1917.00	2.00	2	9049500
NCDO2118_RS07185	pyruvate kinase 1499467:1500975 reverse MW:54255	Regular	154824400	0	543119936	303	26	33	63.94	1668653	929782	775307	0	16	Pass1	PepFrag1	None	17399075	HRPNADILAITFDEK	HRPNADILAITFDEK	420	15	5.28	195	4	4	2	1	7490678	70644	Missing	433	1.9	b7b8y6y7y7y8y8	250576	1612	166214787680525	708098584536835	0.0010	Green	23143	17399043	17399079	351813	1705	1705.00	3.00	3	5806396
NCDO2118_RS07185	pyruvate kinase 1499467:1500975 reverse MW:54255	Regular	154824400	0	543119936	303	26	33	63.94	1668653	929782	775307	0	17	Pass2	PepFrag2	Carbamidomethyl C(2)	17088687	ICEETGNPHVQLLAK	ICEETGNPHVQLLAK	235	15	5.30	194	9	9	3	0	13269810	73127	Identified	2337	4.1	b2y1y6y8y9*y10y11y12y12*y14y15	203082	1542	161367430379895	6757828691993	0.0093	Green	1659	17088491	17088528	190342	15445	15445.00	2.94	3	5702879
NCDO2118_RS07185	pyruvate kinase 1499467:1500975 reverse MW:54255	Regular	154824400	0	543119936	303	26	33	63.94	1668653	929782	775307	0	18	Pass2	MissedCleavage	None	22881915	NAAEAMDIKLIVALTESGNTAR	NAAEAMDIKLIVALTESGNTAR	394	22	4.44	197	2	2	0	0	4522035	68452		1841	3.4	b5b7b10*b22y5y11y12*	361683	2151	201458953880691	943059692537937	0.0037	Green	28234	22881745	22881755	380026	6126	6126.00	2.65	3	7633964
NCDO2118_RS07185	pyruvate kinase 1499467:1500975 reverse MW:54255	Regular	154824400	0	543119936	303	26	33	63.94	1668653	929782	775307	0	19	Pass2	MissedCleavage	None	35106953	VERGLMINWGVIPTMTEKPSSTDDMFEVAEK	VERGLMINWGVIPTMTEKPSSTDDMFEVAEK	435	31	4.13	198	7	7	0	0	8725674	71306	Missing	14801	3.7	b3b8b10b19b22b23b25b26y3y3y12y24y25*y31	383322	3257	265646933244262	928234666221312	0.0034	Green	28197	35107101	35107025	379812	5658	5658.00	3.73	4	8784330
NCDO2118_RS07185	pyruvate kinase 1499467:1500975 reverse MW:54255	Regular	154824400	0	543119936	303	26	33	63.94	1668653	929782	775307	0	20	Pass2	MissedCleavage	None	21961151	AGKIVVTATNMLESMTYNPR	AGKIVVTATNMLESMTYNPR	299	20	9.72	196	4	4	2	0	5846486	69567	Identified	820	2.6	b13b14*b18*y8*y9y10y10*y14y15	305394	2055	195419329268253	902795528455023	0.0020	Green	20850	21961380	21961395	339357	3262	3262.00	2.46	3	7327175
NCDO2118_RS07185	pyruvate kinase 1499467:1500975 reverse MW:54255	Regular	154824400	0	543119936	303	26	33	63.94	1668653	929782	775307	0	21	Pass2	VarMod	Phosphoryl STY(11);Phosphoryl STY(52)	57317749	GLMINWGVIPTMTEKPSSTDDMFEVAEKVALASGLVESGDNIIIVAGVPVGTGR	GLMINWGVIPTMTEKPSSTDDMFEVAEKVALASGLVESGDNIIIVAGVPVGTGR	438	54	3.96	203	5	5	1	0	2089072	65098	Identified	745	7.3	b9*b10b11b13-H3PO4y11y14y14y15*y18y28*y42	392984	5254	365386933962884	106154773585153	0.0123	Green	28709	57318171	57318171	383565	20553	20553.00	4.94	5	11471692
NCDO2118_RS07185	pyruvate kinase 1499467:1500975 reverse MW:54255	Regular	154824400	0	543119936	303	26	33	63.94	1668653	929782	775307	0	22	Pass2	VarMod	Phosphoryl STY(*);Phosphoryl STY(*)	22940386	STVTEVVAASVKNAAEAMDIK	STVTEVVAASVKNAAEAMDIK	382	21	4.44	202	0	0	0	0	2345303	65600		344	3.2	b6y9b5-H3PO4y18-H3PO4	315903	2010	19255597788594	883706519239597	0.0034	Green	19102	22940417	22940426	329480	5618	5618.00	3.00	3	7653521
NCDO2118_RS07185	pyruvate kinase 1499467:1500975 reverse MW:54255	Regular	154824400	0	543119936	303	26	33	63.94	1668653	929782	775307	0	23	Pass2	VarMod	Phosphoryl STY(7)	19169993	GVNIPNTKIPFPALAER	GVNIPNTKIPFPALAER	184	17	10.12	201	6	6	0	0	6328428	69911	Identified	4426	2.9	b8b9b9b11b13b15b17y1y5y5y7y11-H3PO4y16*y16	282966	1741	174968075484337	766453836562247	0.0031	Green	19510	19169992	19170021	332051	5154	5154.00	2.85	3	6396712
NCDO2118_RS07185	pyruvate kinase 1499467:1500975 reverse MW:54255	Regular	154824400	0	543119936	303	26	33	63.94	1668653	929782	775307	0	24	Pass2	VarMod	Oxidation M(4)	9074778	TNTMRIR	TNTMRIR	492	7	12.40	204	2	2	0	0	3939207	67852		1645	1.9	b6b7y6y7	45396	826	10643382394892	172867647897841	0.0023	Green	17643	9074748	9074764	321947	3807	3807.00	1.21	1	9074748
NCDO2118_RS07185	pyruvate kinase 1499467:1500975 reverse MW:54255	Regular	154824400	0	543119936	303	26	33	63.94	1668653	929782	775307	0	25	Pass2	VarMod	Oxidation M(12)	14787672	VGFLLDTKGPEMR	VGFLLDTKGPEMR	82	13	7.03	200	2	2	0	0	3638862	67508	Identified	402	1.9	b9b13y3	242119	1374	149423001520314	109423001520314	0.0013	Green	24913	14787634	14787643	361434	2107	2107.00	2.00	2	7398853
NCDO2118_RS07185	pyruvate kinase 1499467:1500975 reverse MW:54255	Regular	154824400	0	543119936	303	26	33	63.94	1668653	929782	775307	0	26	Pass2	VarMod	Oxidation M(8)	19559565	IVVTATNMLESMTYNPR	IVVTATNMLESMTYNPR	302	17	7.00	199	12	12	9	0	18932570	74670	Identified	6107	2.1	b2b3b4b4b5b5b6b6b10b11y2y3y5y6y7y8y9y17*	311813	1805	179230165172554	139230165172554	0.0012	Green	11759	19559727	19559708	289851	2010	2010.00	2.00	2	9784900
NCDO2118_RS07185	pyruvate kinase 1499467:1500975 reverse MW:54255	Regular	154824400	0	543119936	303	26	33	63.94	1668653	929782	775307	0	27	Pass2	InSource	None	5052980	SLTGK	LGLSLTGK	158	5	10.10	179	7	7	4	1	259067700	0.0000		6358	0.0	b3b3b4b5b5y1y2y3y3y4y4y5	160834	473	73395099123788	106790198247576	0.0177	Green	2462	5052970	5052987	209749	29605	29605.00	1.00	1	5052970
NCDO2118_RS07185	pyruvate kinase 1499467:1500975 reverse MW:54255	Regular	154824400	0	543119936	303	26	33	63.94	1668653	929782	775307	0	28	Pass2	InSource	None	7083927	NIAALIE	NIAALIEEGANVFR	40	7	3.31	189	4	4	1	1	14412780	0.0000		3650	0.0	b2b4b5b7*b7y2y3y3	360721	711	963102923907379	152620584781476	0.0153	Green	30864	7083921	7083939	404291	25499	25499.00	1.07	1	7083921
NCDO2118_RS07185	pyruvate kinase 1499467:1500975 reverse MW:54255	Regular	154824400	0	543119936	303	26	33	63.94	1668653	929782	775307	0	29	Pass2	InSource	None	4762715	LDTK	VGFLLDTK	86	4	6.78	183	6	6	4	2	357815000	0.0000		1494	0.0	b2b3y1y2y2y3y3y4	239030	443	702579464350205	100515892870041	0.0055	Green	6919	4762698	4762715	256013	9198	9198.00	1.00	1	4762698
NCDO2118_RS07185	pyruvate kinase 1499467:1500975 reverse MW:54255	Regular	154824400	0	543119936	303	26	33	63.94	1668653	929782	775307	0	30	Pass2	InSource	None	5863307	PVGTGR	VALASGLVESGDNIIIVAGVPVGTGR	486	6	11.05	187	3	3	0	0	1484048	0.0000	Missing	381	0.0	b6y1y3y3	399257	532	793781042037651	11875620840753	0.0030	Green	25646	5863303	5863321	365905	5035	5035.00	1.00	1	5863303
NCDO2118_RS07185	pyruvate kinase 1499467:1500975 reverse MW:54255	Regular	154824400	0	543119936	303	26	33	63.94	1668653	929782	775307	0	31	Pass2	InSource	None	6503257	TYNPR	IVVTATNMLESMTYNPR	314	5	9.84	185	0	0	0	0	1737820	0.0000	Missing	118	0.0	y3*	311813	568	829198532217113	125839706443423	0.0023	Green	16944	6503229	6503247	318731	3843	3843.00	1.00	1	6503229
NCDO2118_RS07185	pyruvate kinase 1499467:1500975 reverse MW:54255	Regular	154824400	0	543119936	303	26	33	63.94	1668653	929782	775307	0	32	Pass2	InSource	None	6633573	GANVFR	NIAALIEEGANVFR	48	6	11.05	189	2	2	0	0	813777	0.0000		1398	0.0	b5*y1y6y6*	360721	599	85910091671144	131820183342288	0.0014	Green	30871	6633548	6633567	404328	2388	2388.00	1.00	1	6633548
NCDO2118_RS07185	pyruvate kinase 1499467:1500975 reverse MW:54255	Regular	154824400	0	543119936	303	26	33	63.94	1668653	929782	775307	0	33	Pass2	InSource	None	8134577	AGVPVGTGR	VALASGLVESGDNIIIVAGVPVGTGR	483	9	11.05	187	1	1	0	0	436673	0.0000	Missing	71	0.0	y5	399257	752	999780958937454	159956191787491	0.0014	Green	25662	8134592	8134610	366007	2339	2339.00	1.00	1	8134592
NCDO2118_RS07185	pyruvate kinase 1499467:1500975 reverse MW:54255	Regular	154824400	0	543119936	303	26	33	63.94	1668653	929782	775307	0	34	Pass2	InSource	None	5492780	YNPR	IVVTATNMLESMTYNPR	315	4	9.84	185	1	1	0	0	3292061	0.0000	Missing	757	0.0	y4	311813	475	736018460525308	107203692105062	0.0012	Green	16953	5492768	5492786	318759	2015	2015.00	1.00	1	5492768
NCDO2118_RS07185	pyruvate kinase 1499467:1500975 reverse MW:54255	Regular	154824400	0	543119936	303	26	33	63.94	1668653	929782	775307	0	35	Pass2	InSource	None	9214425	EEGANVFR	NIAALIEEGANVFR	46	8	4.26	189	0	0	0	0	614408	0.0000		0	0.0		360721	817	105659286072213	171318572144426	0.0012	Green	30885	9214448	9214464	404484	1950	1950.00	1.00	1	9214448
NCDO2118_RS07185	pyruvate kinase 1499467:1500975 reverse MW:54255	Regular	154824400	0	543119936	303	26	33	63.94	1668653	929782	775307	0	36	Pass2	InSource	None	10195116	ALTESGNTAR	LIVALTESGNTAR	406	10	7.00	181	1	1	0	0	1911198	0.0000		620	0.0	y10	236213	918	114197015782606	188394031565211	0.0007	Green	3655	10195139	10195153	225795	1241	1241.00	1.00	1	10195139
NCDO2118_RS07185	pyruvate kinase 1499467:1500975 reverse MW:54255	Regular	154824400	0	543119936	303	26	33	63.94	1668653	929782	775307	0	37	Pass2	InSource	None	4172496	VGFL	VGFLLDTK	82	4	6.13	183	0	0	0	0	233204	0.0000		0	0.0		239030	412	669408328781834	938816657563668	0.0006	Green	6931	4172493	4172509	256050	982	982.00	1.00	1	4172493
NCDO2118_RS07185	pyruvate kinase 1499467:1500975 reverse MW:54255	Regular	154824400	0	543119936	303	26	33	63.94	1668653	929782	775307	0	38	Pass2	InSource	None	5352987	NVFR	NIAALIEEGANVFR	50	4	11.05	189	1	1	0	0	6045522	0.0000		183	0.0	y3	360721	484	74528642116772	109057284233544	0.0006	Green	30847	5352954	5352972	404079	930	930.00	1.00	1	5352954
NCDO2118_RS07185	pyruvate kinase 1499467:1500975 reverse MW:54255	Regular	25663320	0	543119936	77	12	33	41.24	120664	96308	47549	1	1	Pass1	PepFrag1	None	24643770	VALASGLVESGDNIIIVAGVPVGTGR	VALASGLVESGDNIIIVAGVPVGTGR	466	26	4.07	138	26	26	20	8	352498400	79565	Identified	31033	8.9	b2b3b4b6b7b8b8b9b10b12b13b13b14b14b15b15*b15b16b16b17b18b19b20y6y7y8y9y10y11y12y18y26	407348	2359	214245443756502	102830295837668	0.6057	Green	6730	24643834	24643795	370816	73085	73085.00	2.88	3	8221327
NCDO2118_RS07185	pyruvate kinase 1499467:1500975 reverse MW:54255	Regular	25663320	0	543119936	77	12	33	41.24	120664	96308	47549	0	2	Pass1	PepFrag1	None	7043210	DDADIR	DDADIR	201	6	3.59	144	6	6	1	1	14067440	65575		7923	3.1	b2b3b5y2y4y6	56336	612	871486336156241	134297267231248	0.1400	Green	996	7043201	7043218	96424	16898	16898.00	1.00	1	7043201
NCDO2118_RS07185	pyruvate kinase 1499467:1500975 reverse MW:54255	Regular	25663320	0	543119936	77	12	33	41.24	120664	96308	47549	0	3	Pass1	PepFrag1	None	10135778	IPFPALAER	IPFPALAER	192	9	7.00	136	5	5	4	0	18784640	66831	Identified	2401	2.5	y5y6y7y8y9	257003	954	117163377846316	771633778463164	0.0524	Green	5341	10135716	10135732	277008	6325	6325.00	2.00	2	5072894
NCDO2118_RS07185	pyruvate kinase 1499467:1500975 reverse MW:54255	Regular	25663320	0	543119936	77	12	33	41.24	120664	96308	47549	0	4	Pass1	PepFrag1	None	13447482	LIVALTESGNTAR	LIVALTESGNTAR	403	13	7.00	134	8	8	6	3	82759120	73271		1486	2.7	b3b4b5y6y7y8y9y10	238954	1271	141858926121739	101858926121739	0.0475	Green	4797	13447527	13447532	232047	5734	5734.00	2.00	2	6728800
NCDO2118_RS07185	pyruvate kinase 1499467:1500975 reverse MW:54255	Regular	25663320	0	543119936	77	12	33	41.24	120664	96308	47549	0	5	Pass1	PepFrag1	None	19399616	IVVTATNMLESMTYNPR	IVVTATNMLESMTYNPR	302	17	7.00	137	6	6	1	0	14571110	65728	Missing	439	2.8	b2b8y5y8y10y11	329889	1805	179230165172554	139230165172554	0.0366	Green	6033	19399603	19399568	325777	4422	4422.00	2.45	2	9704838
NCDO2118_RS07185	pyruvate kinase 1499467:1500975 reverse MW:54255	Regular	25663320	0	543119936	77	12	33	41.24	120664	96308	47549	0	6	Pass1	PepFrag1	None	33417363	STPELIALNVAGGLDIFDDVEIGQTILIDDGK	STPELIALNVAGGLDIFDDVEIGQTILIDDGK	123	32	3.23	143	7	7	3	0	24077250	67909	Missing	822	2.9	b8b9b10b11y4y5y6y8y10y10y26	512919	3154	260016411449035	133344274299357	0.0231	Green	8749	33417432	33417300	507059	2791	2791.00	3.00	3	11145859
NCDO2118_RS07185	pyruvate kinase 1499467:1500975 reverse MW:54255	Regular	25663320	0	543119936	77	12	33	41.24	120664	96308	47549	0	7	Pass1	PepFrag1	None	12547416	IVSTLGPAVEIR	IVSTLGPAVEIR	6	12	7.00	135	6	6	4	1	49328480	71024	Identified	846	1.9	b2y6y7y8y9y10	265589	1210	137282932554542	972829325545422	0.0201	Green	5066	12547384	12547392	252786	2424	2424.00	2.00	2	6278728
NCDO2118_RS07185	pyruvate kinase 1499467:1500975 reverse MW:54255	Regular	25663320	0	543119936	77	12	33	41.24	120664	96308	47549	0	8	Pass1	PepFrag1	None	8544367	AEEIAGHK	AEEIAGHK	74	8	5.30	133	2	2	0	0	11738580	64789		69	1.5	y4y7	63038	777	102181823041159	621818230411586	0.0161	Green	1038	8544346	8544364	97732	1937	1937.00	2.00	2	4277209
NCDO2118_RS07185	pyruvate kinase 1499467:1500975 reverse MW:54255	Regular	25663320	0	543119936	77	12	33	41.24	120664	96308	47549	0	9	Pass1	PepFrag1	None	15168118	NIAALIEEGANVFR	NIAALIEEGANVFR	40	14	4.26	140	3	3	1	0	4302551	60430		215	1.8	b4b5y12	339277	1419	152667958378682	112667958378682	0.0142	Green	7658	15168025	15168021	415901	1718	1718.00	2.00	2	7589049
NCDO2118_RS07185	pyruvate kinase 1499467:1500975 reverse MW:54255	Regular	25663320	0	543119936	77	12	33	41.24	120664	96308	47549	0	10	Pass1	PepFrag1	None	26553294	IENQQGIENLDEIIEAADGIMIAR	IENQQGIENLDEIIEAADGIMIAR	250	24	3.43	142	1	1	0	0	4253975	60381		175	2.0	y10y10	401899	2475	221212553895603	107475035930402	0.0103	Green	8088	26553393	26553337	448059	1245	1245.00	3.00	3	8857846
NCDO2118_RS07185	pyruvate kinase 1499467:1500975 reverse MW:54255	Regular	25663320	0	543119936	77	12	33	41.24	120664	96308	47549	0	11	Pass1	PepFrag1	None	19230487	FGLSQPGGINFIAISFVR	FGLSQPGGINFIAISFVR	207	18	11.05	141	3	3	0	1	25456160	68151	Identified	918	1.6	b5y7y13y18	418733	1811	179627131410996	139627131410996	0.0081	Green	7844	19230524	19230490	429510	981	981.00	2.00	2	9620298
NCDO2118_RS07185	pyruvate kinase 1499467:1500975 reverse MW:54255	Regular	25663320	0	543119936	77	12	33	41.24	120664	96308	47549	0	12	Pass1	PepFrag1	None	31264832	GLMINWGVIPTMTEKPSSTDDMFEVAEK	GLMINWGVIPTMTEKPSSTDDMFEVAEK	438	28	3.92	139	1	1	0	0	2289917	57691	Missing	265	1.9	b6*b8*y7y8y22	415722	2895	245579444639063	123719629759375	0.0078	Yellow	7376	31265051	31264945	400200	945	945.00	3.00	3	10428399
NCDO2118_RS07185	pyruvate kinase 1499467:1500975 reverse MW:54255	Regular	25663320	0	543119936	77	12	33	41.24	120664	96308	47549	0	13	Pass2	InSource	None	4742671	ADIR	DDADIR	203	4	7.00	144	2	2	0	0	838832	0.0000		356	0.0	y2y4	56336	430	688766376340322	977532752680643	0.0097	Green	1003	4742670	4742693	96545	1176	1176.00	1.00	1	4742670
NCDO2118_RS07185	pyruvate kinase 1499467:1500975 reverse MW:54255	Regular	25663320	0	543119936	77	12	33	41.24	120664	96308	47549	0	14	Pass2	InSource	None	7424206	GVPVGTGR	VALASGLVESGDNIIIVAGVPVGTGR	484	8	11.05	138	1	1	0	0	1007318	0.0000	Missing	601	0.0	y8	407348	685	939478145556335	147895629111267	0.0081	Green	6726	7424247	7424262	370703	983	983.00	1.00	1	7424247
NCDO2118_RS07185	pyruvate kinase 1499467:1500975 reverse MW:54255	Regular	29125020	0	543119936	39	5	33	20.32	51769	49809	17505	1	1	Pass1	PepFrag1	None	24643770	VALASGLVESGDNIIIVAGVPVGTGR	VALASGLVESGDNIIIVAGVPVGTGR	466	26	4.07	366	23	23	16	7	536954500	81942	Identified	14460	7.0	b3b5b6b7b8b9b13b14b15b16b17b18y4y6y7y8y9y10y11y12y17y18y26	366076	2359	214245443756502	102830295837668	0.7157	Green	14993	24643802	24643782	369709	37050	37050.00	2.87	3	8221316
NCDO2118_RS07185	pyruvate kinase 1499467:1500975 reverse MW:54255	Regular	29125020	0	543119936	39	5	33	20.32	51769	49809	17505	0	2	Pass1	PepFrag1	None	15347384	EFEVEAQNDGVIGK	EFEVEAQNDGVIGK	168	14	3.69	364	7	7	2	1	18146720	67231		1995	3.6	b2b2b3b4b5b6b7*b11y2y3y5y9y11	232840	1395	150941654454293	110941654454293	0.2106	Green	7304	15347359	15347364	208734	10901	10901.00	2.00	2	7678716
NCDO2118_RS07185	pyruvate kinase 1499467:1500975 reverse MW:54255	Regular	29125020	0	543119936	39	5	33	20.32	51769	49809	17505	0	3	Pass1	PepFrag1	None	33417363	STPELIALNVAGGLDIFDDVEIGQTILIDDGK	STPELIALNVAGGLDIFDDVEIGQTILIDDGK	123	32	3.23	367	6	6	1	0	10722800	64946	Missing	455	2.5	b6b11y5y8y10y11	460651	3154	260016411449035	133344274299357	0.0359	Green	16232	33417263	33417168	506586	1858	1858.00	3.00	3	11145803
NCDO2118_RS07185	pyruvate kinase 1499467:1500975 reverse MW:54255	Regular	29125020	0	543119936	39	5	33	20.32	51769	49809	17505	0	4	Pass1	PepFrag1	None	13447482	LIVALTESGNTAR	LIVALTESGNTAR	403	13	7.00	365	1	1	0	0	4827883	61480		123	1.5	y7	229185	1271	141858926121739	101858926121739	0.0209	Green	9166	13447461	13447476	229412	1082	1082.00	2.00	2	6728767
NCDO2118_RS07185	pyruvate kinase 1499467:1500975 reverse MW:54255	Regular	29125020	0	543119936	39	5	33	20.32	51769	49809	17505	0	5	Pass2	VarMod	Phosphoryl STY(*)	20199279	IVVTATNMLESMTYNPR	IVVTATNMLESMTYNPR	302	17	7.00	368	2	2	0	0	2116852	57900	Missing	472	1.5	b8y7y12y17	298883	1805	179230165172554	139230165172554	0.0170	Green	5984	20199304	20199270	193810	878	878.00	2.00	2	10104688
NCDO2118_RS07185	pyruvate kinase 1499467:1500975 reverse MW:54255	Regular	14227090	0	543119936	45	8	33	26.49	35895	23251	10766	1	1	Pass1	PepFrag1	None	24643770	VALASGLVESGDNIIIVAGVPVGTGR	VALASGLVESGDNIIIVAGVPVGTGR	466	26	4.07	777	16	16	11	3	182921000	74154	Identified	5513	5.1	b3b4b5b6b7b10b13b14b15b16y6y8y9y10y11y12	365074	2359	214245443756502	102830295837668	0.4272	Green	14366	24643852	24643824	369591	15333	15333.00	3.00	3	8221332
NCDO2118_RS07185	pyruvate kinase 1499467:1500975 reverse MW:54255	Regular	14227090	0	543119936	45	8	33	26.49	35895	23251	10766	0	2	Pass1	PepFrag1	None	15347384	EFEVEAQNDGVIGK	EFEVEAQNDGVIGK	168	14	3.69	775	7	7	3	2	58017550	69167		1173	2.6	b3b4b5b5b13*y8y9y9*y10y10*y11y13	222468	1395	150941654454293	110941654454293	0.1288	Green	6094	15347368	15347369	208437	4625	4625.00	2.00	2	7678720
NCDO2118_RS07185	pyruvate kinase 1499467:1500975 reverse MW:54255	Regular	14227090	0	543119936	45	8	33	26.49	35895	23251	10766	0	3	Pass1	PepFrag1	None	18088913	TELFADGADAISVVTGDK	TELFADGADAISVVTGDK	95	18	3.50	776	11	11	5	3	65386740	69686		1311	2.5	b3b4b7b8y4y5y10y14y15y16y18	297085	1666	169906358587853	129906358587853	0.0917	Green	11964	18088894	18088870	289722	3293	3293.00	2.00	2	9049483
NCDO2118_RS07185	pyruvate kinase 1499467:1500975 reverse MW:54255	Regular	14227090	0	543119936	45	8	33	26.49	35895	23251	10766	0	4	Pass1	PepFrag1	None	33417363	STPELIALNVAGGLDIFDDVEIGQTILIDDGK	STPELIALNVAGGLDIFDDVEIGQTILIDDGK	123	32	3.23	778	4	4	1	0	9909797	61492	Missing	299	2.4	b10y4y5y9y11	459313	3154	260016411449035	133344274299357	0.0425	Green	15611	33417477	33417357	506538	1525	1525.00	3.00	3	11145874
NCDO2118_RS07185	pyruvate kinase 1499467:1500975 reverse MW:54255	Regular	14227090	0	543119936	45	8	33	26.49	35895	23251	10766	0	5	Pass2	PepFrag2	None	12547416	IVSTLGPAVEIR	IVSTLGPAVEIR	6	12	7.00	782	1	1	0	0	452592	48088	Missing	52	2.1	y8	263660	1210	137282932554542	972829325545422	0.0808	Red	12048	12546916	12546935	291686	2900	2900.00	2.00	2	6278494
NCDO2118_RS07185	pyruvate kinase 1499467:1500975 reverse MW:54255	Regular	14227090	0	543119936	45	8	33	26.49	35895	23251	10766	0	6	Pass2	PepFrag2	Carbamidomethyl C(2)	17088687	ICEETGNPHVQLLAK	ICEETGNPHVQLLAK	235	15	5.30	779	3	3	0	0	1876528	54265	Identified	799	1.7	b7y1y15	243249	1542	161367430379895	121367430379895	0.0366	Yellow	5674	17088722	17088708	203394	1313	1313.00	2.00	2	8549397
NCDO2118_RS07185	pyruvate kinase 1499467:1500975 reverse MW:54255	Regular	14227090	0	543119936	45	8	33	26.49	35895	23251	10766	0	7	Pass2	PepFrag2	None	8424730	GVNIPNTK	GVNIPNTK	184	8	10.10	781	2	2	0	0	5769243	59142	Identified	653	1.2	y2y4	115774	787	103056674068113	630566740681125	0.0243	Green	2561	8424714	8424745	163693	873	873.00	2.00	2	4217393
NCDO2118_RS07185	pyruvate kinase 1499467:1500975 reverse MW:54255	Regular	14227090	0	543119936	45	8	33	26.49	35895	23251	10766	0	8	Pass2	MissedCleavage	None	22681475	IVVTATNMLESMTYNPRATR	IVVTATNMLESMTYNPRATR	302	20	9.84	780	1	1	0	0	1297222	52661	Missing	966	3.3	y7*y9y10*y12*y20	286848	2113	199079236075698	927194907171321	0.1681	Yellow	11213	22681227	22681214	274490	6033	6033.00	2.92	3	7567124
NCDO2118_RS07185	pyruvate kinase 1499467:1500975 reverse MW:54255	Regular	11718540	0	543119936	98	17	33	43.43	144473	71287	87720	1	1	Pass1	PepFrag1	None	26553294	IENQQGIENLDEIIEAADGIMIAR	IENQQGIENLDEIIEAADGIMIAR	250	24	3.43	1094	19	19	10	5	33963090	65999		60443	7.8	b5b6b7b7*b13b14b15b17b18y1y2y4y6y8y9y10y11y12y17y24y24*	375390	2475	221212553895603	181212553895603	0.3805	Green	17050	26553398	26553249	445172	54979	54979.00	2.00	2	13281735
NCDO2118_RS07185	pyruvate kinase 1499467:1500975 reverse MW:54255	Regular	11718540	0	543119936	98	17	33	43.43	144473	71287	87720	0	2	Pass1	PepFrag1	None	24643770	VALASGLVESGDNIIIVAGVPVGTGR	VALASGLVESGDNIIIVAGVPVGTGR	466	26	4.07	1093	12	12	8	2	58833550	68385	Identified	3091	4.2	b5b7b13b14b15b16y6y7y8y9y10y11y26*	373343	2359	214245443756502	102830295837668	0.0643	Green	15078	24643672	24643654	369005	9295	9295.00	2.86	3	8221272
NCDO2118_RS07185	pyruvate kinase 1499467:1500975 reverse MW:54255	Regular	11718540	0	543119936	98	17	33	43.43	144473	71287	87720	0	3	Pass1	PepFrag1	None	18088913	TELFADGADAISVVTGDK	TELFADGADAISVVTGDK	95	18	3.50	1092	12	12	2	3	73769340	69367		1760	3.3	b2b4b5b8b11b12b18y4y5y7y10y10y14y16y18	307012	1666	169906358587853	129906358587853	0.0485	Green	12873	18088985	18088965	323493	7013	7013.00	2.00	2	9049529
NCDO2118_RS07185	pyruvate kinase 1499467:1500975 reverse MW:54255	Regular	11718540	0	543119936	98	17	33	43.43	144473	71287	87720	0	4	Pass1	PepFrag1	None	11906627	STVTEVVAASVK	STVTEVVAASVK	382	12	7.00	1089	9	9	6	1	109246000	71073		1881	2.8	b2b2b3b4b5b5y3y4y5y6y7y8y9	204871	1130	131163177712208	911631777122084	0.0435	Green	5612	11906604	11906629	226297	6279	6279.00	2.00	2	5958338
NCDO2118_RS07185	pyruvate kinase 1499467:1500975 reverse MW:54255	Regular	11718540	0	543119936	98	17	33	43.43	144473	71287	87720	0	5	Pass1	PepFrag1	None	17399075	HRPNADILAITFDEK	HRPNADILAITFDEK	420	15	5.28	1098	4	4	0	1	20130280	63727	Missing	879	3.0	b7y4y6y8	286584	1612	166214787680525	708098584536835	0.0424	Green	14034	17399101	17399139	344025	6127	6127.00	3.00	3	5806416
NCDO2118_RS07185	pyruvate kinase 1499467:1500975 reverse MW:54255	Regular	11718540	0	543119936	98	17	33	43.43	144473	71287	87720	0	6	Pass1	PepFrag1	None	5733970	LIISK	LIISK	291	5	10.10	1097	4	4	1	1	46916760	67402		566	1.7	b2y2y2y3y5	150869	580	840836643499463	128167328699893	0.0259	Green	1429	5733961	5733975	150248	3749	3749.00	1.00	1	5733961
NCDO2118_RS07185	pyruvate kinase 1499467:1500975 reverse MW:54255	Regular	11718540	0	543119936	98	17	33	43.43	144473	71287	87720	0	7	Pass1	PepFrag1	None	16988810	IPFPALAERDDADIR	IPFPALAERDDADIR	192	15	3.97	1090	1	1	0	0	7956810	59696	Identified	360	2.2	y12	275111	1566	163037487006469	686916580043129	0.0182	Green	9329	16988784	16988824	272504	2634	2634.00	3.00	3	5669643
NCDO2118_RS07185	pyruvate kinase 1499467:1500975 reverse MW:54255	Regular	11718540	0	543119936	98	17	33	43.43	144473	71287	87720	0	8	Pass1	PepFrag1	None	15347384	EFEVEAQNDGVIGK	EFEVEAQNDGVIGK	168	14	3.69	1088	4	4	1	1	3513318	56146		311	1.9	b2b3b12b12y10y11	245304	1395	150941654454293	110941654454293	0.0132	Yellow	4202	15347468	15347473	207915	1906	1906.00	2.00	2	7678770
NCDO2118_RS07185	pyruvate kinase 1499467:1500975 reverse MW:54255	Regular	11718540	0	543119936	98	17	33	43.43	144473	71287	87720	0	9	Pass1	PepFrag1	Carbamidomethyl C(2)	17088687	ICEETGNPHVQLLAK	ICEETGNPHVQLLAK	235	15	5.30	1096	1	1	0	0	3346069	55934	Identified	84	1.7	y8y10*	219287	1542	161367430379895	121367430379895	0.0096	Yellow	3863	17088730	17088720	202774	1387	1387.00	2.00	2	8549401
NCDO2118_RS07185	pyruvate kinase 1499467:1500975 reverse MW:54255	Regular	11718540	0	543119936	98	17	33	43.43	144473	71287	87720	0	10	Pass1	PepFrag1	None	19318658	FGESGYWGESLDVEASAK	FGESGYWGESLDVEASAK	22	18	3.69	1091	2	2	0	0	6711542	58957		510	1.7	b12y18	291617	1718	17342368383482	756157892232132	0.0076	Green	12068	19318660	19318688	310539	1098	1098.00	2.63	3	6446269
NCDO2118_RS07185	pyruvate kinase 1499467:1500975 reverse MW:54255	Regular	11718540	0	543119936	98	17	33	43.43	144473	71287	87720	0	11	Pass1	PepFrag1	None	15987095	FNFSHGDHPEQGAR	FNFSHGDHPEQGAR	54	14	6.02	1087	2	2	0	0	1158663	51328	Identified	106	1.4	y1y6	138180	1390	150580765645106	603871770967373	0.0061	Yellow	2002	15987046	15987090	168306	887	887.00	3.00	3	5335731
NCDO2118_RS07185	pyruvate kinase 1499467:1500975 reverse MW:54255	Regular	11718540	0	543119936	98	17	33	43.43	144473	71287	87720	0	12	Pass2	PepFrag2	None	13027376	LGLSLTGKDAATR	LGLSLTGKDAATR	155	13	10.12	1095	0	0	0	0	525064	47891		39	1.9	y9	174441	1235	139167429587555	991674295875554	0.0142	Red	7826	13027240	13027260	252899	2052	2052.00	2.00	2	6518656
NCDO2118_RS07185	pyruvate kinase 1499467:1500975 reverse MW:54255	Regular	11718540	0	543119936	98	17	33	43.43	144473	71287	87720	0	13	Pass2	MissedCleavage	None	35106953	VERGLMINWGVIPTMTEKPSSTDDMFEVAEK	VERGLMINWGVIPTMTEKPSSTDDMFEVAEK	435	31	4.13	1099	3	3	0	0	7990110	59714	Missing	13171	4.2	b4b11b15b26b27y25y26y31y31*	380282	3257	265646933244262	928234666221312	0.0532	Green	15654	35106929	35106929	383582	7686	7686.00	3.97	4	8784287
NCDO2118_RS07185	pyruvate kinase 1499467:1500975 reverse MW:54255	Regular	11718540	0	543119936	98	17	33	43.43	144473	71287	87720	0	14	Pass2	VarMod	Phosphoryl STY(5)	13156075	ESVRTMATVNK	ESVRTMATVNK	352	11	10.12	1103	4	4	0	0	5370776	57989		1205	3.8	b9b11y5y8y10	127037	1148	132552389034328	925523890343285	0.1113	Green	8187	13156174	13156194	257631	16082	16082.00	2.00	2	6583123
NCDO2118_RS07185	pyruvate kinase 1499467:1500975 reverse MW:54255	Regular	11718540	0	543119936	98	17	33	43.43	144473	71287	87720	0	15	Pass2	VarMod	Oxidation M(21)	26713243	IENQQGIENLDEIIEAADGIMIAR	IENQQGIENLDEIIEAADGIMIAR	250	24	3.43	1100	14	14	9	1	28528160	65241		2447	4.2	b2b4b5b6b11b12b13b14b15y4y6y7y8y9y10	375390	2475	221212553895603	107475035930402	0.0689	Green	15970	26713251	26713210	394015	9960	9960.00	2.89	3	8911132
NCDO2118_RS07185	pyruvate kinase 1499467:1500975 reverse MW:54255	Regular	11718540	0	543119936	98	17	33	43.43	144473	71287	87720	0	16	Pass2	VarMod	Phosphoryl STY(4)	12706290	STVTEVVAASVK	STVTEVVAASVK	382	12	7.00	1102	0	0	0	0	1317764	51887		185	3.0	b9y9	204871	1130	131163177712208	911631777122084	0.0557	Yellow	3521	12706373	12706395	197557	8049	8049.00	2.00	2	6358223
NCDO2118_RS07185	pyruvate kinase 1499467:1500975 reverse MW:54255	Regular	11718540	0	543119936	98	17	33	43.43	144473	71287	87720	0	17	Pass2	VarMod	Phosphoryl STY(1)	12706290	STVTEVVAASVK	STVTEVVAASVK	382	12	7.00	1101	2	2	0	0	3196581	55736		414	1.5	b2-H3PO4b6-H3PO4b8b12y4y9	204871	1130	131163177712208	911631777122084	0.0075	Yellow	5878	12706331	12706353	229300	1082	1082.00	2.00	2	6358202
NCDO2118_RS07185	pyruvate kinase 1499467:1500975 reverse MW:54255	Regular	11718540	0	543119936	98	17	33	43.43	144473	71287	87720	0	18	Pass2	InSource	None	10465299	EAADGIMIAR	IENQQGIENLDEIIEAADGIMIAR	264	10	4.07	1094	2	2	0	0	913011	0.0000		92	0.0	b10y6	375390	969	118388309419006	196776618838012	0.0092	Green	17041	10465332	10465340	445096	1327	1327.00	1.00	1	10465332
NCDO2118_RS07185	pyruvate kinase 1499467:1500975 reverse MW:54255	Regular	11718540	0	543119936	98	17	33	43.43	144473	71287	87720	0	19	Pass2	InSource	None	8464502	ADGIMIAR	IENQQGIENLDEIIEAADGIMIAR	266	8	7.00	1094	0	0	0	0	423639	0.0000		0	0.0		375390	793	103579805793912	167159611587823	0.0074	Green	17042	8464523	8464536	445105	1075	1075.00	1.00	1	8464523
NCDO2118_RS07185	pyruvate kinase 1499467:1500975 reverse MW:54255	Regular	11718540	0	543119936	98	17	33	43.43	144473	71287	87720	0	20	Pass2	InSource	None	9174873	AADGIMIAR	IENQQGIENLDEIIEAADGIMIAR	265	9	7.00	1094	2	2	1	0	2864779	0.0000		105	0.0	y6y7	375390	860	109334847036295	17866969407259	0.0070	Green	17045	9174865	9174877	445136	1015	1015.00	1.00	1	9174865
NCDO2118_RS07185	pyruvate kinase 1499467:1500975 reverse MW:54255	Regular	11718540	0	543119936	98	17	33	43.43	144473	71287	87720	0	21	Pass2	InSource	None	14967227	IENQQGIENLDEI	IENQQGIENLDEIIEAADGIMIAR	250	13	2.89	1094	1	1	0	0	1720894	0.0000		71	0.0	b7y12*	375390	1382	1500024420831	1100024420831	0.0055	Green	17048	14967276	14967284	445153	791	791.00	2.00	2	7488675
NCDO2118_RS07185	pyruvate kinase 1499467:1500975 reverse MW:54255	Regular	230575000	0	543119936	280	23	33	65.34	2145476	1313943	1197715	1	1	Pass1	PepFrag1	None	19399616	IVVTATNMLESMTYNPR	IVVTATNMLESMTYNPR	302	17	7.00	82	30	30	26	13	2342159000	97324	Identified	184381	15.6	b2b3b4b4b5b5b6b6b7b7b8b8*b8b9b9b10b10b11b11b12b12b13b14b14b15b15b16b17b17*y2y3y3*y4y5y5y6y6y7y7*y8y8*y8y9y9y10y10*y10y11y11*y11y12y12y13y13*y14y14y15y15y16y17	316168	1805	179230165172554	139230165172554	0.2390	Green	18304	19399647	19399633	317738	512771	512771.00	2.27	2	9704860
NCDO2118_RS07185	pyruvate kinase 1499467:1500975 reverse MW:54255	Regular	230575000	0	543119936	280	23	33	65.34	2145476	1313943	1197715	0	2	Pass1	PepFrag1	None	24643770	VALASGLVESGDNIIIVAGVPVGTGR	VALASGLVESGDNIIIVAGVPVGTGR	466	26	4.07	84	41	41	34	16	1265812000	94652	Identified	318315	18.0	b2b3b4b5b5b6b6b7b7b8b8b9b10b10b11b11b12b13b13*b13b14b14b15b15*b15b16b16*b16b17b18b18*b20b20b21b26y2y3y4y4y5y6y6y7y8y9y9y10y11y12y13y15y15*y16y17y18y18*y19y20y21y23y24y26	400573	2359	214245443756502	174245443756502	0.2303	Green	27252	24643808	24643744	364774	494108	494108.00	2.57	2	12326940
NCDO2118_RS07185	pyruvate kinase 1499467:1500975 reverse MW:54255	Regular	230575000	0	543119936	280	23	33	65.34	2145476	1313943	1197715	0	3	Pass1	PepFrag1	None	31264832	GLMINWGVIPTMTEKPSSTDDMFEVAEK	GLMINWGVIPTMTEKPSSTDDMFEVAEK	438	28	3.92	85	23	23	12	6	252787100	87656	Identified	225405	15.5	b3b4b5b5*b6b6*b7*b8b8*b9b9*b11b11b12b13b14b18*b21*y1y4y4y5y10y13y16y18y19y20y21y22y22y23y24y25y26y28y28*	433483	2895	245579444639063	123719629759375	0.1431	Green	30872	31264837	31264750	387037	307064	307064.00	2.94	3	10428328
NCDO2118_RS07185	pyruvate kinase 1499467:1500975 reverse MW:54255	Regular	230575000	0	543119936	280	23	33	65.34	2145476	1313943	1197715	0	4	Pass1	PepFrag1	None	13447482	LIVALTESGNTAR	LIVALTESGNTAR	403	13	7.00	78	10	10	3	2	114512100	84217		142760	9.5	b6b7b7b9b11b11*b11b12b13b13y2y3y4y4*y8y11y12y13y13*	234410	1271	141858926121739	243717852243478	0.0815	Green	3881	13447501	13447506	214133	174945	174945.00	1.28	1	13447501
NCDO2118_RS07185	pyruvate kinase 1499467:1500975 reverse MW:54255	Regular	230575000	0	543119936	280	23	33	65.34	2145476	1313943	1197715	0	5	Pass1	PepFrag1	None	12547416	IVSTLGPAVEIR	IVSTLGPAVEIR	6	12	7.00	79	17	17	12	5	622706300	91571	Identified	131167	8.6	b2b3b3b4b4b5b5b6b8b8b9b9b12b12y2y3y5y6y7y8y9y9y10y10y11y12	268818	1210	137282932554542	972829325545422	0.0664	Green	6607	12547435	12547456	239722	142543	142543.00	1.96	2	6278754
NCDO2118_RS07185	pyruvate kinase 1499467:1500975 reverse MW:54255	Regular	230575000	0	543119936	280	23	33	65.34	2145476	1313943	1197715	0	6	Pass1	PepFrag1	None	8925138	VGFLLDTK	VGFLLDTK	82	8	6.78	80	11	11	8	3	757130000	92420		61913	7.4	b4b5b6b7y1y3y4y4y5y5y6y7y8	246523	855	108910656856658	177821313713317	0.0662	Green	7702	8925148	8925165	250485	142116	142116.00	1.00	1	8925148
NCDO2118_RS07185	pyruvate kinase 1499467:1500975 reverse MW:54255	Regular	230575000	0	543119936	280	23	33	65.34	2145476	1313943	1197715	0	7	Pass1	PepFrag1	None	7884876	LGLSLTGK	LGLSLTGK	155	8	10.10	76	12	12	9	3	369979500	89310		22649	5.8	b3b4b4b5b5b7b8b8y1y2y3y3y4y4y5y5y6y7y8	161101	769	101479237201927	162958474403854	0.0341	Green	2756	7884871	7884889	199856	73197	73197.00	1.00	1	7884871
NCDO2118_RS07185	pyruvate kinase 1499467:1500975 reverse MW:54255	Regular	230575000	0	543119936	280	23	33	65.34	2145476	1313943	1197715	0	8	Pass1	PepFrag1	None	15168118	NIAALIEEGANVFR	NIAALIEEGANVFR	40	14	4.26	86	19	19	15	6	360195200	89194		27271	7.1	b2b3b4b5b5*b6b7b8b8y1y2y3y4y4*y5y6y7y7*y8y8*y9y10y10*y11y11y12y14	366873	1419	152667958378682	112667958378682	0.0336	Green	32694	15168194	15168206	404782	72004	72004.00	2.07	2	7589133
NCDO2118_RS07185	pyruvate kinase 1499467:1500975 reverse MW:54255	Regular	230575000	0	543119936	280	23	33	65.34	2145476	1313943	1197715	0	9	Pass1	PepFrag1	None	19230487	FGLSQPGGINFIAISFVR	FGLSQPGGINFIAISFVR	207	18	11.05	87	18	18	7	6	87081290	83027	Identified	25475	7.1	b3b4b4b5b5*b5b7b9b11b12b12*b12b14b14b18y1y3y4y6y7y9y10y10y12y13y14y15	409339	1811	179627131410996	139627131410996	0.0258	Green	34271	19230568	19230555	423404	55425	55425.00	2.11	2	9620320
NCDO2118_RS07185	pyruvate kinase 1499467:1500975 reverse MW:54255	Regular	230575000	0	543119936	280	23	33	65.34	2145476	1313943	1197715	0	10	Pass1	PepFrag1	Carbamidomethyl C(2)	17088687	ICEETGNPHVQLLAK	ICEETGNPHVQLLAK	235	15	5.30	75	14	14	6	4	137340500	85006	Identified	13174	5.7	b2b5b7b10b11y2y4y8y10y11y12y13y13y14y14y15	198617	1542	161367430379895	6757828691993	0.0173	Green	435	17088704	17088726	45467	37074	37074.00	2.64	3	5702950
NCDO2118_RS07185	pyruvate kinase 1499467:1500975 reverse MW:54255	Regular	230575000	0	543119936	280	23	33	65.34	2145476	1313943	1197715	0	11	Pass1	PepFrag1	None	26553294	IENQQGIENLDEIIEAADGIMIAR	IENQQGIENLDEIIEAADGIMIAR	250	24	3.43	88	21	21	12	4	293281000	88301		13202	6.6	b2b3b6b7b7*b8b9*b11b12b13b13b14b16b20*y1y4y6y7y8y9y10y11y12y12y14y17y24	437606	2475	221212553895603	107475035930402	0.0158	Green	35932	26553376	26553338	443404	33916	33916.00	2.82	3	8857840
NCDO2118_RS07185	pyruvate kinase 1499467:1500975 reverse MW:54255	Regular	230575000	0	543119936	280	23	33	65.34	2145476	1313943	1197715	0	12	Pass1	PepFrag1	None	19389340	GDMGIEVPFEMVPVYQK	GDMGIEVPFEMVPVYQK	274	17	3.83	83	5	5	1	1	31044130	78548	Identified	5463	4.6	b4b7b7y7y10y11	390889	1797	178700191922053	138700191922053	0.0085	Green	26566	19389437	19389422	361030	18209	18209.00	2.03	2	9699755
NCDO2118_RS07185	pyruvate kinase 1499467:1500975 reverse MW:54255	Regular	230575000	0	543119936	280	23	33	65.34	2145476	1313943	1197715	0	13	Pass1	PepFrag1	None	11906627	STVTEVVAASVK	STVTEVVAASVK	382	12	7.00	77	7	7	4	3	65859370	81814		1693	2.7	b2b3b3b4y6y8y9y10	226274	1130	131163177712208	911631777122084	0.0028	Green	3161	11906636	11906658	206625	6101	6101.00	2.00	2	5958354
NCDO2118_RS07185	pyruvate kinase 1499467:1500975 reverse MW:54255	Regular	230575000	0	543119936	280	23	33	65.34	2145476	1313943	1197715	0	14	Pass1	PepFrag1	None	33417363	STPELIALNVAGGLDIFDDVEIGQTILIDDGK	STPELIALNVAGGLDIFDDVEIGQTILIDDGK	123	32	3.23	89	5	5	0	0	24305540	77485	Missing	2871	3.7	b6b16b17y4y4y5y6y6y10y17y27y32	534978	3154	260016411449035	133344274299357	0.0025	Green	40036	33417292	33417178	506730	5346	5346.00	2.72	3	11145812
NCDO2118_RS07185	pyruvate kinase 1499467:1500975 reverse MW:54255	Regular	230575000	0	543119936	280	23	33	65.34	2145476	1313943	1197715	0	15	Pass1	PepFrag1	None	16988810	IPFPALAERDDADIR	IPFPALAERDDADIR	192	15	3.97	81	1	1	0	0	3253456	68752	Identified	1689	2.1	y6y14y15	283127	1566	163037487006469	123037487006469	0.0012	Green	16210	16988848	16988850	306959	2545	2545.00	2.00	2	8499460
NCDO2118_RS07185	pyruvate kinase 1499467:1500975 reverse MW:54255	Regular	230575000	0	543119936	280	23	33	65.34	2145476	1313943	1197715	0	16	Pass1	PepFrag1	None	10135778	IPFPALAER	IPFPALAER	192	9	7.00	90	2	2	1	0	3629213	69226	Identified	1091	1.5	y8y9	243629	954	117163377846316	194326755692633	0.0007	Green	22895	10135714	10135729	341836	1593	1593.00	1.00	1	10135714
NCDO2118_RS07185	pyruvate kinase 1499467:1500975 reverse MW:54255	Regular	230575000	0	543119936	280	23	33	65.34	2145476	1313943	1197715	0	17	Pass1	PepFrag1	None	17399075	HRPNADILAITFDEK	HRPNADILAITFDEK	420	15	5.28	91	3	3	0	1	5228393	70812	Missing	425	1.6	b14y1y5	268506	1612	166214787680525	708098584536835	0.0006	Green	17528	17399034	17399055	313981	1196	1196.00	3.00	3	5806393
NCDO2118_RS07185	pyruvate kinase 1499467:1500975 reverse MW:54255	Regular	230575000	0	543119936	280	23	33	65.34	2145476	1313943	1197715	0	18	Pass2	MissedCleavage	None	17279327	AEEIAGHKVGFLLDTK	AEEIAGHKVGFLLDTK	74	16	5.35	92	2	2	0	0	5161662	70756		72	1.6	b9y2	259724	1632	167586772513349	717245150088992	0.0005	Green	10619	17279217	17279238	273743	1125	1125.00	3.00	3	5766454
NCDO2118_RS07185	pyruvate kinase 1499467:1500975 reverse MW:54255	Regular	230575000	0	543119936	280	23	33	65.34	2145476	1313943	1197715	0	19	Pass2	MissedCleavage	None	31444790	SEISDVFNAVIDGTDATMLSGESANGKYPR	SEISDVFNAVIDGTDATMLSGESANGKYPR	322	30	3.86	93	1	1	0	0	2632365	67832	Missing	110	1.8	b9y16	353348	2861	243652874528969	122435249685979	0.0004	Green	30350	31444824	31444735	383625	793	793.00	3.00	3	10488323
NCDO2118_RS07185	pyruvate kinase 1499467:1500975 reverse MW:54255	Regular	230575000	0	543119936	280	23	33	65.34	2145476	1313943	1197715	0	20	Pass2	VarMod	Phosphoryl STY(7)	19169993	GVNIPNTKIPFPALAER	GVNIPNTKIPFPALAER	184	17	10.12	97	1	1	0	0	966607	63481	Identified	519	3.1	b7b9b9-H3PO4b10y1y8	275884	1741	174968075484337	766453836562247	0.0029	Green	20802	19170042	19170055	331082	6308	6308.00	3.06	3	6396729
NCDO2118_RS07185	pyruvate kinase 1499467:1500975 reverse MW:54255	Regular	230575000	0	543119936	280	23	33	65.34	2145476	1313943	1197715	0	21	Pass2	VarMod	Oxidation M(3)	31424781	GLMINWGVIPTMTEKPSSTDDMFEVAEK	GLMINWGVIPTMTEKPSSTDDMFEVAEK	438	28	3.92	95	4	4	0	0	3910766	69551	Missing	1697	3.7	b5b17b18*b21*b28y2y28	433483	2895	245579444639063	123719629759375	0.0028	Green	30855	31424871	31424782	386886	5926	5926.00	2.93	3	10481672
NCDO2118_RS07185	pyruvate kinase 1499467:1500975 reverse MW:54255	Regular	230575000	0	543119936	280	23	33	65.34	2145476	1313943	1197715	0	22	Pass2	VarMod	Phosphoryl STY(3)	9244914	VATKQGLK	VATKQGLK	115	8	10.60	96	3	3	0	0	4499397	70160		295	1.7	b4b7y7y7*y8*	23720	821	106003874422626	660038744226262	0.0011	Green	7736	9244916	9244943	250755	2417	2417.00	1.62	2	4627495
NCDO2118_RS07185	pyruvate kinase 1499467:1500975 reverse MW:54255	Regular	230575000	0	543119936	280	23	33	65.34	2145476	1313943	1197715	0	23	Pass2	VarMod	Oxidation M(8)	19559565	IVVTATNMLESMTYNPR	IVVTATNMLESMTYNPR	302	17	7.00	94	11	11	5	1	21190660	76890	Identified	4679	2.2	b2b3b4b4b5b6b10b14y2y3y4y6y6*y8y9y12*y15*	316168	1805	179230165172554	139230165172554	0.0011	Green	12862	19559536	19559520	287905	2332	2332.00	2.00	2	9784804
NCDO2118_RS07185	pyruvate kinase 1499467:1500975 reverse MW:54255	Regular	230575000	0	543119936	280	23	33	65.34	2145476	1313943	1197715	0	24	Pass2	InSource	None	7424206	GVPVGTGR	VALASGLVESGDNIIIVAGVPVGTGR	484	8	11.05	84	3	3	0	0	3033980	0.0000	Missing	6176	0.0	b3b6y8	400573	685	939478145556335	147895629111267	0.0047	Green	27262	7424208	7424226	364822	10185	10185.00	1.00	1	7424208
NCDO2118_RS07185	pyruvate kinase 1499467:1500975 reverse MW:54255	Regular	230575000	0	543119936	280	23	33	65.34	2145476	1313943	1197715	0	25	Pass2	InSource	None	5863307	PVGTGR	VALASGLVESGDNIIIVAGVPVGTGR	486	6	11.05	84	3	3	0	0	1202434	0.0000	Missing	236	0.0	b2b4b6y1	400573	532	793781042037651	11875620840753	0.0034	Green	27248	5863306	5863323	364757	7217	7217.00	1.00	1	5863306
NCDO2118_RS07185	pyruvate kinase 1499467:1500975 reverse MW:54255	Regular	230575000	0	543119936	280	23	33	65.34	2145476	1313943	1197715	0	26	Pass2	InSource	None	4762715	LDTK	VGFLLDTK	86	4	6.78	80	5	5	2	1	272893500	0.0000		973	0.0	b2b4y2y2y3y3y4	246523	443	702579464350205	100515892870041	0.0026	Green	7700	4762697	4762713	250433	5612	5612.00	1.00	1	4762697
NCDO2118_RS07185	pyruvate kinase 1499467:1500975 reverse MW:54255	Regular	230575000	0	543119936	280	23	33	65.34	2145476	1313943	1197715	0	27	Pass2	InSource	None	6503257	TYNPR	IVVTATNMLESMTYNPR	314	5	9.84	82	0	0	0	0	2196761	0.0000	Missing	45	0.0	y4*	316168	568	829198532217113	125839706443423	0.0023	Green	18282	6503261	6503279	317662	4937	4937.00	1.00	1	6503261
NCDO2118_RS07185	pyruvate kinase 1499467:1500975 reverse MW:54255	Regular	230575000	0	543119936	280	23	33	65.34	2145476	1313943	1197715	0	28	Pass2	InSource	None	8683982	SMTYNPR	IVVTATNMLESMTYNPR	312	7	9.84	82	1	1	0	0	3696159	0.0000	Missing	2550	0.0	y7y7*	316168	765	101127031163723	162254062327446	0.0017	Green	18310	8683963	8683981	317756	3653	3653.00	1.00	1	8683963
NCDO2118_RS07185	pyruvate kinase 1499467:1500975 reverse MW:54255	Regular	230575000	0	543119936	280	23	33	65.34	2145476	1313943	1197715	0	29	Pass2	InSource	None	9435281	IVVTATNML	IVVTATNMLESMTYNPR	302	9	6.13	82	0	0	0	0	1430416	0.0000		0	0.0		316168	931	115272599814041	752725998140409	0.0016	Green	18258	9435227	9435254	317580	3402	3402.00	2.00	2	4722650
NCDO2118_RS07185	pyruvate kinase 1499467:1500975 reverse MW:54255	Regular	230575000	0	543119936	280	23	33	65.34	2145476	1313943	1197715	0	30	Pass2	InSource	None	9125261	VAGVPVGTGR	VALASGLVESGDNIIIVAGVPVGTGR	482	10	11.05	84	1	1	0	0	12867340	0.0000	Identified	239	0.0	y6	400573	857	109080431890802	178160863781604	0.0015	Green	27279	9125263	9125280	364936	3203	3203.00	1.00	1	9125263
NCDO2118_RS07185	pyruvate kinase 1499467:1500975 reverse MW:54255	Regular	230575000	0	543119936	280	23	33	65.34	2145476	1313943	1197715	0	31	Pass2	InSource	None	6114127	LIVALT	LIVALTESGNTAR	403	6	6.13	78	3	3	2	0	7676316	0.0000		270	0.0	b2b3b4y3	234410	637	895060906881961	139012181376392	0.0014	Green	3889	6114122	6114140	214159	2961	2961.00	1.00	1	6114122
NCDO2118_RS07185	pyruvate kinase 1499467:1500975 reverse MW:54255	Regular	230575000	0	543119936	280	23	33	65.34	2145476	1313943	1197715	0	32	Pass2	InSource	None	5492780	YNPR	IVVTATNMLESMTYNPR	315	4	9.84	82	2	2	1	0	41682270	0.0000	Identified	874	0.0	b2*y3y4	316168	475	736018460525308	107203692105062	0.0011	Green	18237	5492771	5492788	317539	2281	2281.00	1.00	1	5492771
NCDO2118_RS07185	pyruvate kinase 1499467:1500975 reverse MW:54255	Regular	230575000	0	543119936	280	23	33	65.34	2145476	1313943	1197715	0	33	Pass2	InSource	None	6633573	GANVFR	NIAALIEEGANVFR	48	6	11.05	86	1	1	0	0	106819	0.0000		36	0.0	y1	366873	599	85910091671144	131820183342288	0.0008	Green	32670	6633562	6633580	404679	1791	1791.00	1.00	1	6633562
NCDO2118_RS07185	pyruvate kinase 1499467:1500975 reverse MW:54255	Regular	230575000	0	543119936	280	23	33	65.34	2145476	1313943	1197715	0	34	Pass2	InSource	None	9214425	EEGANVFR	NIAALIEEGANVFR	46	8	4.26	86	0	0	0	0	592249	0.0000		0	0.0		366873	817	105659286072213	171318572144426	0.0005	Green	32714	9214454	9214471	404858	1180	1180.00	1.00	1	9214454
NCDO2118_RS07185	pyruvate kinase 1499467:1500975 reverse MW:54255	Regular	26009160	0	543119936	105	11	33	30.88	198469	154808	80656	1	1	Pass1	PepFrag1	None	24643770	VALASGLVESGDNIIIVAGVPVGTGR	VALASGLVESGDNIIIVAGVPVGTGR	466	26	4.07	196	30	30	25	10	243882100	78023	Identified	42971	10.0	b3b4b5b6b6b7b7b8b8b9b10b10b12b13b14b15b15b16b16b17b18b19b20y4y5y6y7y8y9y10y11y12y17y18y19y26y26*	412274	2359	214245443756502	102830295837668	0.5052	Green	7667	24643963	24643913	369528	100270	100270.00	2.83	3	8221370
NCDO2118_RS07185	pyruvate kinase 1499467:1500975 reverse MW:54255	Regular	26009160	0	543119936	105	11	33	30.88	198469	154808	80656	0	2	Pass1	PepFrag1	None	7043210	DDADIR	DDADIR	201	6	3.59	199	7	7	5	2	141890300	75671		20062	4.0	b3b4y2y3y4y5y6	51904	612	871486336156241	134297267231248	0.2046	Green	1131	7043198	7043212	98522	40615	40615.00	1.00	1	7043198
NCDO2118_RS07185	pyruvate kinase 1499467:1500975 reverse MW:54255	Regular	26009160	0	543119936	105	11	33	30.88	198469	154808	80656	0	3	Pass1	PepFrag1	None	13447482	LIVALTESGNTAR	LIVALTESGNTAR	403	13	7.00	192	12	12	10	4	221611600	77607		5235	3.8	b2b3b4b5y5y6y7y8y9y9y10y10y11y12	246451	1271	141858926121739	101858926121739	0.0702	Green	5430	13447505	13447509	230748	13923	13923.00	2.00	2	6728789
NCDO2118_RS07185	pyruvate kinase 1499467:1500975 reverse MW:54255	Regular	26009160	0	543119936	105	11	33	30.88	198469	154808	80656	0	4	Pass1	PepFrag1	None	10135778	IPFPALAER	IPFPALAER	192	9	7.00	194	6	6	3	1	25196560	68165	Identified	3460	3.1	b2y4y6y7y8y9	248903	954	117163377846316	771633778463164	0.0570	Green	6119	10135748	10135763	275942	11303	11303.00	2.00	2	5072910
NCDO2118_RS07185	pyruvate kinase 1499467:1500975 reverse MW:54255	Regular	26009160	0	543119936	105	11	33	30.88	198469	154808	80656	0	5	Pass1	PepFrag1	None	8544367	AEEIAGHK	AEEIAGHK	74	8	5.30	190	9	9	7	2	37377740	69877		2562	2.5	b2b3y2y3y4y5y6y6y7y8	57062	777	102181823041159	621818230411586	0.0368	Green	928	8544299	8544316	91769	7295	7295.00	1.71	2	4277186
NCDO2118_RS07185	pyruvate kinase 1499467:1500975 reverse MW:54255	Regular	26009160	0	543119936	105	11	33	30.88	198469	154808	80656	0	6	Pass1	PepFrag1	None	19399616	IVVTATNMLESMTYNPR	IVVTATNMLESMTYNPR	302	17	7.00	195	11	11	3	2	86280560	73510	Identified	959	3.1	b4b8y2y4y5y7y9y10y12y13y17y17*	316675	1805	179230165172554	139230165172554	0.0299	Green	6931	19399611	19399578	324196	5939	5939.00	2.44	2	9704842
NCDO2118_RS07185	pyruvate kinase 1499467:1500975 reverse MW:54255	Regular	26009160	0	543119936	105	11	33	30.88	198469	154808	80656	0	7	Pass1	PepFrag1	None	15168118	NIAALIEEGANVFR	NIAALIEEGANVFR	40	14	4.26	198	7	7	2	2	34372500	69513		799	2.2	b4b8y6y8y9y10y12	345026	1419	152667958378682	112667958378682	0.0146	Green	8531	15168113	15168109	413599	2893	2893.00	2.00	2	7589093
NCDO2118_RS07185	pyruvate kinase 1499467:1500975 reverse MW:54255	Regular	26009160	0	543119936	105	11	33	30.88	198469	154808	80656	0	8	Pass1	PepFrag1	None	12547416	IVSTLGPAVEIR	IVSTLGPAVEIR	6	12	7.00	193	4	4	3	0	7120735	62677	Identified	440	1.9	b4y6y7y8y9	271271	1210	137282932554542	972829325545422	0.0116	Yellow	5784	12547388	12547396	252018	2306	2306.00	2.00	2	6278731
NCDO2118_RS07185	pyruvate kinase 1499467:1500975 reverse MW:54255	Regular	26009160	0	543119936	105	11	33	30.88	198469	154808	80656	0	9	Pass1	PepFrag1	None	26553294	IENQQGIENLDEIIEAADGIMIAR	IENQQGIENLDEIIEAADGIMIAR	250	24	3.43	197	4	4	2	0	5536960	61584		256	2.3	y6y8y9y10	386777	2475	221212553895603	107475035930402	0.0096	Yellow	8937	26553325	26553263	446141	1912	1912.00	3.00	3	8857824
NCDO2118_RS07185	pyruvate kinase 1499467:1500975 reverse MW:54255	Regular	26009160	0	543119936	105	11	33	30.88	198469	154808	80656	0	10	Pass1	PepFrag1	None	19230487	FGLSQPGGINFIAISFVR	FGLSQPGGINFIAISFVR	207	18	11.05	200	3	3	0	1	15138060	65952	Identified	658	1.8	b5y13y18	434279	1811	179627131410996	139627131410996	0.0067	Yellow	8718	19230522	19230490	428101	1328	1328.00	2.00	2	9620297
NCDO2118_RS07185	pyruvate kinase 1499467:1500975 reverse MW:54255	Regular	26009160	0	543119936	105	11	33	30.88	198469	154808	80656	0	11	Pass1	PepFrag1	None	7884876	LGLSLTGK	LGLSLTGK	155	8	10.10	191	1	1	0	0	2346563	57856		97	1.1	y7	190513	769	101479237201927	614792372019271	0.0040	Yellow	5297	7884812	7884830	222612	797	797.00	2.00	2	3947443
NCDO2118_RS07185	pyruvate kinase 1499467:1500975 reverse MW:54255	Regular	26009160	0	543119936	105	11	33	30.88	198469	154808	80656	0	12	Pass2	InSource	None	4742671	ADIR	DDADIR	203	4	7.00	199	2	2	0	0	1016205	0.0000		693	0.0	y2y4	51904	430	688766376340322	977532752680643	0.0135	Green	1130	4742644	4742661	98510	2679	2679.00	1.00	1	4742644
NCDO2118_RS07185	pyruvate kinase 1499467:1500975 reverse MW:54255	Regular	26009160	0	543119936	105	11	33	30.88	198469	154808	80656	0	13	Pass2	InSource	None	17229636	VALASGLVESGDNIIIVA	VALASGLVESGDNIIIVAGVPVGTGR	466	18	3.01	196	3	3	1	0	3891704	0.0000		570	0.0	b7b13b14y11y15	412274	1674	170449842120481	130449842120481	0.0107	Green	7668	17229660	17229644	369565	2123	2123.00	2.00	2	8619867
NCDO2118_RS07185	pyruvate kinase 1499467:1500975 reverse MW:54255	Regular	26009160	0	543119936	105	11	33	30.88	198469	154808	80656	0	14	Pass2	InSource	None	5892940	DADIR	DDADIR	202	5	3.88	199	3	3	0	0	1469095	0.0000		816	0.0	b5y2y5	51904	521	782801140493743	116560228098749	0.0096	Green	1133	5892935	5892952	98556	1907	1907.00	1.00	1	5892935
NCDO2118_RS07185	pyruvate kinase 1499467:1500975 reverse MW:54255	Regular	26009160	0	543119936	105	11	33	30.88	198469	154808	80656	0	15	Pass2	InSource	None	7424206	GVPVGTGR	VALASGLVESGDNIIIVAGVPVGTGR	484	8	11.05	196	1	1	0	0	1340491	0.0000	Missing	865	0.0	y8	412274	685	939478145556335	147895629111267	0.0058	Green	7669	7424150	7424162	369578	1161	1161.00	1.00	1	7424150
NCDO2118_RS07185	pyruvate kinase 1499467:1500975 reverse MW:54255	Regular	26009160	0	543119936	105	11	33	30.88	198469	154808	80656	0	16	Pass2	InSource	None	6754036	GLSLTGK	LGLSLTGK	156	7	10.10	191	2	2	0	0	2656990	0.0000		213	0.0	y3y7	190513	645	902539276707172	140507855341434	0.0052	Yellow	5295	6754003	6754017	222577	1023	1023.00	1.00	1	6754003
NCDO2118_RS07185	pyruvate kinase 1499467:1500975 reverse MW:54255	Regular	26009160	0	543119936	105	11	33	30.88	198469	154808	80656	0	17	Pass2	InSource	None	5863307	PVGTGR	VALASGLVESGDNIIIVAGVPVGTGR	486	6	11.05	196	0	0	0	0	1085859	0.0000	Missing	0	0.0		412274	532	793781042037651	11875620840753	0.0050	Green	7672	5863307	5863323	369622	995	995.00	1.00	1	5863307
NCDO2118_RS07185	pyruvate kinase 1499467:1500975 reverse MW:54255	Regular	27106470	0	543119936	55	10	33	28.09	157725	83389	25439	1	1	Pass1	PepFrag1	None	24643770	VALASGLVESGDNIIIVAGVPVGTGR	VALASGLVESGDNIIIVAGVPVGTGR	466	26	4.07	540	24	24	19	5	488957000	81223	Identified	15349	7.9	b2b3b4b5b6b7b8b9b10b12b14b14b15b15b16b17b18y6y7y8y9y10y11y12y13y26	364547	2359	214245443756502	102830295837668	0.3285	Green	22339	24643830	24643809	369300	51809	51809.00	2.87	3	8221325
NCDO2118_RS07185	pyruvate kinase 1499467:1500975 reverse MW:54255	Regular	27106470	0	543119936	55	10	33	28.09	157725	83389	25439	0	2	Pass1	PepFrag1	None	15347384	EFEVEAQNDGVIGK	EFEVEAQNDGVIGK	168	14	3.69	538	8	8	3	1	21839160	67723		4458	4.6	b2b3b3b7*b12y2y3y7y8y8*y9y12	223537	1395	150941654454293	110941654454293	0.1381	Green	10399	15347429	15347436	207766	21788	21788.00	2.00	2	7678751
NCDO2118_RS07185	pyruvate kinase 1499467:1500975 reverse MW:54255	Regular	27106470	0	543119936	55	10	33	28.09	157725	83389	25439	0	3	Pass1	PepFrag1	None	7884876	LGLSLTGK	LGLSLTGK	155	8	10.10	542	1	1	0	0	1579886	56317		2002	2.8	y4y8	187030	769	101479237201927	162958474403854	0.0621	Yellow	8451	7884873	7884892	193745	9792	9792.00	1.00	1	7884873
NCDO2118_RS07185	pyruvate kinase 1499467:1500975 reverse MW:54255	Regular	27106470	0	543119936	55	10	33	28.09	157725	83389	25439	0	4	Pass1	PepFrag1	None	8424730	GVNIPNTK	GVNIPNTK	184	8	10.10	536	4	4	1	1	22624340	67876	Identified	1205	1.7	b3b4y4y4*y6y8	116163	787	103056674068113	166113348136225	0.0151	Green	2614	8424720	8424739	142776	2374	2374.00	1.38	1	8424720
NCDO2118_RS07185	pyruvate kinase 1499467:1500975 reverse MW:54255	Regular	27106470	0	543119936	55	10	33	28.09	157725	83389	25439	0	5	Pass1	PepFrag1	None	33417363	STPELIALNVAGGLDIFDDVEIGQTILIDDGK	STPELIALNVAGGLDIFDDVEIGQTILIDDGK	123	32	3.23	541	2	2	0	0	4445436	60810	Missing	189	2.6	b10b10*y10	455948	3154	260016411449035	133344274299357	0.0126	Green	24020	33417397	33417254	506582	1981	1981.00	3.00	3	11145848
NCDO2118_RS07185	pyruvate kinase 1499467:1500975 reverse MW:54255	Regular	27106470	0	543119936	55	10	33	28.09	157725	83389	25439	0	6	Pass1	PepFrag1	None	9624612	NAAEAMDIK	NAAEAMDIK	394	9	4.07	537	4	4	1	1	8983762	63865		900	1.4	b2y2y3y7	155750	880	111023457736826	710234577368262	0.0083	Green	3597	9624620	9624640	154322	1302	1302.00	2.00	2	4817347
NCDO2118_RS07185	pyruvate kinase 1499467:1500975 reverse MW:54255	Regular	27106470	0	543119936	55	10	33	28.09	157725	83389	25439	0	7	Pass1	PepFrag1	None	13447482	LIVALTESGNTAR	LIVALTESGNTAR	403	13	7.00	539	6	6	2	1	12417550	65271		475	1.4	b2b3b11y1y7y8y11	228355	1271	141858926121739	101858926121739	0.0059	Green	13172	13447525	13447538	227748	934	934.00	2.00	2	6728799
NCDO2118_RS07185	pyruvate kinase 1499467:1500975 reverse MW:54255	Regular	27106470	0	543119936	55	10	33	28.09	157725	83389	25439	0	8	Pass2	PepFrag2	None	13106521	NAQTMLKEYGR	NAQTMLKEYGR	363	11	9.72	545	0	0	0	0	967838	54189		64	2.5	b6*	159056	1199	136449649027853	964496490278527	0.0330	Yellow	6050	13106256	13106270	174883	5204	5204.00	2.00	2	6558164
NCDO2118_RS07185	pyruvate kinase 1499467:1500975 reverse MW:54255	Regular	27106470	0	543119936	55	10	33	28.09	157725	83389	25439	0	9	Pass2	VarMod	Phosphoryl STY(*)	14247145	LIVALTESGNTAR	LIVALTESGNTAR	403	13	7.00	543	1	1	0	0	904304	53894		152	6.2	b7y10-H3PO4y12*	228355	1271	141858926121739	101858926121739	0.3467	Yellow	16202	14247083	14247094	255380	54687	54687.00	2.00	2	7128578
NCDO2118_RS07185	pyruvate kinase 1499467:1500975 reverse MW:54255	Regular	27106470	0	543119936	55	10	33	28.09	157725	83389	25439	0	10	Pass2	VarMod	Phosphoryl STY(15)	21920271	TELFADGADAISVVTGDKFR	TELFADGADAISVVTGDKFR	95	20	3.97	544	5	5	2	0	1914562	57151		645	3.6	b8b10b11b12b12b14y13y18	329459	1949	188640176287049	857601175246993	0.0498	Green	21705	21920083	21920088	345758	7854	7854.00	2.78	3	7313410
NCDO2118_RS07185	pyruvate kinase 1499467:1500975 reverse MW:54255	Regular	14251120	0	543119936	67	13	33	39.44	188157	133014	19166	1	1	Pass1	PepFrag1	Carbamidomethyl C(2)	17088687	ICEETGNPHVQLLAK	ICEETGNPHVQLLAK	235	15	5.30	1246	6	6	1	2	15302490	63386	Missing	1671	8.1	b4b5b8y7y10y13	218256	1542	161367430379895	6757828691993	0.5115	Green	7749	17088653	17088686	200532	96251	96251.00	3.00	3	5702933
NCDO2118_RS07185	pyruvate kinase 1499467:1500975 reverse MW:54255	Regular	14251120	0	543119936	67	13	33	39.44	188157	133014	19166	0	2	Pass1	PepFrag1	None	24643770	VALASGLVESGDNIIIVAGVPVGTGR	VALASGLVESGDNIIIVAGVPVGTGR	466	26	4.07	1244	18	18	11	4	148956100	73269	Identified	7020	5.5	b3b4b7b8b9b13b14b15b16b20y6y7y8y9y10y11y17y26	359385	2359	214245443756502	102830295837668	0.1021	Green	22250	24643855	24643826	368930	19214	19214.00	2.85	3	8221333
NCDO2118_RS07185	pyruvate kinase 1499467:1500975 reverse MW:54255	Regular	14251120	0	543119936	67	13	33	39.44	188157	133014	19166	0	3	Pass1	PepFrag1	None	18088913	TELFADGADAISVVTGDK	TELFADGADAISVVTGDK	95	18	3.50	1243	16	16	9	4	127457500	72592		6134	4.6	b2b3b4b4b5b5b6b8b9b10b13b14y5y7y8y10y11y12y14y15y16y18	302552	1666	169906358587853	129906358587853	0.0933	Green	18007	18088891	18088873	289288	17549	17549.00	2.03	2	9049482
NCDO2118_RS07185	pyruvate kinase 1499467:1500975 reverse MW:54255	Regular	14251120	0	543119936	67	13	33	39.44	188157	133014	19166	0	4	Pass1	PepFrag1	None	15347384	EFEVEAQNDGVIGK	EFEVEAQNDGVIGK	168	14	3.69	1241	7	7	1	1	14309580	63095		1395	3.6	b3b3b5b9*b12y2y3y7y8*y11*y12y13*	226358	1395	150941654454293	110941654454293	0.0576	Green	8682	15347430	15347434	207839	10829	10829.00	2.00	2	7678751
NCDO2118_RS07185	pyruvate kinase 1499467:1500975 reverse MW:54255	Regular	14251120	0	543119936	67	13	33	39.44	188157	133014	19166	0	5	Pass1	PepFrag1	None	26553294	IENQQGIENLDEIIEAADGIMIAR	IENQQGIENLDEIIEAADGIMIAR	250	24	3.43	1247	3	3	0	0	10540360	61767		208	2.5	b7b9y9y11	358436	2475	221212553895603	107475035930402	0.0122	Green	21780	26553313	26553261	355773	2294	2294.00	3.00	3	8857820
NCDO2118_RS07185	pyruvate kinase 1499467:1500975 reverse MW:54255	Regular	14251120	0	543119936	67	13	33	39.44	188157	133014	19166	0	6	Pass1	PepFrag1	None	8424730	GVNIPNTK	GVNIPNTK	184	8	10.10	1240	4	4	1	0	2739469	55915	Identified	937	1.6	b3b4b6y8	113130	787	103056674068113	166113348136225	0.0104	Yellow	1859	8424705	8424719	142840	1950	1950.00	1.00	1	8424705
NCDO2118_RS07185	pyruvate kinase 1499467:1500975 reverse MW:54255	Regular	14251120	0	543119936	67	13	33	39.44	188157	133014	19166	0	7	Pass1	PepFrag1	None	33417363	STPELIALNVAGGLDIFDDVEIGQTILIDDGK	STPELIALNVAGGLDIFDDVEIGQTILIDDGK	123	32	3.23	1245	3	3	0	0	6298550	59531	Missing	318	2.1	b7b8b9y10	458809	3154	260016411449035	133344274299357	0.0063	Green	23846	33417409	33417249	506701	1186	1186.00	3.00	3	11145852
NCDO2118_RS07185	pyruvate kinase 1499467:1500975 reverse MW:54255	Regular	14251120	0	543119936	67	13	33	39.44	188157	133014	19166	0	8	Pass1	PepFrag1	None	19318658	FGESGYWGESLDVEASAK	FGESGYWGESLDVEASAK	22	18	3.69	1242	2	2	0	0	3149576	56521		397	1.5	b12b15y6y11	279300	1718	17342368383482	13342368383482	0.0044	Yellow	17738	19318788	19318758	286253	829	829.00	2.00	2	9664430
NCDO2118_RS07185	pyruvate kinase 1499467:1500975 reverse MW:54255	Regular	14251120	0	543119936	67	13	33	39.44	188157	133014	19166	0	9	Pass2	PepFrag2	None	11906627	STVTEVVAASVK	STVTEVVAASVK	382	12	7.00	1252	0	0	0	0	1997106	54543		166	1.6	y8	191010	1130	131163177712208	911631777122084	0.0076	Yellow	6554	11906152	11906173	191045	1437	1437.00	2.00	2	5958112
NCDO2118_RS07185	pyruvate kinase 1499467:1500975 reverse MW:54255	Regular	14251120	0	543119936	67	13	33	39.44	188157	133014	19166	0	10	Pass2	MissedCleavage	None	22681475	IVVTATNMLESMTYNPRATR	IVVTATNMLESMTYNPRATR	302	20	9.84	1248	4	4	1	1	4049467	57612	Missing	288	2.6	b12b19y8y10y11	269991	2113	199079236075698	927194907171321	0.0177	Green	16440	22681220	22681211	272935	3335	3335.00	3.00	3	7567122
NCDO2118_RS07185	pyruvate kinase 1499467:1500975 reverse MW:54255	Regular	14251120	0	543119936	67	13	33	39.44	188157	133014	19166	0	11	Pass2	VarMod	Oxidation M(*);Phosphoryl STY(*)	13316024	ESVRTMATVNK	ESVRTMATVNK	352	11	10.12	1250	1	1	0	0	2048477	54653		194	3.7	b2-H3PO4b5-H3PO4b6y5y10	132768	1148	132552389034328	925523890343285	0.0820	Yellow	14040	13316002	13316018	251001	15422	15422.00	2.00	2	6663038
NCDO2118_RS07185	pyruvate kinase 1499467:1500975 reverse MW:54255	Regular	14251120	0	543119936	67	13	33	39.44	188157	133014	19166	0	12	Pass2	VarMod	Phosphoryl STY(13)	16768142	YDKSTVTEVVAASVK	YDKSTVTEVVAASVK	379	15	6.95	1251	1	1	0	0	712988	50069		105	4.0	b4b5y3	204902	1497	158212515050309	391062575251544	0.0742	Red	3702	16768046	16768046	165538	13966	13966.00	4.00	4	4199566
NCDO2118_RS07185	pyruvate kinase 1499467:1500975 reverse MW:54255	Regular	14251120	0	543119936	67	13	33	39.44	188157	133014	19166	0	13	Pass2	VarMod	Phosphoryl STY(10)	12706290	STVTEVVAASVK	STVTEVVAASVK	382	12	7.00	1249	2	2	1	0	2239363	55040		333	2.3	b11y8y9	191010	1130	131163177712208	911631777122084	0.0207	Yellow	10451	12706330	12706348	220857	3895	3895.00	2.00	2	6358201
NCDO2118_RS07185	pyruvate kinase 1499467:1500975 reverse MW:54255	Regular	27057500	0	543119936	125	20	33	50.40	309317	63726	44803	1	1	Pass1	PepFrag1	None	17399075	HRPNADILAITFDEK	HRPNADILAITFDEK	420	15	5.28	836	3	3	0	1	12024250	65123	Missing	2002	4.8	b6y7y9	296848	1612	166214787680525	708098584536835	0.0764	Green	20318	17399011	17399048	337131	23635	23635.00	3.00	3	5806386
NCDO2118_RS07185	pyruvate kinase 1499467:1500975 reverse MW:54255	Regular	27057500	0	543119936	125	20	33	50.40	309317	63726	44803	0	2	Pass1	PepFrag1	None	26553294	IENQQGIENLDEIIEAADGIMIAR	IENQQGIENLDEIIEAADGIMIAR	250	24	3.43	834	19	19	11	3	202709000	77392		7785	5.5	b2b3b6b6b7b7*b9*b10b11b12b13b13b14y2y4y5y7y8y9y10y11y13y24	373905	2475	221212553895603	107475035930402	0.0665	Green	23577	26553359	26553321	383217	20570	20570.00	2.82	3	8857835
NCDO2118_RS07185	pyruvate kinase 1499467:1500975 reverse MW:54255	Regular	27057500	0	543119936	125	20	33	50.40	309317	63726	44803	0	3	Pass1	PepFrag1	None	11906627	STVTEVVAASVK	STVTEVVAASVK	382	12	7.00	827	11	11	6	1	140802700	75809		5819	4.2	b2b2b3b4b4b6b12y3y4y5y6y7y8y9y12	201517	1130	131163177712208	911631777122084	0.0631	Green	7734	11906610	11906622	225498	19521	19521.00	1.96	2	5958341
NCDO2118_RS07185	pyruvate kinase 1499467:1500975 reverse MW:54255	Regular	27057500	0	543119936	125	20	33	50.40	309317	63726	44803	0	4	Pass1	PepFrag1	None	18088913	TELFADGADAISVVTGDK	TELFADGADAISVVTGDK	95	18	3.50	829	17	17	8	3	156751000	76275		4675	4.7	b2b3b4b5b5b6b8b10b10b11y3y4y5y7y9y11y12y15y16y18	310818	1666	169906358587853	129906358587853	0.0579	Green	18988	18088979	18088960	322487	17914	17914.00	2.04	2	9049526
NCDO2118_RS07185	pyruvate kinase 1499467:1500975 reverse MW:54255	Regular	27057500	0	543119936	125	20	33	50.40	309317	63726	44803	0	5	Pass1	PepFrag1	None	16988810	IPFPALAERDDADIR	IPFPALAERDDADIR	192	15	3.97	828	7	7	1	0	52620760	71534	Identified	3987	4.0	b2b15y2y9y12y13y14y14y15	267783	1566	163037487006469	686916580043129	0.0438	Green	13361	16988753	16988792	271418	13561	13561.00	2.96	3	5669633
NCDO2118_RS07185	pyruvate kinase 1499467:1500975 reverse MW:54255	Regular	27057500	0	543119936	125	20	33	50.40	309317	63726	44803	0	6	Pass1	PepFrag1	None	5733970	LIISK	LIISK	291	5	10.10	835	7	7	5	2	335770000	79583		2032	2.0	b2b3b4y2y2y3y3y4y5	146715	580	840836643499463	128167328699893	0.0372	Green	1447	5733956	5733968	150074	11496	11496.00	1.00	1	5733956
NCDO2118_RS07185	pyruvate kinase 1499467:1500975 reverse MW:54255	Regular	27057500	0	543119936	125	20	33	50.40	309317	63726	44803	0	7	Pass1	PepFrag1	None	24643770	VALASGLVESGDNIIIVAGVPVGTGR	VALASGLVESGDNIIIVAGVPVGTGR	466	26	4.07	831	10	10	7	1	45803360	70932	Identified	3847	4.5	b9b13b14b15b16y6y7y8y9y10	362826	2359	214245443756502	102830295837668	0.0366	Green	22594	24643649	24643632	368717	11307	11307.00	2.86	3	8221265
NCDO2118_RS07185	pyruvate kinase 1499467:1500975 reverse MW:54255	Regular	27057500	0	543119936	125	20	33	50.40	309317	63726	44803	0	8	Pass1	PepFrag1	None	15987095	FNFSHGDHPEQGAR	FNFSHGDHPEQGAR	54	14	6.02	825	4	4	1	0	3976995	60318	Identified	460	2.7	b3y4y6y7y10*y13*	141595	1390	150580765645106	603871770967373	0.0164	Green	2095	15986953	15986996	164079	5058	5058.00	3.00	3	5335700
NCDO2118_RS07185	pyruvate kinase 1499467:1500975 reverse MW:54255	Regular	27057500	0	543119936	125	20	33	50.40	309317	63726	44803	0	9	Pass1	PepFrag1	None	15168118	NIAALIEEGANVFR	NIAALIEEGANVFR	40	14	4.26	830	2	2	0	1	4924274	61246		1643	2.7	b3b10*y11y14*	316869	1419	152667958378682	112667958378682	0.0158	Green	20885	15168004	15168003	343749	4898	4898.00	2.00	2	7589039
NCDO2118_RS07185	pyruvate kinase 1499467:1500975 reverse MW:54255	Regular	27057500	0	543119936	125	20	33	50.40	309317	63726	44803	0	10	Pass1	PepFrag1	None	15347384	EFEVEAQNDGVIGK	EFEVEAQNDGVIGK	168	14	3.69	826	5	5	1	1	7999984	63354		763	2.2	b3y5y8y10y11	247218	1395	150941654454293	110941654454293	0.0099	Green	5671	15347458	15347455	207300	3050	3050.00	2.00	2	7678765
NCDO2118_RS07185	pyruvate kinase 1499467:1500975 reverse MW:54255	Regular	27057500	0	543119936	125	20	33	50.40	309317	63726	44803	0	11	Pass1	PepFrag1	Carbamidomethyl C(2)	17088687	ICEETGNPHVQLLAK	ICEETGNPHVQLLAK	235	15	5.30	833	2	2	0	0	2526335	58348	Missing	106	1.7	b2b8	224228	1542	161367430379895	6757828691993	0.0043	Yellow	7251	17088661	17088699	221381	1332	1332.00	3.00	3	5702935
NCDO2118_RS07185	pyruvate kinase 1499467:1500975 reverse MW:54255	Regular	27057500	0	543119936	125	20	33	50.40	309317	63726	44803	0	12	Pass2	PepFrag2	None	8424730	GVNIPNTK	GVNIPNTK	184	8	10.10	832	2	2	0	0	11596150	64966	Identified	190	1.2	b3y4	110208	787	103056674068113	166113348136225	0.0031	Green	1267	8424806	8424816	142366	945	945.00	1.00	1	8424806
NCDO2118_RS07185	pyruvate kinase 1499467:1500975 reverse MW:54255	Regular	27057500	0	543119936	125	20	33	50.40	309317	63726	44803	0	13	Pass2	MissedCleavage	None	21341060	STVTEVVAASVKNAAEAMDIK	STVTEVVAASVKNAAEAMDIK	382	21	4.44	837	1	1	0	0	3800496	60121		936	3.9	y5y13y17*y21	264190	2010	19255597788594	883706519239597	0.0293	Green	13382	21341032	21341045	271673	9060	9060.00	2.87	3	7120393
NCDO2118_RS07185	pyruvate kinase 1499467:1500975 reverse MW:54255	Regular	27057500	0	543119936	125	20	33	50.40	309317	63726	44803	0	14	Pass2	MissedCleavage	None	21241196	HRPNADILAITFDEKVER	HRPNADILAITFDEKVER	420	18	5.39	838	2	2	0	0	2073448	57490	Missing	145	2.3	b8b15y7	293728	1974	190249883608855	150249883608855	0.0085	Yellow	23485	21241213	21241167	382298	2621	2621.00	2.00	2	10625643
NCDO2118_RS07185	pyruvate kinase 1499467:1500975 reverse MW:54255	Regular	27057500	0	543119936	125	20	33	50.40	309317	63726	44803	0	15	Pass2	VarMod	Phosphoryl STY(*)	26313330	FGLSQPGGINFIAISFVRTANDVK	FGLSQPGGINFIAISFVRTANDVK	207	24	10.12	843	3	3	0	0	4333547	60691	Missing	1829	9.5	b10*b21y12y12*y20y20*y24	364456	2398	216600316407505	104400210938337	0.3029	Green	21451	26313302	26313268	350856	93700	93700.00	2.64	3	8777816
NCDO2118_RS07185	pyruvate kinase 1499467:1500975 reverse MW:54255	Regular	27057500	0	543119936	125	20	33	50.40	309317	63726	44803	0	16	Pass2	VarMod	Phosphoryl STY(*)	12706290	STVTEVVAASVK	STVTEVVAASVK	382	12	7.00	841	4	4	0	0	6626718	62536		721	5.9	b8y5y9y12	201517	1130	131163177712208	911631777122084	0.1615	Green	4697	12706323	12706333	196731	49963	49963.00	1.99	2	6358198
NCDO2118_RS07185	pyruvate kinase 1499467:1500975 reverse MW:54255	Regular	27057500	0	543119936	125	20	33	50.40	309317	63726	44803	0	17	Pass2	VarMod	Oxidation M(21)	26713243	IENQQGIENLDEIIEAADGIMIAR	IENQQGIENLDEIIEAADGIMIAR	250	24	3.43	839	16	16	10	3	57955560	71954		6135	4.7	b2b5b6b7b12b12b13b13*b14b17y4y6y7y8y9y10y10y11y12y19*y24	373905	2475	221212553895603	107475035930402	0.0452	Green	24043	26713269	26713229	393619	13966	13966.00	2.86	3	8911138
NCDO2118_RS07185	pyruvate kinase 1499467:1500975 reverse MW:54255	Regular	27057500	0	543119936	125	20	33	50.40	309317	63726	44803	0	18	Pass2	VarMod	Oxidation M(11)	19549289	GDMGIEVPFEMVPVYQK	GDMGIEVPFEMVPVYQK	274	17	3.83	840	4	4	1	1	21681250	67684	Identified	705	2.2	b12y5y6y10y17	359448	1797	178700191922053	138700191922053	0.0077	Green	20647	19549346	19549315	340548	2368	2368.00	2.00	2	9779710
NCDO2118_RS07185	pyruvate kinase 1499467:1500975 reverse MW:54255	Regular	27057500	0	543119936	125	20	33	50.40	309317	63726	44803	0	19	Pass2	VarMod	Phosphoryl STY(10)	12706290	STVTEVVAASVK	STVTEVVAASVK	382	12	7.00	842	4	4	0	1	2869935	58902		716	1.7	b2b4y1y8y11	201517	1130	131163177712208	911631777122084	0.0054	Green	8089	12706336	12706345	228685	1675	1675.00	2.00	2	6358204
NCDO2118_RS07185	pyruvate kinase 1499467:1500975 reverse MW:54255	Regular	27057500	0	543119936	125	20	33	50.40	309317	63726	44803	0	20	Pass2	VarMod	Phosphoryl STY(*)	23481138	IVVTATNMLESMTYNPRATR	IVVTATNMLESMTYNPRATR	302	20	9.84	844	0	0	0	0	849009	53612	Missing	110	1.6	b17*y9*b10-H3PO4	239382	2113	199079236075698	159079236075698	0.0027	Yellow	21594	23481034	23480965	353121	849	849.00	2.00	2	11745553
NCDO2118_RS07185	pyruvate kinase 1499467:1500975 reverse MW:54255	Regular	27057500	0	543119936	125	20	33	50.40	309317	63726	44803	0	21	Pass2	InSource	None	4603130	IISK	LIISK	292	4	10.10	835	2	2	0	0	1433737	0.0000		197	0.0	y2y2y4	146715	456	716258071901743	103251614380349	0.0059	Green	1448	4603094	4603106	150076	1828	1828.00	1.00	1	4603094
NCDO2118_RS07185	pyruvate kinase 1499467:1500975 reverse MW:54255	Regular	260976400	0	543119936	305	29	33	69.32	3000160	1796251	1795453	1	1	Pass1	PepFrag1	None	19399616	IVVTATNMLESMTYNPR	IVVTATNMLESMTYNPR	302	17	7.00	10	30	30	26	13	2590160000	98299	Identified	254557	17.5	b2b3b4b4b5b5b6b6b7b7b8b8b9b9b10b11b11b12b12b14b14b15b15*b15b16b17y2y3y3*y4y5y5y6y7y7*y8y8y9y9*y10y10y11y11y12y12y13y13y14y15y15y16y17	301859	1805	179230165172554	139230165172554	0.2334	Green	26060	19399609	19399602	314610	700124	700124.00	2.29	2	9704841
NCDO2118_RS07185	pyruvate kinase 1499467:1500975 reverse MW:54255	Regular	260976400	0	543119936	305	29	33	69.32	3000160	1796251	1795453	0	2	Pass1	PepFrag1	None	24643770	VALASGLVESGDNIIIVAGVPVGTGR	VALASGLVESGDNIIIVAGVPVGTGR	466	26	4.07	12	35	35	28	9	674812900	92458	Identified	381572	20.1	b2b3b4b5b5b6b6b7b7b9b10b10b11b12b13b14b15b15b16b16*b16b18b18b19b20b26y1y2y3y4y4y5y6y7y7y8y8y9y9y10y10y11y12y16y17y17y18y19y26	404733	2359	214245443756502	102830295837668	0.2255	Green	37888	24643821	24643809	362345	676548	676548.00	2.62	3	8221322
NCDO2118_RS07185	pyruvate kinase 1499467:1500975 reverse MW:54255	Regular	260976400	0	543119936	305	29	33	69.32	3000160	1796251	1795453	0	3	Pass1	PepFrag1	None	8925138	VGFLLDTK	VGFLLDTK	82	8	6.78	8	13	13	10	5	986231100	94106		239420	8.0	b2b3b4b5b6b6b7b8y2y2y3y4y4y5y5y6y6y7y7y8	247794	855	108910656856658	177821313713317	0.1399	Green	10785	8925131	8925151	251337	419579	419579.00	1.00	1	8925131
NCDO2118_RS07185	pyruvate kinase 1499467:1500975 reverse MW:54255	Regular	260976400	0	543119936	305	29	33	69.32	3000160	1796251	1795453	0	4	Pass1	PepFrag1	None	31264832	GLMINWGVIPTMTEKPSSTDDMFEVAEK	GLMINWGVIPTMTEKPSSTDDMFEVAEK	438	28	3.92	13	20	20	13	7	479793400	90977	Identified	270571	16.6	b3b5b5*b6b6*b7b7*b8b8*b9b9*b14b15b28*y13y15y16y19y20y21y22y23y24y25y26y28y28*	432222	2895	245579444639063	123719629759375	0.1236	Green	42283	31264873	31264792	381792	370780	370780.00	2.94	3	10428339
NCDO2118_RS07185	pyruvate kinase 1499467:1500975 reverse MW:54255	Regular	260976400	0	543119936	305	29	33	69.32	3000160	1796251	1795453	0	5	Pass1	PepFrag1	None	15168118	NIAALIEEGANVFR	NIAALIEEGANVFR	40	14	4.26	14	25	25	22	12	655877300	92334		96539	11.2	b2b2*b3b3*b4b4*b5b5*b6b6*b7b7*b8b9b10b11b11*b11b12b13y1y2y3y4y5y6y7y7*y8y8y9y9y10y10*y11y12y14y14*	340005	1419	152667958378682	112667958378682	0.0842	Green	44920	15168093	15168108	395266	252468	252468.00	2.07	2	7589083
NCDO2118_RS07185	pyruvate kinase 1499467:1500975 reverse MW:54255	Regular	260976400	0	543119936	305	29	33	69.32	3000160	1796251	1795453	0	6	Pass1	PepFrag1	None	13447482	LIVALTESGNTAR	LIVALTESGNTAR	403	13	7.00	20	22	22	19	9	1107196000	94608		406207	8.7	b2b3b4b5b6b6b7b7b8b8b9b9b10b11*b12b13y2y3y4y4*y5y6y6y7y7y8y8y9y9y10y10y11y11y12y13	229402	1271	141858926121739	101858926121739	0.0455	Green	5554	13447492	13447512	221735	136489	136489.00	1.83	2	6728782
NCDO2118_RS07185	pyruvate kinase 1499467:1500975 reverse MW:54255	Regular	260976400	0	543119936	305	29	33	69.32	3000160	1796251	1795453	0	7	Pass1	PepFrag1	Carbamidomethyl C(2)	17088687	ICEETGNPHVQLLAK	ICEETGNPHVQLLAK	235	15	5.30	5	21	21	18	7	635908700	92200	Identified	31569	7.9	b2b3b4b10b11b11*b12b13y2y3y4y5y6y7y8y9y10y11y11*y12y12*y12y13y13y14y14y15	186945	1542	161367430379895	6757828691993	0.0305	Green	1983	17088590	17088624	186129	91494	91494.00	2.87	3	5702912
NCDO2118_RS07185	pyruvate kinase 1499467:1500975 reverse MW:54255	Regular	260976400	0	543119936	305	29	33	69.32	3000160	1796251	1795453	0	8	Pass1	PepFrag1	None	19230487	FGLSQPGGINFIAISFVR	FGLSQPGGINFIAISFVR	207	18	11.05	15	16	16	9	6	250321900	88151	Identified	30842	7.1	b4b4b5b5b10b10b11b12b14b15b16y4y6y7y8y11*y12y13y14y15y16y18y18*	413627	1811	179627131410996	139627131410996	0.0184	Green	47201	19230534	19230528	420718	55243	55243.00	2.11	2	9620303
NCDO2118_RS07185	pyruvate kinase 1499467:1500975 reverse MW:54255	Regular	260976400	0	543119936	305	29	33	69.32	3000160	1796251	1795453	0	9	Pass1	PepFrag1	None	26553294	IENQQGIENLDEIIEAADGIMIAR	IENQQGIENLDEIIEAADGIMIAR	250	24	3.43	16	23	23	16	3	319661000	89213		18000	7.1	b2b4b5b6b7b7*b8b8b10b11b12*b12b13b13b14b14b15b15*y1y2y4y5y6y7y8y9y10y11y12y24	423115	2475	221212553895603	107475035930402	0.0143	Green	49750	26553347	26553319	441938	42889	42889.00	2.81	3	8857831
NCDO2118_RS07185	pyruvate kinase 1499467:1500975 reverse MW:54255	Regular	260976400	0	543119936	305	29	33	69.32	3000160	1796251	1795453	0	10	Pass1	PepFrag1	None	19389340	GDMGIEVPFEMVPVYQK	GDMGIEVPFEMVPVYQK	274	17	3.83	11	8	8	1	3	83923510	83405	Identified	10933	5.0	b4b5b7b7b12y5y5*y10y12y17	392047	1797	178700191922053	138700191922053	0.0075	Green	36816	19389370	19389363	358173	22517	22517.00	2.00	2	9699721
NCDO2118_RS07185	pyruvate kinase 1499467:1500975 reverse MW:54255	Regular	260976400	0	543119936	305	29	33	69.32	3000160	1796251	1795453	0	11	Pass1	PepFrag1	None	17399075	HRPNADILAITFDEK	HRPNADILAITFDEK	420	15	5.28	9	9	9	5	0	18461850	76829	Missing	4101	4.4	y1y2y3y5y7y8y9y11y12	243355	1612	166214787680525	708098584536835	0.0059	Green	23560	17399015	17399047	304478	17612	17612.00	2.79	3	5806387
NCDO2118_RS07185	pyruvate kinase 1499467:1500975 reverse MW:54255	Regular	260976400	0	543119936	305	29	33	69.32	3000160	1796251	1795453	0	12	Pass1	PepFrag1	None	11906627	STVTEVVAASVK	STVTEVVAASVK	382	12	7.00	6	5	5	1	0	18876060	76925		1660	3.7	b2b6b10y3y5y7y8y9	233240	1130	131163177712208	911631777122084	0.0047	Green	4821	11906635	11906658	216594	14094	14094.00	2.00	2	5958354
NCDO2118_RS07185	pyruvate kinase 1499467:1500975 reverse MW:54255	Regular	260976400	0	543119936	305	29	33	69.32	3000160	1796251	1795453	0	13	Pass1	PepFrag1	None	10135778	IPFPALAER	IPFPALAER	192	9	7.00	19	2	2	0	0	9431882	73912	Identified	452	3.2	b3y3y8	232838	954	117163377846316	771633778463164	0.0041	Green	15600	10135737	10135762	273291	12152	12152.00	2.00	2	5072905
NCDO2118_RS07185	pyruvate kinase 1499467:1500975 reverse MW:54255	Regular	260976400	0	543119936	305	29	33	69.32	3000160	1796251	1795453	0	14	Pass1	PepFrag1	None	7884876	LGLSLTGK	LGLSLTGK	155	8	10.10	18	2	2	0	0	14042910	75641		1010	2.5	y5y7	167838	769	101479237201927	614792372019271	0.0025	Green	4350	7884842	7884867	213353	7438	7438.00	2.00	2	3947457
NCDO2118_RS07185	pyruvate kinase 1499467:1500975 reverse MW:54255	Regular	260976400	0	543119936	305	29	33	69.32	3000160	1796251	1795453	0	15	Pass1	PepFrag1	None	12547416	IVSTLGPAVEIR	IVSTLGPAVEIR	6	12	7.00	7	4	4	0	1	5152461	71286	Identified	1822	2.5	b4b5b5b8y1y6y7	264187	1210	137282932554542	972829325545422	0.0016	Green	10070	12547313	12547335	247424	4824	4824.00	2.00	2	6278693
NCDO2118_RS07185	pyruvate kinase 1499467:1500975 reverse MW:54255	Regular	260976400	0	543119936	305	29	33	69.32	3000160	1796251	1795453	0	16	Pass1	PepFrag1	None	33417363	STPELIALNVAGGLDIFDDVEIGQTILIDDGK	STPELIALNVAGGLDIFDDVEIGQTILIDDGK	123	32	3.23	17	3	3	0	0	19591140	77087	Missing	1795	2.7	b10*b16*b25y5y6y6y9*y10y13*y32	541192	3154	260016411449035	133344274299357	0.0008	Green	55359	33417375	33417266	507035	2262	2262.00	2.63	3	11145840
NCDO2118_RS07185	pyruvate kinase 1499467:1500975 reverse MW:54255	Regular	260976400	0	543119936	305	29	33	69.32	3000160	1796251	1795453	0	17	Pass2	MissedCleavage	None	22881915	NAAEAMDIKLIVALTESGNTAR	NAAEAMDIKLIVALTESGNTAR	394	22	4.44	24	2	2	0	0	4907777	71075		2347	3.9	b11b11b12y9y10*y12y22	344236	2151	201458953880691	943059692537937	0.0029	Green	28313	22882100	22882103	323943	8657	8657.00	2.95	3	7634082
NCDO2118_RS07185	pyruvate kinase 1499467:1500975 reverse MW:54255	Regular	260976400	0	543119936	305	29	33	69.32	3000160	1796251	1795453	0	18	Pass2	MissedCleavage	None	14627723	VGFLLDTKGPEMR	VGFLLDTKGPEMR	82	13	7.03	22	2	2	0	0	11315310	74703	Missing	427	1.4	y6y12	241753	1374	149423001520314	109423001520314	0.0003	Green	12782	14627676	14627692	261469	985	985.00	2.00	2	7318874
NCDO2118_RS07185	pyruvate kinase 1499467:1500975 reverse MW:54255	Regular	260976400	0	543119936	305	29	33	69.32	3000160	1796251	1795453	0	19	Pass2	MissedCleavage	None	31444790	SEISDVFNAVIDGTDATMLSGESANGKYPR	SEISDVFNAVIDGTDATMLSGESANGKYPR	322	30	3.86	23	3	3	0	0	4865604	71037	Missing	383	1.9	b10*y4y9y16	355144	2861	243652874528969	122435249685979	0.0003	Green	41537	31444759	31444677	378274	864	864.00	3.00	3	10488302
NCDO2118_RS07185	pyruvate kinase 1499467:1500975 reverse MW:54255	Regular	260976400	0	543119936	305	29	33	69.32	3000160	1796251	1795453	0	20	Pass2	MissedCleavage	None	30965035	NIAALIEEGANVFRFNFSHGDHPEQGAR	NIAALIEEGANVFRFNFSHGDHPEQGAR	40	28	5.26	21	1	1	0	0	1437751	65743	Missing	225	1.7	b19y7	308707	2809	240691522273224	803457611366118	0.0003	Green	25989	30964897	30964892	314415	755	755.00	4.00	4	7748779
NCDO2118_RS07185	pyruvate kinase 1499467:1500975 reverse MW:54255	Regular	260976400	0	543119936	305	29	33	69.32	3000160	1796251	1795453	0	21	Pass2	VarMod	Phosphoryl STY(15)	26313330	FGLSQPGGINFIAISFVRTANDVK	FGLSQPGGINFIAISFVRTANDVK	207	24	10.12	29	8	8	2	0	8633539	73528	Identified	12133	5.8	b3b7*b9b14b18b20y5y5*y7*y9y10y12y12y13y14y19y21	380232	2398	216600316407505	176600316407505	0.0079	Green	33470	26313359	26313294	344285	23800	23800.00	2.38	2	13161716
NCDO2118_RS07185	pyruvate kinase 1499467:1500975 reverse MW:54255	Regular	260976400	0	543119936	305	29	33	69.32	3000160	1796251	1795453	0	22	Pass2	VarMod	Phosphoryl STY(24)	25443433	VALASGLVESGDNIIIVAGVPVGTGR	VALASGLVESGDNIIIVAGVPVGTGR	466	26	4.07	28	3	3	0	0	3402525	69484	Identified	184	5.8	b5y6y10	404733	2359	214245443756502	174245443756502	0.0075	Green	37303	25443650	25443594	360083	22563	22563.00	2.00	2	12726862
NCDO2118_RS07185	pyruvate kinase 1499467:1500975 reverse MW:54255	Regular	260976400	0	543119936	305	29	33	69.32	3000160	1796251	1795453	0	23	Pass2	VarMod	Phosphoryl STY(2)	12365521	EYGRLHPER	EYGRLHPER	370	9	7.77	30	2	2	0	0	2371695	67917	Missing	2461	3.3	b5y8y9	-12128	1035	123704795038989	837047950389888	0.0046	Green	28484	12365587	12365610	324791	13652	13652.00	2.00	2	6187830
NCDO2118_RS07185	pyruvate kinase 1499467:1500975 reverse MW:54255	Regular	260976400	0	543119936	305	29	33	69.32	3000160	1796251	1795453	0	24	Pass2	VarMod	Oxidation M(8)	19559565	IVVTATNMLESMTYNPR	IVVTATNMLESMTYNPR	302	17	7.00	26	11	11	4	0	14762870	75858	Identified	1853	3.4	b3b4b8b17y2y3y3*y4y5y7y12y17	301859	1805	179230165172554	139230165172554	0.0026	Green	10192	19559614	19559606	248100	7829	7829.00	2.23	2	9784843
NCDO2118_RS07185	pyruvate kinase 1499467:1500975 reverse MW:54255	Regular	260976400	0	543119936	305	29	33	69.32	3000160	1796251	1795453	0	25	Pass2	VarMod	Oxidation M(3)	31424781	GLMINWGVIPTMTEKPSSTDDMFEVAEK	GLMINWGVIPTMTEKPSSTDDMFEVAEK	438	28	3.92	27	4	4	0	0	2749760	68559	Identified	2188	3.7	b4b6b13b15*b19*b20*b28*y3y8y14y20y23	432222	2895	245579444639063	123719629759375	0.0021	Green	42265	31424936	31424854	381721	6201	6201.00	3.10	3	10481694
NCDO2118_RS07185	pyruvate kinase 1499467:1500975 reverse MW:54255	Regular	260976400	0	543119936	305	29	33	69.32	3000160	1796251	1795453	0	26	Pass2	VarMod	Phosphoryl STY(*);Phosphoryl STY(*)	57317749	GLMINWGVIPTMTEKPSSTDDMFEVAEKVALASGLVESGDNIIIVAGVPVGTGR	GLMINWGVIPTMTEKPSSTDDMFEVAEKVALASGLVESGDNIIIVAGVPVGTGR	438	54	3.96	32	1	1	0	0	1029578	64293	Missing	471	4.5	b13y17y19-H3PO4y27	402962	5254	365386933962884	142693466981442	0.0018	Green	43569	57318165	57317907	387777	5273	5273.00	4.00	4	14337096
NCDO2118_RS07185	pyruvate kinase 1499467:1500975 reverse MW:54255	Regular	260976400	0	543119936	305	29	33	69.32	3000160	1796251	1795453	0	27	Pass2	VarMod	Oxidation M(21)	26713243	IENQQGIENLDEIIEAADGIMIAR	IENQQGIENLDEIIEAADGIMIAR	250	24	3.43	25	4	4	0	0	2230517	67650		1538	1.9	b5b8b10b12b21y7y20	423115	2475	221212553895603	107475035930402	0.0004	Green	35847	26713362	26713332	354199	1144	1144.00	3.00	3	8911169
NCDO2118_RS07185	pyruvate kinase 1499467:1500975 reverse MW:54255	Regular	260976400	0	543119936	305	29	33	69.32	3000160	1796251	1795453	0	28	Pass2	VarMod	Phosphoryl STY(3)	9714492	TNTMRIR	TNTMRIR	492	7	12.40	33	1	1	0	0	1361965	65508		264	1.2	b2b2b3-H3PO4y6	16234	826	10643382394892	664338239489203	0.0003	Green	20275	9714499	9714525	292596	1024	1024.00	2.00	2	4862286
NCDO2118_RS07185	pyruvate kinase 1499467:1500975 reverse MW:54255	Regular	260976400	0	543119936	305	29	33	69.32	3000160	1796251	1795453	0	29	Pass2	VarMod	Oxidation M(6)	23041864	NAAEAMDIKLIVALTESGNTAR	NAAEAMDIKLIVALTESGNTAR	394	22	4.44	31	2	2	1	0	1868935	66882		483	1.7	b10b11b12b17	344236	2151	201458953880691	161458953880691	0.0003	Green	54193	23042040	23042006	491220	903	903.00	2.66	2	11526056
NCDO2118_RS07185	pyruvate kinase 1499467:1500975 reverse MW:54255	Regular	260976400	0	543119936	305	29	33	69.32	3000160	1796251	1795453	0	30	Pass2	InSource	None	6453606	VGFLLD	VGFLLDTK	82	6	3.10	8	3	3	1	0	22263700	0.0000		2476	0.0	b3b4b6y2y4y5	247794	627	885668763889684	137133752777937	0.0054	Green	10751	6453555	6453576	251178	16292	16292.00	1.00	1	6453555
NCDO2118_RS07185	pyruvate kinase 1499467:1500975 reverse MW:54255	Regular	260976400	0	543119936	305	29	33	69.32	3000160	1796251	1795453	0	31	Pass2	InSource	None	7424206	GVPVGTGR	VALASGLVESGDNIIIVAGVPVGTGR	484	8	11.05	12	3	3	0	0	1445175	0.0000	Missing	7437	0.0	b3y1y8	404733	685	939478145556335	147895629111267	0.0046	Green	37848	7424202	7424223	362171	13923	13923.00	1.00	1	7424202
NCDO2118_RS07185	pyruvate kinase 1499467:1500975 reverse MW:54255	Regular	260976400	0	543119936	305	29	33	69.32	3000160	1796251	1795453	0	32	Pass2	InSource	None	5863307	PVGTGR	VALASGLVESGDNIIIVAGVPVGTGR	486	6	11.05	12	1	1	0	0	1148468	0.0000	Missing	45	0.0	b5	404733	532	793781042037651	11875620840753	0.0028	Green	37813	5863283	5863304	362060	8307	8307.00	1.00	1	5863283
NCDO2118_RS07185	pyruvate kinase 1499467:1500975 reverse MW:54255	Regular	260976400	0	543119936	305	29	33	69.32	3000160	1796251	1795453	0	33	Pass2	InSource	None	6503257	TYNPR	IVVTATNMLESMTYNPR	314	5	9.84	10	1	1	0	0	5059027	0.0000	Identified	65	0.0	b3b3	301859	568	829198532217113	125839706443423	0.0020	Green	26015	6503238	6503259	314497	6079	6079.00	1.00	1	6503238
NCDO2118_RS07185	pyruvate kinase 1499467:1500975 reverse MW:54255	Regular	260976400	0	543119936	305	29	33	69.32	3000160	1796251	1795453	0	34	Pass2	InSource	None	9974408	ESMTYNPR	IVVTATNMLESMTYNPR	311	8	7.00	10	1	1	0	0	5097941	0.0000	Missing	3815	0.0	y5y8	301859	874	110518230443205	18103646088641	0.0019	Green	26025	9974429	9974447	314517	5609	5609.00	1.00	1	9974429
NCDO2118_RS07185	pyruvate kinase 1499467:1500975 reverse MW:54255	Regular	260976400	0	543119936	305	29	33	69.32	3000160	1796251	1795453	0	35	Pass2	InSource	None	8134577	AGVPVGTGR	VALASGLVESGDNIIIVAGVPVGTGR	483	9	11.05	12	0	0	0	0	944015	0.0000	Missing	0	0.0		404733	752	999780958937454	159956191787491	0.0016	Green	37839	8134568	8134589	362135	4913	4913.00	1.00	1	8134568
NCDO2118_RS07185	pyruvate kinase 1499467:1500975 reverse MW:54255	Regular	260976400	0	543119936	305	29	33	69.32	3000160	1796251	1795453	0	36	Pass2	InSource	None	6633573	GANVFR	NIAALIEEGANVFR	48	6	11.05	14	2	2	0	0	1707427	0.0000		2877	0.0	b3b4*y6	340005	599	85910091671144	131820183342288	0.0016	Green	44929	6633540	6633561	395350	4907	4907.00	1.00	1	6633540
NCDO2118_RS07185	pyruvate kinase 1499467:1500975 reverse MW:54255	Regular	260976400	0	543119936	305	29	33	69.32	3000160	1796251	1795453	0	37	Pass2	InSource	None	5492780	YNPR	IVVTATNMLESMTYNPR	315	4	9.84	10	2	2	0	0	945899	0.0000	Identified	1637	0.0	b2b2*y4	301859	475	736018460525308	107203692105062	0.0013	Green	26019	5492787	5492808	314503	3876	3876.00	1.00	1	5492787
NCDO2118_RS07185	pyruvate kinase 1499467:1500975 reverse MW:54255	Regular	260976400	0	543119936	305	29	33	69.32	3000160	1796251	1795453	0	38	Pass2	InSource	None	6053002	SGNTAR	LIVALTESGNTAR	410	6	11.05	20	1	1	0	0	6447721	0.0000		68	0.0	y4y5*	229402	525	786802690734356	117360538146871	0.0011	Green	5559	6052988	6053009	221748	3156	3156.00	1.00	1	6052988
NCDO2118_RS07185	pyruvate kinase 1499467:1500975 reverse MW:54255	Regular	260976400	0	543119936	305	29	33	69.32	3000160	1796251	1795453	0	39	Pass2	InSource	None	5352987	NVFR	NIAALIEEGANVFR	50	4	11.05	14	3	3	1	0	13431880	0.0000		604	0.0	b4y2y3y4*	340005	484	74528642116772	109057284233544	0.0008	Green	44914	5352931	5352951	395209	2455	2455.00	1.00	1	5352931
NCDO2118_RS07185	pyruvate kinase 1499467:1500975 reverse MW:54255	Regular	260976400	0	543119936	305	29	33	69.32	3000160	1796251	1795453	0	40	Pass2	InSource	None	4172496	VGFL	VGFLLDTK	82	4	6.13	8	0	0	0	0	396611	0.0000		0	0.0		247794	412	669408328781834	938816657563668	0.0007	Green	10797	4172490	4172507	251363	2240	2240.00	1.00	1	4172490
NCDO2118_RS07185	pyruvate kinase 1499467:1500975 reverse MW:54255	Regular	260976400	0	543119936	305	29	33	69.32	3000160	1796251	1795453	0	41	Pass2	InSource	None	3631874	DTK	VGFLLDTK	87	3	6.78	8	1	1	0	0	91795	0.0000		76	0.0	y2	247794	319	564442997538284	728885995076569	0.0006	Green	10764	3631860	3631876	251258	1712	1712.00	1.00	1	3631860
NCDO2118_RS07185	pyruvate kinase 1499467:1500975 reverse MW:54255	Regular	260976400	0	543119936	305	29	33	69.32	3000160	1796251	1795453	0	42	Pass2	InSource	None	9214425	EEGANVFR	NIAALIEEGANVFR	46	8	4.26	14	2	2	0	0	192011	0.0000		107	0.0	b1y2	340005	817	105659286072213	656592860722132	0.0005	Green	44907	9214415	9214440	395134	1621	1621.00	2.00	2	4612244
NCDO2118_RS07185	pyruvate kinase 1499467:1500975 reverse MW:54255	Regular	260976400	0	543119936	305	29	33	69.32	3000160	1796251	1795453	0	43	Pass2	InSource	None	10256102	IVAGVPVGTGR	VALASGLVESGDNIIIVAGVPVGTGR	481	11	11.05	12	0	0	0	0	1335049	0.0000	Missing	0	0.0		404733	981	119363709156196	198727418312392	0.0005	Green	37841	10256095	10256112	362137	1485	1485.00	1.00	1	10256095
NCDO2118_RS07185	pyruvate kinase 1499467:1500975 reverse MW:54255	Regular	260976400	0	543119936	305	29	33	69.32	3000160	1796251	1795453	0	44	Pass2	InSource	None	5103650	LIVAL	LIVALTESGNTAR	403	5	6.13	20	1	1	0	0	2195629	0.0000		58	0.0	y4	229402	544	805673168821943	121134633764389	0.0005	Green	5569	5103652	5103671	221788	1438	1438.00	1.00	1	5103652
NCDO2118_RS07185	pyruvate kinase 1499467:1500975 reverse MW:54255	Regular	260976400	0	543119936	305	29	33	69.32	3000160	1796251	1795453	0	45	Pass2	InSource	None	7923999	EGANVFR	NIAALIEEGANVFR	47	7	7.00	14	1	1	0	0	1149878	0.0000		43	0.0	y4	340005	708	960391864878618	560391864878618	0.0004	Green	44915	7923915	7923940	395217	1198	1198.00	2.00	2	3966994
NCDO2118_RS07185	pyruvate kinase 1499467:1500975 reverse MW:54255	Regular	260976400	0	543119936	305	29	33	69.32	3000160	1796251	1795453	0	46	Pass2	InSource	None	9114833	NIAALIEEG	NIAALIEEGANVFR	40	9	3.13	14	1	1	0	0	792004	0.0000		138	0.0	b6b8*	340005	868	110011845688626	700118456886259	0.0003	Green	44911	9114803	9114828	395180	786	786.00	2.00	2	4562438
NCDO2118_RS07185	pyruvate kinase 1499467:1500975 reverse MW:54255	Regular	90008110	0	543119936	174	20	33	52.99	344911	235231	158369	1	1	Pass1	PepFrag1	None	24643770	VALASGLVESGDNIIIVAGVPVGTGR	VALASGLVESGDNIIIVAGVPVGTGR	466	26	4.07	57	38	38	32	13	692764100	87949	Identified	94539	11.6	b2b3b4b5b5b6b6b7b8b8b9b9b10b10b11b11b12b13b13*b13b14b14b15b15*b15b16b16b17b17b18b19b20b26y2y3y4y5y5y6y6y7y8y9y9y10y11y12y14y15y16y17y18y24y26	404316	2359	214245443756502	102830295837668	0.4344	Green	7111	24643812	24643802	368961	149844	149844.00	2.73	3	8221319
NCDO2118_RS07185	pyruvate kinase 1499467:1500975 reverse MW:54255	Regular	90008110	0	543119936	174	20	33	52.99	344911	235231	158369	0	2	Pass1	PepFrag1	None	13447482	LIVALTESGNTAR	LIVALTESGNTAR	403	13	7.00	52	16	16	10	6	327503400	84695		23253	6.1	b2b3b4b5b6b6b7b8b13y3y5y6y7y8y8y9y9y10y10y11y11y13	238780	1271	141858926121739	101858926121739	0.1480	Green	3890	13447527	13447537	229565	51047	51047.00	1.99	2	6728800
NCDO2118_RS07185	pyruvate kinase 1499467:1500975 reverse MW:54255	Regular	90008110	0	543119936	174	20	33	52.99	344911	235231	158369	0	3	Pass1	PepFrag1	Carbamidomethyl C(2)	17088687	ICEETGNPHVQLLAK	ICEETGNPHVQLLAK	235	15	5.30	50	17	17	12	5	262994100	83742	Identified	8750	5.6	b2b3b4b11b12y2y3y4y5y6y8y10y11y11*y12y12*y12y13y14y14*y15	211931	1542	161367430379895	6757828691993	0.0996	Green	3305	17088565	17088590	199435	34340	34340.00	2.91	3	5702903
NCDO2118_RS07185	pyruvate kinase 1499467:1500975 reverse MW:54255	Regular	90008110	0	543119936	174	20	33	52.99	344911	235231	158369	0	4	Pass1	PepFrag1	None	10135778	IPFPALAER	IPFPALAER	192	9	7.00	55	9	9	6	2	116227900	80196	Identified	11251	4.2	b2b3y1y4y5y6y7y8y9	256427	954	117163377846316	771633778463164	0.0788	Green	4751	10135705	10135724	274831	27196	27196.00	2.00	2	5072889
NCDO2118_RS07185	pyruvate kinase 1499467:1500975 reverse MW:54255	Regular	90008110	0	543119936	174	20	33	52.99	344911	235231	158369	0	5	Pass1	PepFrag1	None	19399616	IVVTATNMLESMTYNPR	IVVTATNMLESMTYNPR	302	17	7.00	56	22	22	12	7	660584600	87742	Identified	5387	4.7	b2b5b6b6b7b7b8b8*b8b9b10b11b12b15b17b17*y2y3y4y5y7y7y8y8*y9y9y11y12y13y14y15y17	320209	1805	179230165172554	139230165172554	0.0554	Green	5939	19399655	19399629	323073	19107	19107.00	2.44	2	9704864
NCDO2118_RS07185	pyruvate kinase 1499467:1500975 reverse MW:54255	Regular	90008110	0	543119936	174	20	33	52.99	344911	235231	158369	0	6	Pass1	PepFrag1	None	15168118	NIAALIEEGANVFR	NIAALIEEGANVFR	40	14	4.26	59	14	14	11	6	70390050	78018		3159	3.1	b2b3b4b5b5*b6b7b8b8*b11*b12y6y7y8y8*y9y10y11y14	357021	1419	152667958378682	112667958378682	0.0220	Green	8197	15168170	15168172	410043	7592	7592.00	2.10	2	7589121
NCDO2118_RS07185	pyruvate kinase 1499467:1500975 reverse MW:54255	Regular	90008110	0	543119936	174	20	33	52.99	344911	235231	158369	0	7	Pass1	PepFrag1	None	8925138	VGFLLDTK	VGFLLDTK	82	8	6.78	54	6	6	4	0	109107600	79921		1395	2.3	y2y4y5y6y7y8	266046	855	108910656856658	689106568566584	0.0158	Green	4519	8925106	8925127	263152	5460	5460.00	1.79	2	4467589
NCDO2118_RS07185	pyruvate kinase 1499467:1500975 reverse MW:54255	Regular	90008110	0	543119936	174	20	33	52.99	344911	235231	158369	0	8	Pass1	PepFrag1	None	12547416	IVSTLGPAVEIR	IVSTLGPAVEIR	6	12	7.00	53	7	7	4	2	76103740	78357	Identified	1603	2.5	b2b4b4y6y7y8y9y10	272368	1210	137282932554542	972829325545422	0.0139	Green	4320	12547385	12547399	251520	4801	4801.00	2.00	2	6278729
NCDO2118_RS07185	pyruvate kinase 1499467:1500975 reverse MW:54255	Regular	90008110	0	543119936	174	20	33	52.99	344911	235231	158369	0	9	Pass1	PepFrag1	None	26553294	IENQQGIENLDEIIEAADGIMIAR	IENQQGIENLDEIIEAADGIMIAR	250	24	3.43	61	8	8	5	0	15017070	71309		725	2.9	b5b8y6y7y8y9y10y11y13	415229	2475	221212553895603	107475035930402	0.0106	Green	8805	26553385	26553360	445145	3661	3661.00	3.00	3	8857843
NCDO2118_RS07185	pyruvate kinase 1499467:1500975 reverse MW:54255	Regular	90008110	0	543119936	174	20	33	52.99	344911	235231	158369	0	10	Pass1	PepFrag1	None	7884876	LGLSLTGK	LGLSLTGK	155	8	10.10	51	3	3	0	0	5915959	67263		468	1.8	y3y5y7	175616	769	101479237201927	614792372019271	0.0081	Yellow	3709	7884829	7884850	221563	2779	2779.00	2.00	2	3947451
NCDO2118_RS07185	pyruvate kinase 1499467:1500975 reverse MW:54255	Regular	90008110	0	543119936	174	20	33	52.99	344911	235231	158369	0	11	Pass1	PepFrag1	None	31264832	GLMINWGVIPTMTEKPSSTDDMFEVAEK	GLMINWGVIPTMTEKPSSTDDMFEVAEK	438	28	3.92	58	3	3	0	0	70308370	78013	Identified	1618	2.8	y19y22y28y28*	399065	2895	245579444639063	123719629759375	0.0079	Green	7773	31265040	31264974	394186	2710	2710.00	3.00	3	10428395
NCDO2118_RS07185	pyruvate kinase 1499467:1500975 reverse MW:54255	Regular	90008110	0	543119936	174	20	33	52.99	344911	235231	158369	0	12	Pass1	PepFrag1	None	19230487	FGLSQPGGINFIAISFVR	FGLSQPGGINFIAISFVR	207	18	11.05	60	4	4	0	1	41410220	75714	Identified	1262	2.2	b5b11y11*y13y15y18	418481	1811	179627131410996	139627131410996	0.0062	Green	8536	19230468	19230443	427172	2146	2146.00	2.00	2	9620270
NCDO2118_RS07185	pyruvate kinase 1499467:1500975 reverse MW:54255	Regular	90008110	0	543119936	174	20	33	52.99	344911	235231	158369	0	13	Pass1	PepFrag1	None	33417363	STPELIALNVAGGLDIFDDVEIGQTILIDDGK	STPELIALNVAGGLDIFDDVEIGQTILIDDGK	123	32	3.23	62	3	3	0	0	18748750	72273	Missing	570	2.1	b12*b13*b15y5y10y10*y11	515679	3154	260016411449035	133344274299357	0.0032	Green	9535	33417410	33417321	506588	1107	1107.00	3.00	3	11145852
NCDO2118_RS07185	pyruvate kinase 1499467:1500975 reverse MW:54255	Regular	90008110	0	543119936	174	20	33	52.99	344911	235231	158369	0	14	Pass2	PepFrag2	None	11906627	STVTEVVAASVK	STVTEVVAASVK	382	12	7.00	66	1	1	0	0	6086859	67387		35	2.7	y9	207466	1130	131163177712208	911631777122084	0.0177	Yellow	3343	11906467	11906482	201017	6113	6113.00	2.00	2	5958270
NCDO2118_RS07185	pyruvate kinase 1499467:1500975 reverse MW:54255	Regular	90008110	0	543119936	174	20	33	52.99	344911	235231	158369	0	15	Pass2	PepFrag2	None	13106521	NAQTMLKEYGR	NAQTMLKEYGR	363	11	9.72	68	0	0	0	0	3087260	64439		35	1.8	y5	144471	1199	136449649027853	964496490278527	0.0061	Yellow	1952	13106092	13106103	145548	2089	2089.00	2.00	2	6558082
NCDO2118_RS07185	pyruvate kinase 1499467:1500975 reverse MW:54255	Regular	90008110	0	543119936	174	20	33	52.99	344911	235231	158369	0	16	Pass2	PepFrag2	None	17399075	HRPNADILAITFDEK	HRPNADILAITFDEK	420	15	5.28	67	4	4	1	0	5722831	67119	Missing	181	1.6	b5b8y5y6	263591	1612	166214787680525	708098584536835	0.0033	Yellow	6540	17399065	17399089	347625	1148	1148.00	3.00	3	5806403
NCDO2118_RS07185	pyruvate kinase 1499467:1500975 reverse MW:54255	Regular	90008110	0	543119936	174	20	33	52.99	344911	235231	158369	0	17	Pass2	PepFrag2	None	9624612	NAAEAMDIK	NAAEAMDIK	394	9	4.07	69	1	1	0	0	848668	58830		42	1.3	b6	177300	880	111023457736826	710234577368262	0.0028	Red	1103	9624518	9624538	107412	967	967.00	2.00	2	4817295
NCDO2118_RS07185	pyruvate kinase 1499467:1500975 reverse MW:54255	Regular	90008110	0	543119936	174	20	33	52.99	344911	235231	158369	0	18	Pass2	VarMod	Phosphoryl STY(*)	18660096	LIVALTESGNTARLISK	LIVALTESGNTARLISK	403	17	10.12	65	2	2	0	0	1497324	61296		120	2.2	b3b13b12-H3PO4	288615	1727	1740288268534	1340288268534	0.0071	Yellow	5761	18660037	18660016	316299	2454	2454.00	2.12	2	9335055
NCDO2118_RS07185	pyruvate kinase 1499467:1500975 reverse MW:54255	Regular	90008110	0	543119936	174	20	33	52.99	344911	235231	158369	0	19	Pass2	VarMod	Phosphoryl STY(10)	12706290	STVTEVVAASVK	STVTEVVAASVK	382	12	7.00	64	1	1	0	0	2911836	64184		173	1.6	y6y11	207466	1130	131163177712208	911631777122084	0.0042	Yellow	3727	12706302	12706314	222225	1442	1442.00	2.00	2	6358187
NCDO2118_RS07185	pyruvate kinase 1499467:1500975 reverse MW:54255	Regular	90008110	0	543119936	174	20	33	52.99	344911	235231	158369	0	20	Pass2	VarMod	Oxidation M(8)	19559565	IVVTATNMLESMTYNPR	IVVTATNMLESMTYNPR	302	17	7.00	63	1	1	0	0	1387352	60965	Missing	238	1.7	b8*y6	320209	1805	179230165172554	794867767817027	0.0033	Yellow	5941	19559565	19559582	323120	1134	1134.00	2.56	3	6526570
NCDO2118_RS07185	pyruvate kinase 1499467:1500975 reverse MW:54255	Regular	90008110	0	543119936	174	20	33	52.99	344911	235231	158369	0	21	Pass2	InSource	None	17229636	VALASGLVESGDNIIIVA	VALASGLVESGDNIIIVAGVPVGTGR	466	18	3.01	57	5	5	2	0	6113479	0.0000		923	0.0	b4b7b7b8b9b13y8y15	404316	1674	170449842120481	130449842120481	0.0150	Green	7115	17229632	17229622	369046	5163	5163.00	2.00	2	8619852
NCDO2118_RS07185	pyruvate kinase 1499467:1500975 reverse MW:54255	Regular	90008110	0	543119936	174	20	33	52.99	344911	235231	158369	0	22	Pass2	InSource	None	6754036	GLSLTGK	LGLSLTGK	156	7	10.10	51	5	5	2	1	12918270	0.0000		607	0.0	b3b3y2y3y4y7	175616	645	902539276707172	140507855341434	0.0102	Yellow	3708	6754030	6754045	221519	3520	3520.00	1.00	1	6754030
NCDO2118_RS07185	pyruvate kinase 1499467:1500975 reverse MW:54255	Regular	90008110	0	543119936	174	20	33	52.99	344911	235231	158369	0	23	Pass2	InSource	None	7424206	GVPVGTGR	VALASGLVESGDNIIIVAGVPVGTGR	484	8	11.05	57	1	1	0	0	1879812	0.0000	Missing	1479	0.0	y8	404316	685	939478145556335	147895629111267	0.0080	Green	7120	7424202	7424217	369118	2774	2774.00	1.00	1	7424202
NCDO2118_RS07185	pyruvate kinase 1499467:1500975 reverse MW:54255	Regular	90008110	0	543119936	174	20	33	52.99	344911	235231	158369	0	24	Pass2	InSource	None	5863307	PVGTGR	VALASGLVESGDNIIIVAGVPVGTGR	486	6	11.05	57	1	1	0	0	1119965	0.0000	Missing	33	0.0	b6	404316	532	793781042037651	11875620840753	0.0058	Green	7114	5863308	5863323	369023	1995	1995.00	1.00	1	5863308
NCDO2118_RS07185	pyruvate kinase 1499467:1500975 reverse MW:54255	Regular	90008110	0	543119936	174	20	33	52.99	344911	235231	158369	0	25	Pass2	InSource	None	16519265	VALASGLVESGDNIIIV	VALASGLVESGDNIIIVAGVPVGTGR	466	17	3.01	57	0	0	0	0	3812507	0.0000		37	0.0	y12	404316	1607	165870906720833	125870906720833	0.0049	Green	7113	16519269	16519264	368998	1677	1677.00	2.00	2	8264671
NCDO2118_RS07185	pyruvate kinase 1499467:1500975 reverse MW:54255	Regular	90008110	0	543119936	174	20	33	52.99	344911	235231	158369	0	26	Pass2	InSource	None	8134577	AGVPVGTGR	VALASGLVESGDNIIIVAGVPVGTGR	483	9	11.05	57	0	0	0	0	1954281	0.0000	Missing	0	0.0		404316	752	999780958937454	159956191787491	0.0030	Green	7112	8134576	8134590	368996	1028	1028.00	1.00	1	8134576
NCDO2118_RS07185	pyruvate kinase 1499467:1500975 reverse MW:54255	Regular	90008110	0	543119936	174	20	33	52.99	344911	235231	158369	0	27	Pass2	InSource	None	15528581	VALASGLVESGDNIII	VALASGLVESGDNIIIVAGVPVGTGR	466	16	3.01	57	1	1	0	0	1527745	0.0000		161	0.0	y5y5y14*	404316	1502	15856460717578	11856460717578	0.0025	Green	7116	15528530	15528530	369066	862	862.00	2.00	2	7769301
NCDO2118_RS07185	pyruvate kinase 1499467:1500975 reverse MW:54255	Regular	90008110	0	543119936	174	20	33	52.99	344911	235231	158369	0	28	Pass2	InSource	None	6563726	PALAER	IPFPALAER	195	6	7.00	55	1	1	0	0	1313393	0.0000	Identified	325	0.0	y6	256427	605	86482828258383	132965656516766	0.0022	Green	4755	6563740	6563755	274868	755	755.00	1.00	1	6563740
NCDO2118_RS07185	pyruvate kinase 1499467:1500975 reverse MW:54255	Regular	32405670	0	543119936	43	7	33	25.10	115260	108592	40395	1	1	Pass1	PepFrag1	None	24643770	VALASGLVESGDNIIIVAGVPVGTGR	VALASGLVESGDNIIIVAGVPVGTGR	466	26	4.07	234	30	30	23	8	606963600	82938	Identified	38083	9.6	b2b3b4b5b5b6b6b7b7b8b8b9b12b13b13b14b14b15b15b16b17b18b20b26y4y5y6y7y8y9y10y11y12y16y17y18y26	395062	2359	214245443756502	102830295837668	0.7731	Green	12821	24643825	24643810	369142	89113	89113.00	2.85	3	8221323
NCDO2118_RS07185	pyruvate kinase 1499467:1500975 reverse MW:54255	Regular	32405670	0	543119936	43	7	33	25.10	115260	108592	40395	0	2	Pass1	PepFrag1	None	15347384	EFEVEAQNDGVIGK	EFEVEAQNDGVIGK	168	14	3.69	232	2	2	1	0	5322596	62367		192	1.7	b10*y8y9y12	219953	1395	150941654454293	110941654454293	0.0118	Green	5793	15347421	15347418	207761	1361	1361.00	2.00	2	7678747
NCDO2118_RS07185	pyruvate kinase 1499467:1500975 reverse MW:54255	Regular	32405670	0	543119936	43	7	33	25.10	115260	108592	40395	0	3	Pass1	PepFrag1	None	10135778	IPFPALAER	IPFPALAER	192	9	7.00	233	3	3	2	0	18274580	67725	Identified	352	1.4	y6y7y8	257487	954	117163377846316	771633778463164	0.0107	Green	9855	10135730	10135745	273772	1229	1229.00	2.00	2	5072901
NCDO2118_RS07185	pyruvate kinase 1499467:1500975 reverse MW:54255	Regular	32405670	0	543119936	43	7	33	25.10	115260	108592	40395	0	4	Pass1	PepFrag1	None	33417363	STPELIALNVAGGLDIFDDVEIGQTILIDDGK	STPELIALNVAGGLDIFDDVEIGQTILIDDGK	123	32	3.23	235	2	2	0	0	3916535	61035	Missing	66	2.0	y8y12	486852	3154	260016411449035	133344274299357	0.0090	Green	14390	33417200	33417139	506683	1037	1037.00	3.00	3	11145782
NCDO2118_RS07185	pyruvate kinase 1499467:1500975 reverse MW:54255	Regular	32405670	0	543119936	43	7	33	25.10	115260	108592	40395	0	5	Pass2	PepFrag2	None	20489883	DAATREFEVEAQNDGVIGK	DAATREFEVEAQNDGVIGK	163	19	3.92	236	3	3	0	0	3010913	59893		769	4.6	b7y13y19	237018	1861	18291832518074	81945550120493	0.1421	Green	8686	20489694	20489694	252539	16384	16384.00	3.29	3	6836613
NCDO2118_RS07185	pyruvate kinase 1499467:1500975 reverse MW:54255	Regular	32405670	0	543119936	43	7	33	25.10	115260	108592	40395	0	6	Pass2	PepFrag2	None	11906627	STVTEVVAASVK	STVTEVVAASVK	382	12	7.00	237	0	0	0	0	2763511	59521		102	2.1	y3	203258	1130	131163177712208	911631777122084	0.0269	Green	4521	11906296	11906307	191438	3095	3095.00	2.00	2	5958184
NCDO2118_RS07185	pyruvate kinase 1499467:1500975 reverse MW:54255	Regular	32405670	0	543119936	43	7	33	25.10	115260	108592	40395	0	7	Pass2	PepFrag2	None	31264832	GLMINWGVIPTMTEKPSSTDDMFEVAEK	GLMINWGVIPTMTEKPSSTDDMFEVAEK	438	28	3.92	238	2	2	0	0	1139424	55673	Missing	150	2.0	b14y10	399965	2895	245579444639063	123719629759375	0.0099	Yellow	11407	31264068	31264020	309968	1136	1136.00	3.00	3	10428071
NCDO2118_RS07185	pyruvate kinase 1499467:1500975 reverse MW:54255	Regular	32405670	0	543119936	43	7	33	25.10	115260	108592	40395	0	8	Pass2	InSource	None	7424206	GVPVGTGR	VALASGLVESGDNIIIVAGVPVGTGR	484	8	11.05	234	1	1	0	0	2529826	0.0000	Missing	681	0.0	y8	395062	685	939478145556335	147895629111267	0.0094	Green	12820	7424188	7424200	369136	1084	1084.00	1.00	1	7424188
NCDO2118_RS07185	pyruvate kinase 1499467:1500975 reverse MW:54255	Regular	32405670	0	543119936	43	7	33	25.10	115260	108592	40395	0	9	Pass2	InSource	None	5863307	PVGTGR	VALASGLVESGDNIIIVAGVPVGTGR	486	6	11.05	234	0	0	0	0	619331	0.0000	Missing	0	0.0		395062	532	793781042037651	11875620840753	0.0071	Green	12817	5863299	5863312	369013	821	821.00	1.00	1	5863299
NCDO2118_RS07185	pyruvate kinase 1499467:1500975 reverse MW:54255	Regular	16638350	0	543119936	39	8	33	29.28	55425	42143	17724	1	1	Pass1	PepFrag1	None	24643770	VALASGLVESGDNIIIVAGVPVGTGR	VALASGLVESGDNIIIVAGVPVGTGR	466	26	4.07	373	24	24	19	6	314148400	77182	Identified	15298	7.1	b3b4b5b6b7b8b9b10b12b13b14b14*b15b15*b16b17b18b20y6y7y8y9y10y11y12y26	389695	2359	214245443756502	102830295837668	0.6931	Green	11609	24643769	24643746	368954	38413	38413.00	2.89	3	8221305
NCDO2118_RS07185	pyruvate kinase 1499467:1500975 reverse MW:54255	Regular	16638350	0	543119936	39	8	33	29.28	55425	42143	17724	0	2	Pass1	PepFrag1	None	13447482	LIVALTESGNTAR	LIVALTESGNTAR	403	13	7.00	372	6	6	2	0	8339189	61422		493	2.1	b2b4y6y7y8y12	253543	1271	141858926121739	101858926121739	0.0512	Green	5785	13447454	13447480	225405	2839	2839.00	2.00	2	6728764
NCDO2118_RS07185	pyruvate kinase 1499467:1500975 reverse MW:54255	Regular	16638350	0	543119936	39	8	33	29.28	55425	42143	17724	0	3	Pass1	PepFrag1	None	33417363	STPELIALNVAGGLDIFDDVEIGQTILIDDGK	STPELIALNVAGGLDIFDDVEIGQTILIDDGK	123	32	3.23	374	1	1	0	0	1472434	53891	Missing	46	1.9	y9	477110	3154	260016411449035	133344274299357	0.0161	Yellow	13125	33417471	33417308	506163	891	891.00	3.00	3	11145872
NCDO2118_RS07185	pyruvate kinase 1499467:1500975 reverse MW:54255	Regular	16638350	0	543119936	39	8	33	29.28	55425	42143	17724	0	4	Pass2	PepFrag2	None	20489883	DAATREFEVEAQNDGVIGK	DAATREFEVEAQNDGVIGK	163	19	3.92	379	0	0	0	0	1529834	54058		50	2.8	b7	243565	1861	18291832518074	81945550120493	0.0714	Yellow	7148	20489554	20489574	251803	3955	3955.00	3.00	3	6836567
NCDO2118_RS07185	pyruvate kinase 1499467:1500975 reverse MW:54255	Regular	16638350	0	543119936	39	8	33	29.28	55425	42143	17724	0	5	Pass2	MissedCleavage	None	15508029	TMATVNKNAQTMLK	TMATVNKNAQTMLK	356	14	10.60	376	2	2	0	0	2841743	56747		606	2.2	b8y14	205078	1466	15602072119427	640138141295132	0.0537	Yellow	7924	15507980	15508030	265155	2975	2975.00	2.66	3	5176042
NCDO2118_RS07185	pyruvate kinase 1499467:1500975 reverse MW:54255	Regular	16638350	0	543119936	39	8	33	29.28	55425	42143	17724	0	6	Pass2	MissedCleavage	None	22681475	IVVTATNMLESMTYNPRATR	IVVTATNMLESMTYNPRATR	302	20	9.84	375	2	2	0	0	992975	52180	Missing	157	2.1	b10*b12y7y9	315785	2113	199079236075698	927194907171321	0.0321	Yellow	8104	22681221	22681221	268513	1777	1777.00	3.00	3	7567122
NCDO2118_RS07185	pyruvate kinase 1499467:1500975 reverse MW:54255	Regular	16638350	0	543119936	39	8	33	29.28	55425	42143	17724	0	7	Pass2	VarMod	Oxidation M(*);Phosphoryl STY(*);Phosphoryl STY(*)	17267304	TMATVNKNAQTMLK	TMATVNKNAQTMLK	356	14	10.60	378	2	2	0	0	1925795	55057		731	1.9	b10y6-H3PO4y7y7y10y14	205078	1466	15602072119427	640138141295132	0.0330	Yellow	8353	17267319	17267361	273208	1829	1829.00	2.51	3	5762488
NCDO2118_RS07185	pyruvate kinase 1499467:1500975 reverse MW:54255	Regular	16638350	0	543119936	39	8	33	29.28	55425	42143	17724	0	8	Pass2	VarMod	Oxidation M(4);Phosphoryl STY(20)	24751109	GPEMRTELFADGADAISVVTGDK	GPEMRTELFADGADAISVVTGDK	90	23	3.86	377	2	2	0	0	1352972	53524	Missing	343	2.2	b7b12y7y9-H3PO4	342752	2185	203576321063382	95717547375588	0.0328	Yellow	8735	24751203	24751179	280045	1818	1818.00	3.00	3	8257116
NCDO2118_RS07185	pyruvate kinase 1499467:1500975 reverse MW:54255	Regular	16638350	0	543119936	39	8	33	29.28	55425	42143	17724	0	9	Pass2	InSource	Oxidation M(4)	13205889	GPEMRTELFADG	GPEMRTELFADGADAISVVTGDK	90	12	3.83	377	0	0	0	0	505908	0.0000	Missing	0	0.0		342752	1186	135461566497984	954615664979844	0.0167	Yellow	8720	13205970	13205996	279770	928	928.00	2.00	2	6608021
NCDO2118_RS07185	pyruvate kinase 1499467:1500975 reverse MW:54255	Regular	36723800	0	543119936	74	10	33	28.88	134983	113719	41656	1	1	Pass1	PepFrag1	Carbamidomethyl C(2)	17088687	ICEETGNPHVQLLAK	ICEETGNPHVQLLAK	235	15	5.30	208	20	20	16	5	496691800	82610	Identified	21538	7.1	b2b3b7b11*b11b12b12*b13y1y2y3y4y5y6y7y8y9y10y11y11*y12y12y13y13y14y14*y15y15*	203740	1542	161367430379895	6757828691993	0.5078	Green	2689	17088590	17088641	196830	68538	68538.00	2.88	3	5702912
NCDO2118_RS07185	pyruvate kinase 1499467:1500975 reverse MW:54255	Regular	36723800	0	543119936	74	10	33	28.88	134983	113719	41656	0	2	Pass1	PepFrag1	None	26553294	IENQQGIENLDEIIEAADGIMIAR	IENQQGIENLDEIIEAADGIMIAR	250	24	3.43	214	20	20	14	2	176192800	78109		6938	5.7	b4b5b6b6*b7b7*b8b10b12b12*b13b15y2y3y4y5y6y7y8y9y10y11y13	377596	2475	221212553895603	107475035930402	0.1684	Green	13116	26553330	26553294	444248	22729	22729.00	2.99	3	8857825
NCDO2118_RS07185	pyruvate kinase 1499467:1500975 reverse MW:54255	Regular	36723800	0	543119936	74	10	33	28.88	134983	113719	41656	0	3	Pass1	PepFrag1	None	24643770	VALASGLVESGDNIIIVAGVPVGTGR	VALASGLVESGDNIIIVAGVPVGTGR	466	26	4.07	213	17	17	11	3	240917200	79468	Identified	7734	5.8	b3b4b7b8b13b14b15b16b17y4y6y7y8y9y10y11y26	366460	2359	214245443756502	102830295837668	0.1663	Green	11505	24643840	24643828	368616	22452	22452.00	2.89	3	8221329
NCDO2118_RS07185	pyruvate kinase 1499467:1500975 reverse MW:54255	Regular	36723800	0	543119936	74	10	33	28.88	134983	113719	41656	0	4	Pass1	PepFrag1	None	8054236	NAQTMLK	NAQTMLK	363	7	10.10	215	3	3	1	0	2642897	59870		3615	2.8	y2y3y7y7*	126888	753	100066709325229	160133418650458	0.0812	Green	2879	8054196	8054205	201383	10959	10959.00	1.39	1	8054196
NCDO2118_RS07185	pyruvate kinase 1499467:1500975 reverse MW:54255	Regular	36723800	0	543119936	74	10	33	28.88	134983	113719	41656	0	5	Pass1	PepFrag1	None	18088913	TELFADGADAISVVTGDK	TELFADGADAISVVTGDK	95	18	3.50	212	4	4	1	1	9142250	65260		415	2.1	b3b4b8y10y11y14	312592	1666	169906358587853	129906358587853	0.0150	Green	9799	18089019	18089008	322618	2026	2026.00	2.00	2	9049546
NCDO2118_RS07185	pyruvate kinase 1499467:1500975 reverse MW:54255	Regular	36723800	0	543119936	74	10	33	28.88	134983	113719	41656	0	6	Pass1	PepFrag1	None	10135778	IPFPALAER	IPFPALAER	192	9	7.00	211	2	2	0	0	15056200	67427	Identified	487	1.5	y6y8	263943	954	117163377846316	771633778463164	0.0115	Green	7242	10135689	10135716	273283	1546	1546.00	2.00	2	5072881
NCDO2118_RS07185	pyruvate kinase 1499467:1500975 reverse MW:54255	Regular	36723800	0	543119936	74	10	33	28.88	134983	113719	41656	0	7	Pass1	PepFrag1	None	8925138	VGFLLDTK	VGFLLDTK	82	8	6.78	210	2	2	0	0	14444750	67247		217	1.2	y4y7	251998	855	108910656856658	689106568566584	0.0070	Green	6603	8925058	8925086	260929	944	944.00	2.00	2	4467565
NCDO2118_RS07185	pyruvate kinase 1499467:1500975 reverse MW:54255	Regular	36723800	0	543119936	74	10	33	28.88	134983	113719	41656	0	8	Pass1	PepFrag1	None	13447482	LIVALTESGNTAR	LIVALTESGNTAR	403	13	7.00	209	3	3	1	0	4489935	62172		215	1.3	y6y9y10	227009	1271	141858926121739	101858926121739	0.0060	Green	4261	13447469	13447487	228659	811	811.00	2.00	2	6728771
NCDO2118_RS07185	pyruvate kinase 1499467:1500975 reverse MW:54255	Regular	36723800	0	543119936	74	10	33	28.88	134983	113719	41656	0	9	Pass2	MissedCleavage	None	22681475	IVVTATNMLESMTYNPRATR	IVVTATNMLESMTYNPRATR	302	20	9.84	217	3	3	0	0	3983374	61652	Missing	376	2.8	b10y7y9y10y12y12*	272570	2113	199079236075698	927194907171321	0.0305	Green	7229	22681216	22681225	273013	4123	4123.00	3.00	3	7567120
NCDO2118_RS07185	pyruvate kinase 1499467:1500975 reverse MW:54255	Regular	36723800	0	543119936	74	10	33	28.88	134983	113719	41656	0	10	Pass2	MissedCleavage	None	14627723	VGFLLDTKGPEMR	VGFLLDTKGPEMR	82	13	7.03	216	0	0	0	0	1568840	57605	Missing	121	1.4	b6	259925	1374	149423001520314	596153343468762	0.0063	Green	6115	14627594	14627655	254699	855	855.00	3.00	3	4882580
NCDO2118_RS07185	pyruvate kinase 1499467:1500975 reverse MW:54255	Regular	90831430	0	543119936	185	18	33	45.22	606884	317216	370273	1	1	Pass1	PepFrag1	None	13447482	LIVALTESGNTAR	LIVALTESGNTAR	403	13	7.00	313	19	19	14	7	433803200	85955		117352	8.6	b2b3b4b5b6b7b7b10b12b13b13*y2y3y4*y5y5y6y7y7y8y9y9y10y10y11y11y12y13	241611	1271	141858926121739	101858926121739	0.2175	Green	3017	13447506	13447525	217863	131991	131991.00	1.96	2	6728789
NCDO2118_RS07185	pyruvate kinase 1499467:1500975 reverse MW:54255	Regular	90831430	0	543119936	185	18	33	45.22	606884	317216	370273	0	2	Pass1	PepFrag1	None	12547416	IVSTLGPAVEIR	IVSTLGPAVEIR	6	12	7.00	314	15	15	11	4	598984500	87357	Identified	53490	7.5	b2b3b3b4b4b5b5b12b12y2y3y4y6y7y7y8y9y9y10y10y11y12	268981	1210	137282932554542	972829325545422	0.1634	Green	5457	12547379	12547402	247204	99173	99173.00	1.98	2	6278726
NCDO2118_RS07185	pyruvate kinase 1499467:1500975 reverse MW:54255	Regular	90831430	0	543119936	185	18	33	45.22	606884	317216	370273	0	3	Pass1	PepFrag1	None	24643770	VALASGLVESGDNIIIVAGVPVGTGR	VALASGLVESGDNIIIVAGVPVGTGR	466	26	4.07	319	28	28	19	7	458146900	86192	Identified	36861	9.5	b2b3b4b5b6b6b7b8b9b10b11b13b13b14b14b15b15b16*b17b18b19b20b26y4y5y6y7y8y8y9y11y12y16y17y17y18y19y26	400709	2359	214245443756502	102830295837668	0.1418	Green	21953	24643792	24643782	365788	86052	86052.00	2.80	3	8221312
NCDO2118_RS07185	pyruvate kinase 1499467:1500975 reverse MW:54255	Regular	90831430	0	543119936	185	18	33	45.22	606884	317216	370273	0	4	Pass1	PepFrag1	None	10135778	IPFPALAER	IPFPALAER	192	9	7.00	316	10	10	8	2	381692000	85399	Identified	79248	6.3	b2b3y2y3y4y5y6y6y7y7y8y8y9	255909	954	117163377846316	771633778463164	0.1357	Green	7670	10135748	10135776	270699	82336	82336.00	1.99	2	5072911
NCDO2118_RS07185	pyruvate kinase 1499467:1500975 reverse MW:54255	Regular	90831430	0	543119936	185	18	33	45.22	606884	317216	370273	0	5	Pass1	PepFrag1	None	8925138	VGFLLDTK	VGFLLDTK	82	8	6.78	315	10	10	7	3	277011300	84007		11617	4.2	b2b3b5y2y2y3y4y4y5y5y6y7y7y8	257610	855	108910656856658	689106568566584	0.0503	Green	6350	8925145	8925174	256703	30512	30512.00	1.66	2	4467609
NCDO2118_RS07185	pyruvate kinase 1499467:1500975 reverse MW:54255	Regular	90831430	0	543119936	185	18	33	45.22	606884	317216	370273	0	6	Pass1	PepFrag1	None	15168118	NIAALIEEGANVFR	NIAALIEEGANVFR	40	14	4.26	321	14	14	8	4	36631650	75221		26295	5.0	b3b4b5*b6b7*b8b9b10b12y2y3y5y6*y7y8y9y10y10y11y11*y12	345232	1419	152667958378682	112667958378682	0.0447	Green	26887	15168149	15168160	402292	27112	27112.00	2.05	2	7589111
NCDO2118_RS07185	pyruvate kinase 1499467:1500975 reverse MW:54255	Regular	90831430	0	543119936	185	18	33	45.22	606884	317216	370273	0	7	Pass1	PepFrag1	None	7884876	LGLSLTGK	LGLSLTGK	155	8	10.10	312	10	10	6	2	241004200	83403		7483	4.0	b4b4b6b7b8b8y2y3y4y5y5y6y7y7y8	183696	769	101479237201927	162958474403854	0.0427	Green	2446	7884889	7884907	209247	25892	25892.00	1.51	1	7884889
NCDO2118_RS07185	pyruvate kinase 1499467:1500975 reverse MW:54255	Regular	90831430	0	543119936	185	18	33	45.22	606884	317216	370273	0	8	Pass1	PepFrag1	None	19399616	IVVTATNMLESMTYNPR	IVVTATNMLESMTYNPR	302	17	7.00	317	20	20	12	6	494513800	86524	Identified	7423	4.8	b3b4b5b7b8b9b9b12b12*b14*b14b15b15b17y2y3y4y4*y5y6y7y8y8y10y12*y13y14y15y15*y16*y17*	316216	1805	179230165172554	139230165172554	0.0341	Green	14851	19399690	19399672	318006	20704	20704.00	2.27	2	9704882
NCDO2118_RS07185	pyruvate kinase 1499467:1500975 reverse MW:54255	Regular	90831430	0	543119936	185	18	33	45.22	606884	317216	370273	0	9	Pass1	PepFrag1	None	31264832	GLMINWGVIPTMTEKPSSTDDMFEVAEK	GLMINWGVIPTMTEKPSSTDDMFEVAEK	438	28	3.92	320	13	13	8	4	58032740	77219	Identified	14394	5.8	b2b3b4b5b6b7b7*b13b13*b13y19y22y23y24y25y28	428444	2895	245579444639063	123719629759375	0.0338	Green	24791	31264928	31264850	385778	20543	20543.00	2.99	3	10428358
NCDO2118_RS07185	pyruvate kinase 1499467:1500975 reverse MW:54255	Regular	90831430	0	543119936	185	18	33	45.22	606884	317216	370273	0	10	Pass1	PepFrag1	Carbamidomethyl C(2)	17088687	ICEETGNPHVQLLAK	ICEETGNPHVQLLAK	235	15	5.30	311	10	10	6	1	57423480	77173	Identified	2607	4.1	b2y2y6y7y8y11y12y13y13y14y15	199761	1542	161367430379895	6757828691993	0.0242	Green	1523	17088660	17088694	186413	14667	14667.00	2.93	3	5702935
NCDO2118_RS07185	pyruvate kinase 1499467:1500975 reverse MW:54255	Regular	90831430	0	543119936	185	18	33	45.22	606884	317216	370273	0	11	Pass1	PepFrag1	None	19230487	FGLSQPGGINFIAISFVR	FGLSQPGGINFIAISFVR	207	18	11.05	322	4	4	0	1	85458130	78900	Identified	2738	4.2	b5b7*b8*b9*b13y4y6y13	425588	1811	179627131410996	139627131410996	0.0225	Green	28786	19230497	19230480	422470	13670	13670.00	2.17	2	9620285
NCDO2118_RS07185	pyruvate kinase 1499467:1500975 reverse MW:54255	Regular	90831430	0	543119936	185	18	33	45.22	606884	317216	370273	0	12	Pass1	PepFrag1	None	18088913	TELFADGADAISVVTGDK	TELFADGADAISVVTGDK	95	18	3.50	318	4	4	0	0	8134867	68686		650	2.3	b5b6y9y15y18	318425	1666	169906358587853	129906358587853	0.0040	Green	14994	18089034	18089026	319090	2409	2409.00	2.10	2	9049553
NCDO2118_RS07185	pyruvate kinase 1499467:1500975 reverse MW:54255	Regular	90831430	0	543119936	185	18	33	45.22	606884	317216	370273	0	13	Pass1	PepFrag1	None	26553294	IENQQGIENLDEIIEAADGIMIAR	IENQQGIENLDEIIEAADGIMIAR	250	24	3.43	323	4	4	0	0	7851133	68532		823	2.4	b4b8*y4y7y9y23	423687	2475	221212553895603	107475035930402	0.0035	Green	30398	26553352	26553325	442796	2149	2149.00	3.00	3	8857832
NCDO2118_RS07185	pyruvate kinase 1499467:1500975 reverse MW:54255	Regular	90831430	0	543119936	185	18	33	45.22	606884	317216	370273	0	14	Pass2	MissedCleavage	None	14627723	VGFLLDTKGPEMR	VGFLLDTKGPEMR	82	13	7.03	324	1	1	0	0	5759286	67186	Missing	412	1.9	b12y9y10y12	279898	1374	149423001520314	109423001520314	0.0035	Green	8763	14627693	14627707	279825	2109	2109.00	2.00	2	7318883
NCDO2118_RS07185	pyruvate kinase 1499467:1500975 reverse MW:54255	Regular	90831430	0	543119936	185	18	33	45.22	606884	317216	370273	0	15	Pass2	MissedCleavage	None	22681475	IVVTATNMLESMTYNPRATR	IVVTATNMLESMTYNPRATR	302	20	9.84	325	1	1	0	0	1412114	61081	Missing	460	1.7	b8b19*y4y13*	293837	2113	199079236075698	595396180378491	0.0017	Green	10739	22681614	22681614	294082	1053	1053.00	4.00	4	5677958
NCDO2118_RS07185	pyruvate kinase 1499467:1500975 reverse MW:54255	Regular	90831430	0	543119936	185	18	33	45.22	606884	317216	370273	0	16	Pass2	MissedCleavage	None	22881915	NAAEAMDIKLIVALTESGNTAR	NAAEAMDIKLIVALTESGNTAR	394	22	4.44	326	4	4	1	0	4027596	65633		691	1.7	y5y6y6y11y15	357463	2151	201458953880691	943059692537937	0.0016	Green	20893	22881721	22881724	357969	946	946.00	3.00	3	7633955
NCDO2118_RS07185	pyruvate kinase 1499467:1500975 reverse MW:54255	Regular	90831430	0	543119936	185	18	33	45.22	606884	317216	370273	0	17	Pass2	VarMod	Phosphoryl STY(13);Phosphoryl STY(33)	57317749	GLMINWGVIPTMTEKPSSTDDMFEVAEKVALASGLVESGDNIIIVAGVPVGTGR	GLMINWGVIPTMTEKPSSTDDMFEVAEKVALASGLVESGDNIIIVAGVPVGTGR	438	54	3.96	328	2	2	0	0	996368	59567	Identified	677	8.1	b5*b8*b9b11*b14*b14b30-H3PO4b39y17y18*	391180	5254	365386933962884	106154773585153	0.0436	Green	24101	57318094	57318094	380538	26440	26440.00	4.98	5	11471677
NCDO2118_RS07185	pyruvate kinase 1499467:1500975 reverse MW:54255	Regular	90831430	0	543119936	185	18	33	45.22	606884	317216	370273	0	18	Pass2	VarMod	Phosphoryl STY(*);Phosphoryl STY(*)	57317749	GLMINWGVIPTMTEKPSSTDDMFEVAEKVALASGLVESGDNIIIVAGVPVGTGR	GLMINWGVIPTMTEKPSSTDDMFEVAEKVALASGLVESGDNIIIVAGVPVGTGR	438	54	3.96	327	1	1	0	0	906696	59157	Missing	648	3.3	b7b14b34-2(H3PO4)y4-H3PO4y16y24	391180	5254	365386933962884	817956446542945	0.0038	Green	27885	57317961	57317961	412985	2331	2331.00	6.00	6	9561387
NCDO2118_RS07185	pyruvate kinase 1499467:1500975 reverse MW:54255	Regular	90831430	0	543119936	185	18	33	45.22	606884	317216	370273	0	19	Pass2	InSource	None	6563726	PALAER	IPFPALAER	195	6	7.00	316	3	3	0	0	2853071	0.0000	Identified	2552	0.0	b2b5y6	255909	605	86482828258383	132965656516766	0.0107	Green	7672	6563736	6563754	270734	6511	6511.00	1.00	1	6563736
NCDO2118_RS07185	pyruvate kinase 1499467:1500975 reverse MW:54255	Regular	90831430	0	543119936	185	18	33	45.22	606884	317216	370273	0	20	Pass2	InSource	None	7414254	GPAVEIR	IVSTLGPAVEIR	11	7	7.00	314	4	4	1	0	1956392	0.0000	Missing	2279	0.0	b7y1y2y4y7	268981	691	944956171580674	148991234316135	0.0054	Green	5459	7414268	7414286	247221	3282	3282.00	1.00	1	7414268
NCDO2118_RS07185	pyruvate kinase 1499467:1500975 reverse MW:54255	Regular	90831430	0	543119936	185	18	33	45.22	606884	317216	370273	0	21	Pass2	InSource	None	5052980	SLTGK	LGLSLTGK	158	5	10.10	312	4	4	2	0	74400540	0.0000		728	0.0	y1y2y3y3y5	183696	473	73395099123788	106790198247576	0.0036	Green	2444	5052971	5052987	209214	2206	2206.00	1.00	1	5052971
NCDO2118_RS07185	pyruvate kinase 1499467:1500975 reverse MW:54255	Regular	90831430	0	543119936	185	18	33	45.22	606884	317216	370273	0	22	Pass2	InSource	None	10425891	STLGPAVEIR	IVSTLGPAVEIR	8	10	7.00	314	0	0	0	0	1413313	0.0000	Missing	0	0.0		268981	981	119363709156196	198727418312392	0.0033	Green	5458	10425883	10425901	247217	2020	2020.00	1.00	1	10425883
NCDO2118_RS07185	pyruvate kinase 1499467:1500975 reverse MW:54255	Regular	90831430	0	543119936	185	18	33	45.22	606884	317216	370273	0	23	Pass2	InSource	None	7424206	GVPVGTGR	VALASGLVESGDNIIIVAGVPVGTGR	484	8	11.05	319	1	1	0	0	1325896	0.0000	Missing	709	0.0	y8	400709	685	939478145556335	147895629111267	0.0020	Green	21951	7424218	7424237	365763	1185	1185.00	1.00	1	7424218
NCDO2118_RS07185	pyruvate kinase 1499467:1500975 reverse MW:54255	Regular	90831430	0	543119936	185	18	33	45.22	606884	317216	370273	0	24	Pass2	InSource	None	5143235	IVSTL	IVSTLGPAVEIR	6	5	6.13	314	1	1	0	0	184324	0.0000		43	0.0	b2	268981	519	780796526726996	116159305345399	0.0013	Green	5448	5143215	5143231	247151	810	810.00	1.00	1	5143215
NCDO2118_RS07185	pyruvate kinase 1499467:1500975 reverse MW:54255	Regular	90831430	0	543119936	185	18	33	45.22	606884	317216	370273	0	25	Pass2	InSource	None	4762715	LDTK	VGFLLDTK	86	4	6.78	315	2	2	0	0	1484852	0.0000		93	0.0	y2y4	257610	443	702579464350205	100515892870041	0.0013	Green	6352	4762679	4762694	256713	781	781.00	1.00	1	4762679
NCDO2118_RS07185	pyruvate kinase 1499467:1500975 reverse MW:54255	Regular	4607051	0	543119936	31	6	33	14.14	136561	30412	13698	1	1	Pass1	PepFrag1	None	24643770	VALASGLVESGDNIIIVAGVPVGTGR	VALASGLVESGDNIIIVAGVPVGTGR	466	26	4.07	157	18	18	14	4	76930000	65495	Identified	4244	5.0	b3b4b7b8b9b12b13b14b14*b15b16b17y6y7y8y9y10y11y12	369634	2359	214245443756502	102830295837668	0.1065	Green	6713	24643840	24643840	369634	14547	14547.00	2.91	3	8221329
NCDO2118_RS07185	pyruvate kinase 1499467:1500975 reverse MW:54255	Regular	4607051	0	543119936	31	6	33	14.14	136561	30412	13698	0	2	Pass1	PepFrag1	None	7043210	DDADIR	DDADIR	201	6	3.59	158	6	6	3	1	29855080	61384		7613	2.9	b4b5y2y4y5y6	100062	612	871486336156241	134297267231248	0.1048	Yellow	1183	7043221	7043240	100062	14309	14309.00	1.00	1	7043221
NCDO2118_RS07185	pyruvate kinase 1499467:1500975 reverse MW:54255	Regular	4607051	0	543119936	31	6	33	14.14	136561	30412	13698	0	3	Pass1	PepFrag1	Carbamidomethyl C(2)	17088687	ICEETGNPHVQLLAK	ICEETGNPHVQLLAK	235	15	5.30	155	1	1	0	0	4399759	53069	Missing	59	1.8	y14	201171	1542	161367430379895	6757828691993	0.0114	Yellow	4314	17088656	17088656	201171	1556	1556.00	3.00	3	5702934
NCDO2118_RS07185	pyruvate kinase 1499467:1500975 reverse MW:54255	Regular	4607051	0	543119936	31	6	33	14.14	136561	30412	13698	0	4	Pass1	PepFrag1	None	10135778	IPFPALAER	IPFPALAER	192	9	7.00	156	2	2	0	0	6287831	54619	Identified	346	1.4	y6y8	275657	954	117163377846316	771633778463164	0.0094	Yellow	5366	10135770	10135778	275657	1281	1281.00	2.00	2	5072922
NCDO2118_RS07185	pyruvate kinase 1499467:1500975 reverse MW:54255	Regular	4607051	0	543119936	31	6	33	14.14	136561	30412	13698	0	5	Pass2	PepFrag2	None	13106521	NAQTMLKEYGR	NAQTMLKEYGR	363	11	9.72	160	1	1	0	0	985649	46571		874	2.2	b7*y11	409207	1199	136449649027853	964496490278527	0.0260	Red	7468	13107023	13107025	409207	3544	3544.00	1.77	2	6558548
NCDO2118_RS07185	pyruvate kinase 1499467:1500975 reverse MW:54255	Regular	4607051	0	543119936	31	6	33	14.14	136561	30412	13698	0	6	Pass2	MissedCleavage	None	15968479	YDKSTVTEVVAASVK	YDKSTVTEVVAASVK	379	15	6.95	159	0	0	0	0	3432464	51990		138	8.2	b6b9	406855	1497	158212515050309	118212515050309	0.7360	Yellow	7408	15968361	15968353	406855	100515	100515.00	2.00	2	7989217
NCDO2118_RS07185	pyruvate kinase 1499467:1500975 reverse MW:54255	Regular	4607051	0	543119936	31	6	33	14.14	136561	30412	13698	0	7	Pass2	InSource	None	5892940	DADIR	DDADIR	202	5	3.88	158	3	3	1	0	673857	0.0000		424	0.0	y1y2y5	100033	521	782801140493743	116560228098749	0.0059	Yellow	1182	5892882	5892905	100033	809	809.00	1.00	1	5892882
NCDO2118_RS07185	pyruvate kinase 1499467:1500975 reverse MW:54255	Regular	50158500	0	543119936	108	16	33	43.03	360318	292216	289103	1	1	Pass1	PepFrag1	None	26553294	IENQQGIENLDEIIEAADGIMIAR	IENQQGIENLDEIIEAADGIMIAR	250	24	3.43	307	28	28	19	9	452447800	83559		102185	11.8	b2b3b4b5b5*b5b6b6*b6b7b7*b7b8*b9b9*b9b10b10*b11b11*b11b12b12b13b13*b13b14b15b17b17*b20y4y5y6y7y7y8y9y10y11y12y13y14y17y20y24y24*	371991	2475	221212553895603	107475035930402	0.4726	Green	18941	26553275	26553248	444196	170283	170283.00	2.95	3	8857807
NCDO2118_RS07185	pyruvate kinase 1499467:1500975 reverse MW:54255	Regular	50158500	0	543119936	108	16	33	43.03	360318	292216	289103	0	2	Pass1	PepFrag1	Carbamidomethyl C(2)	17088687	ICEETGNPHVQLLAK	ICEETGNPHVQLLAK	235	15	5.30	309	26	26	22	10	826496300	86176	Identified	174889	8.6	b2b3b4b4b5b7b7b9b10b11b11*b11b12b12*b12b13b13b14b15b15*y1y2y3y4y5y5*y6y7y8y8*y9y9*y10y11y11*y12y12*y12y13y13y14y14*y14y15	226091	1542	161367430379895	121367430379895	0.3209	Green	3833	17088689	17088682	196703	115632	115632.00	2.20	2	8549381
NCDO2118_RS07185	pyruvate kinase 1499467:1500975 reverse MW:54255	Regular	50158500	0	543119936	108	16	33	43.03	360318	292216	289103	0	3	Pass1	PepFrag1	None	18088913	TELFADGADAISVVTGDK	TELFADGADAISVVTGDK	95	18	3.50	304	10	10	2	2	39437240	72963		1257	3.2	b2b3b4b8b17y4y6y8y10y12y14	305404	1666	169906358587853	129906358587853	0.0175	Green	14543	18088957	18088942	322608	6301	6301.00	2.04	2	9049515
NCDO2118_RS07185	pyruvate kinase 1499467:1500975 reverse MW:54255	Regular	50158500	0	543119936	108	16	33	43.03	360318	292216	289103	0	4	Pass1	PepFrag1	None	17399075	HRPNADILAITFDEK	HRPNADILAITFDEK	420	15	5.28	305	4	4	1	1	6676201	65249	Missing	702	3.0	b6b7b11y6y7y8y11y12*	264708	1612	166214787680525	708098584536835	0.0170	Green	15869	17399005	17399032	343276	6124	6124.00	2.91	3	5806384
NCDO2118_RS07185	pyruvate kinase 1499467:1500975 reverse MW:54255	Regular	50158500	0	543119936	108	16	33	43.03	360318	292216	289103	0	5	Pass1	PepFrag1	None	5733970	LIISK	LIISK	291	5	10.10	311	4	4	1	1	72901420	75631		579	1.7	b2y2y3y5	151653	580	840836643499463	128167328699893	0.0103	Green	1439	5733956	5733973	149966	3706	3706.00	1.00	1	5733956
NCDO2118_RS07185	pyruvate kinase 1499467:1500975 reverse MW:54255	Regular	50158500	0	543119936	108	16	33	43.03	360318	292216	289103	0	6	Pass1	PepFrag1	None	24643770	VALASGLVESGDNIIIVAGVPVGTGR	VALASGLVESGDNIIIVAGVPVGTGR	466	26	4.07	306	5	5	1	0	13543080	68321	Identified	542	3.0	b14b15y6y8y10	356434	2359	214245443756502	102830295837668	0.0101	Green	17003	24643578	24643567	368394	3655	3655.00	2.87	3	8221241
NCDO2118_RS07185	pyruvate kinase 1499467:1500975 reverse MW:54255	Regular	50158500	0	543119936	108	16	33	43.03	360318	292216	289103	0	7	Pass1	PepFrag1	None	16988810	IPFPALAERDDADIR	IPFPALAERDDADIR	192	15	3.97	303	2	2	0	0	15706460	68964	Identified	307	1.8	y5y8y12	267357	1566	163037487006469	686916580043129	0.0046	Green	10474	16988784	16988812	270931	1668	1668.00	3.00	3	5669643
NCDO2118_RS07185	pyruvate kinase 1499467:1500975 reverse MW:54255	Regular	50158500	0	543119936	108	16	33	43.03	360318	292216	289103	0	8	Pass1	PepFrag1	None	15347384	EFEVEAQNDGVIGK	EFEVEAQNDGVIGK	168	14	3.69	302	5	5	0	0	6387660	65057		530	1.7	b11y1y5y10y12y14	249936	1395	150941654454293	110941654454293	0.0038	Green	4624	15347409	15347413	207352	1368	1368.00	2.00	2	7678741
NCDO2118_RS07185	pyruvate kinase 1499467:1500975 reverse MW:54255	Regular	50158500	0	543119936	108	16	33	43.03	360318	292216	289103	0	9	Pass1	PepFrag1	None	19318658	FGESGYWGESLDVEASAK	FGESGYWGESLDVEASAK	22	18	3.69	308	4	4	0	0	2481498	60951		278	1.6	b8b11b13y9y11	292361	1718	17342368383482	756157892232132	0.0024	Green	5221	19318505	19318524	214646	869	869.00	2.60	3	6446217
NCDO2118_RS07185	pyruvate kinase 1499467:1500975 reverse MW:54255	Regular	50158500	0	543119936	108	16	33	43.03	360318	292216	289103	0	10	Pass2	PepFrag2	None	19389340	GDMGIEVPFEMVPVYQK	GDMGIEVPFEMVPVYQK	274	17	3.83	310	1	1	0	0	1277299	58066	Missing	32	2.0	y7	352874	1797	178700191922053	138700191922053	0.0054	Green	14987	19389171	19389144	329119	1950	1950.00	2.00	2	9699622
NCDO2118_RS07185	pyruvate kinase 1499467:1500975 reverse MW:54255	Regular	50158500	0	543119936	108	16	33	43.03	360318	292216	289103	0	11	Pass2	PepFrag2	None	20489883	DAATREFEVEAQNDGVIGK	DAATREFEVEAQNDGVIGK	163	19	3.92	317	1	1	0	0	280469	51482		97	2.0	b8	249430	1861	18291832518074	81945550120493	0.0046	Yellow	15116	20489360	20489374	331168	1650	1650.00	3.00	3	6836502
NCDO2118_RS07185	pyruvate kinase 1499467:1500975 reverse MW:54255	Regular	50158500	0	543119936	108	16	33	43.03	360318	292216	289103	0	12	Pass2	MissedCleavage	None	15968479	YDKSTVTEVVAASVK	YDKSTVTEVVAASVK	379	15	6.95	312	0	0	0	0	2064072	60151		341	3.5	b10	198674	1497	158212515050309	654750100335392	0.0277	Green	3165	15968629	15968660	188100	9975	9975.00	3.00	3	5329592
NCDO2118_RS07185	pyruvate kinase 1499467:1500975 reverse MW:54255	Regular	50158500	0	543119936	108	16	33	43.03	360318	292216	289103	0	13	Pass2	VarMod	Phosphoryl STY(*)	12706290	STVTEVVAASVK	STVTEVVAASVK	382	12	7.00	314	3	3	1	0	3090374	61904		3232	4.2	y4y11y12	200872	1130	131163177712208	911631777122084	0.0561	Green	5752	12706319	12706336	221078	20198	20198.00	2.00	2	6358196
NCDO2118_RS07185	pyruvate kinase 1499467:1500975 reverse MW:54255	Regular	50158500	0	543119936	108	16	33	43.03	360318	292216	289103	0	14	Pass2	VarMod	Oxidation M(21)	26713243	IENQQGIENLDEIIEAADGIMIAR	IENQQGIENLDEIIEAADGIMIAR	250	24	3.43	313	11	11	5	1	30126040	71793		2439	3.8	b5b8b12b13*b15y4y6y7y8y9y10y11y24	371991	2475	221212553895603	107475035930402	0.0216	Green	17999	26713306	26713278	393679	7771	7771.00	2.89	3	8911151
NCDO2118_RS07185	pyruvate kinase 1499467:1500975 reverse MW:54255	Regular	50158500	0	543119936	108	16	33	43.03	360318	292216	289103	0	15	Pass2	VarMod	Phosphoryl STY(19)	26313330	FGLSQPGGINFIAISFVRTANDVK	FGLSQPGGINFIAISFVRTANDVK	207	24	10.12	315	2	2	0	0	1789770	59531	Missing	435	3.2	b7b13*b18y9y12	348341	2398	216600316407505	104400210938337	0.0132	Green	16235	26313309	26313284	350624	4740	4740.00	3.00	3	8777818
NCDO2118_RS07185	pyruvate kinase 1499467:1500975 reverse MW:54255	Regular	50158500	0	543119936	108	16	33	43.03	360318	292216	289103	0	16	Pass2	VarMod	Oxidation M(30);Phosphoryl STY(5)	31636180	VALASGLVESGDNIIIVAGVPVGTGRTNTMR	VALASGLVESGDNIIIVAGVPVGTGRTNTMR	466	31	7.11	316	0	0	0	0	5851262	64676	Identified	466	2.1	b9y7y11	324343	2913	246596338561848	83298169280924	0.0031	Green	8773	31635944	31635944	253094	1128	1128.00	4.00	4	7916540
NCDO2118_RS07185	pyruvate kinase 1499467:1500975 reverse MW:54255	Regular	50158500	0	543119936	108	16	33	43.03	360318	292216	289103	0	17	Pass2	InSource	None	4733082	GVIGK	EFEVEAQNDGVIGK	177	5	10.10	302	0	0	0	0	122959	0.0000		0	0.0		249936	460	72044061560179	104088123120358	0.0067	Green	4628	4733088	4733105	207407	2423	2423.00	1.00	1	4733088
NCDO2118_RS07185	pyruvate kinase 1499467:1500975 reverse MW:54255	Regular	50158500	0	543119936	108	16	33	43.03	360318	292216	289103	0	18	Pass2	InSource	None	8464502	ADGIMIAR	IENQQGIENLDEIIEAADGIMIAR	266	8	7.00	307	2	2	0	0	4468843	0.0000		792	0.0	y6y8	371991	793	103579805793912	167159611587823	0.0024	Green	18952	8464455	8464468	444342	877	877.00	1.00	1	8464455
NCDO2118_RS07185	pyruvate kinase 1499467:1500975 reverse MW:54255	Regular	139672800	0	543119936	245	25	33	58.76	1453782	784034	666479	1	1	Pass1	PepFrag1	None	24643770	VALASGLVESGDNIIIVAGVPVGTGR	VALASGLVESGDNIIIVAGVPVGTGR	466	26	4.07	263	32	32	25	10	546159200	88824	Identified	141040	15.5	b2b3b6b6b7b8b8b9b10b10b11b12b12b13b14b14b15b16b16b17b18b19b20b20*y1y2y3y4y4y6y6y7y8y9y10y11y12y15y16y17y18y18*y22*y26	395208	2359	214245443756502	102830295837668	0.2254	Green	32325	24643852	24643846	364349	327732	327732.00	2.72	3	8221333
NCDO2118_RS07185	pyruvate kinase 1499467:1500975 reverse MW:54255	Regular	139672800	0	543119936	245	25	33	58.76	1453782	784034	666479	0	2	Pass1	PepFrag1	None	19399616	IVVTATNMLESMTYNPR	IVVTATNMLESMTYNPR	302	17	7.00	261	28	28	23	12	1256205000	92442	Identified	99156	12.7	b2b3b4b4b5b5b6b6b7b8b8b9b9b10b11b11b12b13b14b14b15b15*b17y2y3y3*y4y4*y5y5y6y7y7*y8y8y9y9*y9y10y11y12y12y13y13y14y14*y14y15y15*y15y17	312595	1805	179230165172554	139230165172554	0.2004	Green	21705	19399545	19399533	316986	291278	291278.00	2.27	2	9704809
NCDO2118_RS07185	pyruvate kinase 1499467:1500975 reverse MW:54255	Regular	139672800	0	543119936	245	25	33	58.76	1453782	784034	666479	0	3	Pass1	PepFrag1	None	8925138	VGFLLDTK	VGFLLDTK	82	8	6.78	259	9	9	6	1	243062200	85308		75238	7.8	b3b4b5b6b7b7y3y3y5y6y7y7y8	245671	855	108910656856658	177821313713317	0.1135	Green	8805	8925157	8925175	254725	165024	165024.00	1.00	1	8925157
NCDO2118_RS07185	pyruvate kinase 1499467:1500975 reverse MW:54255	Regular	139672800	0	543119936	245	25	33	58.76	1453782	784034	666479	0	4	Pass1	PepFrag1	None	13447482	LIVALTESGNTAR	LIVALTESGNTAR	403	13	7.00	257	20	20	16	8	837853800	90683		130976	9.3	b2b3b4b5b6b6b7b8b9b9b11y2y3y4y4*y5y6y6y7y7y8y8y9y9y10y10y11y11*y12y12*y13	235390	1271	141858926121739	101858926121739	0.1110	Green	4592	13447516	13447532	224299	161336	161336.00	1.96	2	6728794
NCDO2118_RS07185	pyruvate kinase 1499467:1500975 reverse MW:54255	Regular	139672800	0	543119936	245	25	33	58.76	1453782	784034	666479	0	5	Pass1	PepFrag1	None	7884876	LGLSLTGK	LGLSLTGK	155	8	10.10	255	13	13	10	4	386921200	87327		52714	7.5	b2b3b4b4b5b5b6b7b8b8y1y2y3y3y4y4y5y5y6y6y7y7y8	172711	769	101479237201927	162958474403854	0.0994	Green	3034	7884882	7884901	209502	144439	144439.00	1.00	1	7884882
NCDO2118_RS07185	pyruvate kinase 1499467:1500975 reverse MW:54255	Regular	139672800	0	543119936	245	25	33	58.76	1453782	784034	666479	0	6	Pass1	PepFrag1	None	31264832	GLMINWGVIPTMTEKPSSTDDMFEVAEK	GLMINWGVIPTMTEKPSSTDDMFEVAEK	438	28	3.92	264	18	18	10	6	305454600	86301	Identified	84630	11.3	b2b3b4b5b5*b6b6*b7b8b9b9*b18b26*y3y16y19y20y21y22y24y26y28y28*	425718	2895	245579444639063	123719629759375	0.0892	Green	36434	31264909	31264832	385484	129660	129660.00	2.96	3	10428351
NCDO2118_RS07185	pyruvate kinase 1499467:1500975 reverse MW:54255	Regular	139672800	0	543119936	245	25	33	58.76	1453782	784034	666479	0	7	Pass1	PepFrag1	Carbamidomethyl C(2)	17088687	ICEETGNPHVQLLAK	ICEETGNPHVQLLAK	235	15	5.30	254	15	15	10	2	217678400	84829	Identified	9011	5.9	b2b7y1y3y5y6y7y8y9y10y11y11*y12y12*y12y13y13y14y14y15	207409	1542	161367430379895	6757828691993	0.0272	Green	1754	17088576	17088614	187280	39610	39610.00	2.90	3	5702907
NCDO2118_RS07185	pyruvate kinase 1499467:1500975 reverse MW:54255	Regular	139672800	0	543119936	245	25	33	58.76	1453782	784034	666479	0	8	Pass1	PepFrag1	None	15168118	NIAALIEEGANVFR	NIAALIEEGANVFR	40	14	4.26	265	12	12	7	4	35874820	76999		5934	5.4	b3b3*b4b4*b6b6*b7b11y3y4y5y6y7y7y9y10y11	349190	1419	152667958378682	112667958378682	0.0229	Green	38524	15168143	15168154	400147	33255	33255.00	2.07	2	7589108
NCDO2118_RS07185	pyruvate kinase 1499467:1500975 reverse MW:54255	Regular	139672800	0	543119936	245	25	33	58.76	1453782	784034	666479	0	9	Pass1	PepFrag1	None	26553294	IENQQGIENLDEIIEAADGIMIAR	IENQQGIENLDEIIEAADGIMIAR	250	24	3.43	266	20	20	10	2	155583600	83371		12779	5.9	b1b2b2b4b5b6b7b7*b8b11b12b12*b13b14b14b15b18*y2y4y6y8y9y11y14y24	423306	2475	221212553895603	107475035930402	0.0173	Green	42469	26553318	26553294	442039	25138	25138.00	2.82	3	8857821
NCDO2118_RS07185	pyruvate kinase 1499467:1500975 reverse MW:54255	Regular	139672800	0	543119936	245	25	33	58.76	1453782	784034	666479	0	10	Pass1	PepFrag1	None	11906627	STVTEVVAASVK	STVTEVVAASVK	382	12	7.00	256	2	2	1	0	7799526	70372		1034	2.9	y3y8y9	223742	1130	131163177712208	911631777122084	0.0050	Green	3883	11906703	11906723	218459	7283	7283.00	2.00	2	5958388
NCDO2118_RS07185	pyruvate kinase 1499467:1500975 reverse MW:54255	Regular	139672800	0	543119936	245	25	33	58.76	1453782	784034	666479	0	11	Pass1	PepFrag1	None	19389340	GDMGIEVPFEMVPVYQK	GDMGIEVPFEMVPVYQK	274	17	3.83	262	7	7	1	2	49373030	78386	Identified	1631	3.2	b4b5b7b12y2y10y12	384745	1797	178700191922053	138700191922053	0.0048	Green	31431	19389392	19389380	360386	6970	6970.00	2.00	2	9699733
NCDO2118_RS07185	pyruvate kinase 1499467:1500975 reverse MW:54255	Regular	139672800	0	543119936	245	25	33	58.76	1453782	784034	666479	0	12	Pass1	PepFrag1	None	17399075	HRPNADILAITFDEK	HRPNADILAITFDEK	420	15	5.28	260	3	3	0	0	4621223	68099	Missing	757	2.9	b6b8*y4y7	234702	1612	166214787680525	708098584536835	0.0038	Green	18305	17398988	17399025	302681	5534	5534.00	2.65	3	5806378
NCDO2118_RS07185	pyruvate kinase 1499467:1500975 reverse MW:54255	Regular	139672800	0	543119936	245	25	33	58.76	1453782	784034	666479	0	13	Pass1	PepFrag1	None	12547416	IVSTLGPAVEIR	IVSTLGPAVEIR	6	12	7.00	258	1	1	0	0	930304	61137	Identified	640	2.2	b4b5b6y2	265144	1210	137282932554542	972829325545422	0.0022	Green	8130	12547424	12547444	249925	3256	3256.00	2.00	2	6278749
NCDO2118_RS07185	pyruvate kinase 1499467:1500975 reverse MW:54255	Regular	139672800	0	543119936	245	25	33	58.76	1453782	784034	666479	0	14	Pass2	PepFrag2	None	19230487	FGLSQPGGINFIAISFVR	FGLSQPGGINFIAISFVR	207	18	11.05	267	16	16	5	3	83836460	80685	Identified	27075	6.0	b5b5b6b7b7*b8b9b9b10b10b11b11b14b18y1y3y4y4y5y6y11y12y13y15y18	417760	1811	179627131410996	139627131410996	0.0248	Green	40445	19230283	19230272	422359	36112	36112.00	2.12	2	9620178
NCDO2118_RS07185	pyruvate kinase 1499467:1500975 reverse MW:54255	Regular	139672800	0	543119936	245	25	33	58.76	1453782	784034	666479	0	15	Pass2	PepFrag2	None	15347384	EFEVEAQNDGVIGK	EFEVEAQNDGVIGK	168	14	3.69	277	0	0	0	0	1489158	63181		302	2.0	b6y10	245350	1395	150941654454293	110941654454293	0.0014	Green	29066	15347885	15347895	349635	2103	2103.00	2.00	2	7678979
NCDO2118_RS07185	pyruvate kinase 1499467:1500975 reverse MW:54255	Regular	139672800	0	543119936	245	25	33	58.76	1453782	784034	666479	0	16	Pass2	PepFrag2	None	28184581	LGLSLTGKDAATREFEVEAQNDGVIGK	LGLSLTGKDAATREFEVEAQNDGVIGK	155	27	4.28	278	1	1	0	0	1135676	62004		3434	2.1	y14y17	286522	2630	230354552612961	190354552612961	0.0010	Green	28062	28185642	28185546	345482	1409	1409.00	2.00	2	14097857
NCDO2118_RS07185	pyruvate kinase 1499467:1500975 reverse MW:54255	Regular	139672800	0	543119936	245	25	33	58.76	1453782	784034	666479	0	17	Pass2	MissedCleavage	None	26083518	DDADIRFGLSQPGGINFIAISFVR	DDADIRFGLSQPGGINFIAISFVR	201	24	4.17	269	3	3	0	0	6655202	69683	Identified	218	2.6	b10b12b13*y6y13y15	428261	2423	218103136075778	105402090717185	0.0018	Green	45117	26083651	26083632	473654	2595	2595.00	2.72	3	8701265
NCDO2118_RS07185	pyruvate kinase 1499467:1500975 reverse MW:54255	Regular	139672800	0	543119936	245	25	33	58.76	1453782	784034	666479	0	18	Pass2	MissedCleavage	None	22881915	NAAEAMDIKLIVALTESGNTAR	NAAEAMDIKLIVALTESGNTAR	394	22	4.44	270	5	5	1	0	5612294	68943		1950	2.4	b11*b18b20*b22y2y3y17y21y22	349011	2151	201458953880691	943059692537937	0.0016	Green	35363	22881869	22881876	379228	2282	2282.00	2.71	3	7634005
NCDO2118_RS07185	pyruvate kinase 1499467:1500975 reverse MW:54255	Regular	139672800	0	543119936	245	25	33	58.76	1453782	784034	666479	0	19	Pass2	MissedCleavage	None	14627723	VGFLLDTKGPEMR	VGFLLDTKGPEMR	82	13	7.03	268	1	1	0	0	4835295	68295	Identified	274	1.9	b13y4	239885	1374	149423001520314	109423001520314	0.0014	Green	7254	14627529	14627541	244299	1984	1984.00	2.00	2	7318801
NCDO2118_RS07185	pyruvate kinase 1499467:1500975 reverse MW:54255	Regular	139672800	0	543119936	245	25	33	58.76	1453782	784034	666479	0	20	Pass2	MissedCleavage	None	30676568	VALASGLVESGDNIIIVAGVPVGTGRTNTMR	VALASGLVESGDNIIIVAGVPVGTGRTNTMR	466	31	7.11	271	3	3	0	0	1604287	63504	Missing	242	2.2	b5b13y13	359927	2913	246596338561848	83298169280924	0.0009	Green	19395	30676702	30676699	307304	1263	1263.00	4.00	4	7676730
NCDO2118_RS07185	pyruvate kinase 1499467:1500975 reverse MW:54255	Regular	139672800	0	543119936	245	25	33	58.76	1453782	784034	666479	0	21	Pass2	VarMod	Oxidation M(6)	12516361	ESVRTMATVNK	ESVRTMATVNK	352	11	10.12	276	3	3	0	0	2225284	64925		340	2.4	b5b9y8*y11	98014	1148	132552389034328	925523890343285	0.0031	Green	29031	12516411	12516430	349455	4499	4499.00	2.00	2	6263242
NCDO2118_RS07185	pyruvate kinase 1499467:1500975 reverse MW:54255	Regular	139672800	0	543119936	245	25	33	58.76	1453782	784034	666479	0	22	Pass2	VarMod	Phosphoryl STY(15)	25732795	GDMGIEVPFEMVPVYQKLIISK	GDMGIEVPFEMVPVYQKLIISK	274	22	4.44	275	4	4	0	0	2796163	65917	Identified	1323	2.5	b19y2y4y6y8*y10*y11*y11y22	444912	2377	215333907863163	103555938575442	0.0017	Green	36476	25732972	25732956	385787	2540	2540.00	2.74	3	8584373
NCDO2118_RS07185	pyruvate kinase 1499467:1500975 reverse MW:54255	Regular	139672800	0	543119936	245	25	33	58.76	1453782	784034	666479	0	23	Pass2	VarMod	Oxidation M(3)	19549289	GDMGIEVPFEMVPVYQK	GDMGIEVPFEMVPVYQK	274	17	3.83	272	1	1	0	0	912413	61053	Missing	492	2.2	b9y7*y17*	384745	1797	178700191922053	791334612813685	0.0017	Green	21005	19549285	19549313	314057	2503	2503.00	3.00	3	6523144
NCDO2118_RS07185	pyruvate kinase 1499467:1500975 reverse MW:54255	Regular	139672800	0	543119936	245	25	33	58.76	1453782	784034	666479	0	24	Pass2	VarMod	Phosphoryl STY(3)	9244914	VATKQGLK	VATKQGLK	115	8	10.60	274	2	2	0	0	2273877	65019		142	1.6	b7y7	12403	821	106003874422626	660038744226262	0.0014	Green	8796	9244964	9244988	254682	1974	1974.00	2.00	2	4627518
NCDO2118_RS07185	pyruvate kinase 1499467:1500975 reverse MW:54255	Regular	139672800	0	543119936	245	25	33	58.76	1453782	784034	666479	0	25	Pass2	VarMod	Oxidation M(12)	19559565	IVVTATNMLESMTYNPR	IVVTATNMLESMTYNPR	302	17	7.00	273	2	2	0	0	1452740	63073	Missing	527	1.5	b9b13*y5	312595	1805	179230165172554	139230165172554	0.0005	Green	41653	19559598	19559584	434019	779	779.00	2.00	2	9784835
NCDO2118_RS07185	pyruvate kinase 1499467:1500975 reverse MW:54255	Regular	139672800	0	543119936	245	25	33	58.76	1453782	784034	666479	0	26	Pass2	InSource	None	5052980	SLTGK	LGLSLTGK	158	5	10.10	255	8	8	6	2	395623200	0.0000		8162	0.0	b3b3b4b4b5b5y1y2y3y3y4y4y5	172711	473	73395099123788	106790198247576	0.0253	Green	3047	5052966	5052983	209540	36812	36812.00	1.00	1	5052966
NCDO2118_RS07185	pyruvate kinase 1499467:1500975 reverse MW:54255	Regular	139672800	0	543119936	245	25	33	58.76	1453782	784034	666479	0	27	Pass2	InSource	None	7424206	GVPVGTGR	VALASGLVESGDNIIIVAGVPVGTGR	484	8	11.05	263	1	1	0	0	1254803	0.0000	Missing	2609	0.0	y8	395208	685	939478145556335	147895629111267	0.0027	Green	32315	7424208	7424227	364317	3854	3854.00	1.00	1	7424208
NCDO2118_RS07185	pyruvate kinase 1499467:1500975 reverse MW:54255	Regular	139672800	0	543119936	245	25	33	58.76	1453782	784034	666479	0	28	Pass2	InSource	None	5863307	PVGTGR	VALASGLVESGDNIIIVAGVPVGTGR	486	6	11.05	263	2	2	0	0	1465795	0.0000	Identified	484	0.0	b6y6	395208	532	793781042037651	11875620840753	0.0021	Green	32296	5863297	5863316	364224	3008	3008.00	1.00	1	5863297
NCDO2118_RS07185	pyruvate kinase 1499467:1500975 reverse MW:54255	Regular	139672800	0	543119936	245	25	33	58.76	1453782	784034	666479	0	29	Pass2	InSource	None	8683982	SMTYNPR	IVVTATNMLESMTYNPR	312	7	9.84	261	3	3	0	0	23490100	0.0000	Missing	1592	0.0	b7y3*y5y7	312595	765	101127031163723	162254062327446	0.0016	Green	21710	8683992	8684011	317002	2332	2332.00	1.24	1	8683992
NCDO2118_RS07185	pyruvate kinase 1499467:1500975 reverse MW:54255	Regular	139672800	0	543119936	245	25	33	58.76	1453782	784034	666479	0	30	Pass2	InSource	None	4182660	LTGK	LGLSLTGK	159	4	10.10	255	3	3	2	0	32215360	0.0000		283	0.0	y2y3y4	172711	400	656346179692648	912692359385296	0.0013	Green	3048	4182644	4182660	209542	1884	1884.00	1.00	1	4182644
NCDO2118_RS07185	pyruvate kinase 1499467:1500975 reverse MW:54255	Regular	139672800	0	543119936	245	25	33	58.76	1453782	784034	666479	0	31	Pass2	InSource	None	6503257	TYNPR	IVVTATNMLESMTYNPR	314	5	9.84	261	1	1	0	0	3537685	0.0000	Identified	84	0.0	b3y5*	312595	568	829198532217113	125839706443423	0.0013	Green	21716	6503260	6503279	317032	1850	1850.00	1.00	1	6503260
NCDO2118_RS07185	pyruvate kinase 1499467:1500975 reverse MW:54255	Regular	139672800	0	543119936	245	25	33	58.76	1453782	784034	666479	0	32	Pass2	InSource	None	5492780	YNPR	IVVTATNMLESMTYNPR	315	4	9.84	261	4	4	1	0	49442760	0.0000	Identified	828	0.0	b2y1y3y3*y4	312595	475	736018460525308	107203692105062	0.0010	Green	21702	5492771	5492790	316983	1502	1502.00	1.00	1	5492771
NCDO2118_RS07185	pyruvate kinase 1499467:1500975 reverse MW:54255	Regular	139672800	0	543119936	245	25	33	58.76	1453782	784034	666479	0	33	Pass2	InSource	None	8304441	IVVTATNM	IVVTATNMLESMTYNPR	302	8	6.13	261	0	0	0	0	1401775	0.0000		0	0.0		312595	807	104795344739875	16959068947975	0.0008	Green	21697	8304412	8304430	316969	1139	1139.00	1.00	1	8304412
NCDO2118_RS07185	pyruvate kinase 1499467:1500975 reverse MW:54255	Regular	139672800	0	543119936	245	25	33	58.76	1453782	784034	666479	0	34	Pass2	InSource	None	7813661	MTYNPR	IVVTATNMLESMTYNPR	313	6	9.84	261	2	2	0	0	3801816	0.0000	Missing	578	0.0	y4y4*y6	312595	692	945867631684957	149173526336991	0.0006	Green	21642	7813696	7813716	316744	843	843.00	1.00	1	7813696
NCDO2118_RS07185	pyruvate kinase 1499467:1500975 reverse MW:54255	Regular	17832340	0	543119936	67	10	33	34.06	91588	75869	31042	1	1	Pass1	PepFrag1	None	24643770	VALASGLVESGDNIIIVAGVPVGTGR	VALASGLVESGDNIIIVAGVPVGTGR	466	26	4.07	220	25	25	17	7	234876000	76220	Identified	21852	8.3	b2b3b5b6b7b7b8b9b11b12b13b13*b14b14*b14b15b15*b16b16*b18b19b20y4y6y7y8y9y10y11y12y18y26	423058	2359	214245443756502	102830295837668	0.6545	Green	6345	24643827	24643789	370291	59945	59945.00	2.89	3	8221324
NCDO2118_RS07185	pyruvate kinase 1499467:1500975 reverse MW:54255	Regular	17832340	0	543119936	67	10	33	34.06	91588	75869	31042	0	2	Pass1	PepFrag1	None	13447482	LIVALTESGNTAR	LIVALTESGNTAR	403	13	7.00	216	10	10	7	3	89253070	72018		2454	3.1	b2b3b4b5y5y6y7y7*y8y9y11	255219	1271	141858926121739	101858926121739	0.0874	Yellow	4159	13447505	13447512	231914	8004	8004.00	2.00	2	6728789
NCDO2118_RS07185	pyruvate kinase 1499467:1500975 reverse MW:54255	Regular	17832340	0	543119936	67	10	33	34.06	91588	75869	31042	0	3	Pass1	PepFrag1	None	10135778	IPFPALAER	IPFPALAER	192	9	7.00	218	7	7	4	1	16122290	64586	Identified	2609	2.7	b2b6y5y6y7y8y9	212133	954	117163377846316	771633778463164	0.0865	Yellow	4810	10135737	10135759	276611	7920	7920.00	2.00	2	5072905
NCDO2118_RS07185	pyruvate kinase 1499467:1500975 reverse MW:54255	Regular	17832340	0	543119936	67	10	33	34.06	91588	75869	31042	0	4	Pass1	PepFrag1	None	7043210	DDADIR	DDADIR	201	6	3.59	225	3	3	0	0	1052922	52736		1454	1.7	b3y2y6	54222	612	871486336156241	134297267231248	0.0386	Red	949	7043218	7043232	99892	3534	3534.00	1.00	1	7043218
NCDO2118_RS07185	pyruvate kinase 1499467:1500975 reverse MW:54255	Regular	17832340	0	543119936	67	10	33	34.06	91588	75869	31042	0	5	Pass1	PepFrag1	None	12547416	IVSTLGPAVEIR	IVSTLGPAVEIR	6	12	7.00	217	6	6	4	1	64852560	70631	Identified	1057	2.2	b2b4y6y7y8y9y10	254189	1210	137282932554542	972829325545422	0.0354	Yellow	4477	12547416	12547428	252631	3238	3238.00	2.00	2	6278744
NCDO2118_RS07185	pyruvate kinase 1499467:1500975 reverse MW:54255	Regular	17832340	0	543119936	67	10	33	34.06	91588	75869	31042	0	6	Pass1	PepFrag1	None	19399616	IVVTATNMLESMTYNPR	IVVTATNMLESMTYNPR	302	17	7.00	219	6	6	1	0	7006389	60967	Missing	433	2.4	b7b8b10y5y8y11y12	305282	1805	179230165172554	139230165172554	0.0351	Red	5583	19399732	19399687	325375	3212	3212.00	2.39	2	9704902
NCDO2118_RS07185	pyruvate kinase 1499467:1500975 reverse MW:54255	Regular	17832340	0	543119936	67	10	33	34.06	91588	75869	31042	0	7	Pass1	PepFrag1	None	15168118	NIAALIEEGANVFR	NIAALIEEGANVFR	40	14	4.26	224	5	5	0	2	11898020	63267		477	1.9	b4b8y6y8y10	316317	1419	152667958378682	112667958378682	0.0205	Yellow	7190	15168115	15168111	416081	1878	1878.00	2.00	2	7589094
NCDO2118_RS07185	pyruvate kinase 1499467:1500975 reverse MW:54255	Regular	17832340	0	543119936	67	10	33	34.06	91588	75869	31042	0	8	Pass1	PepFrag1	None	33417363	STPELIALNVAGGLDIFDDVEIGQTILIDDGK	STPELIALNVAGGLDIFDDVEIGQTILIDDGK	123	32	3.23	223	2	2	0	0	5347790	59794	Missing	215	2.4	b8b11b13b14*	507228	3154	260016411449035	133344274299357	0.0167	Red	8131	33417280	33417147	506981	1526	1526.00	3.00	3	11145808
NCDO2118_RS07185	pyruvate kinase 1499467:1500975 reverse MW:54255	Regular	17832340	0	543119936	67	10	33	34.06	91588	75869	31042	0	9	Pass1	PepFrag1	None	26553294	IENQQGIENLDEIIEAADGIMIAR	IENQQGIENLDEIIEAADGIMIAR	250	24	3.43	222	2	2	0	0	2712634	56846		286	2.1	y7y10y12	382696	2475	221212553895603	107475035930402	0.0161	Red	7526	26553240	26553185	446955	1473	1473.00	3.00	3	8857795
NCDO2118_RS07185	pyruvate kinase 1499467:1500975 reverse MW:54255	Regular	17832340	0	543119936	67	10	33	34.06	91588	75869	31042	0	10	Pass1	PepFrag1	None	19230487	FGLSQPGGINFIAISFVR	FGLSQPGGINFIAISFVR	207	18	11.05	221	1	1	0	0	12956080	63637	Identified	205	1.5	b15*y7y13	421767	1811	179627131410996	139627131410996	0.0094	Yellow	7343	19230526	19230484	428841	858	858.00	2.00	2	9620299
NCDO2118_RS07185	pyruvate kinase 1499467:1500975 reverse MW:54255	Regular	18233790	0	543119936	45	8	33	20.92	299847	48318	18552	1	1	Pass1	PepFrag1	None	24643770	VALASGLVESGDNIIIVAGVPVGTGR	VALASGLVESGDNIIIVAGVPVGTGR	466	26	4.07	493	25	25	17	6	314608000	77586	Identified	13030	7.1	b2b3b5b6b7b8b9b10b12b13b14b14*b15b17b18b19b25*y4y6y7y8y9y10y11y12y17y26	385375	2359	214245443756502	102830295837668	0.1302	Green	15611	24643854	24643831	369206	39050	39050.00	2.90	3	8221333
NCDO2118_RS07185	pyruvate kinase 1499467:1500975 reverse MW:54255	Regular	18233790	0	543119936	45	8	33	20.92	299847	48318	18552	0	2	Pass1	PepFrag1	None	15347384	EFEVEAQNDGVIGK	EFEVEAQNDGVIGK	168	14	3.69	491	8	8	2	3	35468000	68107		760	2.7	b2b3b3b6b7b11*b12y2y3y7*y8y8*y12	222445	1395	150941654454293	110941654454293	0.0169	Green	7670	15347398	15347402	208434	5061	5061.00	2.00	2	7678736
NCDO2118_RS07185	pyruvate kinase 1499467:1500975 reverse MW:54255	Regular	18233790	0	543119936	45	8	33	20.92	299847	48318	18552	0	3	Pass1	PepFrag1	None	8424730	GVNIPNTK	GVNIPNTK	184	8	10.10	495	0	0	0	0	4822222	59441	Identified	64	2.1	y4*	109676	787	103056674068113	630566740681125	0.0140	Green	3550	8424720	8424739	164020	4207	4207.00	2.00	2	4217397
NCDO2118_RS07185	pyruvate kinase 1499467:1500975 reverse MW:54255	Regular	18233790	0	543119936	45	8	33	20.92	299847	48318	18552	0	4	Pass1	PepFrag1	None	13447482	LIVALTESGNTAR	LIVALTESGNTAR	403	13	7.00	492	3	3	0	0	4110886	58748		302	1.6	b3b12*b13y8y10	240217	1271	141858926121739	101858926121739	0.0040	Green	9672	13447394	13447405	229099	1202	1202.00	2.00	2	6728734
NCDO2118_RS07185	pyruvate kinase 1499467:1500975 reverse MW:54255	Regular	18233790	0	543119936	45	8	33	20.92	299847	48318	18552	0	5	Pass1	PepFrag1	None	33417363	STPELIALNVAGGLDIFDDVEIGQTILIDDGK	STPELIALNVAGGLDIFDDVEIGQTILIDDGK	123	32	3.23	494	4	4	0	0	12030680	63412	Missing	298	2.2	b7b11y4y10y11*y12	481302	3154	260016411449035	133344274299357	0.0040	Green	16972	33417400	33417239	506865	1198	1198.00	3.00	3	11145848
NCDO2118_RS07185	pyruvate kinase 1499467:1500975 reverse MW:54255	Regular	18233790	0	543119936	45	8	33	20.92	299847	48318	18552	0	6	Pass2	VarMod	Phosphoryl STY(8)	14247145	LIVALTESGNTAR	LIVALTESGNTAR	403	13	7.00	497	2	2	0	0	594852	50353		2625	8.5	b8b10b12*b13y6-H3PO4y9y12	240217	1271	141858926121739	101858926121739	0.4279	Yellow	5177	14247042	14247050	181206	128309	128309.00	1.90	2	7128557
NCDO2118_RS07185	pyruvate kinase 1499467:1500975 reverse MW:54255	Regular	18233790	0	543119936	45	8	33	20.92	299847	48318	18552	0	7	Pass2	VarMod	Phosphoryl STY(6)	14247145	LIVALTESGNTAR	LIVALTESGNTAR	403	13	7.00	498	3	3	0	0	5664317	60140		1253	8.3	b8b9-H3PO4b10*b11b13y4y6y8-H3PO4y9*y10-H3PO4y11y12*y12	240217	1271	141858926121739	101858926121739	0.3963	Green	11664	14247079	14247087	254732	118830	118830.00	1.55	2	7128576
NCDO2118_RS07185	pyruvate kinase 1499467:1500975 reverse MW:54255	Regular	18233790	0	543119936	45	8	33	20.92	299847	48318	18552	0	8	Pass2	VarMod	Phosphoryl STY(*)	12706290	STVTEVVAASVK	STVTEVVAASVK	382	12	7.00	496	0	0	0	0	1149629	53214		220	1.8	b3-H3PO4b8-H3PO4b11y8	193598	1130	131163177712208	911631777122084	0.0066	Yellow	7821	12706318	12706331	209957	1990	1990.00	2.00	2	6358195
NCDO2118_RS07185	pyruvate kinase 1499467:1500975 reverse MW:54255	Regular	12893250	0	543119936	38	6	33	19.72	111809	22258	20129	1	1	Pass1	PepFrag1	None	24643770	VALASGLVESGDNIIIVAGVPVGTGR	VALASGLVESGDNIIIVAGVPVGTGR	466	26	4.07	816	16	16	10	3	232831900	74774	Identified	5104	5.1	b3b4b7b8b10b13b13b14b15b20y6y7y8y9y10y11y12	372413	2359	214245443756502	102830295837668	0.1404	Green	16139	24643758	24643749	368771	15702	15702.00	2.87	3	8221301
NCDO2118_RS07185	pyruvate kinase 1499467:1500975 reverse MW:54255	Regular	12893250	0	543119936	38	6	33	19.72	111809	22258	20129	0	2	Pass1	PepFrag1	None	15347384	EFEVEAQNDGVIGK	EFEVEAQNDGVIGK	168	14	3.69	814	6	6	3	0	8727114	60512		603	2.3	b3b4b9y2y3y8y9y9	222269	1395	150941654454293	110941654454293	0.0306	Green	6754	15347449	15347453	207844	3424	3424.00	2.00	2	7678761
NCDO2118_RS07185	pyruvate kinase 1499467:1500975 reverse MW:54255	Regular	12893250	0	543119936	38	6	33	19.72	111809	22258	20129	0	3	Pass1	PepFrag1	None	18088913	TELFADGADAISVVTGDK	TELFADGADAISVVTGDK	95	18	3.50	815	6	6	2	0	16477940	63273		602	2.5	b3b16y4y5y7y13y14	304077	1666	169906358587853	129906358587853	0.0280	Green	13356	18088924	18088907	288993	3132	3132.00	2.00	2	9049499
NCDO2118_RS07185	pyruvate kinase 1499467:1500975 reverse MW:54255	Regular	12893250	0	543119936	38	6	33	19.72	111809	22258	20129	0	4	Pass2	MissedCleavage	None	22681475	IVVTATNMLESMTYNPRATR	IVVTATNMLESMTYNPRATR	302	20	9.84	817	8	8	1	0	9801438	61017	Missing	13485	8.6	b2b8b9*b10b11b13y3y8y9*y10y12y17y18y20y20*	277107	2113	199079236075698	927194907171321	0.7702	Green	12386	22681212	22681215	273021	86112	86112.00	2.90	3	7567119
NCDO2118_RS07185	pyruvate kinase 1499467:1500975 reverse MW:54255	Regular	12893250	0	543119936	38	6	33	19.72	111809	22258	20129	0	5	Pass2	VarMod	Phosphoryl STY(*)	12706290	STVTEVVAASVK	STVTEVVAASVK	382	12	7.00	818	0	0	0	0	1785763	53622		76	2.0	b7y5	201849	1130	131163177712208	911631777122084	0.0225	Yellow	7940	12706322	12706340	219247	2519	2519.00	2.00	2	6358198
NCDO2118_RS07185	pyruvate kinase 1499467:1500975 reverse MW:54255	Regular	12893250	0	543119936	38	6	33	19.72	111809	22258	20129	0	6	Pass2	VarMod	Phosphoryl STY(*)	22140723	STVTEVVAASVKNAAEAMDIK	STVTEVVAASVKNAAEAMDIK	382	21	4.44	819	2	2	0	0	2746420	55491		259	1.7	b11y6y8y14*	274280	2010	19255597788594	883706519239597	0.0082	Yellow	13329	22140713	22140718	288273	920	920.00	3.00	3	7386953
NCDO2118_RS07185	pyruvate kinase 1499467:1500975 reverse MW:54255	Regular	44339810	0	543119936	95	12	33	36.65	256766	235601	196595	1	1	Pass1	PepFrag1	None	26553294	IENQQGIENLDEIIEAADGIMIAR	IENQQGIENLDEIIEAADGIMIAR	250	24	3.43	313	28	28	25	8	431100400	82814		65666	11.2	b2b3b4b5b5*b5b6b6*b6b7b7*b7b8b8*b9*b9b10b10*b11b11*b11b12b12*b12b13b13*b13b14b14b15b16b17y2y3y4y5y6y7y7y8y9y10y11y12y13y14	372157	2475	221212553895603	107475035930402	0.5707	Green	17859	26553297	26553252	444295	146540	146540.00	2.97	3	8857814
NCDO2118_RS07185	pyruvate kinase 1499467:1500975 reverse MW:54255	Regular	44339810	0	543119936	95	12	33	36.65	256766	235601	196595	0	2	Pass1	PepFrag1	Carbamidomethyl C(2)	17088687	ICEETGNPHVQLLAK	ICEETGNPHVQLLAK	235	15	5.30	314	24	24	19	8	569959100	84026	Identified	122108	7.6	b2b3b4b7b7*b7b10b11b11b12b12*b12b13*b14b15b15*y1y2y3y4y5y5*y6y7y8y9y10y11y11y12y12*y12y13y13*y13y14y14*y15	200171	1542	161367430379895	121367430379895	0.3111	Green	3842	17088701	17088691	197332	79868	79868.00	2.22	2	8549387
NCDO2118_RS07185	pyruvate kinase 1499467:1500975 reverse MW:54255	Regular	44339810	0	543119936	95	12	33	36.65	256766	235601	196595	0	3	Pass1	PepFrag1	None	24643770	VALASGLVESGDNIIIVAGVPVGTGR	VALASGLVESGDNIIIVAGVPVGTGR	466	26	4.07	312	11	11	3	2	64226860	74545	Identified	2975	4.2	b7b10b13b14b14*b15b20y6y8y10y11y26	366751	2359	214245443756502	102830295837668	0.0358	Green	15930	24643721	24643696	368382	9193	9193.00	2.85	3	8221289
NCDO2118_RS07185	pyruvate kinase 1499467:1500975 reverse MW:54255	Regular	44339810	0	543119936	95	12	33	36.65	256766	235601	196595	0	4	Pass1	PepFrag1	None	18088913	TELFADGADAISVVTGDK	TELFADGADAISVVTGDK	95	18	3.50	311	14	14	6	4	77347840	75352		2241	3.0	b2b3b4b6b6b11b13y4y10y10y11y12y14y15y16y18	308760	1666	169906358587853	129906358587853	0.0211	Green	13631	18088961	18088943	322685	5430	5430.00	2.00	2	9049517
NCDO2118_RS07185	pyruvate kinase 1499467:1500975 reverse MW:54255	Regular	44339810	0	543119936	95	12	33	36.65	256766	235601	196595	0	5	Pass1	PepFrag1	None	13106521	NAQTMLKEYGR	NAQTMLKEYGR	363	11	9.72	315	2	2	1	0	1171458	57155		218	1.4	b6b7y7	137143	1199	136449649027853	964496490278527	0.0039	Green	2868	13106486	13106502	183327	989	989.00	2.00	2	6558279
NCDO2118_RS07185	pyruvate kinase 1499467:1500975 reverse MW:54255	Regular	44339810	0	543119936	95	12	33	36.65	256766	235601	196595	0	6	Pass1	PepFrag1	None	16988810	IPFPALAERDDADIR	IPFPALAERDDADIR	192	15	3.97	310	2	2	1	0	13109160	67644	Identified	311	1.4	y12y13	270644	1566	163037487006469	686916580043129	0.0029	Green	9890	16988867	16988894	271194	752	752.00	3.00	3	5669671
NCDO2118_RS07185	pyruvate kinase 1499467:1500975 reverse MW:54255	Regular	44339810	0	543119936	95	12	33	36.65	256766	235601	196595	0	7	Pass2	PepFrag2	None	15347384	EFEVEAQNDGVIGK	EFEVEAQNDGVIGK	168	14	3.69	321	2	2	0	0	2742627	60850		186	2.4	b11b12*y10y12	239364	1395	150941654454293	110941654454293	0.0145	Green	13776	15347940	15347943	325188	3727	3727.00	2.00	2	7679006
NCDO2118_RS07185	pyruvate kinase 1499467:1500975 reverse MW:54255	Regular	44339810	0	543119936	95	12	33	36.65	256766	235601	196595	0	8	Pass2	PepFrag2	None	31264832	GLMINWGVIPTMTEKPSSTDDMFEVAEK	GLMINWGVIPTMTEKPSSTDDMFEVAEK	438	28	3.92	316	0	0	0	0	1882453	59215	Missing	61	2.4	y8	384614	2895	245579444639063	123719629759375	0.0071	Green	17143	31265324	31265220	404515	1824	1824.00	3.00	3	10428490
NCDO2118_RS07185	pyruvate kinase 1499467:1500975 reverse MW:54255	Regular	44339810	0	543119936	95	12	33	36.65	256766	235601	196595	0	9	Pass2	VarMod	Oxidation M(21)	26713243	IENQQGIENLDEIIEAADGIMIAR	IENQQGIENLDEIIEAADGIMIAR	250	24	3.43	317	9	9	3	1	13908600	67901		1621	3.3	b5b7b8b12b15y6y8y8y9y10y11	372157	2475	221212553895603	107475035930402	0.0207	Green	16855	26713321	26713274	393470	5316	5316.00	2.89	3	8911156
NCDO2118_RS07185	pyruvate kinase 1499467:1500975 reverse MW:54255	Regular	44339810	0	543119936	95	12	33	36.65	256766	235601	196595	0	10	Pass2	VarMod	Oxidation M(12)	14787672	VGFLLDTKGPEMR	VGFLLDTKGPEMR	82	13	7.03	318	2	2	0	0	3435694	61828	Missing	329	1.5	b8y6y6y9	243329	1374	149423001520314	109423001520314	0.0046	Green	15515	14787672	14787679	358354	1171	1171.00	2.00	2	7398873
NCDO2118_RS07185	pyruvate kinase 1499467:1500975 reverse MW:54255	Regular	44339810	0	543119936	95	12	33	36.65	256766	235601	196595	0	11	Pass2	VarMod	Phosphoryl STY(*)	23481138	IVVTATNMLESMTYNPRATR	IVVTATNMLESMTYNPRATR	302	20	9.84	319	1	1	0	0	1036413	56623	Missing	808	1.7	b11*b12*y10y20	244086	2113	199079236075698	159079236075698	0.0042	Green	13056	23481209	23481130	312495	1080	1080.00	2.00	2	11745641
NCDO2118_RS07185	pyruvate kinase 1499467:1500975 reverse MW:54255	Regular	44339810	0	543119936	95	12	33	36.65	256766	235601	196595	0	12	Pass2	VarMod	Oxidation M(5)	13266470	NAQTMLKEYGR	NAQTMLKEYGR	363	11	9.72	320	0	0	0	0	1555073	58385		71	1.3	b8*y9*	137143	1199	136449649027853	964496490278527	0.0034	Green	8967	13266535	13266550	259784	876	876.00	2.00	2	6638304
NCDO2118_RS07185	pyruvate kinase 1499467:1500975 reverse MW:54255	Regular	127972200	0	543119936	238	24	33	61.55	1338597	701492	704687	1	1	Pass1	PepFrag1	None	24643770	VALASGLVESGDNIIIVAGVPVGTGR	VALASGLVESGDNIIIVAGVPVGTGR	466	26	4.07	242	30	30	20	7	555732000	88520	Identified	132870	14.8	b2b3b4b5b7b7b8b8b10b11b11b12b13b14b14*b15b15*b16b16*b17b17b18b19b26y1y2y4y6y6y7y8y9y9y10y10y11y12y16y17y19y21*y26	401111	2359	214245443756502	102830295837668	0.2187	Green	31081	24643831	24643838	364816	292775	292775.00	2.74	3	8221325
NCDO2118_RS07185	pyruvate kinase 1499467:1500975 reverse MW:54255	Regular	127972200	0	543119936	238	24	33	61.55	1338597	701492	704687	0	2	Pass1	PepFrag1	None	12547416	IVSTLGPAVEIR	IVSTLGPAVEIR	6	12	7.00	248	19	19	14	6	283056800	85590	Identified	263417	10.2	b2b3b3b4b4b5b5b6b6b7b8b9b12b12y1y2y3y3y4y5y7y8y9y9y10y10y11y12	263317	1210	137282932554542	972829325545422	0.1704	Green	7148	12547456	12547481	245516	228062	228062.00	1.92	2	6278764
NCDO2118_RS07185	pyruvate kinase 1499467:1500975 reverse MW:54255	Regular	127972200	0	543119936	238	24	33	61.55	1338597	701492	704687	0	3	Pass1	PepFrag1	None	19399616	IVVTATNMLESMTYNPR	IVVTATNMLESMTYNPR	302	17	7.00	240	27	27	21	10	1174032000	91768	Identified	59684	10.7	b2b3b4b4b5b5b6b6b7b7b8b9b10b11b11b12*b14b14b17b17*y1y2y3y4y5y5*y6y6y7y7y8y8*y8y9y10y11y12y13y14y14*y15y15*y15y17	310350	1805	179230165172554	139230165172554	0.1350	Green	20724	19399641	19399641	317732	180655	180655.00	2.32	2	9704857
NCDO2118_RS07185	pyruvate kinase 1499467:1500975 reverse MW:54255	Regular	127972200	0	543119936	238	24	33	61.55	1338597	701492	704687	0	4	Pass1	PepFrag1	None	8925138	VGFLLDTK	VGFLLDTK	82	8	6.78	239	9	9	5	2	330522700	86263		64931	7.5	b4b5b6b6b7b7y2y3y4y6y6y7y7y8	246480	855	108910656856658	177821313713317	0.1092	Green	8478	8925141	8925166	254755	146179	146179.00	1.00	1	8925141
NCDO2118_RS07185	pyruvate kinase 1499467:1500975 reverse MW:54255	Regular	127972200	0	543119936	238	24	33	61.55	1338597	701492	704687	0	5	Pass1	PepFrag1	None	7884876	LGLSLTGK	LGLSLTGK	155	8	10.10	237	12	12	8	3	197834400	84034		45368	7.1	b3b4b4b5b5b6b7b7b8b8y1y2y3y4y5y6y7y7y8	163469	769	101479237201927	162958474403854	0.0931	Green	3085	7884865	7884890	208317	124670	124670.00	1.00	1	7884865
NCDO2118_RS07185	pyruvate kinase 1499467:1500975 reverse MW:54255	Regular	127972200	0	543119936	238	24	33	61.55	1338597	701492	704687	0	6	Pass1	PepFrag1	None	15168118	NIAALIEEGANVFR	NIAALIEEGANVFR	40	14	4.26	244	18	18	14	6	525308500	88275		41904	8.3	b2b3b3*b4b4*b5b5*b6b7b12b14y1y3y4y4*y5y6y7y7*y8y8y9y9*y10y10y11y12y12	356476	1419	152667958378682	112667958378682	0.0815	Green	37215	15168104	15168122	403181	109045	109045.00	2.05	2	7589088
NCDO2118_RS07185	pyruvate kinase 1499467:1500975 reverse MW:54255	Regular	127972200	0	543119936	238	24	33	61.55	1338597	701492	704687	0	7	Pass1	PepFrag1	None	19230487	FGLSQPGGINFIAISFVR	FGLSQPGGINFIAISFVR	207	18	11.05	245	16	16	8	4	277033500	85496	Identified	29943	7.3	b4b4b5b5b9b11b11b17y3y4y6y7y8y9y13y13*y14y15y16y18	416840	1811	179627131410996	139627131410996	0.0445	Green	39272	19230527	19230528	422840	59607	59607.00	2.13	2	9620300
NCDO2118_RS07185	pyruvate kinase 1499467:1500975 reverse MW:54255	Regular	127972200	0	543119936	238	24	33	61.55	1338597	701492	704687	0	8	Pass1	PepFrag1	None	31264832	GLMINWGVIPTMTEKPSSTDDMFEVAEK	GLMINWGVIPTMTEKPSSTDDMFEVAEK	438	28	3.92	243	20	20	10	5	126514100	82093	Identified	31992	8.1	b3b4b5b5*b6b6*b7b8b9b12b12*b13b13*b14*b15b18b20b21b27y2y19y20y22y24y25y28	434757	2895	245579444639063	123719629759375	0.0392	Green	35249	31264948	31264896	386793	52532	52532.00	2.96	3	10428365
NCDO2118_RS07185	pyruvate kinase 1499467:1500975 reverse MW:54255	Regular	127972200	0	543119936	238	24	33	61.55	1338597	701492	704687	0	9	Pass1	PepFrag1	Carbamidomethyl C(2)	17088687	ICEETGNPHVQLLAK	ICEETGNPHVQLLAK	235	15	5.30	236	14	14	6	1	97871880	80978	Identified	5636	5.2	b2b9b11b12y2y3y5y7y8y10y10*y11y12y12*y12y13y14y14y15	196434	1542	161367430379895	6757828691993	0.0217	Green	1835	17088577	17088619	185959	29003	29003.00	2.93	3	5702907
NCDO2118_RS07185	pyruvate kinase 1499467:1500975 reverse MW:54255	Regular	127972200	0	543119936	238	24	33	61.55	1338597	701492	704687	0	10	Pass1	PepFrag1	None	26553294	IENQQGIENLDEIIEAADGIMIAR	IENQQGIENLDEIIEAADGIMIAR	250	24	3.43	246	17	17	9	1	109400600	81461		5354	5.1	b1b2b4b6b7b10*b12b12*b13b14*b18y1y2y3y4y6y7y8y9y10y11y14	423280	2475	221212553895603	107475035930402	0.0129	Green	41338	26553295	26553287	442471	17300	17300.00	2.98	3	8857814
NCDO2118_RS07185	pyruvate kinase 1499467:1500975 reverse MW:54255	Regular	127972200	0	543119936	238	24	33	61.55	1338597	701492	704687	0	11	Pass1	PepFrag1	None	15347384	EFEVEAQNDGVIGK	EFEVEAQNDGVIGK	168	14	3.69	249	3	3	0	0	5269129	68289		2085	3.9	b2b8b14y13*y14	247891	1395	150941654454293	110941654454293	0.0104	Green	8835	15347288	15347306	257628	13918	13918.00	2.00	2	7678680
NCDO2118_RS07185	pyruvate kinase 1499467:1500975 reverse MW:54255	Regular	127972200	0	543119936	238	24	33	61.55	1338597	701492	704687	0	12	Pass1	PepFrag1	None	13447482	LIVALTESGNTAR	LIVALTESGNTAR	403	13	7.00	250	5	5	1	1	40473030	77143		1734	3.2	b3b4b6b10b12*y8y10	230413	1271	141858926121739	101858926121739	0.0063	Green	5167	13447464	13447487	229649	8383	8383.00	2.00	2	6728768
NCDO2118_RS07185	pyruvate kinase 1499467:1500975 reverse MW:54255	Regular	127972200	0	543119936	238	24	33	61.55	1338597	701492	704687	0	13	Pass1	PepFrag1	None	33417363	STPELIALNVAGGLDIFDDVEIGQTILIDDGK	STPELIALNVAGGLDIFDDVEIGQTILIDDGK	123	32	3.23	247	4	4	0	0	36715600	76720	Missing	3343	4.2	b6b10b19b19*b27y4y5y6y26y32	527978	3154	260016411449035	133344274299357	0.0054	Green	46050	33417415	33417338	506870	7290	7290.00	2.68	3	11145853
NCDO2118_RS07185	pyruvate kinase 1499467:1500975 reverse MW:54255	Regular	127972200	0	543119936	238	24	33	61.55	1338597	701492	704687	0	14	Pass1	PepFrag1	None	11906627	STVTEVVAASVK	STVTEVVAASVK	382	12	7.00	238	5	5	0	1	9208578	70713		592	2.4	b2b2b3b4y4y6y8	227178	1130	131163177712208	911631777122084	0.0032	Green	3846	11906671	11906697	217755	4239	4239.00	2.00	2	5958372
NCDO2118_RS07185	pyruvate kinase 1499467:1500975 reverse MW:54255	Regular	127972200	0	543119936	238	24	33	61.55	1338597	701492	704687	0	15	Pass1	PepFrag1	None	19389340	GDMGIEVPFEMVPVYQK	GDMGIEVPFEMVPVYQK	274	17	3.83	241	4	4	0	1	15792770	73056	Identified	1416	2.5	b7b7y5y10y12	395718	1797	178700191922053	138700191922053	0.0025	Green	30195	19389458	19389458	360597	3340	3340.00	2.00	2	9699765
NCDO2118_RS07185	pyruvate kinase 1499467:1500975 reverse MW:54255	Regular	127972200	0	543119936	238	24	33	61.55	1338597	701492	704687	0	16	Pass1	PepFrag1	None	17399075	HRPNADILAITFDEK	HRPNADILAITFDEK	420	15	5.28	251	3	3	0	1	5340219	68347	Identified	845	1.9	b2b6b7b9y5y7y8y9	244482	1612	166214787680525	708098584536835	0.0014	Green	29306	17399109	17399151	356819	1870	1870.00	2.81	3	5806418
NCDO2118_RS07185	pyruvate kinase 1499467:1500975 reverse MW:54255	Regular	127972200	0	543119936	238	24	33	61.55	1338597	701492	704687	0	17	Pass2	MissedCleavage	None	17860433	LIVALTESGNTARLISK	LIVALTESGNTARLISK	403	17	10.12	253	1	1	0	0	2337164	64758		90	2.3	b9b17	285720	1727	1740288268534	760192179022667	0.0021	Green	14917	17860415	17860456	292183	2783	2783.00	3.16	3	5960187
NCDO2118_RS07185	pyruvate kinase 1499467:1500975 reverse MW:54255	Regular	127972200	0	543119936	238	24	33	61.55	1338597	701492	704687	0	18	Pass2	MissedCleavage	None	35106953	VERGLMINWGVIPTMTEKPSSTDDMFEVAEK	VERGLMINWGVIPTMTEKPSSTDDMFEVAEK	435	31	4.13	254	1	1	0	0	2434273	64935	Missing	247	2.8	b16y5	400511	3257	265646933244262	928234666221312	0.0019	Green	33998	35106915	35106862	379327	2572	2572.00	4.00	4	8784283
NCDO2118_RS07185	pyruvate kinase 1499467:1500975 reverse MW:54255	Regular	127972200	0	543119936	238	24	33	61.55	1338597	701492	704687	0	19	Pass2	MissedCleavage	None	21341060	STVTEVVAASVKNAAEAMDIK	STVTEVVAASVKNAAEAMDIK	382	21	4.44	252	4	4	0	1	9029819	70628		835	1.6	b14b17b17b19*y6y7y15y18*	318495	2010	19255597788594	15255597788594	0.0006	Green	26645	21340844	21340831	344995	760	760.00	2.00	2	10675458
NCDO2118_RS07185	pyruvate kinase 1499467:1500975 reverse MW:54255	Regular	127972200	0	543119936	238	24	33	61.55	1338597	701492	704687	0	20	Pass2	VarMod	Phosphoryl STY(10)	12706290	STVTEVVAASVK	STVTEVVAASVK	382	12	7.00	255	4	4	1	0	1750455	63503		1248	2.7	b5b10b10-H3PO4y11y12	227178	1130	131163177712208	911631777122084	0.0047	Green	3369	12706314	12706338	212515	6230	6230.00	2.00	2	6358193
NCDO2118_RS07185	pyruvate kinase 1499467:1500975 reverse MW:54255	Regular	127972200	0	543119936	238	24	33	61.55	1338597	701492	704687	0	21	Pass2	VarMod	Phosphoryl STY(3)	9244914	VATKQGLK	VATKQGLK	115	8	10.60	257	2	2	0	0	3574760	66604		758	1.5	b5b8-H3PO4y2y7*y8	28556	821	106003874422626	660038744226262	0.0014	Green	11372	9244856	9244883	272938	1844	1844.00	1.67	2	4627464
NCDO2118_RS07185	pyruvate kinase 1499467:1500975 reverse MW:54255	Regular	127972200	0	543119936	238	24	33	61.55	1338597	701492	704687	0	22	Pass2	VarMod	Phosphoryl STY(5)	15618713	VKIVSTLGPAVEIR	VKIVSTLGPAVEIR	4	14	10.12	256	1	1	0	0	1817931	63667	Missing	443	1.8	b5b7y14	335350	1450	154883433993154	114883433993154	0.0013	Green	43326	15618722	15618739	464470	1718	1718.00	2.37	2	7814398
NCDO2118_RS07185	pyruvate kinase 1499467:1500975 reverse MW:54255	Regular	127972200	0	543119936	238	24	33	61.55	1338597	701492	704687	0	23	Pass2	VarMod	Phosphoryl STY(9)	11785929	QKGVNIPNTK	QKGVNIPNTK	182	10	10.60	258	2	2	0	0	2971872	65801	Identified	255	1.3	b6y7y4-H3PO4	105784	1036	123784463240813	837844632408126	0.0007	Green	19072	11785844	11785870	311060	878	878.00	2.00	2	5897959
NCDO2118_RS07185	pyruvate kinase 1499467:1500975 reverse MW:54255	Regular	127972200	0	543119936	238	24	33	61.55	1338597	701492	704687	0	24	Pass2	VarMod	Phosphoryl STY(1);Phosphoryl STY(2)	22940386	STVTEVVAASVKNAAEAMDIK	STVTEVVAASVKNAAEAMDIK	382	21	4.44	259	0	0	0	0	3698087	66751		711	1.6	b3b17-H3PO4y4y7y9y17*y18	318495	2010	19255597788594	15255597788594	0.0006	Green	33335	22940313	22940289	375812	750	750.00	2.34	2	11475193
NCDO2118_RS07185	pyruvate kinase 1499467:1500975 reverse MW:54255	Regular	127972200	0	543119936	238	24	33	61.55	1338597	701492	704687	0	25	Pass2	InSource	None	5052980	SLTGK	LGLSLTGK	158	5	10.10	237	9	9	7	3	284457100	0.0000		6544	0.0	b2b3b3b4b4b5b5y1y2y3y3y4y4y5	163469	473	73395099123788	106790198247576	0.0214	Green	3078	5052973	5052994	208284	28705	28705.00	1.00	1	5052973
NCDO2118_RS07185	pyruvate kinase 1499467:1500975 reverse MW:54255	Regular	127972200	0	543119936	238	24	33	61.55	1338597	701492	704687	0	26	Pass2	InSource	None	5713450	IVSTLG	IVSTLGPAVEIR	6	6	6.13	248	0	0	0	0	763453	0.0000		0	0.0		263317	567	828225008705113	125645001741023	0.0018	Green	7098	5713421	5713443	245288	2406	2406.00	1.00	1	5713421
NCDO2118_RS07185	pyruvate kinase 1499467:1500975 reverse MW:54255	Regular	127972200	0	543119936	238	24	33	61.55	1338597	701492	704687	0	27	Pass2	InSource	None	6633573	GANVFR	NIAALIEEGANVFR	48	6	11.05	244	2	2	0	0	1360331	0.0000		164	0.0	b3b5y6*	356476	599	85910091671144	131820183342288	0.0016	Green	37255	6633563	6633587	403704	2176	2176.00	1.00	1	6633563
NCDO2118_RS07185	pyruvate kinase 1499467:1500975 reverse MW:54255	Regular	127972200	0	543119936	238	24	33	61.55	1338597	701492	704687	0	28	Pass2	InSource	None	9214425	EEGANVFR	NIAALIEEGANVFR	46	8	4.26	244	0	0	0	0	860472	0.0000		0	0.0		356476	817	105659286072213	171318572144426	0.0013	Green	37210	9214392	9214417	403166	1789	1789.00	1.00	1	9214392
NCDO2118_RS07185	pyruvate kinase 1499467:1500975 reverse MW:54255	Regular	127972200	0	543119936	238	24	33	61.55	1338597	701492	704687	0	29	Pass2	InSource	None	9125261	VAGVPVGTGR	VALASGLVESGDNIIIVAGVPVGTGR	482	10	11.05	242	2	2	0	0	1237193	0.0000	Missing	1192	0.0	b10y10	401111	857	109080431890802	178160863781604	0.0013	Green	31095	9125191	9125216	364882	1788	1788.00	1.18	1	9125191
NCDO2118_RS07185	pyruvate kinase 1499467:1500975 reverse MW:54255	Regular	127972200	0	543119936	238	24	33	61.55	1338597	701492	704687	0	30	Pass2	InSource	None	6503257	TYNPR	IVVTATNMLESMTYNPR	314	5	9.84	240	1	1	0	0	614029	0.0000	Missing	56	0.0	b2	310350	568	829198532217113	125839706443423	0.0013	Green	20674	6503238	6503261	317590	1706	1706.00	1.00	1	6503238
NCDO2118_RS07185	pyruvate kinase 1499467:1500975 reverse MW:54255	Regular	127972200	0	543119936	238	24	33	61.55	1338597	701492	704687	0	31	Pass2	InSource	None	5492780	YNPR	IVVTATNMLESMTYNPR	315	4	9.84	240	2	2	0	0	1380361	0.0000	Identified	520	0.0	b2b2*y4	310350	475	736018460525308	107203692105062	0.0008	Green	20684	5492754	5492775	317618	1066	1066.00	1.00	1	5492754
NCDO2118_RS07185	pyruvate kinase 1499467:1500975 reverse MW:54255	Regular	127972200	0	543119936	238	24	33	61.55	1338597	701492	704687	0	32	Pass2	InSource	None	4172496	VGFL	VGFLLDTK	82	4	6.13	239	0	0	0	0	385185	0.0000		0	0.0		246480	412	669408328781834	938816657563668	0.0007	Green	8452	4172485	4172503	254610	880	880.00	1.00	1	4172485
NCDO2118_RS07185	pyruvate kinase 1499467:1500975 reverse MW:54255	Regular	127972200	0	543119936	238	24	33	61.55	1338597	701492	704687	0	33	Pass2	InSource	None	5352987	NVFR	NIAALIEEGANVFR	50	4	11.05	244	1	1	0	0	368030	0.0000		510	0.0	y4y4*	356476	484	74528642116772	109057284233544	0.0006	Green	37231	5352930	5352951	403344	859	859.00	1.00	1	5352930
NCDO2118_RS07185	pyruvate kinase 1499467:1500975 reverse MW:54255	Regular	127972200	0	543119936	238	24	33	61.55	1338597	701492	704687	0	34	Pass2	InSource	None	10345265	IEEGANVFR	NIAALIEEGANVFR	45	9	4.26	244	0	0	0	0	1058538	0.0000		0	0.0		356476	941	116096568442657	192193136885315	0.0006	Green	37237	10345235	10345260	403445	819	819.00	1.00	1	10345235
NCDO2118_RS07185	pyruvate kinase 1499467:1500975 reverse MW:54255	Regular	5532357	0.47	543119936	21	5	33	10.16	33445	28254	3881	1	1	Pass1	PepFrag1	None	15347384	EFEVEAQNDGVIGK	EFEVEAQNDGVIGK	168	14	3.69	1466	7	7	2	1	15080690	59213		888	3.6	b3b4b5b7b9b10*b11b12*y9y10*y10y12	230402	1395	150941654454293	110941654454293	0.3388	Green	8674	15347461	15347468	208250	11332	11332.00	2.00	2	7678767
NCDO2118_RS07185	pyruvate kinase 1499467:1500975 reverse MW:54255	Regular	5532357	0.47	543119936	21	5	33	10.16	33445	28254	3881	0	2	Pass1	PepFrag1	None	24643770	VALASGLVESGDNIIIVAGVPVGTGR	VALASGLVESGDNIIIVAGVPVGTGR	466	26	4.07	1467	10	10	4	3	98400550	67359	Identified	1728	3.9	b13b14b15b17b20y6y9y10y11y26	360970	2359	214245443756502	102830295837668	0.2244	Green	17843	24643849	24643814	368902	7504	7504.00	2.84	3	8221331
NCDO2118_RS07185	pyruvate kinase 1499467:1500975 reverse MW:54255	Regular	5532357	0.47	543119936	21	5	33	10.16	33445	28254	3881	0	3	Pass2	PepFrag2	None	9624612	NAAEAMDIK	NAAEAMDIK	394	9	4.07	1470	2	2	0	0	855414	46751		914	1.3	y4y9	157117	880	111023457736826	182046915473652	0.0338	Red	5327	9624446	9624456	177623	1129	1129.00	1.00	1	9624446
NCDO2118_RS07185	pyruvate kinase 1499467:1500975 reverse MW:54255	Regular	5532357	0.47	543119936	21	5	33	10.16	33445	28254	3881	0	4	Pass2	VarMod	Oxidation M(5)	13266470	NAQTMLKEYGR	NAQTMLKEYGR	363	11	9.72	1468	2	2	0	0	1085941	47787		148	3.3	b2b7b8*	147049	1199	136449649027853	964496490278527	0.3482	Red	9878	13266390	13266404	218028	11647	11647.00	2.00	2	6638232
NCDO2118_RS07185	pyruvate kinase 1499467:1500975 reverse MW:54255	Regular	5532357	0.47	543119936	21	5	33	10.16	33445	28254	3881	0	5	Pass2	VarMod	Phosphoryl STY(4)	13906184	NAQTMLKEYGR	NAQTMLKEYGR	363	11	9.72	1469	0	0	0	0	2442113	51307		203	1.7	b5y8-H3PO4y10-H3PO4	147049	1199	136449649027853	964496490278527	0.0548	Yellow	5564	13906165	13906176	179787	1833	1833.00	2.00	2	6958119
NCDO2118_RS07185	pyruvate kinase 1499467:1500975 reverse MW:54255	Regular	4144932	1.43	543119936	25	7	33	15.34	14996	11286	4794	1	1	Pass1	PepFrag1	None	24643770	VALASGLVESGDNIIIVAGVPVGTGR	VALASGLVESGDNIIIVAGVPVGTGR	466	26	4.07	1675	11	11	6	3	63740090	64219	Identified	1967	3.4	b5b14b15b16y5y6y8y9y10y11y12y26	353793	2359	214245443756502	102830295837668	0.3306	Green	17075	24643754	24643746	369100	4958	4958.00	2.88	3	8221300
NCDO2118_RS07185	pyruvate kinase 1499467:1500975 reverse MW:54255	Regular	4144932	1.43	543119936	25	7	33	15.34	14996	11286	4794	0	2	Pass1	PepFrag1	None	18088913	TELFADGADAISVVTGDK	TELFADGADAISVVTGDK	95	18	3.50	1676	5	5	1	1	20484830	59290		315	2.3	b3b13y4y14y15	298986	1666	169906358587853	129906358587853	0.1711	Green	14330	18088952	18088939	288877	2566	2566.00	2.00	2	9049512
NCDO2118_RS07185	pyruvate kinase 1499467:1500975 reverse MW:54255	Regular	4144932	1.43	543119936	25	7	33	15.34	14996	11286	4794	0	3	Pass2	PepFrag2	None	20489883	DAATREFEVEAQNDGVIGK	DAATREFEVEAQNDGVIGK	163	19	3.92	1681	2	2	0	0	2883488	50774		891	1.6	b13*y8y13	253523	1861	18291832518074	81945550120493	0.0567	Yellow	12455	20489591	20489613	262465	850	850.00	3.00	3	6836579
NCDO2118_RS07185	pyruvate kinase 1499467:1500975 reverse MW:54255	Regular	4144932	1.43	543119936	25	7	33	15.34	14996	11286	4794	0	4	Pass2	MissedCleavage	None	21120608	TELFADGADAISVVTGDKFR	TELFADGADAISVVTGDKFR	95	20	3.97	1677	2	2	0	0	3052920	51022		189	2.4	b10y20	319848	1949	188640176287049	857601175246993	0.1698	Yellow	15885	21120841	21120859	325611	2547	2547.00	2.80	3	7046995
NCDO2118_RS07185	pyruvate kinase 1499467:1500975 reverse MW:54255	Regular	4144932	1.43	543119936	25	7	33	15.34	14996	11286	4794	0	5	Pass2	VarMod	Phosphoryl STY(10)	12706290	STVTEVVAASVK	STVTEVVAASVK	382	12	7.00	1680	4	4	1	0	2435494	50041		801	1.9	y6y8y11y12	196674	1130	131163177712208	911631777122084	0.1506	Yellow	8570	12706268	12706285	220823	2259	2259.00	2.00	2	6358170
NCDO2118_RS07185	pyruvate kinase 1499467:1500975 reverse MW:54255	Regular	4144932	1.43	543119936	25	7	33	15.34	14996	11286	4794	0	6	Pass2	VarMod	Phosphoryl STY(15)	20189003	GDMGIEVPFEMVPVYQK	GDMGIEVPFEMVPVYQK	274	17	3.83	1679	1	1	0	0	1014937	46240	Identified	541	1.6	b8b8b12y7*y11*y11y12	340202	1797	178700191922053	791334612813685	0.0701	Red	11237	20188974	20188998	249020	1051	1051.00	3.00	3	6736373
NCDO2118_RS07185	pyruvate kinase 1499467:1500975 reverse MW:54255	Regular	4144932	1.43	543119936	25	7	33	15.34	14996	11286	4794	0	7	Pass2	VarMod	Phosphoryl STY(*)	13827039	LGLSLTGKDAATR	LGLSLTGKDAATR	155	13	10.12	1678	0	0	0	0	933440	45876		90	1.3	b6b7	182970	1235	139167429587555	991674295875554	0.0510	Red	2124	13827059	13827071	154136	765	765.00	2.00	2	6918566
NCDO2118_RS07185	pyruvate kinase 1499467:1500975 reverse MW:54255	Regular	1539658	2.97	543119936	16	5	33	10.96	13716	9893	2046	1	1	Pass1	PepFrag1	None	15347384	EFEVEAQNDGVIGK	EFEVEAQNDGVIGK	168	14	3.69	1749	8	8	3	2	41852500	58091		1197	3.1	b3b3b4b5b11y2y3y7y8y9y10	235852	1395	150941654454293	110941654454293	0.5413	Green	6312	15347419	15347420	208866	7424	7424.00	2.00	2	7678746
NCDO2118_RS07185	pyruvate kinase 1499467:1500975 reverse MW:54255	Regular	1539658	2.97	543119936	16	5	33	10.96	13716	9893	2046	0	2	Pass1	PepFrag1	None	6473359	TANDVK	TANDVK	225	6	6.78	1751	2	2	0	0	1454579	43502		348	1.3	y4y6	74927	587	847588459822006	129517691964401	0.1097	Red	1289	6473351	6473368	127124	1505	1505.00	1.00	1	6473351
NCDO2118_RS07185	pyruvate kinase 1499467:1500975 reverse MW:54255	Regular	1539658	2.97	543119936	16	5	33	10.96	13716	9893	2046	0	3	Pass1	PepFrag1	None	24643770	VALASGLVESGDNIIIVAGVPVGTGR	VALASGLVESGDNIIIVAGVPVGTGR	466	26	4.07	1750	3	3	0	0	5180938	49018	Identified	139	1.8	y6y8y10	309702	2359	214245443756502	102830295837668	0.0703	Red	12394	24643887	24643876	369936	964	964.00	3.00	3	8221344
NCDO2118_RS07185	pyruvate kinase 1499467:1500975 reverse MW:54255	Regular	1539658	2.97	543119936	16	5	33	10.96	13716	9893	2046	0	4	Pass1	PepFrag1	None	9624612	NAAEAMDIK	NAAEAMDIK	394	9	4.07	1748	2	2	0	0	4837936	48721		130	1.2	y6y8	169846	880	111023457736826	710234577368262	0.0617	Red	2534	9624649	9624669	156368	846	846.00	2.00	2	4817361
NCDO2118_RS07185	pyruvate kinase 1499467:1500975 reverse MW:54255	Regular	1539658	2.97	543119936	16	5	33	10.96	13716	9893	2046	0	5	Pass2	VarMod	Carbamidomethyl C(3);Phosphoryl STY(6)	19449361	RICEETGNPHVQLLAK	RICEETGNPHVQLLAK	234	16	7.16	1752	1	1	0	0	879874	41318	Identified	232	2.3	b8-H3PO4b13y2y12*y16*	-7.79979e+17	1690	171534219430714	131534219430714	0.2170	Red	7942	19449311	19449285	229638	2977	2977.00	2.30	2	9729692
NCDO2118_RS07190	ATP-dependent 6-phosphofructokinase 1501063:1502085 reverse MW:35806	Regular	14712640	0	358627035	41	5	23	20.88	136420	109654	94577	1	1	Pass1	PepFrag1	None	10135738	DGIGGVAVGIR	DGIGGVAVGIR	277	11	7.00	597	15	15	11	5	351243000	77133		81622	7.2	b2b3b3b4b4b5b5b6b8b9b11b11y3y4y5y6y7y8y9y10y11	212302	956	117327071037588	773270710375882	0.6882	Green	7084	10135757	10135785	227149	93886	93886.00	1.78	2	5072915
NCDO2118_RS07190	ATP-dependent 6-phosphofructokinase 1501063:1502085 reverse MW:35806	Regular	14712640	0	358627035	41	5	23	20.88	136420	109654	94577	0	2	Pass1	PepFrag1	Carbamidomethyl C(19)	22691129	NAGDIALNAGIAAGADDICIPEK	NAGDIALNAGIAAGADDICIPEK	171	23	3.50	598	7	7	2	1	42481560	67959	Identified	862	3.8	b10b13y3y5y8y9y10	307921	2051	1951656614265	901104409510003	0.0594	Green	10897	22691148	22691126	295245	8102	8102.00	2.54	3	7570431
NCDO2118_RS07190	ATP-dependent 6-phosphofructokinase 1501063:1502085 reverse MW:35806	Regular	14712640	0	358627035	41	5	23	20.88	136420	109654	94577	0	3	Pass1	PepFrag1	None	7004352	AVELLR	AVELLR	271	6	7.00	600	4	4	0	0	11045560	62109		4247	2.3	b4y1y3y6	188289	677	932149161649599	14642983232992	0.0536	Green	4385	7004360	7004376	193026	7309	7309.00	1.00	1	7004360
NCDO2118_RS07190	ATP-dependent 6-phosphofructokinase 1501063:1502085 reverse MW:35806	Regular	14712640	0	358627035	41	5	23	20.88	136420	109654	94577	0	4	Pass2	PepFrag2	None	11906164	FENVVNNINK	FENVVNNINK	197	10	7.00	599	4	4	2	0	9527419	61467		902	2.8	y1y6y7y8y8*	180074	1097	128596965077436	885969650774356	0.0562	Green	2931	11906278	11906300	172024	7666	7666.00	2.00	2	5958175
NCDO2118_RS07190	ATP-dependent 6-phosphofructokinase 1501063:1502085 reverse MW:35806	Regular	14712640	0	358627035	41	5	23	20.88	136420	109654	94577	0	5	Pass2	VarMod	Phosphoryl STY(*)	22290522	KFGIEGVVVIGGDGSYHGAMR	KFGIEGVVVIGGDGSYHGAMR	90	21	7.74	601	2	2	0	0	3539472	57166		171	1.6	b7b8y20	280252	1992	19140466729043	876031115269536	0.0059	Yellow	8658	22290447	22290430	252054	803	803.00	3.00	3	7436864
NCDO2118_RS07190	ATP-dependent 6-phosphofructokinase 1501063:1502085 reverse MW:35806	Regular	14712640	0	358627035	41	5	23	20.88	136420	109654	94577	0	6	Pass2	InSource	None	6714199	GVAVGIR	DGIGGVAVGIR	281	7	11.05	597	4	4	0	0	6525983	0.0000		4413	0.0	b3b5b7y7	212302	645	902539276707172	140507855341434	0.0662	Green	7075	6714191	6714207	227097	9033	9033.00	1.00	1	6714191
NCDO2118_RS07190	ATP-dependent 6-phosphofructokinase 1501063:1502085 reverse MW:35806	Regular	14712640	0	358627035	41	5	23	20.88	136420	109654	94577	0	7	Pass2	InSource	None	5153300	AVGIR	DGIGGVAVGIR	283	5	11.05	597	5	5	2	1	20195860	0.0000		2360	0.0	b2b3y1y2y5	212302	492	75347648430133	110695296860266	0.0541	Green	7072	5153284	5153300	227085	7381	7381.00	1.00	1	5153284
NCDO2118_RS07190	ATP-dependent 6-phosphofructokinase 1501063:1502085 reverse MW:35806	Regular	14712640	0	358627035	41	5	23	20.88	136420	109654	94577	0	8	Pass2	InSource	None	7314087	KFGIEGV	KFGIEGVVVIGGDGSYHGAMR	90	7	7.00	601	0	0	0	0	481087	0.0000		0	0.0		280252	704	956771155022029	151354231004406	0.0164	Yellow	8675	7314049	7314064	252167	2240	2240.00	1.00	1	7314049
NCDO2118_RS07190	ATP-dependent 6-phosphofructokinase 1501063:1502085 reverse MW:35806	Regular	67304990	0	358627035	75	7	23	33.24	302961	272267	211785	1	1	Pass1	PepFrag1	None	20200386	YPEFAQVEGQLAGIEQLK	YPEFAQVEGQLAGIEQLK	72	18	3.96	168	28	28	22	10	564307400	85796	Missing	82817	10.0	b2b3b4b5b6b6*b7b7*b8b8b9b9b10b10*b10b11b11*b11b12b12b13b14b14b16b18b18*y1y2y3y3*y4y4y5y6y6*y7y8y9y9y10y10*y12y13y18	341729	1877	183965258881789	143965258881789	0.4782	Green	12116	20200447	20200401	341107	144885	144885.00	2.44	2	10105260
NCDO2118_RS07190	ATP-dependent 6-phosphofructokinase 1501063:1502085 reverse MW:35806	Regular	67304990	0	358627035	75	7	23	33.24	302961	272267	211785	0	2	Pass1	PepFrag1	None	10135738	DGIGGVAVGIR	DGIGGVAVGIR	277	11	7.00	167	18	18	13	6	1081332000	88620		98056	7.1	b2b3b3b4b4b5b5b6b7b7b9b9b11b11y1y2y3y4y5y6y7y8y9y10y11	226819	956	117327071037588	773270710375882	0.2974	Green	5020	10135751	10135774	226813	90093	90093.00	1.82	2	5072912
NCDO2118_RS07190	ATP-dependent 6-phosphofructokinase 1501063:1502085 reverse MW:35806	Regular	67304990	0	358627035	75	7	23	33.24	302961	272267	211785	0	3	Pass1	PepFrag1	None	7004352	AVELLR	AVELLR	271	6	7.00	171	5	5	2	1	46946390	74997		21209	4.0	b2b3y2y3y6	190563	677	932149161649599	14642983232992	0.1231	Green	2861	7004339	7004355	191196	37289	37289.00	1.00	1	7004339
NCDO2118_RS07190	ATP-dependent 6-phosphofructokinase 1501063:1502085 reverse MW:35806	Regular	67304990	0	358627035	75	7	23	33.24	302961	272267	211785	0	4	Pass1	PepFrag1	Carbamidomethyl C(19)	22691129	NAGDIALNAGIAAGADDICIPEK	NAGDIALNAGIAAGADDICIPEK	171	23	3.50	170	3	3	0	0	14204330	69805	Identified	511	2.4	y3y11y18y23	330782	2051	1951656614265	901104409510003	0.0078	Green	9681	22691237	22691229	294624	2365	2365.00	2.65	3	7570461
NCDO2118_RS07190	ATP-dependent 6-phosphofructokinase 1501063:1502085 reverse MW:35806	Regular	67304990	0	358627035	75	7	23	33.24	302961	272267	211785	0	5	Pass1	PepFrag1	None	29044724	NEELVESPILGTAEEGALFSLTTEGGIK	NEELVESPILGTAEEGALFSLTTEGGIK	288	28	3.58	169	4	4	1	0	7968884	67294	Missing	356	2.2	b4b6y9y10	423230	2710	235002506696719	116668337797813	0.0046	Green	14300	29044842	29044771	408237	1400	1400.00	3.00	3	9688329
NCDO2118_RS07190	ATP-dependent 6-phosphofructokinase 1501063:1502085 reverse MW:35806	Regular	67304990	0	358627035	75	7	23	33.24	302961	272267	211785	0	6	Pass2	VarMod	Oxidation M(7)	10535397	TFVVEVMGR	TFVVEVMGR	162	9	7.00	172	4	4	2	1	20986370	71500		700	1.8	b2y5y6y7	237592	972	118632535023639	78632535023639	0.0080	Green	3718	10535317	10535340	207095	2428	2428.00	2.00	2	5272695
NCDO2118_RS07190	ATP-dependent 6-phosphofructokinase 1501063:1502085 reverse MW:35806	Regular	67304990	0	358627035	75	7	23	33.24	302961	272267	211785	0	7	Pass2	VarMod	Phosphoryl STY(10)	20820379	AGLELYRLNSALNNLNLN	AGLELYRLNSALNNLNLN	322	18	7.00	173	2	2	0	0	1831895	60909		201	2.0	b6y8	350814	1877	183965258881789	826435059211928	0.0056	Green	6644	20820376	20820381	247881	1697	1697.00	3.00	3	6946840
NCDO2118_RS07190	ATP-dependent 6-phosphofructokinase 1501063:1502085 reverse MW:35806	Regular	67304990	0	358627035	75	7	23	33.24	302961	272267	211785	0	8	Pass2	InSource	None	6714199	GVAVGIR	DGIGGVAVGIR	281	7	11.05	167	3	3	0	0	2094519	0.0000		4541	0.0	b5y1y7	226819	645	902539276707172	140507855341434	0.0306	Green	5009	6714177	6714193	226768	9267	9267.00	1.00	1	6714177
NCDO2118_RS07190	ATP-dependent 6-phosphofructokinase 1501063:1502085 reverse MW:35806	Regular	67304990	0	358627035	75	7	23	33.24	302961	272267	211785	0	9	Pass2	InSource	None	5153300	AVGIR	DGIGGVAVGIR	283	5	11.05	167	5	5	1	1	51528030	0.0000		2974	0.0	b2b3y1y3y5	226819	492	75347648430133	110695296860266	0.0299	Green	5004	5153281	5153298	226751	9062	9062.00	1.00	1	5153281
NCDO2118_RS07190	ATP-dependent 6-phosphofructokinase 1501063:1502085 reverse MW:35806	Regular	67304990	0	358627035	75	7	23	33.24	302961	272267	211785	0	10	Pass2	InSource	None	6874036	GIEQLK	YPEFAQVEGQLAGIEQLK	84	6	7.00	168	1	1	0	0	2102295	0.0000		68	0.0	b3y3*	341729	654	910915586100609	142183117220122	0.0057	Green	12124	6874011	6874027	341212	1714	1714.00	1.00	1	6874011
NCDO2118_RS07190	ATP-dependent 6-phosphofructokinase 1501063:1502085 reverse MW:35806	Regular	67304990	0	358627035	75	7	23	33.24	302961	272267	211785	0	11	Pass2	InSource	None	5702882	DGIGGVA	DGIGGVAVGIR	277	7	3.10	167	0	0	0	0	776820	0.0000		0	0.0		226819	531	792786017064859	118557203412972	0.0033	Green	5008	5702885	5702902	226768	1008	1008.00	1.00	1	5702885
NCDO2118_RS07190	ATP-dependent 6-phosphofructokinase 1501063:1502085 reverse MW:35806	Regular	67304990	0	358627035	75	7	23	33.24	302961	272267	211785	0	12	Pass2	InSource	None	4442929	VGIR	DGIGGVAVGIR	284	4	11.05	167	2	2	0	0	880174	0.0000		352	0.0	y1y4	226819	425	683416700833789	966833401667577	0.0030	Green	5001	4442888	4442903	226717	900	900.00	1.00	1	4442888
NCDO2118_RS07190	ATP-dependent 6-phosphofructokinase 1501063:1502085 reverse MW:35806	Regular	67304990	0	358627035	75	7	23	33.24	302961	272267	211785	0	13	Pass2	InSource	None	8985469	GIGGVAVGIR	DGIGGVAVGIR	278	10	11.05	167	0	0	0	0	1106331	0.0000		0	0.0		226819	865	109758215932617	697582159326165	0.0028	Green	5017	8985367	8985393	226810	853	853.00	2.00	2	4497720
NCDO2118_RS07190	ATP-dependent 6-phosphofructokinase 1501063:1502085 reverse MW:35806	Regular	22900470	0	358627035	82	14	23	75.00	306371	267002	109545	1	1	Pass1	PepFrag1	None	20200386	YPEFAQVEGQLAGIEQLK	YPEFAQVEGQLAGIEQLK	72	18	3.96	1823	27	27	24	11	248712800	77555	Identified	83188	10.2	b2b3b4b5b6b7b8b9b10b11b12b13y3y3*y4y4*y5y5*y6y7y7*y7y8y8*y9y9y10y11y12y13y14y15y16*y17y18y18*	380744	1877	183965258881789	143965258881789	0.4976	Green	20421	20200455	20200431	337097	152451	152451.00	2.45	2	10105264
NCDO2118_RS07190	ATP-dependent 6-phosphofructokinase 1501063:1502085 reverse MW:35806	Regular	22900470	0	358627035	82	14	23	75.00	306371	267002	109545	0	2	Pass1	PepFrag1	None	10375448	TFVVEVMGR	TFVVEVMGR	162	9	7.00	1828	8	8	1	2	43003260	69933		8582	6.7	b2b4b5b9b9y1y5y7y8y9	250275	972	118632535023639	78632535023639	0.3078	Green	6963	10375467	10375490	256359	94304	94304.00	1.92	2	5192770
NCDO2118_RS07190	ATP-dependent 6-phosphofructokinase 1501063:1502085 reverse MW:35806	Regular	22900470	0	358627035	82	14	23	75.00	306371	267002	109545	0	3	Pass1	PepFrag1	None	10135738	DGIGGVAVGIR	DGIGGVAVGIR	277	11	7.00	1820	7	7	2	2	105594800	73835		2483	2.9	b3b5b11y4y6y7y8	232786	956	117327071037588	773270710375882	0.0268	Green	3207	10135719	10135742	220218	8204	8204.00	2.00	2	5072896
NCDO2118_RS07190	ATP-dependent 6-phosphofructokinase 1501063:1502085 reverse MW:35806	Regular	22900470	0	358627035	82	14	23	75.00	306371	267002	109545	0	4	Pass1	PepFrag1	None	17138952	IAVLTSGGDAPGMNAAIR	IAVLTSGGDAPGMNAAIR	3	18	7.00	1821	10	10	5	2	47870250	70399	Identified	3187	3.5	b3b4b6b6b7y8y9y11y12y13y14y18y18*	289741	1604	165664406959219	125664406959219	0.0255	Green	5545	17139039	17139036	244934	7803	7803.00	2.00	2	8574556
NCDO2118_RS07190	ATP-dependent 6-phosphofructokinase 1501063:1502085 reverse MW:35806	Regular	22900470	0	358627035	82	14	23	75.00	306371	267002	109545	0	5	Pass1	PepFrag1	None	20209909	FGIEGVVVIGGDGSYHGAMR	FGIEGVVVIGGDGSYHGAMR	91	20	5.22	1827	4	4	0	0	12081650	64420		300	3.1	b2b7y4y8y11y12	308875	1857	182656123619213	817707490794755	0.0164	Green	15491	20209922	20209946	311380	5030	5030.00	3.00	3	6743356
NCDO2118_RS07190	ATP-dependent 6-phosphofructokinase 1501063:1502085 reverse MW:35806	Regular	22900470	0	358627035	82	14	23	75.00	306371	267002	109545	0	6	Pass1	PepFrag1	None	8214516	AGLELYR	AGLELYR	322	7	7.00	1830	2	2	0	0	3723207	59308		2480	1.8	b3y7	182670	761	100774210720246	161548421440491	0.0105	Yellow	11822	8214505	8214522	290402	3226	3226.00	1.00	1	8214505
NCDO2118_RS07190	ATP-dependent 6-phosphofructokinase 1501063:1502085 reverse MW:35806	Regular	22900470	0	358627035	82	14	23	75.00	306371	267002	109545	0	7	Pass1	PepFrag1	None	42181129	LTEHGFPAVGLPGTIDNDIVGTDFTIGFDTAVSTVVDALDK	LTEHGFPAVGLPGTIDNDIVGTDFTIGFDTAVSTVVDALDK	111	41	3.53	1824	8	8	2	0	7363469	62269	Missing	574	3.2	b8b9b12b20b27y8y9y10y15	427195	3930	301084224596082	110542112298041	0.0094	Green	38834	42181548	42181413	511201	2876	2876.00	4.00	4	10552941
NCDO2118_RS07190	ATP-dependent 6-phosphofructokinase 1501063:1502085 reverse MW:35806	Regular	22900470	0	358627035	82	14	23	75.00	306371	267002	109545	0	8	Pass1	PepFrag1	None	7004352	AVELLR	AVELLR	271	6	7.00	1829	2	2	0	0	1941176	56479		352	1.4	b4y3y6	186671	677	932149161649599	14642983232992	0.0060	Yellow	11669	7004352	7004371	289462	1828	1828.00	1.00	1	7004352
NCDO2118_RS07190	ATP-dependent 6-phosphofructokinase 1501063:1502085 reverse MW:35806	Regular	22900470	0	358627035	82	14	23	75.00	306371	267002	109545	0	9	Pass1	PepFrag1	Carbamidomethyl C(19)	22691129	NAGDIALNAGIAAGADDICIPEK	NAGDIALNAGIAAGADDICIPEK	171	23	3.50	1822	5	5	0	0	2112451	56846	Identified	1611	2.0	b3b5*b5b22y3y10y23	369955	2051	1951656614265	1551656614265	0.0042	Yellow	15308	22691307	22691261	310266	1302	1302.00	2.41	2	11350690
NCDO2118_RS07190	ATP-dependent 6-phosphofructokinase 1501063:1502085 reverse MW:35806	Regular	22900470	0	358627035	82	14	23	75.00	306371	267002	109545	0	10	Pass1	PepFrag1	None	34386886	AISEGIEVYGINHGYAGMVAGDIFPLTSASVGDK	AISEGIEVYGINHGYAGMVAGDIFPLTSASVGDK	26	34	4.06	1825	3	3	0	0	3752269	59341	Missing	340	2.0	b7y1y15y16	403687	3183	261607822891141	134405215260761	0.0031	Green	27392	34386918	34386817	375850	951	951.00	3.00	3	11469021
NCDO2118_RS07190	ATP-dependent 6-phosphofructokinase 1501063:1502085 reverse MW:35806	Regular	22900470	0	358627035	82	14	23	75.00	306371	267002	109545	0	11	Pass2	PepFrag2	None	21481335	YPEFAQVEGQLAGIEQLKK	YPEFAQVEGQLAGIEQLKK	72	19	4.56	1826	2	2	0	0	7457178	62324	Identified	4474	5.0	b6b16y5y8*y18*y19	330477	2012	192683688704514	152683688704514	0.0661	Green	16958	21481087	21481052	318775	20247	20247.00	2.26	2	10745580
NCDO2118_RS07190	ATP-dependent 6-phosphofructokinase 1501063:1502085 reverse MW:35806	Regular	22900470	0	358627035	82	14	23	75.00	306371	267002	109545	0	12	Pass2	MissedCleavage	None	23812282	GKNHHIIVLAEGVMTGEEFATK	GKNHHIIVLAEGVMTGEEFATK	211	22	6.04	1831	1	1	0	0	2057658	56732		1063	2.8	b11*y1y16	384755	2234	206608608795017	977390725300111	0.0114	Yellow	27458	23812293	23812297	376091	3481	3481.00	3.00	3	7944146
NCDO2118_RS07190	ATP-dependent 6-phosphofructokinase 1501063:1502085 reverse MW:35806	Regular	22900470	0	358627035	82	14	23	75.00	306371	267002	109545	0	13	Pass2	MissedCleavage	None	35938333	NEELVESPILGTAEEGALFSLTTEGGIKVNNPHK	NEELVESPILGTAEEGALFSLTTEGGIKVNNPHK	288	34	4.25	1832	1	1	0	0	1938557	56473	Missing	550	2.4	b11b34y8	393645	3350	270680002746871	140453335164581	0.0052	Yellow	32167	35938482	35938359	419373	1602	1602.00	3.00	3	11986209
NCDO2118_RS07190	ATP-dependent 6-phosphofructokinase 1501063:1502085 reverse MW:35806	Regular	22900470	0	358627035	82	14	23	75.00	306371	267002	109545	0	14	Pass2	MissedCleavage	None	20020716	AGLELYRLNSALNNLNLN	AGLELYRLNSALNNLNLN	322	18	7.00	1833	1	1	0	0	1150719	54208		124	1.6	b10*y3*y7	382628	1877	183965258881789	826435059211928	0.0028	Yellow	30006	20020904	20020929	392340	868	868.00	2.67	3	6680350
NCDO2118_RS07190	ATP-dependent 6-phosphofructokinase 1501063:1502085 reverse MW:35806	Regular	22900470	0	358627035	82	14	23	75.00	306371	267002	109545	0	15	Pass2	InSource	None	7584407	AGIEQLK	YPEFAQVEGQLAGIEQLK	83	7	7.00	1823	1	1	0	0	847517	0.0000		237	0.0	b5b5b7*y4y5	380744	721	97211238753916	154422477507832	0.0072	Green	20462	7584326	7584344	337271	2198	2198.00	1.00	1	7584326
NCDO2118_RS07190	ATP-dependent 6-phosphofructokinase 1501063:1502085 reverse MW:35806	Regular	4991333	0	358627035	23	4	23	20.59	18769	16749	7178	1	1	Pass1	PepFrag1	None	20200386	YPEFAQVEGQLAGIEQLK	YPEFAQVEGQLAGIEQLK	72	18	3.96	390	9	9	5	2	56083000	64470	Missing	3395	3.6	b6b7y6y7y8y11y12y13y18	332948	1877	183965258881789	826435059211928	0.4606	Green	6299	20200382	20200374	343416	8645	8645.00	2.55	3	6740176
NCDO2118_RS07190	ATP-dependent 6-phosphofructokinase 1501063:1502085 reverse MW:35806	Regular	4991333	0	358627035	23	4	23	20.59	18769	16749	7178	0	2	Pass1	PepFrag1	None	10135738	DGIGGVAVGIR	DGIGGVAVGIR	277	11	7.00	389	3	3	1	0	12929440	58098		838	1.9	y5y7y8	192391	956	117327071037588	773270710375882	0.1343	Yellow	4768	10135752	10135768	229252	2521	2521.00	2.00	2	5072912
NCDO2118_RS07190	ATP-dependent 6-phosphofructokinase 1501063:1502085 reverse MW:35806	Regular	4991333	0	358627035	23	4	23	20.59	18769	16749	7178	0	3	Pass2	PepFrag2	None	42181129	LTEHGFPAVGLPGTIDNDIVGTDFTIGFDTAVSTVVDALDK	LTEHGFPAVGLPGTIDNDIVGTDFTIGFDTAVSTVVDALDK	111	41	3.53	391	11	11	6	0	13300860	58221	Identified	2903	4.4	b9b10b11b19b26y7y8y9y10y11y41	445917	3930	301084224596082	110542112298041	0.3499	Yellow	8828	42181676	42181676	510077	6567	6567.00	3.64	4	10552974
NCDO2118_RS07190	ATP-dependent 6-phosphofructokinase 1501063:1502085 reverse MW:35806	Regular	4991333	0	358627035	23	4	23	20.59	18769	16749	7178	0	4	Pass2	MissedCleavage	None	24372908	NHHIIVLAEGVMTGEEFATKLK	NHHIIVLAEGVMTGEEFATKLK	213	22	6.04	392	0	0	0	0	1635402	49118		42	1.8	y11	407116	2310	211268275550397	100845517033598	0.0552	Red	6439	24372662	24372624	352517	1036	1036.00	3.00	3	8130936
NCDO2118_RS07190	ATP-dependent 6-phosphofructokinase 1501063:1502085 reverse MW:35806	Regular	23283670	0	358627035	57	10	23	38.82	291339	237437	186866	1	1	Pass1	PepFrag1	None	10135738	DGIGGVAVGIR	DGIGGVAVGIR	277	11	7.00	519	17	17	12	5	556039900	81122		157024	8.5	b2b3b4b4b5b5b6b7b8b8b10b11b11y1y2y3y4y5y6y7y8y9y10y11	215668	956	117327071037588	773270710375882	0.5200	Green	7890	10135761	10135789	226998	151493	151493.00	1.68	2	5072917
NCDO2118_RS07190	ATP-dependent 6-phosphofructokinase 1501063:1502085 reverse MW:35806	Regular	23283670	0	358627035	57	10	23	38.82	291339	237437	186866	0	2	Pass1	PepFrag1	None	11996379	LNSALNNLNLN	LNSALNNLNLN	329	11	6.13	525	3	3	0	0	3385734	58967		3859	6.6	b2b2*b3*b11y9y11	256843	1116	130077574610854	90077574610854	0.2599	Green	9374	11996424	11996446	247863	75729	75729.00	1.98	2	6003249
NCDO2118_RS07190	ATP-dependent 6-phosphofructokinase 1501063:1502085 reverse MW:35806	Regular	23283670	0	358627035	57	10	23	38.82	291339	237437	186866	0	3	Pass1	PepFrag1	None	7004352	AVELLR	AVELLR	271	6	7.00	524	4	4	1	0	25383570	67716		6206	2.6	b3b4y1y6	192806	677	932149161649599	14642983232992	0.0351	Green	4791	7004345	7004356	192499	10215	10215.00	1.00	1	7004345
NCDO2118_RS07190	ATP-dependent 6-phosphofructokinase 1501063:1502085 reverse MW:35806	Regular	23283670	0	358627035	57	10	23	38.82	291339	237437	186866	0	4	Pass1	PepFrag1	Carbamidomethyl C(19)	22691129	NAGDIALNAGIAAGADDICIPEK	NAGDIALNAGIAAGADDICIPEK	171	23	3.50	520	7	7	4	0	27424270	68052	Identified	996	3.4	b13*b18b19b21*y3y9y10y11y12	311649	2051	1951656614265	901104409510003	0.0203	Green	12199	22691071	22691057	295007	5913	5913.00	2.54	3	7570405
NCDO2118_RS07190	ATP-dependent 6-phosphofructokinase 1501063:1502085 reverse MW:35806	Regular	23283670	0	358627035	57	10	23	38.82	291339	237437	186866	0	5	Pass1	PepFrag1	None	42181129	LTEHGFPAVGLPGTIDNDIVGTDFTIGFDTAVSTVVDALDK	LTEHGFPAVGLPGTIDNDIVGTDFTIGFDTAVSTVVDALDK	111	41	3.53	522	6	6	1	0	21826290	67060	Identified	2047	4.0	b9b11b20y9y10y41	392683	3930	301084224596082	110542112298041	0.0181	Green	15635	42181232	42181232	509869	5274	5274.00	3.69	4	10552863
NCDO2118_RS07190	ATP-dependent 6-phosphofructokinase 1501063:1502085 reverse MW:35806	Regular	23283670	0	358627035	57	10	23	38.82	291339	237437	186866	0	6	Pass1	PepFrag1	None	11906164	FENVVNNINK	FENVVNNINK	197	10	7.00	523	0	0	0	0	844669	52937		146	1.8	b9*b10	186898	1097	128596965077436	885969650774356	0.0084	Yellow	5288	11906038	11906060	198501	2459	2459.00	2.00	2	5958055
NCDO2118_RS07190	ATP-dependent 6-phosphofructokinase 1501063:1502085 reverse MW:35806	Regular	23283670	0	358627035	57	10	23	38.82	291339	237437	186866	0	7	Pass1	PepFrag1	None	17138952	IAVLTSGGDAPGMNAAIR	IAVLTSGGDAPGMNAAIR	3	18	7.00	521	1	1	0	0	1653340	55854	Missing	771	1.9	y9*y13*y15*y18	269618	1604	165664406959219	125664406959219	0.0050	Yellow	12319	17139045	17139031	297996	1451	1451.00	2.00	2	8574559
NCDO2118_RS07190	ATP-dependent 6-phosphofructokinase 1501063:1502085 reverse MW:35806	Regular	23283670	0	358627035	57	10	23	38.82	291339	237437	186866	0	8	Pass2	PepFrag2	None	9714945	GGTFLYSAR	GGTFLYSAR	63	9	9.84	528	2	2	0	0	5179976	60814		268	1.4	y4y9	207823	877	110770988111791	181541976223582	0.0045	Green	7738	9714642	9714650	225886	1318	1318.00	1.21	1	9714642
NCDO2118_RS07190	ATP-dependent 6-phosphofructokinase 1501063:1502085 reverse MW:35806	Regular	23283670	0	358627035	57	10	23	38.82	291339	237437	186866	0	9	Pass2	VarMod	Phosphoryl STY(*)	13776674	IGRGGTFLYSAR	IGRGGTFLYSAR	60	12	11.14	527	2	2	0	0	3279755	58829		1562	2.3	b7b10	219469	1197	136297869643399	962978696433986	0.0128	Green	8441	13776700	13776712	233570	3736	3736.00	2.00	2	6893386
NCDO2118_RS07190	ATP-dependent 6-phosphofructokinase 1501063:1502085 reverse MW:35806	Regular	23283670	0	358627035	57	10	23	38.82	291339	237437	186866	0	10	Pass2	VarMod	Oxidation M(*);Phosphoryl STY(*)	18098564	IAVLTSGGDAPGMNAAIR	IAVLTSGGDAPGMNAAIR	3	18	7.00	526	3	3	0	0	14561870	65303	Identified	1911	2.5	b10-H3PO4b11b13y8y16y18	269618	1604	165664406959219	704429379728127	0.0115	Green	7850	18098552	18098565	226621	3342	3342.00	2.54	3	6039566
NCDO2118_RS07190	ATP-dependent 6-phosphofructokinase 1501063:1502085 reverse MW:35806	Regular	23283670	0	358627035	57	10	23	38.82	291339	237437	186866	0	11	Pass2	InSource	None	6714199	GVAVGIR	DGIGGVAVGIR	281	7	11.05	519	7	7	3	0	33584670	0.0000		7833	0.0	b2b3b5b6b7y3y7	215668	645	902539276707172	140507855341434	0.0560	Green	7876	6714194	6714206	226883	16329	16329.00	1.00	1	6714194
NCDO2118_RS07190	ATP-dependent 6-phosphofructokinase 1501063:1502085 reverse MW:35806	Regular	23283670	0	358627035	57	10	23	38.82	291339	237437	186866	0	12	Pass2	InSource	None	5153300	AVGIR	DGIGGVAVGIR	283	5	11.05	519	5	5	1	0	10770340	0.0000		4243	0.0	b2b3b5y1y5	215668	492	75347648430133	110695296860266	0.0483	Green	7872	5153272	5153283	226872	14080	14080.00	1.00	1	5153272
NCDO2118_RS07190	ATP-dependent 6-phosphofructokinase 1501063:1502085 reverse MW:35806	Regular	45285260	0	358627035	52	10	23	37.94	320444	272797	183151	1	1	Pass1	PepFrag1	None	20200386	YPEFAQVEGQLAGIEQLK	YPEFAQVEGQLAGIEQLK	72	18	3.96	362	29	29	25	10	817752000	85686	Identified	152302	11.7	b2b3b3b4b5b6b7b7*b7b8b8b9b9b10b10*b10b11b11*b12b13*b17b18y1y2y3y3*y4y4y5y6y6*y6y7y7y8y8y9y9y10y11y11*y12y13y14y15y17y18	343619	1877	183965258881789	143965258881789	0.6928	Green	13888	20200446	20200401	341062	222004	222004.00	2.37	2	10105260
NCDO2118_RS07190	ATP-dependent 6-phosphofructokinase 1501063:1502085 reverse MW:35806	Regular	45285260	0	358627035	52	10	23	37.94	320444	272797	183151	0	2	Pass1	PepFrag1	None	7004352	AVELLR	AVELLR	271	6	7.00	364	8	8	5	3	99213680	76525		28409	4.0	b2b3b4b5y1y2y3y6	191292	677	932149161649599	14642983232992	0.1536	Green	3136	7004353	7004367	191328	49215	49215.00	1.00	1	7004353
NCDO2118_RS07190	ATP-dependent 6-phosphofructokinase 1501063:1502085 reverse MW:35806	Regular	45285260	0	358627035	52	10	23	37.94	320444	272797	183151	0	3	Pass1	PepFrag1	None	11906164	FENVVNNINK	FENVVNNINK	197	10	7.00	361	0	0	0	0	1308666	57728		129	1.6	b8*y7*	194958	1097	128596965077436	885969650774356	0.0049	Green	4007	11906221	11906247	205003	1578	1578.00	2.34	2	5958147
NCDO2118_RS07190	ATP-dependent 6-phosphofructokinase 1501063:1502085 reverse MW:35806	Regular	45285260	0	358627035	52	10	23	37.94	320444	272797	183151	0	4	Pass1	PepFrag1	None	29044724	NEELVESPILGTAEEGALFSLTTEGGIK	NEELVESPILGTAEEGALFSLTTEGGIK	288	28	3.58	363	1	1	0	0	1958067	59478	Missing	158	1.9	y10y10y11	423941	2710	235002506696719	116668337797813	0.0030	Green	16335	29044668	29044597	408074	965	965.00	3.00	3	9688271
NCDO2118_RS07190	ATP-dependent 6-phosphofructokinase 1501063:1502085 reverse MW:35806	Regular	45285260	0	358627035	52	10	23	37.94	320444	272797	183151	0	5	Pass2	PepFrag2	None	11996379	LNSALNNLNLN	LNSALNNLNLN	329	11	6.13	365	2	2	0	0	461341	53200		80	4.7	y5y11	265355	1116	130077574610854	90077574610854	0.0920	Yellow	3700	11996248	11996273	200014	29486	29486.00	2.00	2	6003160
NCDO2118_RS07190	ATP-dependent 6-phosphofructokinase 1501063:1502085 reverse MW:35806	Regular	45285260	0	358627035	52	10	23	37.94	320444	272797	183151	0	6	Pass2	PepFrag2	None	9714945	GGTFLYSAR	GGTFLYSAR	63	9	9.84	370	1	1	0	0	1020065	56646		223	1.4	y5y9	194559	877	110770988111791	707709881117911	0.0042	Yellow	5398	9715221	9715253	224104	1344	1344.00	1.56	2	4862647
NCDO2118_RS07190	ATP-dependent 6-phosphofructokinase 1501063:1502085 reverse MW:35806	Regular	45285260	0	358627035	52	10	23	37.94	320444	272797	183151	0	7	Pass2	VarMod	Phosphoryl STY(19)	25172571	NHHIIVLAEGVMTGEEFATKLK	NHHIIVLAEGVMTGEEFATKLK	213	22	6.04	367	2	2	0	0	1302382	57707		235	3.6	y7y9y16	361347	2310	211268275550397	100845517033598	0.0217	Green	15562	25172502	25172479	381298	6952	6952.00	2.76	3	8397549
NCDO2118_RS07190	ATP-dependent 6-phosphofructokinase 1501063:1502085 reverse MW:35806	Regular	45285260	0	358627035	52	10	23	37.94	320444	272797	183151	0	8	Pass2	VarMod	Oxidation M(7)	10535397	TFVVEVMGR	TFVVEVMGR	162	9	7.00	366	4	4	1	1	9127642	66163		406	1.7	b2b3b8y6	244220	972	118632535023639	78632535023639	0.0067	Green	4122	10535341	10535371	207010	2155	2155.00	2.00	2	5272707
NCDO2118_RS07190	ATP-dependent 6-phosphofructokinase 1501063:1502085 reverse MW:35806	Regular	45285260	0	358627035	52	10	23	37.94	320444	272797	183151	0	9	Pass2	VarMod	Phosphoryl STY(2)	17148748	VSVLGHIQRGGSPTAR	VSVLGHIQRGGSPTAR	244	16	12.40	369	1	1	0	0	2592683	60697	Missing	124	1.8	b8y9*y12*	164935	1526	160249244219217	120249244219217	0.0047	Green	7907	17148765	17148754	254507	1513	1513.00	2.00	2	8579419
NCDO2118_RS07190	ATP-dependent 6-phosphofructokinase 1501063:1502085 reverse MW:35806	Regular	45285260	0	358627035	52	10	23	37.94	320444	272797	183151	0	10	Pass2	VarMod	Phosphoryl STY(*)	17148748	VSVLGHIQRGGSPTAR	VSVLGHIQRGGSPTAR	244	16	12.40	368	1	1	0	0	677119	54866	Missing	114	1.6	y8y5-H3PO4	164935	1526	160249244219217	120249244219217	0.0035	Yellow	7586	17148642	17148631	249477	1108	1108.00	2.00	2	8579357
NCDO2118_RS07190	ATP-dependent 6-phosphofructokinase 1501063:1502085 reverse MW:35806	Regular	45285260	0	358627035	52	10	23	37.94	320444	272797	183151	0	11	Pass2	InSource	None	6874036	GIEQLK	YPEFAQVEGQLAGIEQLK	84	6	7.00	362	2	2	0	0	26244350	0.0000		566	0.0	y4y6	343619	654	910915586100609	142183117220122	0.0103	Green	13887	6874014	6874029	341060	3285	3285.00	1.00	1	6874014
NCDO2118_RS07190	ATP-dependent 6-phosphofructokinase 1501063:1502085 reverse MW:35806	Regular	45285260	0	358627035	52	10	23	37.94	320444	272797	183151	0	12	Pass2	InSource	None	8715247	LAGIEQLK	YPEFAQVEGQLAGIEQLK	82	8	7.00	362	1	1	0	0	1584548	0.0000		405	0.0	y8	343619	845	108059786919021	176119573838043	0.0026	Green	13906	8715243	8715255	341203	839	839.00	1.00	1	8715243
NCDO2118_RS07190	ATP-dependent 6-phosphofructokinase 1501063:1502085 reverse MW:35806	Regular	19430270	0	358627035	75	11	23	48.24	305669	277213	124169	1	1	Pass1	PepFrag1	None	20200386	YPEFAQVEGQLAGIEQLK	YPEFAQVEGQLAGIEQLK	72	18	3.96	2143	25	25	19	7	256012700	76967	Identified	108107	11.4	b3b4b5b6b6*b7b8b9b10b11b11b12*b17b18b18y1y2y3y4y4*y5y6y7y7y8y10y11y12y12y13y14y17y18	369152	1877	183965258881789	143965258881789	0.6737	Green	21781	20200442	20200422	336119	205928	205928.00	2.43	2	10105258
NCDO2118_RS07190	ATP-dependent 6-phosphofructokinase 1501063:1502085 reverse MW:35806	Regular	19430270	0	358627035	75	11	23	48.24	305669	277213	124169	0	2	Pass1	PepFrag1	None	10375448	TFVVEVMGR	TFVVEVMGR	162	9	7.00	2146	6	6	1	1	34881840	68311		3421	5.5	b1b5b6b9y2y3y9	249998	972	118632535023639	78632535023639	0.1846	Green	7798	10375387	10375412	251607	56421	56421.00	1.94	2	5192730
NCDO2118_RS07190	ATP-dependent 6-phosphofructokinase 1501063:1502085 reverse MW:35806	Regular	19430270	0	358627035	75	11	23	48.24	305669	277213	124169	0	3	Pass1	PepFrag1	None	10135738	DGIGGVAVGIR	DGIGGVAVGIR	277	11	7.00	2140	7	7	3	0	88605720	72359		5815	3.7	b2b6y3y4y5y7y8y11	224710	956	117327071037588	773270710375882	0.0486	Green	3612	10135705	10135731	211876	14864	14864.00	1.94	2	5072889
NCDO2118_RS07190	ATP-dependent 6-phosphofructokinase 1501063:1502085 reverse MW:35806	Regular	19430270	0	358627035	75	11	23	48.24	305669	277213	124169	0	4	Pass1	PepFrag1	None	42181129	LTEHGFPAVGLPGTIDNDIVGTDFTIGFDTAVSTVVDALDK	LTEHGFPAVGLPGTIDNDIVGTDFTIGFDTAVSTVVDALDK	111	41	3.53	2144	6	6	0	0	6323895	60895	Identified	761	4.2	b6b9b12b20*b26y7y9y13	422469	3930	301084224596082	110542112298041	0.0190	Green	40418	42181346	42181270	510810	5817	5817.00	3.59	4	10552891
NCDO2118_RS07190	ATP-dependent 6-phosphofructokinase 1501063:1502085 reverse MW:35806	Regular	19430270	0	358627035	75	11	23	48.24	305669	277213	124169	0	5	Pass1	PepFrag1	None	20209909	FGIEGVVVIGGDGSYHGAMR	FGIEGVVVIGGDGSYHGAMR	91	20	5.22	2145	5	5	0	0	6861885	61249		900	2.8	b6b14y8y12y16	307293	1857	182656123619213	817707490794755	0.0124	Green	17308	20209985	20209993	312821	3789	3789.00	3.00	3	6743377
NCDO2118_RS07190	ATP-dependent 6-phosphofructokinase 1501063:1502085 reverse MW:35806	Regular	19430270	0	358627035	75	11	23	48.24	305669	277213	124169	0	6	Pass1	PepFrag1	None	17138952	IAVLTSGGDAPGMNAAIR	IAVLTSGGDAPGMNAAIR	3	18	7.00	2141	5	5	1	0	16005210	64927	Identified	608	2.4	b3y5*y8y11y12y14	282395	1604	165664406959219	125664406959219	0.0093	Green	6384	17138932	17138934	237942	2852	2852.00	2.00	2	8574503
NCDO2118_RS07190	ATP-dependent 6-phosphofructokinase 1501063:1502085 reverse MW:35806	Regular	19430270	0	358627035	75	11	23	48.24	305669	277213	124169	0	7	Pass1	PepFrag1	None	11996379	LNSALNNLNLN	LNSALNNLNLN	329	11	6.13	2142	1	1	0	0	2259263	56424		154	1.7	b6	281095	1116	130077574610854	90077574610854	0.0060	Yellow	7990	11996413	11996435	254086	1836	1836.00	2.00	2	6003243
NCDO2118_RS07190	ATP-dependent 6-phosphofructokinase 1501063:1502085 reverse MW:35806	Regular	19430270	0	358627035	75	11	23	48.24	305669	277213	124169	0	8	Pass2	MissedCleavage	None	16678388	FENVVNNINKGYEK	FENVVNNINKGYEK	197	14	14.00	2147	5	5	0	1	13138620	64070		1101	1.4	b5b6b10y4y6y7*y10y10y14	163624	1530	160529155651715	670194371011432	0.0028	Green	2300	16678443	16678466	191840	866	866.00	2.63	3	5566196
NCDO2118_RS07190	ATP-dependent 6-phosphofructokinase 1501063:1502085 reverse MW:35806	Regular	19430270	0	358627035	75	11	23	48.24	305669	277213	124169	0	9	Pass2	VarMod	Oxidation M(13)	17298901	IAVLTSGGDAPGMNAAIR	IAVLTSGGDAPGMNAAIR	3	18	7.00	2148	5	5	0	0	7922070	61873	Identified	720	2.6	b4b10y5y8*y15y16y18y18*	282395	1604	165664406959219	125664406959219	0.0117	Green	3069	17298853	17298854	205257	3572	3572.00	2.08	2	8654463
NCDO2118_RS07190	ATP-dependent 6-phosphofructokinase 1501063:1502085 reverse MW:35806	Regular	19430270	0	358627035	75	11	23	48.24	305669	277213	124169	0	10	Pass2	VarMod	Phosphoryl STY(10)	20820379	AGLELYRLNSALNNLNLN	AGLELYRLNSALNNLNLN	322	18	7.00	2150	2	2	0	0	1161040	53533		132	2.6	b7b10b10*	381733	1877	183965258881789	826435059211928	0.0113	Red	6022	20820296	20820301	234361	3464	3464.00	3.00	3	6946814
NCDO2118_RS07190	ATP-dependent 6-phosphofructokinase 1501063:1502085 reverse MW:35806	Regular	19430270	0	358627035	75	11	23	48.24	305669	277213	124169	0	11	Pass2	VarMod	Oxidation M(14);Phosphoryl STY(15)	24771894	GKNHHIIVLAEGVMTGEEFATK	GKNHHIIVLAEGVMTGEEFATK	211	22	6.04	2149	2	2	0	0	4876059	59765		672	1.8	b8*b11b13b15b20-H3PO4y6y10y11-H3PO4y21-H3PO4	390391	2234	206608608795017	166608608795017	0.0035	Green	40072	24771956	24771890	506975	1082	1082.00	2.54	2	12391014
NCDO2118_RS07190	ATP-dependent 6-phosphofructokinase 1501063:1502085 reverse MW:35806	Regular	19430270	0	358627035	75	11	23	48.24	305669	277213	124169	0	12	Pass2	InSource	None	7584407	AGIEQLK	YPEFAQVEGQLAGIEQLK	83	7	7.00	2143	4	4	2	0	4882584	0.0000		1296	0.0	b4b5b6y7	369152	721	97211238753916	154422477507832	0.0094	Green	21777	7584363	7584382	336100	2867	2867.00	1.00	1	7584363
NCDO2118_RS07190	ATP-dependent 6-phosphofructokinase 1501063:1502085 reverse MW:35806	Regular	19430270	0	358627035	75	11	23	48.24	305669	277213	124169	0	13	Pass2	InSource	None	6874036	GIEQLK	YPEFAQVEGQLAGIEQLK	84	6	7.00	2143	2	2	0	0	708514	0.0000		482	0.0	b2y3*y6	369152	654	910915586100609	142183117220122	0.0076	Green	21786	6874052	6874070	336151	2311	2311.00	1.00	1	6874052
NCDO2118_RS07190	ATP-dependent 6-phosphofructokinase 1501063:1502085 reverse MW:35806	Regular	7786506	0	358627035	25	5	23	20.59	28706	25937	7357	1	1	Pass1	PepFrag1	None	20200386	YPEFAQVEGQLAGIEQLK	YPEFAQVEGQLAGIEQLK	72	18	3.96	462	7	7	3	1	32154020	63986	Missing	1299	3.9	b6b7b10b11y4y6y7y10*	331959	1877	183965258881789	826435059211928	0.3729	Yellow	7203	20200432	20200404	342277	10705	10705.00	2.57	3	6740193
NCDO2118_RS07190	ATP-dependent 6-phosphofructokinase 1501063:1502085 reverse MW:35806	Regular	7786506	0	358627035	25	5	23	20.59	28706	25937	7357	0	2	Pass1	PepFrag1	None	42181129	LTEHGFPAVGLPGTIDNDIVGTDFTIGFDTAVSTVVDALDK	LTEHGFPAVGLPGTIDNDIVGTDFTIGFDTAVSTVVDALDK	111	41	3.53	463	11	11	4	1	42320960	65179	Identified	3422	4.8	b11b20b27y5y6y8y9y10y11y14y41	443704	3930	301084224596082	110542112298041	0.2956	Yellow	9669	42181184	42181184	510340	8485	8485.00	3.67	4	10552851
NCDO2118_RS07190	ATP-dependent 6-phosphofructokinase 1501063:1502085 reverse MW:35806	Regular	7786506	0	358627035	25	5	23	20.59	28706	25937	7357	0	3	Pass1	PepFrag1	None	10135738	DGIGGVAVGIR	DGIGGVAVGIR	277	11	7.00	461	5	5	3	0	25412650	62964		1933	2.7	y3y4y6y7y8	205769	956	117327071037588	773270710375882	0.2350	Yellow	5385	10135696	10135711	228314	6747	6747.00	2.00	2	5072884
NCDO2118_RS07190	ATP-dependent 6-phosphofructokinase 1501063:1502085 reverse MW:35806	Regular	7786506	0	358627035	25	5	23	20.59	28706	25937	7357	0	4	Pass2	PepFrag2	None	11996379	LNSALNNLNLN	LNSALNNLNLN	329	11	6.13	465	0	0	0	0	4903736	55819		34	1.2	y7*	303314	1116	130077574610854	90077574610854	0.0273	Red	5723	11996622	11996632	249112	783	783.00	2.00	2	6003347
NCDO2118_RS07190	ATP-dependent 6-phosphofructokinase 1501063:1502085 reverse MW:35806	Regular	7786506	0	358627035	25	5	23	20.59	28706	25937	7357	0	5	Pass2	VarMod	Phosphoryl STY(19)	25172571	NHHIIVLAEGVMTGEEFATKLK	NHHIIVLAEGVMTGEEFATKLK	213	22	6.04	464	1	1	0	0	1328301	50146		62	1.8	b7y8	385491	2310	211268275550397	100845517033598	0.0356	Red	7249	25172568	25172515	345247	1023	1023.00	3.00	3	8397571
NCDO2118_RS07190	ATP-dependent 6-phosphofructokinase 1501063:1502085 reverse MW:35806	Regular	7786506	0	358627035	25	5	23	20.59	28706	25937	7357	0	6	Pass2	InSource	None	7284414	GGVAVGIR	DGIGGVAVGIR	280	8	11.05	461	1	1	0	0	2980363	0.0000		607	0.0	y8	205769	693	946778652848494	149355730569699	0.0335	Yellow	5386	7284390	7284402	228340	963	963.00	1.00	1	7284390
NCDO2118_RS07190	ATP-dependent 6-phosphofructokinase 1501063:1502085 reverse MW:35806	Regular	60740330	0	358627035	106	11	23	56.76	593978	532853	433359	1	1	Pass1	PepFrag1	None	20200386	YPEFAQVEGQLAGIEQLK	YPEFAQVEGQLAGIEQLK	72	18	3.96	338	33	33	30	15	1010964000	87882	Identified	309764	13.9	b2b3b4b5b6b6*b7b7*b7b8b8*b8b9b10b10b11b11*b11b12b13b13*b13b14b15b15*b17y1y2y3y3*y4y4y5y6y6y7y7*y8y8y9y9*y9y10y10*y11y11*y11y12y12*y13y14y15y16y16y17y18y18*	348814	1877	183965258881789	143965258881789	0.5998	Green	20613	20200383	20200347	340278	356277	356277.00	2.31	2	10105228
NCDO2118_RS07190	ATP-dependent 6-phosphofructokinase 1501063:1502085 reverse MW:35806	Regular	60740330	0	358627035	106	11	23	56.76	593978	532853	433359	0	2	Pass1	PepFrag1	None	7004352	AVELLR	AVELLR	271	6	7.00	341	8	8	5	3	101465800	77898		99663	4.0	b2b3b4b4b5y1y2y3y6	180301	677	932149161649599	14642983232992	0.2543	Green	4055	7004337	7004349	190376	151070	151070.00	1.00	1	7004337
NCDO2118_RS07190	ATP-dependent 6-phosphofructokinase 1501063:1502085 reverse MW:35806	Regular	60740330	0	358627035	106	11	23	56.76	593978	532853	433359	0	3	Pass1	PepFrag1	None	10135738	DGIGGVAVGIR	DGIGGVAVGIR	277	11	7.00	336	8	8	4	1	104459200	78024		9529	4.4	b2b3b5y3y5y6y7y8y11	218606	956	117327071037588	773270710375882	0.0429	Green	8315	10135680	10135696	230776	25506	25506.00	1.93	2	5072876
NCDO2118_RS07190	ATP-dependent 6-phosphofructokinase 1501063:1502085 reverse MW:35806	Regular	60740330	0	358627035	106	11	23	56.76	593978	532853	433359	0	4	Pass1	PepFrag1	Carbamidomethyl C(19)	22691129	NAGDIALNAGIAAGADDICIPEK	NAGDIALNAGIAAGADDICIPEK	171	23	3.50	337	8	8	0	1	8812417	67286	Identified	1424	2.8	b6*b8b10b10*b12b20b23*y2y3y5y8y17*y23	333960	2051	1951656614265	901104409510003	0.0056	Green	15944	22691179	22691181	294298	3325	3325.00	2.51	3	7570442
NCDO2118_RS07190	ATP-dependent 6-phosphofructokinase 1501063:1502085 reverse MW:35806	Regular	60740330	0	358627035	106	11	23	56.76	593978	532853	433359	0	5	Pass1	PepFrag1	None	29044724	NEELVESPILGTAEEGALFSLTTEGGIK	NEELVESPILGTAEEGALFSLTTEGGIK	288	28	3.58	339	2	2	0	0	5216744	65009	Missing	663	2.8	b11y15y28	415347	2710	235002506696719	116668337797813	0.0049	Green	24566	29044877	29044807	408233	2887	2887.00	2.82	3	9688341
NCDO2118_RS07190	ATP-dependent 6-phosphofructokinase 1501063:1502085 reverse MW:35806	Regular	60740330	0	358627035	106	11	23	56.76	593978	532853	433359	0	6	Pass1	PepFrag1	None	11906164	FENVVNNINK	FENVVNNINK	197	10	7.00	335	5	5	3	2	17117040	70169		586	1.9	b2b3b4y6*y7y8	188412	1097	128596965077436	885969650774356	0.0048	Green	3489	11906153	11906165	183976	2862	2862.00	2.00	2	5958113
NCDO2118_RS07190	ATP-dependent 6-phosphofructokinase 1501063:1502085 reverse MW:35806	Regular	60740330	0	358627035	106	11	23	56.76	593978	532853	433359	0	7	Pass1	PepFrag1	None	42181129	LTEHGFPAVGLPGTIDNDIVGTDFTIGFDTAVSTVVDALDK	LTEHGFPAVGLPGTIDNDIVGTDFTIGFDTAVSTVVDALDK	111	41	3.53	340	5	5	0	0	3512738	63291	Missing	715	3.1	b10y6y8y10y41	401460	3930	301084224596082	110542112298041	0.0043	Green	26340	42180893	42180893	510282	2526	2526.00	3.73	4	10552778
NCDO2118_RS07190	ATP-dependent 6-phosphofructokinase 1501063:1502085 reverse MW:35806	Regular	60740330	0	358627035	106	11	23	56.76	593978	532853	433359	0	8	Pass2	PepFrag2	None	9714945	GGTFLYSAR	GGTFLYSAR	63	9	9.84	345	4	4	0	0	3617980	63419		1373	2.7	b9y5y7y9	199465	877	110770988111791	181541976223582	0.0140	Green	7100	9715223	9715230	220284	8311	8311.00	1.53	1	9715223
NCDO2118_RS07190	ATP-dependent 6-phosphofructokinase 1501063:1502085 reverse MW:35806	Regular	60740330	0	358627035	106	11	23	56.76	593978	532853	433359	0	9	Pass2	VarMod	Oxidation M(7)	10535397	TFVVEVMGR	TFVVEVMGR	162	9	7.00	344	6	6	3	1	20231910	70895		1757	3.0	b2b3b4y3y4y5y6y6	231354	972	118632535023639	78632535023639	0.0186	Green	5572	10535390	10535405	206361	11026	11026.00	2.00	2	5272731
NCDO2118_RS07190	ATP-dependent 6-phosphofructokinase 1501063:1502085 reverse MW:35806	Regular	60740330	0	358627035	106	11	23	56.76	593978	532853	433359	0	10	Pass2	VarMod	Oxidation M(13)	17298901	IAVLTSGGDAPGMNAAIR	IAVLTSGGDAPGMNAAIR	3	18	7.00	342	11	11	3	1	8600535	67180	Identified	3152	3.6	b2b4b10b13b18y2y6y8*y11y12y13y13*y14y18	255669	1604	165664406959219	125664406959219	0.0144	Green	6401	17298952	17298937	213844	8569	8569.00	2.07	2	8654512
NCDO2118_RS07190	ATP-dependent 6-phosphofructokinase 1501063:1502085 reverse MW:35806	Regular	60740330	0	358627035	106	11	23	56.76	593978	532853	433359	0	11	Pass2	VarMod	Oxidation M(19)	20369858	FGIEGVVVIGGDGSYHGAMR	FGIEGVVVIGGDGSYHGAMR	91	20	5.22	343	1	1	0	0	1513583	59635		65	1.5	b7y13	289720	1857	182656123619213	142656123619213	0.0013	Green	14985	20369963	20369925	285452	768	768.00	2.00	2	10190018
NCDO2118_RS07190	ATP-dependent 6-phosphofructokinase 1501063:1502085 reverse MW:35806	Regular	60740330	0	358627035	106	11	23	56.76	593978	532853	433359	0	12	Pass2	InSource	None	7584407	AGIEQLK	YPEFAQVEGQLAGIEQLK	83	7	7.00	338	5	5	2	1	32498650	0.0000		2178	0.0	b4b4b5y3y4y7	348814	721	97211238753916	154422477507832	0.0124	Green	20628	7584405	7584416	340339	7346	7346.00	1.00	1	7584405
NCDO2118_RS07190	ATP-dependent 6-phosphofructokinase 1501063:1502085 reverse MW:35806	Regular	60740330	0	358627035	106	11	23	56.76	593978	532853	433359	0	13	Pass2	InSource	None	6874036	GIEQLK	YPEFAQVEGQLAGIEQLK	84	6	7.00	338	4	4	0	1	35129430	0.0000		1016	0.0	b2b4y4y4y6	348814	654	910915586100609	142183117220122	0.0111	Green	20615	6874029	6874041	340282	6569	6569.00	1.00	1	6874029
NCDO2118_RS07190	ATP-dependent 6-phosphofructokinase 1501063:1502085 reverse MW:35806	Regular	60740330	0	358627035	106	11	23	56.76	593978	532853	433359	0	14	Pass2	InSource	None	4012871	LLR	AVELLR	274	3	11.05	341	1	1	0	0	1564943	0.0000		479	0.0	y3	180301	396	65196321315687	90392642631374	0.0060	Green	4060	4012842	4012853	190398	3578	3578.00	1.00	1	4012842
NCDO2118_RS07190	ATP-dependent 6-phosphofructokinase 1501063:1502085 reverse MW:35806	Regular	60740330	0	358627035	106	11	23	56.76	593978	532853	433359	0	15	Pass2	InSource	None	8715247	LAGIEQLK	YPEFAQVEGQLAGIEQLK	82	8	7.00	338	3	3	2	0	14094590	0.0000		912	0.0	y6y7y8	348814	845	108059786919021	176119573838043	0.0039	Green	20632	8715225	8715234	340359	2324	2324.00	1.34	1	8715225
NCDO2118_RS07190	ATP-dependent 6-phosphofructokinase 1501063:1502085 reverse MW:35806	Regular	60740330	0	358627035	106	11	23	56.76	593978	532853	433359	0	16	Pass2	InSource	None	9644411	YPEFAQVE	YPEFAQVEGQLAGIEQLK	72	8	3.13	338	2	2	1	0	3969755	0.0000	Missing	83	0.0	b5b6	348814	870	110180769869336	180361539738671	0.0017	Green	20605	9644394	9644401	340236	1034	1034.00	1.30	1	9644394
NCDO2118_RS07190	ATP-dependent 6-phosphofructokinase 1501063:1502085 reverse MW:35806	Regular	31702570	0	358627035	95	13	23	51.47	453226	402711	251366	1	1	Pass1	PepFrag1	None	20200386	YPEFAQVEGQLAGIEQLK	YPEFAQVEGQLAGIEQLK	72	18	3.96	2004	24	24	19	6	293231200	79683	Missing	210407	13.9	b2b3b4b5b5b6b7b7*b8b9b9b10b10b11b11b13*b17b18y1y2y3y3*y4y4*y4y5y6y7y8y9y11y11*y12y13y14y18y18*	364593	1877	183965258881789	143965258881789	0.7790	Green	30631	20200371	20200358	333362	353085	353085.00	2.35	2	10105222
NCDO2118_RS07190	ATP-dependent 6-phosphofructokinase 1501063:1502085 reverse MW:35806	Regular	31702570	0	358627035	95	13	23	51.47	453226	402711	251366	0	2	Pass1	PepFrag1	None	10135738	DGIGGVAVGIR	DGIGGVAVGIR	277	11	7.00	2001	9	9	5	1	100892700	75050		14327	4.9	b2b3b5b6b11y5y6y7y8y10y11	224047	956	117327071037588	773270710375882	0.0737	Green	4864	10135742	10135768	216894	33383	33383.00	1.88	2	5072908
NCDO2118_RS07190	ATP-dependent 6-phosphofructokinase 1501063:1502085 reverse MW:35806	Regular	31702570	0	358627035	95	13	23	51.47	453226	402711	251366	0	3	Pass1	PepFrag1	None	17138952	IAVLTSGGDAPGMNAAIR	IAVLTSGGDAPGMNAAIR	3	18	7.00	2002	19	19	9	5	151362600	76811	Identified	8806	4.5	b3b4b6b6b7b7b8b10b15b16b18y3y5y6y7*y8y9y9*y10y11y12y13y14y16y18	275558	1604	165664406959219	125664406959219	0.0358	Green	9030	17138995	17139001	241663	16243	16243.00	2.03	2	8574534
NCDO2118_RS07190	ATP-dependent 6-phosphofructokinase 1501063:1502085 reverse MW:35806	Regular	31702570	0	358627035	95	13	23	51.47	453226	402711	251366	0	4	Pass1	PepFrag1	None	8214516	AGLELYR	AGLELYR	322	7	7.00	2010	2	2	0	0	5837826	62673		5223	2.6	y4y4y7	167577	761	100774210720246	161548421440491	0.0194	Green	17796	8214496	8214517	282616	8802	8802.00	1.00	1	8214496
NCDO2118_RS07190	ATP-dependent 6-phosphofructokinase 1501063:1502085 reverse MW:35806	Regular	31702570	0	358627035	95	13	23	51.47	453226	402711	251366	0	5	Pass1	PepFrag1	None	42181129	LTEHGFPAVGLPGTIDNDIVGTDFTIGFDTAVSTVVDALDK	LTEHGFPAVGLPGTIDNDIVGTDFTIGFDTAVSTVVDALDK	111	41	3.53	2005	9	9	2	0	12419000	65952	Identified	3816	4.5	b11b12b20b23b26b31*y6y7y9y9y10y41	425059	3930	301084224596082	110542112298041	0.0154	Green	55782	42180963	42180879	510683	6975	6975.00	3.59	4	10552795
NCDO2118_RS07190	ATP-dependent 6-phosphofructokinase 1501063:1502085 reverse MW:35806	Regular	31702570	0	358627035	95	13	23	51.47	453226	402711	251366	0	6	Pass1	PepFrag1	None	20209909	FGIEGVVVIGGDGSYHGAMR	FGIEGVVVIGGDGSYHGAMR	91	20	5.22	2007	9	9	3	0	32928280	70187		1772	3.2	b5b16y1y2y3y9y11y12y14y19	297122	1857	182656123619213	817707490794755	0.0123	Green	23181	20209922	20209942	303093	5576	5576.00	3.00	3	6743356
NCDO2118_RS07190	ATP-dependent 6-phosphofructokinase 1501063:1502085 reverse MW:35806	Regular	31702570	0	358627035	95	13	23	51.47	453226	402711	251366	0	7	Pass1	PepFrag1	None	7004352	AVELLR	AVELLR	271	6	7.00	2009	2	2	1	0	245794	48917		429	2.0	y1y2y5	175205	677	932149161649599	14642983232992	0.0120	Red	18101	7004362	7004383	283971	5418	5418.00	1.00	1	7004362
NCDO2118_RS07190	ATP-dependent 6-phosphofructokinase 1501063:1502085 reverse MW:35806	Regular	31702570	0	358627035	95	13	23	51.47	453226	402711	251366	0	8	Pass1	PepFrag1	None	34386886	AISEGIEVYGINHGYAGMVAGDIFPLTSASVGDK	AISEGIEVYGINHGYAGMVAGDIFPLTSASVGDK	26	34	4.06	2006	3	3	0	1	12233950	65887	Missing	716	3.0	b12b17b18*b26*y7y15y17y18	397816	3183	261607822891141	134405215260761	0.0061	Green	39801	34386966	34386844	370707	2769	2769.00	3.00	3	11469037
NCDO2118_RS07190	ATP-dependent 6-phosphofructokinase 1501063:1502085 reverse MW:35806	Regular	31702570	0	358627035	95	13	23	51.47	453226	402711	251366	0	9	Pass1	PepFrag1	None	11996379	LNSALNNLNLN	LNSALNNLNLN	329	11	6.13	2003	1	1	0	0	1655293	57200		750	1.6	b3y3*y5y9*	286428	1116	130077574610854	90077574610854	0.0037	Yellow	9991	11996334	11996357	247016	1657	1657.00	2.00	2	6003203
NCDO2118_RS07190	ATP-dependent 6-phosphofructokinase 1501063:1502085 reverse MW:35806	Regular	31702570	0	358627035	95	13	23	51.47	453226	402711	251366	0	10	Pass2	PepFrag2	None	10375448	TFVVEVMGR	TFVVEVMGR	162	9	7.00	2008	2	2	0	0	2457645	58916		318	1.2	y6y9	233641	972	118632535023639	197265070047278	0.0020	Yellow	17340	10375328	10375345	280672	888	888.00	1.00	1	10375328
NCDO2118_RS07190	ATP-dependent 6-phosphofructokinase 1501063:1502085 reverse MW:35806	Regular	31702570	0	358627035	95	13	23	51.47	453226	402711	251366	0	11	Pass2	MissedCleavage	None	20020716	AGLELYRLNSALNNLNLN	AGLELYRLNSALNNLNLN	322	18	7.00	2011	2	2	0	0	6771873	63318		284	1.9	b8y9y9	384034	1877	183965258881789	826435059211928	0.0034	Green	43189	20020676	20020696	386161	1541	1541.00	3.00	3	6680274
NCDO2118_RS07190	ATP-dependent 6-phosphofructokinase 1501063:1502085 reverse MW:35806	Regular	31702570	0	358627035	95	13	23	51.47	453226	402711	251366	0	12	Pass2	VarMod	Oxidation M(13)	17298901	IAVLTSGGDAPGMNAAIR	IAVLTSGGDAPGMNAAIR	3	18	7.00	2012	9	9	3	2	12139210	65853	Identified	1336	2.7	b3b4b5b6b10y5y12y14y15y18	275558	1604	165664406959219	125664406959219	0.0089	Green	3726	17298920	17298925	207209	4035	4035.00	2.00	2	8654496
NCDO2118_RS07190	ATP-dependent 6-phosphofructokinase 1501063:1502085 reverse MW:35806	Regular	31702570	0	358627035	95	13	23	51.47	453226	402711	251366	0	13	Pass2	VarMod	Phosphoryl STY(3)	12796042	LNSALNNLNLN	LNSALNNLNLN	329	11	6.13	2013	0	0	0	0	1366480	56367		432	1.7	b9b5-H3PO4	286428	1116	130077574610854	90077574610854	0.0037	Yellow	20698	12796089	12796110	293681	1694	1694.00	2.00	2	6403081
NCDO2118_RS07190	ATP-dependent 6-phosphofructokinase 1501063:1502085 reverse MW:35806	Regular	31702570	0	358627035	95	13	23	51.47	453226	402711	251366	0	14	Pass2	InSource	None	7284414	GGVAVGIR	DGIGGVAVGIR	280	8	11.05	2001	3	3	0	0	3006719	0.0000		2652	0.0	b4b6y8	224047	693	946778652848494	149355730569699	0.0159	Green	4874	7284441	7284462	216961	7200	7200.00	1.00	1	7284441
NCDO2118_RS07190	ATP-dependent 6-phosphofructokinase 1501063:1502085 reverse MW:35806	Regular	31702570	0	358627035	95	13	23	51.47	453226	402711	251366	0	15	Pass2	InSource	None	6874036	GIEQLK	YPEFAQVEGQLAGIEQLK	84	6	7.00	2004	1	1	0	0	1347411	0.0000		98	0.0	b4	364593	654	910915586100609	142183117220122	0.0087	Green	30622	6874053	6874075	333332	3960	3960.00	1.00	1	6874053
NCDO2118_RS07190	ATP-dependent 6-phosphofructokinase 1501063:1502085 reverse MW:35806	Regular	25704970	0	358627035	51	7	23	36.47	67966	59766	28663	1	1	Pass1	PepFrag1	None	20200386	YPEFAQVEGQLAGIEQLK	YPEFAQVEGQLAGIEQLK	72	18	3.96	226	21	21	16	6	235580900	77822	Identified	14645	5.7	b4b5b6b7b7b8b9b10b10*b10b11b11b18y3y4y5y5*y6y7y8y10y10*y11y11*y12y13y17y18	353448	1877	183965258881789	826435059211928	0.4595	Green	6389	20200329	20200342	341090	31229	31229.00	2.58	3	6740158
NCDO2118_RS07190	ATP-dependent 6-phosphofructokinase 1501063:1502085 reverse MW:35806	Regular	25704970	0	358627035	51	7	23	36.47	67966	59766	28663	0	2	Pass1	PepFrag1	None	10135738	DGIGGVAVGIR	DGIGGVAVGIR	277	11	7.00	225	9	9	6	1	108425300	74451		6000	3.8	b3y1y3y4y5y6y7y8y9	208316	956	117327071037588	773270710375882	0.2384	Green	3842	10135758	10135777	227688	16200	16200.00	2.00	2	5072915
NCDO2118_RS07190	ATP-dependent 6-phosphofructokinase 1501063:1502085 reverse MW:35806	Regular	25704970	0	358627035	51	7	23	36.47	67966	59766	28663	0	3	Pass1	PepFrag1	None	42181129	LTEHGFPAVGLPGTIDNDIVGTDFTIGFDTAVSTVVDALDK	LTEHGFPAVGLPGTIDNDIVGTDFTIGFDTAVSTVVDALDK	111	41	3.53	227	14	14	8	1	51044650	71180	Identified	5994	5.5	b9b10b11b12b19b20y8y9y9y10y11y14y15y22y41	425281	3930	301084224596082	110542112298041	0.1815	Green	9606	42181129	42181129	510144	12337	12337.00	3.62	4	10552837
NCDO2118_RS07190	ATP-dependent 6-phosphofructokinase 1501063:1502085 reverse MW:35806	Regular	25704970	0	358627035	51	7	23	36.47	67966	59766	28663	0	4	Pass1	PepFrag1	None	34386886	AISEGIEVYGINHGYAGMVAGDIFPLTSASVGDK	AISEGIEVYGINHGYAGMVAGDIFPLTSASVGDK	26	34	4.06	229	3	3	0	1	34274230	69450	Identified	372	2.6	b15b24y10y14y14	386468	3183	261607822891141	134405215260761	0.0272	Yellow	7449	34386928	34386828	381438	1848	1848.00	3.00	3	11469024
NCDO2118_RS07190	ATP-dependent 6-phosphofructokinase 1501063:1502085 reverse MW:35806	Regular	25704970	0	358627035	51	7	23	36.47	67966	59766	28663	0	5	Pass1	PepFrag1	None	20209909	FGIEGVVVIGGDGSYHGAMR	FGIEGVVVIGGDGSYHGAMR	91	20	5.22	230	1	1	0	0	1138086	54662		32	1.7	b7	293403	1857	182656123619213	817707490794755	0.0159	Red	5788	20210024	20210038	317316	1081	1081.00	3.00	3	6743390
NCDO2118_RS07190	ATP-dependent 6-phosphofructokinase 1501063:1502085 reverse MW:35806	Regular	25704970	0	358627035	51	7	23	36.47	67966	59766	28663	0	6	Pass2	PepFrag2	None	17138952	IAVLTSGGDAPGMNAAIR	IAVLTSGGDAPGMNAAIR	3	18	7.00	228	1	1	0	0	1424424	55637	Missing	36	1.7	b15	284841	1604	165664406959219	125664406959219	0.0164	Red	5864	17138961	17138952	320133	1114	1114.00	2.00	2	8574517
NCDO2118_RS07190	ATP-dependent 6-phosphofructokinase 1501063:1502085 reverse MW:35806	Regular	25704970	0	358627035	51	7	23	36.47	67966	59766	28663	0	7	Pass2	VarMod	Phosphoryl STY(*)	17148748	VSVLGHIQRGGSPTAR	VSVLGHIQRGGSPTAR	244	16	12.40	231	1	1	0	0	1760255	56556	Missing	80	1.8	b6b8*	150545	1526	160249244219217	120249244219217	0.0226	Red	7328	17148802	17148793	376702	1533	1533.00	2.00	2	8579438
NCDO2118_RS07190	ATP-dependent 6-phosphofructokinase 1501063:1502085 reverse MW:35806	Regular	25704970	0	358627035	51	7	23	36.47	67966	59766	28663	0	8	Pass2	InSource	None	7284414	GGVAVGIR	DGIGGVAVGIR	280	8	11.05	225	1	1	0	0	3370310	0.0000		1504	0.0	y8	208316	693	946778652848494	149355730569699	0.0386	Green	3840	7284397	7284412	227640	2624	2624.00	1.00	1	7284397
NCDO2118_RS07190	ATP-dependent 6-phosphofructokinase 1501063:1502085 reverse MW:35806	Regular	5544156	0	358627035	34	6	23	33.24	78680	65733	17499	1	1	Pass1	PepFrag1	Carbamidomethyl C(19)	22691129	NAGDIALNAGIAAGADDICIPEK	NAGDIALNAGIAAGADDICIPEK	171	23	3.50	592	5	5	0	0	1753180	49877	Identified	5026	7.2	b5b7b8b13*b15*b23*y3y8y11y21*y23y23*	330020	2051	1951656614265	901104409510003	0.5907	Yellow	7853	22690974	22690974	263992	46473	46473.00	2.94	3	7570373
NCDO2118_RS07190	ATP-dependent 6-phosphofructokinase 1501063:1502085 reverse MW:35806	Regular	5544156	0	358627035	34	6	23	33.24	78680	65733	17499	0	2	Pass1	PepFrag1	None	10135738	DGIGGVAVGIR	DGIGGVAVGIR	277	11	7.00	590	8	8	3	1	57627990	65045		5840	3.5	b3b7b9y3y4y5y7y8y11	219676	956	117327071037588	773270710375882	0.1640	Green	5666	10135642	10135679	223212	12902	12902.00	1.86	2	5072857
NCDO2118_RS07190	ATP-dependent 6-phosphofructokinase 1501063:1502085 reverse MW:35806	Regular	5544156	0	358627035	34	6	23	33.24	78680	65733	17499	0	3	Pass1	PepFrag1	None	42181129	LTEHGFPAVGLPGTIDNDIVGTDFTIGFDTAVSTVVDALDK	LTEHGFPAVGLPGTIDNDIVGTDFTIGFDTAVSTVVDALDK	111	41	3.53	591	11	11	7	0	29531270	62141	Identified	2782	4.3	b10b11y6y7y8y9y11y12y13y14y15y41	417821	3930	301084224596082	110542112298041	0.0808	Green	13152	42181205	42181205	509884	6358	6358.00	3.69	4	10552856
NCDO2118_RS07190	ATP-dependent 6-phosphofructokinase 1501063:1502085 reverse MW:35806	Regular	5544156	0	358627035	34	6	23	33.24	78680	65733	17499	0	4	Pass2	MissedCleavage	None	15948224	EFKFENVVNNINK	EFKFENVVNNINK	194	13	7.08	593	1	1	0	0	1400619	48902		112	1.4	y5y7*	277464	1476	156729424604522	644862830696813	0.0117	Red	8875	15948061	15948109	283593	923	923.00	3.00	3	5322736
NCDO2118_RS07190	ATP-dependent 6-phosphofructokinase 1501063:1502085 reverse MW:35806	Regular	5544156	0	358627035	34	6	23	33.24	78680	65733	17499	0	5	Pass2	VarMod	Oxidation M(19)	20369858	FGIEGVVVIGGDGSYHGAMR	FGIEGVVVIGGDGSYHGAMR	91	20	5.22	595	4	4	1	0	2181581	50826		1407	3.5	b5b6b15y17y18y20	293963	1857	182656123619213	142656123619213	0.0920	Yellow	9560	20369817	20369782	299183	7241	7241.00	2.18	2	10189945
NCDO2118_RS07190	ATP-dependent 6-phosphofructokinase 1501063:1502085 reverse MW:35806	Regular	5544156	0	358627035	34	6	23	33.24	78680	65733	17499	0	6	Pass2	VarMod	Oxidation M(13)	17298901	IAVLTSGGDAPGMNAAIR	IAVLTSGGDAPGMNAAIR	3	18	7.00	594	3	3	1	0	3871119	53317	Missing	529	1.7	b12y17y18	289619	1604	165664406959219	125664406959219	0.0148	Yellow	5934	17298972	17298971	228020	1162	1162.00	2.00	2	8654523
NCDO2118_RS07190	ATP-dependent 6-phosphofructokinase 1501063:1502085 reverse MW:35806	Regular	5544156	0	358627035	34	6	23	33.24	78680	65733	17499	0	7	Pass2	InSource	None	7284414	GGVAVGIR	DGIGGVAVGIR	280	8	11.05	590	2	2	0	0	2504855	0.0000		1803	0.0	b4y8	219676	693	946778652848494	149355730569699	0.0460	Green	5663	7284385	7284409	223152	3621	3621.00	1.00	1	7284385
NCDO2118_RS07190	ATP-dependent 6-phosphofructokinase 1501063:1502085 reverse MW:35806	Regular	8627584	0	358627035	31	7	23	14.12	49822	38918	21107	1	1	Pass1	PepFrag1	None	10135738	DGIGGVAVGIR	DGIGGVAVGIR	277	11	7.00	503	10	10	6	1	165502300	71547		8893	4.0	b3b11y3y4y5y6y7y8y9y11	217409	956	117327071037588	773270710375882	0.3815	Green	4121	10135660	10135687	226395	19006	19006.00	1.91	2	5072866
NCDO2118_RS07190	ATP-dependent 6-phosphofructokinase 1501063:1502085 reverse MW:35806	Regular	8627584	0	358627035	31	7	23	14.12	49822	38918	21107	0	2	Pass1	PepFrag1	None	20200386	YPEFAQVEGQLAGIEQLK	YPEFAQVEGQLAGIEQLK	72	18	3.96	504	13	13	6	3	54946060	66758	Missing	7981	4.6	b5b6b7b8b9b10b12b14b18y4y6y6y7y9y10y18	350181	1877	183965258881789	826435059211928	0.3451	Green	10578	20200305	20200337	339863	17195	17195.00	2.54	3	6740150
NCDO2118_RS07190	ATP-dependent 6-phosphofructokinase 1501063:1502085 reverse MW:35806	Regular	8627584	0	358627035	31	7	23	14.12	49822	38918	21107	0	3	Pass1	PepFrag1	None	7004352	AVELLR	AVELLR	271	6	7.00	505	2	2	0	0	18924800	62129		1500	1.6	b4y6	191972	677	932149161649599	14642983232992	0.0545	Green	2443	7004349	7004360	190947	2717	2717.00	1.00	1	7004349
NCDO2118_RS07190	ATP-dependent 6-phosphofructokinase 1501063:1502085 reverse MW:35806	Regular	8627584	0	358627035	31	7	23	14.12	49822	38918	21107	0	4	Pass2	PepFrag2	None	11996379	LNSALNNLNLN	LNSALNNLNLN	329	11	6.13	506	1	1	0	0	934119	49063		186	1.3	b4*b6b6*	246889	1116	130077574610854	90077574610854	0.0174	Red	5431	11996509	11996531	246878	865	865.00	2.00	2	6003291
NCDO2118_RS07190	ATP-dependent 6-phosphofructokinase 1501063:1502085 reverse MW:35806	Regular	8627584	0	358627035	31	7	23	14.12	49822	38918	21107	0	5	Pass2	MissedCleavage	None	29725152	GGTFLYSARYPEFAQVEGQLAGIEQLK	GGTFLYSARYPEFAQVEGQLAGIEQLK	63	27	4.56	507	1	1	0	0	439065	45784	Missing	50	1.9	b7	373030	2754	237539365170201	787696825851004	0.0217	Red	9575	29725069	29725069	317731	1079	1079.00	4.00	4	7438822
NCDO2118_RS07190	ATP-dependent 6-phosphofructokinase 1501063:1502085 reverse MW:35806	Regular	8627584	0	358627035	31	7	23	14.12	49822	38918	21107	0	6	Pass2	MissedCleavage	None	15948224	EFKFENVVNNINK	EFKFENVVNNINK	194	13	7.08	508	1	1	0	0	1421247	50886		248	1.4	b5y6	235896	1476	156729424604522	644862830696813	0.0173	Yellow	5693	15948076	15948132	247900	864	864.00	3.00	3	5322740
NCDO2118_RS07190	ATP-dependent 6-phosphofructokinase 1501063:1502085 reverse MW:35806	Regular	8627584	0	358627035	31	7	23	14.12	49822	38918	21107	0	7	Pass2	VarMod	Phosphoryl STY(13)	25172571	NHHIIVLAEGVMTGEEFATKLK	NHHIIVLAEGVMTGEEFATKLK	213	22	6.04	509	1	1	0	0	703202	47830		130	2.9	b12*b13y11-H3PO4	391231	2310	211268275550397	100845517033598	0.0817	Red	10691	25172477	25172458	343261	4068	4068.00	2.71	3	8397541
NCDO2118_RS07190	ATP-dependent 6-phosphofructokinase 1501063:1502085 reverse MW:35806	Regular	8627584	0	358627035	31	7	23	14.12	49822	38918	21107	0	8	Pass2	InSource	None	7284414	GGVAVGIR	DGIGGVAVGIR	280	8	11.05	503	2	2	0	0	3384005	0.0000		2119	0.0	b4y8	217409	693	946778652848494	149355730569699	0.0808	Green	4120	7284417	7284428	226385	4028	4028.00	1.00	1	7284417
NCDO2118_RS07190	ATP-dependent 6-phosphofructokinase 1501063:1502085 reverse MW:35806	Regular	26765780	0	358627035	29	3	23	7.06	172369	161194	142281	1	1	Pass1	PepFrag1	None	10135738	DGIGGVAVGIR	DGIGGVAVGIR	277	11	7.00	502	18	18	14	7	802549000	83321		132606	8.5	b2b3b4b4b5b5b6b7b8b9b11b11y2y3y4y5y6y7y8y9y10y11	219746	956	117327071037588	773270710375882	0.8754	Green	9158	10135769	10135792	226058	150887	150887.00	1.69	2	5072921
NCDO2118_RS07190	ATP-dependent 6-phosphofructokinase 1501063:1502085 reverse MW:35806	Regular	26765780	0	358627035	29	3	23	7.06	172369	161194	142281	0	2	Pass1	PepFrag1	None	7004352	AVELLR	AVELLR	271	6	7.00	503	5	5	1	1	44856480	70794		6337	2.5	b3b4y1y3y6	187287	677	932149161649599	14642983232992	0.0553	Green	5361	7004334	7004348	191796	9534	9534.00	1.00	1	7004334
NCDO2118_RS07190	ATP-dependent 6-phosphofructokinase 1501063:1502085 reverse MW:35806	Regular	26765780	0	358627035	29	3	23	7.06	172369	161194	142281	0	3	Pass1	PepFrag1	None	8214516	AGLELYR	AGLELYR	322	7	7.00	501	2	2	0	0	455209	50858		172	1.1	b5b7y1	183719	761	100774210720246	161548421440491	0.0045	Yellow	7035	8214475	8214487	207670	773	773.00	1.00	1	8214475
NCDO2118_RS07190	ATP-dependent 6-phosphofructokinase 1501063:1502085 reverse MW:35806	Regular	26765780	0	358627035	29	3	23	7.06	172369	161194	142281	0	4	Pass2	InSource	None	5153300	AVGIR	DGIGGVAVGIR	283	5	11.05	502	4	4	1	1	9265791	0.0000		3166	0.0	b2b3y3y5	219746	492	75347648430133	110695296860266	0.0583	Green	9129	5153298	5153314	225931	10051	10051.00	1.00	1	5153298
NCDO2118_RS07190	ATP-dependent 6-phosphofructokinase 1501063:1502085 reverse MW:35806	Regular	26765780	0	358627035	29	3	23	7.06	172369	161194	142281	0	5	Pass2	InSource	None	8985469	GIGGVAVGIR	DGIGGVAVGIR	278	10	11.05	502	0	0	0	0	1869631	0.0000		0	0.0		219746	865	109758215932617	697582159326165	0.0065	Green	9133	8985458	8985482	225958	1124	1124.00	2.00	2	4497765
NCDO2118_RS07190	ATP-dependent 6-phosphofructokinase 1501063:1502085 reverse MW:35806	Regular	51003910	0	358627035	67	7	23	31.76	277219	258655	198926	1	1	Pass1	PepFrag1	None	20200386	YPEFAQVEGQLAGIEQLK	YPEFAQVEGQLAGIEQLK	72	18	3.96	296	25	25	18	7	414554500	83252	Identified	76912	9.8	b2b3b4b5b6b7b8*b9b10b10b11b11*b12b13b13*b14b17y2y3y4y4y5y6y6y7y8y9*y10y10*y11y15y17y18y18*	344976	1877	183965258881789	143965258881789	0.4845	Green	15712	20200387	20200353	339924	134304	134304.00	2.41	2	10105230
NCDO2118_RS07190	ATP-dependent 6-phosphofructokinase 1501063:1502085 reverse MW:35806	Regular	51003910	0	358627035	67	7	23	31.76	277219	258655	198926	0	2	Pass1	PepFrag1	None	10135738	DGIGGVAVGIR	DGIGGVAVGIR	277	11	7.00	295	18	18	14	6	775244500	85970		94446	6.9	b2b3b3b4b5b5b6b7b7b8b9b11b11y1y2y3y4y5y6y7y8y9y10y11	223183	956	117327071037588	773270710375882	0.3116	Green	6247	10135752	10135777	226454	86384	86384.00	1.78	2	5072912
NCDO2118_RS07190	ATP-dependent 6-phosphofructokinase 1501063:1502085 reverse MW:35806	Regular	51003910	0	358627035	67	7	23	31.76	277219	258655	198926	0	3	Pass1	PepFrag1	None	7004352	AVELLR	AVELLR	271	6	7.00	299	8	8	4	3	189604800	79855		23426	4.0	b2b3b4b5y1y3y4y6	191728	677	932149161649599	14642983232992	0.1370	Green	3375	7004348	7004365	190822	37967	37967.00	1.00	1	7004348
NCDO2118_RS07190	ATP-dependent 6-phosphofructokinase 1501063:1502085 reverse MW:35806	Regular	51003910	0	358627035	67	7	23	31.76	277219	258655	198926	0	4	Pass1	PepFrag1	None	29044724	NEELVESPILGTAEEGALFSLTTEGGIK	NEELVESPILGTAEEGALFSLTTEGGIK	288	28	3.58	297	3	3	1	0	7283297	65699	Missing	548	2.4	b6b11b14*y7y9y10	416765	2710	235002506696719	116668337797813	0.0065	Green	18331	29044829	29044779	407183	1796	1796.00	3.00	3	9688325
NCDO2118_RS07190	ATP-dependent 6-phosphofructokinase 1501063:1502085 reverse MW:35806	Regular	51003910	0	358627035	67	7	23	31.76	277219	258655	198926	0	5	Pass2	PepFrag2	None	11906164	FENVVNNINK	FENVVNNINK	197	10	7.00	298	1	1	0	0	1010009	57119		170	1.6	b7y1y5*	186768	1097	128596965077436	885969650774356	0.0062	Green	1840	11906302	11906322	162754	1713	1713.00	2.00	2	5958187
NCDO2118_RS07190	ATP-dependent 6-phosphofructokinase 1501063:1502085 reverse MW:35806	Regular	51003910	0	358627035	67	7	23	31.76	277219	258655	198926	0	6	Pass2	MissedCleavage	None	23812282	GKNHHIIVLAEGVMTGEEFATK	GKNHHIIVLAEGVMTGEEFATK	211	22	6.04	300	3	3	1	0	3074919	61954		164	2.5	y10y11y15	283064	2234	206608608795017	977390725300111	0.0092	Green	17259	23812055	23812049	374345	2552	2552.00	2.69	3	7944067
NCDO2118_RS07190	ATP-dependent 6-phosphofructokinase 1501063:1502085 reverse MW:35806	Regular	51003910	0	358627035	67	7	23	31.76	277219	258655	198926	0	7	Pass2	VarMod	Phosphoryl STY(6)	15297948	GDLRVSVLGHIQR	GDLRVSVLGHIQR	240	13	10.89	301	2	2	0	0	2893705	61691		313	1.4	b10b13b13*y8*	206916	1370	149132859655726	109132859655726	0.0034	Green	12099	15297962	15297967	291164	949	949.00	2.00	2	7654017
NCDO2118_RS07190	ATP-dependent 6-phosphofructokinase 1501063:1502085 reverse MW:35806	Regular	51003910	0	358627035	67	7	23	31.76	277219	258655	198926	0	8	Pass2	InSource	None	5153300	AVGIR	DGIGGVAVGIR	283	5	11.05	295	4	4	1	0	9411474	0.0000		2317	0.0	b2b3y1y5	223183	492	75347648430133	110695296860266	0.0274	Green	6233	5153276	5153294	226343	7587	7587.00	1.00	1	5153276
NCDO2118_RS07190	ATP-dependent 6-phosphofructokinase 1501063:1502085 reverse MW:35806	Regular	51003910	0	358627035	67	7	23	31.76	277219	258655	198926	0	9	Pass2	InSource	None	6693566	DGIGGVAV	DGIGGVAVGIR	277	8	3.10	295	0	0	0	0	6077068	0.0000		31	0.0	b7	223183	636	894123915508906	138824783101781	0.0053	Green	6238	6693549	6693566	226352	1462	1462.00	1.00	1	6693549
NCDO2118_RS07190	ATP-dependent 6-phosphofructokinase 1501063:1502085 reverse MW:35806	Regular	51003910	0	358627035	67	7	23	31.76	277219	258655	198926	0	10	Pass2	InSource	None	6874036	GIEQLK	YPEFAQVEGQLAGIEQLK	84	6	7.00	296	2	2	0	0	1759692	0.0000		276	0.0	b2y3*y6	344976	654	910915586100609	142183117220122	0.0051	Green	15721	6873996	6874013	340010	1411	1411.00	1.00	1	6873996
NCDO2118_RS07190	ATP-dependent 6-phosphofructokinase 1501063:1502085 reverse MW:35806	Regular	51003910	0	358627035	67	7	23	31.76	277219	258655	198926	0	11	Pass2	InSource	None	4442929	VGIR	DGIGGVAVGIR	284	4	11.05	295	1	1	0	0	968257	0.0000		323	0.0	y4	223183	425	683416700833789	966833401667577	0.0039	Green	6244	4442898	4442914	226410	1094	1094.00	1.00	1	4442898
NCDO2118_RS07190	ATP-dependent 6-phosphofructokinase 1501063:1502085 reverse MW:35806	Regular	14582860	0	358627035	62	9	23	43.24	247633	222788	94728	1	1	Pass1	PepFrag1	None	20200386	YPEFAQVEGQLAGIEQLK	YPEFAQVEGQLAGIEQLK	72	18	3.96	2787	22	22	14	6	144718700	73244	Missing	71083	9.9	b4b5b6b6b7b7*b8b9b10b10b12b13b13*b14b16b17y3y4*y6y7y7*y8y9y9*y10y11y12y13y15y15y18	374501	1877	183965258881789	143965258881789	0.5706	Green	25852	20200398	20200379	335463	141288	141288.00	2.41	2	10105235
NCDO2118_RS07190	ATP-dependent 6-phosphofructokinase 1501063:1502085 reverse MW:35806	Regular	14582860	0	358627035	62	9	23	43.24	247633	222788	94728	0	2	Pass1	PepFrag1	None	10375448	TFVVEVMGR	TFVVEVMGR	162	9	7.00	2791	5	5	1	1	36695230	67285		5661	5.8	b4b9y5y5y6y9	243921	972	118632535023639	78632535023639	0.2661	Green	8854	10375395	10375418	255038	65888	65888.00	1.92	2	5192734
NCDO2118_RS07190	ATP-dependent 6-phosphofructokinase 1501063:1502085 reverse MW:35806	Regular	14582860	0	358627035	62	9	23	43.24	247633	222788	94728	0	3	Pass1	PepFrag1	None	10135738	DGIGGVAVGIR	DGIGGVAVGIR	277	11	7.00	2786	4	4	1	0	81473320	70749		6329	3.7	b8y5y7y8y11	209450	956	117327071037588	773270710375882	0.0630	Green	4009	10135734	10135757	219524	15612	15612.00	1.94	2	5072903
NCDO2118_RS07190	ATP-dependent 6-phosphofructokinase 1501063:1502085 reverse MW:35806	Regular	14582860	0	358627035	62	9	23	43.24	247633	222788	94728	0	4	Pass1	PepFrag1	None	42181129	LTEHGFPAVGLPGTIDNDIVGTDFTIGFDTAVSTVVDALDK	LTEHGFPAVGLPGTIDNDIVGTDFTIGFDTAVSTVVDALDK	111	41	3.53	2789	9	9	1	1	16079910	63701	Identified	4066	4.5	b9b9b11b16b25b26b31*y9y11y15y16y20y32y41	426411	3930	301084224596082	110542112298041	0.0291	Green	47461	42180931	42180866	510682	7200	7200.00	3.63	4	10552787
NCDO2118_RS07190	ATP-dependent 6-phosphofructokinase 1501063:1502085 reverse MW:35806	Regular	14582860	0	358627035	62	9	23	43.24	247633	222788	94728	0	5	Pass1	PepFrag1	None	17138952	IAVLTSGGDAPGMNAAIR	IAVLTSGGDAPGMNAAIR	3	18	7.00	2790	8	8	4	1	19550220	64550	Identified	3436	2.9	b3b4b5b5y8y11y12y13y18	280139	1604	165664406959219	125664406959219	0.0193	Green	10777	17138898	17138899	267165	4779	4779.00	2.00	2	8574485
NCDO2118_RS07190	ATP-dependent 6-phosphofructokinase 1501063:1502085 reverse MW:35806	Regular	14582860	0	358627035	62	9	23	43.24	247633	222788	94728	0	6	Pass1	PepFrag1	None	7004352	AVELLR	AVELLR	271	6	7.00	2792	2	2	0	0	2005037	54660		249	1.3	b4y3y5	182869	677	932149161649599	14642983232992	0.0059	Yellow	14861	7004312	7004331	287617	1462	1462.00	1.00	1	7004312
NCDO2118_RS07190	ATP-dependent 6-phosphofructokinase 1501063:1502085 reverse MW:35806	Regular	14582860	0	358627035	62	9	23	43.24	247633	222788	94728	0	7	Pass1	PepFrag1	None	20209909	FGIEGVVVIGGDGSYHGAMR	FGIEGVVVIGGDGSYHGAMR	91	20	5.22	2788	6	6	1	0	5178138	58780		1363	1.8	b18y12y14y15y18y20	311951	1857	182656123619213	817707490794755	0.0044	Yellow	35774	20209864	20209888	381688	1090	1090.00	2.73	3	6743337
NCDO2118_RS07190	ATP-dependent 6-phosphofructokinase 1501063:1502085 reverse MW:35806	Regular	14582860	0	358627035	62	9	23	43.24	247633	222788	94728	0	8	Pass2	MissedCleavage	None	21490859	KFGIEGVVVIGGDGSYHGAMR	KFGIEGVVVIGGDGSYHGAMR	90	21	7.74	2793	0	0	0	0	3073438	56515		39	2.3	b9	461735	1992	19140466729043	876031115269536	0.0090	Yellow	41277	21490910	21490927	430119	2225	2225.00	3.00	3	7170352
NCDO2118_RS07190	ATP-dependent 6-phosphofructokinase 1501063:1502085 reverse MW:35806	Regular	14582860	0	358627035	62	9	23	43.24	247633	222788	94728	0	9	Pass2	VarMod	Carbamidomethyl C(28);Oxidation M(7)	33036348	TFVVEVMGRNAGDIALNAGIAAGADDICIPEK	TFVVEVMGRNAGDIALNAGIAAGADDICIPEK	162	32	3.86	2794	4	4	0	0	3283999	56802	Missing	2375	4.0	b6b11y8y11y17*y17y31	387882	3023	25276585051311	863829252565551	0.0271	Yellow	34032	33036282	33036270	372604	6704	6704.00	3.76	4	8266625
NCDO2118_RS07190	ATP-dependent 6-phosphofructokinase 1501063:1502085 reverse MW:35806	Regular	14582860	0	358627035	62	9	23	43.24	247633	222788	94728	0	10	Pass2	InSource	None	6874036	GIEQLK	YPEFAQVEGQLAGIEQLK	84	6	7.00	2787	2	2	0	0	683185	0.0000		127	0.0	b3b5y2	374501	654	910915586100609	142183117220122	0.0056	Green	25873	6874004	6874023	335559	1385	1385.00	1.00	1	6874004
NCDO2118_RS07190	ATP-dependent 6-phosphofructokinase 1501063:1502085 reverse MW:35806	Regular	6482265	0	358627035	22	4	23	20.59	18790	16954	6119	1	1	Pass1	PepFrag1	None	20200386	YPEFAQVEGQLAGIEQLK	YPEFAQVEGQLAGIEQLK	72	18	3.96	399	9	9	3	2	25024960	62101	Missing	3925	3.7	b6b8b8b9b10y6y8y11y12y18	348570	1877	183965258881789	826435059211928	0.4942	Red	5873	20200437	20200430	342915	9286	9286.00	2.58	3	6740194
NCDO2118_RS07190	ATP-dependent 6-phosphofructokinase 1501063:1502085 reverse MW:35806	Regular	6482265	0	358627035	22	4	23	20.59	18790	16954	6119	0	2	Pass1	PepFrag1	None	10135738	DGIGGVAVGIR	DGIGGVAVGIR	277	11	7.00	398	3	3	1	0	38511130	63973		1189	2.3	y5y7y8	207029	956	117327071037588	773270710375882	0.2129	Yellow	4127	10135731	10135752	229458	4001	4001.00	2.00	2	5072902
NCDO2118_RS07190	ATP-dependent 6-phosphofructokinase 1501063:1502085 reverse MW:35806	Regular	6482265	0	358627035	22	4	23	20.59	18790	16954	6119	0	3	Pass1	PepFrag1	None	42181129	LTEHGFPAVGLPGTIDNDIVGTDFTIGFDTAVSTVVDALDK	LTEHGFPAVGLPGTIDNDIVGTDFTIGFDTAVSTVVDALDK	111	41	3.53	400	10	10	3	0	31884960	63153	Identified	962	3.5	b9b11b20b25*y6y9y10y13y14y15y23	458127	3930	301084224596082	110542112298041	0.1952	Yellow	8192	42181371	42181371	509546	3667	3667.00	4.00	4	10552897
NCDO2118_RS07190	ATP-dependent 6-phosphofructokinase 1501063:1502085 reverse MW:35806	Regular	6482265	0	358627035	22	4	23	20.59	18790	16954	6119	0	4	Pass2	PepFrag2	None	11906164	FENVVNNINK	FENVVNNINK	197	10	7.00	401	0	0	0	0	2261495	51661		43	1.6	b8	191780	1097	128596965077436	885969650774356	0.0977	Red	3785	11906445	11906460	202342	1836	1836.00	2.00	2	5958259
NCDO2118_RS07190	ATP-dependent 6-phosphofructokinase 1501063:1502085 reverse MW:35806	Regular	6921865	0	358627035	21	5	23	28.82	32335	30221	4629	1	1	Pass1	PepFrag1	None	11906164	FENVVNNINK	FENVVNNINK	197	10	7.00	904	1	1	0	0	572598	45981		129	4.0	b4b10	205428	1097	128596965077436	885969650774356	0.6494	Red	5741	11906249	11906263	187259	20997	20997.00	2.00	2	5958161
NCDO2118_RS07190	ATP-dependent 6-phosphofructokinase 1501063:1502085 reverse MW:35806	Regular	6921865	0	358627035	21	5	23	28.82	32335	30221	4629	0	2	Pass1	PepFrag1	None	42181129	LTEHGFPAVGLPGTIDNDIVGTDFTIGFDTAVSTVVDALDK	LTEHGFPAVGLPGTIDNDIVGTDFTIGFDTAVSTVVDALDK	111	41	3.53	903	14	14	7	0	53981590	65725	Identified	3381	4.7	b9b10b11b13b16b19y6y8y9y10y11y13y14y15y41	422499	3930	301084224596082	110542112298041	0.2396	Green	16999	42181222	42181222	510289	7747	7747.00	3.66	4	10552860
NCDO2118_RS07190	ATP-dependent 6-phosphofructokinase 1501063:1502085 reverse MW:35806	Regular	6921865	0	358627035	21	5	23	28.82	32335	30221	4629	0	3	Pass1	PepFrag1	None	20200386	YPEFAQVEGQLAGIEQLK	YPEFAQVEGQLAGIEQLK	72	18	3.96	902	3	3	0	0	6340345	56423	Missing	720	1.9	y3*y6y10y18	332590	1877	183965258881789	826435059211928	0.0457	Green	15130	20200342	20200363	341055	1477	1477.00	2.50	3	6740163
NCDO2118_RS07190	ATP-dependent 6-phosphofructokinase 1501063:1502085 reverse MW:35806	Regular	6921865	0	358627035	21	5	23	28.82	32335	30221	4629	0	4	Pass1	PepFrag1	None	10135738	DGIGGVAVGIR	DGIGGVAVGIR	277	11	7.00	905	2	2	0	0	1848807	51071		98	1.5	y5y7	219197	956	117327071037588	773270710375882	0.0394	Yellow	9477	10135640	10135657	226999	1274	1274.00	2.00	2	5072857
NCDO2118_RS07190	ATP-dependent 6-phosphofructokinase 1501063:1502085 reverse MW:35806	Regular	6921865	0	358627035	21	5	23	28.82	32335	30221	4629	0	5	Pass2	VarMod	Oxidation M(*);Phosphoryl STY(*)	18098564	IAVLTSGGDAPGMNAAIR	IAVLTSGGDAPGMNAAIR	3	18	7.00	906	1	1	0	0	1467617	50068	Identified	301	1.5	b6-H3PO4b18-H3PO4y8*y17	284673	1604	165664406959219	125664406959219	0.0260	Yellow	8783	18098711	18098703	220034	840	840.00	2.00	2	9054392
NCDO2118_RS07190	ATP-dependent 6-phosphofructokinase 1501063:1502085 reverse MW:35806	Regular	28320460	0	358627035	28	5	23	17.65	157537	143021	51981	1	1	Pass1	PepFrag1	None	10135738	DGIGGVAVGIR	DGIGGVAVGIR	277	11	7.00	384	15	15	11	3	839090700	83759		41750	6.7	b2b3b3b5b5b6b11b11y1y2y3y4y5y6y7y8y9y10y11	217946	956	117327071037588	773270710375882	0.4990	Green	8686	10135707	10135733	226244	78607	78607.00	1.84	2	5072890
NCDO2118_RS07190	ATP-dependent 6-phosphofructokinase 1501063:1502085 reverse MW:35806	Regular	28320460	0	358627035	28	5	23	17.65	157537	143021	51981	0	2	Pass1	PepFrag1	None	7004352	AVELLR	AVELLR	271	6	7.00	385	6	6	2	1	55759960	71984		5643	2.4	b2b3b4y1y3y6	190990	677	932149161649599	14642983232992	0.0574	Green	5277	7004358	7004371	192388	9035	9035.00	1.00	1	7004358
NCDO2118_RS07190	ATP-dependent 6-phosphofructokinase 1501063:1502085 reverse MW:35806	Regular	28320460	0	358627035	28	5	23	17.65	157537	143021	51981	0	3	Pass2	PepFrag2	None	11996379	LNSALNNLNLN	LNSALNNLNLN	329	11	6.13	386	2	2	0	0	1764045	56986		2616	5.9	b5*b11y10*y11	269797	1116	130077574610854	90077574610854	0.3515	Green	10338	11996494	11996515	247242	55379	55379.00	1.98	2	6003283
NCDO2118_RS07190	ATP-dependent 6-phosphofructokinase 1501063:1502085 reverse MW:35806	Regular	28320460	0	358627035	28	5	23	17.65	157537	143021	51981	0	4	Pass2	PepFrag2	Carbamidomethyl C(19)	22691129	NAGDIALNAGIAAGADDICIPEK	NAGDIALNAGIAAGADDICIPEK	171	23	3.50	388	2	2	0	0	1239553	55454	Missing	704	3.9	b9b12b13*b15*b16*b18b22b23*y7	313149	2051	1951656614265	901104409510003	0.0532	Yellow	11871	22691216	22691219	265794	8384	8384.00	2.92	3	7570454
NCDO2118_RS07190	ATP-dependent 6-phosphofructokinase 1501063:1502085 reverse MW:35806	Regular	28320460	0	358627035	28	5	23	17.65	157537	143021	51981	0	5	Pass2	PepFrag2	None	10375448	TFVVEVMGR	TFVVEVMGR	162	9	7.00	387	0	0	0	0	1831738	57150		41	1.8	y6	244971	972	118632535023639	78632535023639	0.0162	Green	15140	10375621	10375647	332857	2555	2555.00	1.77	2	5192847
NCDO2118_RS07190	ATP-dependent 6-phosphofructokinase 1501063:1502085 reverse MW:35806	Regular	28320460	0	358627035	28	5	23	17.65	157537	143021	51981	0	6	Pass2	InSource	None	5153300	AVGIR	DGIGGVAVGIR	283	5	11.05	384	2	2	0	0	1835231	0.0000		841	0.0	b3y5	217946	492	75347648430133	110695296860266	0.0166	Green	8683	5153289	5153301	226238	2621	2621.00	1.00	1	5153289
NCDO2118_RS07190	ATP-dependent 6-phosphofructokinase 1501063:1502085 reverse MW:35806	Regular	28320460	0	358627035	28	5	23	17.65	157537	143021	51981	0	7	Pass2	InSource	None	6143984	VAVGIR	DGIGGVAVGIR	282	6	11.05	384	1	1	0	0	1311115	0.0000		386	0.0	y6	217946	597	85718755065108	131437510130216	0.0061	Green	8693	6143939	6143952	226290	956	956.00	1.00	1	6143939
NCDO2118_RS07190	ATP-dependent 6-phosphofructokinase 1501063:1502085 reverse MW:35806	Regular	37952870	0	358627035	65	10	23	46.47	202602	187547	100933	1	1	Pass1	PepFrag1	None	20200386	YPEFAQVEGQLAGIEQLK	YPEFAQVEGQLAGIEQLK	72	18	3.96	377	21	21	14	6	357599600	81326	Missing	51404	8.9	b3b4b6b7b8b9b10b10b11b11*b12b13b14*b16y3y4y4y5y6y6*y7y8y9*y10y10*y11y11*y16y18	333629	1877	183965258881789	143965258881789	0.5087	Green	14652	20200406	20200367	340159	103072	103072.00	2.48	2	10105239
NCDO2118_RS07190	ATP-dependent 6-phosphofructokinase 1501063:1502085 reverse MW:35806	Regular	37952870	0	358627035	65	10	23	46.47	202602	187547	100933	0	2	Pass1	PepFrag1	None	10135738	DGIGGVAVGIR	DGIGGVAVGIR	277	11	7.00	375	15	15	13	4	483639000	82638		23896	5.6	b2b3b3b4b5b5b7y1y2y3y4y5y6y7y8y9y10y11	234987	956	117327071037588	773270710375882	0.2337	Green	6118	10135658	10135683	226442	47338	47338.00	1.93	2	5072865
NCDO2118_RS07190	ATP-dependent 6-phosphofructokinase 1501063:1502085 reverse MW:35806	Regular	37952870	0	358627035	65	10	23	46.47	202602	187547	100933	0	3	Pass1	PepFrag1	None	7004352	AVELLR	AVELLR	271	6	7.00	381	7	7	3	2	96324430	75630		22495	4.0	b2b3b4b5y1y3y6	189977	677	932149161649599	14642983232992	0.1833	Green	3406	7004346	7004358	191028	37137	37137.00	1.00	1	7004346
NCDO2118_RS07190	ATP-dependent 6-phosphofructokinase 1501063:1502085 reverse MW:35806	Regular	37952870	0	358627035	65	10	23	46.47	202602	187547	100933	0	4	Pass1	PepFrag1	Carbamidomethyl C(19)	22691129	NAGDIALNAGIAAGADDICIPEK	NAGDIALNAGIAAGADDICIPEK	171	23	3.50	376	5	5	1	0	3618311	61378	Missing	445	2.2	b14*y8y10y11y13y15	334215	2051	1951656614265	901104409510003	0.0085	Green	11606	22691180	22691172	293857	1714	1714.00	2.59	3	7570442
NCDO2118_RS07190	ATP-dependent 6-phosphofructokinase 1501063:1502085 reverse MW:35806	Regular	37952870	0	358627035	65	10	23	46.47	202602	187547	100933	0	5	Pass1	PepFrag1	None	29044724	NEELVESPILGTAEEGALFSLTTEGGIK	NEELVESPILGTAEEGALFSLTTEGGIK	288	28	3.58	378	2	2	0	0	2492846	59759	Missing	376	2.3	b4b8*b14*b16*b28*y9	420322	2710	235002506696719	116668337797813	0.0082	Green	17198	29044690	29044616	407273	1665	1665.00	3.00	3	9688279
NCDO2118_RS07190	ATP-dependent 6-phosphofructokinase 1501063:1502085 reverse MW:35806	Regular	37952870	0	358627035	65	10	23	46.47	202602	187547	100933	0	6	Pass1	PepFrag1	None	42181129	LTEHGFPAVGLPGTIDNDIVGTDFTIGFDTAVSTVVDALDK	LTEHGFPAVGLPGTIDNDIVGTDFTIGFDTAVSTVVDALDK	111	41	3.53	379	6	6	2	0	7985809	64816	Identified	323	2.4	b11b13y9y10y11y13	401901	3930	301084224596082	110542112298041	0.0065	Green	18461	42181002	42181002	509703	1315	1315.00	4.00	4	10552805
NCDO2118_RS07190	ATP-dependent 6-phosphofructokinase 1501063:1502085 reverse MW:35806	Regular	37952870	0	358627035	65	10	23	46.47	202602	187547	100933	0	7	Pass1	PepFrag1	None	9714945	GGTFLYSAR	GGTFLYSAR	63	9	9.84	374	2	2	0	0	7887114	64762		146	1.3	y4y6	199519	877	110770988111791	707709881117911	0.0056	Green	3922	9714988	9715014	198435	1140	1140.00	2.00	2	4862530
NCDO2118_RS07190	ATP-dependent 6-phosphofructokinase 1501063:1502085 reverse MW:35806	Regular	37952870	0	358627035	65	10	23	46.47	202602	187547	100933	0	8	Pass2	PepFrag2	None	10375448	TFVVEVMGR	TFVVEVMGR	162	9	7.00	380	1	1	0	0	1976023	58750		163	1.1	b6y5y5	242326	972	118632535023639	78632535023639	0.0037	Green	9029	10375302	10375327	260224	750	750.00	2.00	2	5192688
NCDO2118_RS07190	ATP-dependent 6-phosphofructokinase 1501063:1502085 reverse MW:35806	Regular	37952870	0	358627035	65	10	23	46.47	202602	187547	100933	0	9	Pass2	MissedCleavage	None	15948224	EFKFENVVNNINK	EFKFENVVNNINK	194	13	7.08	383	2	2	0	0	2284744	59381		639	2.1	b4b10y13	222258	1476	156729424604522	116729424604522	0.0141	Green	7281	15948189	15948188	241398	2856	2856.00	2.00	2	7979131
NCDO2118_RS07190	ATP-dependent 6-phosphofructokinase 1501063:1502085 reverse MW:35806	Regular	37952870	0	358627035	65	10	23	46.47	202602	187547	100933	0	10	Pass2	MissedCleavage	Carbamidomethyl C(28)	32876399	TFVVEVMGRNAGDIALNAGIAAGADDICIPEK	TFVVEVMGRNAGDIALNAGIAAGADDICIPEK	162	32	3.86	382	0	0	0	0	8155951	64907	Missing	47	2.4	b14*	361668	3023	25276585051311	12851056700874	0.0082	Green	15223	32876556	32876429	351960	1666	1666.00	3.00	3	10965567
NCDO2118_RS07190	ATP-dependent 6-phosphofructokinase 1501063:1502085 reverse MW:35806	Regular	37952870	0	358627035	65	10	23	46.47	202602	187547	100933	0	11	Pass2	InSource	None	5153300	AVGIR	DGIGGVAVGIR	283	5	11.05	375	2	2	0	0	1599094	0.0000		578	0.0	y1y5	234987	492	75347648430133	110695296860266	0.0092	Green	6114	5153285	5153298	226406	1859	1859.00	1.00	1	5153285
NCDO2118_RS07190	ATP-dependent 6-phosphofructokinase 1501063:1502085 reverse MW:35806	Regular	37952870	0	358627035	65	10	23	46.47	202602	187547	100933	0	12	Pass2	InSource	None	6874036	GIEQLK	YPEFAQVEGQLAGIEQLK	84	6	7.00	377	1	1	0	0	1880952	0.0000		110	0.0	y6	333629	654	910915586100609	142183117220122	0.0054	Green	14642	6874020	6874033	340037	1089	1089.00	1.00	1	6874020
NCDO2118_RS07190	ATP-dependent 6-phosphofructokinase 1501063:1502085 reverse MW:35806	Regular	37952870	0	358627035	65	10	23	46.47	202602	187547	100933	0	13	Pass2	InSource	None	7584407	AGIEQLK	YPEFAQVEGQLAGIEQLK	83	7	7.00	377	1	1	0	0	904587	0.0000		311	0.0	y7	333629	721	97211238753916	154422477507832	0.0049	Green	14655	7584392	7584403	340220	1001	1001.00	1.00	1	7584392
NCDO2118_RS07190	ATP-dependent 6-phosphofructokinase 1501063:1502085 reverse MW:35806	Regular	8375910	0	358627035	50	11	23	42.94	143619	112899	70814	1	1	Pass1	PepFrag1	None	20200386	YPEFAQVEGQLAGIEQLK	YPEFAQVEGQLAGIEQLK	72	18	3.96	3213	18	18	11	5	98465100	69163	Missing	53580	8.7	b4b5b6b7b8*b9b10b10b11b11b12b13b14y4y5*y6y7y7*y8y10y11*y11y13y14y16y18y18*	370799	1877	183965258881789	143965258881789	0.6827	Green	24782	20200386	20200381	335875	98055	98055.00	2.42	2	10105229
NCDO2118_RS07190	ATP-dependent 6-phosphofructokinase 1501063:1502085 reverse MW:35806	Regular	8375910	0	358627035	50	11	23	42.94	143619	112899	70814	0	2	Pass1	PepFrag1	None	10375448	TFVVEVMGR	TFVVEVMGR	162	9	7.00	3217	1	1	0	0	3073786	54107		1478	2.9	b6y9	253847	972	118632535023639	78632535023639	0.0649	Red	7580	10375436	10375463	248289	9314	9314.00	1.82	2	5192754
NCDO2118_RS07190	ATP-dependent 6-phosphofructokinase 1501063:1502085 reverse MW:35806	Regular	8375910	0	358627035	50	11	23	42.94	143619	112899	70814	0	3	Pass1	PepFrag1	None	42181129	LTEHGFPAVGLPGTIDNDIVGTDFTIGFDTAVSTVVDALDK	LTEHGFPAVGLPGTIDNDIVGTDFTIGFDTAVSTVVDALDK	111	41	3.53	3214	8	8	0	0	14148150	60737	Identified	2890	4.1	b11b14b18y6y10y12y15y15y29y41	425470	3930	301084224596082	110542112298041	0.0385	Yellow	46478	42181207	42181087	510718	5530	5530.00	3.57	4	10552856
NCDO2118_RS07190	ATP-dependent 6-phosphofructokinase 1501063:1502085 reverse MW:35806	Regular	8375910	0	358627035	50	11	23	42.94	143619	112899	70814	0	4	Pass1	PepFrag1	None	10135738	DGIGGVAVGIR	DGIGGVAVGIR	277	11	7.00	3212	2	2	0	1	20293440	62304		593	2.4	b3y8	221636	956	117327071037588	773270710375882	0.0324	Green	3806	10135764	10135791	217410	4657	4657.00	2.00	2	5072918
NCDO2118_RS07190	ATP-dependent 6-phosphofructokinase 1501063:1502085 reverse MW:35806	Regular	8375910	0	358627035	50	11	23	42.94	143619	112899	70814	0	5	Pass1	PepFrag1	None	17138952	IAVLTSGGDAPGMNAAIR	IAVLTSGGDAPGMNAAIR	3	18	7.00	3215	4	4	1	0	7919108	58217	Missing	1075	2.8	b5b6y11y11y13y14y18	279186	1604	165664406959219	125664406959219	0.0307	Yellow	6794	17138973	17138984	243827	4410	4410.00	2.00	2	8574523
NCDO2118_RS07190	ATP-dependent 6-phosphofructokinase 1501063:1502085 reverse MW:35806	Regular	8375910	0	358627035	50	11	23	42.94	143619	112899	70814	0	6	Pass1	PepFrag1	None	20209909	FGIEGVVVIGGDGSYHGAMR	FGIEGVVVIGGDGSYHGAMR	91	20	5.22	3216	5	5	1	0	2848204	53776		330	1.9	b2b3b5b14y1y16	314284	1857	182656123619213	817707490794755	0.0098	Red	26684	20209904	20209936	345154	1411	1411.00	2.64	3	6743350
NCDO2118_RS07190	ATP-dependent 6-phosphofructokinase 1501063:1502085 reverse MW:35806	Regular	8375910	0	358627035	50	11	23	42.94	143619	112899	70814	0	7	Pass1	PepFrag1	None	8214516	AGLELYR	AGLELYR	322	7	7.00	3218	2	2	0	0	2008165	52258		105	1.1	b4y4	179767	761	100774210720246	161548421440491	0.0060	Red	14282	8214432	8214458	288762	862	862.00	1.00	1	8214432
NCDO2118_RS07190	ATP-dependent 6-phosphofructokinase 1501063:1502085 reverse MW:35806	Regular	8375910	0	358627035	50	11	23	42.94	143619	112899	70814	0	8	Pass2	PepFrag2	None	11996379	LNSALNNLNLN	LNSALNNLNLN	329	11	6.13	3219	2	2	0	0	2809662	53717		454	1.3	b3b6y5*y7*y9*	272223	1116	130077574610854	90077574610854	0.0066	Red	9563	11996484	11996510	262350	948	948.00	2.00	2	6003278
NCDO2118_RS07190	ATP-dependent 6-phosphofructokinase 1501063:1502085 reverse MW:35806	Regular	8375910	0	358627035	50	11	23	42.94	143619	112899	70814	0	9	Pass2	MissedCleavage	None	21490859	KFGIEGVVVIGGDGSYHGAMR	KFGIEGVVVIGGDGSYHGAMR	90	21	7.74	3220	0	0	0	0	2527105	53257		34	1.8	b12	471470	1992	19140466729043	876031115269536	0.0079	Red	43449	21490970	21490996	466271	1135	1135.00	3.00	3	7170372
NCDO2118_RS07190	ATP-dependent 6-phosphofructokinase 1501063:1502085 reverse MW:35806	Regular	8375910	0	358627035	50	11	23	42.94	143619	112899	70814	0	10	Pass2	MissedCleavage	None	20020716	AGLELYRLNSALNNLNLN	AGLELYRLNSALNNLNLN	322	18	7.00	3221	1	1	0	0	1540969	51108		214	1.6	b8y5y8*	383997	1877	183965258881789	826435059211928	0.0070	Red	38613	20020774	20020806	417005	1004	1004.00	3.00	3	6680306
NCDO2118_RS07190	ATP-dependent 6-phosphofructokinase 1501063:1502085 reverse MW:35806	Regular	8375910	0	358627035	50	11	23	42.94	143619	112899	70814	0	11	Pass2	VarMod	Phosphoryl STY(13)	25172571	NHHIIVLAEGVMTGEEFATKLK	NHHIIVLAEGVMTGEEFATKLK	213	22	6.04	3222	6	6	2	0	5992156	57006		10030	4.5	b5b6b7b9b11*b13b13*b13-H3PO4b14y5y8y22y22*	382829	2310	211268275550397	100845517033598	0.0944	Yellow	25566	25172512	25172515	339673	13557	13557.00	2.55	3	8397553
NCDO2118_RS07190	ATP-dependent 6-phosphofructokinase 1501063:1502085 reverse MW:35806	Regular	8375910	0	358627035	50	11	23	42.94	143619	112899	70814	0	12	Pass2	InSource	None	7144046	NHHIIV	NHHIIVLAEGVMTGEEFATKLK	213	6	8.01	3222	1	1	0	0	3589955	0.0000		31	0.0	b4	382829	685	939478145556335	147895629111267	0.0113	Yellow	25498	7144026	7144050	339415	1618	1618.00	1.00	1	7144026
NCDO2118_RS07190	ATP-dependent 6-phosphofructokinase 1501063:1502085 reverse MW:35806	Regular	8375910	0	358627035	50	11	23	42.94	143619	112899	70814	0	13	Pass2	InSource	None	6874036	GIEQLK	YPEFAQVEGQLAGIEQLK	84	6	7.00	3213	0	0	0	0	399451	0.0000		0	0.0		370799	654	910915586100609	142183117220122	0.0078	Green	24861	6874046	6874070	336240	1118	1118.00	1.00	1	6874046
NCDO2118_RS07190	ATP-dependent 6-phosphofructokinase 1501063:1502085 reverse MW:35806	Regular	4461557	0.75	358627035	27	6	23	28.82	48780	18404	8595	1	1	Pass1	PepFrag1	None	42181129	LTEHGFPAVGLPGTIDNDIVGTDFTIGFDTAVSTVVDALDK	LTEHGFPAVGLPGTIDNDIVGTDFTIGFDTAVSTVVDALDK	111	41	3.53	698	12	12	5	0	30789160	61379	Identified	4554	5.3	b6b8b10b11b19y8y9y10y11y12y15y41	429521	3930	301084224596082	110542112298041	0.2241	Green	14424	42181479	42181479	510087	10934	10934.00	3.68	4	10552924
NCDO2118_RS07190	ATP-dependent 6-phosphofructokinase 1501063:1502085 reverse MW:35806	Regular	4461557	0.75	358627035	27	6	23	28.82	48780	18404	8595	0	2	Pass1	PepFrag1	None	20200386	YPEFAQVEGQLAGIEQLK	YPEFAQVEGQLAGIEQLK	72	18	3.96	697	6	6	2	0	5079370	53553	Missing	2440	3.3	b6b7b10b10y6y7y18	325274	1877	183965258881789	826435059211928	0.1354	Yellow	12337	20200307	20200308	340878	6605	6605.00	2.54	3	6740151
NCDO2118_RS07190	ATP-dependent 6-phosphofructokinase 1501063:1502085 reverse MW:35806	Regular	4461557	0.75	358627035	27	6	23	28.82	48780	18404	8595	0	3	Pass1	PepFrag1	Carbamidomethyl C(19)	22691129	NAGDIALNAGIAAGADDICIPEK	NAGDIALNAGIAAGADDICIPEK	171	23	3.50	696	2	2	0	0	2280628	50075	Missing	231	1.7	y5y10y16*	329229	2051	1951656614265	901104409510003	0.0177	Yellow	9627	22691065	22691057	269582	865	865.00	3.00	3	7570403
NCDO2118_RS07190	ATP-dependent 6-phosphofructokinase 1501063:1502085 reverse MW:35806	Regular	4461557	0.75	358627035	27	6	23	28.82	48780	18404	8595	0	4	Pass2	PepFrag2	None	5453406	VLASR	VLASR	262	5	11.05	701	2	2	0	0	2362702	50229		209	2.0	b3b5y4	89020	517	778789336328781	115757867265756	0.5319	Yellow	1910	5453280	5453292	149089	25944	25944.00	1.00	1	5453280
NCDO2118_RS07190	ATP-dependent 6-phosphofructokinase 1501063:1502085 reverse MW:35806	Regular	4461557	0.75	358627035	27	6	23	28.82	48780	18404	8595	0	5	Pass2	PepFrag2	None	10135738	DGIGGVAVGIR	DGIGGVAVGIR	277	11	7.00	700	4	4	1	0	8988851	56032		1033	2.0	b6b9y4y5y8	219182	956	117327071037588	773270710375882	0.0601	Yellow	7133	10135508	10135523	225115	2932	2932.00	2.00	2	5072791
NCDO2118_RS07190	ATP-dependent 6-phosphofructokinase 1501063:1502085 reverse MW:35806	Regular	4461557	0.75	358627035	27	6	23	28.82	48780	18404	8595	0	6	Pass2	VarMod	Oxidation M(7)	10535397	TFVVEVMGR	TFVVEVMGR	162	9	7.00	699	1	1	0	0	576620	44104		128	1.5	b8y7	252300	972	118632535023639	78632535023639	0.0308	Red	7174	10535469	10535483	225511	1500	1500.00	2.00	2	5272771
NCDO2118_RS07190	ATP-dependent 6-phosphofructokinase 1501063:1502085 reverse MW:35806	Regular	6213582	1.02	358627035	30	8	23	22.35	118474	95038	64475	1	1	Pass1	PepFrag1	None	7004352	AVELLR	AVELLR	271	6	7.00	2177	7	7	4	2	178015200	70438		58967	4.0	b2b3b4b5y2y3y6	189048	677	932149161649599	14642983232992	0.7317	Green	6543	7004332	7004349	190938	86686	86686.00	1.00	1	7004332
NCDO2118_RS07190	ATP-dependent 6-phosphofructokinase 1501063:1502085 reverse MW:35806	Regular	6213582	1.02	358627035	30	8	23	22.35	118474	95038	64475	0	2	Pass1	PepFrag1	None	42181129	LTEHGFPAVGLPGTIDNDIVGTDFTIGFDTAVSTVVDALDK	LTEHGFPAVGLPGTIDNDIVGTDFTIGFDTAVSTVVDALDK	111	41	3.53	2175	10	10	3	0	20985990	61153	Identified	1269	4.0	b6b10b11b12b19y8y9y13y15y41	390866	3930	301084224596082	110542112298041	0.0426	Green	23864	42181055	42181055	510179	5042	5042.00	3.68	4	10552818
NCDO2118_RS07190	ATP-dependent 6-phosphofructokinase 1501063:1502085 reverse MW:35806	Regular	6213582	1.02	358627035	30	8	23	22.35	118474	95038	64475	0	3	Pass1	PepFrag1	None	17138952	IAVLTSGGDAPGMNAAIR	IAVLTSGGDAPGMNAAIR	3	18	7.00	2176	3	3	0	1	6615552	56139	Missing	1561	2.5	b3b16*y15y18	261305	1604	165664406959219	125664406959219	0.0279	Yellow	18647	17138940	17138930	297715	3310	3310.00	2.00	2	8574506
NCDO2118_RS07190	ATP-dependent 6-phosphofructokinase 1501063:1502085 reverse MW:35806	Regular	6213582	1.02	358627035	30	8	23	22.35	118474	95038	64475	0	4	Pass2	PepFrag2	None	8214516	AGLELYR	AGLELYR	322	7	7.00	2178	1	1	0	0	840773	47180		50	3.3	b5	192197	761	100774210720246	161548421440491	0.1436	Red	15294	8214420	8214434	261854	17008	17008.00	1.00	1	8214420
NCDO2118_RS07190	ATP-dependent 6-phosphofructokinase 1501063:1502085 reverse MW:35806	Regular	6213582	1.02	358627035	30	8	23	22.35	118474	95038	64475	0	5	Pass2	PepFrag2	None	11996379	LNSALNNLNLN	LNSALNNLNLN	329	11	6.13	2179	3	3	0	0	3963340	53914		1415	1.6	b4*b5b5*b7b7y8	255759	1116	130077574610854	90077574610854	0.0134	Yellow	11633	11996467	11996488	229540	1583	1583.00	2.00	2	6003270
NCDO2118_RS07190	ATP-dependent 6-phosphofructokinase 1501063:1502085 reverse MW:35806	Regular	6213582	1.02	358627035	30	8	23	22.35	118474	95038	64475	0	6	Pass2	PepFrag2	None	9714945	GGTFLYSAR	GGTFLYSAR	63	9	9.84	2182	1	1	0	0	1726572	50305		201	1.3	b5	209293	877	110770988111791	181541976223582	0.0084	Red	10551	9715109	9715118	221536	998	998.00	1.47	1	9715109
NCDO2118_RS07190	ATP-dependent 6-phosphofructokinase 1501063:1502085 reverse MW:35806	Regular	6213582	1.02	358627035	30	8	23	22.35	118474	95038	64475	0	7	Pass2	VarMod	Phosphoryl STY(27);Phosphoryl STY(28)	39248278	AISEGIEVYGINHGYAGMVAGDIFPLTSASVGDKIGR	AISEGIEVYGINHGYAGMVAGDIFPLTSASVGDKIGR	26	37	4.54	2181	1	1	0	0	1762086	50394	Identified	296	2.3	b10b15y10y13y14	353624	3503	278860108754707	994300543773534	0.0108	Red	21672	39248603	39248603	352305	1282	1282.00	3.51	4	9819705
NCDO2118_RS07190	ATP-dependent 6-phosphofructokinase 1501063:1502085 reverse MW:35806	Regular	6213582	1.02	358627035	30	8	23	22.35	118474	95038	64475	0	8	Pass2	VarMod	Phosphoryl STY(*)	19499626	RIAVLTSGGDAPGMNAAIR	RIAVLTSGGDAPGMNAAIR	2	19	10.89	2180	3	3	0	0	1525378	49767	Missing	501	1.8	b3b9y6	274122	1752	175704291367449	771361942449659	0.0105	Red	16379	19499608	19499626	272363	1246	1246.00	3.00	3	6506585
NCDO2118_RS07190	ATP-dependent 6-phosphofructokinase 1501063:1502085 reverse MW:35806	Regular	6213582	1.02	358627035	30	8	23	22.35	118474	95038	64475	0	9	Pass2	InSource	None	4012871	LLR	AVELLR	274	3	11.05	2177	1	1	0	0	1175171	0.0000		215	0.0	y3	189048	396	65196321315687	90392642631374	0.0111	Green	6551	4012840	4012856	191021	1319	1319.00	1.00	1	4012840
NCDO2118_RS07190	ATP-dependent 6-phosphofructokinase 1501063:1502085 reverse MW:35806	Regular	2456033	1.29	358627035	14	5	23	17.65	69768	13491	5126	1	1	Pass1	PepFrag1	None	42181129	LTEHGFPAVGLPGTIDNDIVGTDFTIGFDTAVSTVVDALDK	LTEHGFPAVGLPGTIDNDIVGTDFTIGFDTAVSTVVDALDK	111	41	3.53	1926	7	7	2	0	18672710	56614	Identified	958	4.8	b11b25*y5y7y9y10y11y13	400309	3930	301084224596082	110542112298041	0.1225	Yellow	16253	42180813	42180813	510190	8548	8548.00	3.65	4	10552758
NCDO2118_RS07190	ATP-dependent 6-phosphofructokinase 1501063:1502085 reverse MW:35806	Regular	2456033	1.29	358627035	14	5	23	17.65	69768	13491	5126	0	2	Pass1	PepFrag1	None	11906164	FENVVNNINK	FENVVNNINK	197	10	7.00	1925	2	2	0	0	3944224	49862		211	2.0	b3b4*b4b7	194085	1097	128596965077436	885969650774356	0.0447	Red	5838	11906233	11906255	192397	3122	3122.00	2.00	2	5958153
NCDO2118_RS07190	ATP-dependent 6-phosphofructokinase 1501063:1502085 reverse MW:35806	Regular	2456033	1.29	358627035	14	5	23	17.65	69768	13491	5126	0	3	Pass1	PepFrag1	None	10375448	TFVVEVMGR	TFVVEVMGR	162	9	7.00	1927	1	1	0	0	2021871	46960		50	1.6	y5	245479	972	118632535023639	78632535023639	0.0261	Red	6758	10375369	10375393	201820	1821	1821.00	2.00	2	5192721
NCDO2118_RS07190	ATP-dependent 6-phosphofructokinase 1501063:1502085 reverse MW:35806	Regular	2456033	1.29	358627035	14	5	23	17.65	69768	13491	5126	0	4	Pass2	PepFrag2	None	11996379	LNSALNNLNLN	LNSALNNLNLN	329	11	6.13	1929	2	2	0	0	1075578	44219		3124	5.9	b2b2*b7*b8*y11	259153	1116	130077574610854	90077574610854	0.7917	Red	10506	11996570	11996591	248351	55237	55237.00	1.97	2	6003322
NCDO2118_RS07190	ATP-dependent 6-phosphofructokinase 1501063:1502085 reverse MW:35806	Regular	2456033	1.29	358627035	14	5	23	17.65	69768	13491	5126	0	5	Pass2	VarMod	Phosphoryl STY(*)	22290522	KFGIEGVVVIGGDGSYHGAMR	KFGIEGVVVIGGDGSYHGAMR	90	21	7.74	1928	2	2	0	0	2933511	48576		783	1.8	b4b7	316840	1992	19140466729043	15140466729043	0.0149	Red	10030	22290558	22290502	240915	1040	1040.00	2.36	2	11150315
NCDO2118_RS07190	ATP-dependent 6-phosphofructokinase 1501063:1502085 reverse MW:35806	Regular	3293198	1.73	358627035	24	7	23	27.65	45740	34321	9844	1	1	Pass1	PepFrag1	None	10375448	TFVVEVMGR	TFVVEVMGR	162	9	7.00	2066	5	5	1	0	22756890	58747		1205	3.6	b5b9y5y6y9	247977	972	118632535023639	78632535023639	0.3794	Yellow	6380	10375421	10375448	257180	17354	17354.00	1.97	2	5192747
NCDO2118_RS07190	ATP-dependent 6-phosphofructokinase 1501063:1502085 reverse MW:35806	Regular	3293198	1.73	358627035	24	7	23	27.65	45740	34321	9844	0	2	Pass1	PepFrag1	None	20200386	YPEFAQVEGQLAGIEQLK	YPEFAQVEGQLAGIEQLK	72	18	3.96	2064	9	9	1	1	26136540	59349	Missing	7379	4.1	b6b9b10b10y4y6y8y10*y11y15y18	367423	1877	183965258881789	143965258881789	0.2788	Green	17713	20200417	20200391	336893	12751	12751.00	2.41	2	10105245
NCDO2118_RS07190	ATP-dependent 6-phosphofructokinase 1501063:1502085 reverse MW:35806	Regular	3293198	1.73	358627035	24	7	23	27.65	45740	34321	9844	0	3	Pass1	PepFrag1	Carbamidomethyl C(19)	26733189	NAGDIALNAGIAAGADDICIPEKEFK	NAGDIALNAGIAAGADDICIPEKEFK	171	26	3.86	2067	1	1	0	0	6716564	53448	Identified	459	3.2	b7*b7b8b9b25*y6y8	360234	2430	218522997895323	105681998596882	0.0922	Yellow	22336	26733138	26733109	368524	4216	4216.00	2.58	3	8917761
NCDO2118_RS07190	ATP-dependent 6-phosphofructokinase 1501063:1502085 reverse MW:35806	Regular	3293198	1.73	358627035	24	7	23	27.65	45740	34321	9844	0	4	Pass1	PepFrag1	None	42181129	LTEHGFPAVGLPGTIDNDIVGTDFTIGFDTAVSTVVDALDK	LTEHGFPAVGLPGTIDNDIVGTDFTIGFDTAVSTVVDALDK	111	41	3.53	2065	6	6	1	0	5856486	52853	Identified	328	2.9	b6b12y7y9y11y12y15	416142	3930	301084224596082	110542112298041	0.0447	Red	33613	42181308	42181308	510701	2044	2044.00	4.00	4	10552882
NCDO2118_RS07190	ATP-dependent 6-phosphofructokinase 1501063:1502085 reverse MW:35806	Regular	3293198	1.73	358627035	24	7	23	27.65	45740	34321	9844	0	5	Pass2	PepFrag2	None	10085949	VSVLGHIQR	VSVLGHIQR	244	9	11.05	2070	1	1	0	0	988964	45128		239	2.6	y6	166067	959	117572396964229	775723969642285	0.1630	Red	1907	10086156	10086184	199220	7456	7456.00	2.00	2	5048115
NCDO2118_RS07190	ATP-dependent 6-phosphofructokinase 1501063:1502085 reverse MW:35806	Regular	3293198	1.73	358627035	24	7	23	27.65	45740	34321	9844	0	6	Pass2	PepFrag2	None	9714945	GGTFLYSAR	GGTFLYSAR	63	9	9.84	2069	0	0	0	0	2307792	48808		50	1.2	y4	205530	877	110770988111791	707709881117911	0.0189	Red	12227	9714936	9714964	303220	866	866.00	2.00	2	4862504
NCDO2118_RS07190	ATP-dependent 6-phosphofructokinase 1501063:1502085 reverse MW:35806	Regular	3293198	1.73	358627035	24	7	23	27.65	45740	34321	9844	0	7	Pass2	VarMod	Carbamidomethyl C(28);Oxidation M(7)	33036348	TFVVEVMGRNAGDIALNAGIAAGADDICIPEK	TFVVEVMGRNAGDIALNAGIAAGADDICIPEK	162	32	3.86	2068	2	2	0	0	5357043	52465	Identified	184	2.1	b13y3y3y4	393055	3023	25276585051311	863829252565551	0.0230	Red	22731	33036607	33036607	370814	1053	1053.00	4.00	4	8266706
NCDO2118_RS07190	ATP-dependent 6-phosphofructokinase 1501063:1502085 reverse MW:35806	Regular	3618745	1.83	358627035	32	9	23	38.24	43037	13924	14811	1	1	Pass1	PepFrag1	None	42181129	LTEHGFPAVGLPGTIDNDIVGTDFTIGFDTAVSTVVDALDK	LTEHGFPAVGLPGTIDNDIVGTDFTIGFDTAVSTVVDALDK	111	41	3.53	2372	7	7	4	0	24227090	59429	Identified	3262	5.0	b11b11y6y7y8y9y10y41	388298	3930	301084224596082	110542112298041	0.2196	Green	24042	42181082	42181082	510437	9452	9452.00	3.67	4	10552825
NCDO2118_RS07190	ATP-dependent 6-phosphofructokinase 1501063:1502085 reverse MW:35806	Regular	3618745	1.83	358627035	32	9	23	38.24	43037	13924	14811	0	2	Pass1	PepFrag1	None	11906164	FENVVNNINK	FENVVNNINK	197	10	7.00	2371	5	5	2	0	5395866	52906		955	1.8	b2b3b5b6b9*y2	188352	1097	128596965077436	885969650774356	0.0570	Yellow	8029	11906138	11906155	190821	2454	2454.00	2.00	2	5958105
NCDO2118_RS07190	ATP-dependent 6-phosphofructokinase 1501063:1502085 reverse MW:35806	Regular	3618745	1.83	358627035	32	9	23	38.24	43037	13924	14811	0	3	Pass1	PepFrag1	None	8214516	AGLELYR	AGLELYR	322	7	7.00	2373	2	2	0	0	10304710	55716		581	1.5	y4y7	196497	761	100774210720246	161548421440491	0.0469	Yellow	10425	8214481	8214500	207949	2018	2018.00	1.27	1	8214481
NCDO2118_RS07190	ATP-dependent 6-phosphofructokinase 1501063:1502085 reverse MW:35806	Regular	3618745	1.83	358627035	32	9	23	38.24	43037	13924	14811	0	4	Pass2	PepFrag2	None	9714945	GGTFLYSAR	GGTFLYSAR	63	9	9.84	2379	3	3	0	0	5293588	52823		2629	2.3	b9y3y9	213730	877	110770988111791	181541976223582	0.1255	Yellow	12674	9714635	9714651	224037	5399	5399.00	1.07	1	9714635
NCDO2118_RS07190	ATP-dependent 6-phosphofructokinase 1501063:1502085 reverse MW:35806	Regular	3618745	1.83	358627035	32	9	23	38.24	43037	13924	14811	0	5	Pass2	PepFrag2	None	10135738	DGIGGVAVGIR	DGIGGVAVGIR	277	11	7.00	2378	3	3	0	0	5757129	53188		242	1.7	b6b8b10y8	216050	956	117327071037588	773270710375882	0.0442	Yellow	12973	10135516	10135536	225876	1901	1901.00	2.00	2	5072794
NCDO2118_RS07190	ATP-dependent 6-phosphofructokinase 1501063:1502085 reverse MW:35806	Regular	3618745	1.83	358627035	32	9	23	38.24	43037	13924	14811	0	6	Pass2	MissedCleavage	None	10085109	EAGYKGDLR	EAGYKGDLR	235	9	6.95	2374	1	1	0	0	799615	44614		1263	1.6	b5y9	115788	911	113615753267925	736157532679247	0.0440	Red	2165	10085054	10085073	137129	1893	1893.00	2.00	2	5047563
NCDO2118_RS07190	ATP-dependent 6-phosphofructokinase 1501063:1502085 reverse MW:35806	Regular	3618745	1.83	358627035	32	9	23	38.24	43037	13924	14811	0	7	Pass2	VarMod	Phosphoryl STY(*)	17938615	IAVLTSGGDAPGMNAAIR	IAVLTSGGDAPGMNAAIR	3	18	7.00	2375	8	8	0	1	4729144	52333	Missing	5373	4.7	b2b7b7-H3PO4b9b11y2y5y5*y7y9y11y12*y18	273397	1604	165664406959219	125664406959219	0.4232	Yellow	10686	17938574	17938569	209811	18212	18212.00	2.05	2	8974323
NCDO2118_RS07190	ATP-dependent 6-phosphofructokinase 1501063:1502085 reverse MW:35806	Regular	3618745	1.83	358627035	32	9	23	38.24	43037	13924	14811	0	8	Pass2	VarMod	Oxidation M(*);Phosphoryl STY(*)	35346498	AISEGIEVYGINHGYAGMVAGDIFPLTSASVGDK	AISEGIEVYGINHGYAGMVAGDIFPLTSASVGDK	26	34	4.06	2376	2	2	0	0	5147109	52701	Identified	326	2.0	b11b15*y10y11	355551	3183	261607822891141	134405215260761	0.0208	Yellow	22236	35346935	35346756	364557	895	895.00	3.00	3	11789027
NCDO2118_RS07190	ATP-dependent 6-phosphofructokinase 1501063:1502085 reverse MW:35806	Regular	3618745	1.83	358627035	32	9	23	38.24	43037	13924	14811	0	9	Pass2	VarMod	Phosphoryl STY(2)	10885612	VSVLGHIQR	VSVLGHIQR	244	9	11.05	2377	1	1	0	0	774713	44477		180	1.2	b5b6y8	156242	959	117572396964229	775723969642285	0.0189	Red	2696	10885650	10885669	143946	813	813.00	2.00	2	5447861
NCDO2118_RS07190	ATP-dependent 6-phosphofructokinase 1501063:1502085 reverse MW:35806	Regular	303393	3.75	358627035	7	3	23	15.29	48804	3993	4488	1	1	Pass1	PepFrag1	None	10135738	DGIGGVAVGIR	DGIGGVAVGIR	277	11	7.00	647	2	2	0	0	3583405	40363		388	1.5	y5y8	228698	956	117327071037588	773270710375882	0.0290	Red	4699	10135655	10135663	228698	1413	1413.00	2.00	2	5072864
NCDO2118_RS07190	ATP-dependent 6-phosphofructokinase 1501063:1502085 reverse MW:35806	Regular	303393	3.75	358627035	7	3	23	15.29	48804	3993	4488	0	2	Pass1	PepFrag1	None	42181129	LTEHGFPAVGLPGTIDNDIVGTDFTIGFDTAVSTVVDALDK	LTEHGFPAVGLPGTIDNDIVGTDFTIGFDTAVSTVVDALDK	111	41	3.53	648	1	1	0	0	1221140	35688	Missing	32	2.4	y10	509945	3930	301084224596082	110542112298041	0.0256	Red	8681	42181111	42181111	509945	1249	1249.00	4.00	4	10552832
NCDO2118_RS07190	ATP-dependent 6-phosphofructokinase 1501063:1502085 reverse MW:35806	Regular	303393	3.75	358627035	7	3	23	15.29	48804	3993	4488	0	3	Pass2	PepFrag2	None	7083787	VNNPHK	VNNPHK	316	6	10.10	649	4	4	1	1	2278208	38396	Missing	4068	4.0	b5b6y1y6	409351	640	897868943974056	139573788794811	0.9455	Red	7487	7083933	7083951	409351	46142	46142.00	1.08	1	7083933
NCDO2118_RS07200	N-acetylglucosamine-6-phosphate deacetylase 1502471:1503619 reverse MW:41211	Regular	9483596	0	413827396	43	10	20	26.70	289851	67464	90879	1	1	Pass1	PepFrag1	None	15477417	GIFFEGPFFTEEK	GIFFEGPFFTEEK	123	13	3.96	3144	11	11	7	3	194704700	72663	Identified	16655	5.9	b3b4b5y3y4y5y7y8y9y10y11y13	385234	1405	151662141384316	111662141384316	0.1647	Green	28396	15477434	15477444	371588	47742	47742.00	1.97	2	7743753
NCDO2118_RS07200	N-acetylglucosamine-6-phosphate deacetylase 1502471:1503619 reverse MW:41211	Regular	9483596	0	413827396	43	10	20	26.70	289851	67464	90879	0	2	Pass1	PepFrag1	None	19738884	MWELEDWQEAAHGMLK	MWELEDWQEAAHGMLK	149	16	4.16	3143	7	7	0	1	35636960	65289		3472	4.2	b2b4b16y8y10y12y14y15*y16	379559	1789	178169431628378	787796210855852	0.0520	Green	24493	19738927	19738938	349924	15083	15083.00	2.77	3	6586358
NCDO2118_RS07200	N-acetylglucosamine-6-phosphate deacetylase 1502471:1503619 reverse MW:41211	Regular	9483596	0	413827396	43	10	20	26.70	289851	67464	90879	0	3	Pass1	PepFrag1	None	24002302	NVIDWGIATPAEAIMMASLTPAK	NVIDWGIATPAEAIMMASLTPAK	318	23	4.07	3148	8	8	2	0	13149360	60959	Identified	964	3.1	b7b14b14b15b16*b23y7y10y14y15y17	473745	2265	208515545437082	168515545437082	0.0160	Green	36686	24002545	24002488	453497	4639	4639.00	2.40	2	12006309
NCDO2118_RS07200	N-acetylglucosamine-6-phosphate deacetylase 1502471:1503619 reverse MW:41211	Regular	9483596	0	413827396	43	10	20	26.70	289851	67464	90879	0	4	Pass1	PepFrag1	None	14137155	GADHVVLITDSMR	GADHVVLITDSMR	263	13	5.10	3146	1	1	0	0	645830	47871		68	1.4	b9y10	264199	1311	144819850668613	104819850668613	0.0028	Red	33015	14137259	14137275	409073	826	826.00	2.00	2	7073666
NCDO2118_RS07200	N-acetylglucosamine-6-phosphate deacetylase 1502471:1503619 reverse MW:41211	Regular	9483596	0	413827396	43	10	20	26.70	289851	67464	90879	0	5	Pass2	PepFrag2	None	19380807	DGAAWLPTGRPAASILTLK	DGAAWLPTGRPAASILTLK	295	19	10.12	3147	2	2	0	0	1280369	50843	Missing	362	3.1	b2b4	340538	1836	181276462984937	808509753232914	0.0188	Red	21962	19380908	19380920	336994	5450	5450.00	3.00	3	6467018
NCDO2118_RS07200	N-acetylglucosamine-6-phosphate deacetylase 1502471:1503619 reverse MW:41211	Regular	9483596	0	413827396	43	10	20	26.70	289851	67464	90879	0	6	Pass2	PepFrag2	None	10365310	GGFLEITDGK	GGFLEITDGK	18	10	4.07	3145	3	3	2	0	7578657	58566		1881	1.4	y5y6y7	234881	955	117245238725829	772452387258288	0.0042	Yellow	8996	10365389	10365415	262918	1220	1220.00	2.00	2	5187731
NCDO2118_RS07200	N-acetylglucosamine-6-phosphate deacetylase 1502471:1503619 reverse MW:41211	Regular	9483596	0	413827396	43	10	20	26.70	289851	67464	90879	0	7	Pass2	PepFrag2	None	16758366	GIFFEGPFFTEEKK	GIFFEGPFFTEEKK	123	14	4.56	3151	2	2	0	1	5318159	57027	Missing	340	1.6	b4y6y9y10	330067	1540	161227869348147	121227869348147	0.0039	Yellow	31964	16758396	16758399	393348	1129	1129.00	2.00	2	8384234
NCDO2118_RS07200	N-acetylglucosamine-6-phosphate deacetylase 1502471:1503619 reverse MW:41211	Regular	9483596	0	413827396	43	10	20	26.70	289851	67464	90879	0	8	Pass2	PepFrag2	None	7554410	IGLAPER	IGLAPER	166	7	7.00	3152	3	3	0	0	5140339	56880	Identified	413	1.1	b7y3y7	126615	710	962199661996764	152439932399353	0.0034	Yellow	3185	7554099	7554117	206922	982	982.00	1.00	1	7554099
NCDO2118_RS07200	N-acetylglucosamine-6-phosphate deacetylase 1502471:1503619 reverse MW:41211	Regular	9483596	0	413827396	43	10	20	26.70	289851	67464	90879	0	9	Pass2	MissedCleavage	None	8835360	KIGLAPER	KIGLAPER	165	8	10.12	3149	4	4	1	0	1705997	52090	Missing	66473	8.0	b8y4y5y5y6y8	265364	845	108059786919021	176119573838043	0.7283	Red	16938	8835256	8835274	310742	211094	211094.00	1.00	1	8835256
NCDO2118_RS07200	N-acetylglucosamine-6-phosphate deacetylase 1502471:1503619 reverse MW:41211	Regular	9483596	0	413827396	43	10	20	26.70	289851	67464	90879	0	10	Pass2	MissedCleavage	None	19460342	KATESGVVIALGHSNATYK	KATESGVVIALGHSNATYK	181	19	9.63	3150	2	2	0	0	5178882	56912		251	2.0	b7y5y11	388770	1821	180287769086764	801918460578428	0.0058	Yellow	30222	19460076	19460087	382811	1686	1686.00	3.00	3	6493407
NCDO2118_RS07200	N-acetylglucosamine-6-phosphate deacetylase 1502471:1503619 reverse MW:41211	Regular	585045	0	413827396	9	2	20	5.50	40387	60580.5	3718	1	1	Pass1	PepFrag1	None	15477417	GIFFEGPFFTEEK	GIFFEGPFFTEEK	123	13	3.96	1100	4	4	1	1	2983907	42420	Missing	3405	5.5	b12b13b13y1y13	396196	1405	151662141384316	111662141384316	0.9689	Red	6449	15477407	15477402	292989	39131	39131.00	2.00	2	7743740
NCDO2118_RS07200	N-acetylglucosamine-6-phosphate deacetylase 1502471:1503619 reverse MW:41211	Regular	585045	0	413827396	9	2	20	5.50	40387	60580.5	3718	0	2	Pass1	PepFrag1	None	9384214	DGSEDFIR	DGSEDFIR	173	8	3.70	1099	5	5	3	0	23087070	51306		313	1.3	y1y3y4y5y6	146972	819	105831650371297	658316503712966	0.0311	Red	4384	9384177	9384194	176392	1256	1256.00	2.00	2	4697125
NCDO2118_RS07200	N-acetylglucosamine-6-phosphate deacetylase 1502471:1503619 reverse MW:41211	Regular	6670248	0	413827396	24	7	20	14.92	49764	43086	11882	1	1	Pass1	PepFrag1	Carbamidomethyl C(3)	16187643	AVCTVVGEHYQEAR	AVCTVVGEHYQEAR	104	14	5.30	2072	12	12	9	1	165386600	70426		8999	5.8	b4b5b5y2y3y4y5y6y7y8y8*y9y9y11y12	153259	1415	152380920983341	615872806555605	0.8222	Green	3049	16187559	16187596	159217	40917	40917.00	2.66	3	5402568
NCDO2118_RS07200	N-acetylglucosamine-6-phosphate deacetylase 1502471:1503619 reverse MW:41211	Regular	6670248	0	413827396	24	7	20	14.92	49764	43086	11882	0	2	Pass1	PepFrag1	None	20659899	AAGLPDGPYMLGEYEVEVR	AAGLPDGPYMLGEYEVEVR	276	19	3.69	2073	3	3	1	0	3932050	54188	Missing	1008	1.8	b9y6y18y19	325881	1888	184683300593056	144683300593056	0.0252	Yellow	21043	20659857	20659814	338172	1255	1255.00	2.00	2	10334965
NCDO2118_RS07200	N-acetylglucosamine-6-phosphate deacetylase 1502471:1503619 reverse MW:41211	Regular	6670248	0	413827396	24	7	20	14.92	49764	43086	11882	0	3	Pass1	PepFrag1	None	6873712	TYYIK	TYYIK	1	5	9.52	2074	3	3	1	1	28297310	62759		235	1.0	b2b3b5y3	132239	634	892248458087377	138449691617475	0.0184	Green	2051	6873729	6873746	146357	914	914.00	1.00	1	6873729
NCDO2118_RS07200	N-acetylglucosamine-6-phosphate deacetylase 1502471:1503619 reverse MW:41211	Regular	6670248	0	413827396	24	7	20	14.92	49764	43086	11882	0	4	Pass2	PepFrag2	None	14137155	GADHVVLITDSMR	GADHVVLITDSMR	263	13	5.10	2075	0	0	0	0	1263593	49257		523	1.8	y8	236355	1311	144819850668613	104819850668613	0.0343	Red	4367	14137274	14137285	171515	1709	1709.00	2.00	2	7073674
NCDO2118_RS07200	N-acetylglucosamine-6-phosphate deacetylase 1502471:1503619 reverse MW:41211	Regular	6670248	0	413827396	24	7	20	14.92	49764	43086	11882	0	5	Pass2	VarMod	Phosphoryl STY(*);Phosphoryl STY(*)	19778718	ATESGVVIALGHSNATYK	ATESGVVIALGHSNATYK	182	18	7.77	2077	3	3	0	1	2078870	51420		952	2.2	b11b11b14*b16y7y12y14*y16*	224132	1686	171263447111868	131263447111868	0.0461	Yellow	17149	19778919	19778885	280339	2294	2294.00	2.00	2	9894496
NCDO2118_RS07200	N-acetylglucosamine-6-phosphate deacetylase 1502471:1503619 reverse MW:41211	Regular	6670248	0	413827396	24	7	20	14.92	49764	43086	11882	0	6	Pass2	VarMod	Phosphoryl STY(*);Phosphoryl STY(*)	21059668	KATESGVVIALGHSNATYK	KATESGVVIALGHSNATYK	181	19	9.63	2078	2	2	0	0	2092948	51449		78	2.1	b15y12	252230	1821	180287769086764	140287769086764	0.0374	Yellow	20358	21059895	21059847	324366	1862	1862.00	2.29	2	10534984
NCDO2118_RS07200	N-acetylglucosamine-6-phosphate deacetylase 1502471:1503619 reverse MW:41211	Regular	6670248	0	413827396	24	7	20	14.92	49764	43086	11882	0	7	Pass2	VarMod	Phosphoryl STY(10)	15906876	ADQFFYAYETKK	ADQFFYAYETKK	6	12	6.89	2076	1	1	0	0	1236555	49164		87	1.3	b6y4	231172	1363	148624430928756	108624430928756	0.0163	Red	6483	15906844	15906844	190481	813	813.00	2.00	2	7958458
NCDO2118_RS07200	N-acetylglucosamine-6-phosphate deacetylase 1502471:1503619 reverse MW:41211	Regular	11600360	0	413827396	48	10	20	30.63	140798	122447	40356	1	1	Pass1	PepFrag1	None	15477417	GIFFEGPFFTEEK	GIFFEGPFFTEEK	123	13	3.96	3969	11	11	7	3	138555100	72061	Identified	26780	7.4	b2b3b4b5b11b12y2y3y4y4y5y7y8y9y10y11	386194	1405	151662141384316	111662141384316	0.6120	Green	39016	15477447	15477460	367220	86168	86168.00	2.00	2	7743760
NCDO2118_RS07200	N-acetylglucosamine-6-phosphate deacetylase 1502471:1503619 reverse MW:41211	Regular	11600360	0	413827396	48	10	20	30.63	140798	122447	40356	0	2	Pass1	PepFrag1	None	19738884	MWELEDWQEAAHGMLK	MWELEDWQEAAHGMLK	149	16	4.16	3968	6	6	1	0	29852160	65394		4049	5.1	b2b3b9*y4y8y9*y10y10y11y13y14y16	349342	1789	178169431628378	787796210855852	0.1819	Green	33200	19738843	19738865	343463	25614	25614.00	2.82	3	6586329
NCDO2118_RS07200	N-acetylglucosamine-6-phosphate deacetylase 1502471:1503619 reverse MW:41211	Regular	11600360	0	413827396	48	10	20	30.63	140798	122447	40356	0	3	Pass1	PepFrag1	None	24002302	NVIDWGIATPAEAIMMASLTPAK	NVIDWGIATPAEAIMMASLTPAK	318	23	4.07	3970	11	11	4	2	83474140	69860	Identified	3483	4.2	b4b6b7b8b9b9b13b14y3y4y9y14y17y23	449200	2265	208515545437082	168515545437082	0.0757	Green	50869	24002362	24002320	452110	10665	10665.00	2.45	2	12006218
NCDO2118_RS07200	N-acetylglucosamine-6-phosphate deacetylase 1502471:1503619 reverse MW:41211	Regular	11600360	0	413827396	48	10	20	30.63	140798	122447	40356	0	4	Pass1	PepFrag1	None	10365310	GGFLEITDGK	GGFLEITDGK	18	10	4.07	3971	3	3	0	0	1845233	53305		826	1.3	b6b7y6y9y10	242038	955	117245238725829	194490477451658	0.0068	Red	25833	10365292	10365309	313743	951	951.00	1.00	1	10365292
NCDO2118_RS07200	N-acetylglucosamine-6-phosphate deacetylase 1502471:1503619 reverse MW:41211	Regular	11600360	0	413827396	48	10	20	30.63	140798	122447	40356	0	5	Pass1	PepFrag1	None	18179392	ATESGVVIALGHSNATYK	ATESGVVIALGHSNATYK	182	18	7.77	3972	2	2	0	0	8342405	59858		942	1.5	b6y8y10y18	233797	1686	171263447111868	131263447111868	0.0058	Yellow	13849	18179263	18179263	266204	810	810.00	2.00	2	9094668
NCDO2118_RS07200	N-acetylglucosamine-6-phosphate deacetylase 1502471:1503619 reverse MW:41211	Regular	11600360	0	413827396	48	10	20	30.63	140798	122447	40356	0	6	Pass2	PepFrag2	None	20659899	AAGLPDGPYMLGEYEVEVR	AAGLPDGPYMLGEYEVEVR	276	19	3.69	3976	3	3	1	0	2350346	54356	Missing	544	2.8	b5b16y5y6y6	330386	1888	184683300593056	144683300593056	0.0287	Red	22127	20659229	20659214	299088	4034	4034.00	2.00	2	10334651
NCDO2118_RS07200	N-acetylglucosamine-6-phosphate deacetylase 1502471:1503619 reverse MW:41211	Regular	11600360	0	413827396	48	10	20	30.63	140798	122447	40356	0	7	Pass2	PepFrag2	None	19380807	DGAAWLPTGRPAASILTLK	DGAAWLPTGRPAASILTLK	295	19	10.12	3977	1	1	0	0	1016186	50714	Missing	78	1.6	y11	338932	1836	181276462984937	808509753232914	0.0066	Red	42538	19381329	19381352	383037	931	931.00	3.00	3	6467158
NCDO2118_RS07200	N-acetylglucosamine-6-phosphate deacetylase 1502471:1503619 reverse MW:41211	Regular	11600360	0	413827396	48	10	20	30.63	140798	122447	40356	0	8	Pass2	MissedCleavage	None	11646259	KGGFLEITDGK	KGGFLEITDGK	17	11	7.00	3973	3	3	0	0	6024808	58444		328	2.7	y4y6y8y10	163171	1090	128049326774957	880493267749569	0.0471	Yellow	3651	11646241	11646265	206144	6634	6634.00	2.00	2	5828157
NCDO2118_RS07200	N-acetylglucosamine-6-phosphate deacetylase 1502471:1503619 reverse MW:41211	Regular	11600360	0	413827396	48	10	20	30.63	140798	122447	40356	0	9	Pass2	VarMod	Phosphoryl STY(*)	35406539	GADHVVLITDSMRAAGLPDGPYMLGEYEVEVR	GADHVVLITDSMRAAGLPDGPYMLGEYEVEVR	263	32	4.06	3974	5	5	0	1	6782437	58959	Identified	1118	3.2	b3b6b14b15-H3PO4b16-H3PO4b17b26y5y7y29	407293	3199	262483773512964	912418867564822	0.0259	Yellow	27472	35406435	35406404	320602	3651	3651.00	3.64	4	8859163
NCDO2118_RS07200	N-acetylglucosamine-6-phosphate deacetylase 1502471:1503619 reverse MW:41211	Regular	11600360	0	413827396	48	10	20	30.63	140798	122447	40356	0	10	Pass2	VarMod	Oxidation M(19);Oxidation M(20);Phosphoryl STY(1)	29114344	TAVKNVIDWGIATPAEAIMMASLTPAK	TAVKNVIDWGIATPAEAIMMASLTPAK	314	27	7.00	3975	3	3	1	0	3323529	55861	Missing	2208	2.1	b5b6b7*b7b11b12b12	412892	2665	232393749543872	114929166362581	0.0095	Yellow	37103	29114385	29114331	359181	1340	1340.00	3.00	3	9711510
NCDO2118_RS07200	N-acetylglucosamine-6-phosphate deacetylase 1502471:1503619 reverse MW:41211	Regular	12314630	0	413827396	25	5	20	17.80	162974	37737	52337	1	1	Pass1	PepFrag1	Carbamidomethyl C(3)	16187643	AVCTVVGEHYQEAR	AVCTVVGEHYQEAR	104	14	5.30	972	15	15	9	3	325471700	76029		8716	4.8	b3b4b5b6b8b10y2y3y3y4y5y7y8y9y9y10y11y12y14	159919	1415	152380920983341	615872806555605	0.1474	Green	2520	16187524	16187565	159919	24025	24025.00	2.65	3	5402556
NCDO2118_RS07200	N-acetylglucosamine-6-phosphate deacetylase 1502471:1503619 reverse MW:41211	Regular	12314630	0	413827396	25	5	20	17.80	162974	37737	52337	0	2	Pass1	PepFrag1	None	6873712	TYYIK	TYYIK	1	5	9.52	973	3	3	1	1	26318590	65107		188	1.1	b2b3y3	116021	634	892248458087377	138449691617475	0.0070	Green	1780	6873748	6873762	146322	1133	1133.00	1.00	1	6873748
NCDO2118_RS07200	N-acetylglucosamine-6-phosphate deacetylase 1502471:1503619 reverse MW:41211	Regular	12314630	0	413827396	25	5	20	17.80	162974	37737	52337	0	3	Pass2	PepFrag2	None	7554410	IGLAPER	IGLAPER	166	7	7.00	976	2	2	0	0	2284336	54492	Missing	42393	6.0	b2y2y6y7	150376	710	962199661996764	152439932399353	0.8266	Yellow	7518	7554294	7554308	211700	134717	134717.00	1.00	1	7554294
NCDO2118_RS07200	N-acetylglucosamine-6-phosphate deacetylase 1502471:1503619 reverse MW:41211	Regular	12314630	0	413827396	25	5	20	17.80	162974	37737	52337	0	4	Pass2	VarMod	Oxidation M(1);Phosphoryl STY(11)	17688121	MKGADHVVLITDSMR	MKGADHVVLITDSMR	261	15	7.82	974	2	2	0	0	3131659	55862		623	2.0	b7b8b11b11-H3PO4y5-H3PO4y12	222213	1570	163314997706331	123314997706331	0.0124	Yellow	5696	17688193	17688183	194905	2017	2017.00	2.47	2	8849133
NCDO2118_RS07200	N-acetylglucosamine-6-phosphate deacetylase 1502471:1503619 reverse MW:41211	Regular	12314630	0	413827396	25	5	20	17.80	162974	37737	52337	0	5	Pass2	VarMod	Phosphoryl STY(1)	28794446	TAVKNVIDWGIATPAEAIMMASLTPAK	TAVKNVIDWGIATPAEAIMMASLTPAK	314	27	7.00	975	3	3	0	0	1834512	53539	Missing	417	1.9	b7b21y27y27*	365450	2665	232393749543872	114929166362581	0.0066	Yellow	17305	28794581	28794530	384237	1082	1082.00	3.00	3	9604909
NCDO2118_RS07200	N-acetylglucosamine-6-phosphate deacetylase 1502471:1503619 reverse MW:41211	Regular	6096923	0.24	413827396	30	3	20	9.42	83979	124509	25827	1	1	Pass1	PepFrag1	None	15477417	GIFFEGPFFTEEK	GIFFEGPFFTEEK	123	13	3.96	4177	14	14	6	4	104654700	68049	Identified	22778	7.0	b2b3b4b5b9b10b13y2y3y4y5y7y8y8y9y9y11y13	388778	1405	151662141384316	111662141384316	0.8858	Green	33618	15477469	15477478	370768	74388	74388.00	1.97	2	7743771
NCDO2118_RS07200	N-acetylglucosamine-6-phosphate deacetylase 1502471:1503619 reverse MW:41211	Regular	6096923	0.24	413827396	30	3	20	9.42	83979	124509	25827	0	2	Pass1	PepFrag1	None	24002302	NVIDWGIATPAEAIMMASLTPAK	NVIDWGIATPAEAIMMASLTPAK	318	23	4.07	4178	11	11	3	2	40399380	63915	Identified	2287	3.9	b4b5b6b7b9b9b13y3y5y7y14y16y19y23	451457	2265	208515545437082	168515545437082	0.1026	Green	43417	24002272	24002222	452315	8618	8618.00	2.46	2	12006172
NCDO2118_RS07200	N-acetylglucosamine-6-phosphate deacetylase 1502471:1503619 reverse MW:41211	Regular	6096923	0.24	413827396	30	3	20	9.42	83979	124509	25827	0	3	Pass2	PepFrag2	None	10365310	GGFLEITDGK	GGFLEITDGK	18	10	4.07	4179	5	5	1	1	3932748	53798		762	1.3	b3b6b7y7y10	235877	955	117245238725829	194490477451658	0.0116	Red	21395	10365101	10365117	315677	973	973.00	1.37	1	10365101
NCDO2118_RS07200	N-acetylglucosamine-6-phosphate deacetylase 1502471:1503619 reverse MW:41211	Regular	7150555	0.26	413827396	26	7	20	23.56	52417	41765	14739	1	1	Pass1	PepFrag1	None	15477417	GIFFEGPFFTEEK	GIFFEGPFFTEEK	123	13	3.96	3433	8	8	5	2	133922800	69812	Missing	8986	5.1	b3b4y3y4y8y9y10y11	384658	1405	151662141384316	111662141384316	0.5834	Green	26885	15477440	15477447	373241	30580	30580.00	2.00	2	7743757
NCDO2118_RS07200	N-acetylglucosamine-6-phosphate deacetylase 1502471:1503619 reverse MW:41211	Regular	7150555	0.26	413827396	26	7	20	23.56	52417	41765	14739	0	2	Pass1	PepFrag1	None	19738884	MWELEDWQEAAHGMLK	MWELEDWQEAAHGMLK	149	16	4.16	3432	4	4	0	0	12883530	59644		996	3.3	b4b14*y8y9y9*y11y14	372998	1789	178169431628378	787796210855852	0.1500	Green	23031	19738943	19738970	351331	7864	7864.00	3.00	3	6586363
NCDO2118_RS07200	N-acetylglucosamine-6-phosphate deacetylase 1502471:1503619 reverse MW:41211	Regular	7150555	0.26	413827396	26	7	20	23.56	52417	41765	14739	0	3	Pass1	PepFrag1	None	19380807	DGAAWLPTGRPAASILTLK	DGAAWLPTGRPAASILTLK	295	19	10.12	3431	2	2	0	0	1660191	50745	Missing	1296	2.6	b2b12b14b17	348320	1836	181276462984937	808509753232914	0.0634	Red	20664	19380866	19380894	338332	3321	3321.00	3.00	3	6467004
NCDO2118_RS07200	N-acetylglucosamine-6-phosphate deacetylase 1502471:1503619 reverse MW:41211	Regular	7150555	0.26	413827396	26	7	20	23.56	52417	41765	14739	0	4	Pass1	PepFrag1	None	24002302	NVIDWGIATPAEAIMMASLTPAK	NVIDWGIATPAEAIMMASLTPAK	318	23	4.07	3434	7	7	0	1	32052320	63602	Identified	948	2.6	b8b9b12*b21*y1y4y7y9y12y14y23	465704	2265	208515545437082	168515545437082	0.0530	Green	35078	24002442	24002383	453818	2779	2779.00	2.40	2	12006257
NCDO2118_RS07200	N-acetylglucosamine-6-phosphate deacetylase 1502471:1503619 reverse MW:41211	Regular	7150555	0.26	413827396	26	7	20	23.56	52417	41765	14739	0	5	Pass2	PepFrag2	None	15107213	ADQFFYAYETKK	ADQFFYAYETKK	6	12	6.89	3437	0	0	0	0	1302691	49692		152	1.5	b12*y4	203412	1363	148624430928756	590829539525039	0.0207	Red	5107	15106847	15106888	241008	1087	1087.00	3.00	3	5042331
NCDO2118_RS07200	N-acetylglucosamine-6-phosphate deacetylase 1502471:1503619 reverse MW:41211	Regular	7150555	0.26	413827396	26	7	20	23.56	52417	41765	14739	0	6	Pass2	MissedCleavage	None	8835360	KIGLAPER	KIGLAPER	165	8	10.12	3435	1	1	0	0	652981	46692	Missing	1936	2.0	y7y8	274278	845	108059786919021	176119573838043	0.0724	Red	6477	8835253	8835269	252294	3793	3793.00	1.00	1	8835253
NCDO2118_RS07200	N-acetylglucosamine-6-phosphate deacetylase 1502471:1503619 reverse MW:41211	Regular	7150555	0.26	413827396	26	7	20	23.56	52417	41765	14739	0	7	Pass2	MissedCleavage	None	19460342	KATESGVVIALGHSNATYK	KATESGVVIALGHSNATYK	181	19	9.63	3436	4	4	1	1	9729394	58424		425	2.5	b8b9b13b16*y10	395731	1821	180287769086764	801918460578428	0.0571	Yellow	28738	19460096	19460124	383838	2993	2993.00	2.73	3	6493414
NCDO2118_RS07200	N-acetylglucosamine-6-phosphate deacetylase 1502471:1503619 reverse MW:41211	Regular	3620248	0.35	413827396	23	7	20	19.37	33483	21678	8372	1	1	Pass1	PepFrag1	Carbamidomethyl C(3)	16187643	AVCTVVGEHYQEAR	AVCTVVGEHYQEAR	104	14	5.30	1766	9	9	5	1	92381060	65243		3979	3.9	b5b9y4y5y8y9y10y11y12y14	156781	1415	152380920983341	615872806555605	0.4056	Green	2451	16187581	16187602	162019	13582	13582.00	2.79	3	5402576
NCDO2118_RS07200	N-acetylglucosamine-6-phosphate deacetylase 1502471:1503619 reverse MW:41211	Regular	3620248	0.35	413827396	23	7	20	19.37	33483	21678	8372	0	2	Pass1	PepFrag1	None	20659899	AAGLPDGPYMLGEYEVEVR	AAGLPDGPYMLGEYEVEVR	276	19	3.69	1767	2	2	0	0	2227003	49065	Missing	315	1.6	b13b13y18	322304	1888	184683300593056	144683300593056	0.0260	Red	13617	20659840	20659785	338299	870	870.00	2.00	2	10334957
NCDO2118_RS07200	N-acetylglucosamine-6-phosphate deacetylase 1502471:1503619 reverse MW:41211	Regular	3620248	0.35	413827396	23	7	20	19.37	33483	21678	8372	0	3	Pass2	PepFrag2	None	15107213	ADQFFYAYETKK	ADQFFYAYETKK	6	12	6.89	1768	2	2	0	0	3940558	51543		758	1.8	b3y9y12	227791	1363	148624430928756	108624430928756	0.0579	Yellow	6951	15107033	15107036	217490	1938	1938.00	2.00	2	7558553
NCDO2118_RS07200	N-acetylglucosamine-6-phosphate deacetylase 1502471:1503619 reverse MW:41211	Regular	3620248	0.35	413827396	23	7	20	19.37	33483	21678	8372	0	4	Pass2	VarMod	Phosphoryl STY(*)	24801965	NVIDWGIATPAEAIMMASLTPAK	NVIDWGIATPAEAIMMASLTPAK	318	23	4.07	1770	4	4	0	0	8825524	55045	Identified	2103	4.1	b11y6y11y14y15y23	406830	2265	208515545437082	990103636247212	0.2966	Yellow	12607	24802001	24801972	305099	9931	9931.00	2.56	3	8274049
NCDO2118_RS07200	N-acetylglucosamine-6-phosphate deacetylase 1502471:1503619 reverse MW:41211	Regular	3620248	0.35	413827396	23	7	20	19.37	33483	21678	8372	0	5	Pass2	VarMod	Carbamidomethyl C(3);Phosphoryl STY(4)	16987306	AVCTVVGEHYQEAR	AVCTVVGEHYQEAR	104	14	5.30	1769	1	1	0	0	414969	41768		142	2.6	b13-H3PO4b14y10*	156781	1415	152380920983341	112380920983341	0.1345	Red	10082	16987424	16987411	257178	4502	4502.00	2.00	2	8498749
NCDO2118_RS07200	N-acetylglucosamine-6-phosphate deacetylase 1502471:1503619 reverse MW:41211	Regular	3620248	0.35	413827396	23	7	20	19.37	33483	21678	8372	0	6	Pass2	VarMod	Carbamidomethyl C(3);Phosphoryl STY(4)	19548841	AVCTVVGEHYQEARGAK	AVCTVVGEHYQEARGAK	104	17	7.16	1772	2	2	0	0	1892115	48357		262	1.8	b3y8y17*	151833	1665	169838362045012	129838362045012	0.0400	Red	7367	19548920	19548879	222032	1339	1339.00	2.00	2	9779497
NCDO2118_RS07200	N-acetylglucosamine-6-phosphate deacetylase 1502471:1503619 reverse MW:41211	Regular	3620248	0.35	413827396	23	7	20	19.37	33483	21678	8372	0	7	Pass2	VarMod	Phosphoryl STY(*)	22619865	MTYYIKADQFFYAYETK	MTYYIKADQFFYAYETK	0	17	6.79	1771	3	3	0	0	4710883	52318		813	1.8	y4y7y8y17	327339	1986	191020127365074	151020127365074	0.0395	Yellow	9470	22619909	22619826	248891	1321	1321.00	2.26	2	11314991
NCDO2118_RS07200	N-acetylglucosamine-6-phosphate deacetylase 1502471:1503619 reverse MW:41211	Regular	2041268	0.95	413827396	12	5	20	12.30	16948	8933	2333	1	1	Pass1	PepFrag1	Carbamidomethyl C(3)	16187643	AVCTVVGEHYQEAR	AVCTVVGEHYQEAR	104	14	5.30	1811	7	7	4	1	50324830	60117		1368	2.9	b6y8y9y10y11y12y12*y14	160741	1415	152380920983341	615872806555605	0.3524	Green	2287	16187614	16187647	162291	5972	5972.00	2.82	3	5402587
NCDO2118_RS07200	N-acetylglucosamine-6-phosphate deacetylase 1502471:1503619 reverse MW:41211	Regular	2041268	0.95	413827396	12	5	20	12.30	16948	8933	2333	0	2	Pass1	PepFrag1	None	16758366	GIFFEGPFFTEEKK	GIFFEGPFFTEEKK	123	14	4.56	1814	1	1	0	0	674690	41390	Missing	91	1.8	b7y9	346704	1540	161227869348147	121227869348147	0.0935	Red	9300	16758243	16758232	261967	1584	1584.00	2.00	2	8384158
NCDO2118_RS07200	N-acetylglucosamine-6-phosphate deacetylase 1502471:1503619 reverse MW:41211	Regular	2041268	0.95	413827396	12	5	20	12.30	16948	8933	2333	0	3	Pass1	PepFrag1	None	15477417	GIFFEGPFFTEEK	GIFFEGPFFTEEK	123	13	3.96	1813	1	1	0	0	1500941	44863	Identified	221	1.6	b7b10y7	365043	1405	151662141384316	111662141384316	0.0812	Red	10851	15477429	15477429	294382	1377	1377.00	2.19	2	7743751
NCDO2118_RS07200	N-acetylglucosamine-6-phosphate deacetylase 1502471:1503619 reverse MW:41211	Regular	2041268	0.95	413827396	12	5	20	12.30	16948	8933	2333	0	4	Pass1	PepFrag1	None	20659899	AAGLPDGPYMLGEYEVEVR	AAGLPDGPYMLGEYEVEVR	276	19	3.69	1812	2	2	0	0	2106752	46335	Missing	475	1.6	b19y7y19	317131	1888	184683300593056	144683300593056	0.0546	Red	12093	20659838	20659784	338334	925	925.00	2.00	2	10334955
NCDO2118_RS07200	N-acetylglucosamine-6-phosphate deacetylase 1502471:1503619 reverse MW:41211	Regular	2041268	0.95	413827396	12	5	20	12.30	16948	8933	2333	0	5	Pass2	PepFrag2	None	14137155	GADHVVLITDSMR	GADHVVLITDSMR	263	13	5.10	1815	1	1	0	0	479271	39905		178	3.0	b10y9	255714	1311	144819850668613	104819850668613	0.4183	Red	10436	14137449	14137459	284177	7090	7090.00	2.00	2	7073761
NCDO2118_RS07200	N-acetylglucosamine-6-phosphate deacetylase 1502471:1503619 reverse MW:41211	Regular	3071066	2.26	413827396	13	4	20	12.57	11182	13878	3815	1	1	Pass1	PepFrag1	Carbamidomethyl C(3)	16187643	AVCTVVGEHYQEAR	AVCTVVGEHYQEAR	104	14	5.30	1660	8	8	4	1	68830450	63251		3197	3.1	b9b9b11*y5y8y9y10y11y12y14	160893	1415	152380920983341	615872806555605	0.6719	Green	2619	16187580	16187608	160893	7513	7513.00	2.69	3	5402575
NCDO2118_RS07200	N-acetylglucosamine-6-phosphate deacetylase 1502471:1503619 reverse MW:41211	Regular	3071066	2.26	413827396	13	4	20	12.57	11182	13878	3815	0	2	Pass1	PepFrag1	None	20659899	AAGLPDGPYMLGEYEVEVR	AAGLPDGPYMLGEYEVEVR	276	19	3.69	1661	2	2	0	0	6106060	52731	Identified	98	2.0	y3y10y12	319686	1888	184683300593056	144683300593056	0.1555	Yellow	15307	20659900	20659857	338007	1739	1739.00	2.00	2	10334986
NCDO2118_RS07200	N-acetylglucosamine-6-phosphate deacetylase 1502471:1503619 reverse MW:41211	Regular	3071066	2.26	413827396	13	4	20	12.57	11182	13878	3815	0	3	Pass2	PepFrag2	None	16748446	IGLAPERDGSEDFIR	IGLAPERDGSEDFIR	166	15	4.06	1662	0	0	0	0	6233714	52820	Identified	269	1.5	b13y9y11	261237	1529	160459200685454	669728004569691	0.0803	Yellow	12183	16748209	16748235	269933	898	898.00	2.53	3	5589452
NCDO2118_RS07200	N-acetylglucosamine-6-phosphate deacetylase 1502471:1503619 reverse MW:41211	Regular	3071066	2.26	413827396	13	4	20	12.57	11182	13878	3815	0	4	Pass2	VarMod	Phosphoryl STY(9);Phosphoryl STY(11)	36206202	GADHVVLITDSMRAAGLPDGPYMLGEYEVEVR	GADHVVLITDSMRAAGLPDGPYMLGEYEVEVR	263	32	4.06	1663	3	3	0	0	1809835	47449	Missing	251	2.0	b10y6y9b11-H3PO4	380036	3199	262483773512964	912418867564822	0.0923	Red	15420	36206454	36206454	339549	1032	1032.00	4.00	4	9059168
NCDO2118_RS07205	tellurite resistance protein TelA 1503792:1504970 reverse MW:44310	Regular	820727	0	443103053	15	5	32	3.83	39387	13411.5	10296	1	1	Pass1	PepFrag1	None	12175644	EAEQLDEQQK	EAEQLDEQQK	17	10	3.69	191	6	6	4	0	25682430	53238		1416	2.6	b4b5y4y5y6y7y8y10	109341	1086	127735864334797	877358643347971	0.1696	Yellow	1394	12175625	12175625	109341	6681	6681.00	2.00	2	6092849
NCDO2118_RS07205	tellurite resistance protein TelA 1503792:1504970 reverse MW:44310	Regular	820727	0	443103053	15	5	32	3.83	39387	13411.5	10296	0	2	Pass1	PepFrag1	None	5753399	SEIVK	SEIVK	27	5	7.00	192	3	3	0	1	11298370	49672		461	1.4	b3y2y5	118962	546	807646649952985	121529329990597	0.0574	Red	1707	5753415	5753415	118962	2260	2260.00	1.00	1	5753415
NCDO2118_RS07205	tellurite resistance protein TelA 1503792:1504970 reverse MW:44310	Regular	820727	0	443103053	15	5	32	3.83	39387	13411.5	10296	0	3	Pass2	PepFrag2	None	7904054	DALTSQR	DALTSQR	294	7	7.00	195	3	3	1	0	1201266	39938		7240	3.9	b5b6b6*b7y7	160958	710	962199661996764	152439932399353	0.7143	Red	3101	7903924	7903924	160958	28135	28135.00	1.00	1	7903924
NCDO2118_RS07205	tellurite resistance protein TelA 1503792:1504970 reverse MW:44310	Regular	820727	0	443103053	15	5	32	3.83	39387	13411.5	10296	0	4	Pass2	MissedCleavage	None	11736222	RQQGEVELSK	RQQGEVELSK	363	10	7.11	193	0	0	0	0	5479578	46529		42	1.3	b8	191803	1079	127186377299843	871863772998428	0.0239	Red	3781	11736198	11736198	191803	942	942.00	2.00	2	5873135
NCDO2118_RS07205	tellurite resistance protein TelA 1503792:1504970 reverse MW:44310	Regular	820727	0	443103053	15	5	32	3.83	39387	13411.5	10296	0	5	Pass2	VarMod	Phosphoryl STY(9)	12535885	RQQGEVELSK	RQQGEVELSK	363	10	7.11	194	3	3	0	1	2784818	43590		1137	1.5	b3b5b9*b9-H3PO4b10y7y10	147109	1079	127186377299843	871863772998428	0.0348	Red	2635	12535851	12535851	147109	1369	1369.00	2.00	2	6272962
NCDO2118_RS07205	tellurite resistance protein TelA 1503792:1504970 reverse MW:44310	Regular	22259320	0	443103053	74	13	32	41.33	169563	64819	50243	1	1	Pass1	PepFrag1	None	14848471	IQTSINTAIPLWK	IQTSINTAIPLWK	268	13	10.10	1861	10	10	3	2	127013800	74514	Identified	7011	4.7	b2*b3b3b4b4b5b6b8b9y4y5y7y8y11y12*y13	305732	1420	152739675565711	112739675565711	0.1484	Green	15254	14848422	14848432	309872	25167	25167.00	1.97	2	7429248
NCDO2118_RS07205	tellurite resistance protein TelA 1503792:1504970 reverse MW:44310	Regular	22259320	0	443103053	74	13	32	41.33	169563	64819	50243	0	2	Pass1	PepFrag1	None	17899113	LTQQNLVDTIQETMR	LTQQNLVDTIQETMR	340	15	4.07	1862	17	17	10	3	234887100	77184		14999	4.9	b2b2b4b5b5*b6*b7b8b9b11*y1y2y3y3y4y5y6*y7y8y9y11y12y12*y15y15*	266682	1666	169906358587853	129906358587853	0.1413	Green	15694	17899132	17899124	312383	23961	23961.00	2.20	2	8954602
NCDO2118_RS07205	tellurite resistance protein TelA 1503792:1504970 reverse MW:44310	Regular	22259320	0	443103053	74	13	32	41.33	169563	64819	50243	0	3	Pass1	PepFrag1	None	11936525	ISAFSQSVLNK	ISAFSQSVLNK	78	11	10.10	1859	10	10	9	0	217760700	76855		4466	3.7	b3y2y3y4y5y6y7y8y9y9*y9y10y10y11	221175	1119	130310584226708	903105842267078	0.0925	Green	2525	11936519	11936538	210854	15691	15691.00	2.00	2	5973296
NCDO2118_RS07205	tellurite resistance protein TelA 1503792:1504970 reverse MW:44310	Regular	22259320	0	443103053	74	13	32	41.33	169563	64819	50243	0	4	Pass1	PepFrag1	None	11837409	NQVAIALTLLK	NQVAIALTLLK	281	11	10.10	1863	8	8	3	0	19143600	66295		3243	3.0	b2b2*b3b6b8y3y4y6y7y9y11	338363	1173	134469867085327	944698670853269	0.0529	Green	20196	11837375	11837394	336014	8969	8969.00	1.75	2	5923724
NCDO2118_RS07205	tellurite resistance protein TelA 1503792:1504970 reverse MW:44310	Regular	22259320	0	443103053	74	13	32	41.33	169563	64819	50243	0	5	Pass1	PepFrag1	None	35727537	VQAQDLGEVGSSLTDLMFNLQQANPNELVAENK	VQAQDLGEVGSSLTDLMFNLQQANPNELVAENK	89	33	3.50	1864	13	13	5	1	25707340	67576	Identified	2059	3.8	b8b9b10*b14b14*b18b24y2y3y3y4y5y5*y6*y6y8y11y12y13y15y20	404162	3304	2681964304281	1387976202854	0.0335	Green	32218	35727527	35727408	419885	5675	5675.00	3.39	3	11915891
NCDO2118_RS07205	tellurite resistance protein TelA 1503792:1504970 reverse MW:44310	Regular	22259320	0	443103053	74	13	32	41.33	169563	64819	50243	0	6	Pass1	PepFrag1	None	13186314	LYDENLNYFK	LYDENLNYFK	173	10	4.07	1860	4	4	2	0	8669357	62855		1190	1.5	b5b6y4y4*y7y8y9	243932	1192	135918050833169	959180508331692	0.0088	Green	5634	13186331	13186347	245690	1494	1494.00	2.00	2	6598202
NCDO2118_RS07205	tellurite resistance protein TelA 1503792:1504970 reverse MW:44310	Regular	22259320	0	443103053	74	13	32	41.33	169563	64819	50243	0	7	Pass2	PepFrag2	None	12617151	ALNVYIAGAELK	ALNVYIAGAELK	183	12	6.89	1871	0	0	0	0	848754	52763		40	1.6	y3	289836	1207	137055924746872	970559247468722	0.0085	Red	5177	12617513	12617530	241539	1437	1437.00	2.00	2	6313793
NCDO2118_RS07205	tellurite resistance protein TelA 1503792:1504970 reverse MW:44310	Regular	22259320	0	443103053	74	13	32	41.33	169563	64819	50243	0	8	Pass2	MissedCleavage	None	19749875	MDNPILDDLMTNDKVIK	MDNPILDDLMTNDKVIK	0	17	3.87	1865	4	4	0	0	5443911	60834	Missing	6042	6.4	b6b7b16b17y12y15y17	327173	1858	182721691644367	818144610962443	0.2598	Green	18014	19749627	19749654	323894	44049	44049.00	2.81	3	6589924
NCDO2118_RS07205	tellurite resistance protein TelA 1503792:1504970 reverse MW:44310	Regular	22259320	0	443103053	74	13	32	41.33	169563	64819	50243	0	9	Pass2	MissedCleavage	None	12847270	LLQLSNNKQLN	LLQLSNNKQLN	381	11	10.10	1868	3	3	1	0	1574637	55447		1377	3.8	b2b3y11	191867	1220	138038274311234	980382743112345	0.0991	Yellow	8866	12847290	12847306	271841	16804	16804.00	2.00	2	6428681
[truncated: 43,401 more rows]
[truncated: 10 more columns]
